# Supplementary material for: Aminodiols, aminotetraols and 1,2,3-triazoles based on allo-gibberic acid: stereoselective syntheses and antiproliferative activities
Source: Royal Society of Chemistry journal article supplement (doi:10.1039/d4ra07334g), 2024-01-01
Supplement: d4ra07334g1.pdf [file d4ra07334g1.pdf]

## Supplementary data

### ***Allo*-gibberic acid-based aminodiols, aminotetraols, and 1,2,3-triazoles: stereoselective synthesis and antiproliferative activity**

**Zein Alabdeen Khdar,<sup>a</sup> Tam Minh Le,<sup>a,b</sup> Zsuzsanna Schelz,<sup>c</sup> István Zupkó<sup>c</sup> and Zsolt Szakonyi<sup>a,\*</sup>**

---

<sup>a.</sup> Interdisciplinary Excellent Center, Institute of Pharmaceutical Chemistry, University of Szeged, H-6720 Szeged, Eötvös utca 6, Hungary.

<sup>b.</sup> HUN-REN-SZTE Stereochemistry Research Group, University of Szeged, H-6720 Szeged, Eötvös utca 6, Hungary.

<sup>c.</sup> Interdisciplinary Excellent Center, Department of Pharmacodynamics and Biopharmacy, University of Szeged, H-6720 Szeged, Hungary.

\* Correspondence: szakonyi.zsolt@szte.hu; Tel.: +36-62-546809; Fax: +36-62-545705.

## Contents

|                                                                                                                                   |             |
|-----------------------------------------------------------------------------------------------------------------------------------|-------------|
| Antiproliferative effects of the investigated compounds                                                                           | S3 – S4     |
| $^1\text{H}$ , $^{13}\text{C}$ <i>J</i> -MOD, $^{19}\text{F}$ <i>J</i> -MOD NMR, COSY, NOESY, HSQC, HMBC spectra of new compounds | S5 – S242   |
| Table S2, Docking models for selected compounds                                                                                   | S243 – S254 |

Table S1: Antiproliferative effects of the investigated compounds

|    | Cc               | Growth inhibition (%) $\pm$ SEM |                   |                   |                   |                   |                  |
|----|------------------|---------------------------------|-------------------|-------------------|-------------------|-------------------|------------------|
|    | $\mu$ M          | HeLa                            | SiHa              | MCF-7             | MDA-MB-231        | A2780             | NIH/3T3          |
| 9  | 10               | 31.37 $\pm$ 1.46                | 34.99 $\pm$ 1.41  | 36.21 $\pm$ 2.68  | < 20              | 23.42 $\pm$ 1.32  | 21.76 $\pm$ 2.03 |
|    | 30               | 47.65 $\pm$ 2.83                | 39.79 $\pm$ 1.89  | 85.89 $\pm$ 0.93  | 65.20 $\pm$ 1.96  | 52.37 $\pm$ 2.58  | 37.58 $\pm$ 2.32 |
| 10 | 10               | 35.83 $\pm$ 0.72                | 28.22 $\pm$ 1.26  | 47.43 $\pm$ 1.52  | 27.04 $\pm$ 2.80  | 23.21 $\pm$ 1.49  | < 20             |
|    | 30               | 99.13 $\pm$ 0.29                | 95.63 $\pm$ 1.42  | 96.27 $\pm$ 0.21  | 98.07 $\pm$ 0.36  | 98.88 $\pm$ 0.14  | 93.81 $\pm$ 1.96 |
| 11 | 10               | 35.47 $\pm$ 0.94                | 30.18 $\pm$ 1.24  | 39.15 $\pm$ 1.69  | < 20              | 23.64 $\pm$ 1.20  | < 20             |
|    | 30               | 98.05 $\pm$ 0.72                | 94.59 $\pm$ 2.63  | 96.32 $\pm$ 0.23  | 97.62 $\pm$ 0.41  | 97.45 $\pm$ 0.36  | 97.65 $\pm$ 0.79 |
| 12 | 10               | 35.37 $\pm$ 1.85                | < 20              | < 20              | < 20              | < 20              | < 20             |
|    | 30               | 98.91 $\pm$ 0.39                | 96.35 $\pm$ 0.49  | 97.39 $\pm$ 0.46  | 99.01 $\pm$ 0.42  | 98.22 $\pm$ 0.16  | 96.35 $\pm$ 0.61 |
| 13 | 10               | 53.92 $\pm$ 2.18                | 34.47 $\pm$ 0.89  | 69.71 $\pm$ 3.91  | 55.19 $\pm$ 2.82  | 51.31 $\pm$ 0.81  | 33.03 $\pm$ 0.91 |
|    | 30               | 98.26 $\pm$ 0.57                | 94.95 $\pm$ 0.63  | 95.97 $\pm$ 1.05  | 99.13 $\pm$ 0.92  | 98.01 $\pm$ 0.10  | 98.28 $\pm$ 0.50 |
| 14 | 10               | 52.31 $\pm$ 2.49                | 20.34 $\pm$ 2.80  | 28.36 $\pm$ 3.38  | < 20              | 38.66 $\pm$ 1.77  | < 20             |
|    | 30               | 97.35 $\pm$ 0.73                | 93.30 $\pm$ 1.06  | 94.80 $\pm$ 1.24  | 97.45 $\pm$ 1.01  | 97.12 $\pm$ 0.34  | 97.31 $\pm$ 0.51 |
| 15 | 10               | 61.72 $\pm$ 2.04                | 36.59 $\pm$ 2.46  | 53.47 $\pm$ 2.44  | < 20              | 59.02 $\pm$ 1.66  | 27.62 $\pm$ 1.45 |
|    | 30               | 99.93 $\pm$ 0.05                | 100.40 $\pm$ 0.23 | 99.35 $\pm$ 0.23  | 99.94 $\pm$ 0.13  | 99.84 $\pm$ 0.15  | 99.65 $\pm$ 0.23 |
| 16 | 10               | 43.31 $\pm$ 3.63                | < 20              | 20.39 $\pm$ 3.51  | < 20              | 43.37 $\pm$ 3.01  | < 20             |
|    | 30               | 97.83 $\pm$ 0.67                | 94.60 $\pm$ 0.70  | 95.18 $\pm$ 1.14  | 98.17 $\pm$ 0.89  | 97.45 $\pm$ 0.16  | 97.93 $\pm$ 0.59 |
| 17 | 10               | 25.10 $\pm$ 0.88                | < 20              | < 20              | < 20              | < 20              | < 20             |
|    | 30               | 29.48 $\pm$ 1.98                | < 20              | 31.53 $\pm$ 2.04  | < 20              | < 20              | 27.23 $\pm$ 2.37 |
| 18 | 10               | 99.27 $\pm$ 0.13                | 99.82 $\pm$ 0.22  | 99.31 $\pm$ 0.19  | 99.12 $\pm$ 0.35  | 98.78 $\pm$ 0.33  | 99.30 $\pm$ 0.26 |
|    | 30               | 99.44 $\pm$ 0.13                | 100.30 $\pm$ 0.25 | 99.46 $\pm$ 0.17  | 99.50 $\pm$ 0.24  | 99.27 $\pm$ 0.23  | 99.44 $\pm$ 0.23 |
|    | IC <sub>50</sub> | 3.08 $\pm$ 0.07                 | 3.44 $\pm$ 0.15   | 2.12 $\pm$ 0.85   | 1.98 $\pm$ 0.35   | 1.61 $\pm$ 0.11   | 4.36 $\pm$ 0.21  |
| 19 | 10               | 24.80 $\pm$ 2.19                | 29.60 $\pm$ 1.73  | 35.57 $\pm$ 2.73  | < 20              | < 20              | < 20             |
|    | 30               | 95.47 $\pm$ 2.45                | 81.10 $\pm$ 3.07  | 93.65 $\pm$ 0.73  | 98.44 $\pm$ 0.37  | 98.36 $\pm$ 0.28  | 40.00 $\pm$ 1.49 |
| 20 | 10               | 27.38 $\pm$ 1.71                | 34.64 $\pm$ 1.01  | 36.42 $\pm$ 1.20  | < 20              | 22.12 $\pm$ 0.47  | < 20             |
|    | 30               | 99.12 $\pm$ 0.35                | 97.18 $\pm$ 1.29  | 96.51 $\pm$ 0.27  | 98.60 $\pm$ 0.42  | 98.99 $\pm$ 0.14  | 98.34 $\pm$ 0.47 |
| 21 | 10               | 27.37 $\pm$ 1.56                | 26.68 $\pm$ 1.12  | 38.09 $\pm$ 1.97  | < 20              | < 20              | < 20             |
|    | 30               | 98.93 $\pm$ 0.40                | 95.17 $\pm$ 1.74  | 96.76 $\pm$ 0.22  | 96.62 $\pm$ 1.66  | 98.89 $\pm$ 0.18  | 42.75 $\pm$ 3.68 |
| 22 | 10               | 46.39 $\pm$ 1.05                | 36.07 $\pm$ 3.79  | 91.70 $\pm$ 1.95  | 96.79 $\pm$ 1.04  | 53.99 $\pm$ 2.62  | 91.91 $\pm$ 2.72 |
|    | 30               | 97.59 $\pm$ 0.63                | 92.94 $\pm$ 1.37  | 94.97 $\pm$ 1.41  | 99.29 $\pm$ 1.15  | 98.24 $\pm$ 0.07  | 97.43 $\pm$ 0.41 |
| 23 | 10               | 99.69 $\pm$ 0.06                | 99.79 $\pm$ 0.23  | 99.29 $\pm$ 0.09  | 99.60 $\pm$ 0.09  | 97.50 $\pm$ 0.16  | 99.25 $\pm$ 0.21 |
|    | 30               | 100.60 $\pm$ 0.56               | 100.30 $\pm$ 0.13 | 100.10 $\pm$ 0.07 | 100.10 $\pm$ 0.14 | 99.12 $\pm$ 0.28  | 99.82 $\pm$ 0.23 |
|    | IC <sub>50</sub> | 3.31 $\pm$ 0.24                 | 3.52 $\pm$ 0.01   | 3.32 $\pm$ 0.95   | 5.05 $\pm$ 0.46   | 6.26 $\pm$ 0.18   | 4.54 $\pm$ 0.18  |
| 24 | 10               | 97.27 $\pm$ 0.68                | 76.61 $\pm$ 1.83  | 94.57 $\pm$ 1.54  | 98.36 $\pm$ 1.19  | 96.97 $\pm$ 0.29  | 97.23 $\pm$ 0.59 |
|    | 30               | 96.97 $\pm$ 0.69                | 92.18 $\pm$ 1.46  | 94.67 $\pm$ 1.38  | 98.19 $\pm$ 1.08  | 97.50 $\pm$ 0.16  | 96.98 $\pm$ 0.54 |
|    | IC <sub>50</sub> | 3.95 $\pm$ 0.06                 | 3.86 $\pm$ 0.03   | 3.94 $\pm$ 0.25   | 5.57 $\pm$ 0.72   | 6.48 $\pm$ 0.04   | 4.92 $\pm$ 0.15  |
| 25 | 10               | 99.94 $\pm$ 0.09                | 101.10 $\pm$ 0.38 | 99.50 $\pm$ 0.32  | 100.10 $\pm$ 0.12 | 100.10 $\pm$ 0.18 | 99.65 $\pm$ 0.18 |
|    | 30               | 99.72 $\pm$ 0.11                | 100.20 $\pm$ 0.11 | 99.86 $\pm$ 0.13  | 99.72 $\pm$ 0.14  | 99.66 $\pm$ 0.20  | 99.56 $\pm$ 0.31 |
|    | IC <sub>50</sub> | 3.44 $\pm$ 0.34                 | 2.99 $\pm$ 0.15   | 3.46 $\pm$ 0.59   | 4.45 $\pm$ 0.19   | 5.11 $\pm$ 0.98   | 4.31 $\pm$ 0.18  |
| 26 | 10               | 85.34 $\pm$ 2.45                | 91.94 $\pm$ 1.01  | 98.84 $\pm$ 0.35  | 99.26 $\pm$ 0.21  | 87.97 $\pm$ 2.79  | 92.79 $\pm$ 1.19 |
|    | 30               | 99.52 $\pm$ 0.16                | 100.20 $\pm$ 0.16 | 99.91 $\pm$ 0.22  | 99.71 $\pm$ 0.30  | 99.42 $\pm$ 0.14  | 99.54 $\pm$ 0.19 |
|    | IC <sub>50</sub> | 3.82 $\pm$ 0.30                 | 4.64 $\pm$ 0.17   | 3.92 $\pm$ 0.22   | 5.04 $\pm$ 0.03   | 5.99 $\pm$ 0.76   | 5.14 $\pm$ 0.21  |
| 27 | 10               | < 20                            | < 20              | < 20              | < 20              | < 20              | < 20             |
|    | 30               | 28.15 $\pm$ 2.89                | < 20              | < 20              | < 20              | < 20              | < 20             |
| 28 | 10               | 99.42 $\pm$ 0.15                | 100.10 $\pm$ 0.21 | 98.91 $\pm$ 0.24  | 99.11 $\pm$ 0.33  | 99.71 $\pm$ 0.23  | 99.16 $\pm$ 0.41 |
|    | 30               | 99.01 $\pm$ 0.14                | 99.71 $\pm$ 0.24  | 99.48 $\pm$ 0.26  | 99.04 $\pm$ 0.28  | 98.98 $\pm$ 0.29  | 99.03 $\pm$ 0.44 |
|    | IC <sub>50</sub> | 2.68 $\pm$ 0.76                 | 3.09 $\pm$ 0.19   | 1.49 $\pm$ 0.02   | 3.48 $\pm$ 0.47   | 3.31 $\pm$ 0.40   | 4.16 $\pm$ 0.07  |
| 29 | 10               | < 20                            | < 20              | < 20              | < 20              | < 20              | < 20             |

|                   |                  |              |              |              |              |              |              |
|-------------------|------------------|--------------|--------------|--------------|--------------|--------------|--------------|
|                   | 30               | < 20         | 26.19 ± 2.93 | < 20         | < 20         | < 20         | < 20         |
| <b>31</b>         | 10               | < 20         | < 20         | < 20         | < 20         | < 20         | < 20         |
|                   | 30               | < 20         | < 20         | 24.61 ± 1.84 | < 20         | < 20         | < 20         |
| <b>32</b>         | 10               | 95.32 ± 0.92 | 97.59 ± 0.36 | 93.53 ± 0.38 | 98.09 ± 0.19 | 99.03 ± 0.21 | 97.11 ± 0.23 |
|                   | 30               | 98.55 ± 0.46 | 96.45 ± 0.22 | 96.87 ± 0.44 | 98.12 ± 0.59 | 99.65 ± 0.32 | 97.44 ± 0.28 |
|                   | IC <sub>50</sub> | 4.10 ± 0.02  | 5.68 ± 0.68  | 3.70 ± 0.05  | 5.51 ± 0.25  | 5.42 ± 0.98  | 4.48 ± 0.28  |
| <b>33</b>         | 10               | 97.94 ± 0.24 | 84.55 ± 3.58 | 93.21 ± 0.76 | 93.46 ± 0.64 | 96.75 ± 0.64 | 83.73 ± 0.82 |
|                   | 30               | 98.96 ± 0.29 | 96.58 ± 0.59 | 94.45 ± 0.88 | 98.34 ± 0.66 | 99.77 ± 0.25 | 96.62 ± 0.33 |
|                   | IC <sub>50</sub> | 4.37 ± 0.05  | 6.04 ± 0.68  | 3.53 ± 0.19  | 6.26 ± 0.36  | 4.90 ± 0.54  | 5.53 ± 0.19  |
| <b>34</b>         | 10               | < 20         | < 20         | < 20         | < 20         | < 20         | < 20         |
|                   | 30               | < 20         | 23.30 ± 2.43 | < 20         | < 20         | < 20         | < 20         |
| <b>35</b>         | 10               | < 20         | < 20         | < 20         | < 20         | < 20         | < 20         |
|                   | 30               | < 20         | < 20         | < 20         | < 20         | < 20         | < 20         |
| <b>36</b>         | 10               | < 20         | < 20         | < 20         | < 20         | < 20         | < 20         |
|                   | 30               | < 20         | 29.31 ± 0.95 | 24.11 ± 1.66 | < 20         | < 20         | < 20         |
| <b>37</b>         | 10               | < 20         | < 20         | < 20         | < 20         | < 20         | < 20         |
|                   | 30               | < 20         | 21.60 ± 0.72 | < 20         | < 20         | < 20         | < 20         |
| <b>38</b>         | 10               | 95.20 ± 0.29 | 90.65 ± 0.88 | 86.22 ± 1.71 | 88.39 ± 2.26 | 93.82 ± 1.01 | 67.36 ± 1.57 |
|                   | 30               | 97.57 ± 0.81 | 95.80 ± 0.53 | 98.29 ± 0.27 | 97.53 ± 0.66 | 99.51 ± 0.30 | 96.90 ± 0.46 |
|                   | IC <sub>50</sub> | 4.48 ± 0.19  | 6.13 ± 1.26  | 4.65 ± 0.16  | 7.74 ± 0.13  | 5.65 ± 0.89  | 7.00 ± 0.23  |
| <b>39</b>         | 10               | 96.43 ± 0.25 | 81.07 ± 0.48 | 82.70 ± 2.27 | 82.08 ± 0.32 | 81.15 ± 2.07 | 78.12 ± 0.39 |
|                   | 30               | 98.45 ± 0.22 | 93.82 ± 0.58 | 91.61 ± 0.46 | 93.47 ± 1.01 | 98.63 ± 0.29 | 72.77 ± 0.62 |
|                   | IC <sub>50</sub> | 5.31 ± 0.21  | 8.23 ± 0.14  | 5.80 ± 1.26  | 8.05 ± 0.29  | 5.99 ± 0.24  | 8.31 ± 0.76  |
| <b>40</b>         | 10               | < 20         | < 20         | < 20         | < 20         | < 20         | < 20         |
|                   | 30               | 21.43 ± 1.69 | 28.27 ± 0.65 | 28.07 ± 2.38 | < 20         | < 20         | < 20         |
| <b>41</b>         | 10               | < 20         | < 20         | < 20         | < 20         | < 20         | < 20         |
|                   | 30               | < 20         | < 20         | 26.20 ± 2.18 | < 20         | < 20         | < 20         |
| <b>Cisplatin*</b> | 10               | 42.61 ± 2.33 | 60.98 ± 0.92 | 53.03 ± 2.29 | 67.51 ± 1.01 | 83.57 ± 1.21 | 73.88 ± 1.63 |
|                   | 30               | 99.93 ± 0.26 | 88.95 ± 0.53 | 86.90 ± 1.22 | 87.75 ± 1.10 | 95.02 ± 0.28 | 97.10 ± 0.15 |

\*: data from reference 10.3390/ijms24021121 (Bai D, Int J Mol Sci 2023)



<sup>1</sup>H-NMR (500 MHz) of Benzyl (2-((2-chloro-5-fluoropyrimidin-4-yl)amino)ethyl)carbamate **R1**

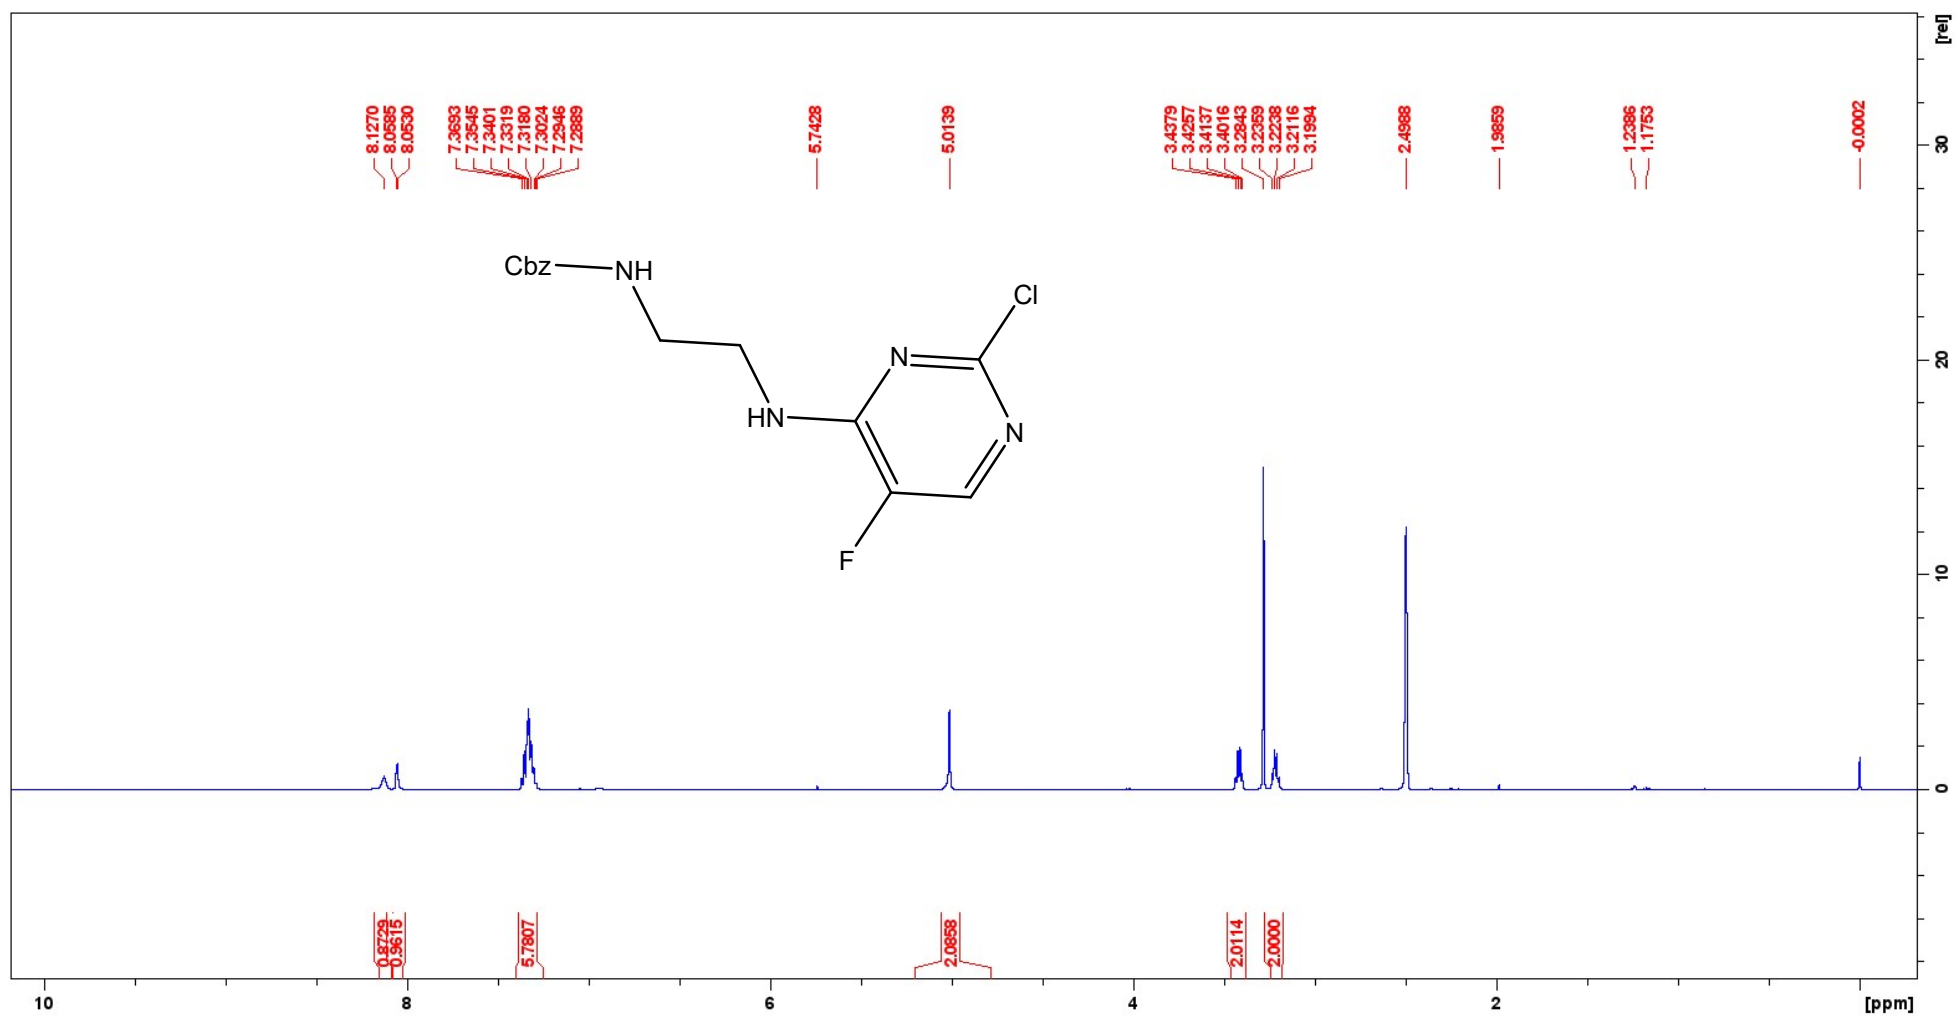

$^{13}\text{C}\{^1\text{H}\}$  J-MOD NMR (125 MHz) of Benzyl (2-((2-chloro-5-fluoropyrimidin-4-yl)amino)ethyl)carbamate **R1**

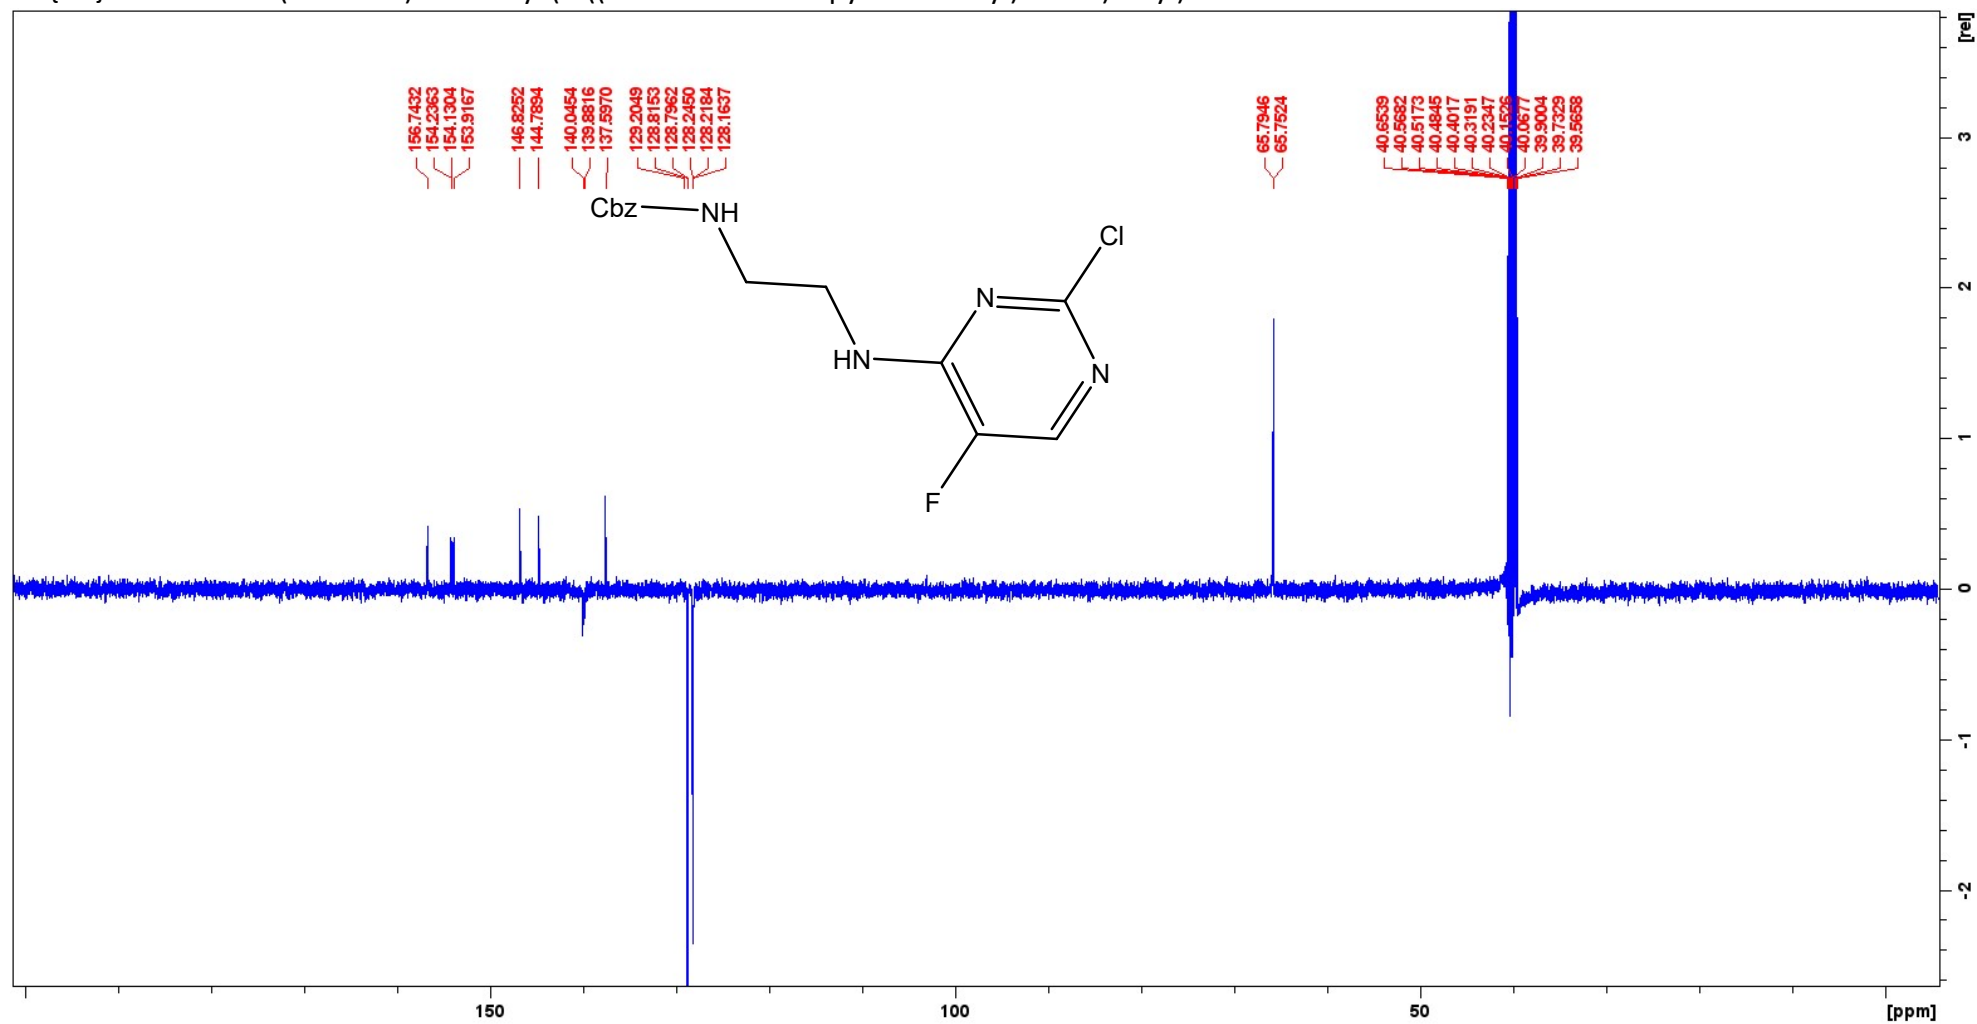

<sup>19</sup>F J-MOD NMR (470 MHz) of Benzyl (2-((2-chloro-5-fluoropyrimidin-4-yl)amino)ethyl)carbamate **R1**

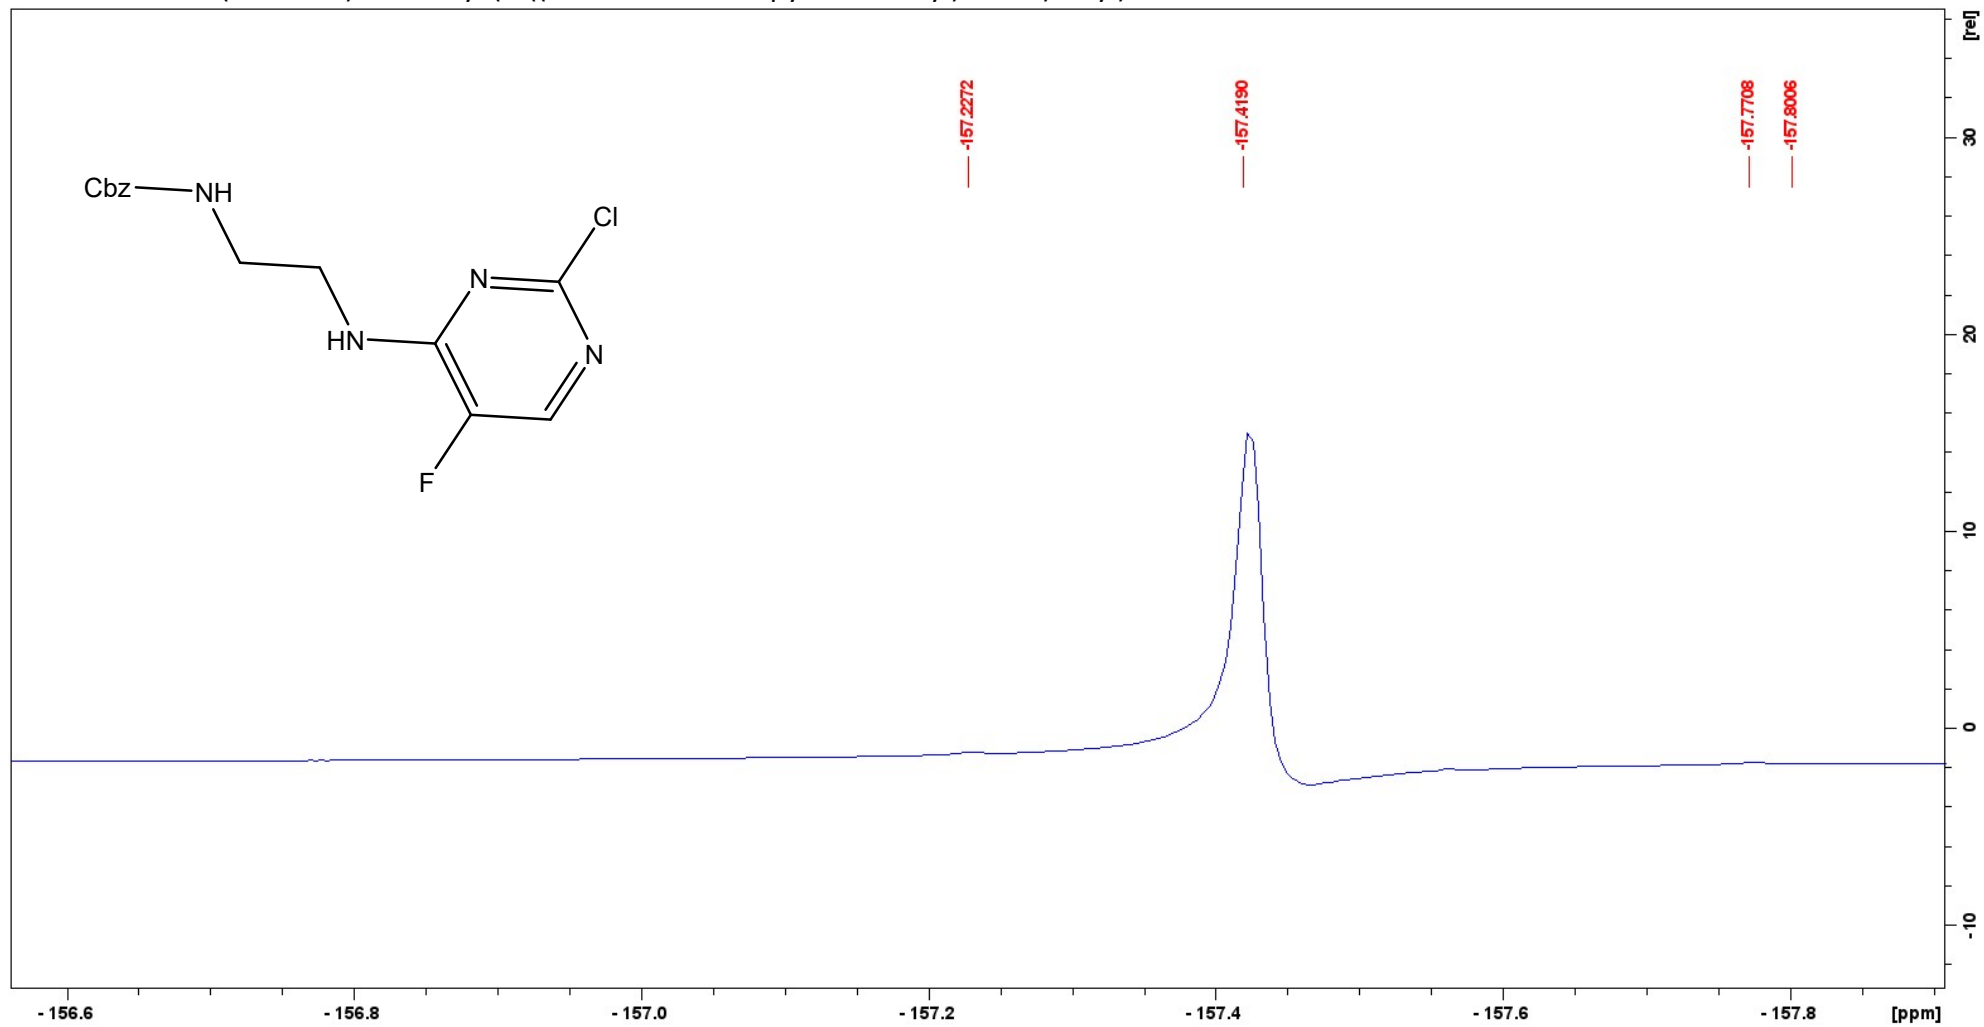

<sup>1</sup>H-NMR (500 MHz) of Benzyl (2-((5-fluoro-2-((4-(trifluoromethyl)phenyl)amino)pyrimidin-4-yl)amino)ethyl)carbamate **R2**

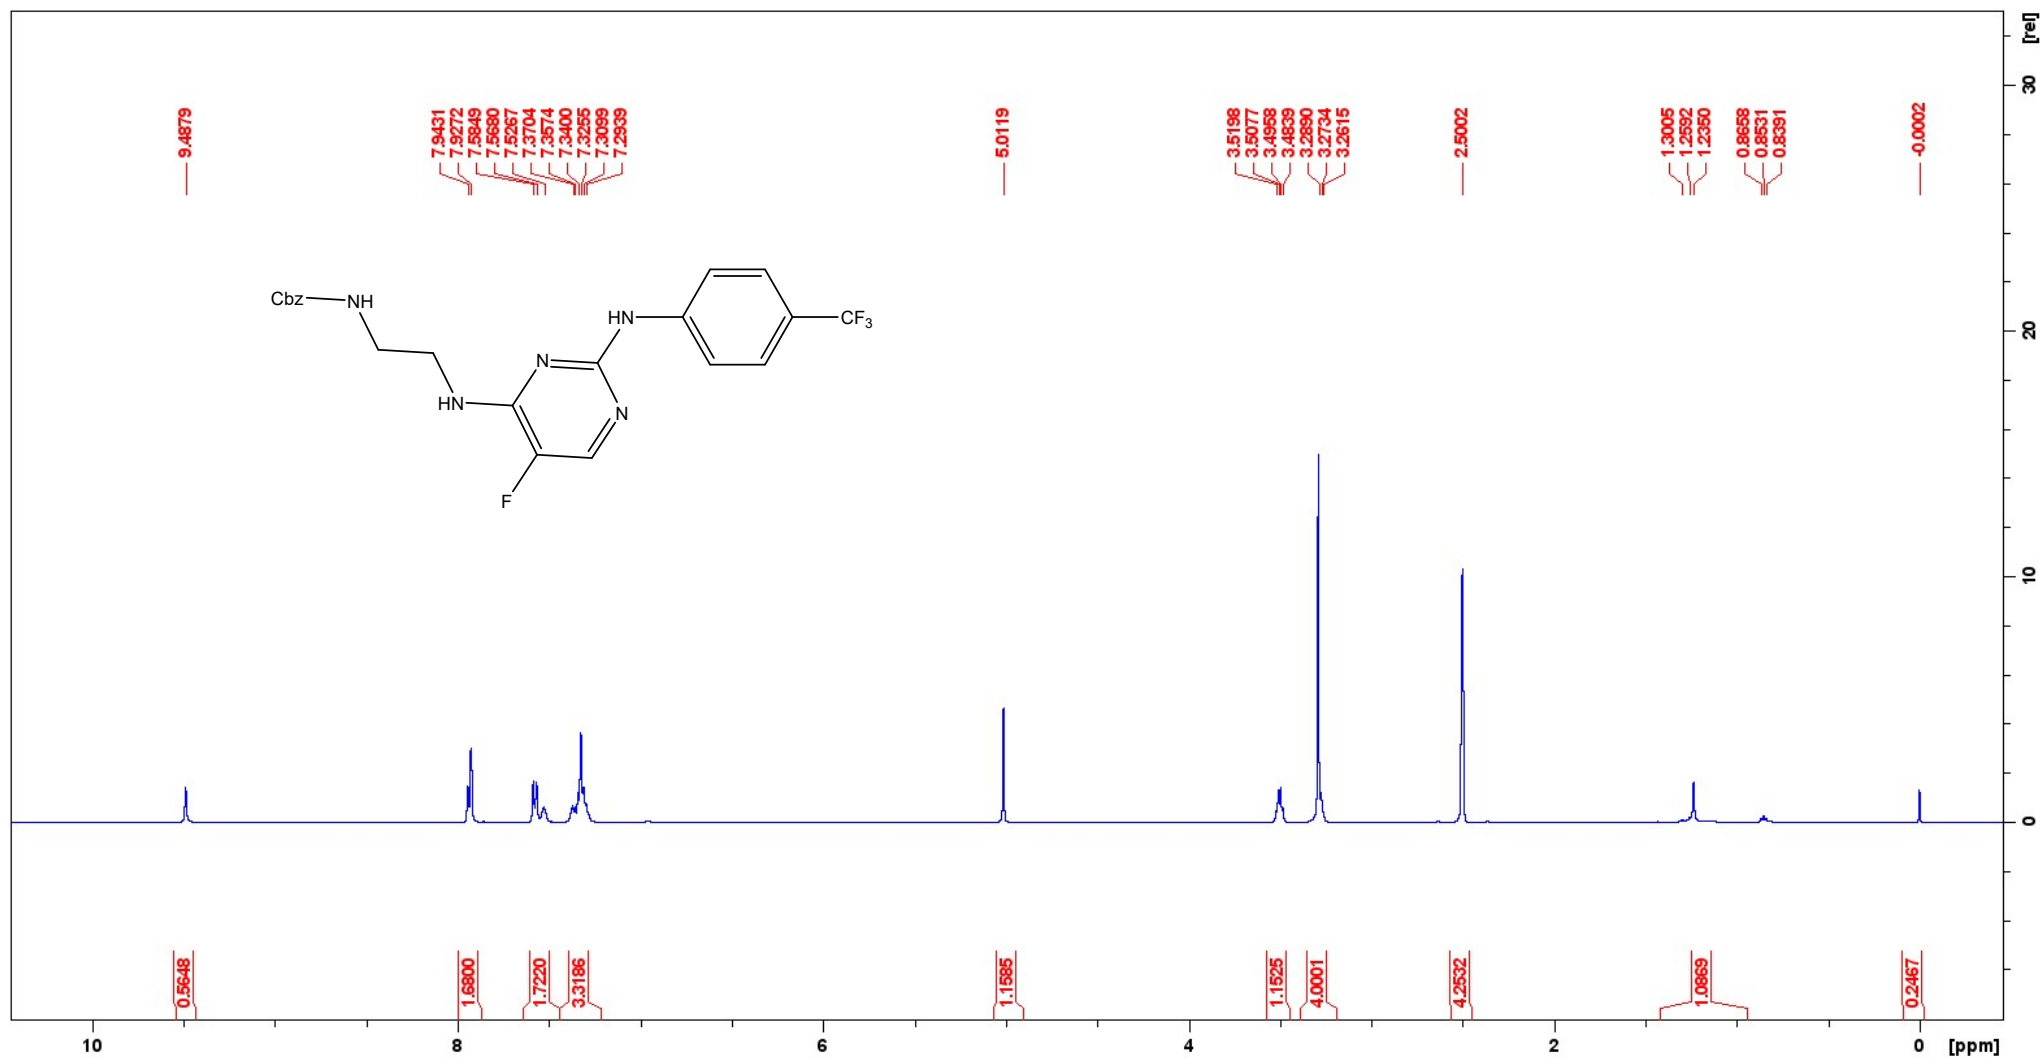

<sup>13</sup>C{<sup>1</sup>H} J-MOD NMR (125 MHz) of Benzyl (2-((5-fluoro-2-((4-(trifluoromethyl)phenyl)amino)pyrimidin-4-yl)amino)ethyl)carbamate **R2**

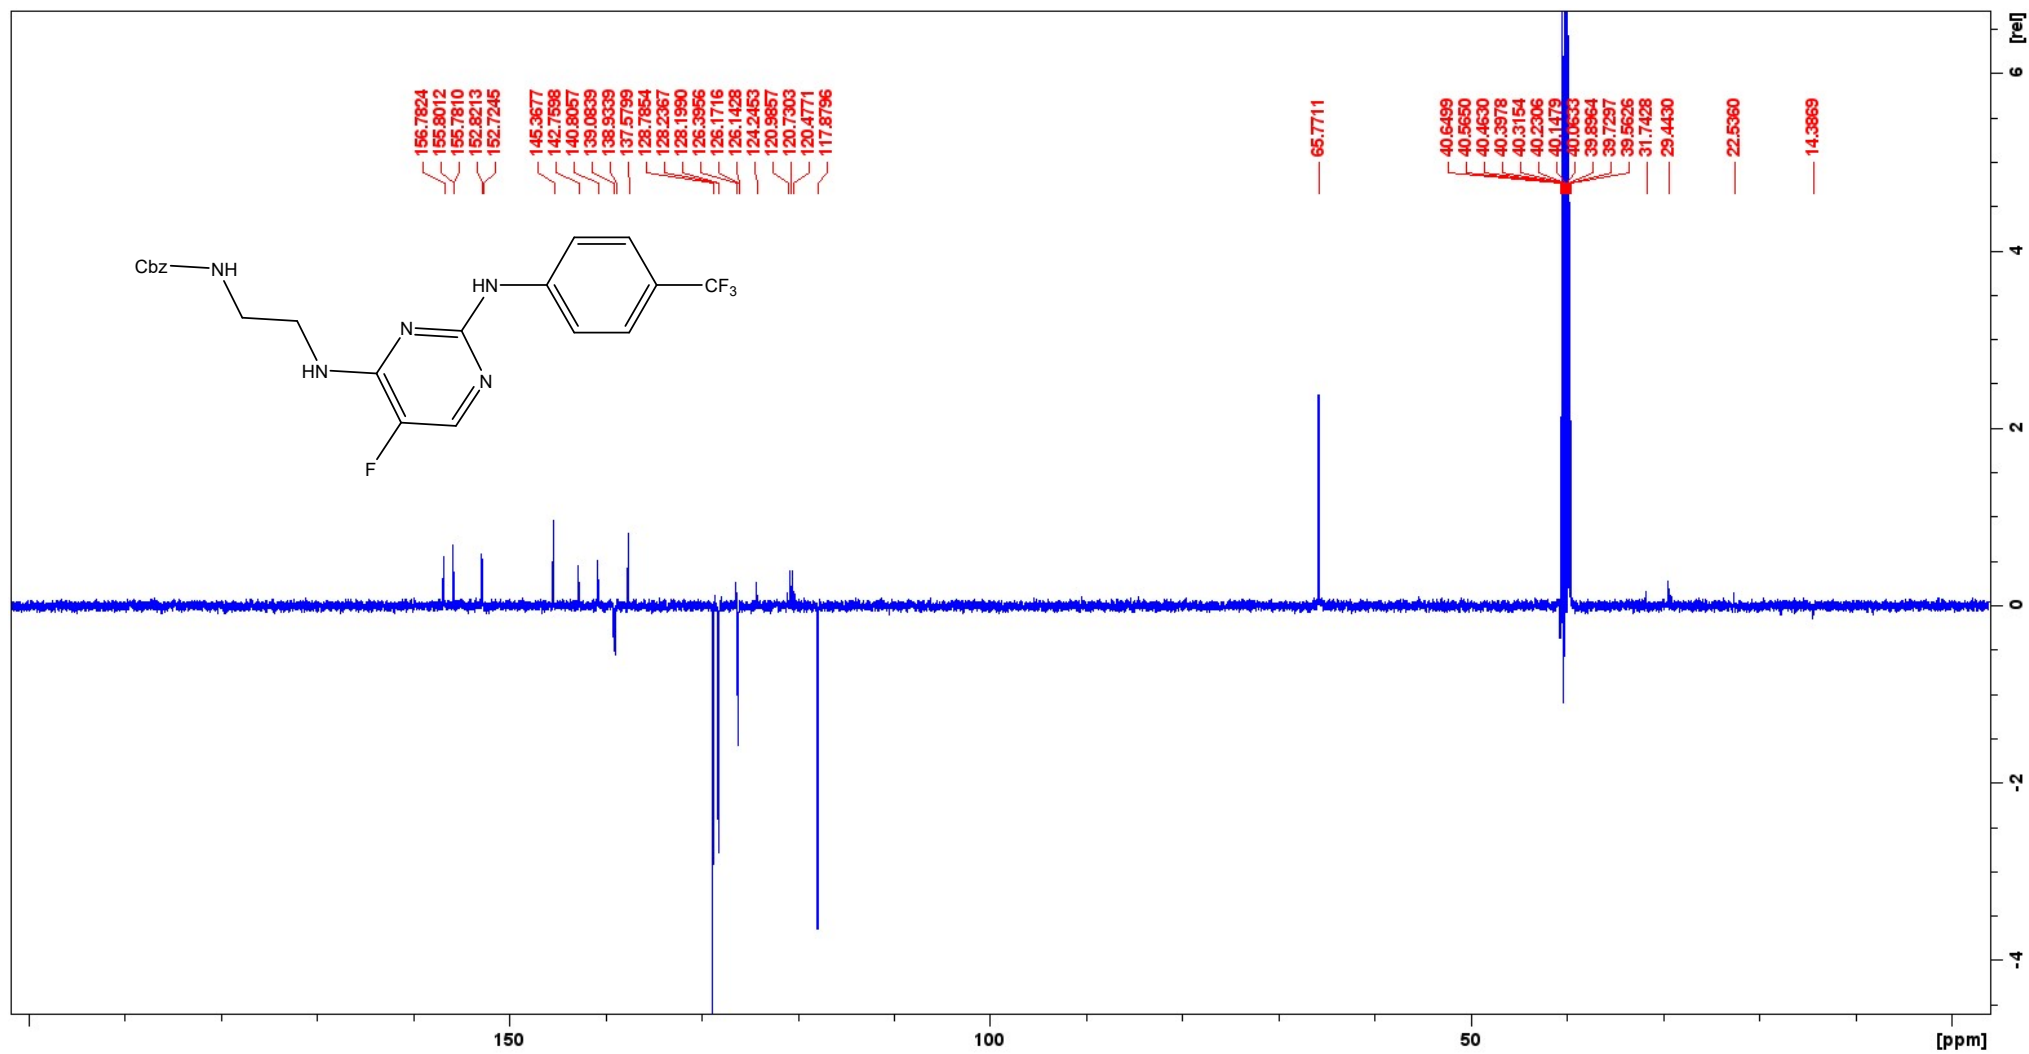

<sup>19</sup>F J-MOD NMR (470 MHz) of Benzyl (2-((5-fluoro-2-((4-(trifluoromethyl)phenyl)amino)pyrimidin-4-yl)amino)ethyl)carbamate **R2**

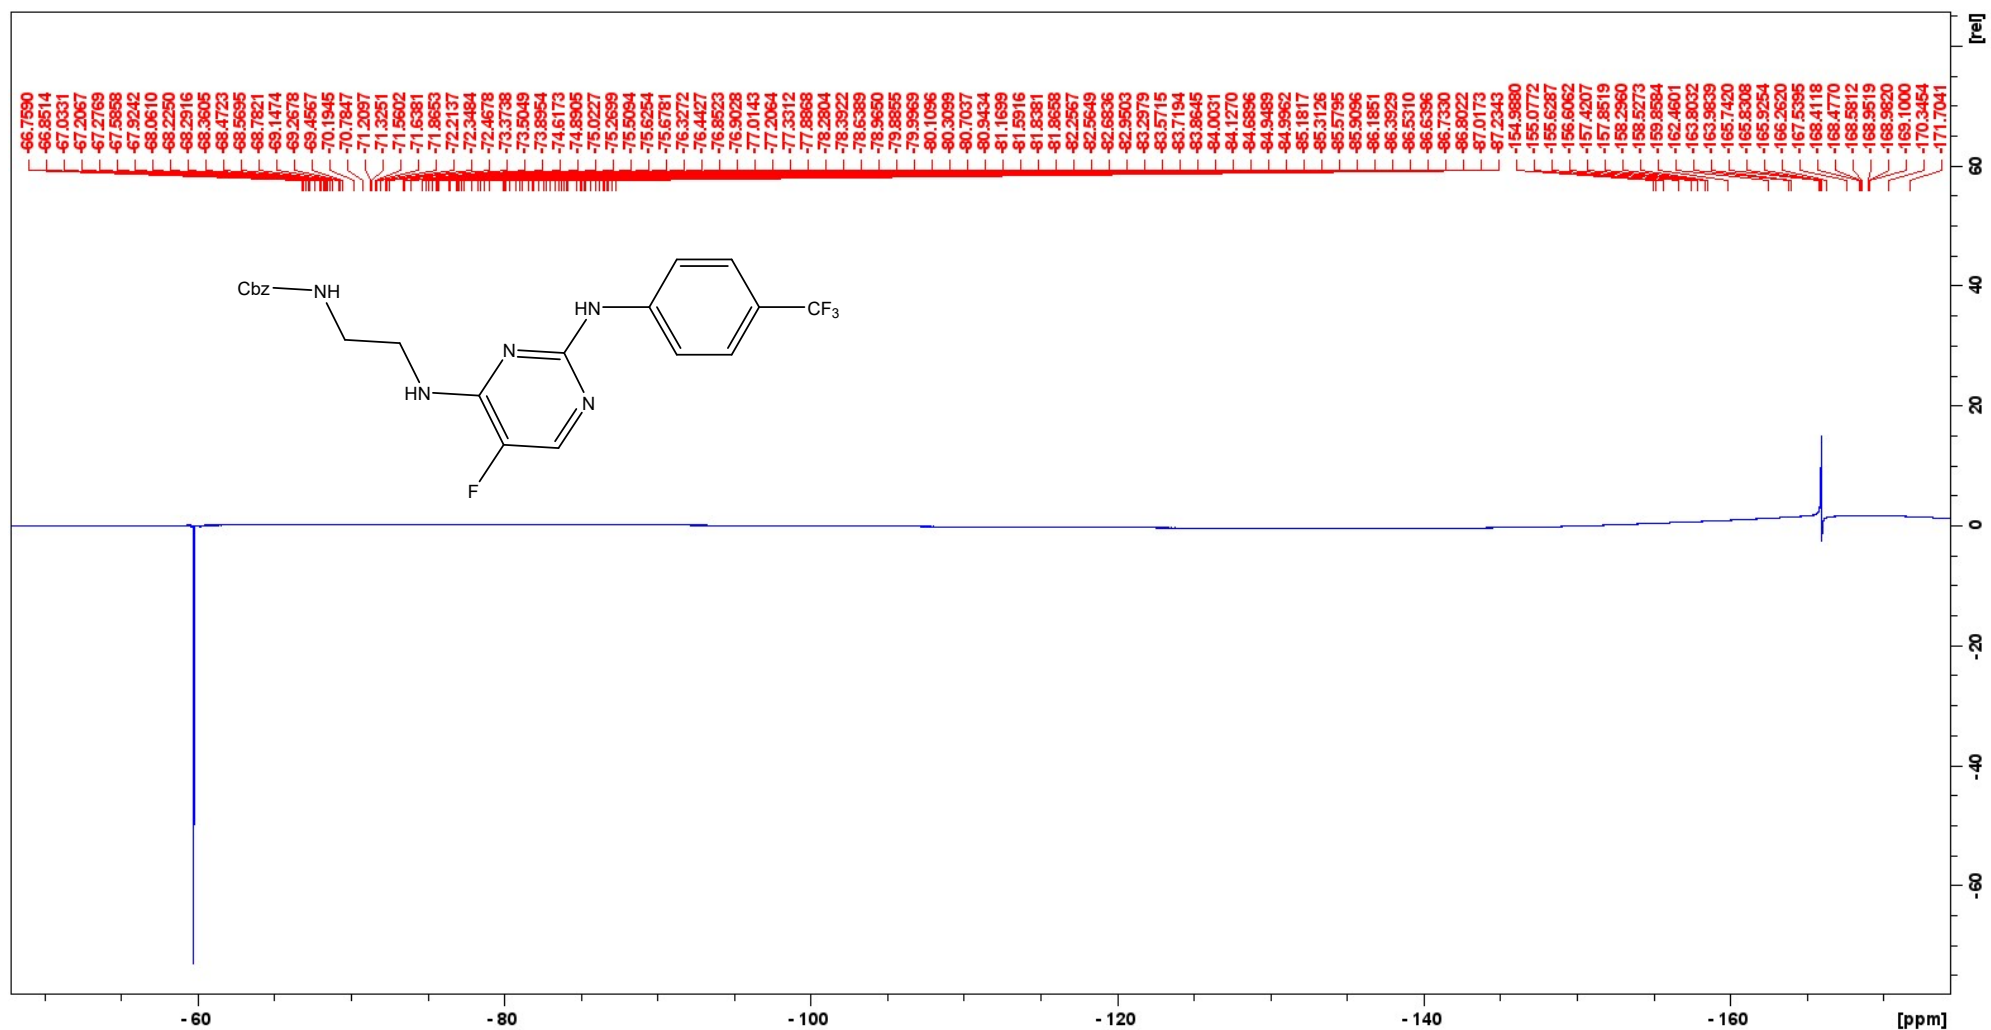

<sup>1</sup>H-NMR (500 MHz) of 2-Chloro-5-fluoro-N-(prop-2-yn-1-yl)pyrimidin-4-amine **R3**

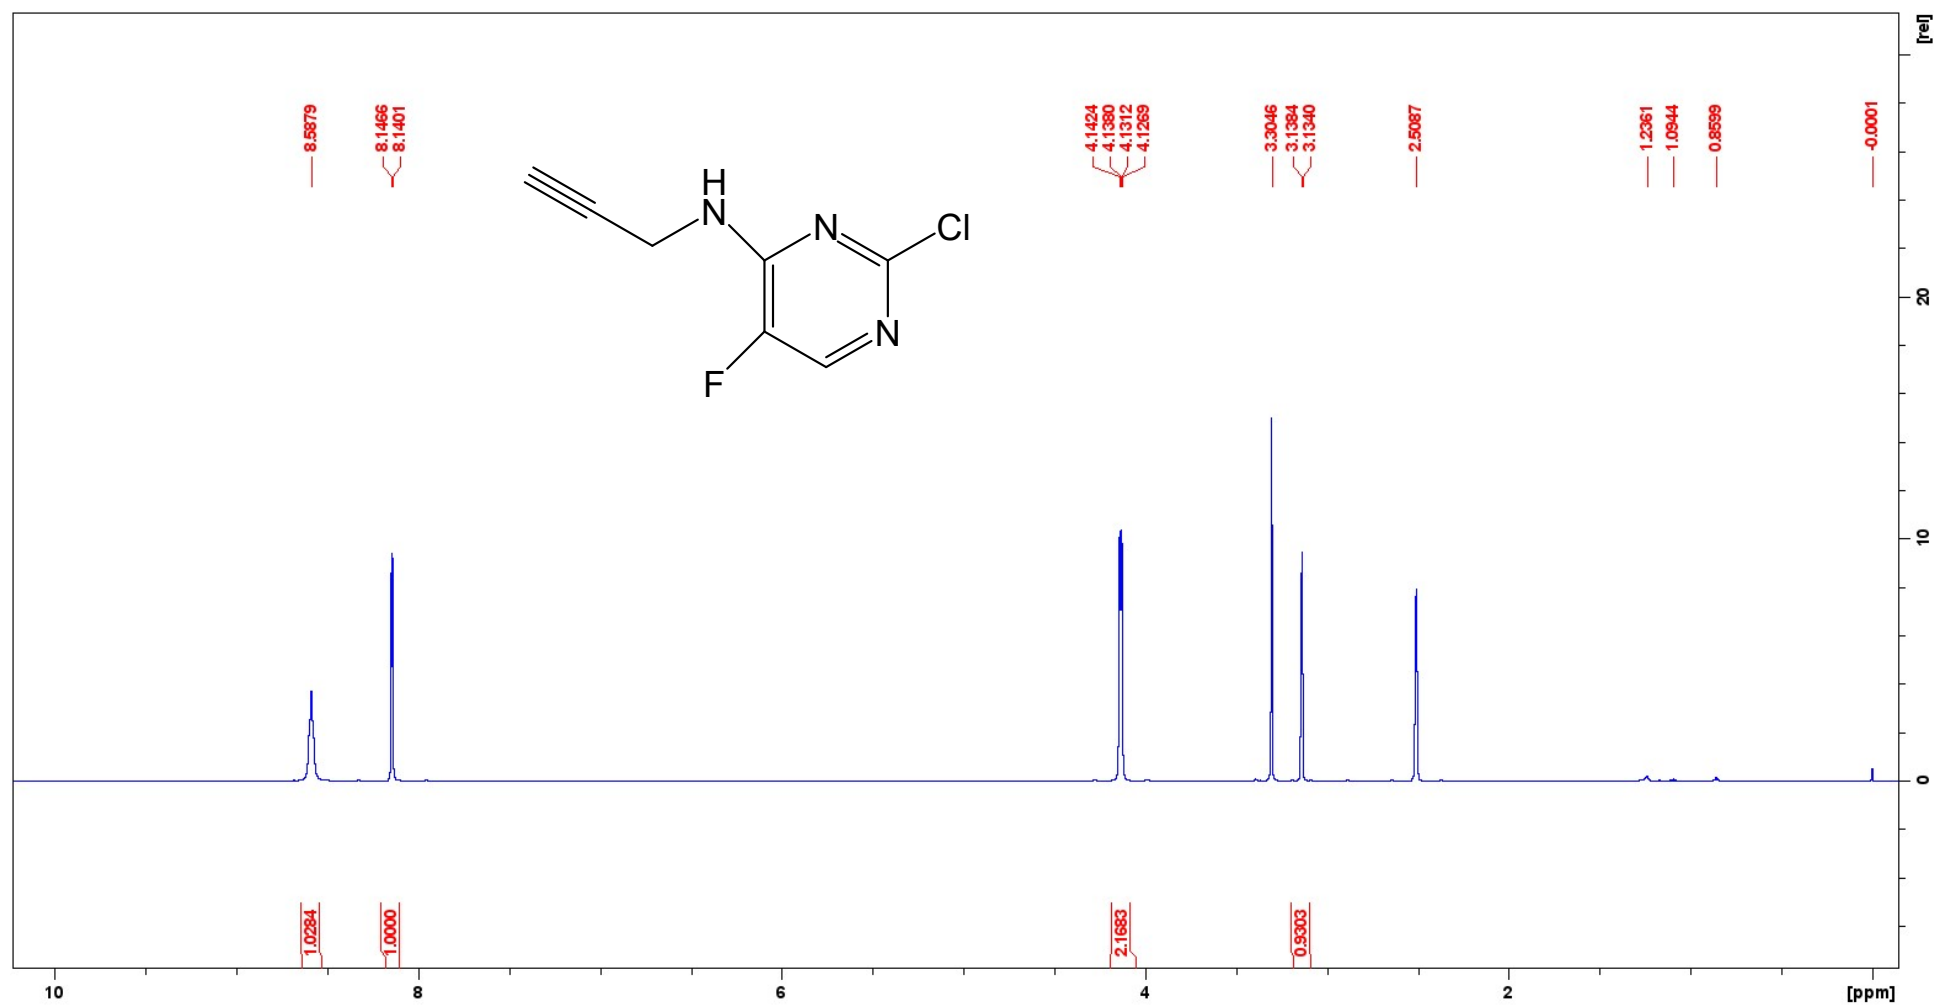

$^{13}\text{C}\{^1\text{H}\}$  J-MOD NMR (125 MHz) of 2-Chloro-5-fluoro-N-(prop-2-yn-1-yl)pyrimidin-4-amine **R3**

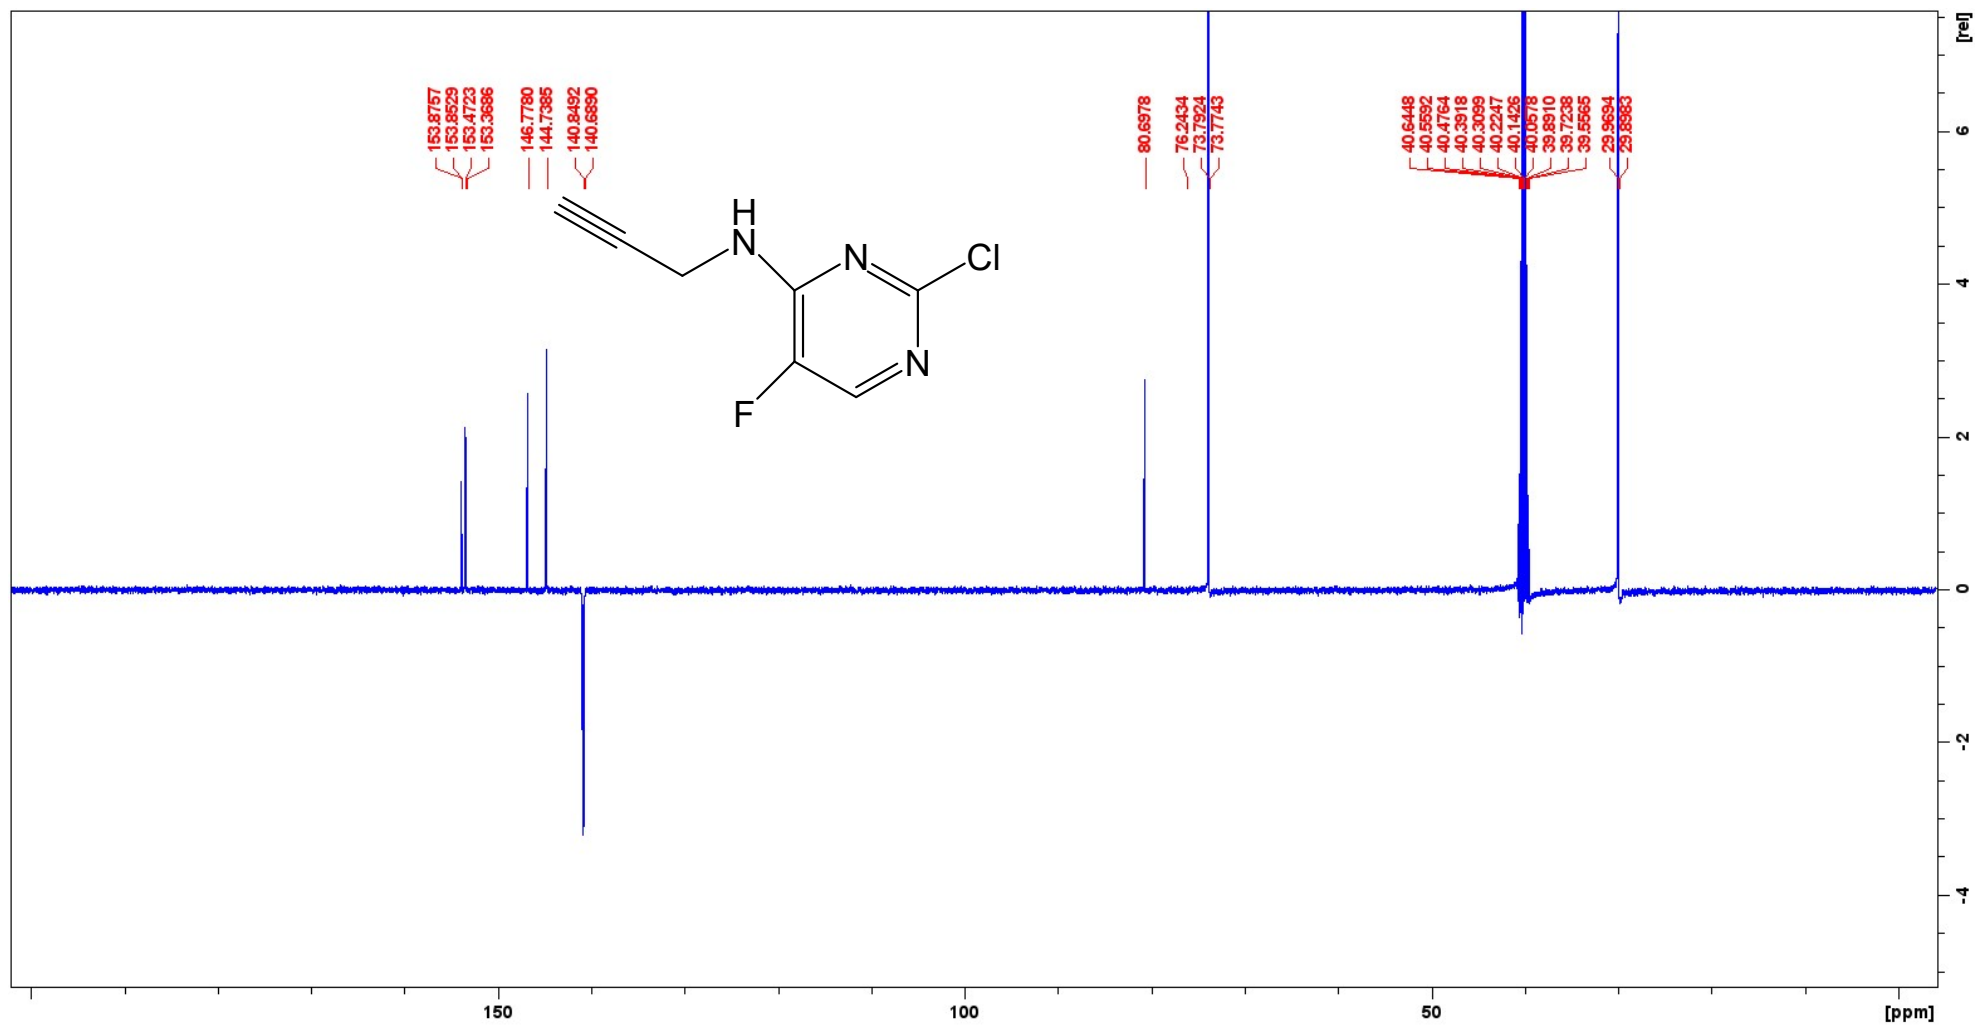



<sup>19</sup>F J-MOD NMR (470 MHz) of 2-Chloro-5-fluoro-N-(prop-2-yn-1-yl)pyrimidin-4-amine **R3**

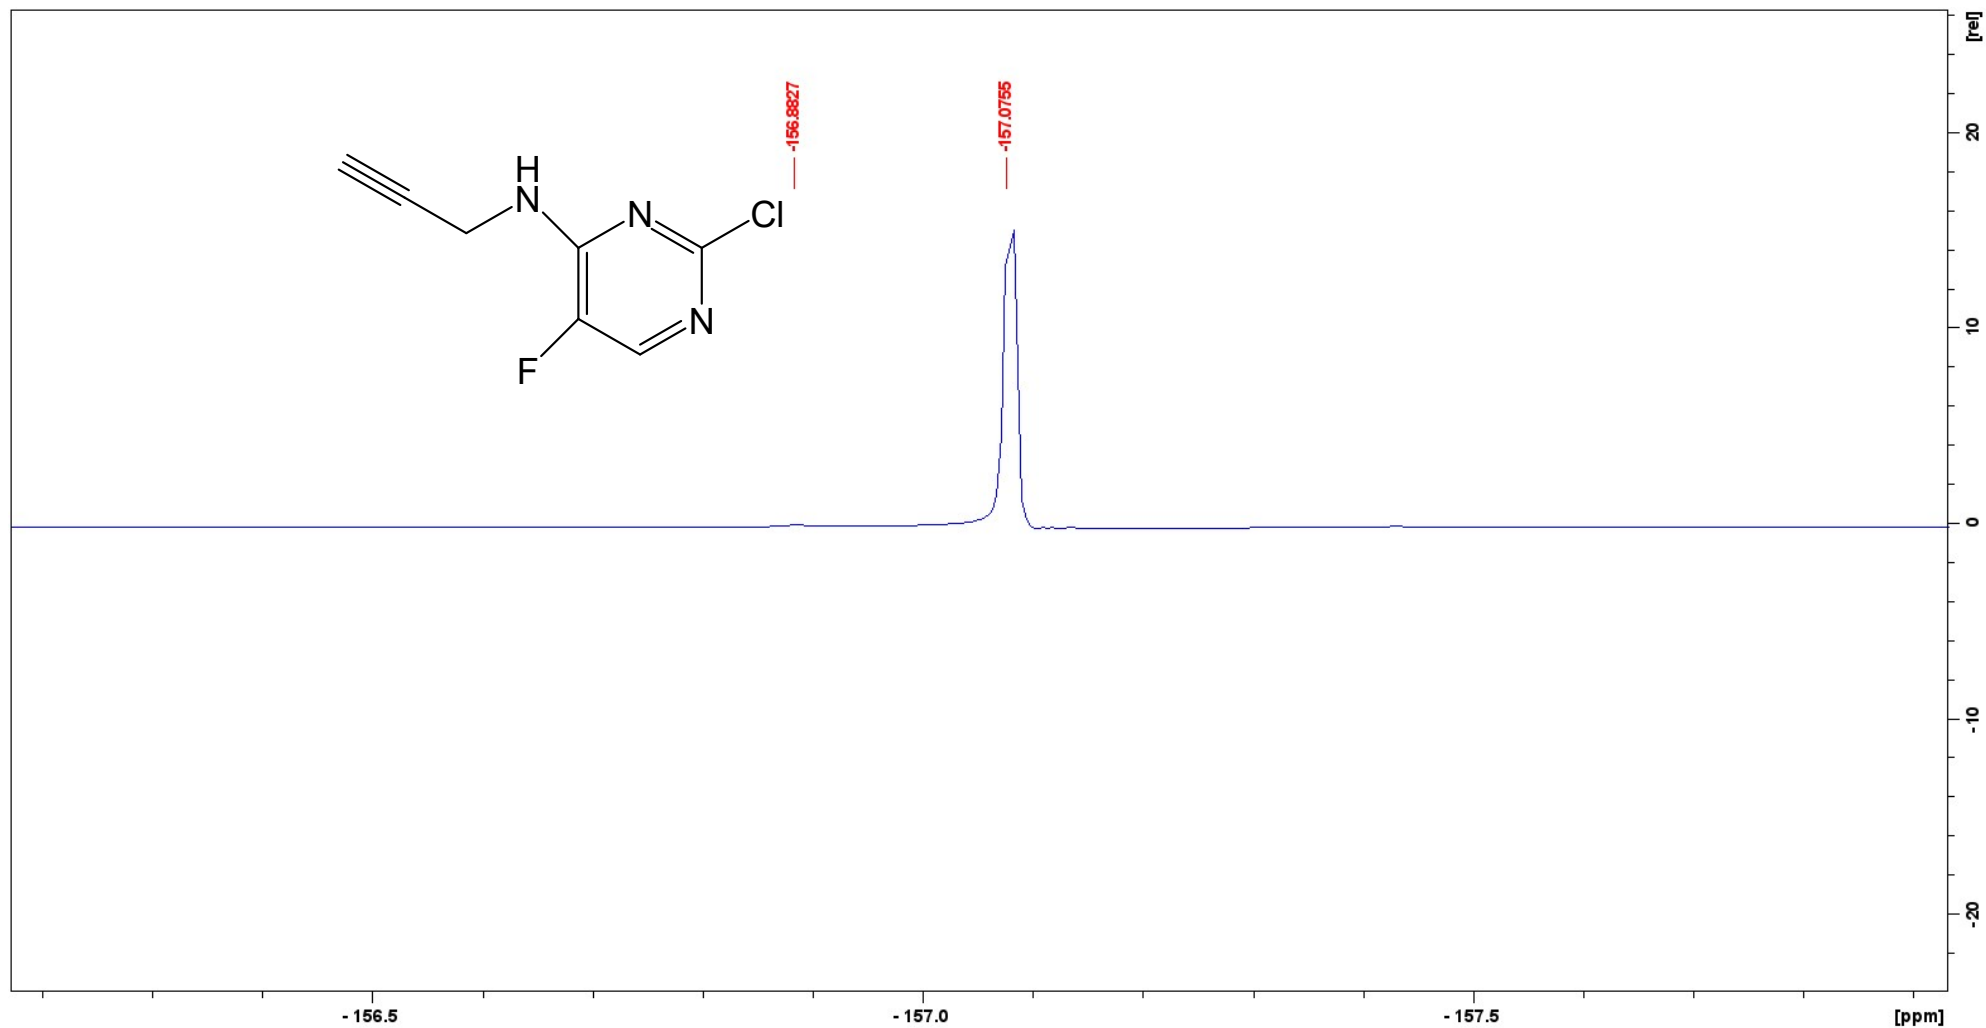

<sup>1</sup>H-NMR (500 MHz) of 2,5-Dichloro-N-(prop-2-yn-1-yl)pyrimidin-4-amine **R4**

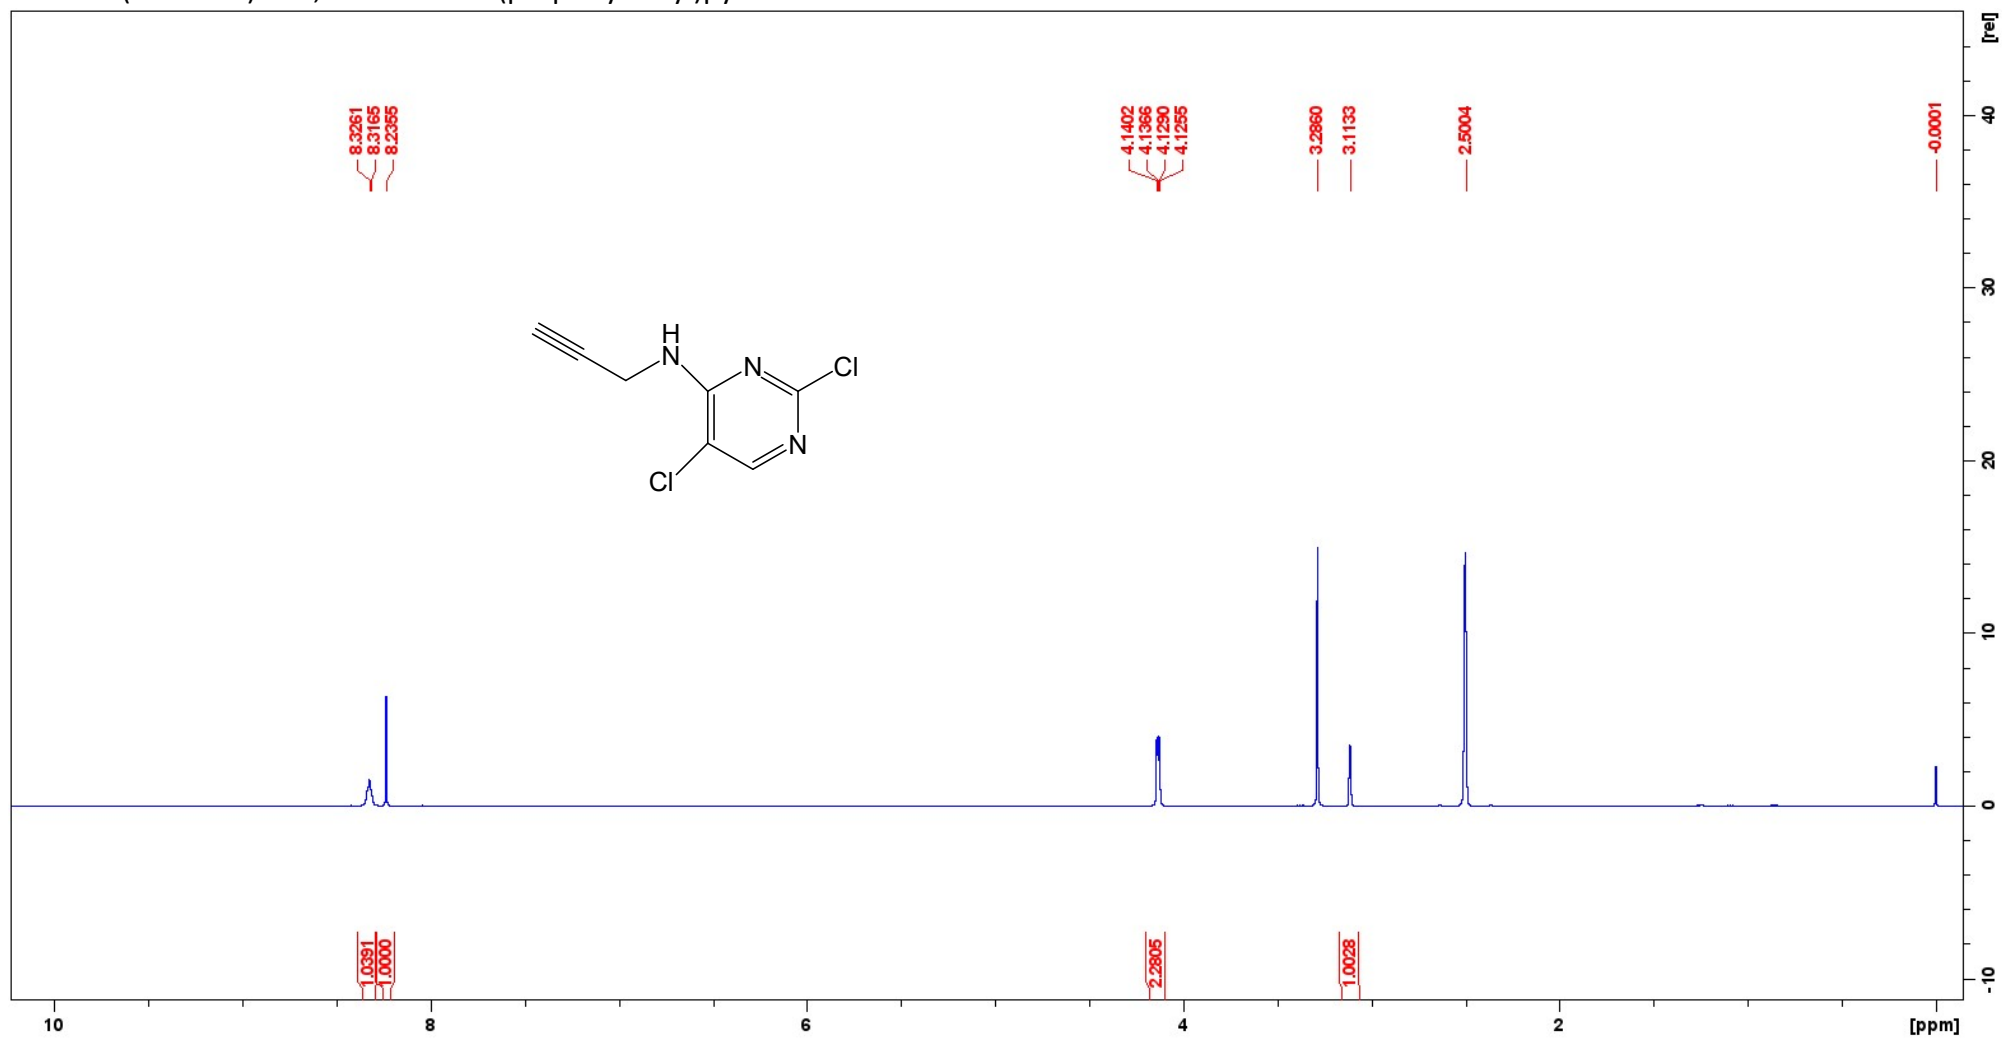

$^{13}\text{C}\{^1\text{H}\}$  J-MOD NMR (125 MHz) of 2,5-Dichloro-N-(prop-2-yn-1-yl)pyrimidin-4-amine **R4**

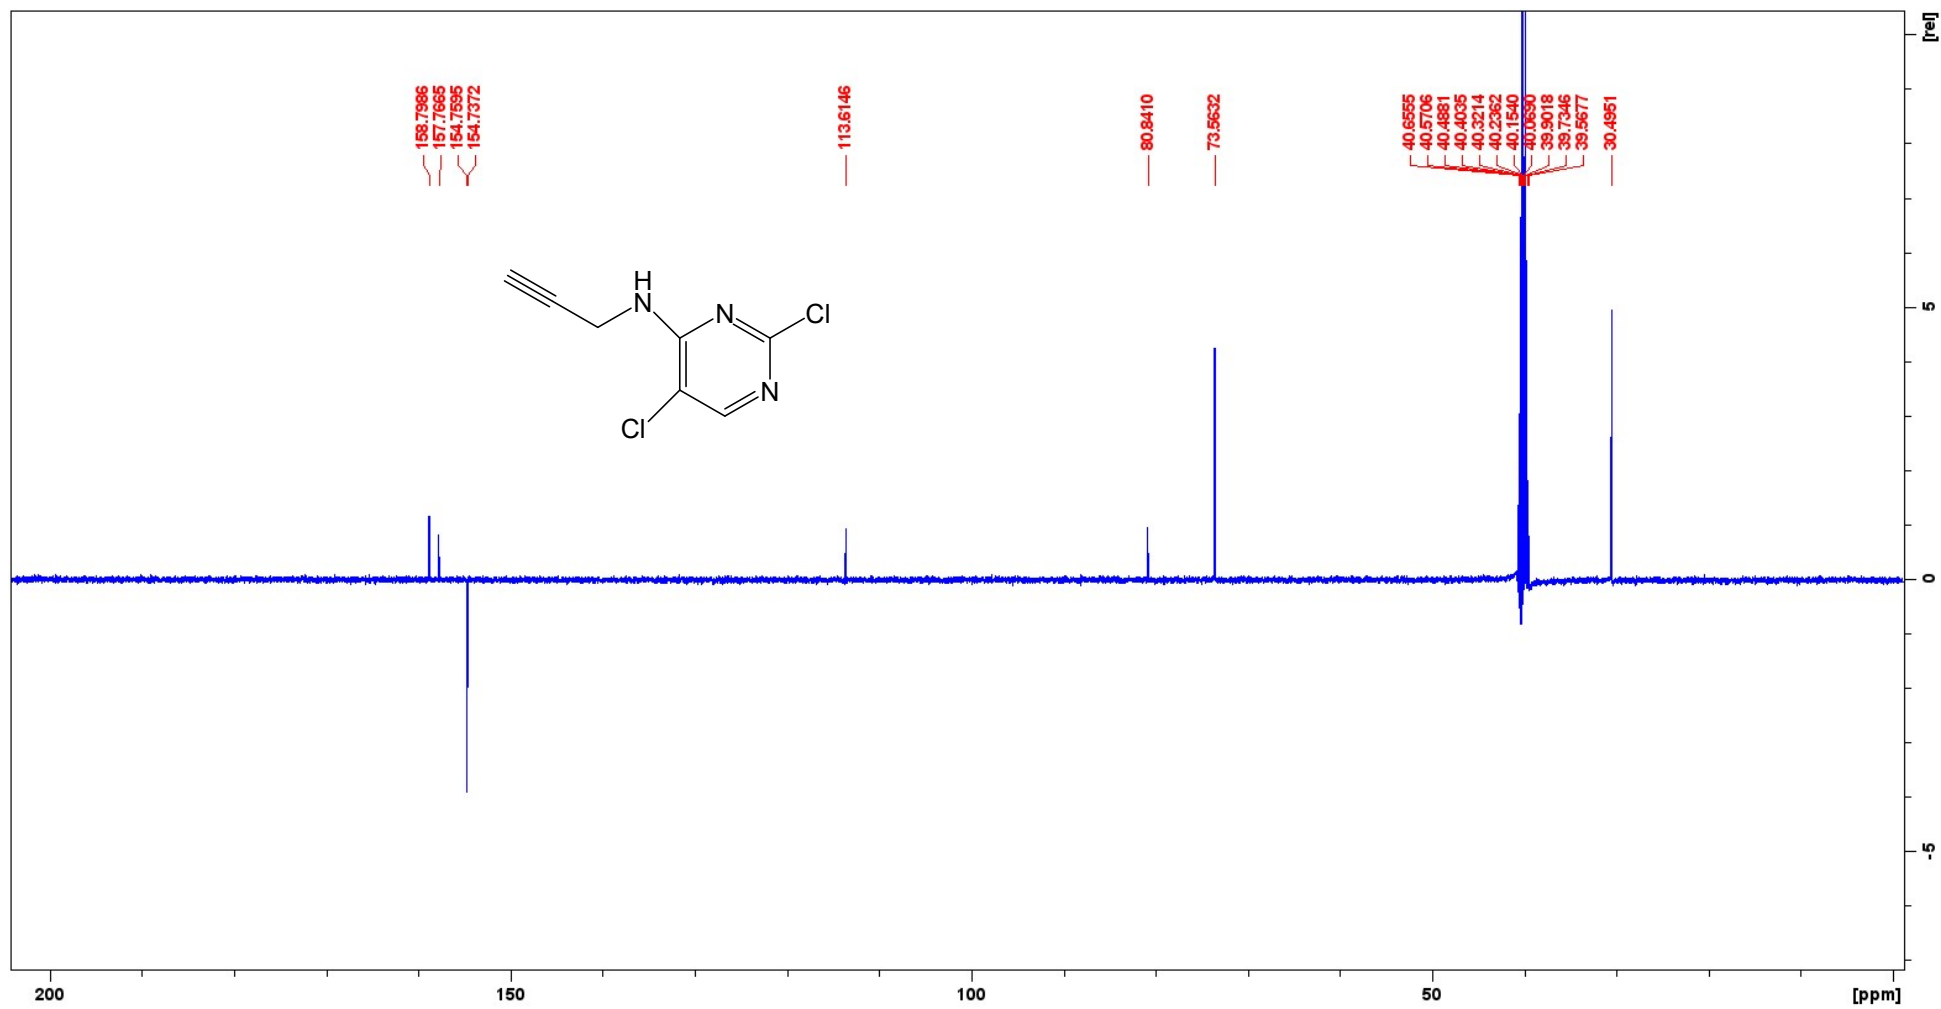

<sup>1</sup>H-NMR (500 MHz) of 5-Fluoro-N<sup>4</sup>-(prop-2-yn-1-yl)-N<sup>2</sup>-(4-(trifluoromethyl)phenyl)pyrimidine-2,4-diamine **R5**

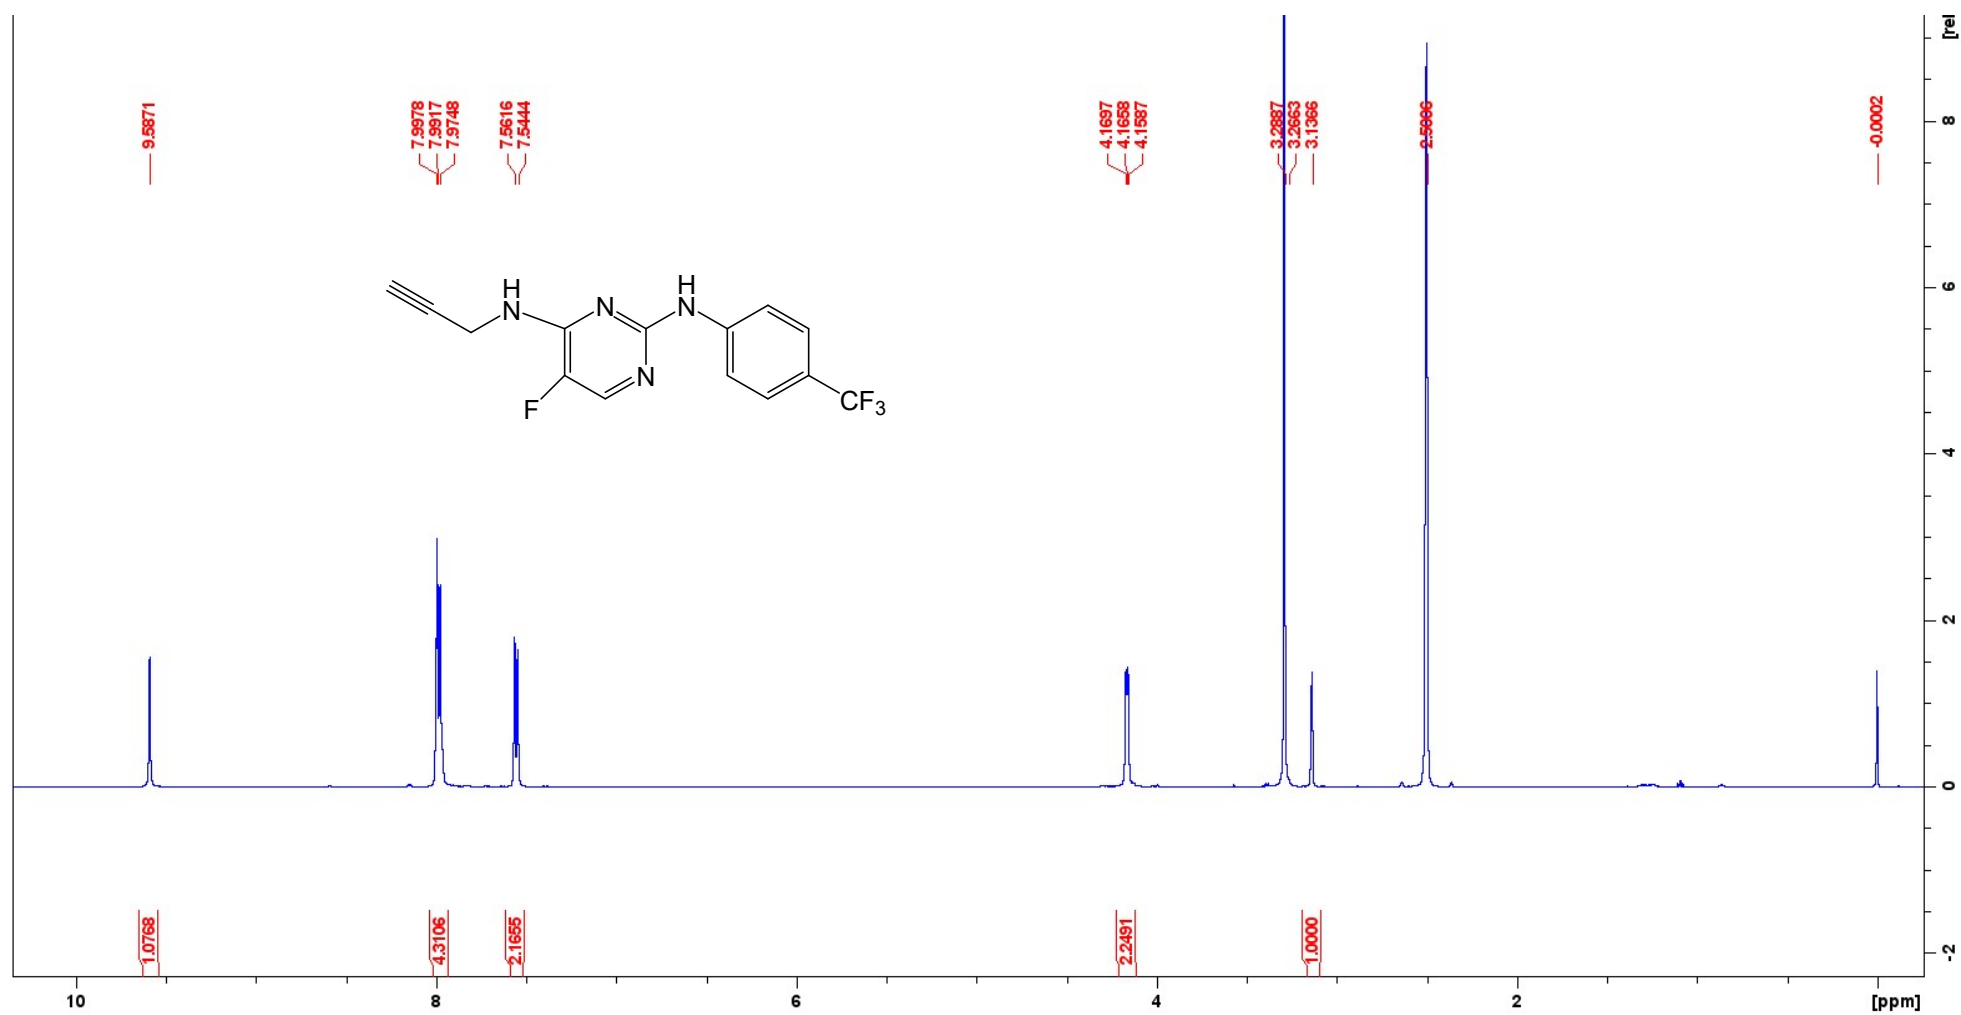

$^{13}\text{C}\{^1\text{H}\}$  J-MOD NMR (125 MHz) of 5-Fluoro-*N*<sup>4</sup>-(prop-2-yn-1-yl)-*N*<sup>2</sup>-(4-(trifluoromethyl)phenyl)pyrimidine-2,4-diamine **R5**

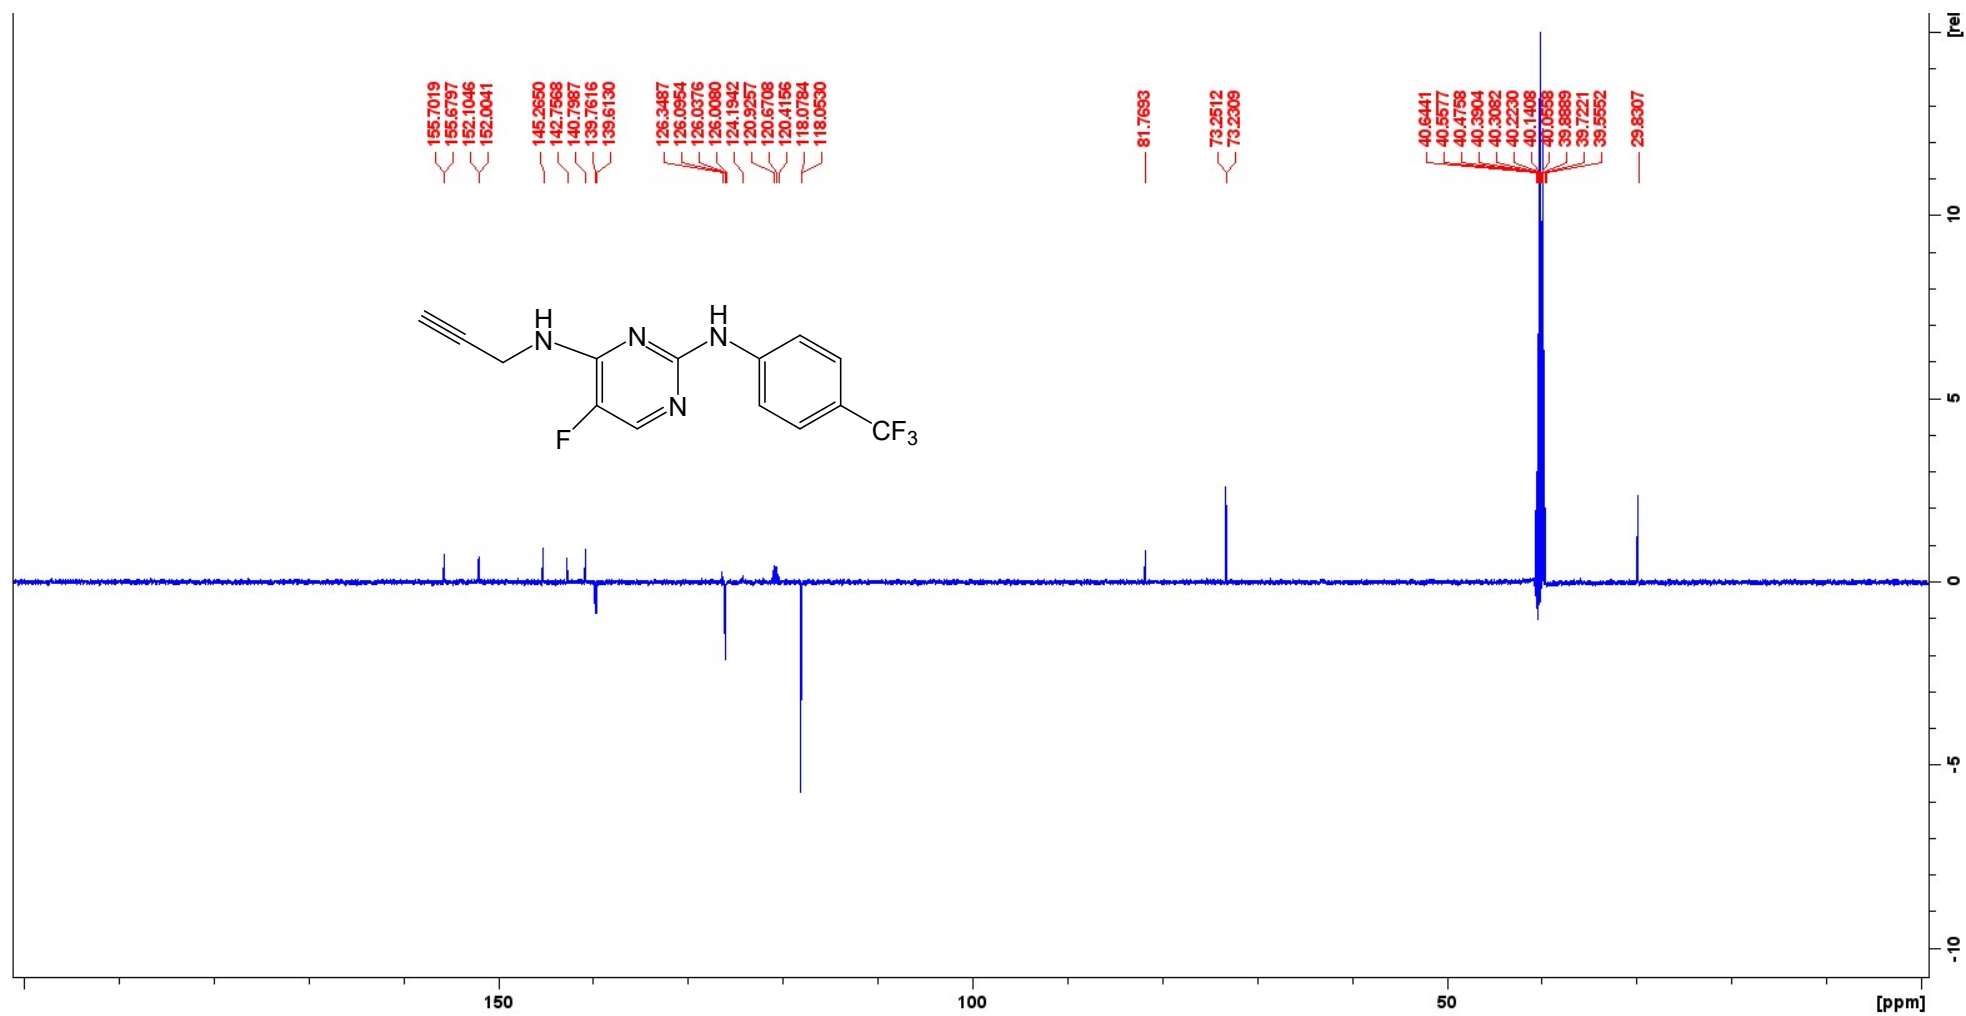

<sup>19</sup>F J-MOD NMR (470 MHz) of 5-Fluoro-N<sup>4</sup>-(prop-2-yn-1-yl)-N<sup>2</sup>-(4-(trifluoromethyl)phenyl)pyrimidine-2,4-diamine **R5**

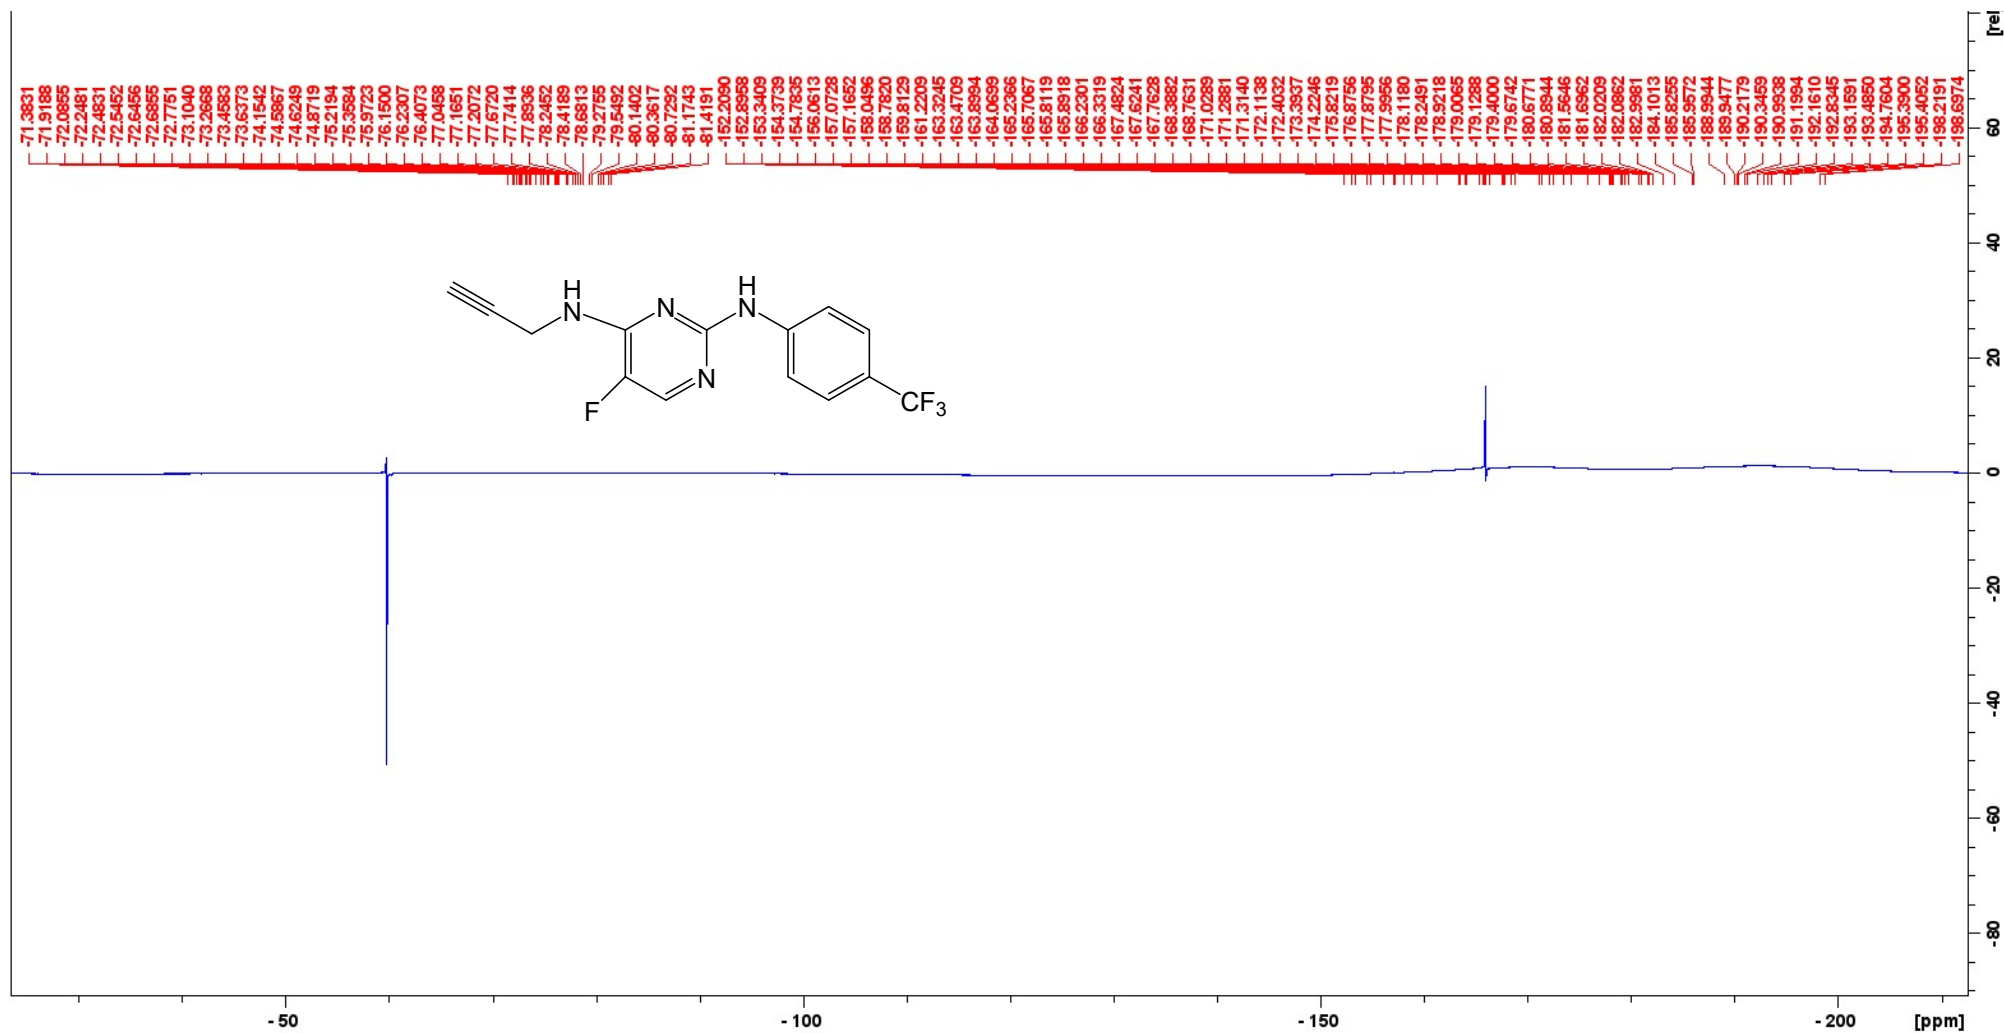

<sup>1</sup>H-NMR (500 MHz) of 5-Chloro-*N*<sup>4</sup>-(prop-2-yn-1-yl)-*N*<sup>2</sup>-(4-(trifluoromethyl)phenyl)pyrimidine-2,4-diamine **R6**

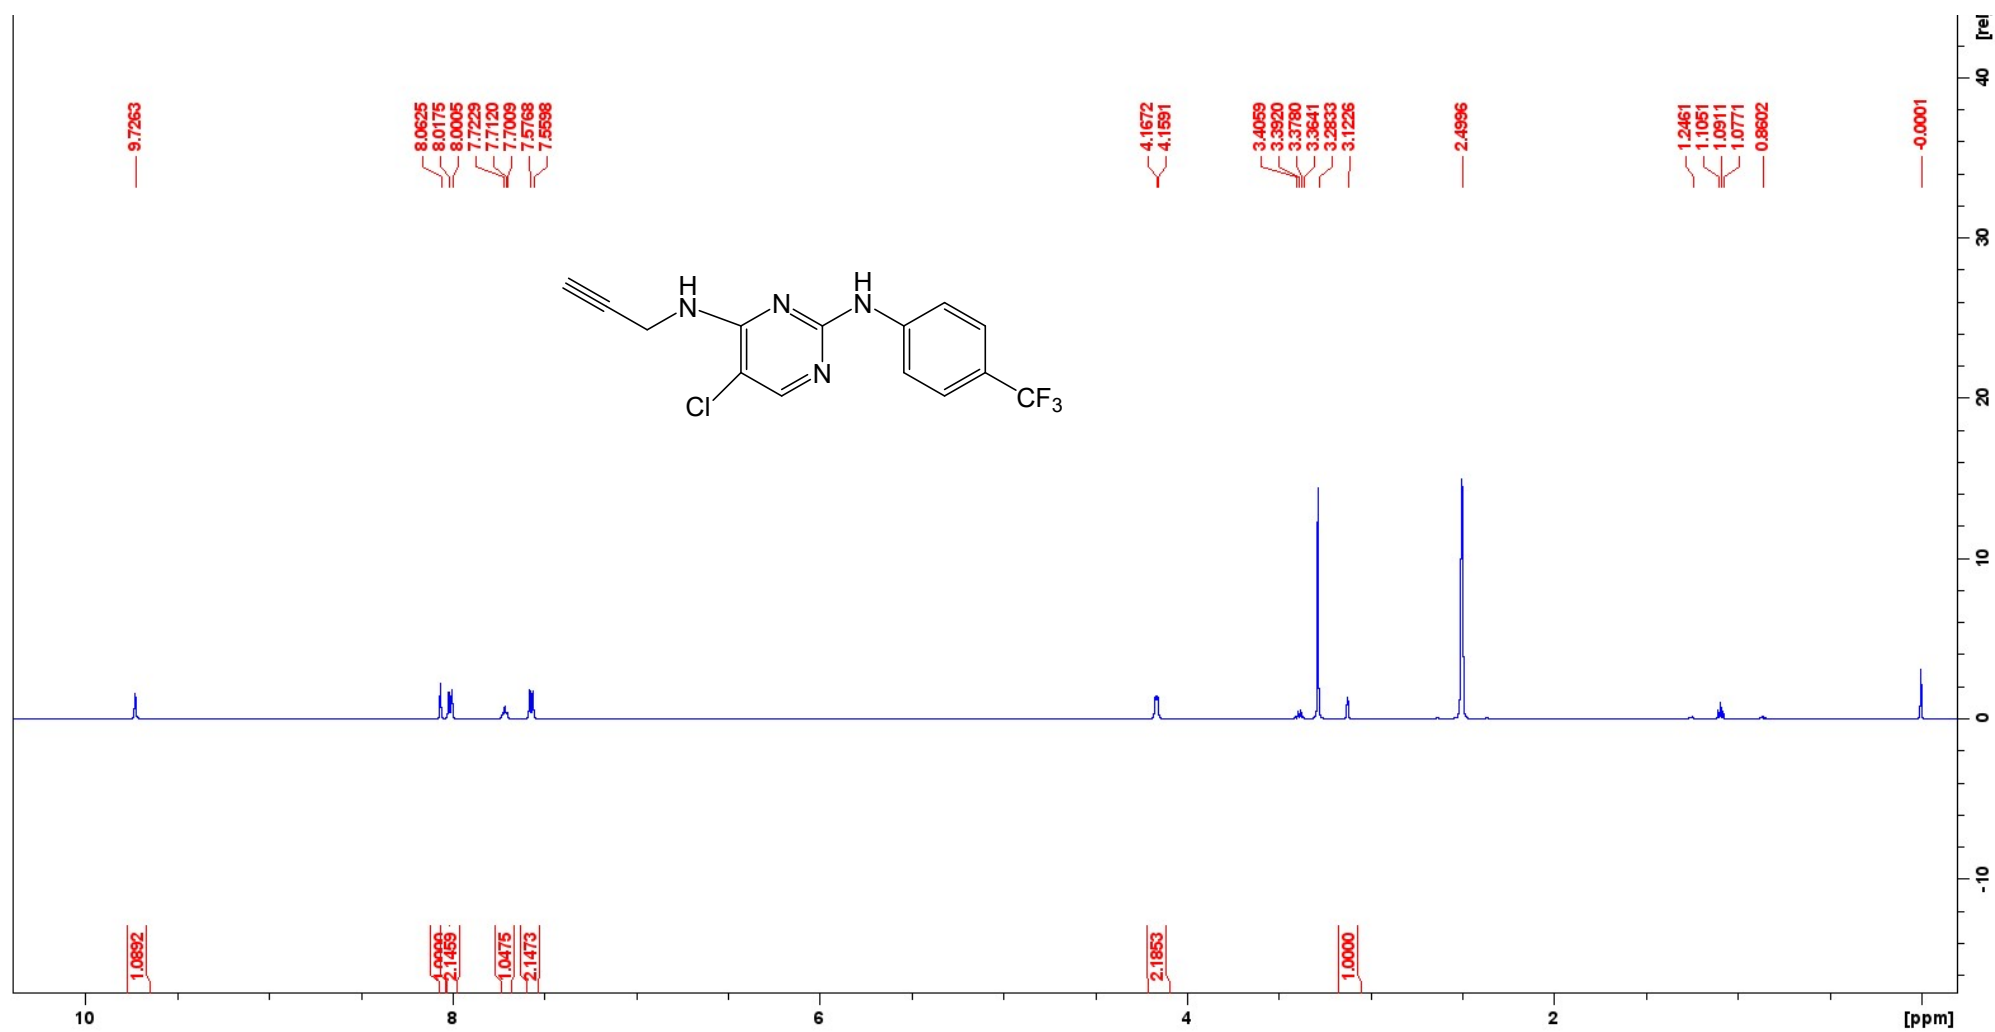

$^{13}\text{C}\{^1\text{H}\}$  J-MOD NMR (125 MHz) of 5-Chloro- $N^4$ -(prop-2-yn-1-yl)- $N^2$ -(4-(trifluoromethyl)phenyl)pyrimidine-2,4-diamine **R6**

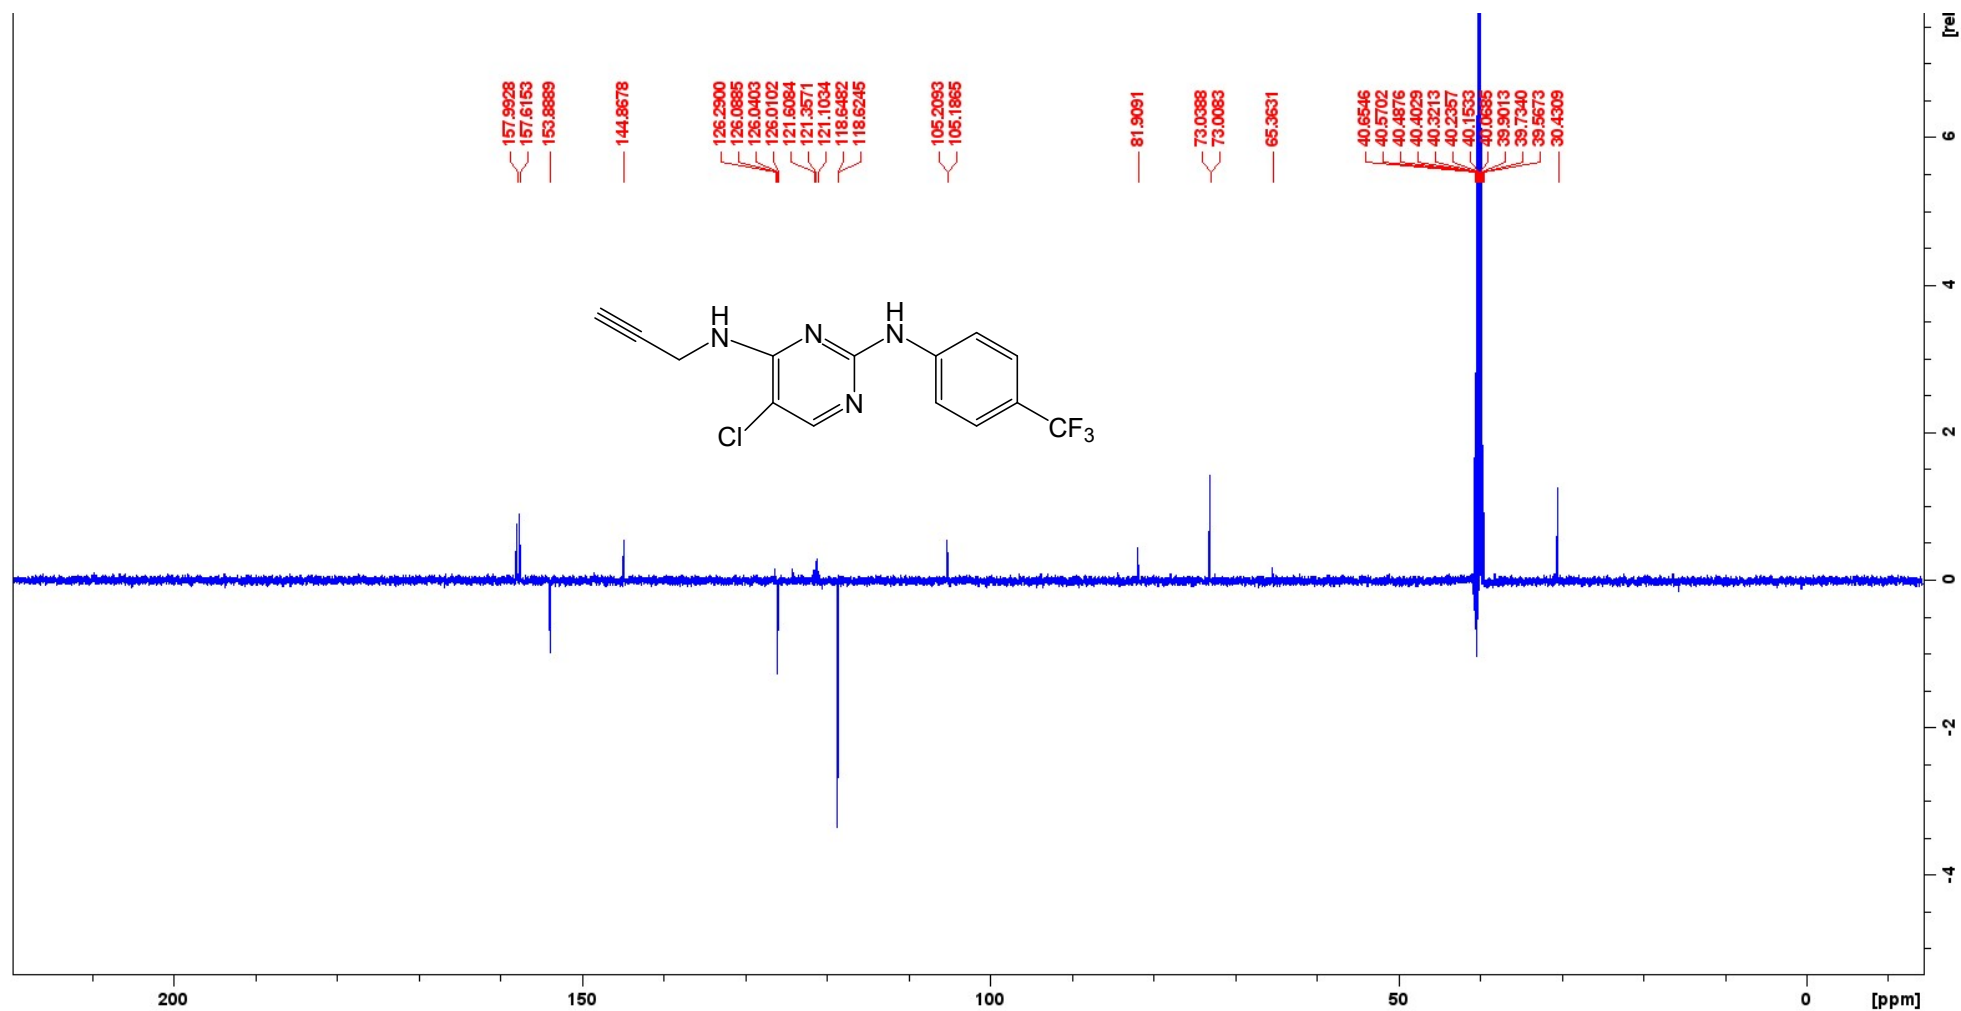



<sup>19</sup>F J-MOD NMR (470 MHz) of 5-Chloro-N<sup>4</sup>-(prop-2-yn-1-yl)-N<sup>2</sup>-(4-(trifluoromethyl)phenyl)pyrimidine-2,4-diamine **R6**

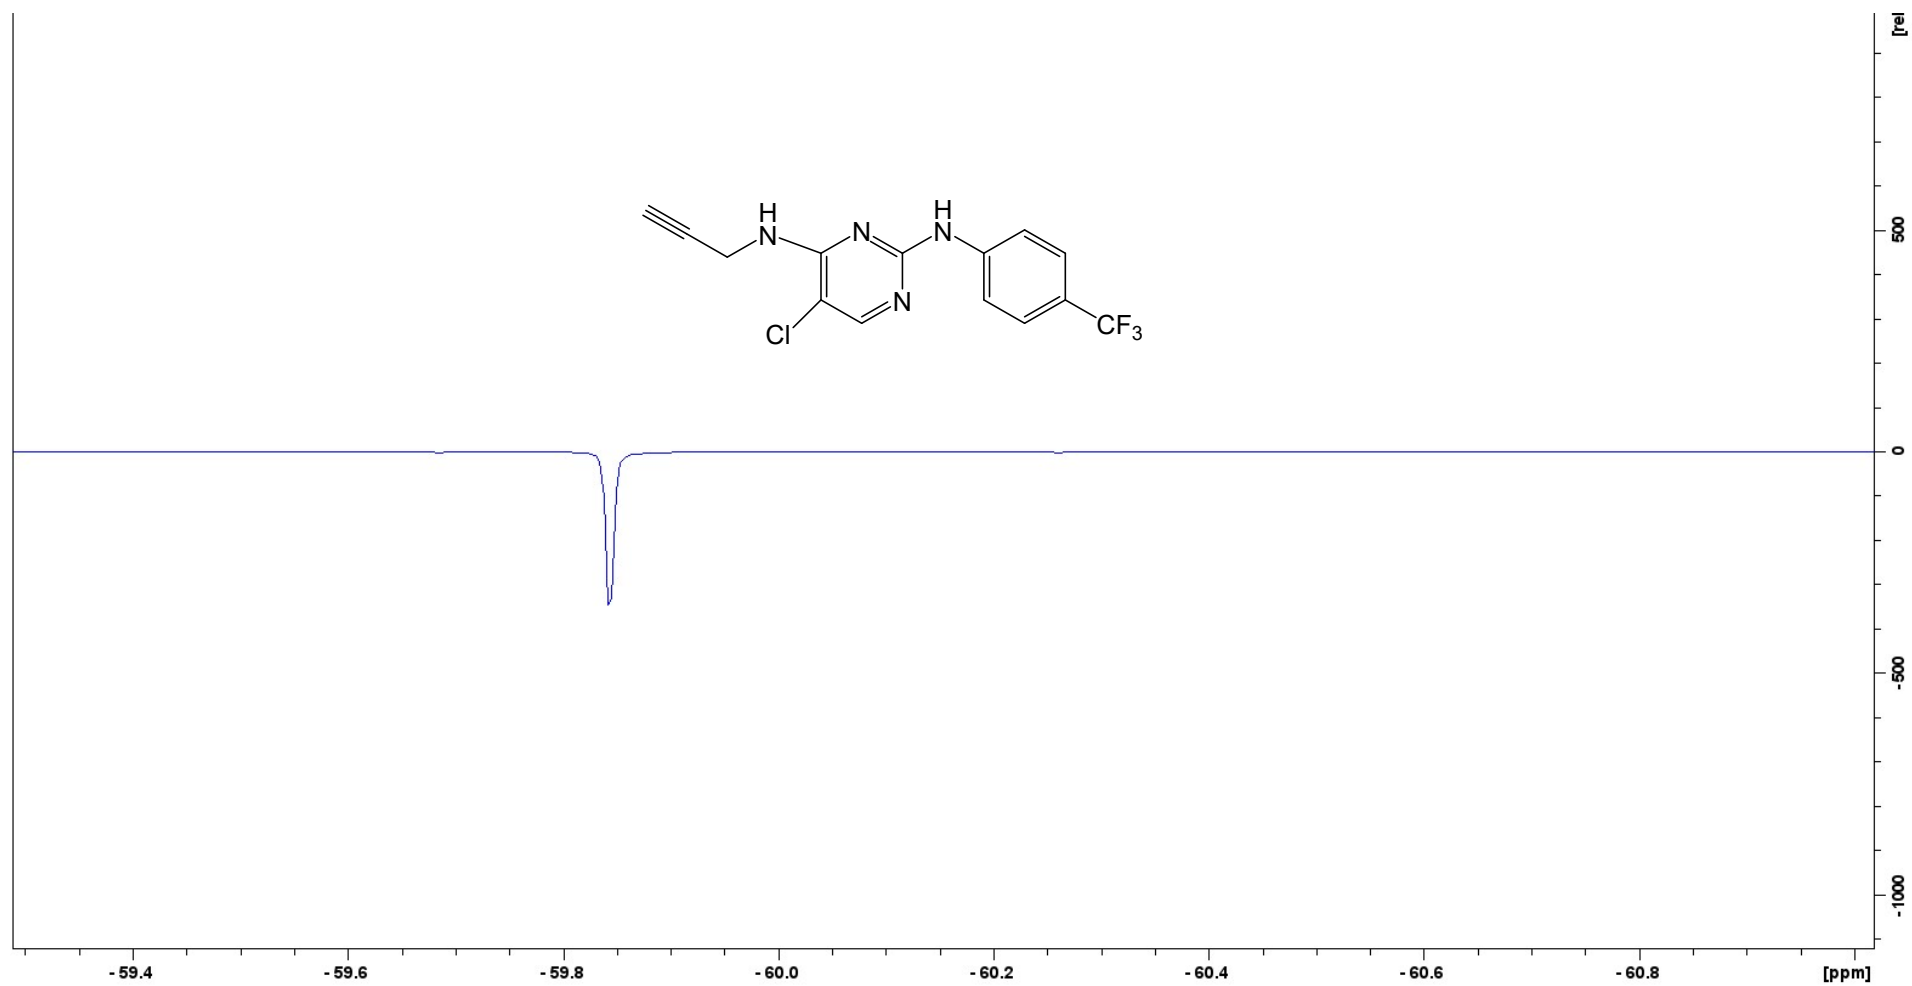

<sup>1</sup>H-NMR (500 MHz) of 5-Fluoro-N<sup>2</sup>-(1-methyl-1H-pyrazol-4-yl)-N<sup>4</sup>-(prop-2-yn-1-yl)pyrimidine-2,4-diamine **R7**

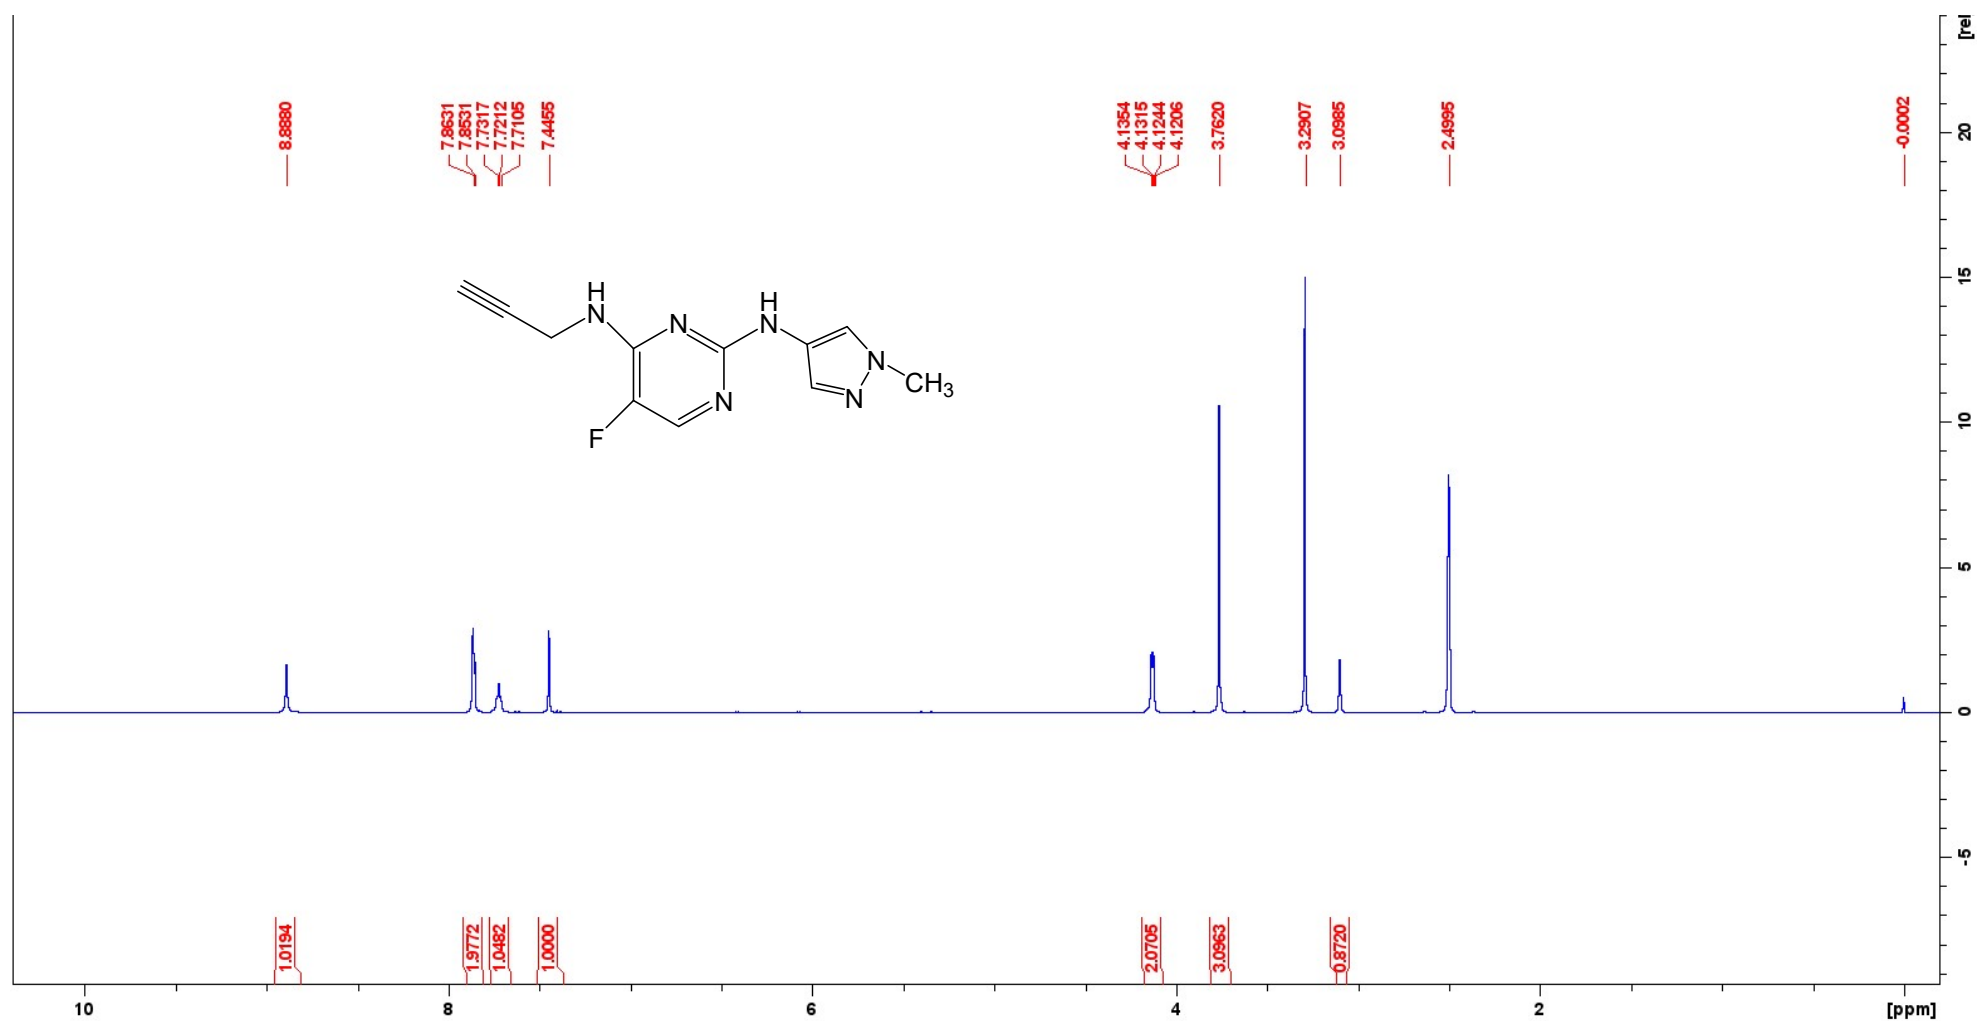

$^{13}\text{C}\{^1\text{H}\}$  J-MOD NMR (125 MHz) of 5-Fluoro- $N^2$ -(1-methyl-1H-pyrazol-4-yl)- $N^4$ -(prop-2-yn-1-yl)pyrimidine-2,4-diamine **R7**

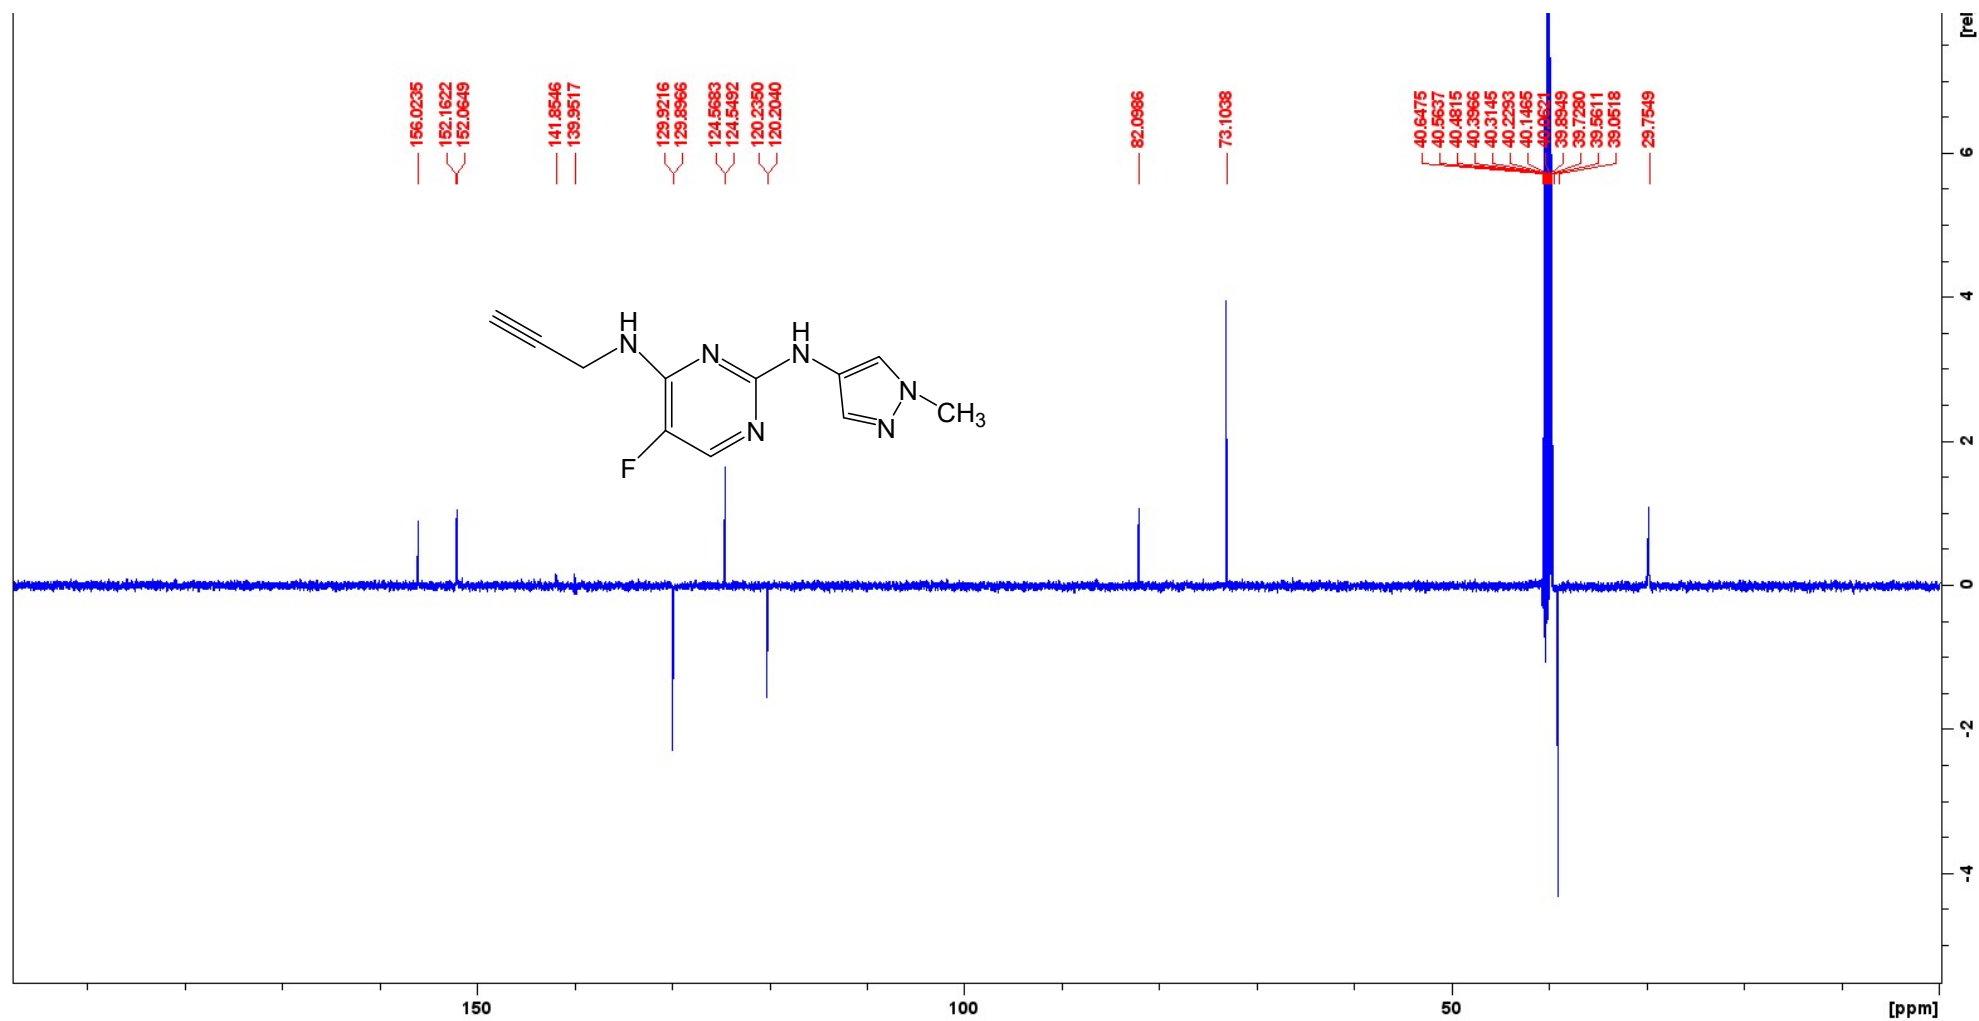

<sup>19</sup>F J-MOD NMR (470 MHz) of 5-Fluoro-N<sup>2</sup>-(1-methyl-1H-pyrazol-4-yl)-N<sup>4</sup>-(prop-2-yn-1-yl)pyrimidine-2,4-diamine **R7**

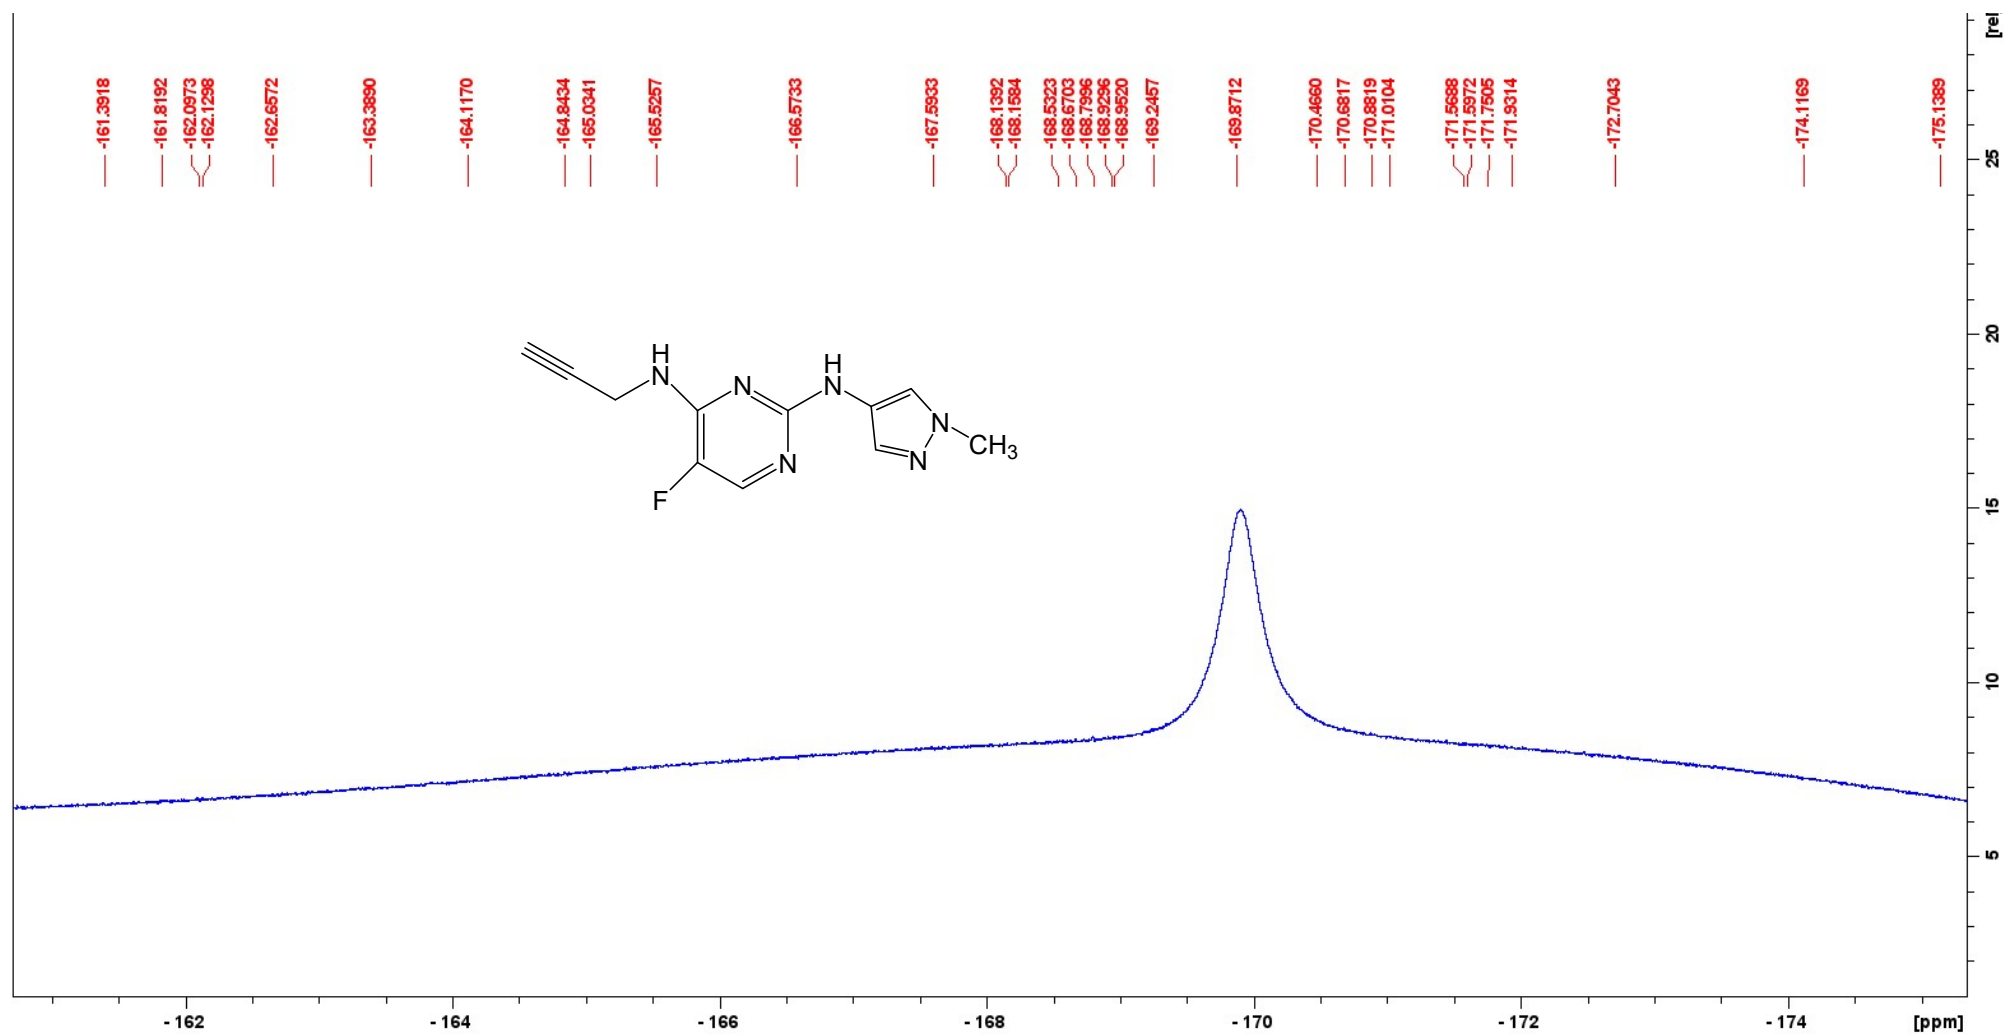

<sup>1</sup>H-NMR (500 MHz) of 5-Chloro-*N*<sup>2</sup>-(1-methyl-1*H*-pyrazol-4-yl)-*N*<sup>4</sup>-(prop-2-yn-1-yl)pyrimidine-2,4-diamine **R8**

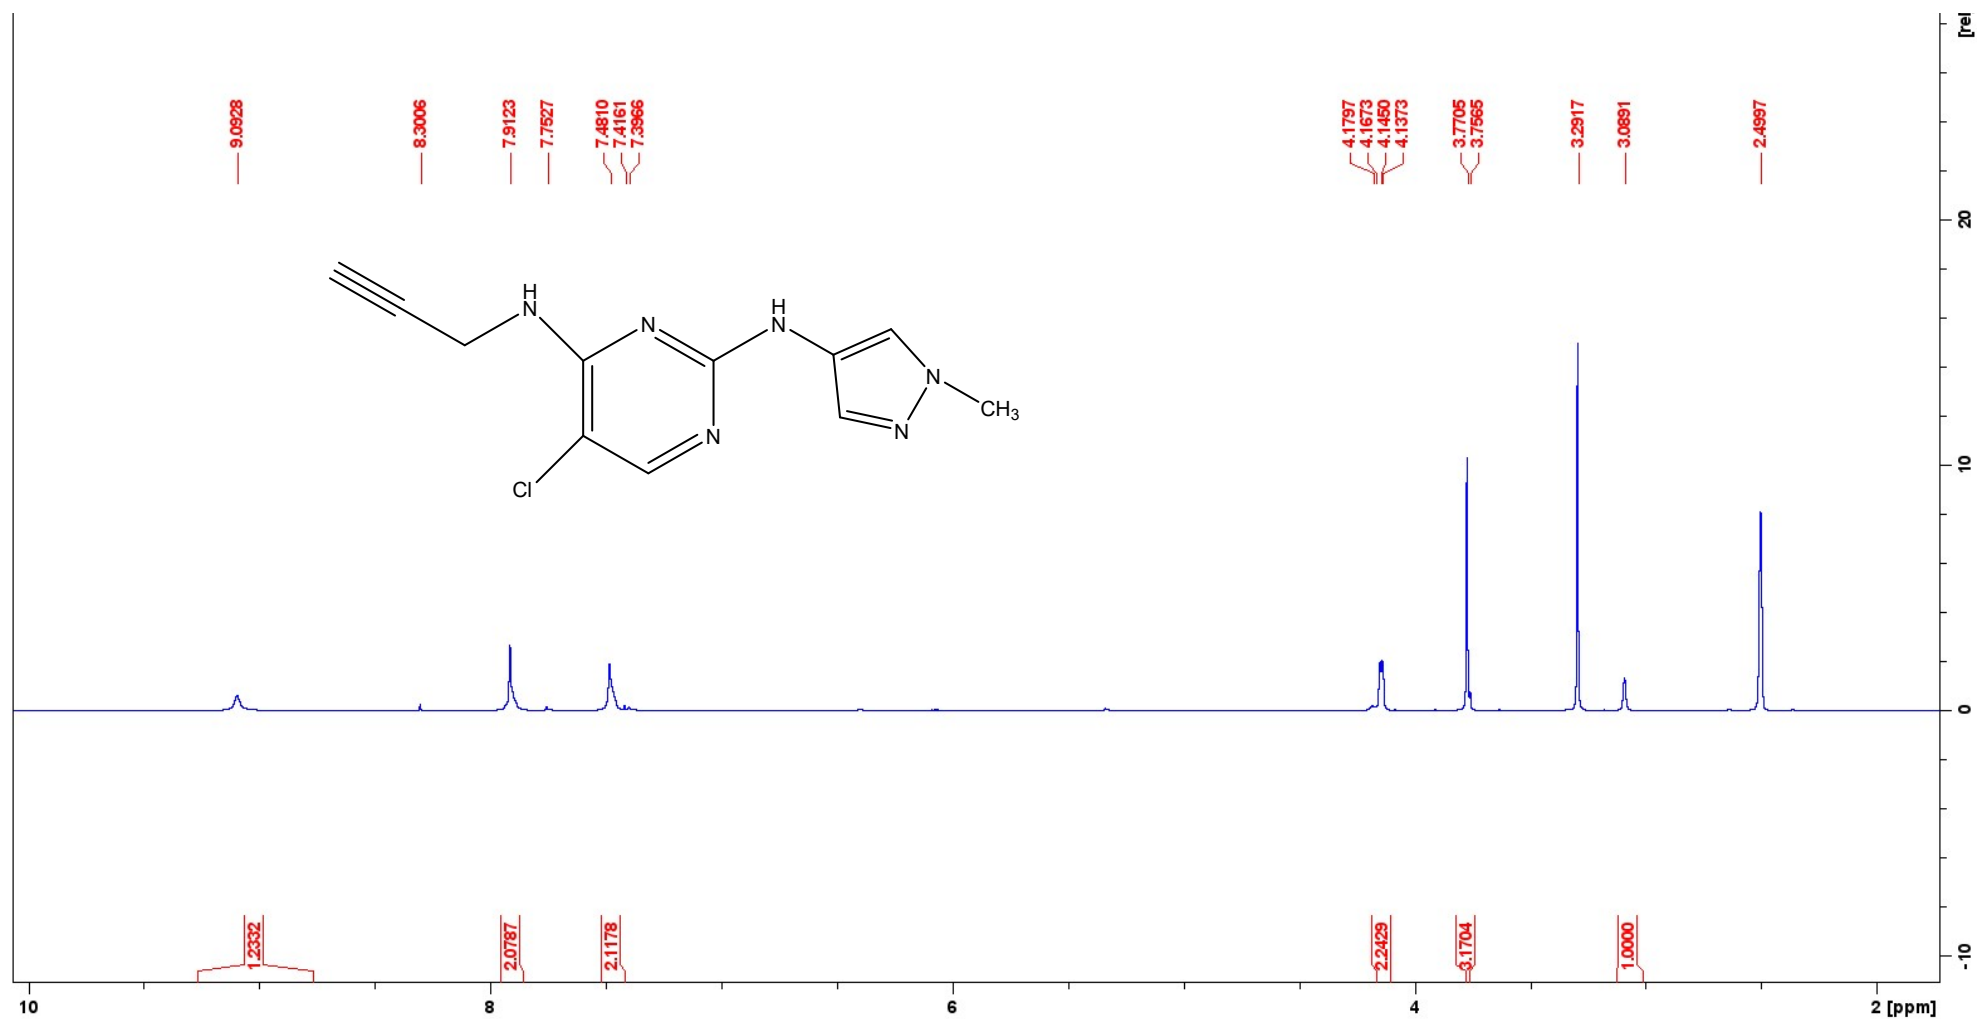

$^{13}\text{C}\{^1\text{H}\}$  J-MOD NMR (125 MHz) of 5-Chloro-*N*<sup>2</sup>-(1-methyl-1*H*-pyrazol-4-yl)-*N*<sup>4</sup>-(prop-2-yn-1-yl)pyrimidine-2,4-diamine **R8**

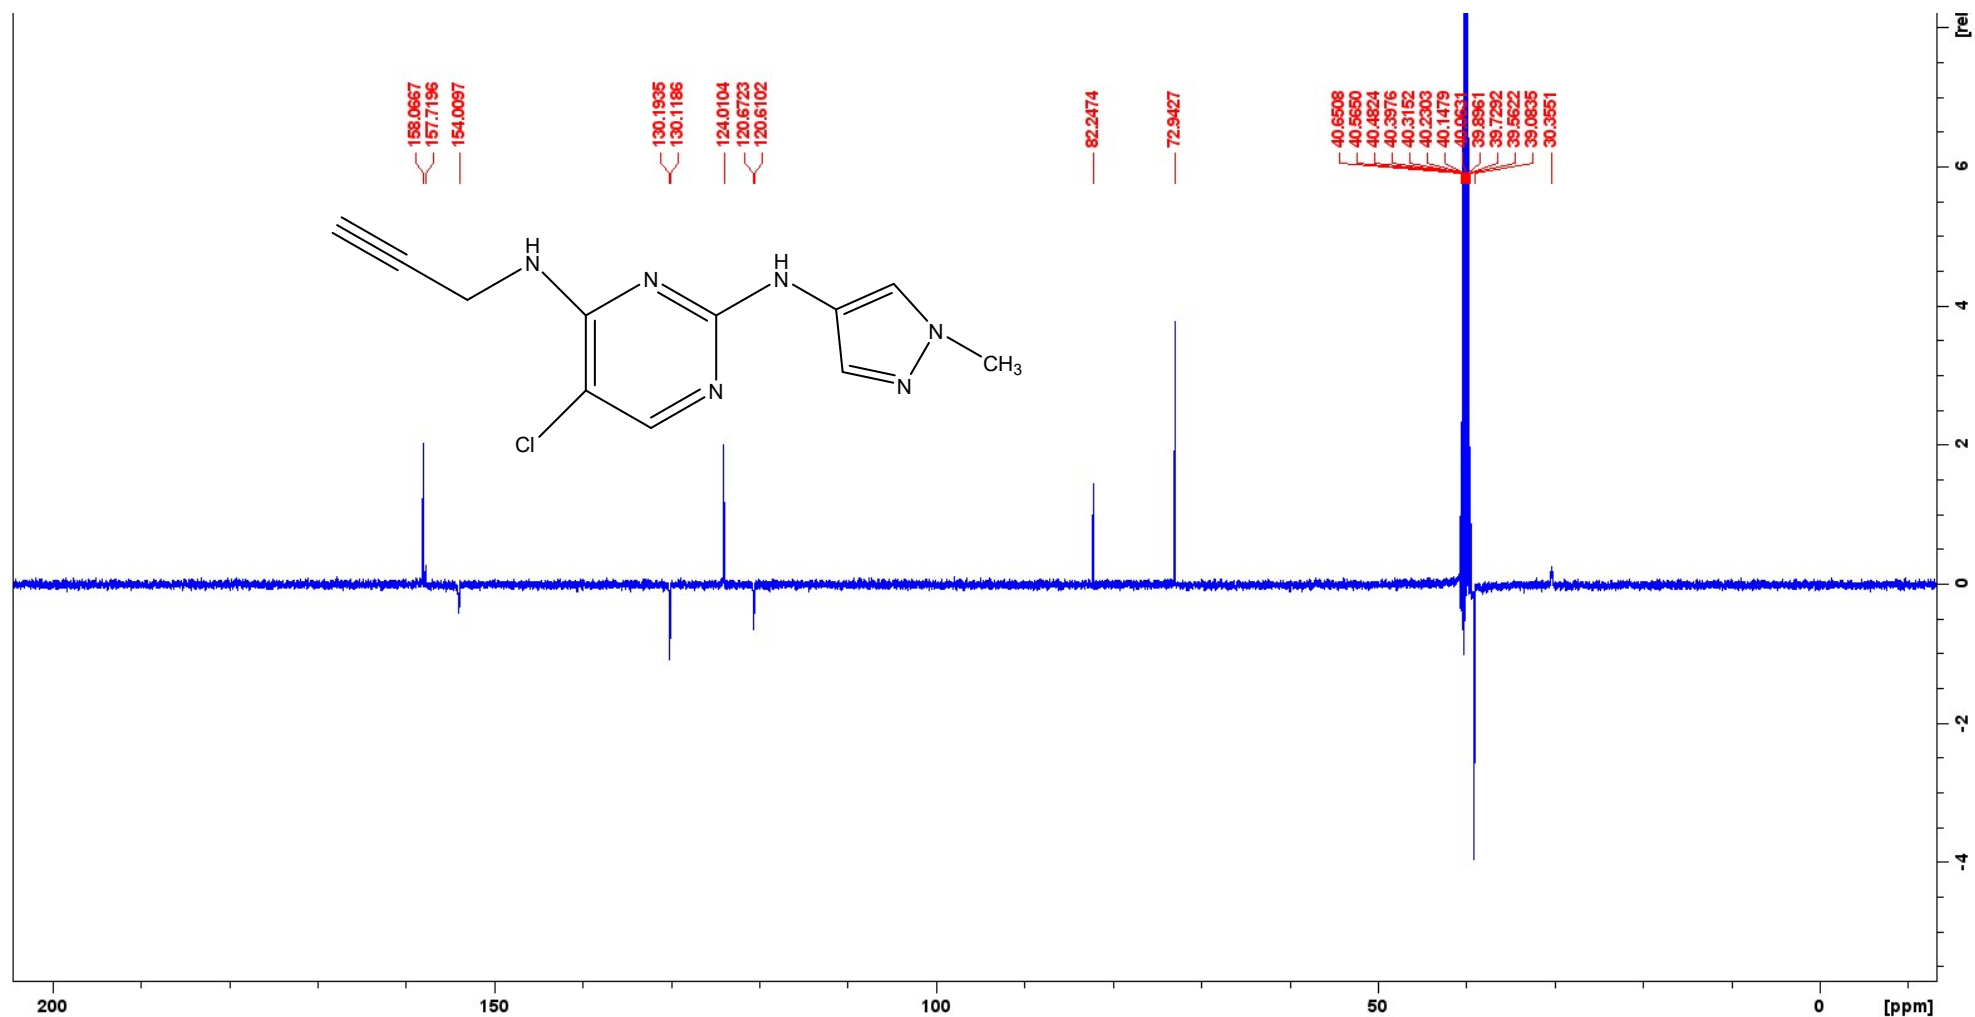

$^1\text{H-NMR}$  (500 MHz) of (4*bR*,7*S*,9*S*,9*aR*,10*S*)-10-(Hydroxymethyl)-1-methyl-8-methylene-4*b*,5,6,8,9,10-hexahydro-7*H*-7,9a-methanobenzo[*a*]azulene-7,9-diol **6**

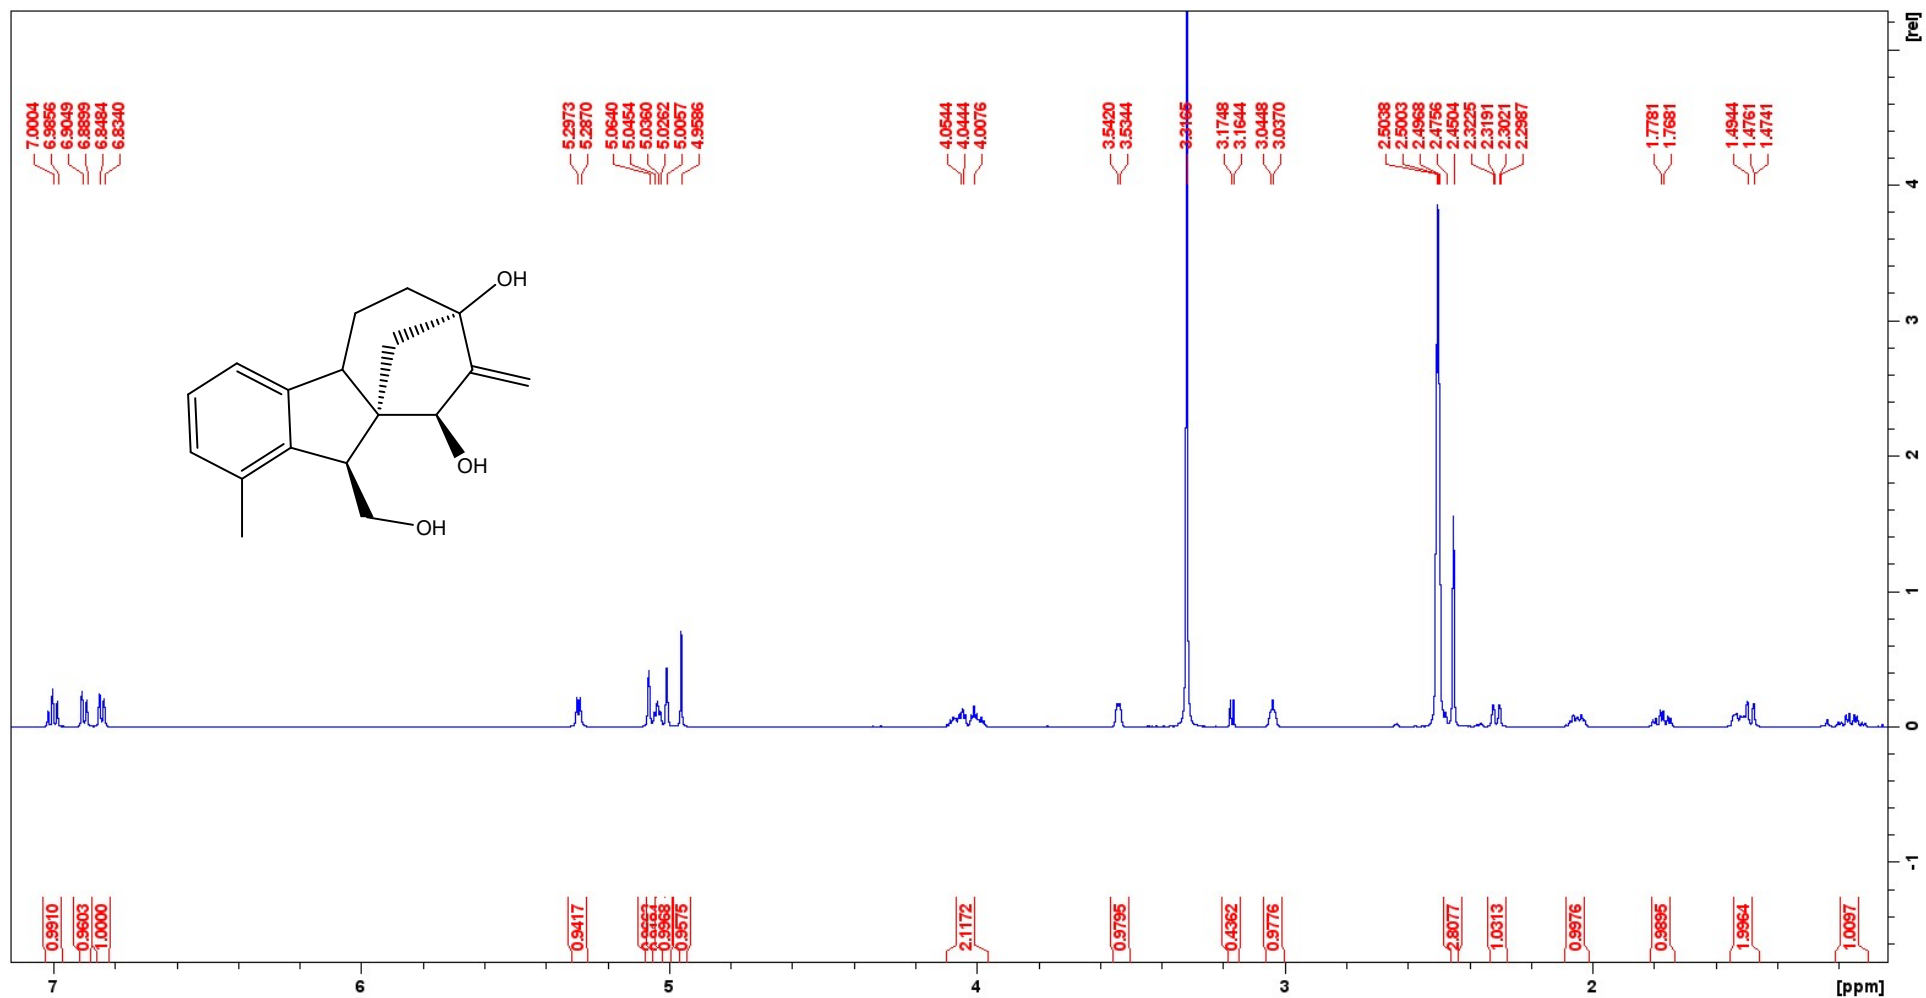

$^{13}\text{C}\{^1\text{H}\}$  J-MOD NMR (125 MHz) of (4*R*,7*S*,9*S*,9*aR*,10*S*)-10-(Hydroxymethyl)-1-methyl-8-methylene-4*b*,5,6,8,9,10-hexahydro-7*H*-7,9a-methanobenzo[*a*]azulene-7,9-diol **6**

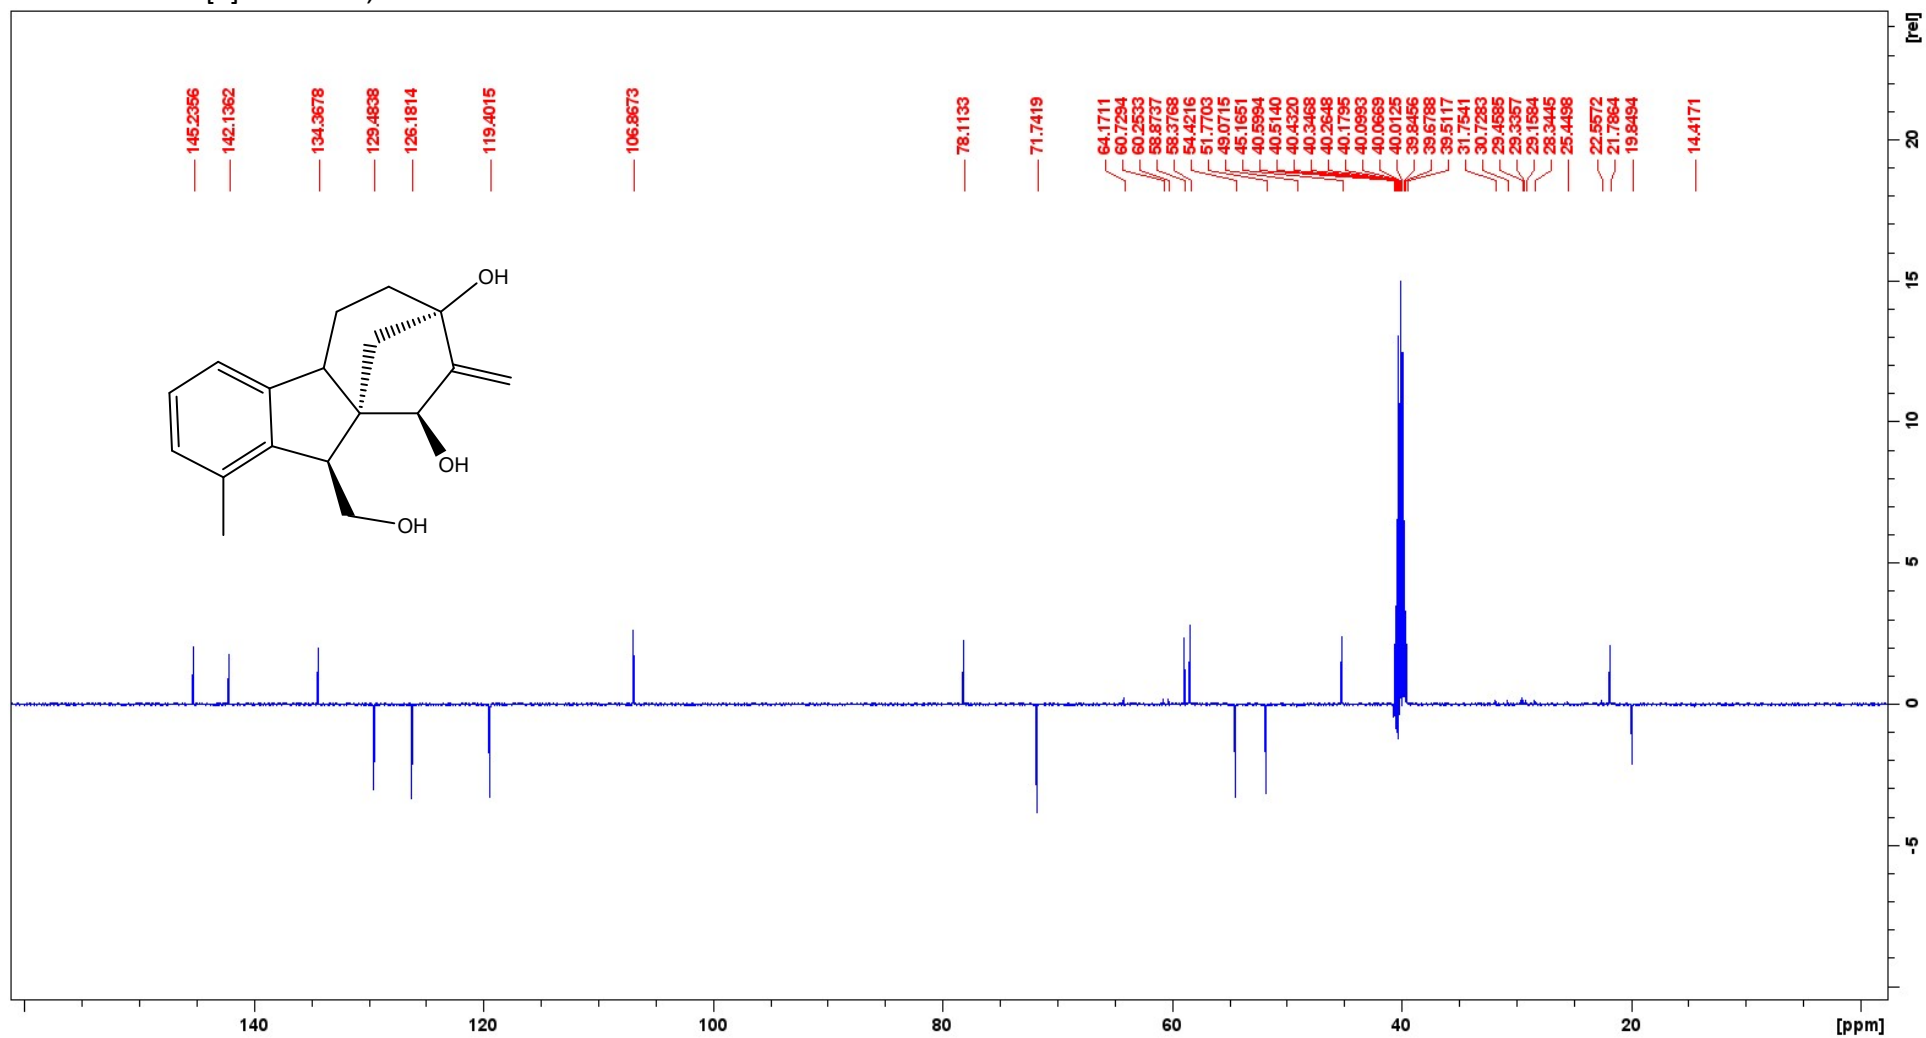



COSY of (4*b**R*,7*S*,9*S*,9*a**R*,10*S*)-10-(Hydroxymethyl)-1-methyl-8-methylene-4*b*,5,6,8,9,10-hexahydro-7*H*-7,9*a*-methanobenzo[*a*]azulene-7,9-diol **6**

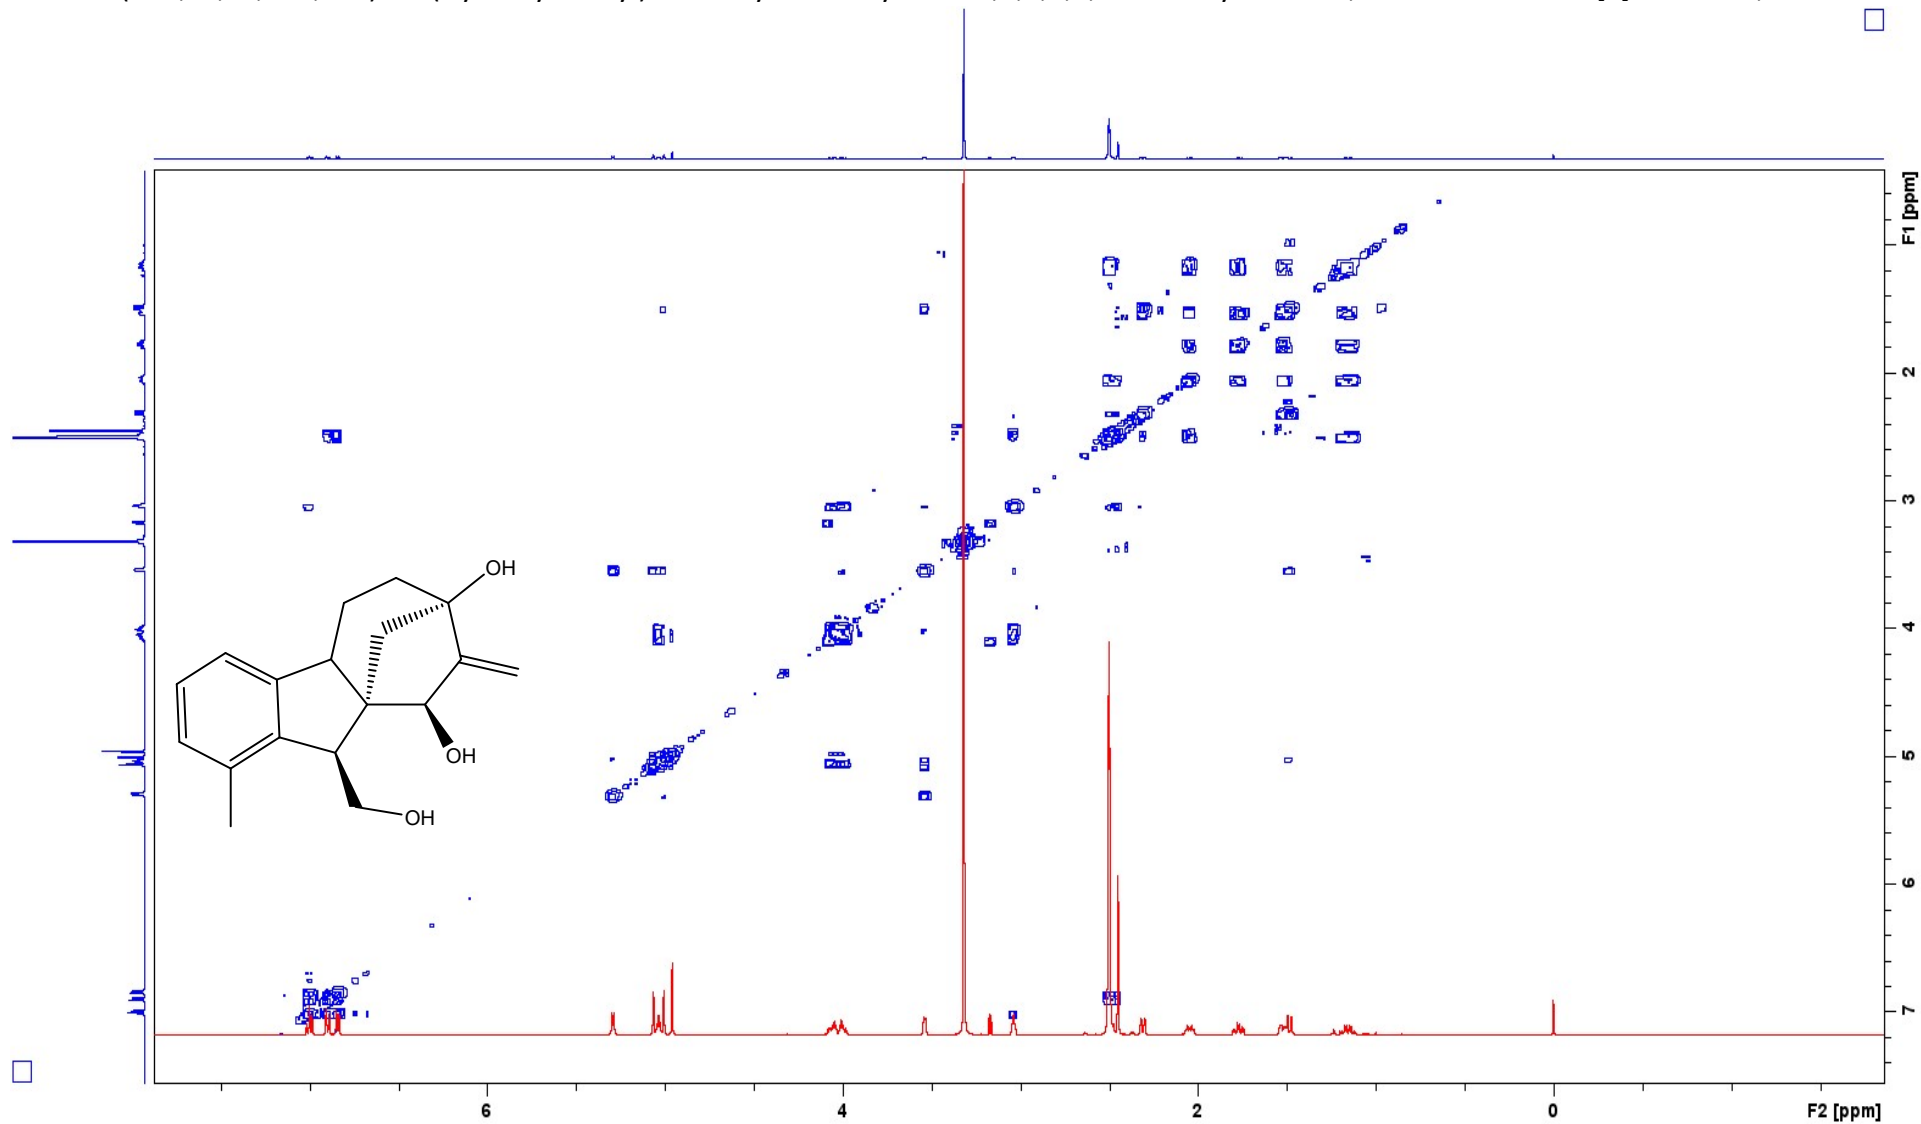

NOESY of (4*R*,7*S*,9*S*,9*aR*,10*S*)-10-(Hydroxymethyl)-1-methyl-8-methylene-4*b*,5,6,8,9,10-hexahydro-7*H*-7,9*a*-methanobenzo[*a*]azulene-7,9-diol  
6

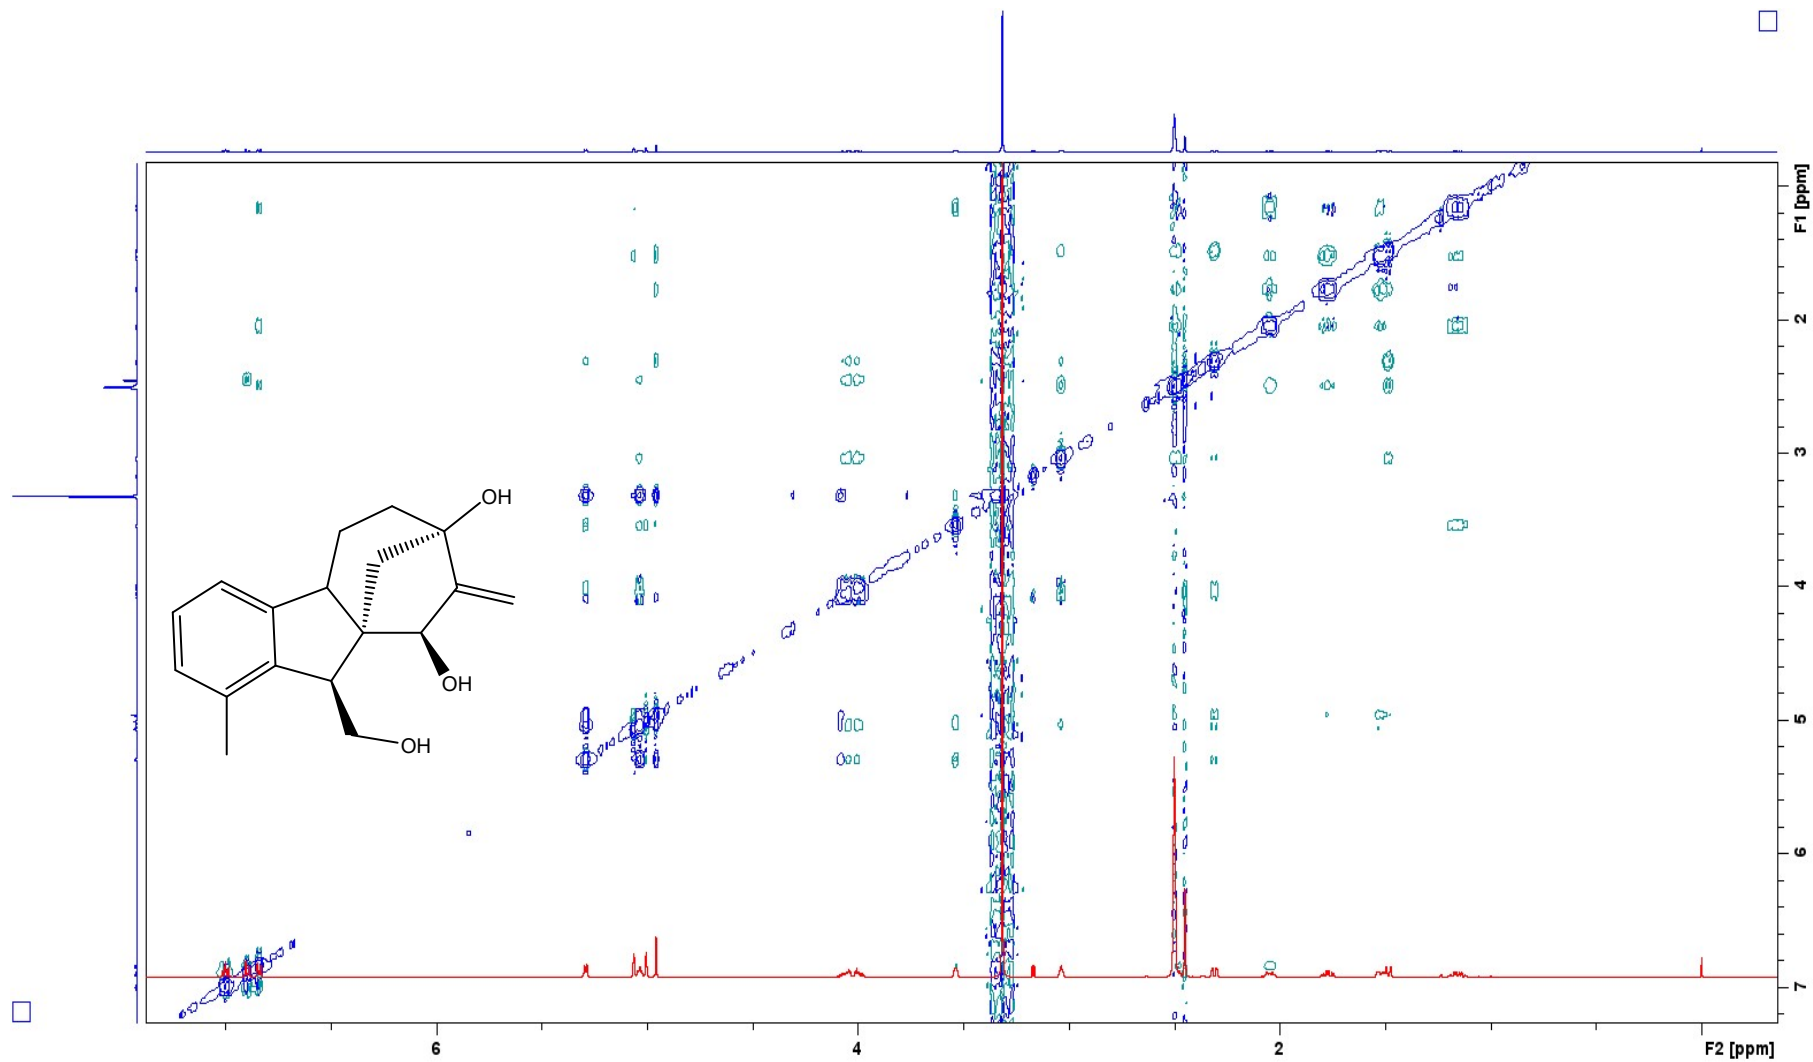

HSQC of (4*bR*,7*S*,9*S*,9*aR*,10*S*)-10-(Hydroxymethyl)-1-methyl-8-methylene-4*b*,5,6,8,9,10-hexahydro-7*H*-7,9*a*-methanobenzo[*a*]azulene-7,9-diol **6**

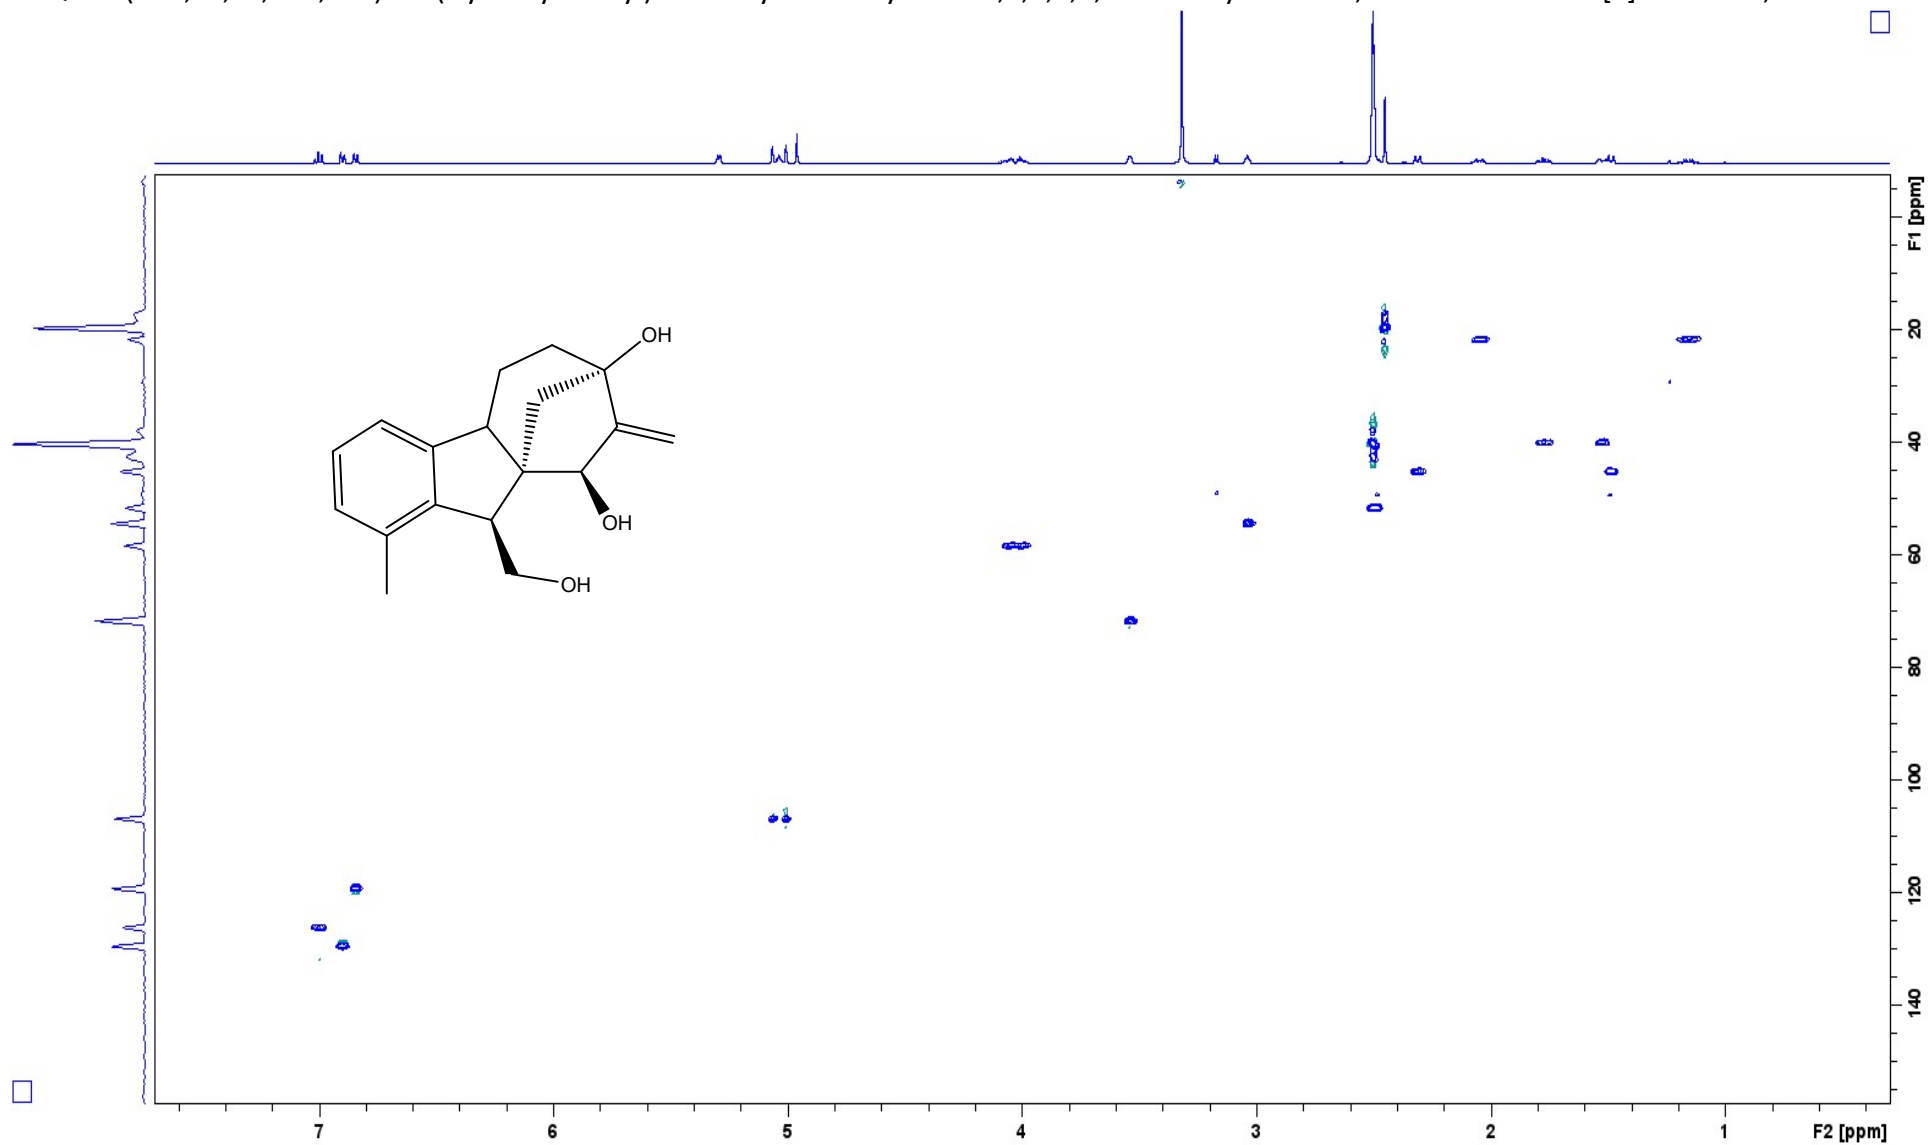

HMBC of (4*bR*,7*S*,9*S*,9*aR*,10*S*)-10-(Hydroxymethyl)-1-methyl-8-methylene-4*b*,5,6,8,9,10-hexahydro-7*H*-7,9*a*-methanobenzo[*a*]azulene-7,9-diol  
6

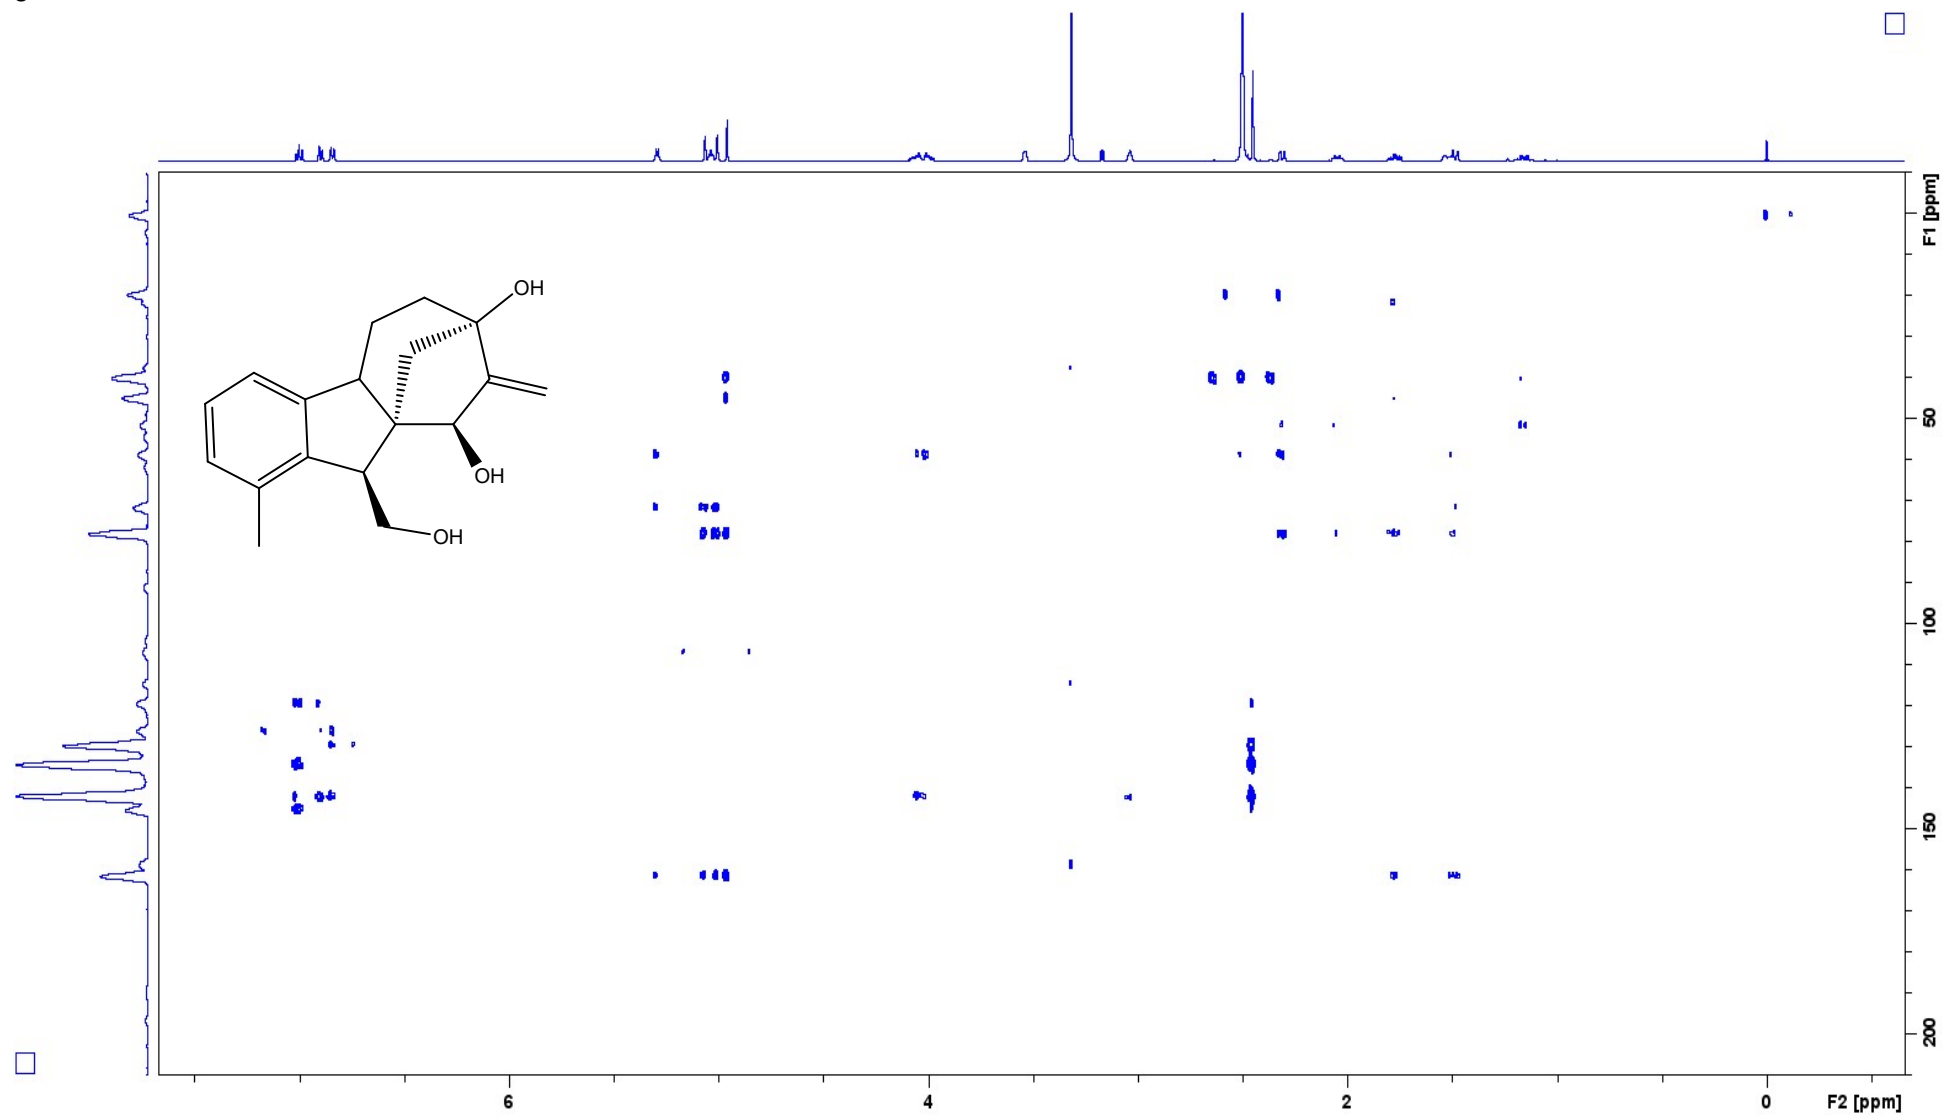

$^1\text{H-NMR}$  (500 MHz) of (4a*R*,4a1*R*,6*S*,12*bS*)-3,3,12-Trimethyl-5-methylene-4a,5,7,8,8a,12*b*-hexahydro-4a1,6-methanobenzo[2,3]azuleno[8,1-de][1,3]dioxepin-6(1*H*)-ol **7**

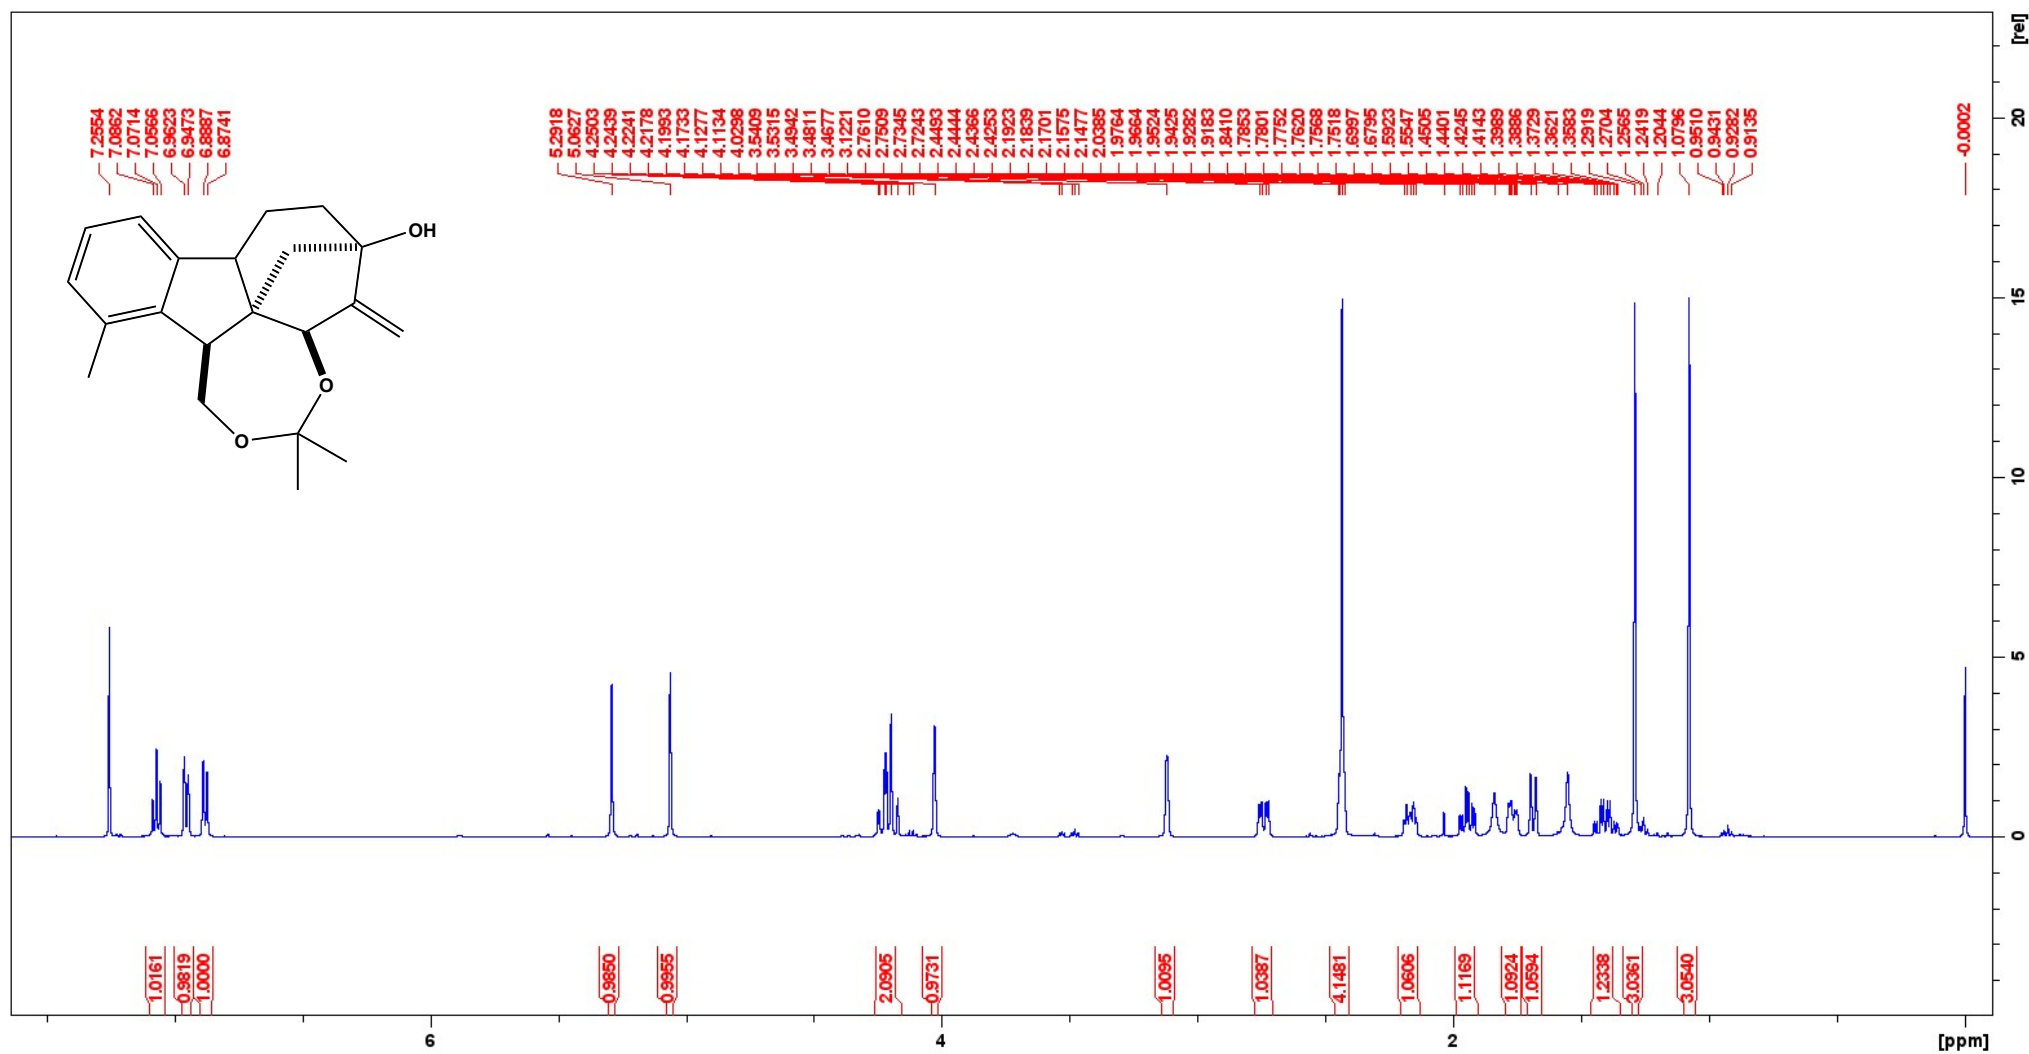

$^{13}\text{C}\{^1\text{H}\}$  J-MOD NMR (125 MHz) of (4aR,4a1R,6S,12bS)-3,3,12-Trimethyl-5-methylene-4a,5,7,8,8a,12b-hexahydro-4a1,6-methanobenzo[2,3]azuleno[8,1-de][1,3]dioxepin-6(1H)-ol **7**

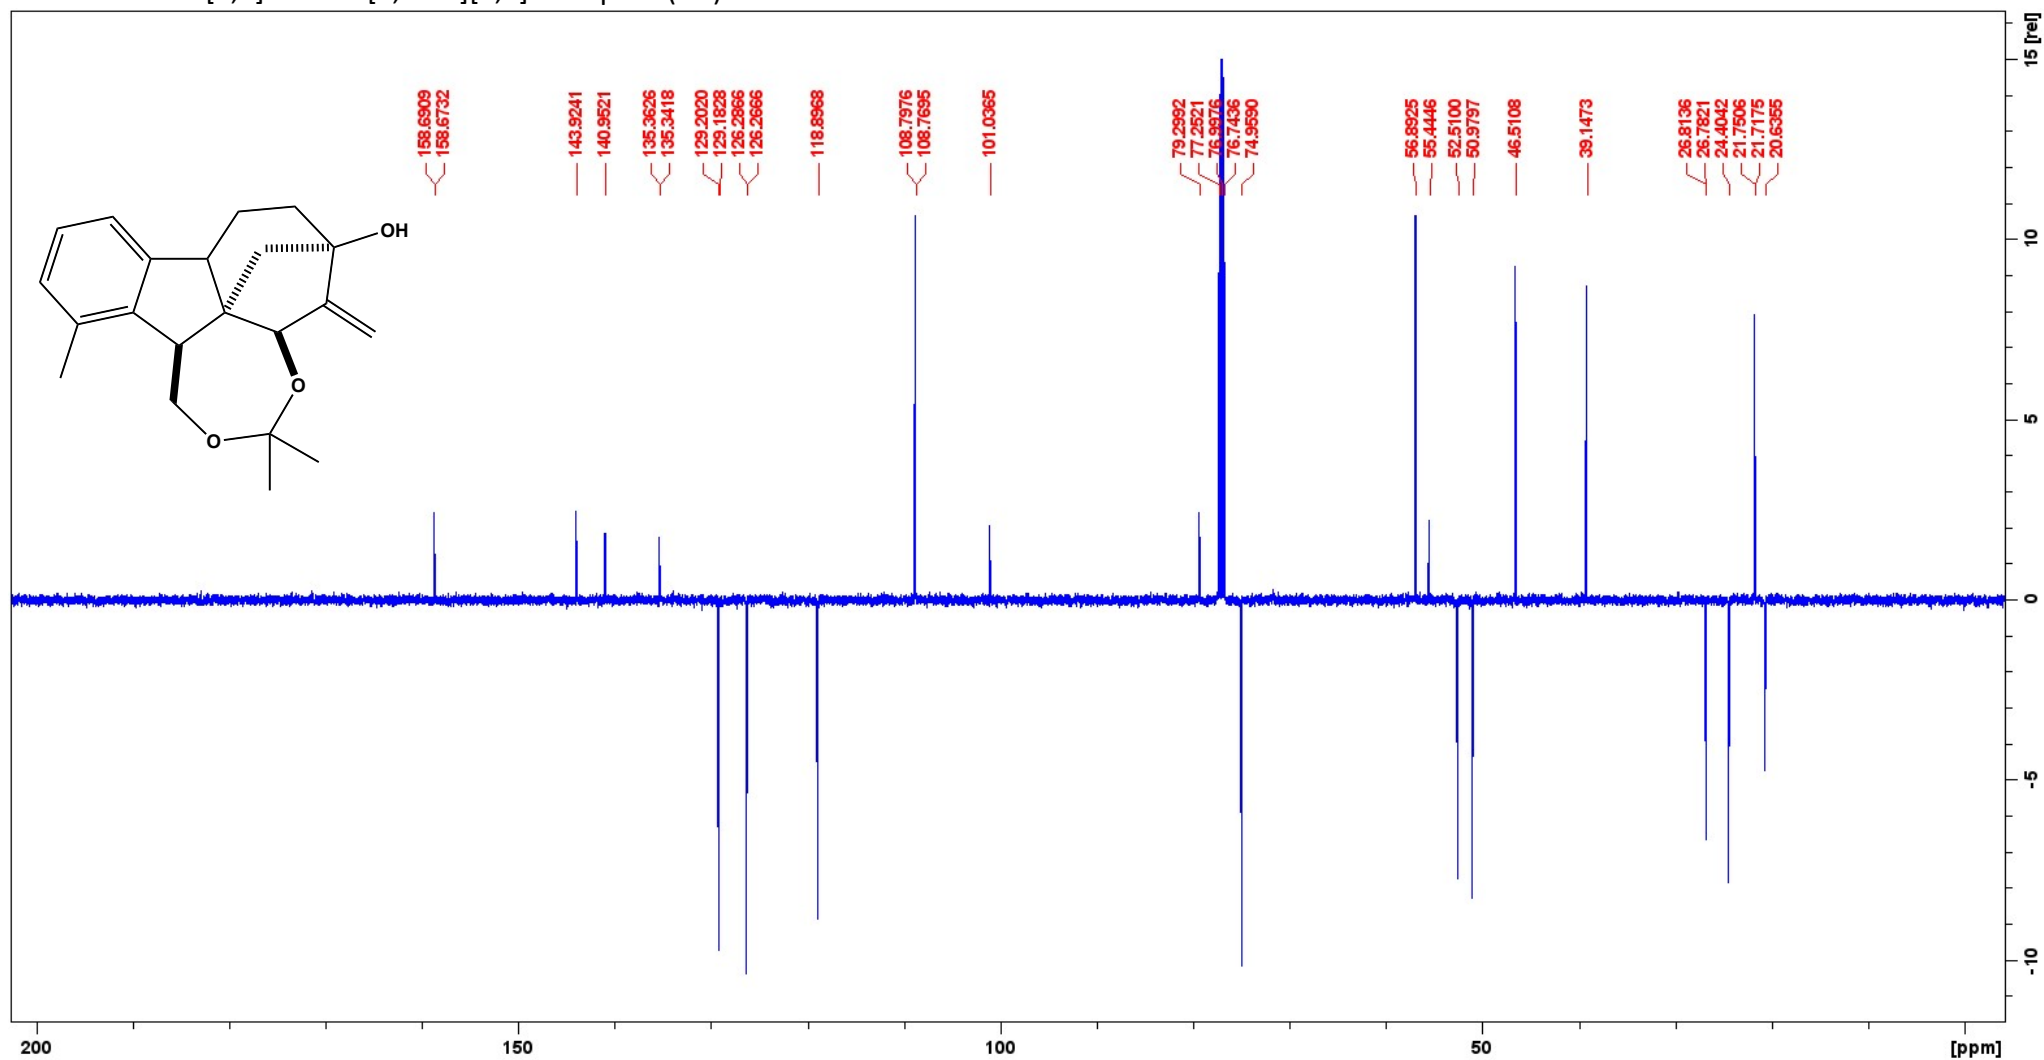

COSY of (4aR,4a1R,6S,12bS)-3,3,12-Trimethyl-5-methylene-4a,5,7,8,8a,12b-hexahydro-4a1,6-methanobenzo[2,3]azuleno[8,1-de][1,3]dioxepin-6(1H)-ol **7**

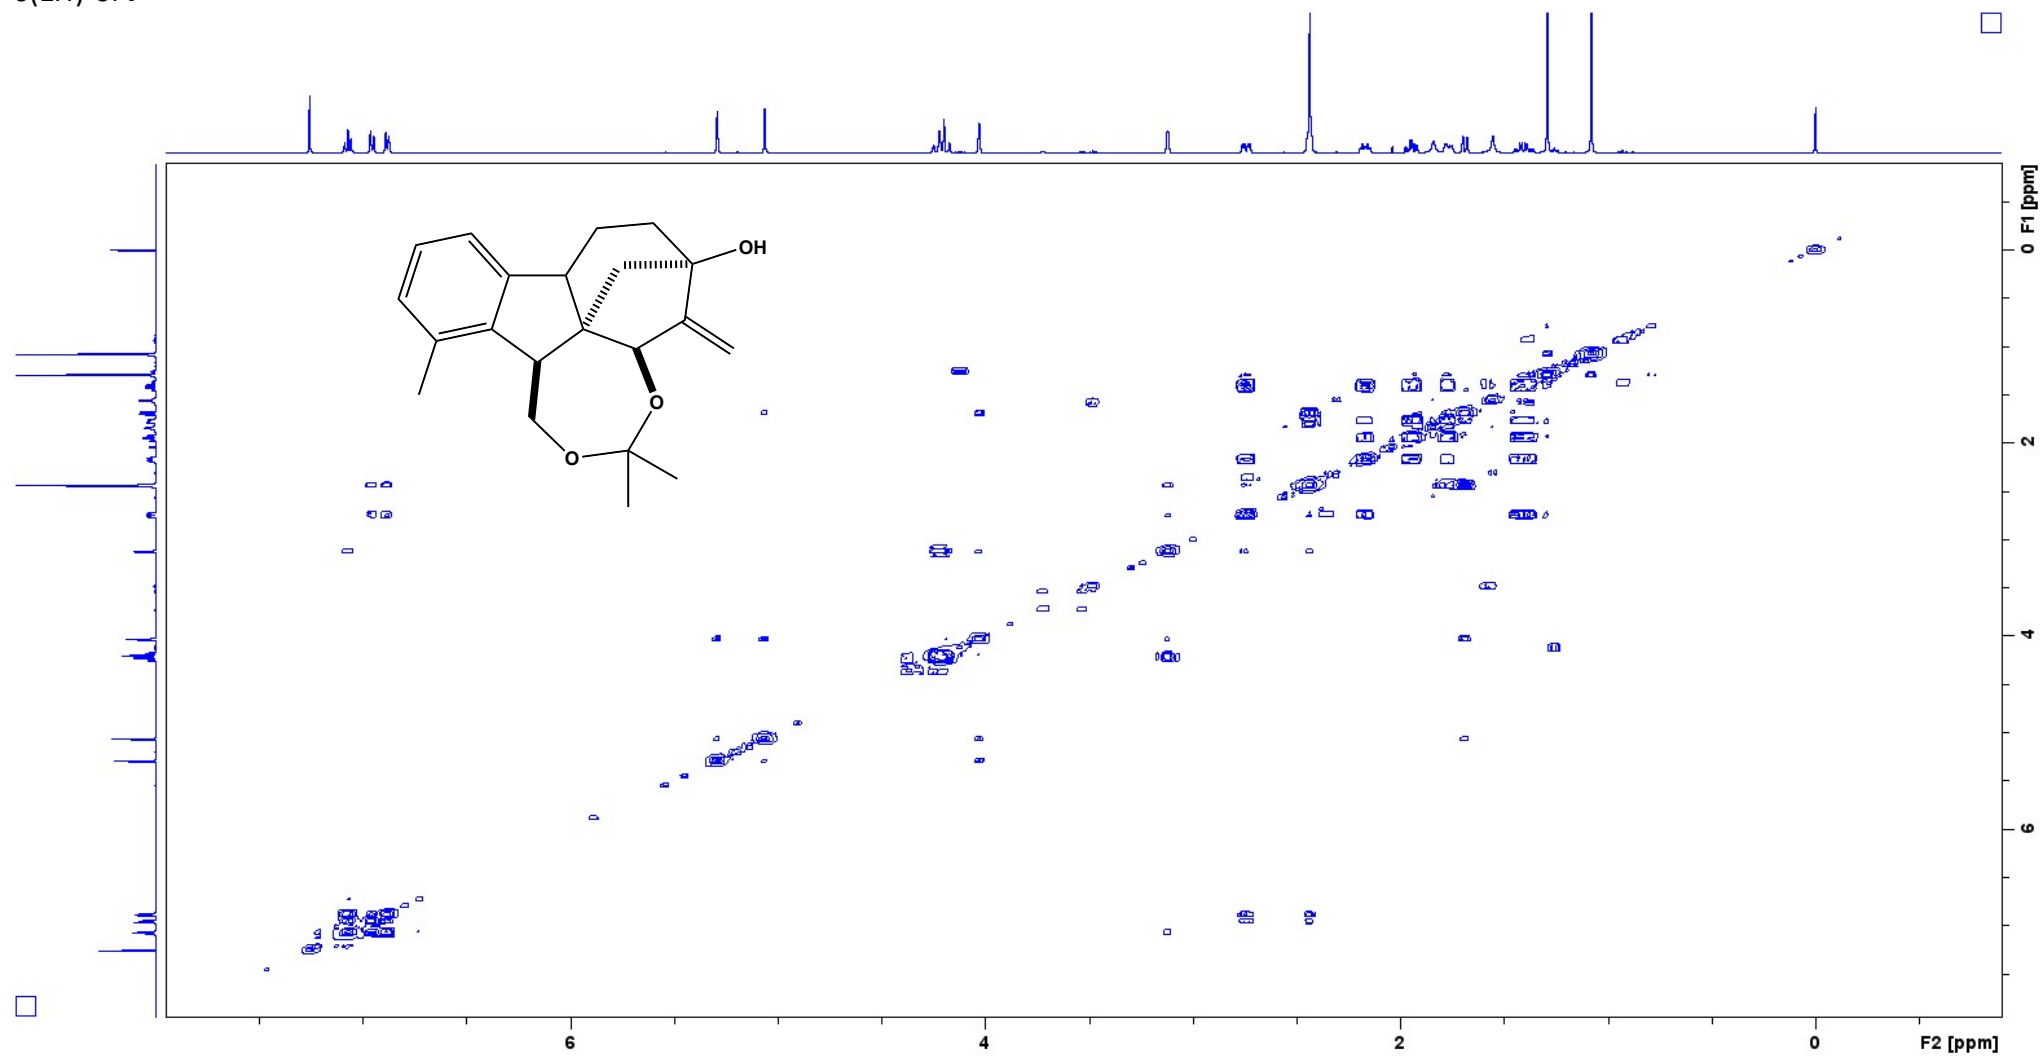

NOESY of (4aR,4a1R,6S,12bS)-3,3,12-Trimethyl-5-methylene-4a,5,7,8,8a,12b-hexahydro-4a1,6-methanobenzo[2,3]azuleno[8,1-de][1,3]dioxepin-6(1H)-ol **7**

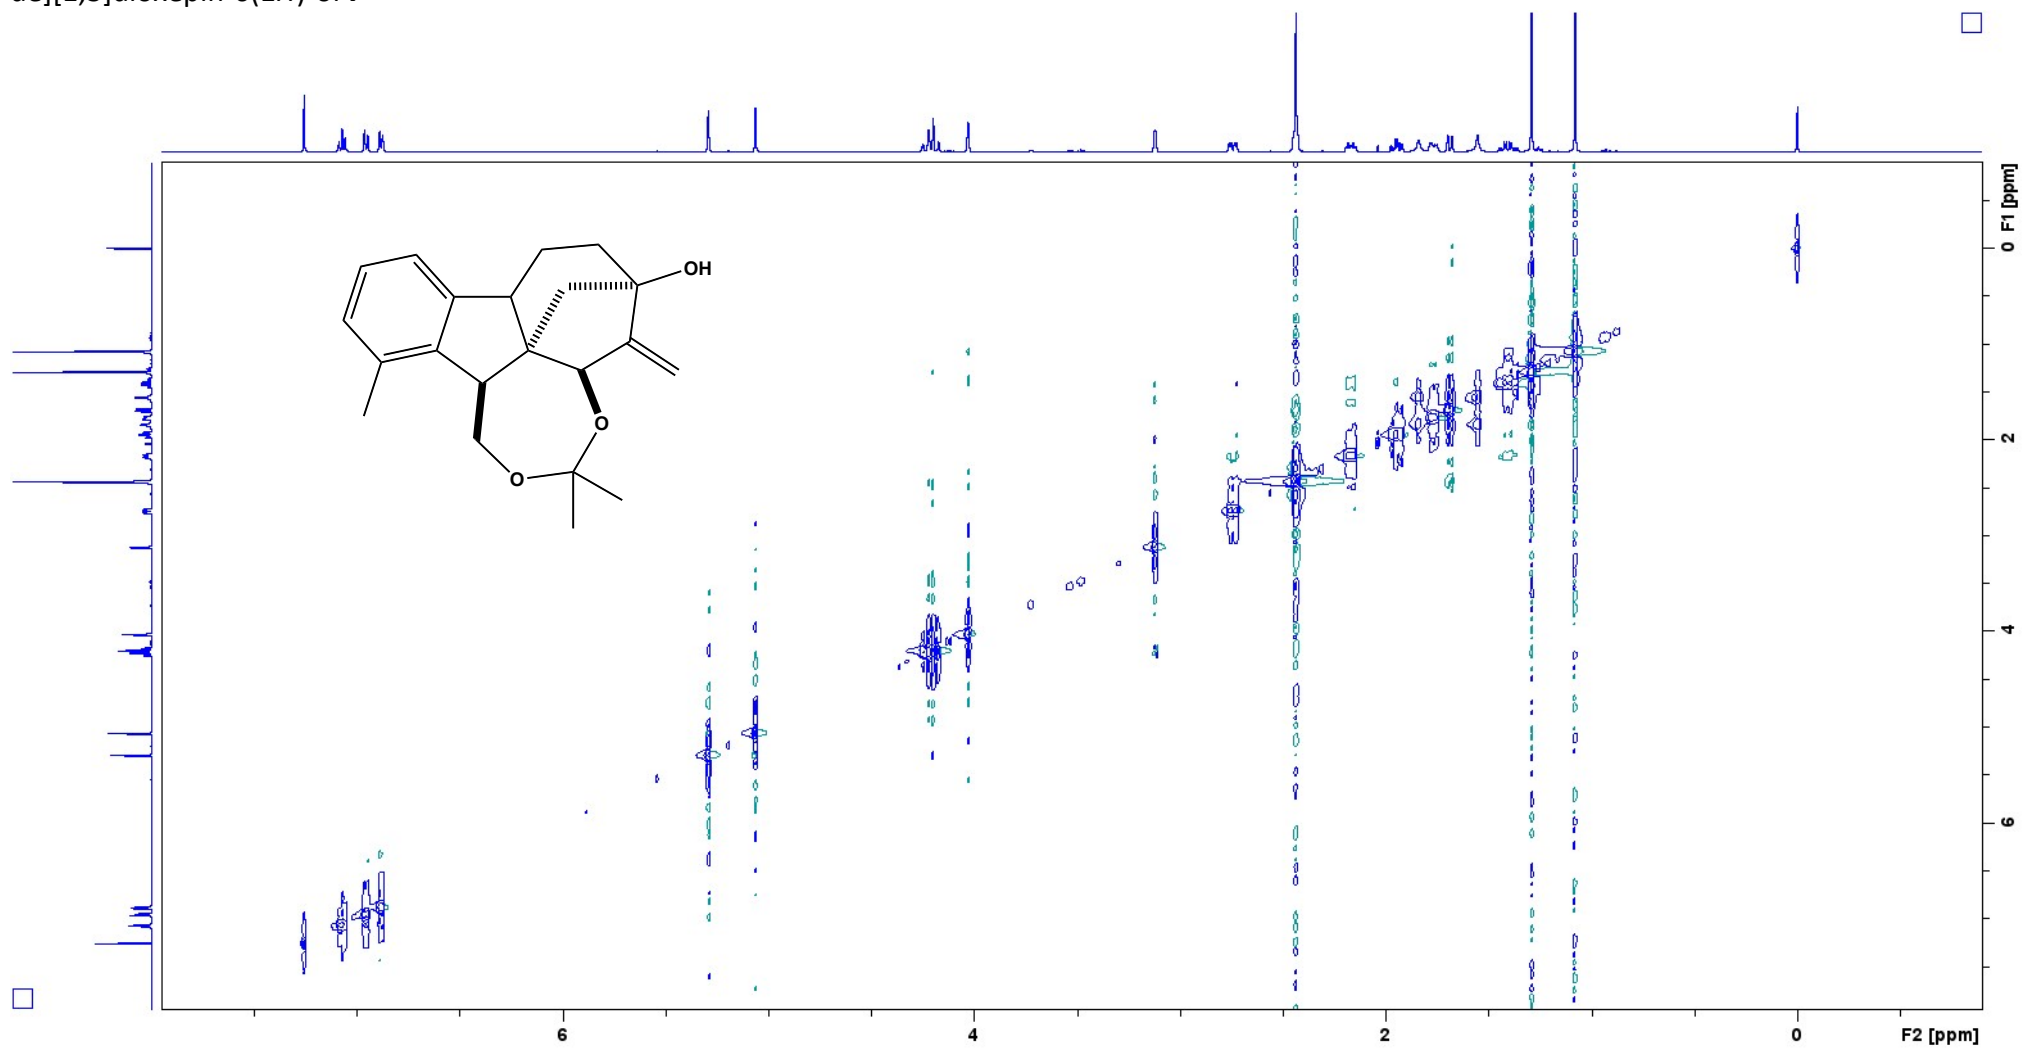



HSQC of (4a*R*,4a1*R*,6*S*,12*bS*)-3,3,12-Trimethyl-5-methylene-4a,5,7,8,8a,12b-hexahydro-4a1,6-methanobenzo[2,3]azuleno[8,1-de][1,3]dioxepin-6(1*H*)-ol **7**

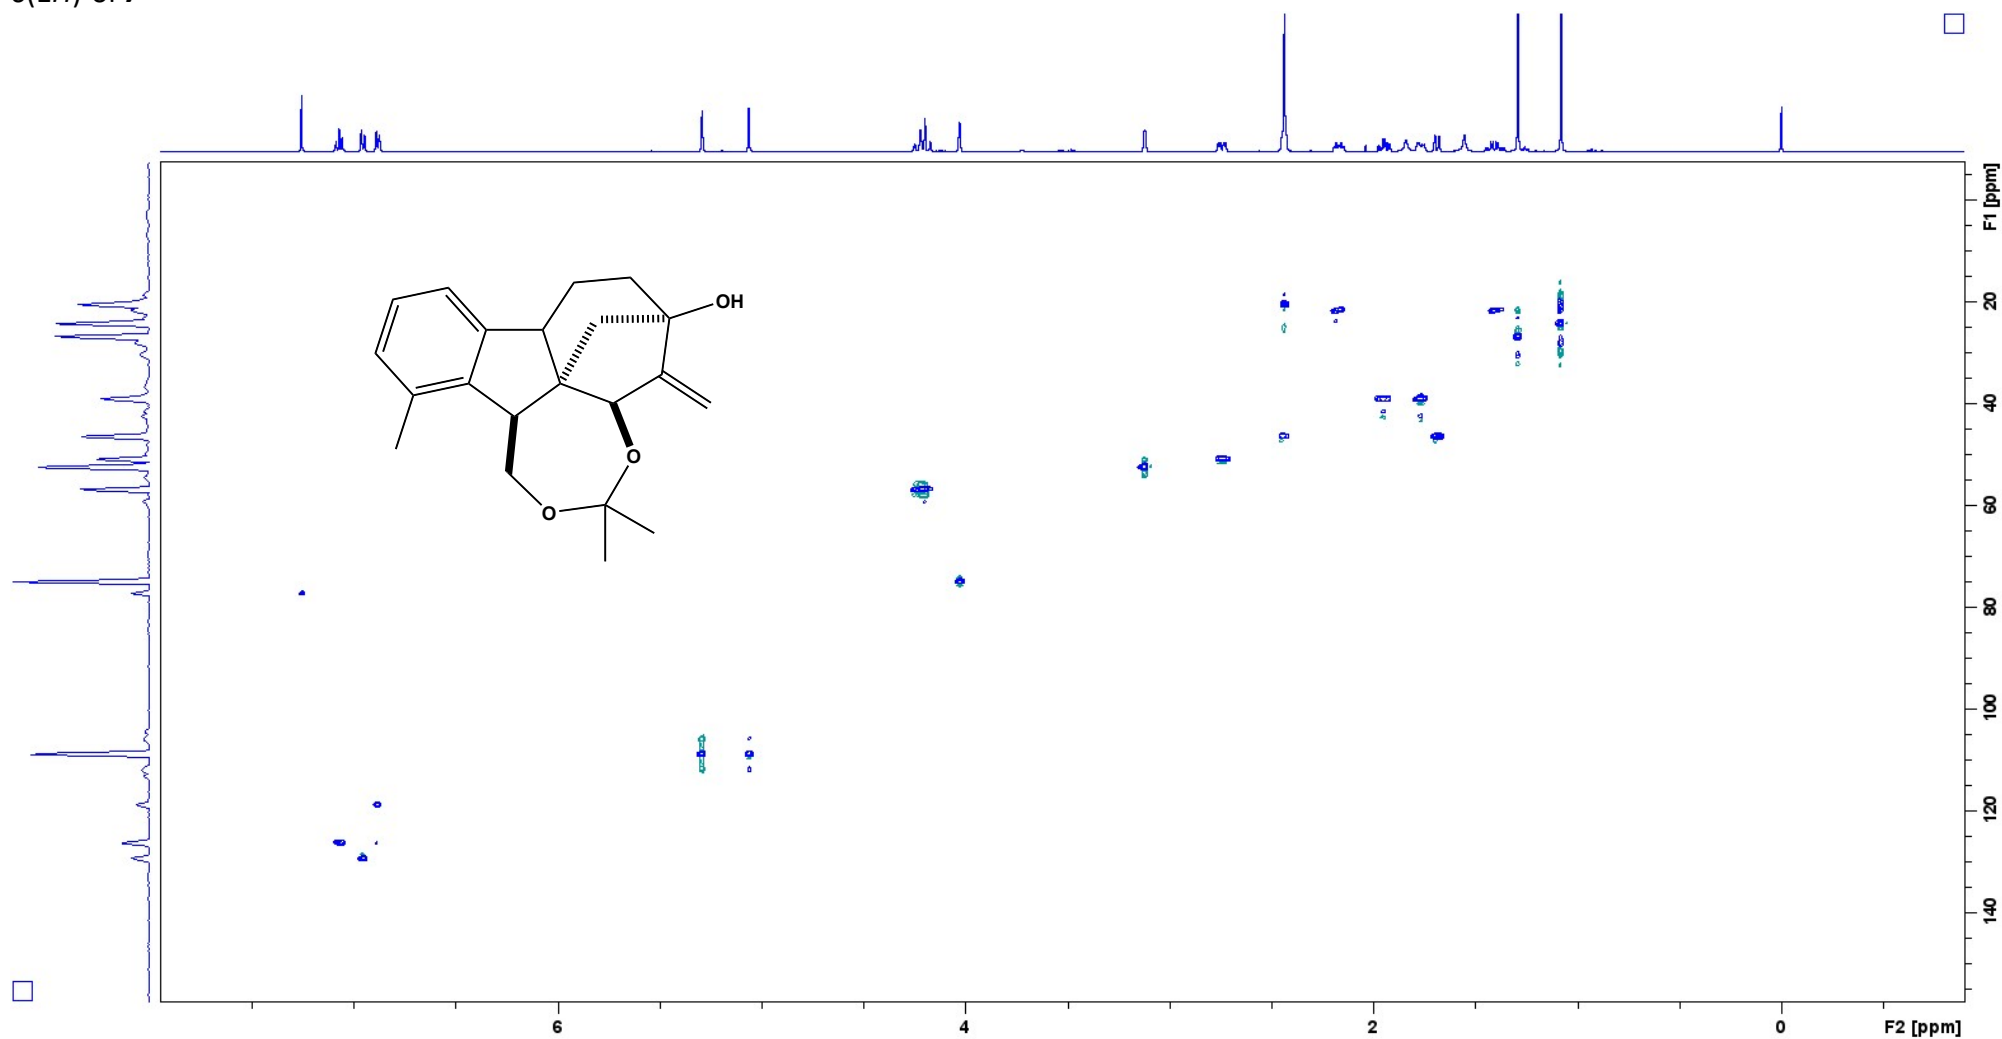

HMBC of (4*a**R*,4*a**1R*,6*S*,12*bS*)-3,3,12-Trimethyl-5-methylene-4*a*,5,7,8,8*a*,12*b*-hexahydro-4*a*1,6-methanobenzo[2,3]azuleno[8,1-de][1,3]dioxepin-6(1*H*)-ol **7**

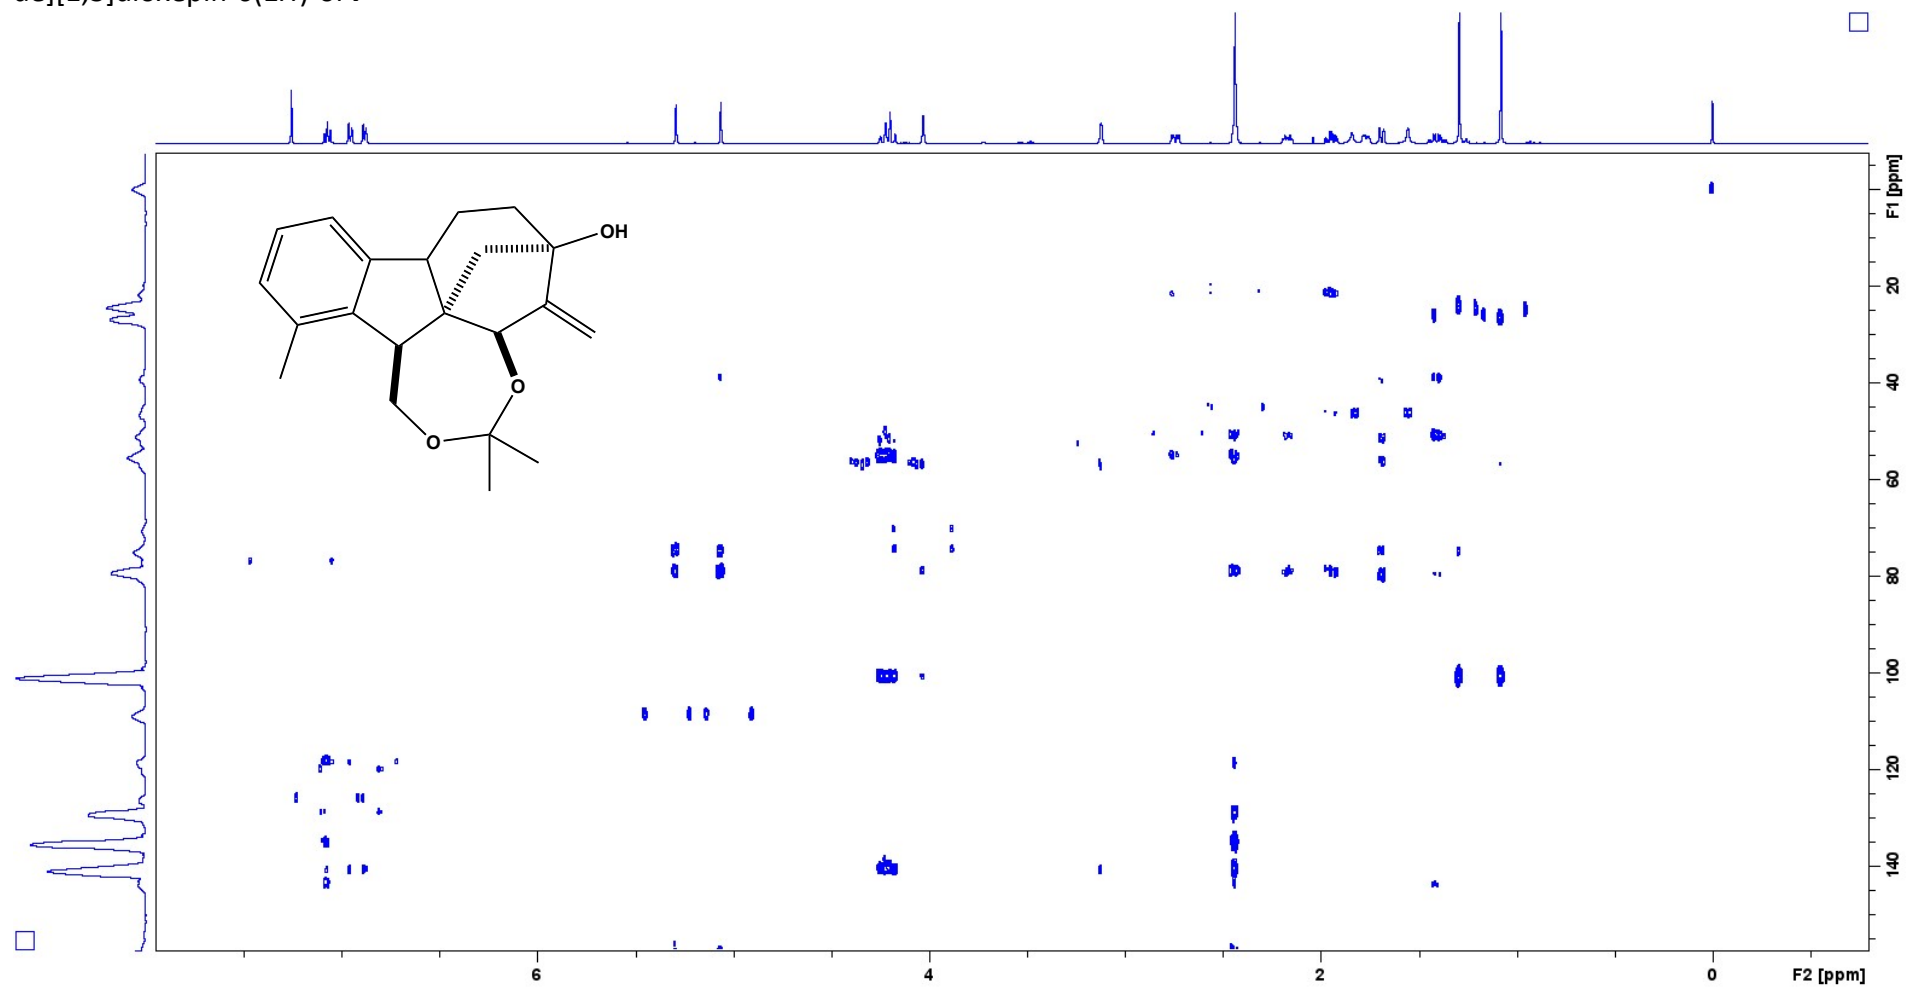

$^1\text{H-NMR}$  (500 MHz) of (2*R*,4*a*'*S*,4*a*<sup>1</sup>*R*,6'*S*,12*b*'*S*)-3',3',12'-Trimethyl-7',8',8*a*',12*b*'-tetrahydro-4*a*'*H*-spiro[oxirane-2,5'-[4*a*<sup>1</sup>,6]methanobenzo[2,3]azuleno[8,1-de][1,3]dioxepin]-6'(1'*H*)-ol **8**

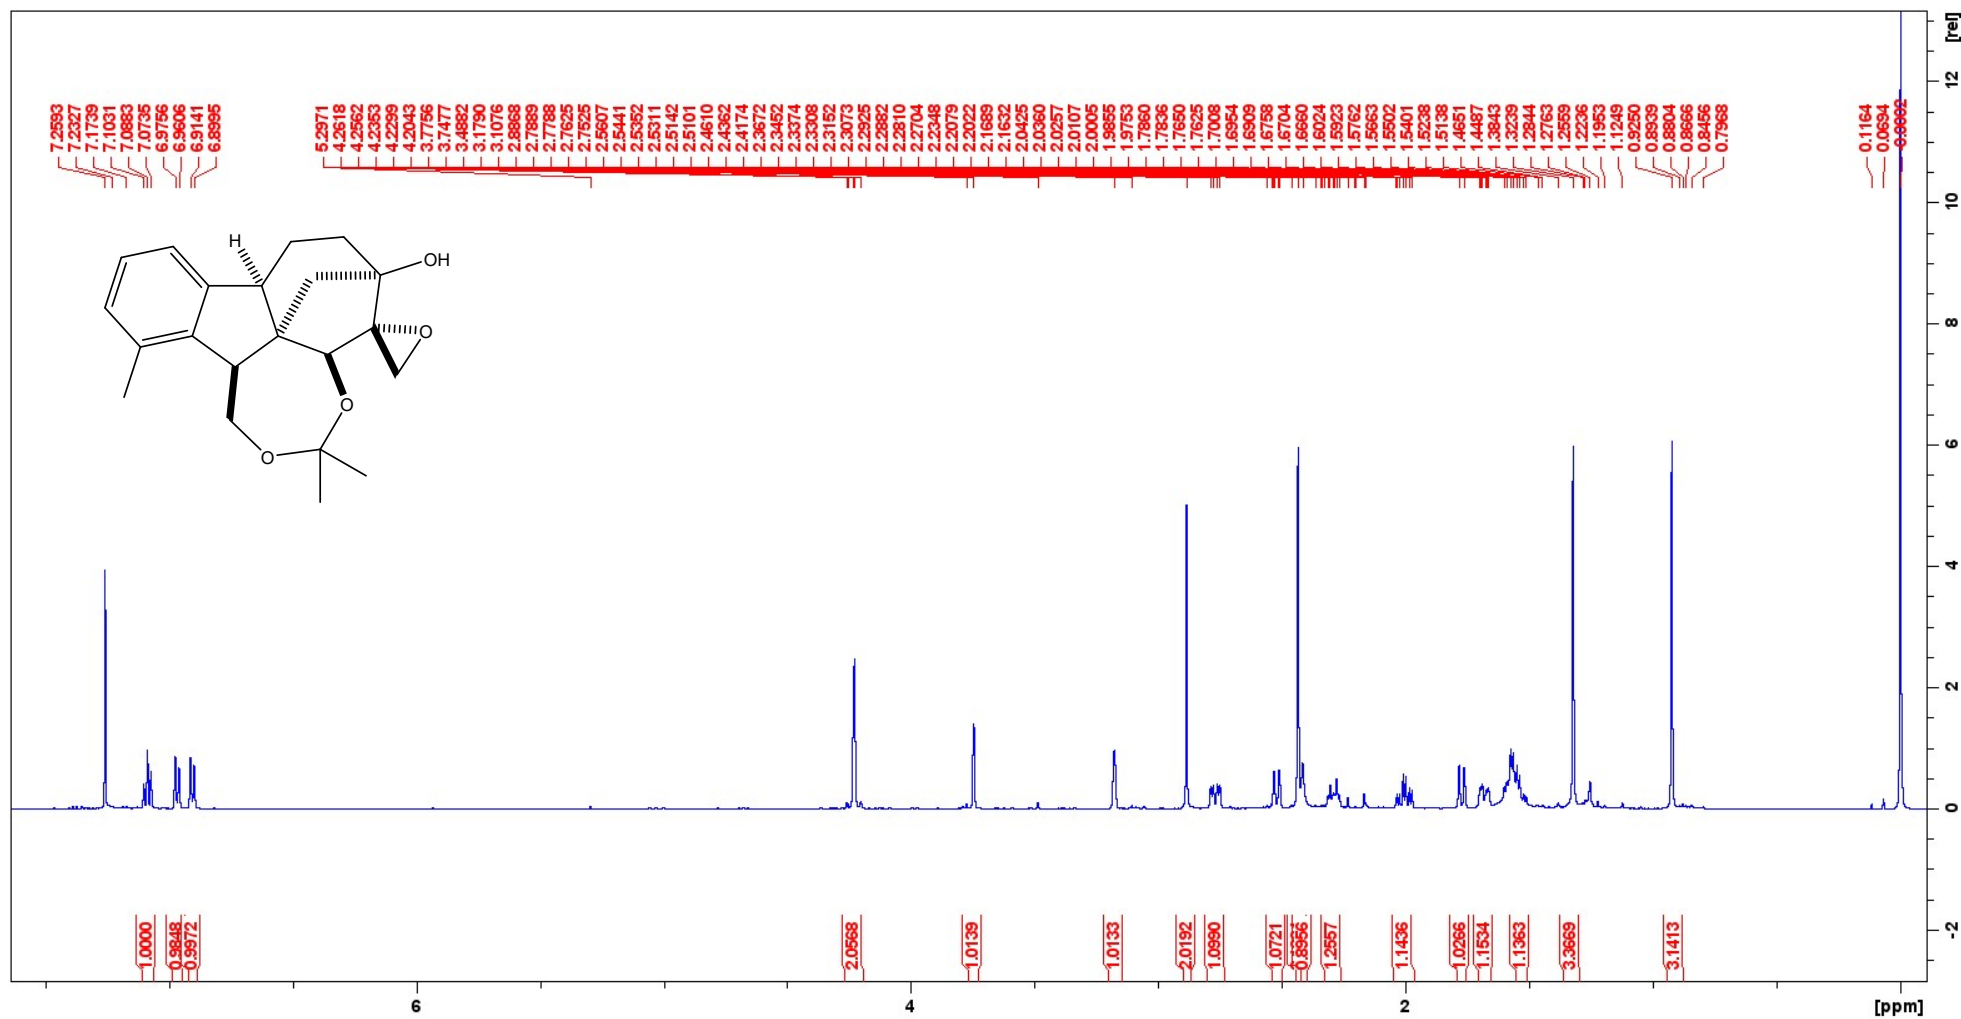

$^{13}\text{C}\{^1\text{H}\}$  J-MOD NMR (125 MHz) of (2*R*,4*a*'*S*,4*a*<sup>1</sup>*R*,6'*S*,12*b*'*S*)-3',3',12'-Trimethyl-7',8',8*a*',12*b*'-tetrahydro-4*a*'*H*-spiro[oxirane-2,5'-[4*a*<sup>1</sup>,6]methanobenzo[2,3]azuleno[8,1-de][1,3]dioxepin]-6'(1'*H*)-ol **8**

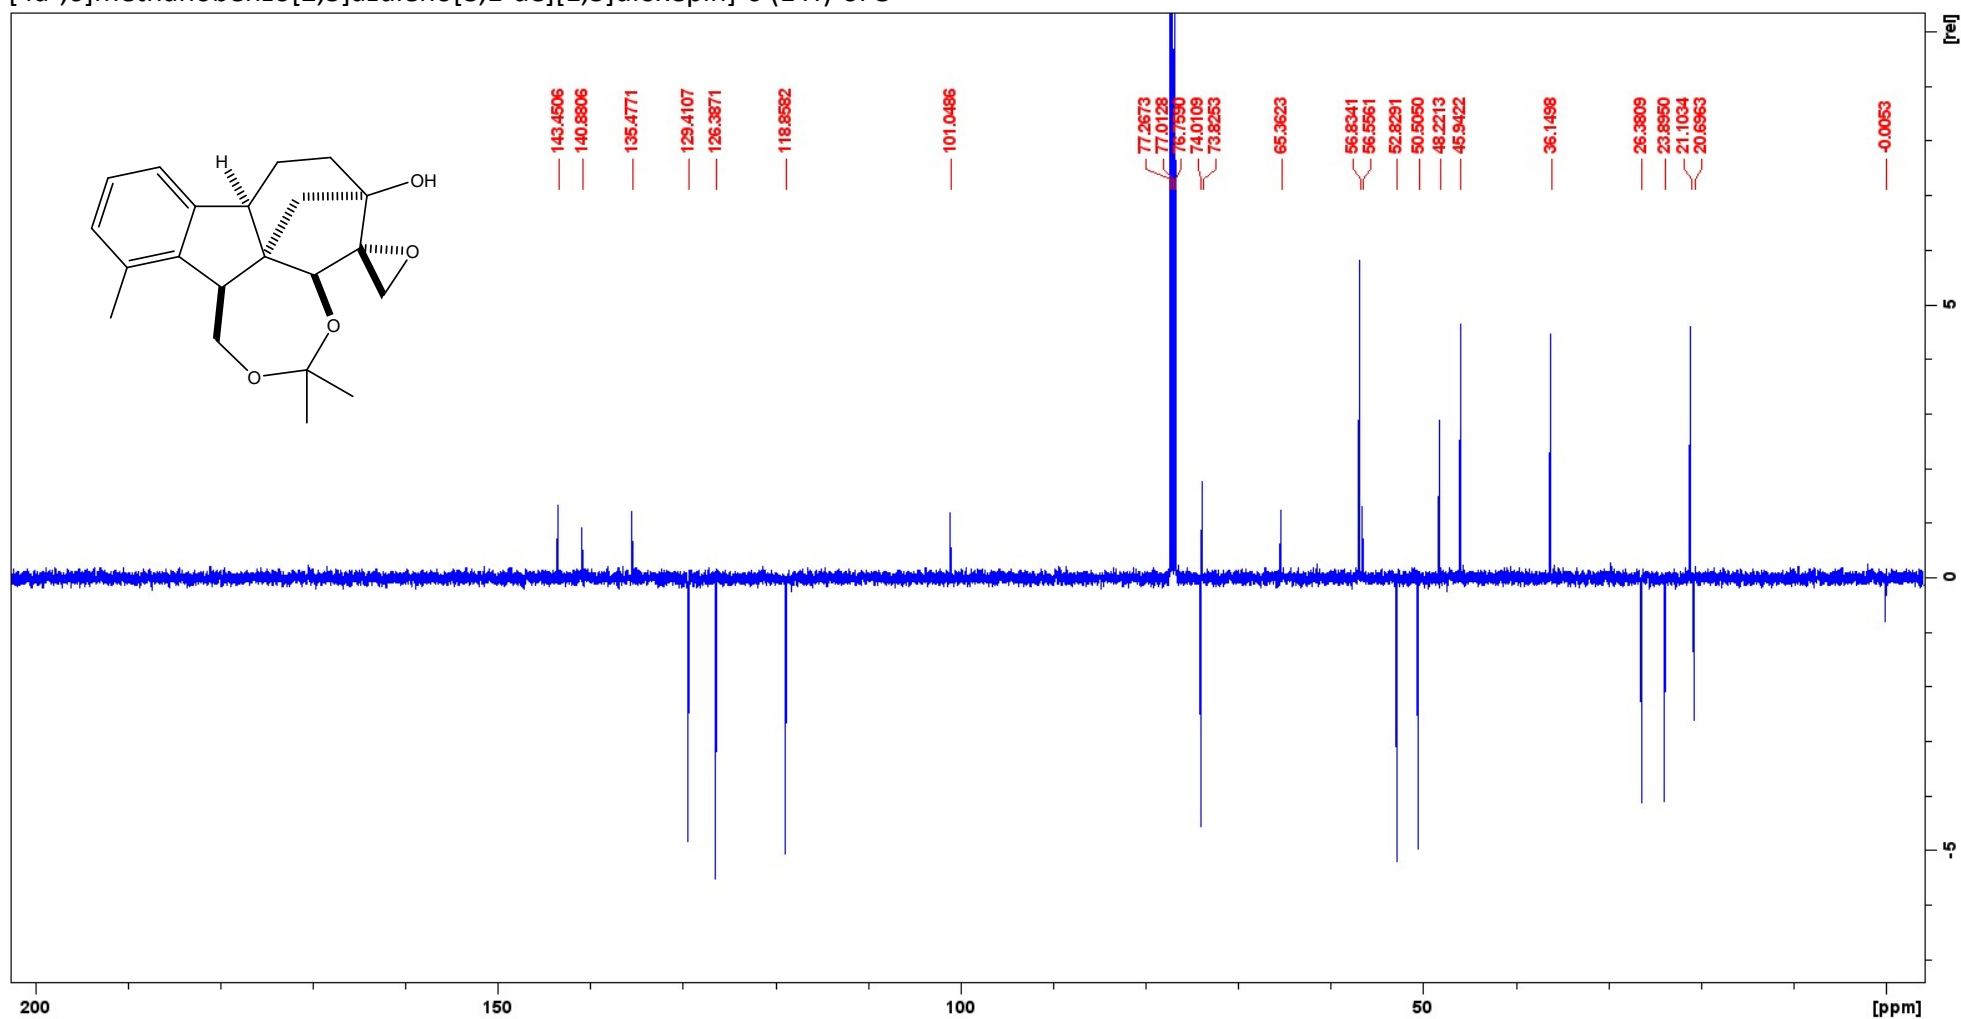

COSY of (2*R*,4*a*'*S*,4*a*<sup>1</sup>*R*,6'*S*,12*b*'*S*)-3',3',12'-Trimethyl-7',8',8*a*',12*b*'-tetrahydro-4*a*'H-spiro[oxirane-2,5'-[4*a*<sup>1</sup>,6]methanobenzo[2,3]azuleno[8,1-de][1,3]dioxepin]-6'(1*H*)-ol **8**

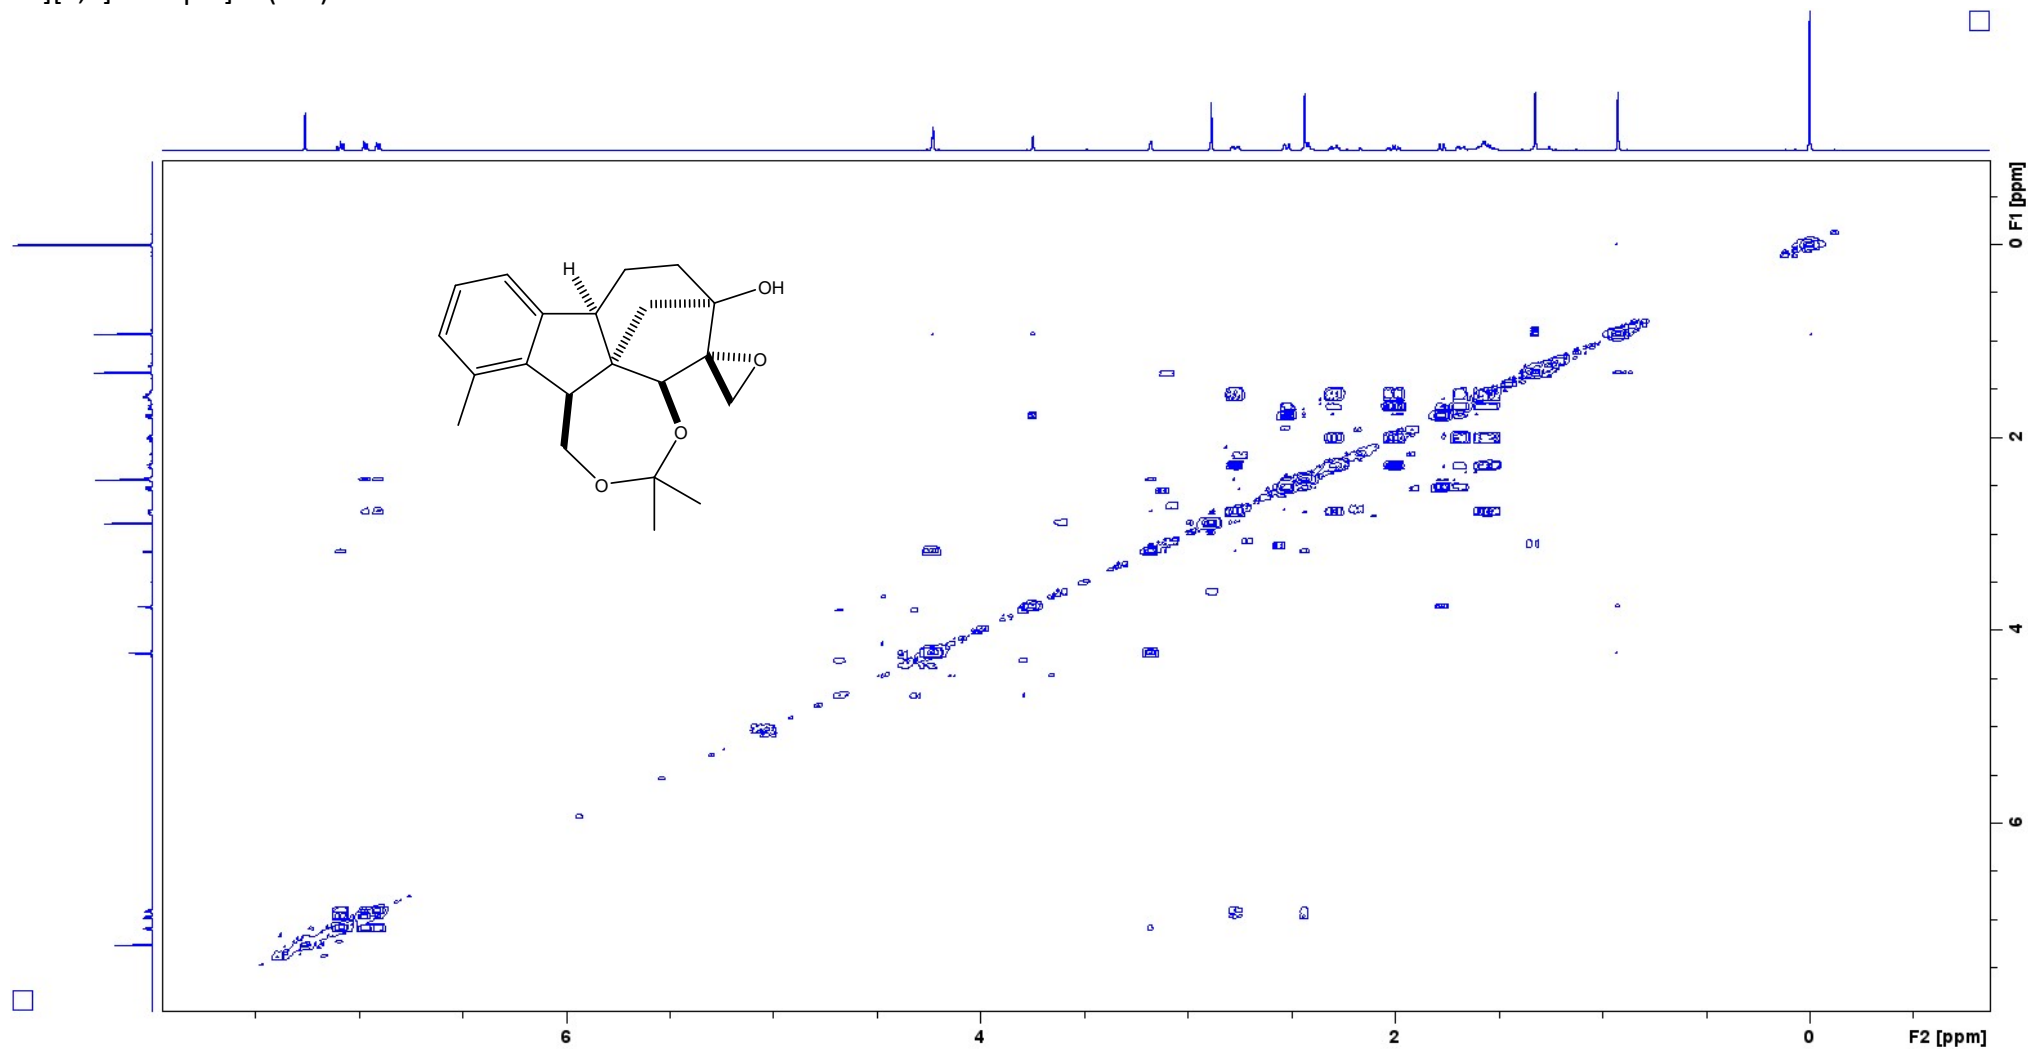

NOESY of (2*R*,4*a*'*S*,4*a*<sup>1</sup>*R*,6'*S*,12*b*'*S*)-3',3',12'-Trimethyl-7',8',8*a*',12*b*'-tetrahydro-4*a*'H-spiro[oxirane-2,5'-[4*a*<sup>1</sup>,6]methanobenzo[2,3]azuleno[8,1-de][1,3]dioxepin]-6'(1*H*)-ol **8**

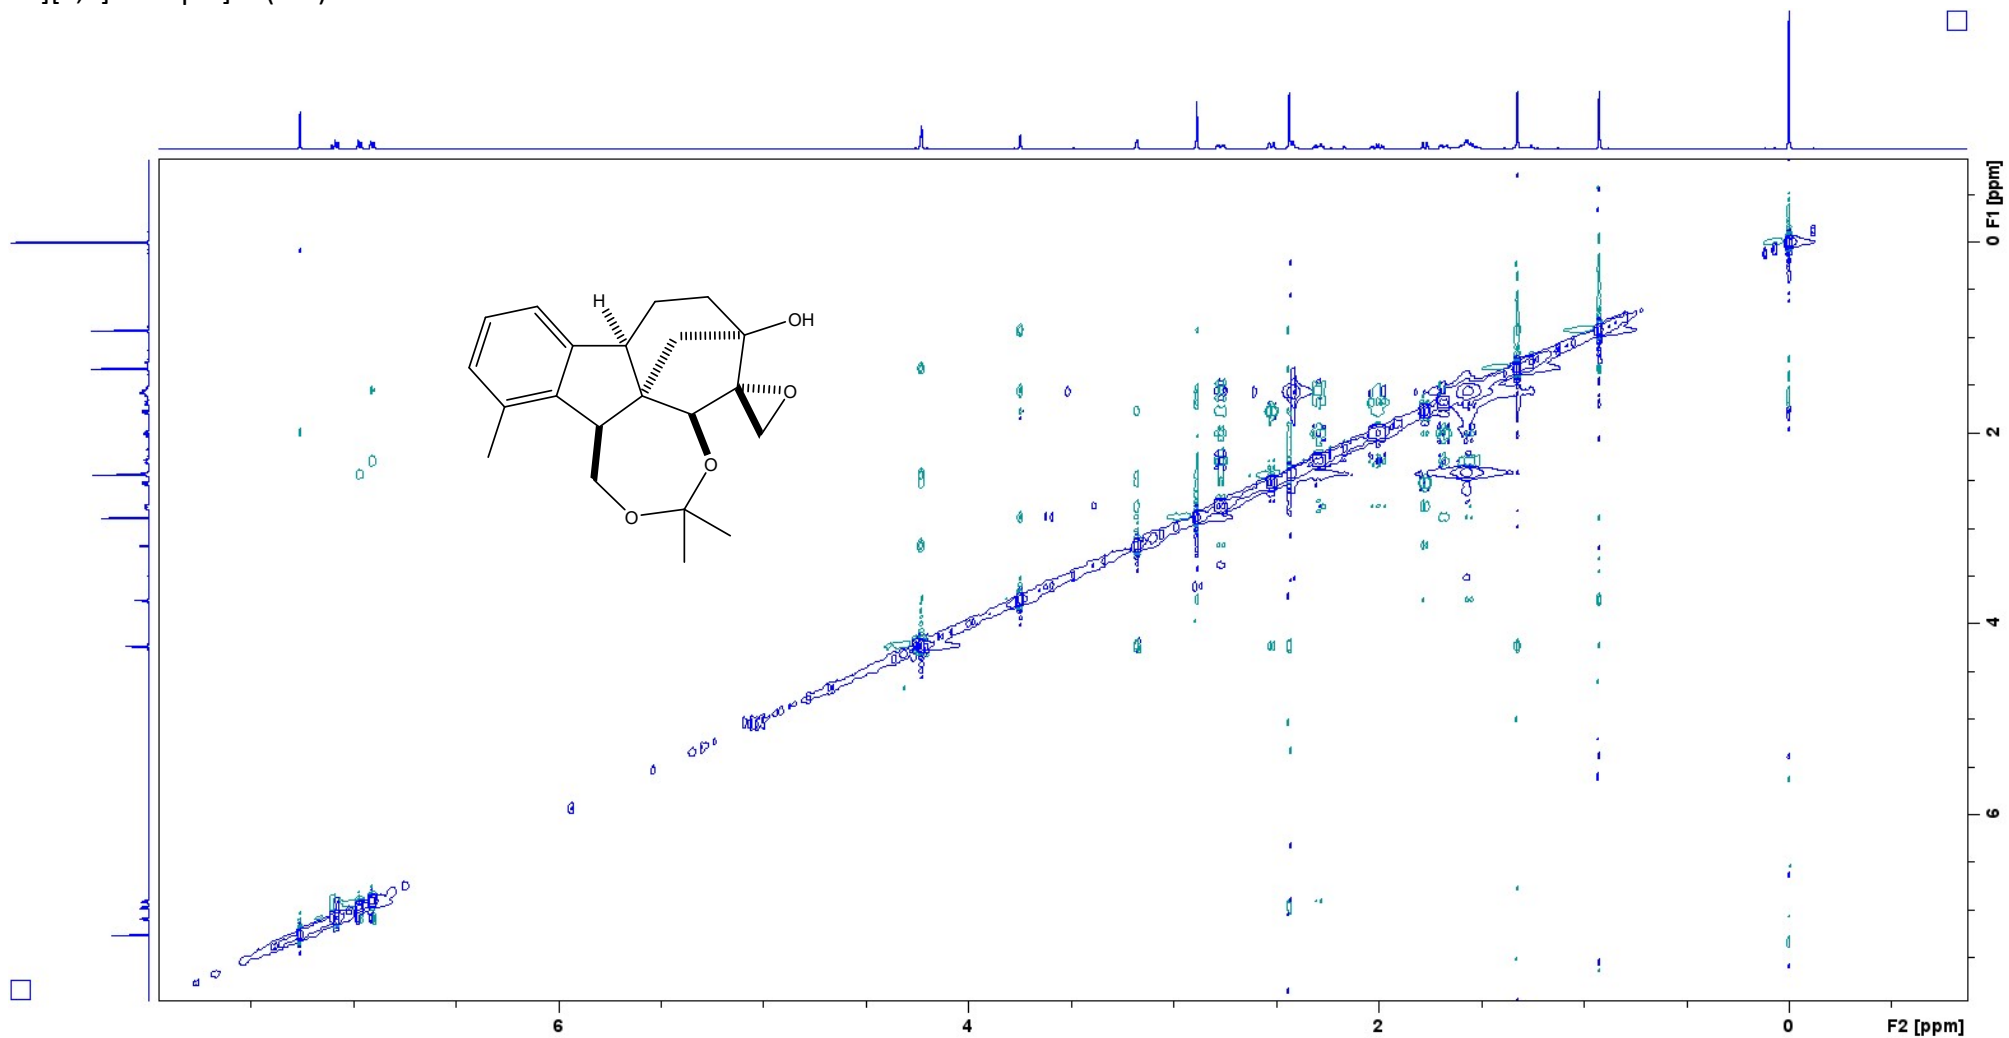

HSQC of (2*R*,4*a*'*S*,4*a*<sup>1</sup>*R*,6'*S*,12*b*'*S*)-3',3',12'-Trimethyl-7',8',8*a*',12*b*'-tetrahydro-4*a*'H-spiro[oxirane-2,5'-[4*a*<sup>1</sup>,6]methanobenzo[2,3]azuleno[8,1-de][1,3]dioxepin]-6'(1*H*)-ol **8**

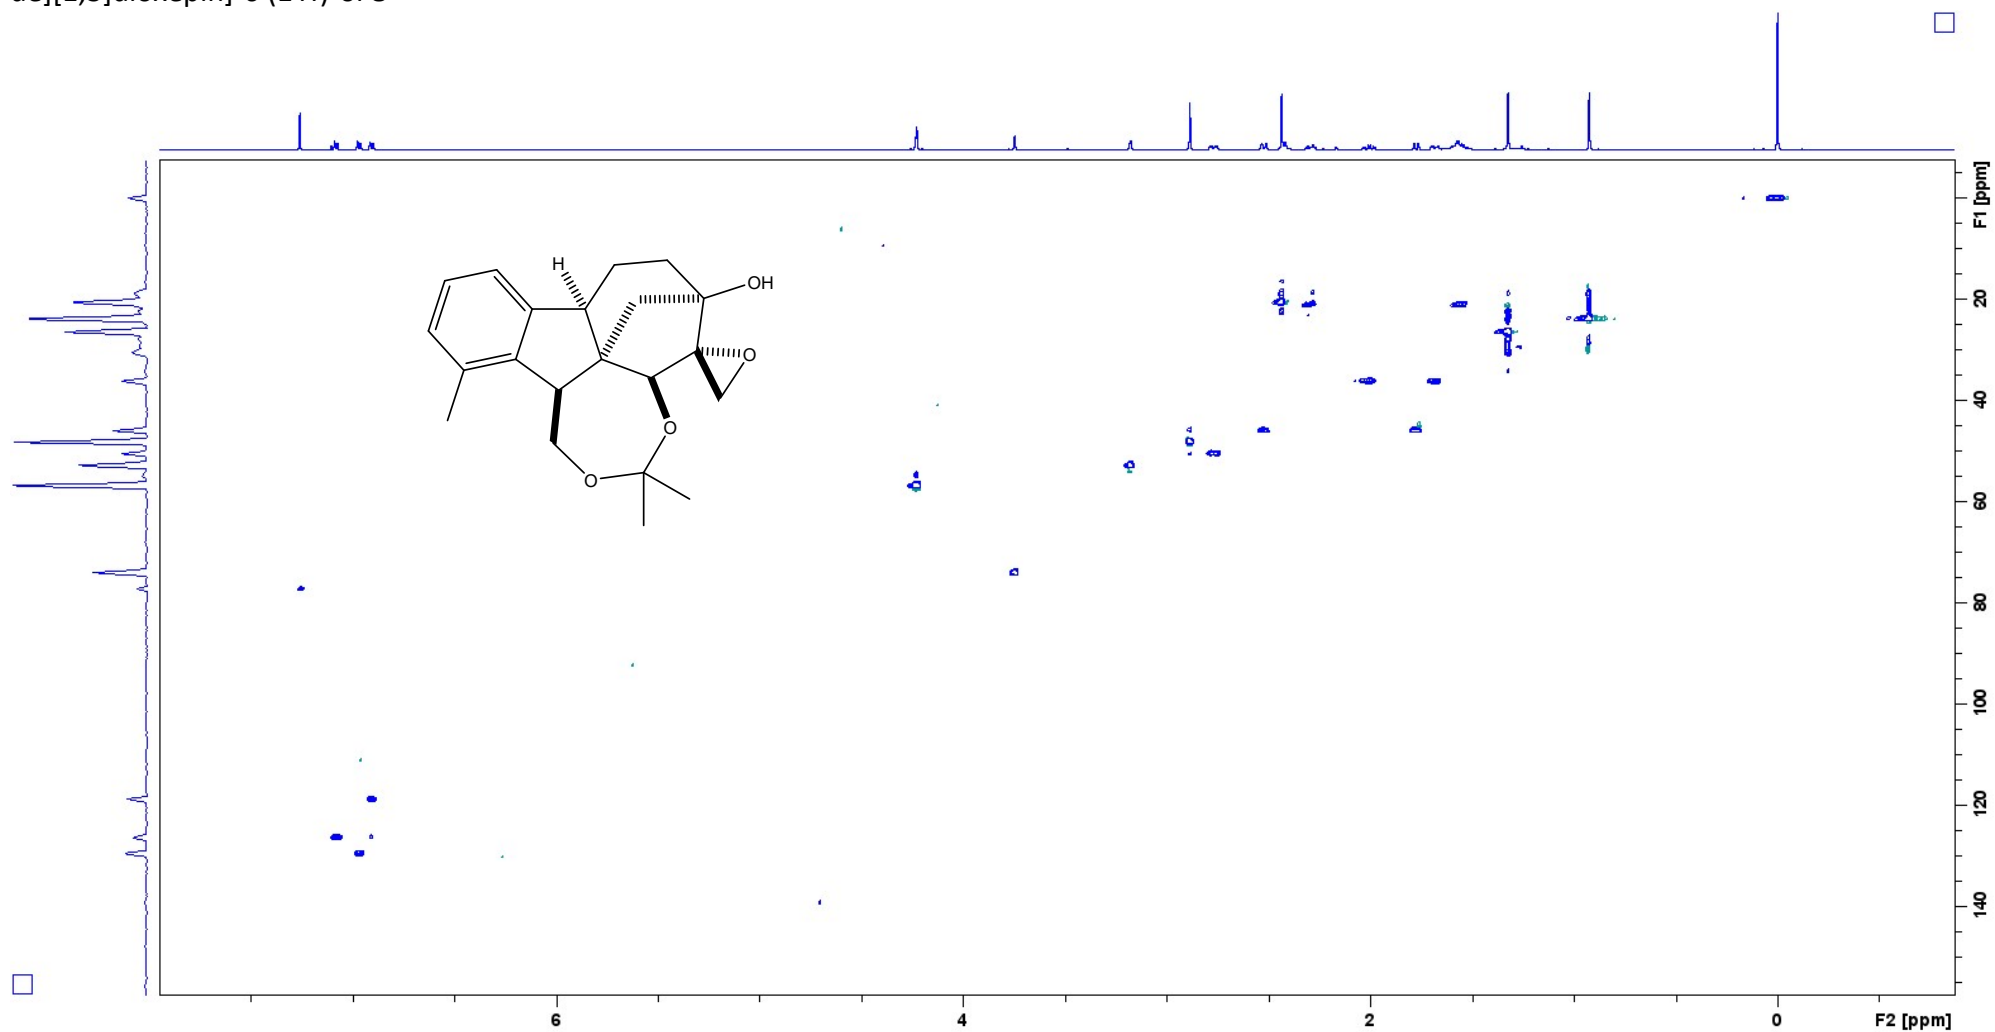

HMBC of (2*R*,4*a*'*S*,4*a*<sup>1</sup>*R*,6'*S*,12*b*'*S*)-3',3',12'-Trimethyl-7',8',8*a*',12*b*'-tetrahydro-4*a*'H-spiro[oxirane-2,5'-[4*a*<sup>1</sup>,6]methanobenzo[2,3]azuleno[8,1-de][1,3]dioxepin]-6'(1*H*)-ol **8**

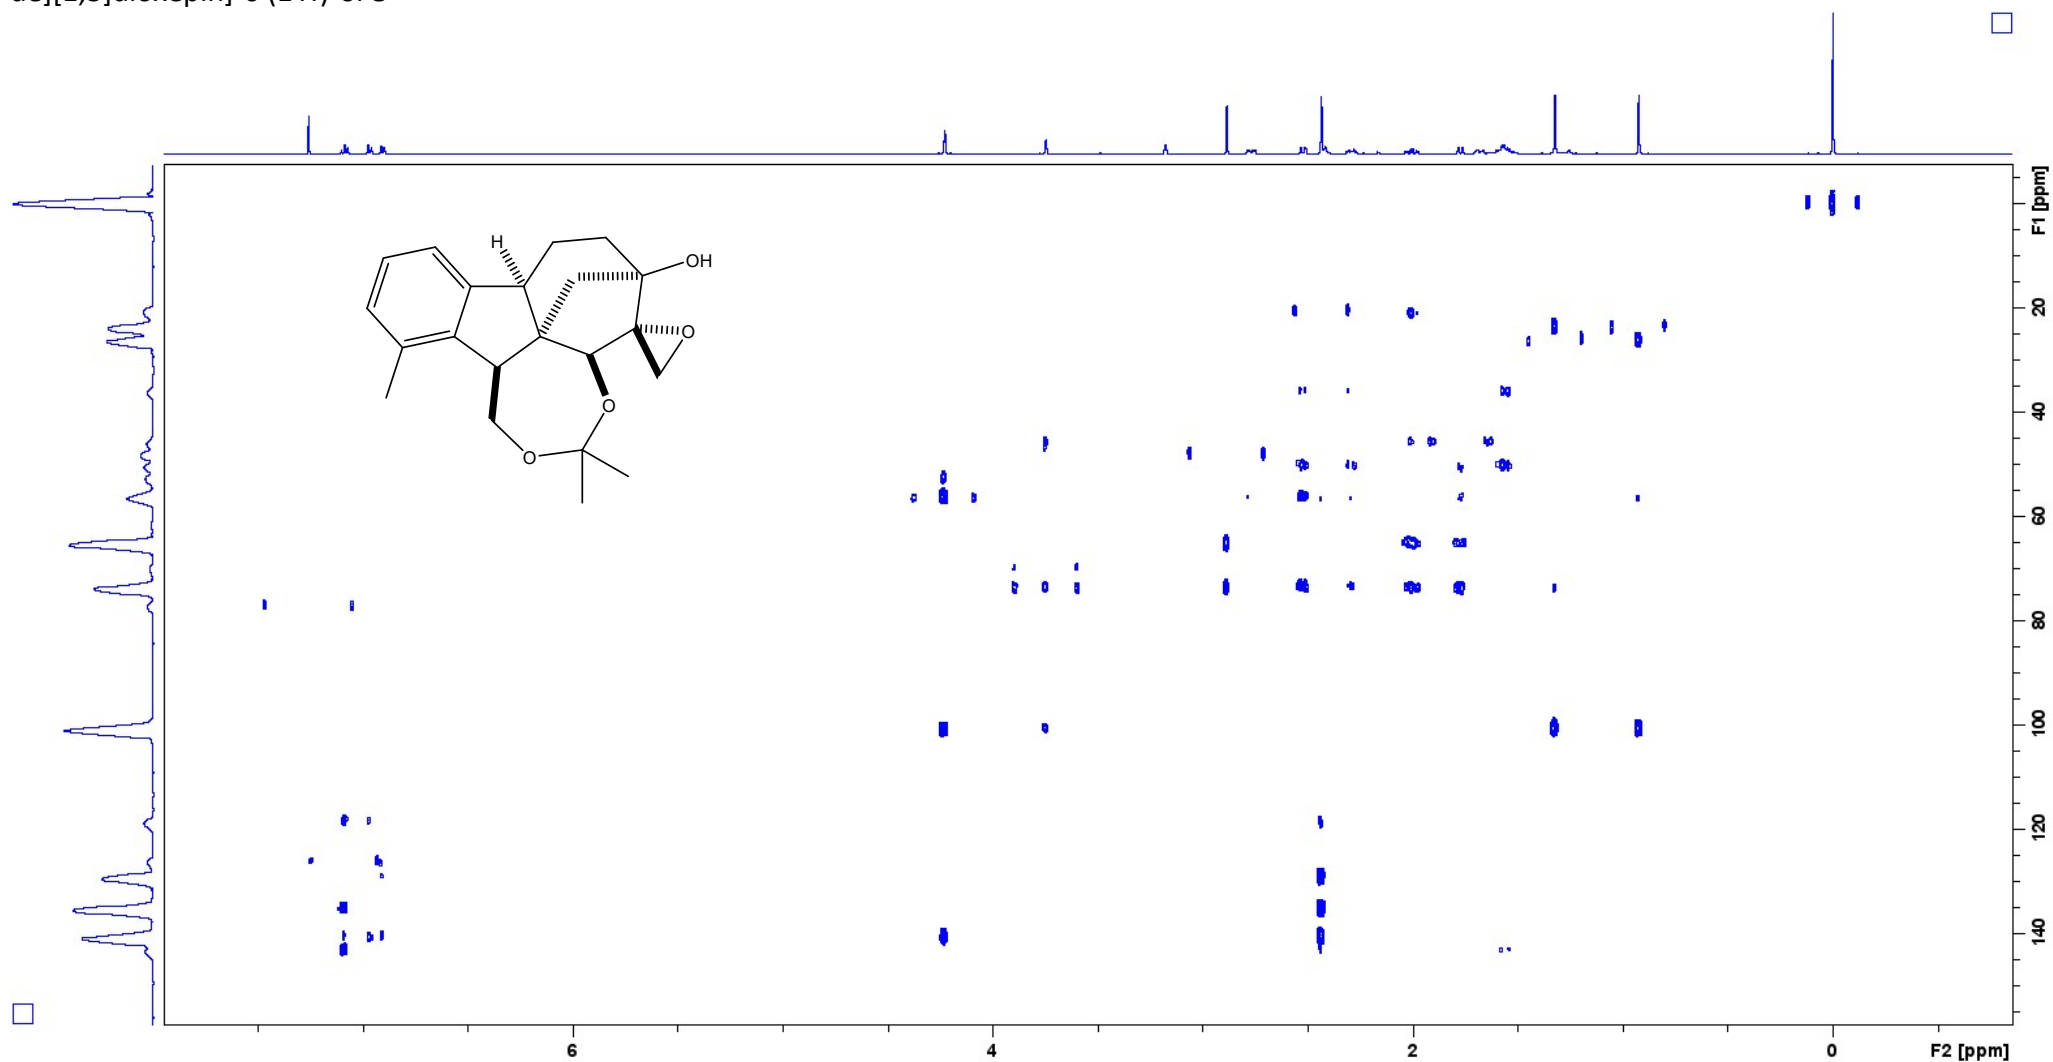



$^1\text{H-NMR}$  (500 MHz) of (4*aR*,4*a*<sup>1</sup>*R*,5*R*,6*S*,12*bS*)-5-(Azidomethyl)-3,3,12-trimethyl-4*a*,5,7,8,8*a*,12*b*-hexahydro-4*a*<sup>1</sup>,6-methanobenzo[2,3]azuleno[8,1-de][1,3]dioxepine-5,6(1*H*)-diol **29**

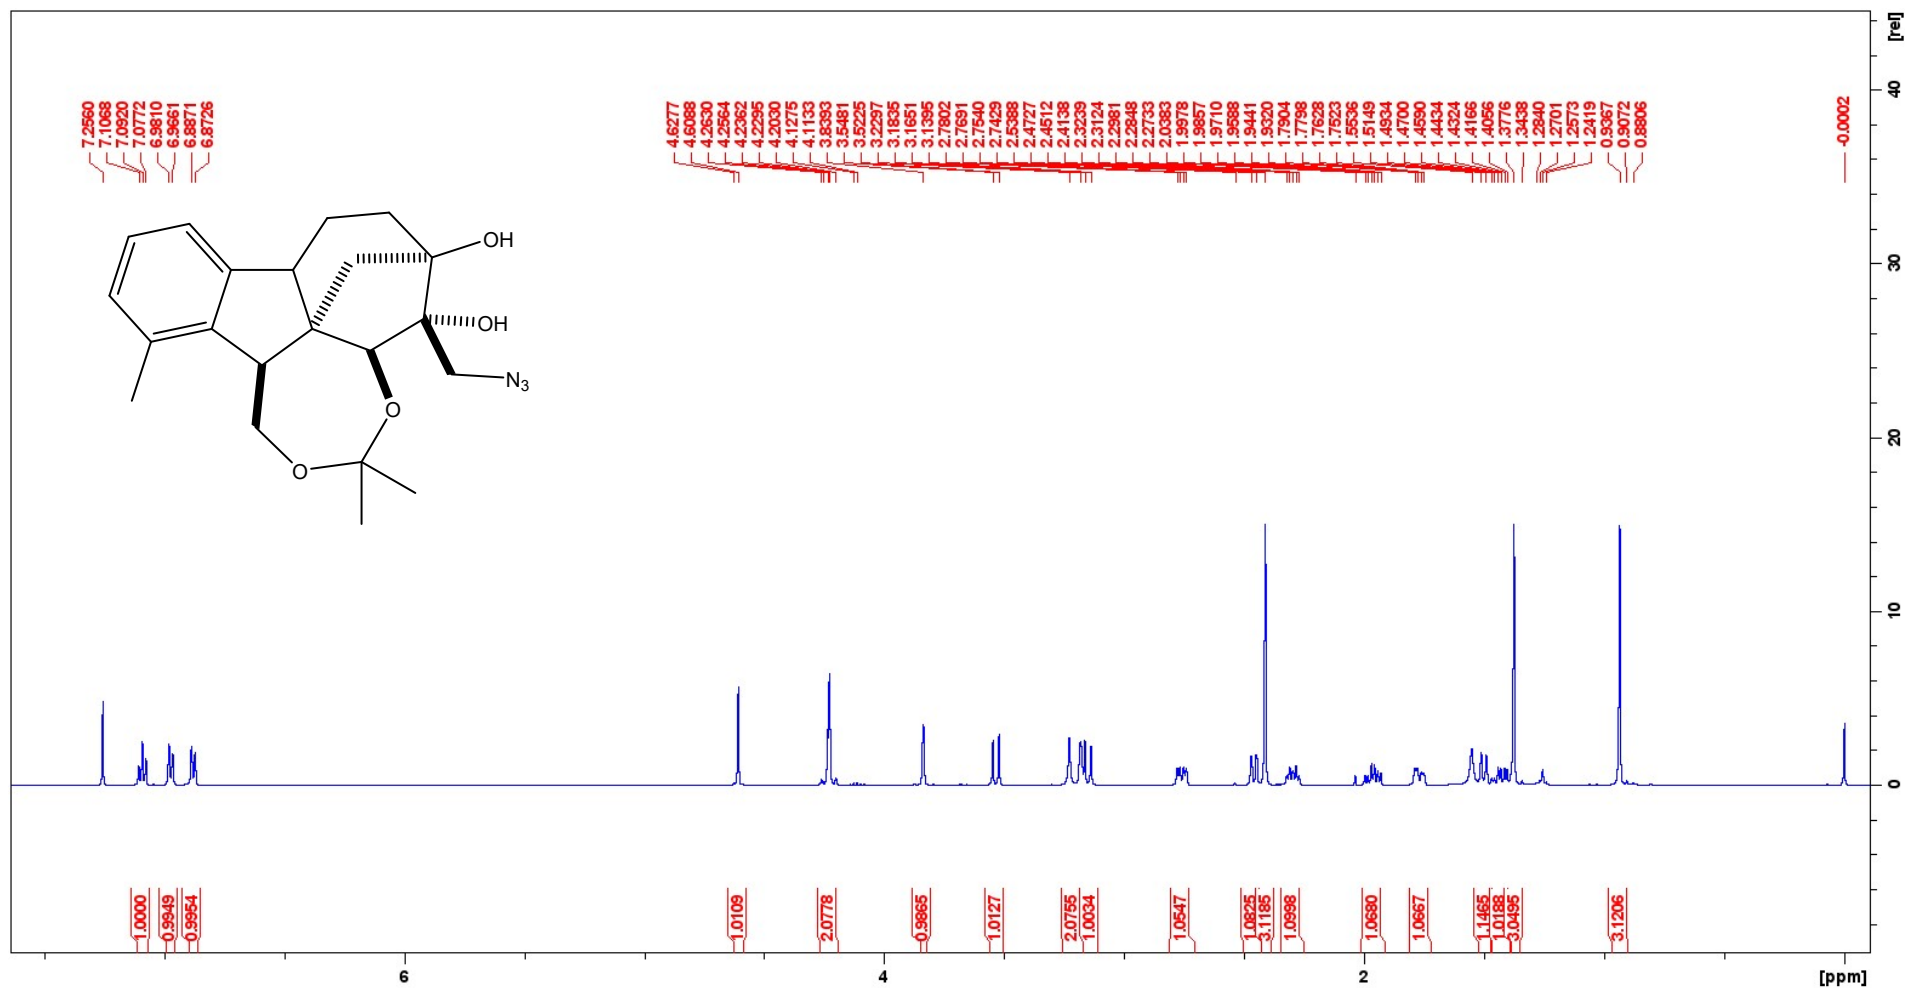

$^{13}\text{C}\{^1\text{H}\}$  J-MOD NMR (125 MHz) of (4aR,4a<sup>1</sup>R,5R,6S,12bS)-5-(Azidomethyl)-3,3,12-trimethyl-4a,5,7,8,8a,12b-hexahydro-4a<sup>1</sup>,6-methanobenzo[2,3]azuleno[8,1-de][1,3]dioxepine-5,6(1H)-diol **29**

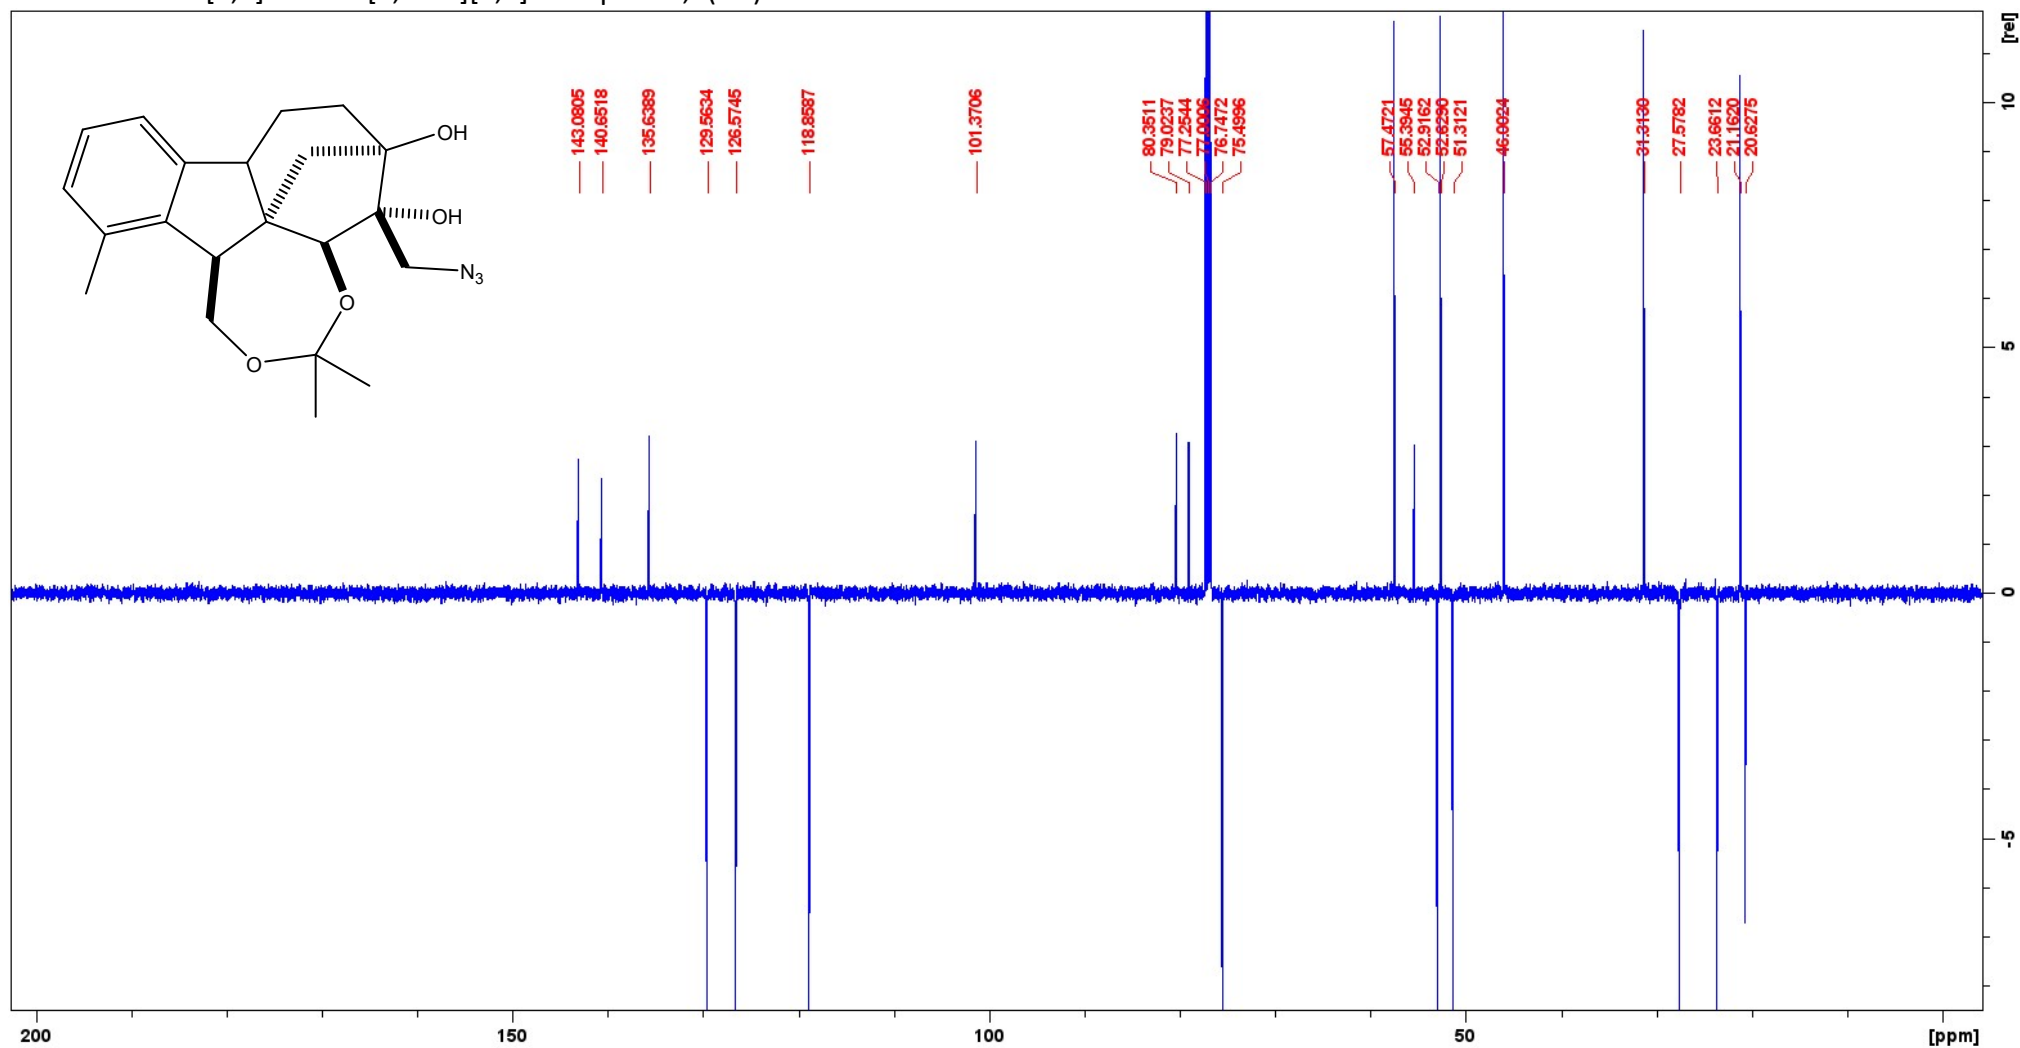

COSY of (4*R*,4*a*<sup>1</sup>*R*,5*R*,6*S*,12*bS*)-5-(Azidomethyl)-3,3,12-trimethyl-4*a*,5,7,8,8*a*,12*b*-hexahydro-4*a*<sup>1</sup>,6-methanobenzo[2,3]azuleno[8,1-de][1,3]dioxepine-5,6(1*H*)-diol **29**

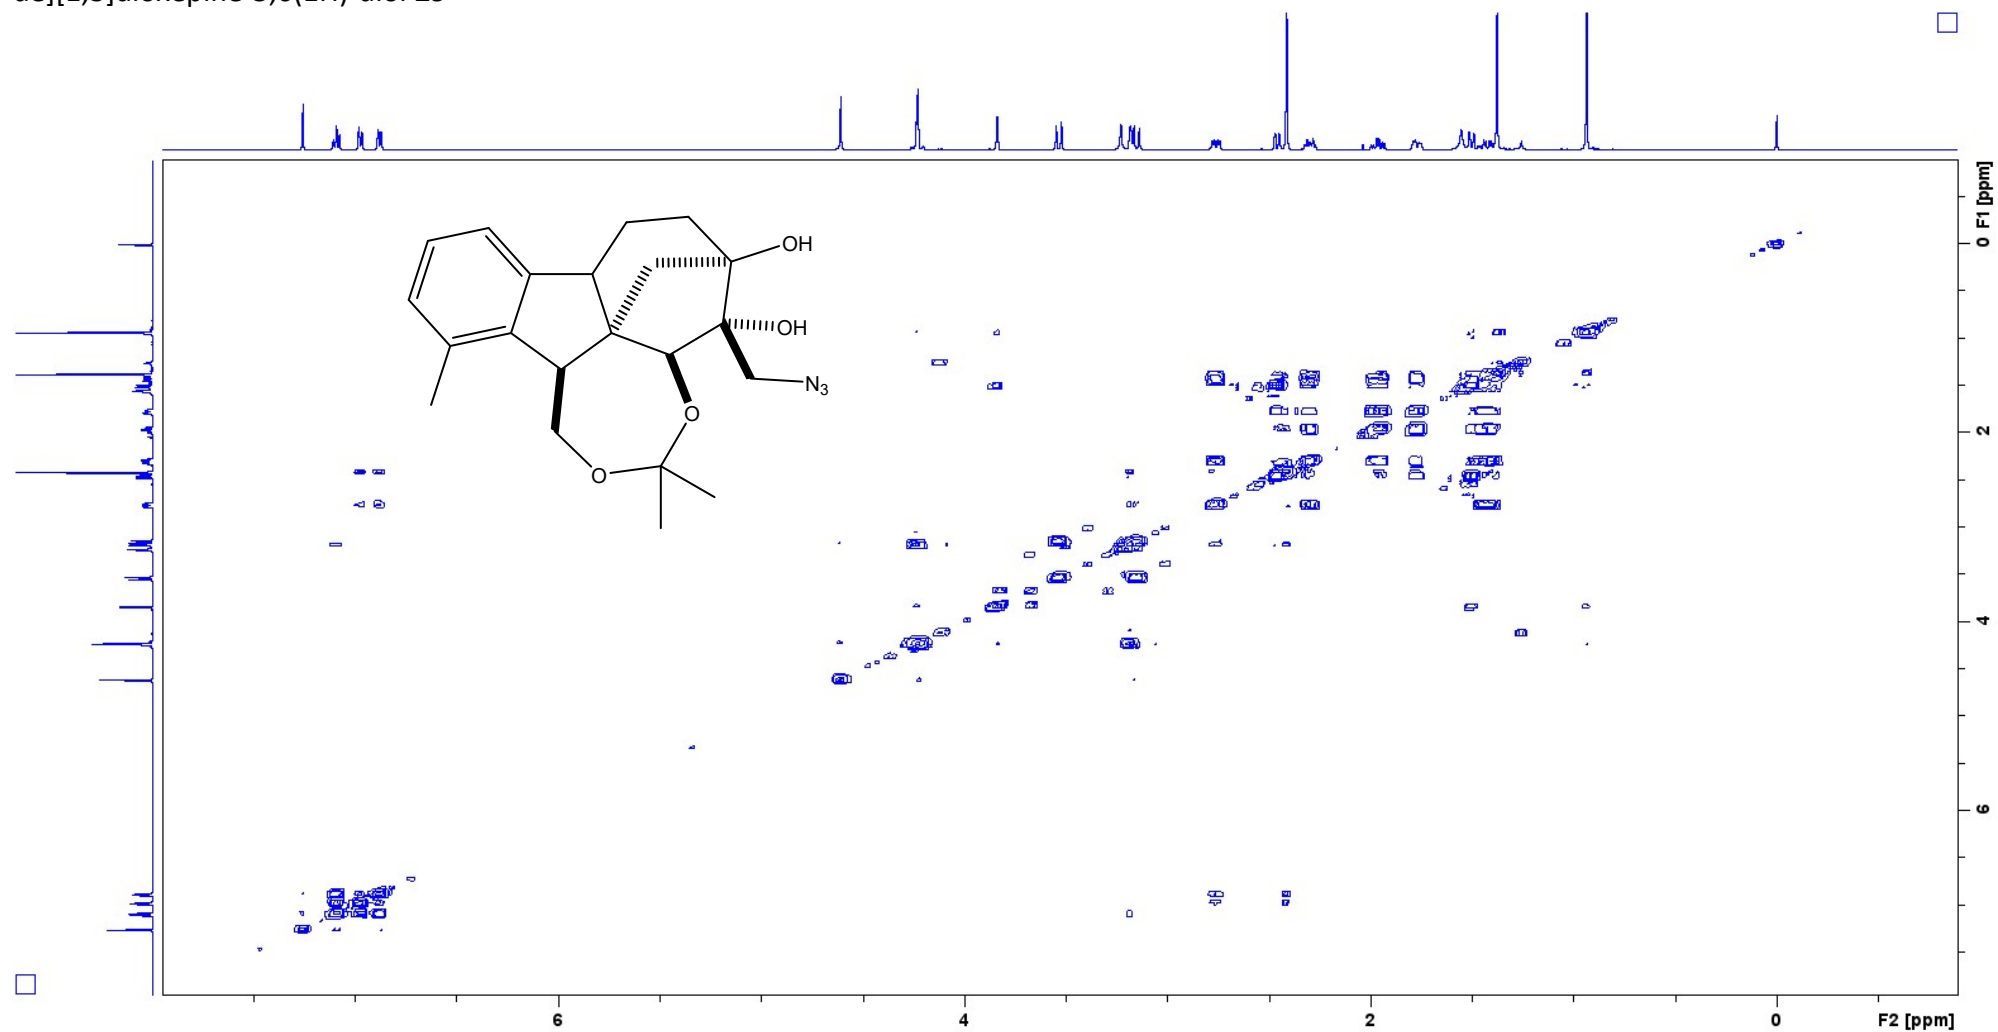

NOESY of (4*a**R*,4*a*<sup>1</sup>*R*,5*R*,6*S*,12*b**S*)-5-(Azidomethyl)-3,3,12-trimethyl-4*a*,5,7,8,8*a*,12*b*-hexahydro-4*a*<sup>1</sup>,6-methanobenzo[2,3]azuleno[8,1-de][1,3]dioxepine-5,6(1*H*)-diol **29**

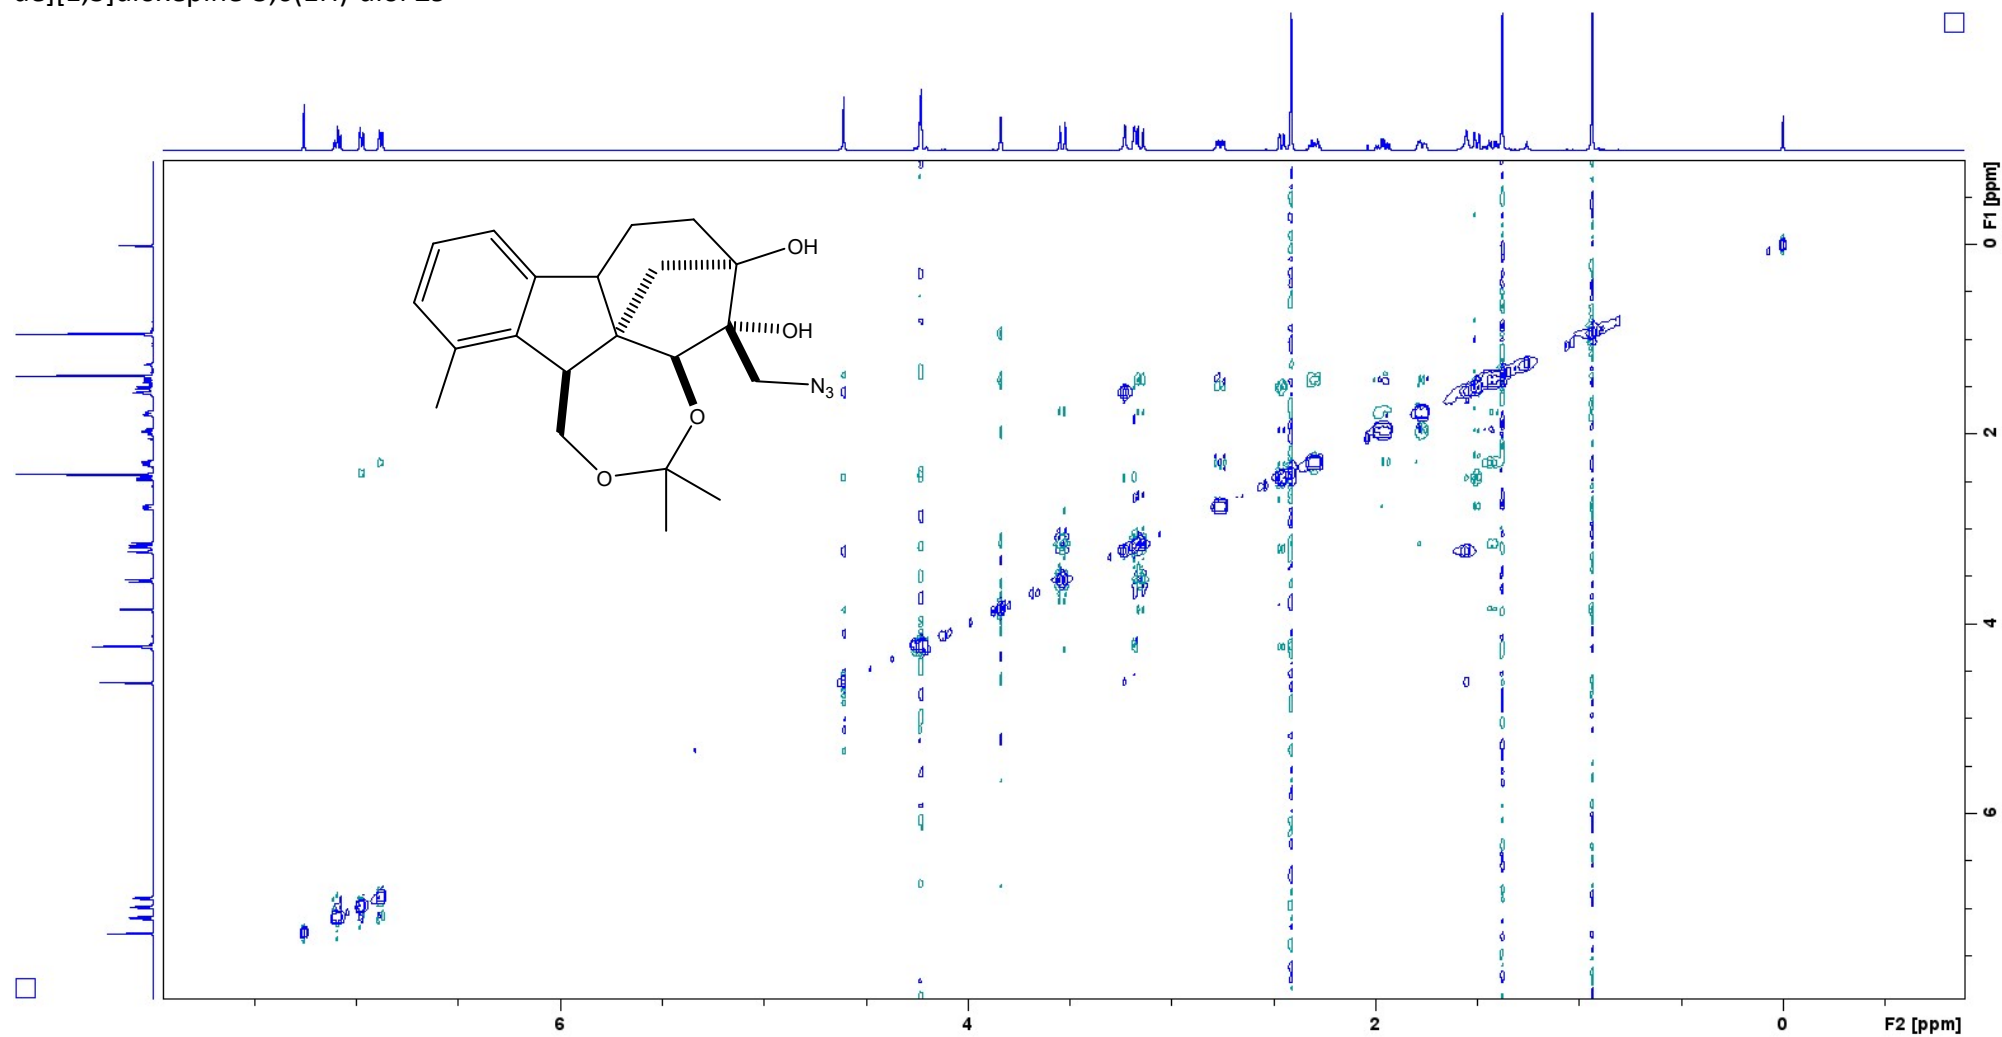

HSQC of (4*R*,4*a*<sup>1</sup>*R*,5*R*,6*S*,12*bS*)-5-(Azidomethyl)-3,3,12-trimethyl-4*a*,5,7,8,8*a*,12*b*-hexahydro-4*a*<sup>1</sup>,6-methanobenzo[2,3]azuleno[8,1-de][1,3]dioxepine-5,6(1*H*)-diol **29**

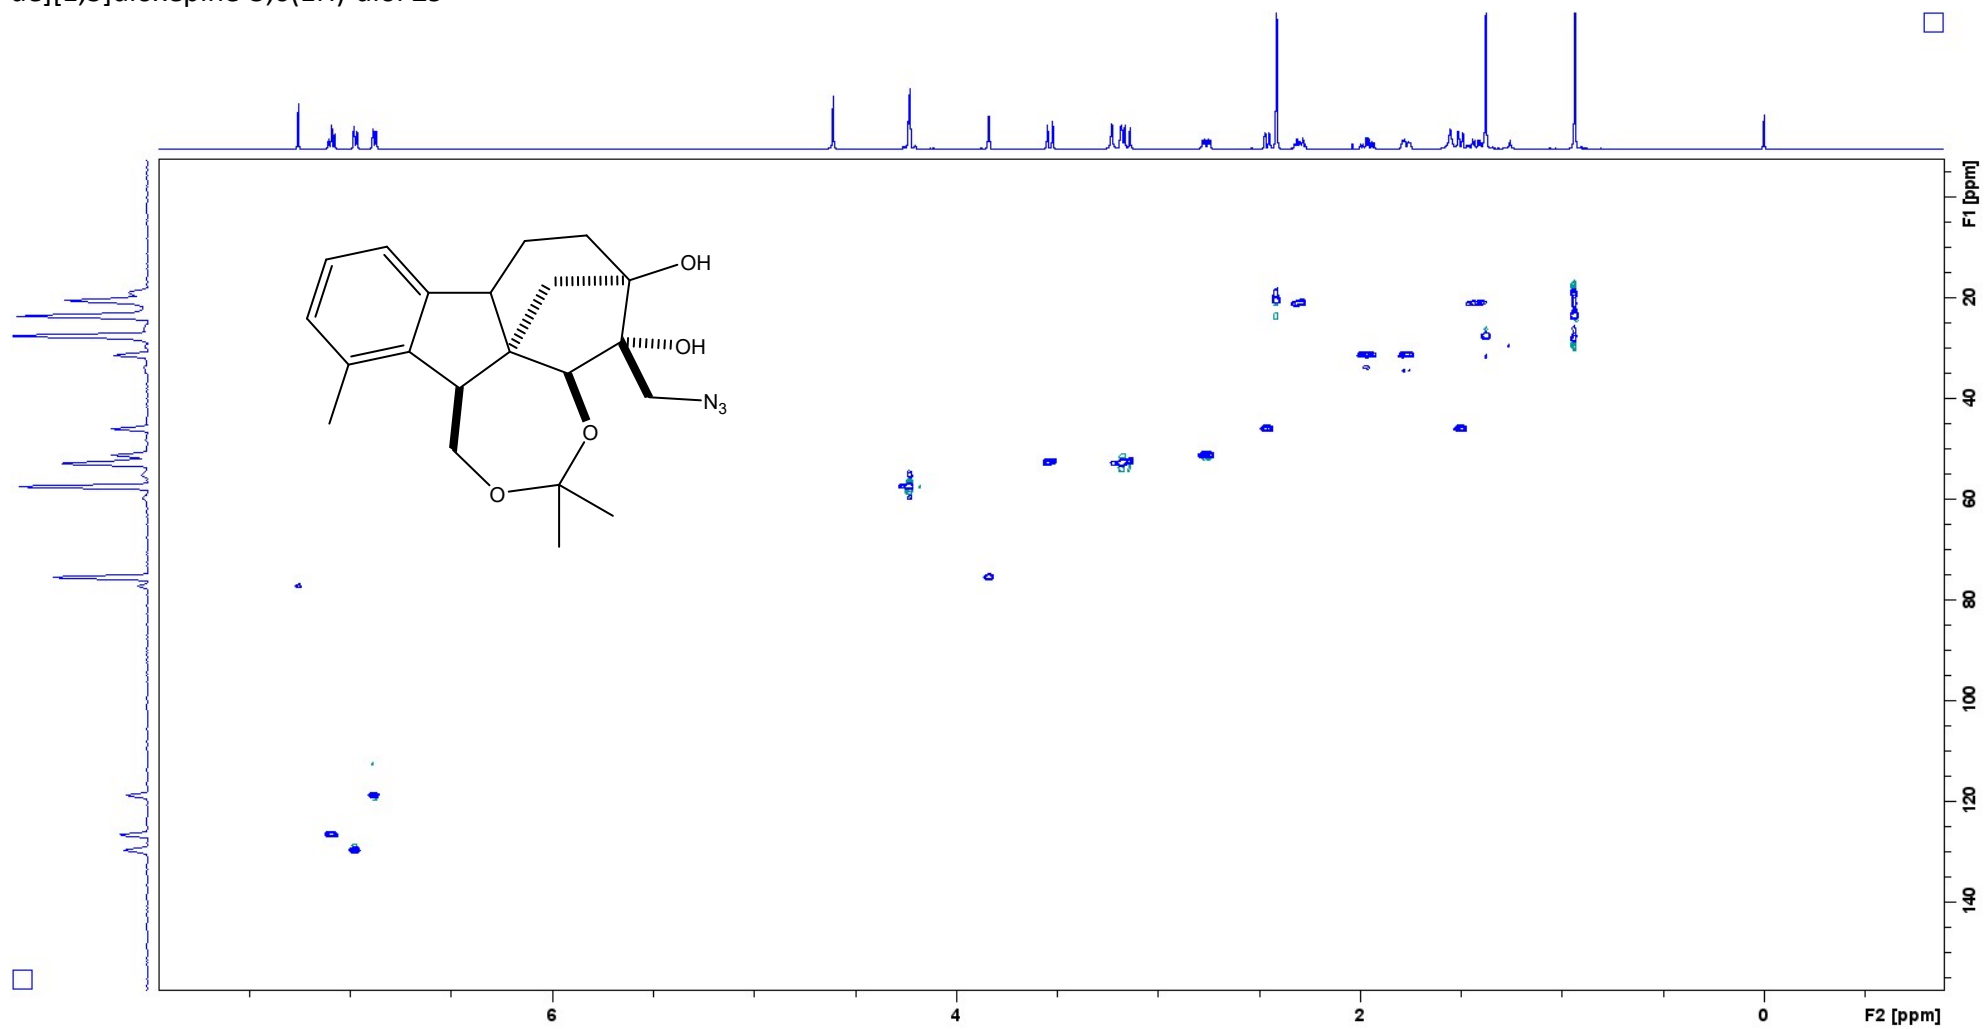

HMBC of (4*aR*,4*a*<sup>1</sup>*R*,5*R*,6*S*,12*bS*)-5-(Azidomethyl)-3,3,12-trimethyl-4*a*,5,7,8,8*a*,12*b*-hexahydro-4*a*<sup>1</sup>,6-methanobenzo[2,3]azuleno[8,1-de][1,3]dioxepine-5,6(1*H*)-diol **29**

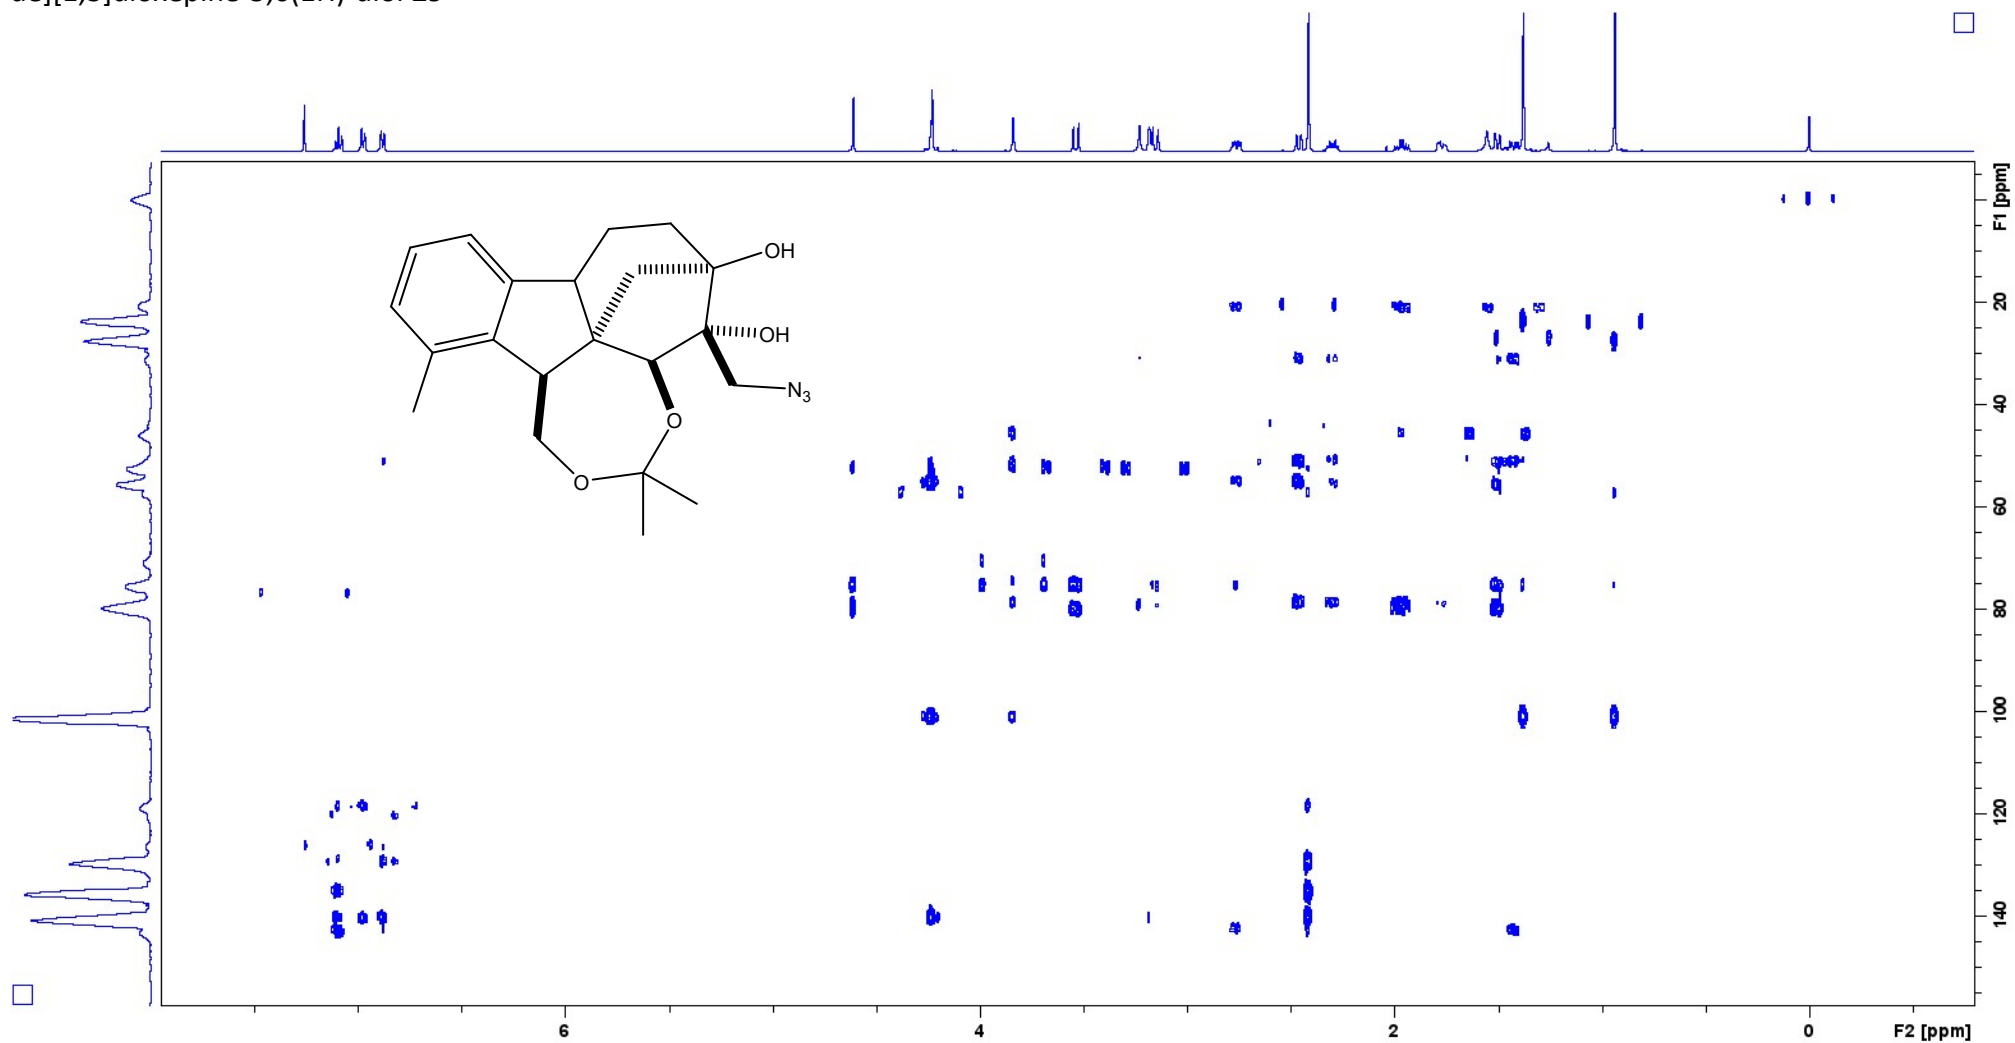

$^1\text{H-NMR}$  (500 MHz) of (4a*S*,4a<sup>1</sup>*R*,5*R*,6*S*,12*bS*)-5-((Benzylamino)methyl)-3,3,12-trimethyl-4a,5,7,8,8a,12*b*-hexahydro-4a<sup>1</sup>,6-methanobenzo[2,3]azuleno[8,1-*de*][1,3]dioxepine-5,6(1*H*)-diol **9**

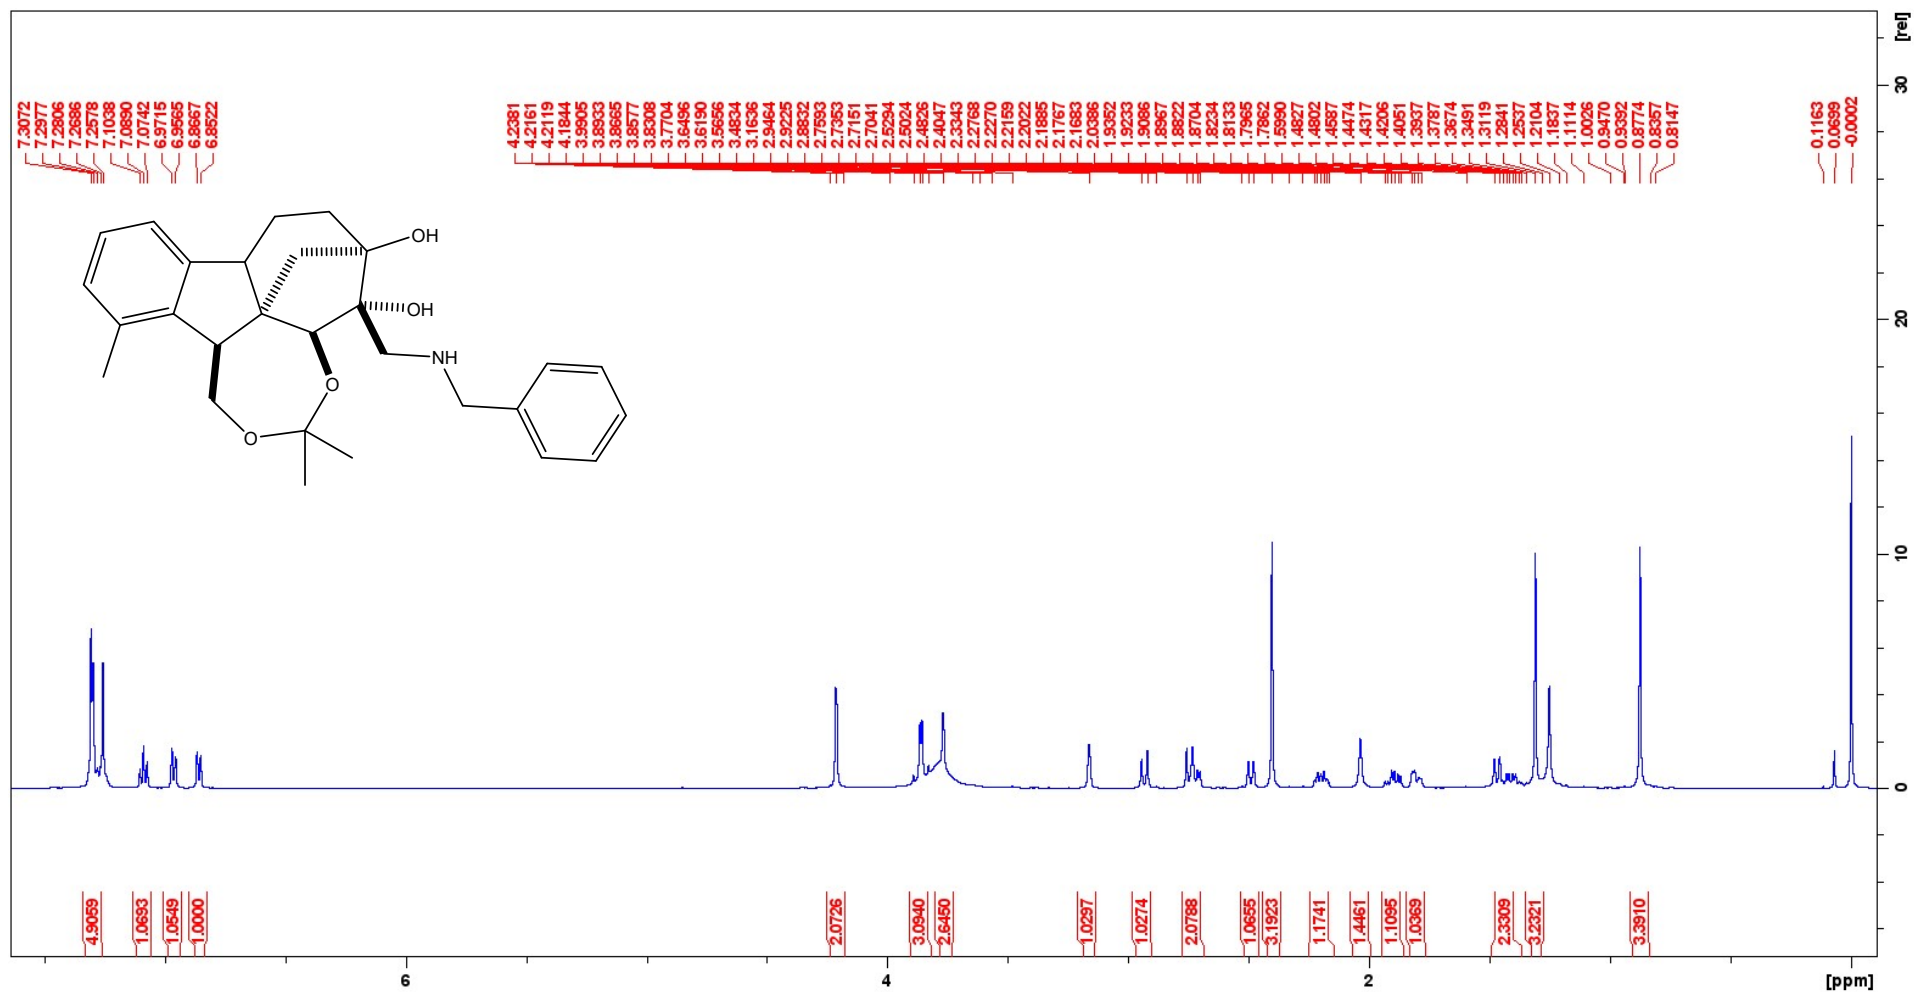

$^{13}\text{C}\{^1\text{H}\}$  J-MOD NMR (125 MHz) of (4a*S*,4a<sup>1</sup>*R*,5*R*,6*S*,12*bS*)-5-((Benzylamino)methyl)-3,3,12-trimethyl-4a,5,7,8,8a,12*b*-hexahydro-4a<sup>1</sup>,6-methanobenzo[2,3]azuleno[8,1-*de*][1,3]dioxepine-5,6(1*H*)-diol **9**

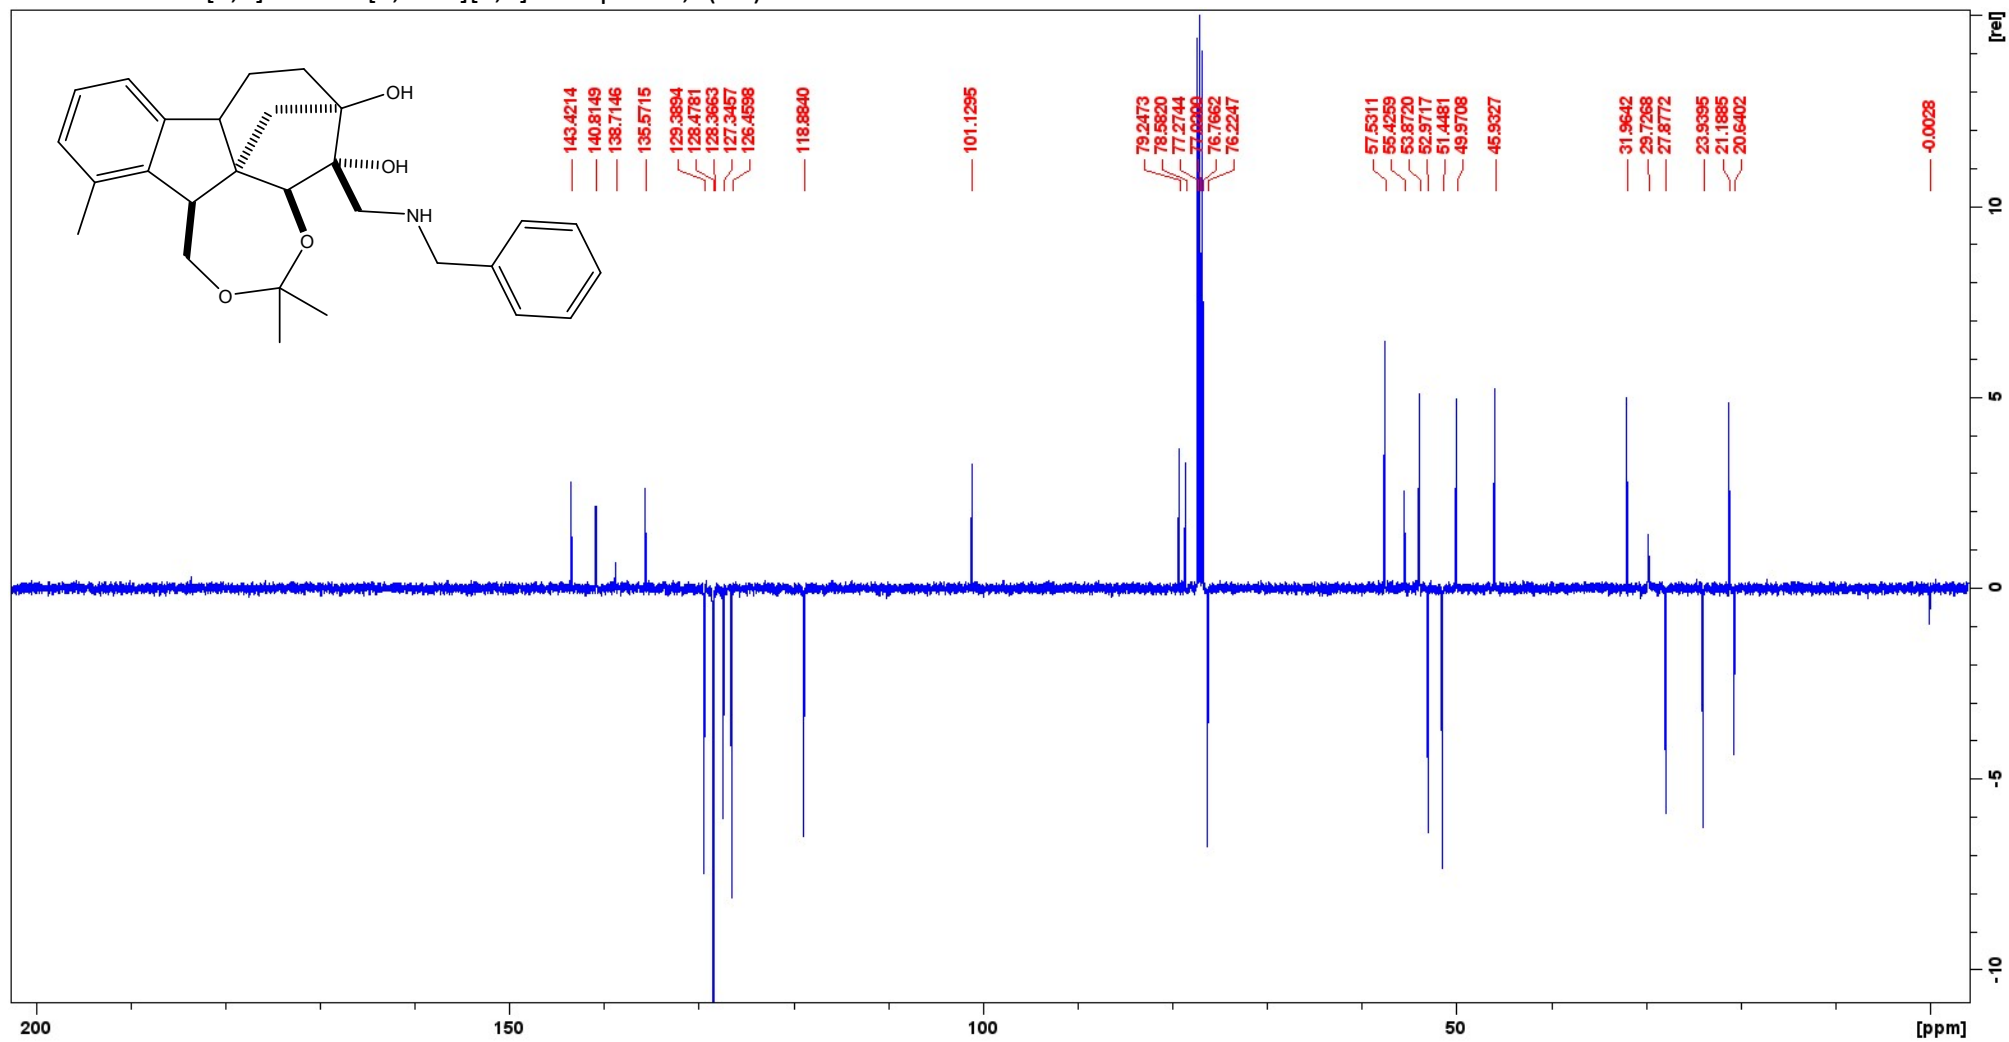



COSY of (4a*S*,4a<sup>1</sup>*R*,5*R*,6*S*,12*bS*)-5-((Benzylamino)methyl)-3,3,12-trimethyl-4a,5,7,8,8a,12*b*-hexahydro-4a<sup>1</sup>,6-methanobenzo[2,3]azuleno[8,1-de][1,3]dioxepine-5,6(1*H*)-diol **9**

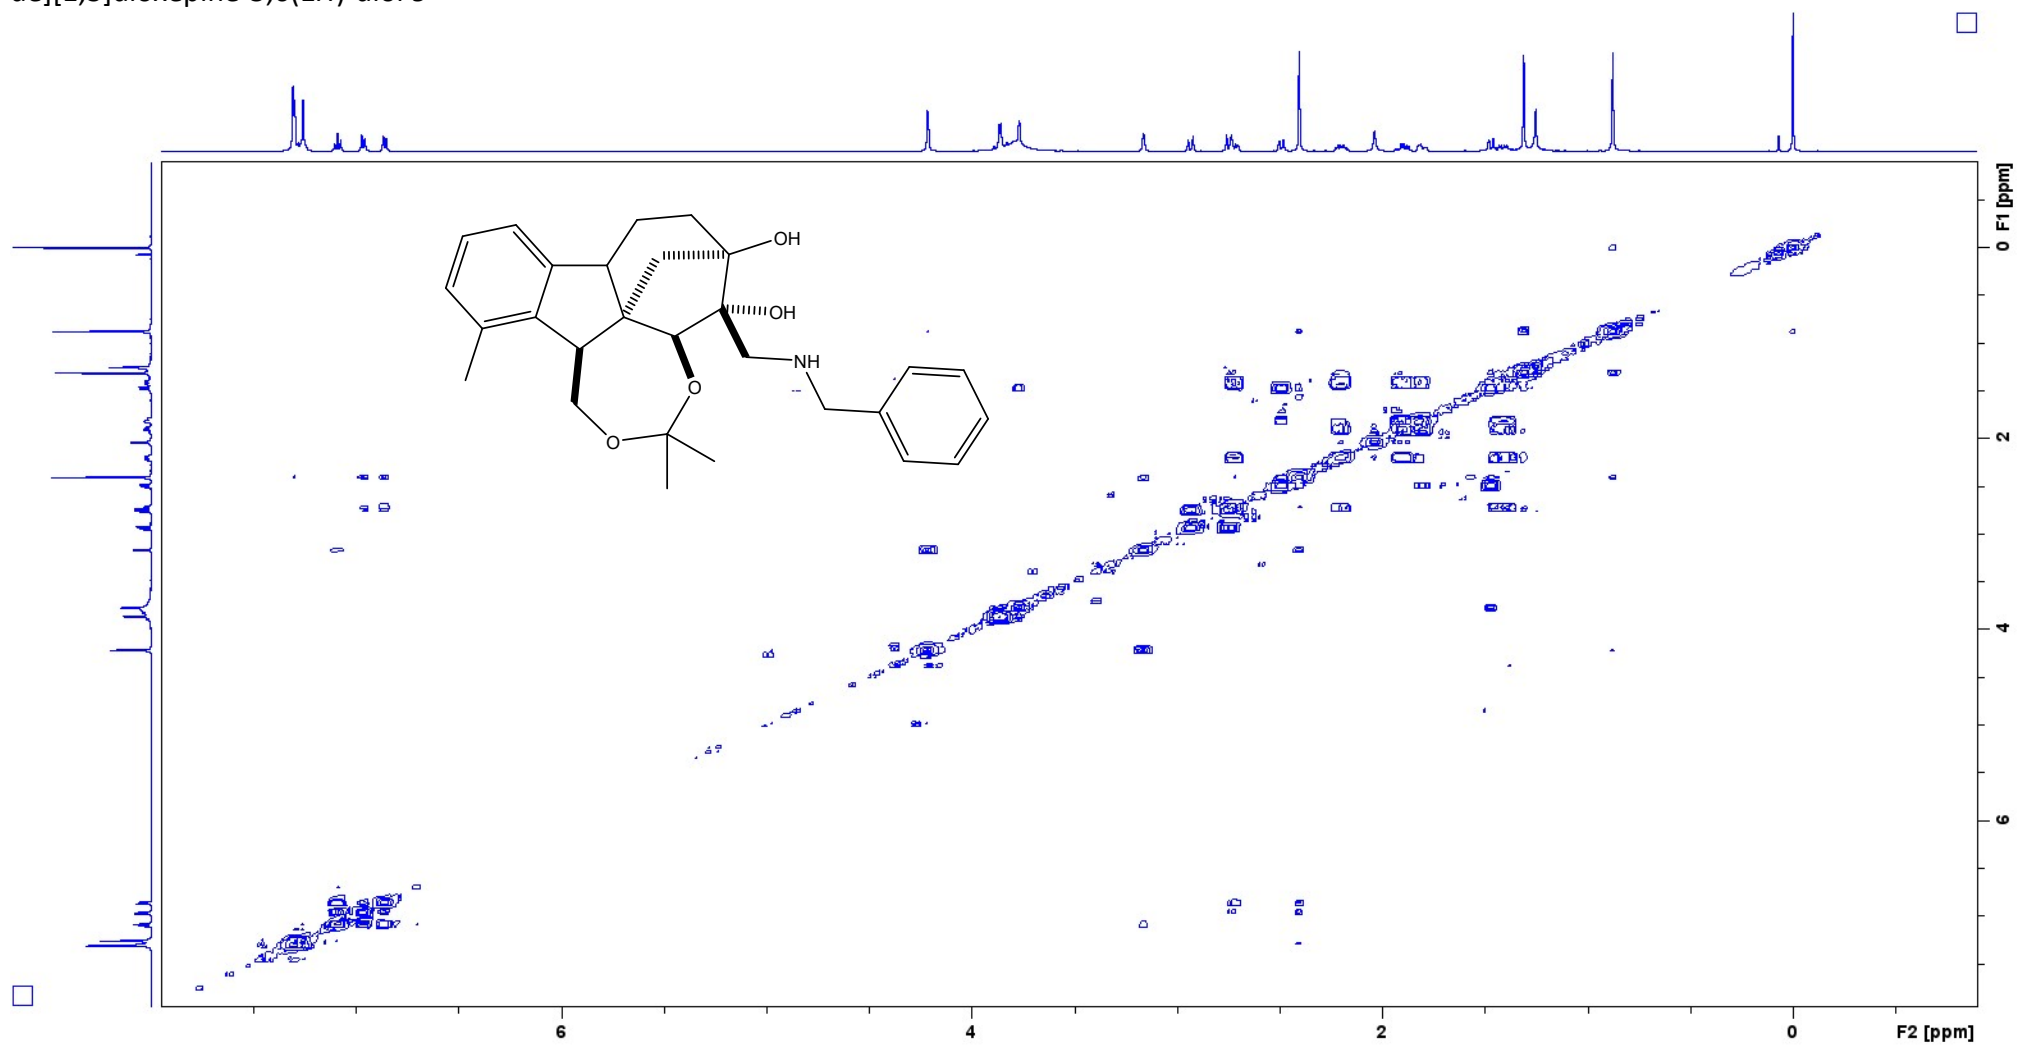

NOESY of (4*a*S,4*a*<sup>1</sup>*R*,5*R*,6*S*,12*b**S*)-5-((Benzylamino)methyl)-3,3,12-trimethyl-4*a*,5,7,8,8*a*,12*b*-hexahydro-4*a*<sup>1</sup>,6-methanobenzo[2,3]azuleno[8,1-de][1,3]dioxepine-5,6(1*H*)-diol **9**

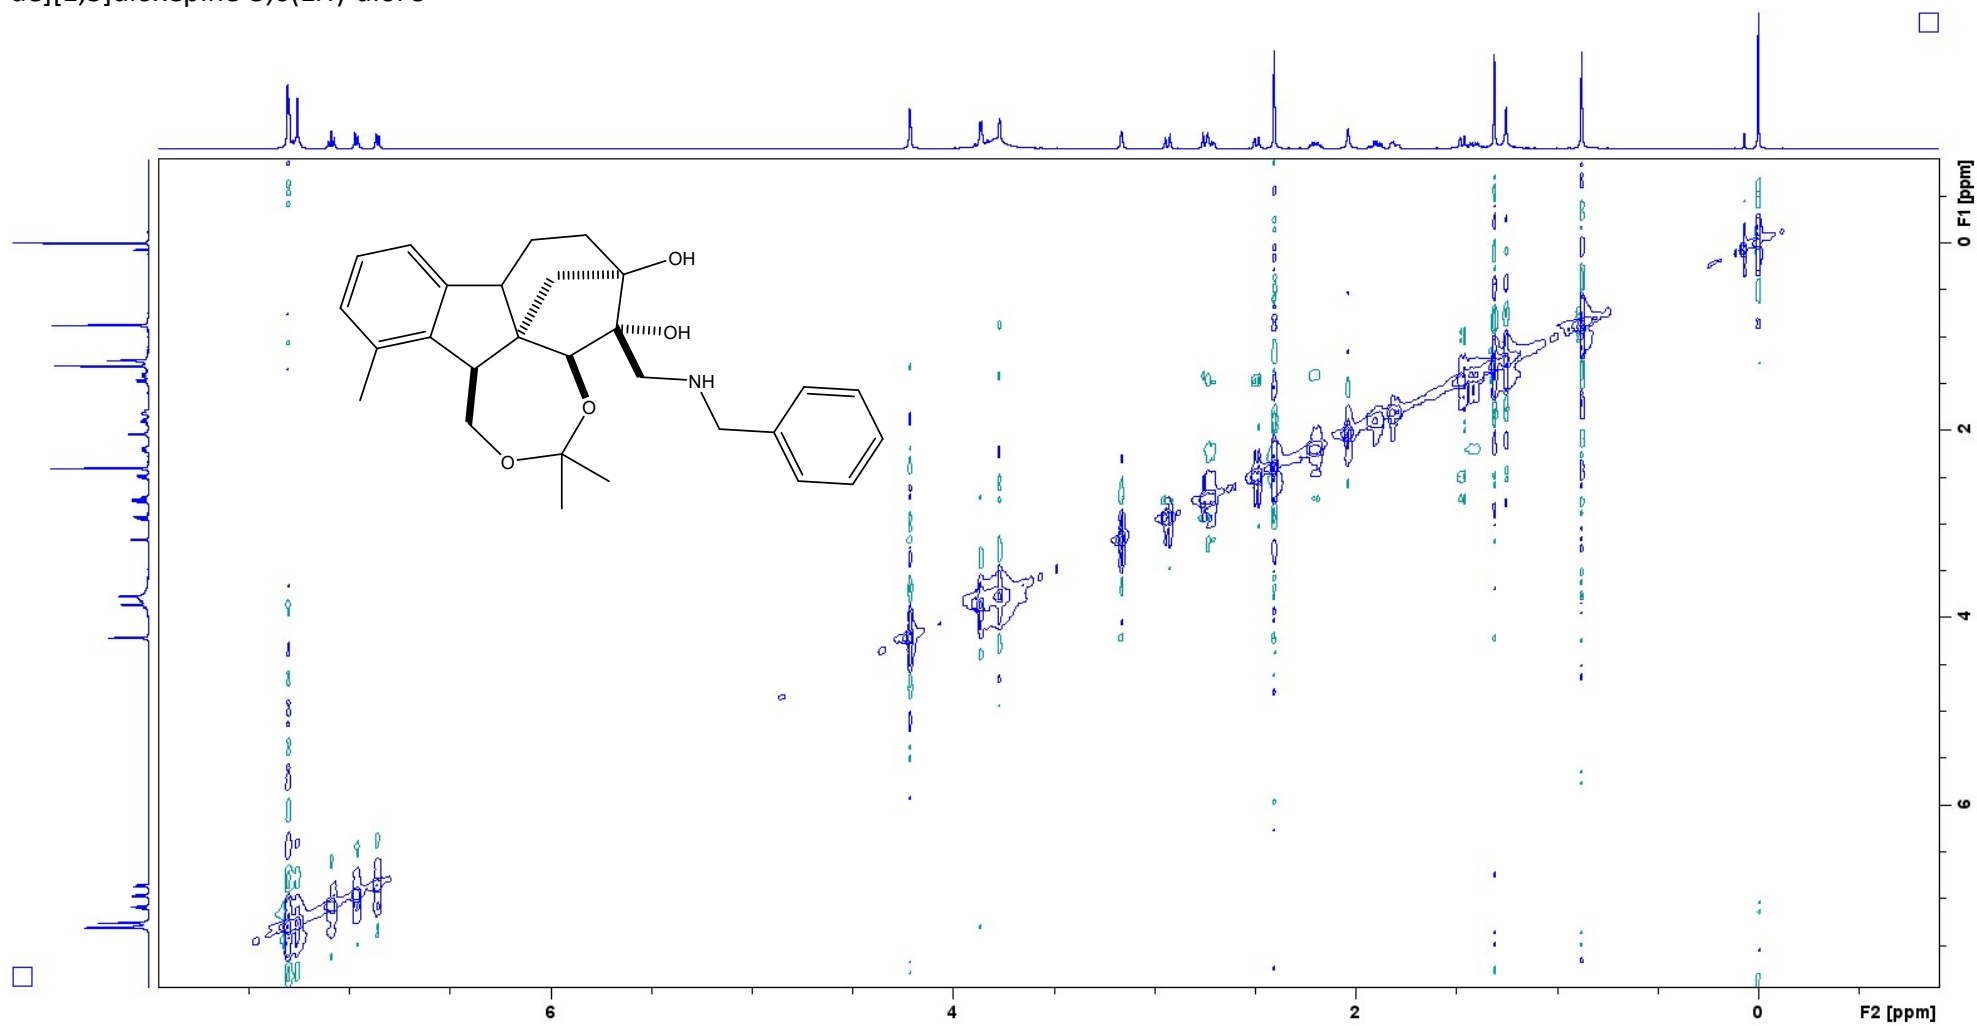

HSQC of (4a*S*,4a<sup>1</sup>*R*,5*R*,6*S*,12b*S*)-5-((Benzylamino)methyl)-3,3,12-trimethyl-4a,5,7,8,8a,12b-hexahydro-4a<sup>1</sup>,6-methanobenzo[2,3]azuleno[8,1-de][1,3]dioxepine-5,6(1*H*)-diol **9**

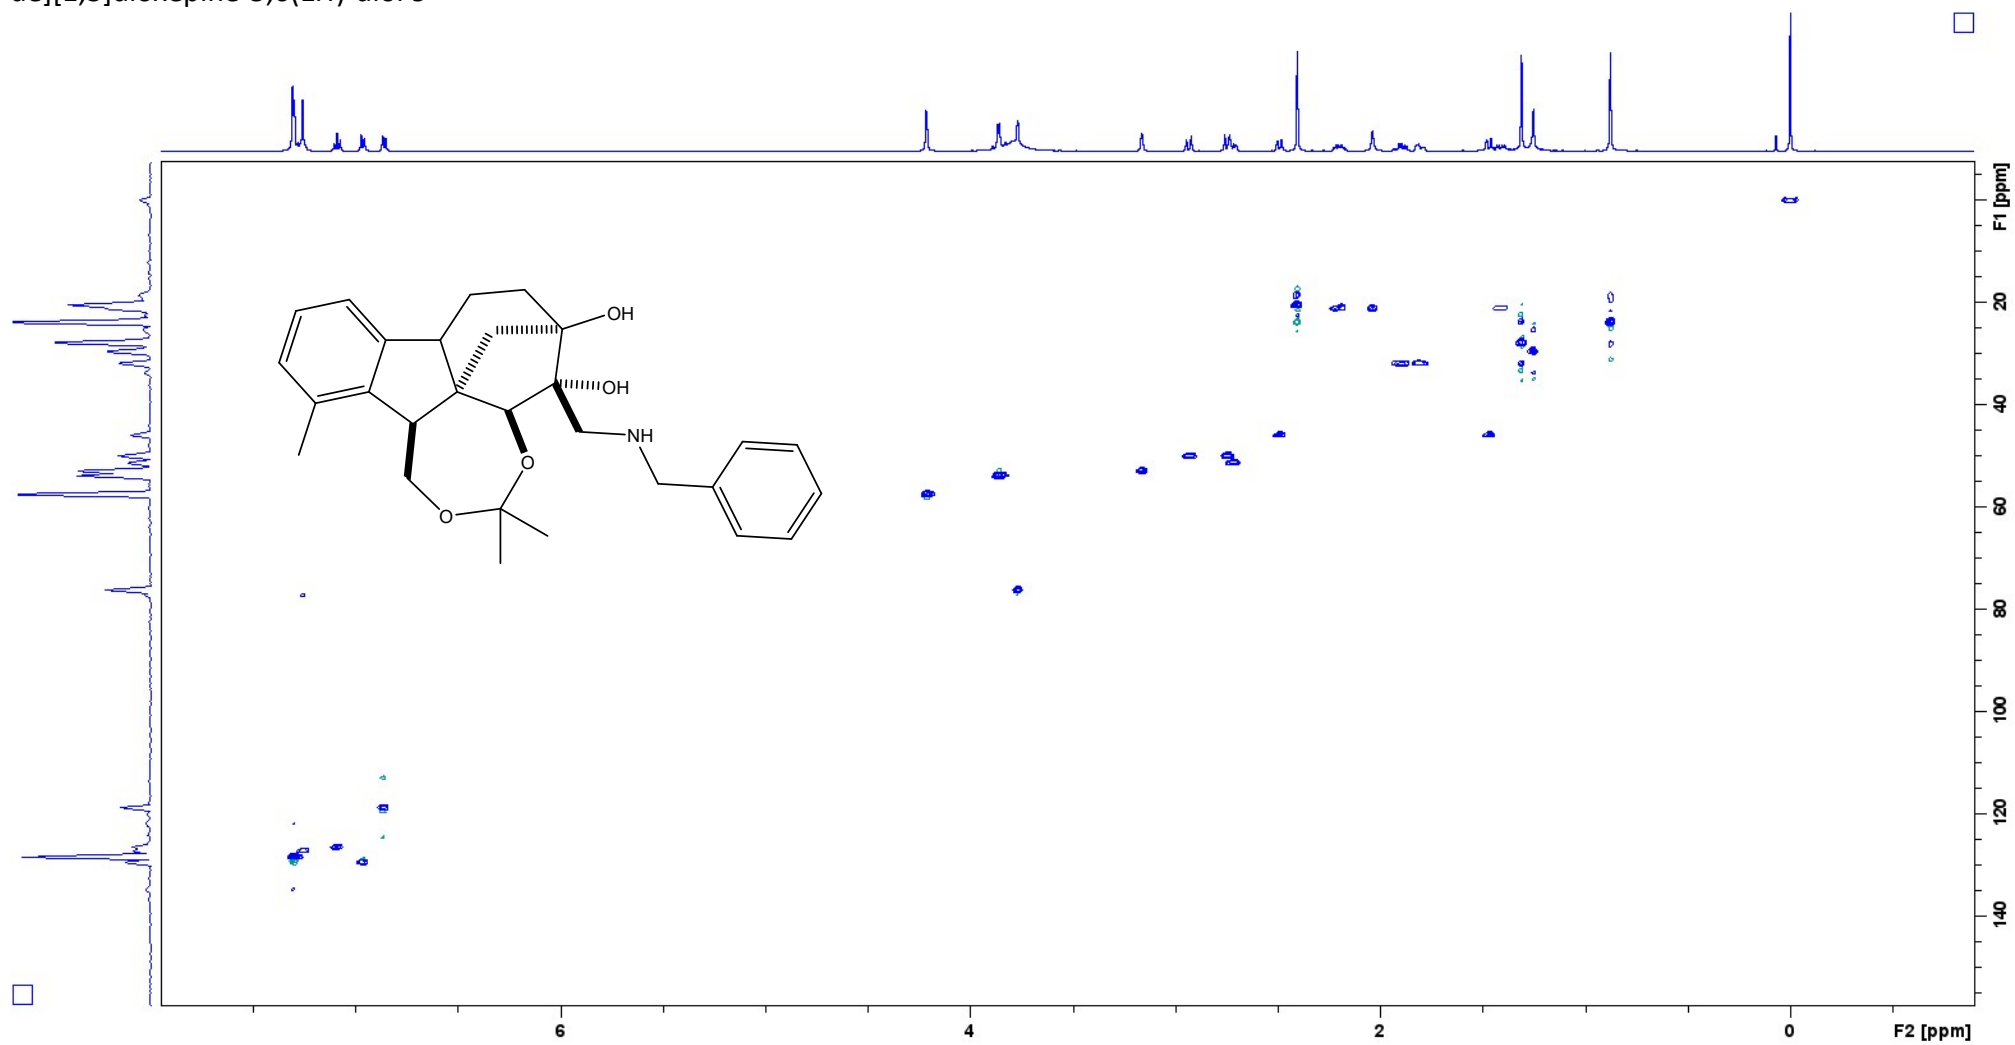



$^1\text{H-NMR}$  (500 MHz) of (4*S*,4*a*<sup>1</sup>*R*,5*R*,6*S*,12*bS*)-5-(((4-Fluorobenzyl)amino)methyl)-3,3,12-trimethyl-4*a*,5,7,8,8*a*,12*b*-hexahydro-4*a*<sup>1</sup>,6-methanobenzo[2,3]azuleno[8,1-*de*][1,3]dioxepine-5,6(1*H*)-diol **10**

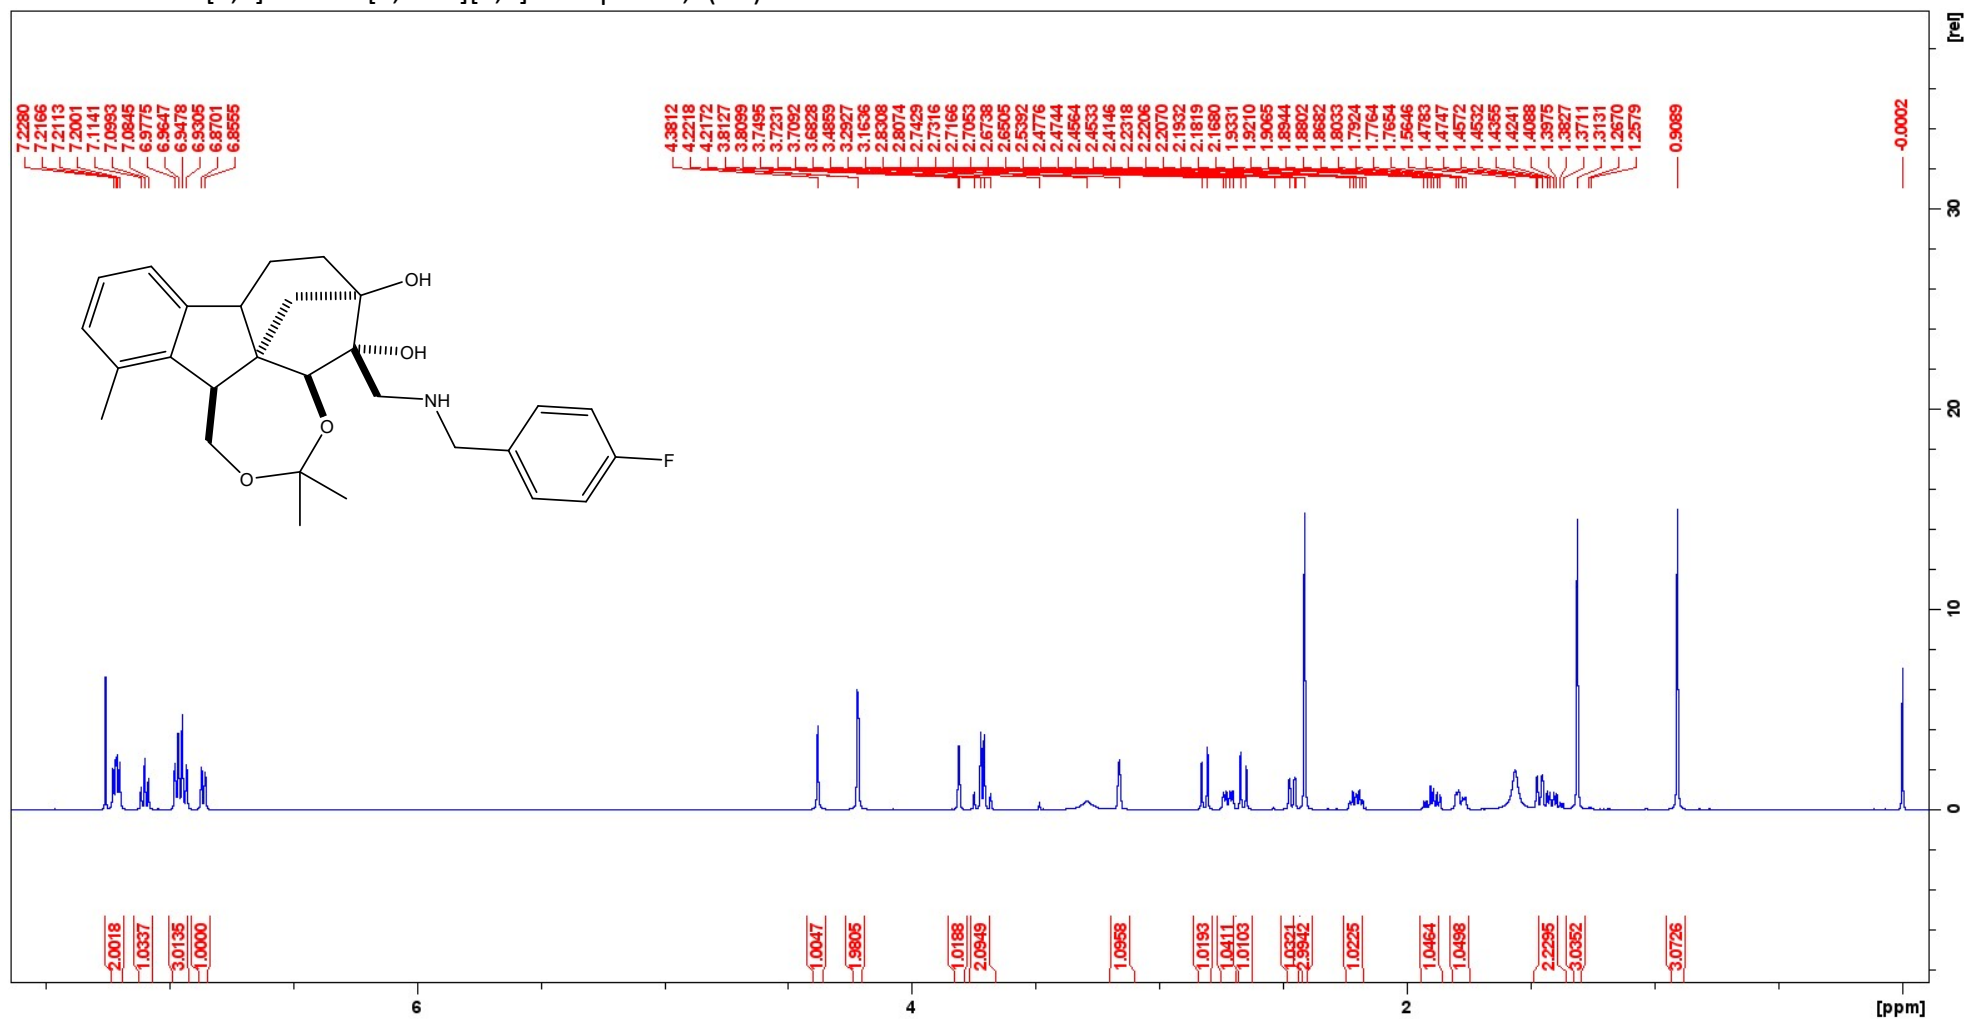

$^{13}\text{C}\{^1\text{H}\}$  J-MOD NMR (125 MHz) of (4*a*S,4*a*<sup>1</sup>*R*,5*R*,6*S*,12*b**S*)-5-(((4-Fluorobenzyl)amino)methyl)-3,3,12-trimethyl-4*a*,5,7,8,8*a*,12*b*-hexahydro-4*a*<sup>1</sup>,6-methanobenzo[2,3]azuleno[8,1-*de*][1,3]dioxepine-5,6(1*H*)-diol **10**

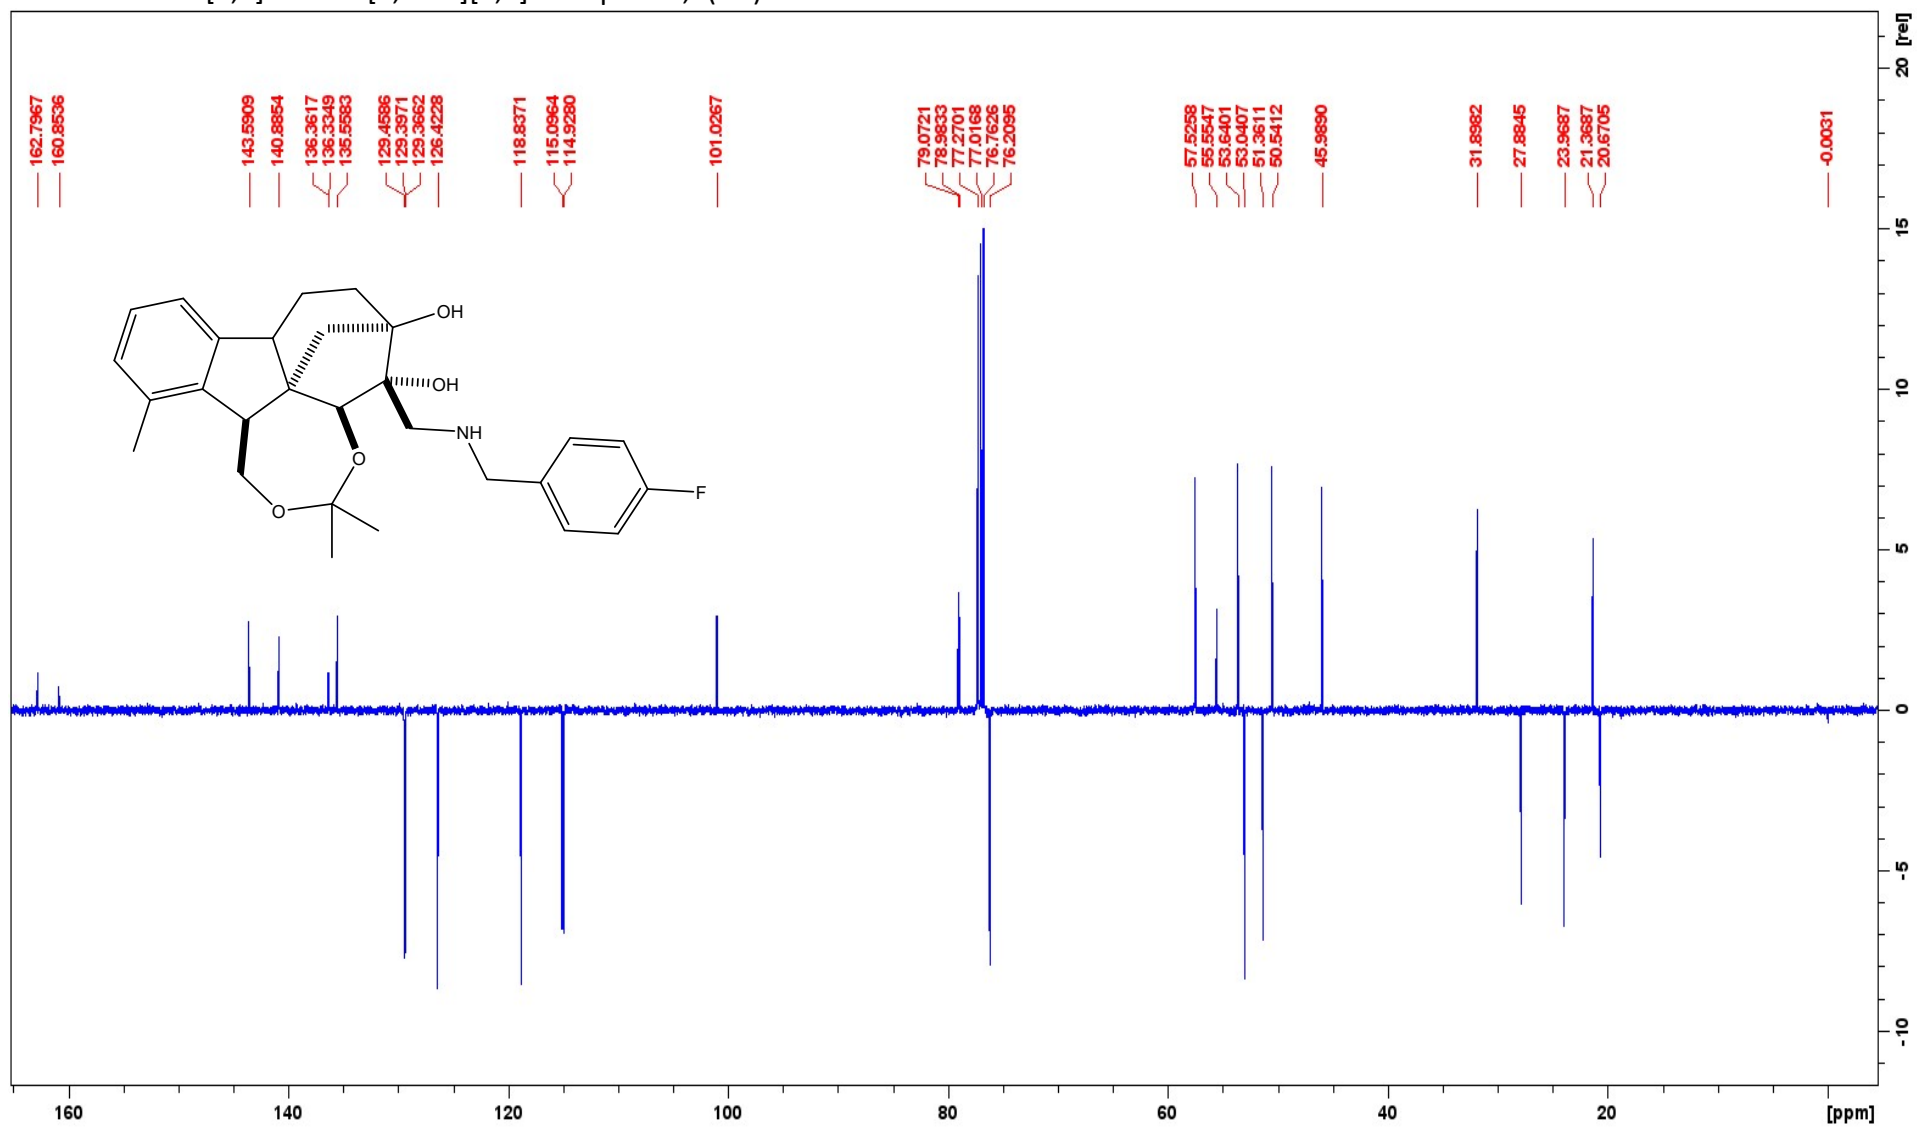

COSY of (4*a*S,4*a*<sup>1</sup>*R*,5*R*,6*S*,12*b**S*)-5-(((4-Fluorobenzyl)amino)methyl)-3,3,12-trimethyl-4*a*,5,7,8,8*a*,12*b*-hexahydro-4*a*<sup>1</sup>,6-methanobenzo[2,3]azuleno[8,1-*de*][1,3]dioxepine-5,6(1*H*)-diol **10**

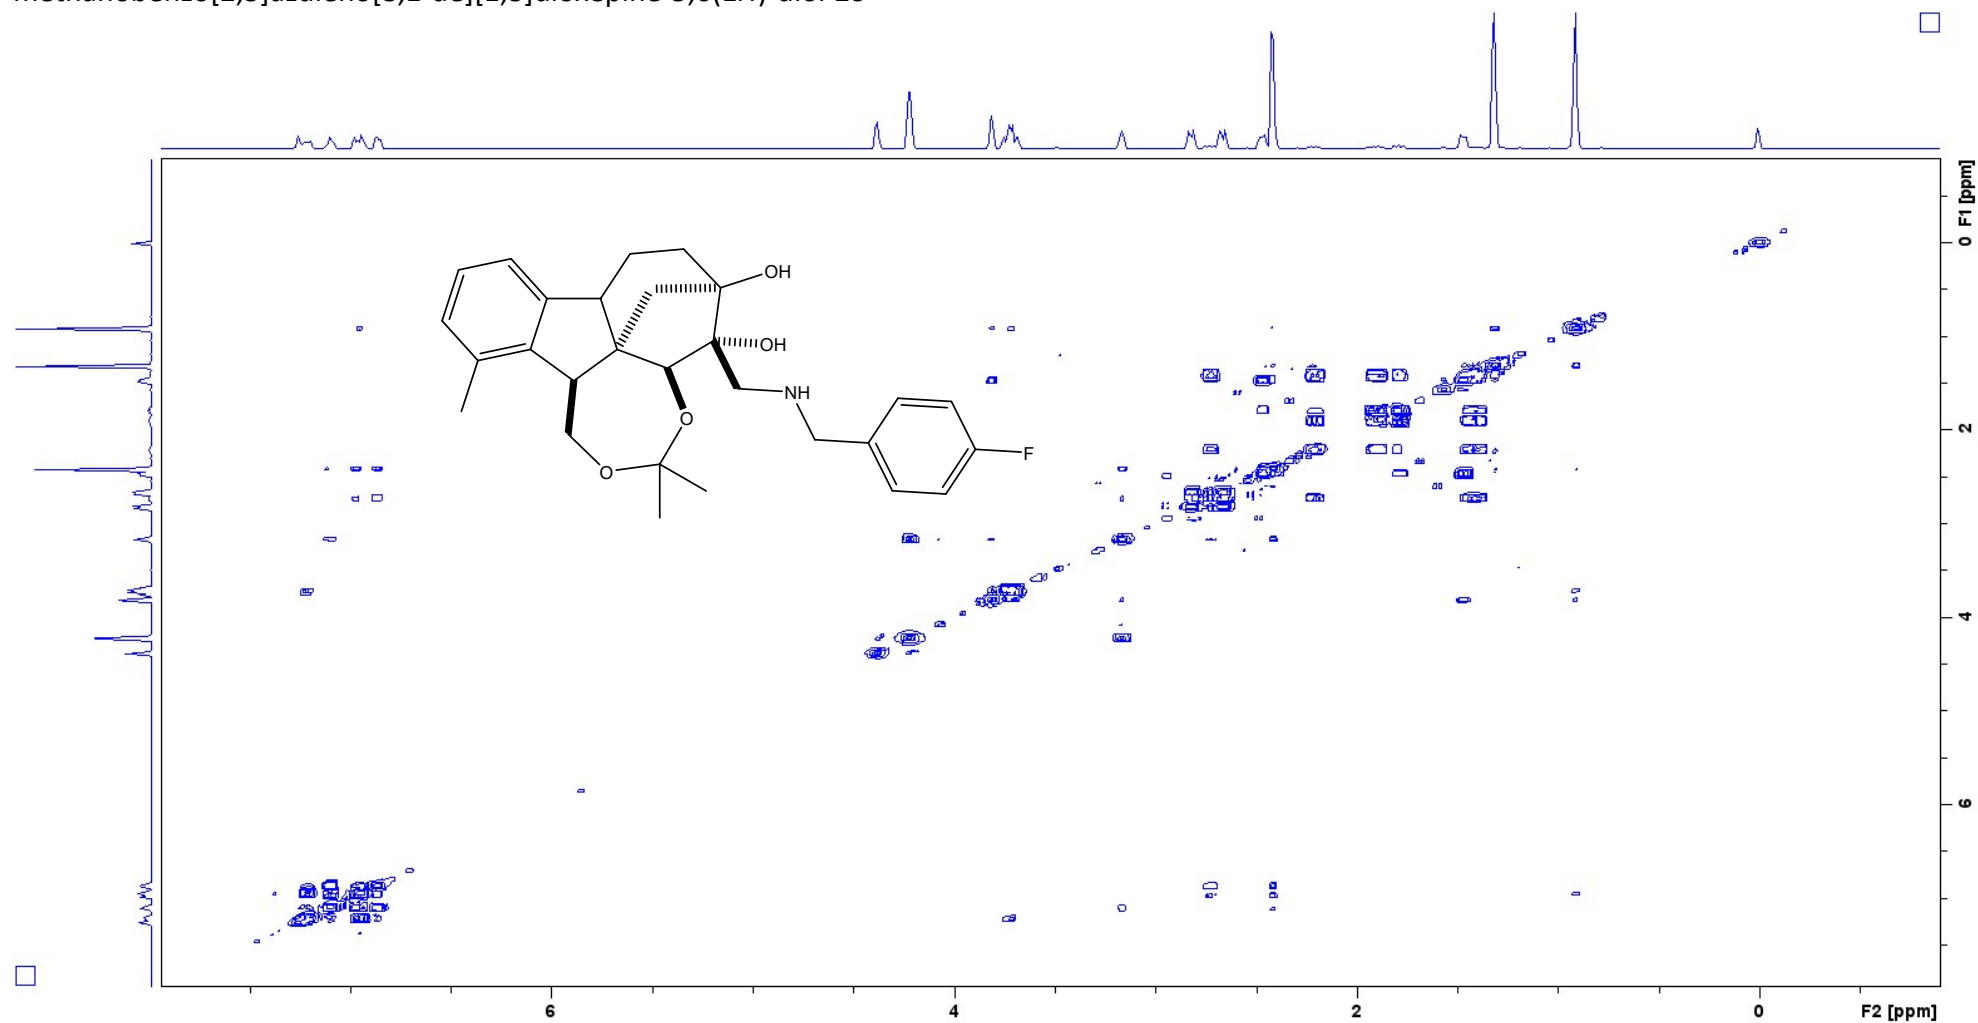

NOESY of (4*a*S,4*a*<sup>1</sup>*R*,5*R*,6*S*,12*b**S*)-5-(((4-Fluorobenzyl)amino)methyl)-3,3,12-trimethyl-4*a*,5,7,8,8*a*,12*b*-hexahydro-4*a*<sup>1</sup>,6-methanobenzo[2,3]azuleno[8,1-*de*][1,3]dioxepine-5,6(1*H*)-diol **10**

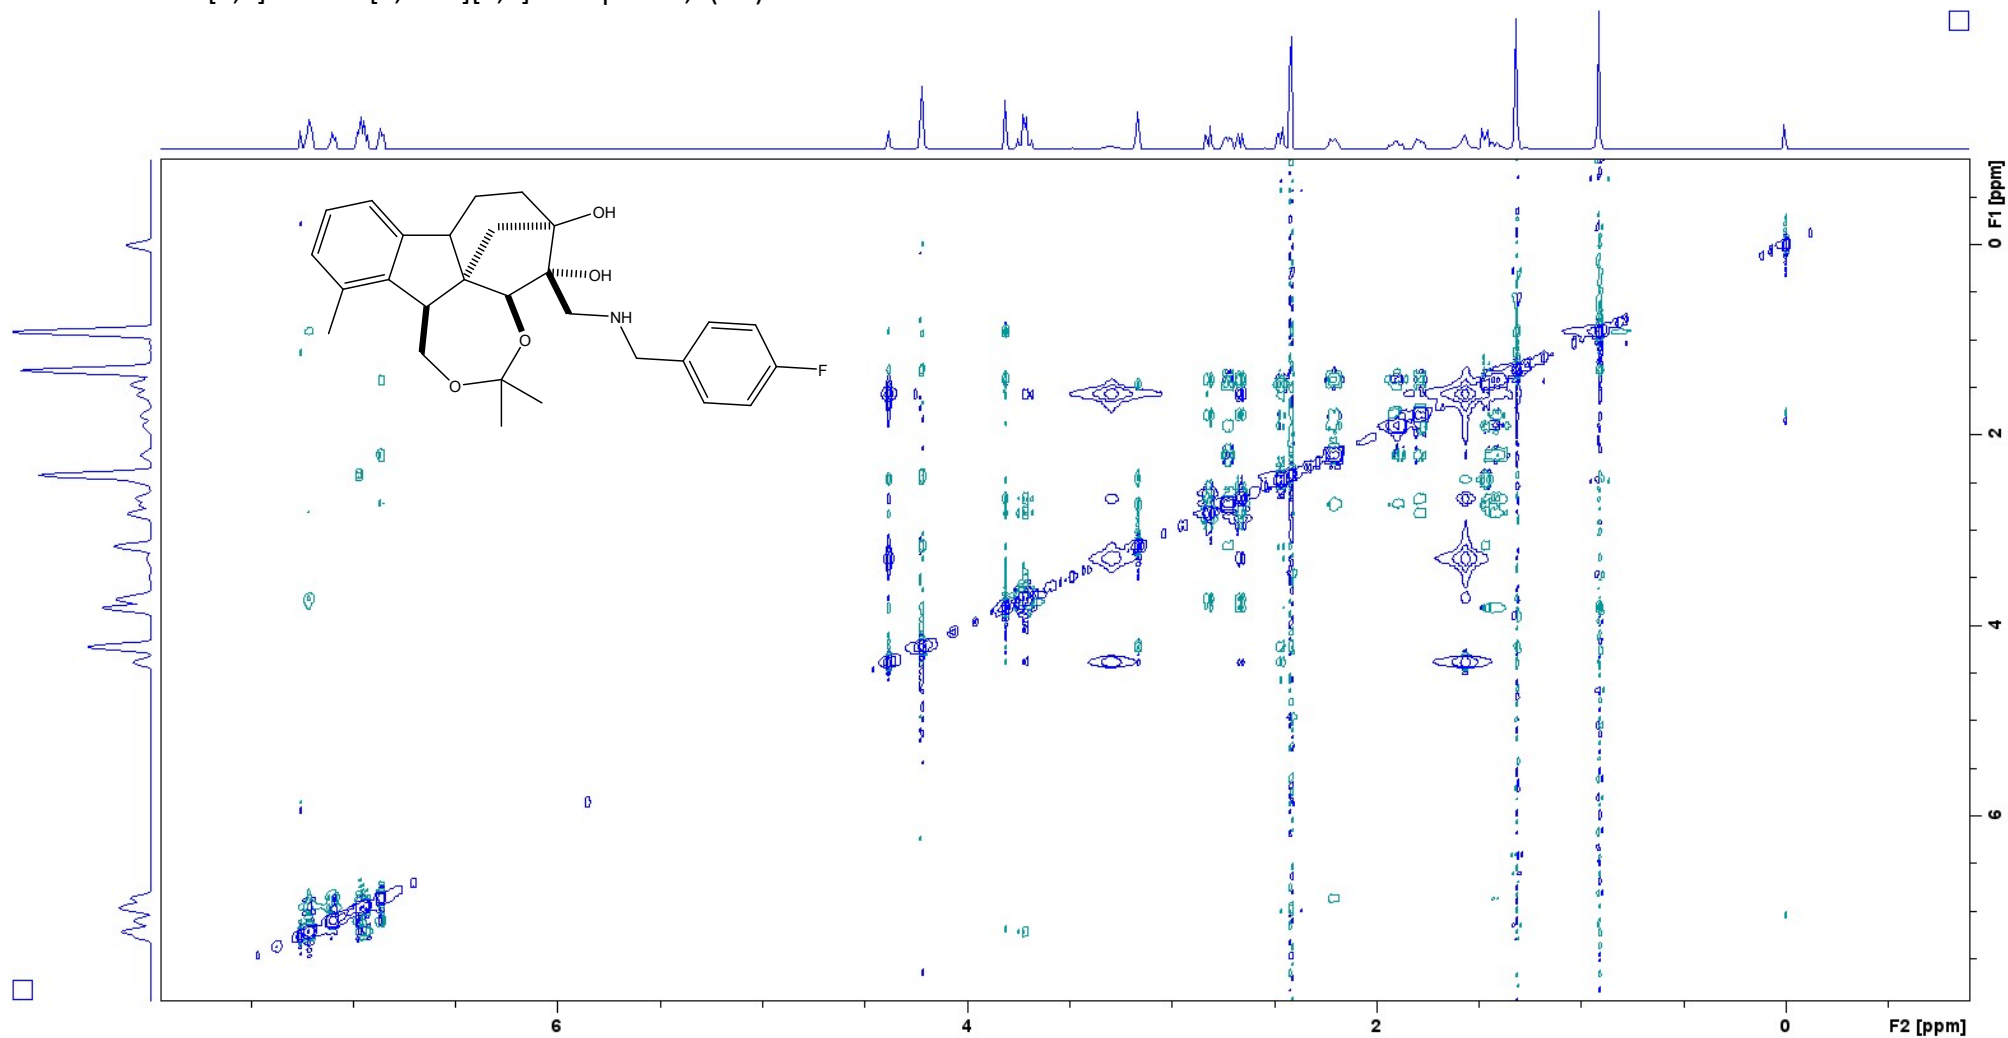



HSQC of (4*S*,4*a*<sup>1</sup>*R*,5*R*,6*S*,12*bS*)-5-(((4-Fluorobenzyl)amino)methyl)-3,3,12-trimethyl-4*a*,5,7,8,8*a*,12*b*-hexahydro-4*a*<sup>1</sup>,6-methanobenzo[2,3]azuleno[8,1-*de*][1,3]dioxepine-5,6(1*H*)-diol **10**

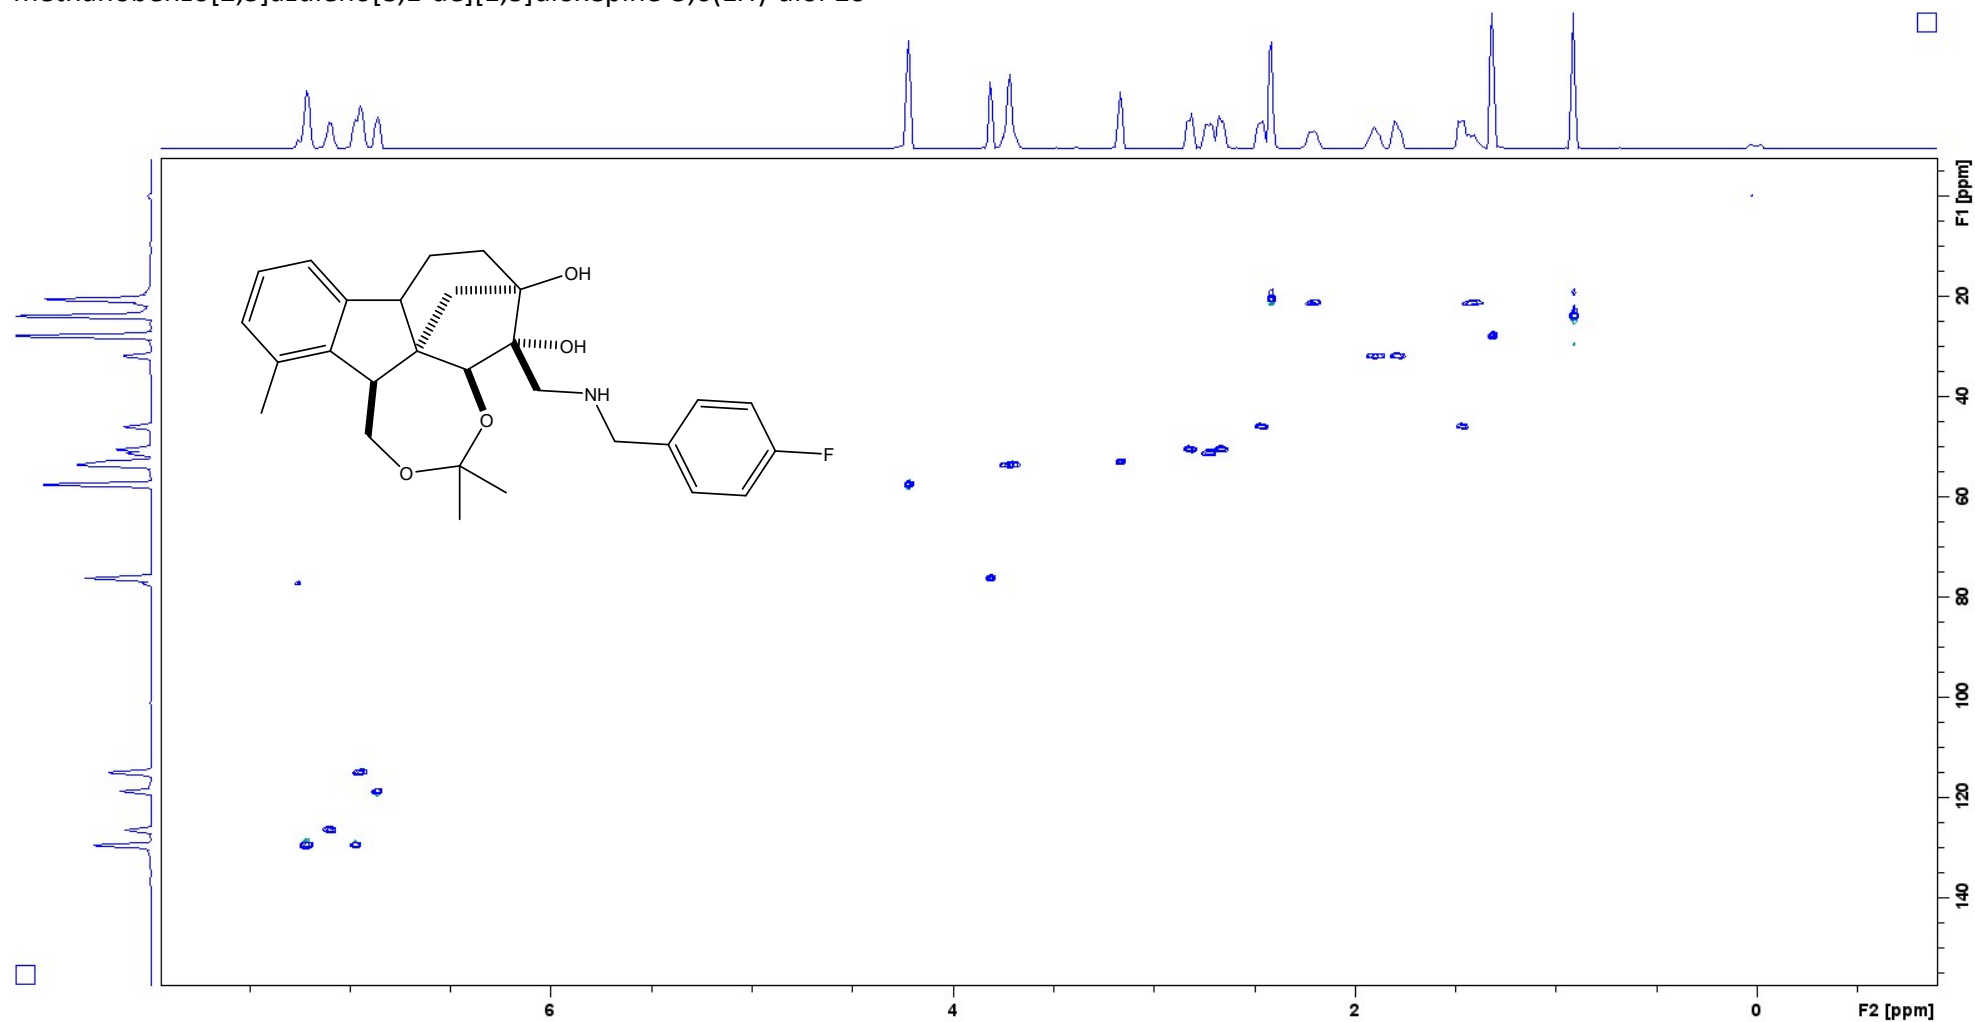

HMBC of (4*a**S*,4*a*<sup>1</sup>*R*,5*R*,6*S*,12*b**S*)-5-(((4-Fluorobenzyl)amino)methyl)-3,3,12-trimethyl-4*a*,5,7,8,8*a*,12*b*-hexahydro-4*a*<sup>1</sup>,6-methanobenzo[2,3]azuleno[8,1-*de*][1,3]dioxepine-5,6(1*H*)-diol **10**

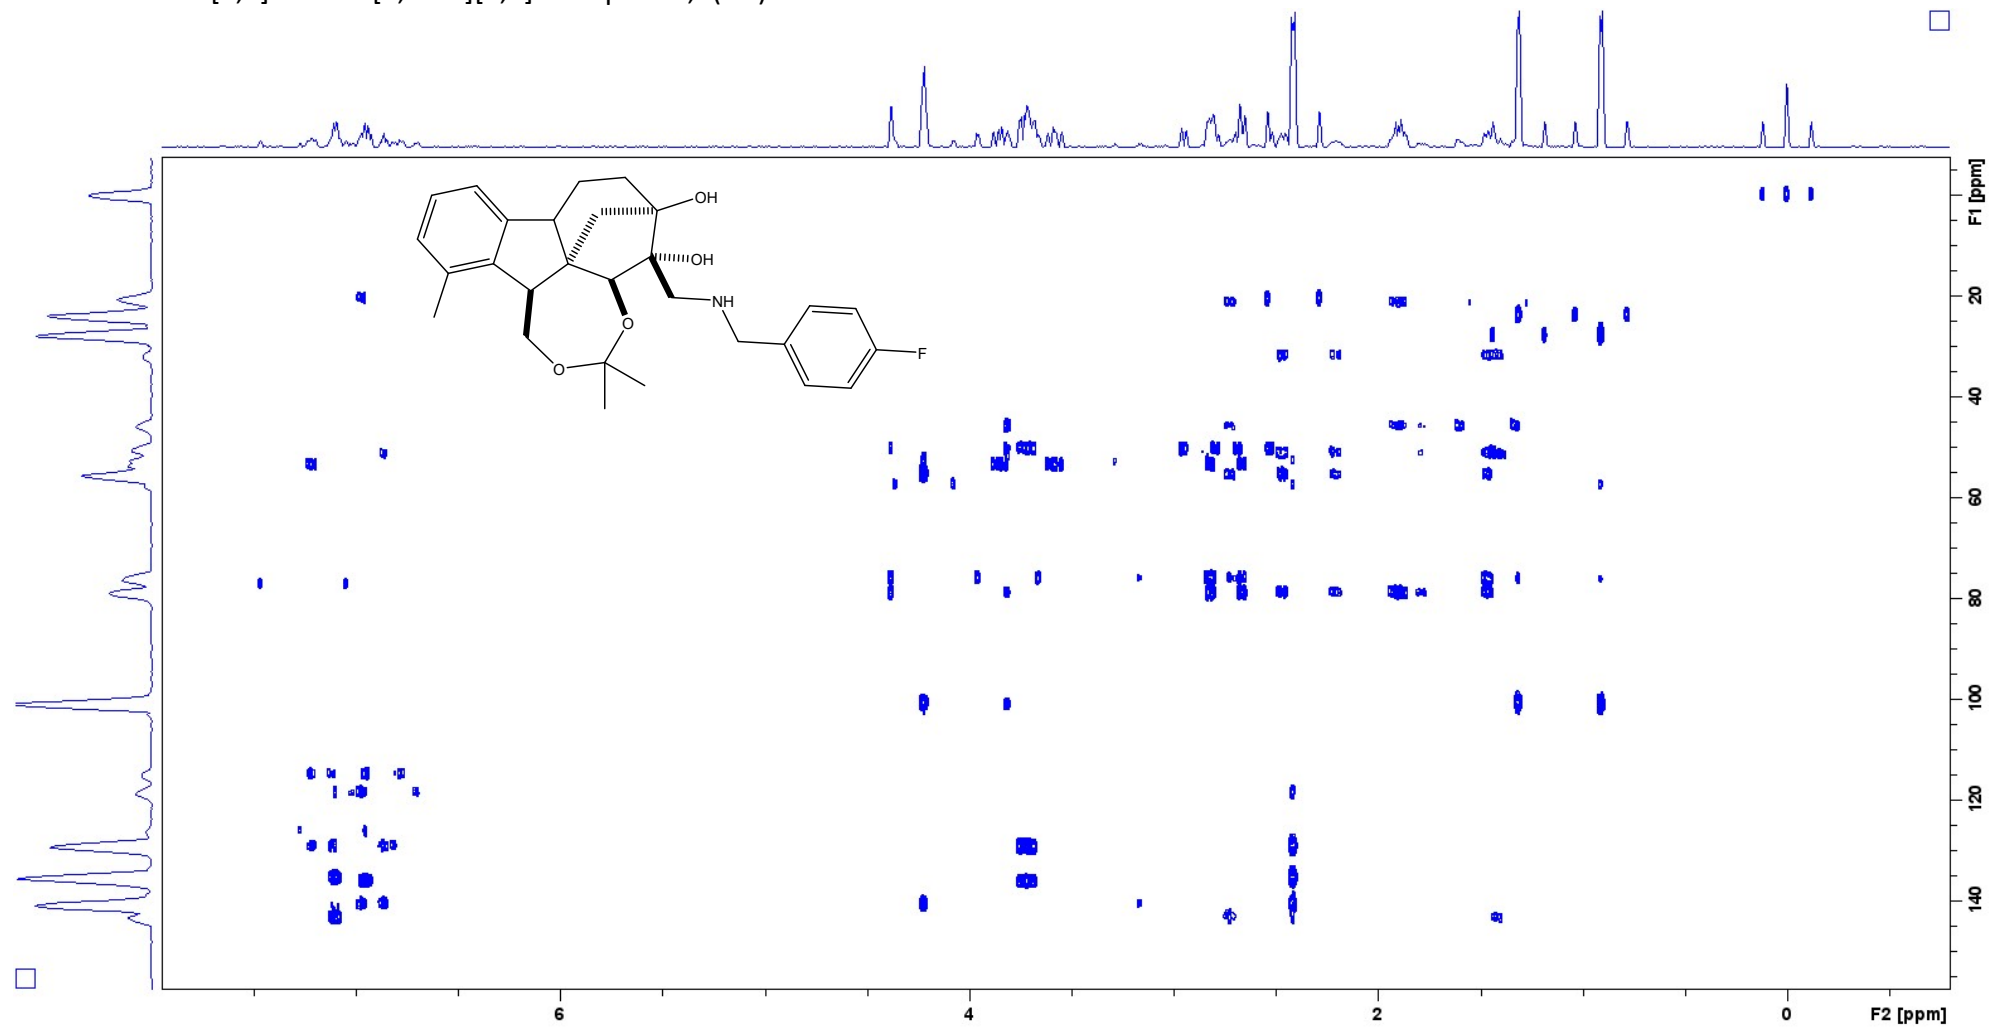

$^{19}\text{F}$  *J*-MOD NMR (470 MHz) of (4*a**S*,4*a*<sup>1</sup>*R*,5*R*,6*S*,12*b**S*)-5-(((4-Fluorobenzyl)amino)methyl)-3,3,12-trimethyl-4*a*,5,7,8,8*a*,12*b*-hexahydro-4*a*<sup>1</sup>,6-methanobenzo[2,3]azuleno[8,1-*de*][1,3]dioxepine-5,6(1*H*)-diol **10**

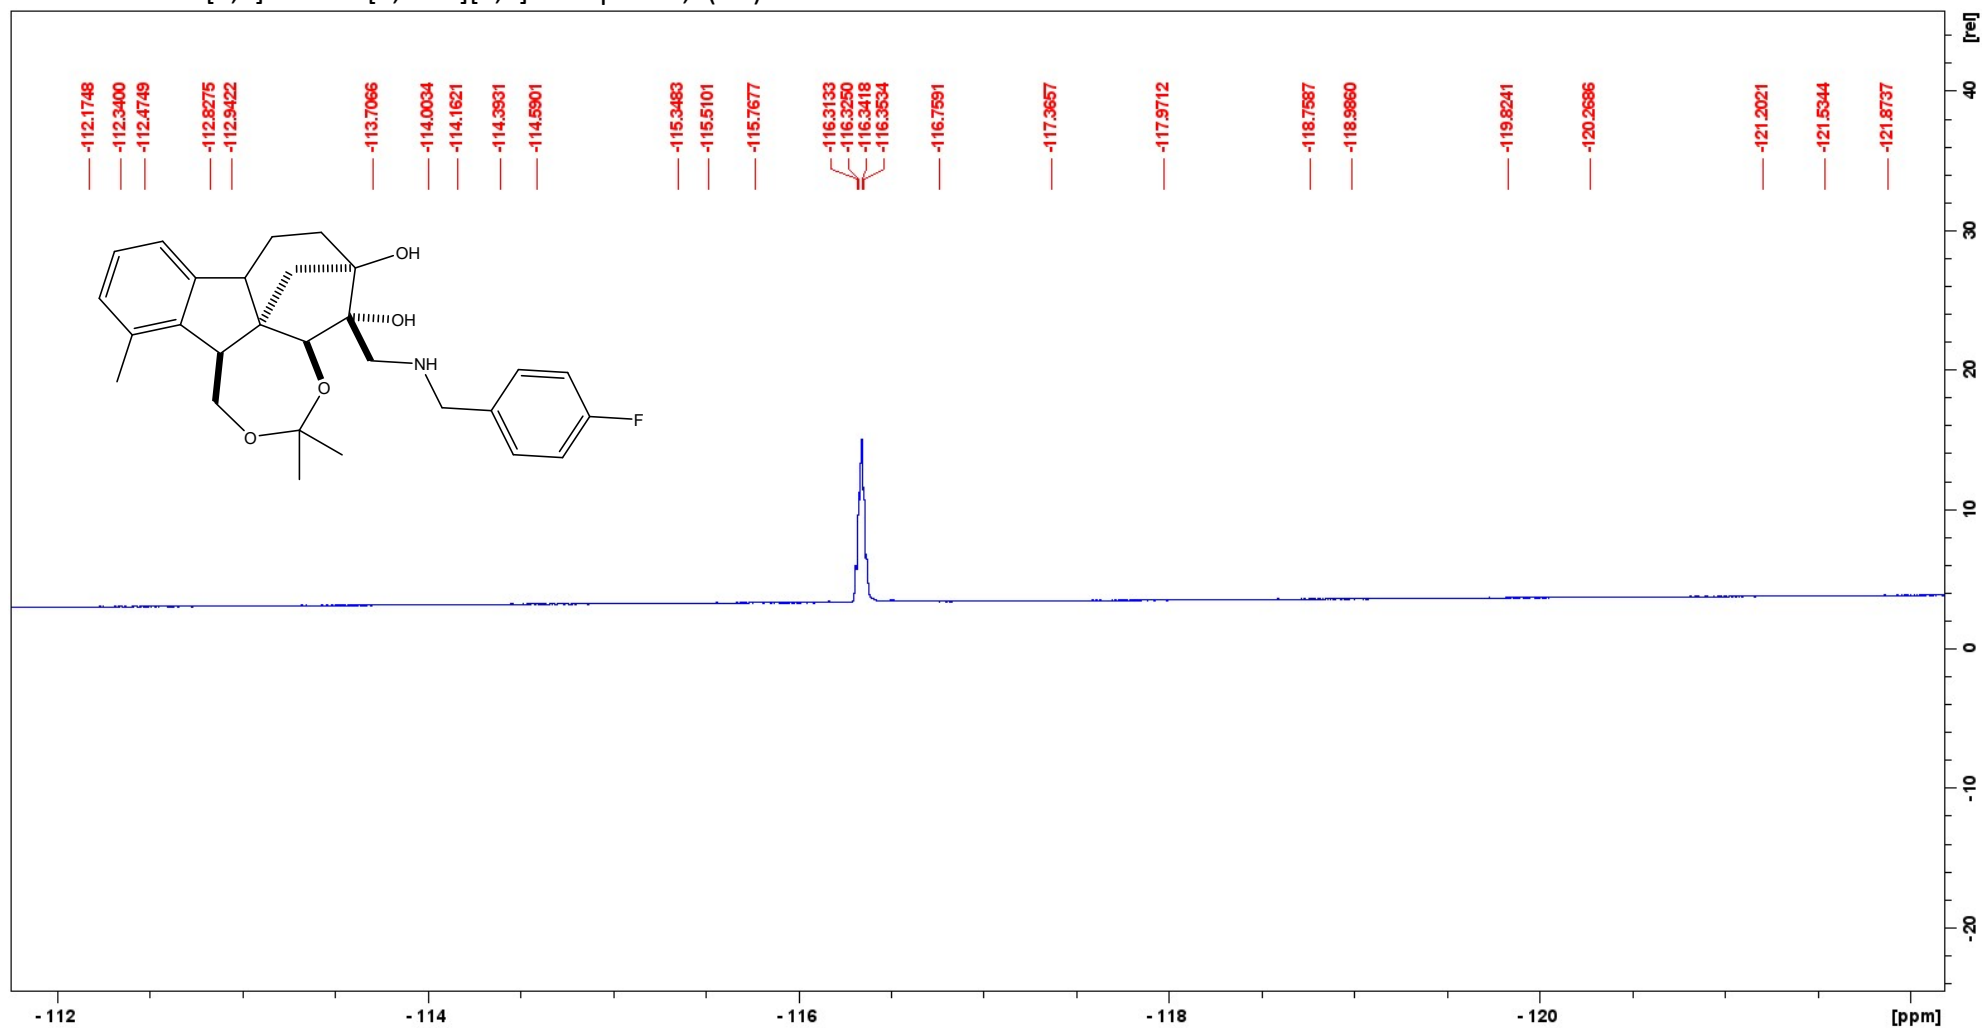

$^1\text{H-NMR}$  (500 MHz) of (4*a*S,4*a*<sup>1</sup>*R*,5*R*,6*S*,12*b**S*)-5-(((4-Methoxybenzyl)amino)methyl)-3,3,12-trimethyl-4*a*,5,7,8,8*a*,12*b*-hexahydro-4*a*<sup>1</sup>,6-methanobenzo[2,3]azuleno[8,1-*de*][1,3]dioxepine-5,6(1*H*)-diol **11**

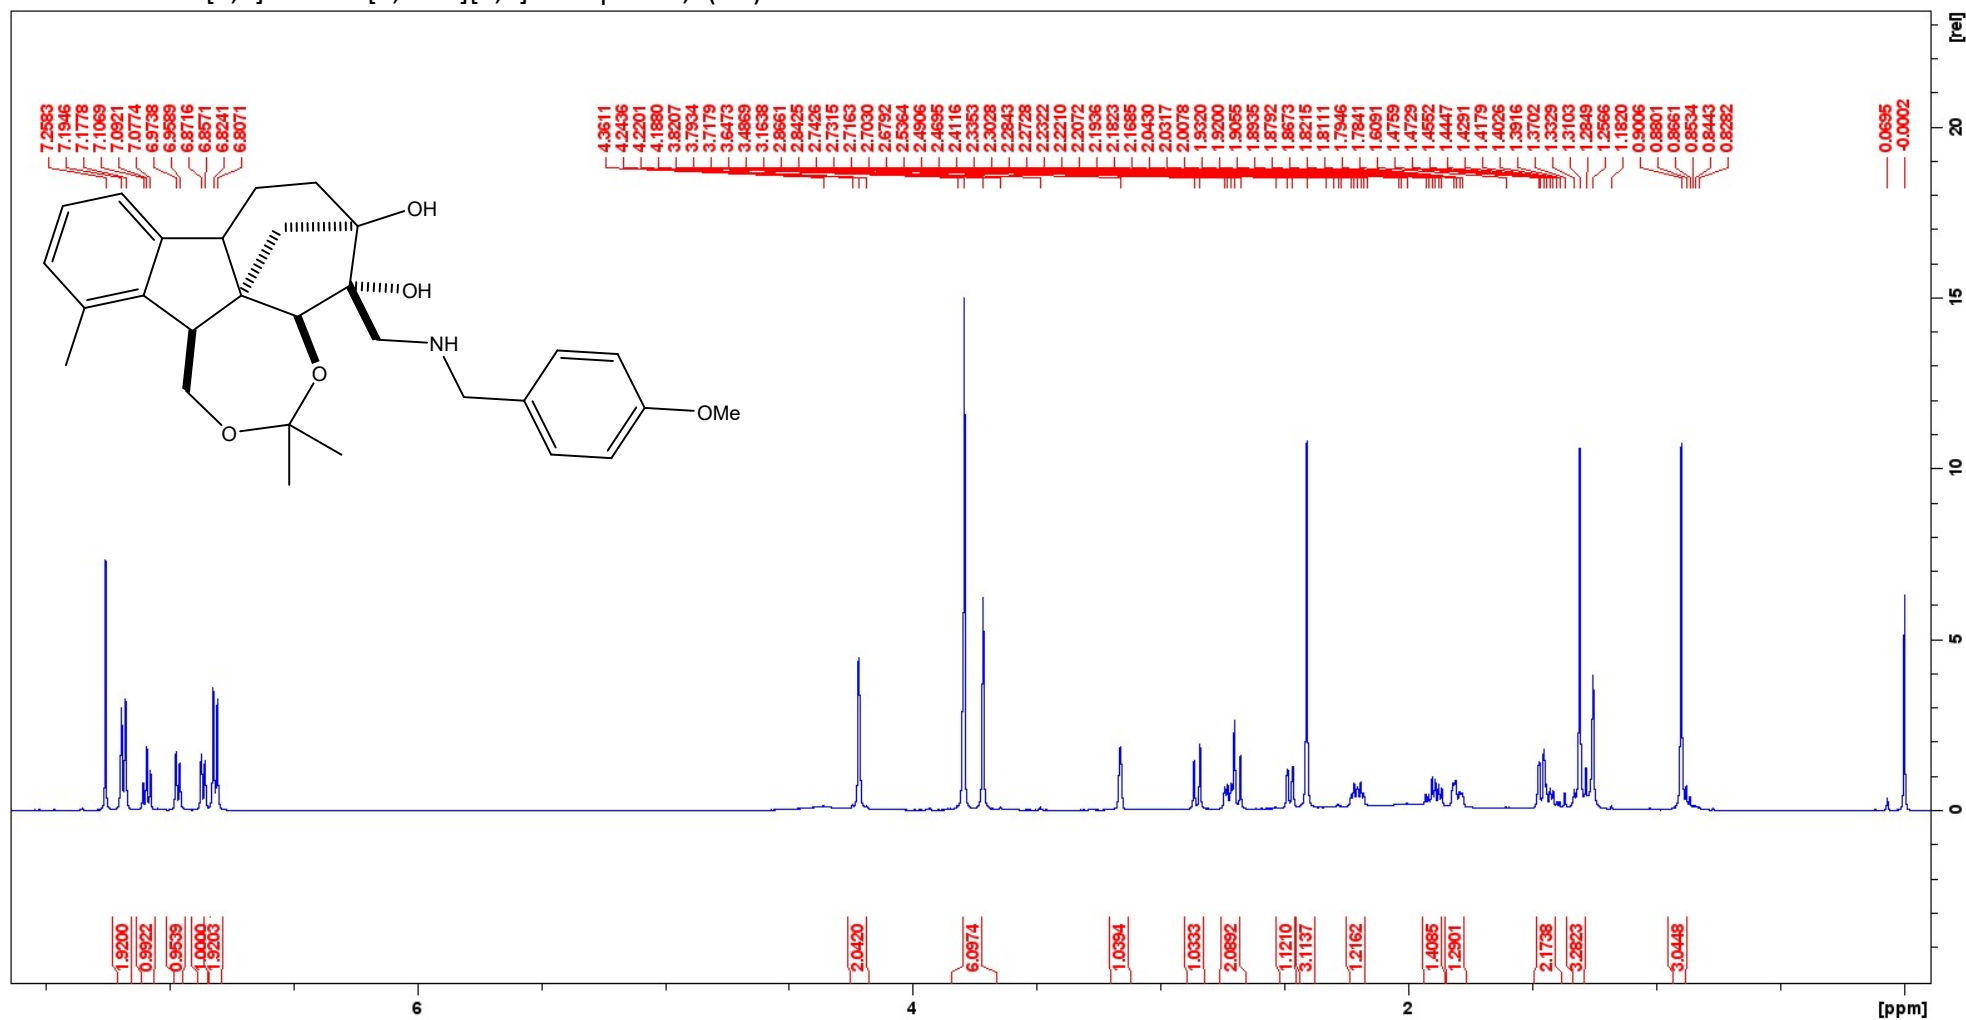

$^{13}\text{C}\{^1\text{H}\}$  J-MOD NMR (125 MHz) of (4*a*S,4*a*<sup>1</sup>*R*,5*R*,6*S*,12*b**S*)-5-(((4-Methoxybenzyl)amino)methyl)-3,3,12-trimethyl-4*a*,5,7,8,8*a*,12*b*-hexahydro-4*a*<sup>1</sup>,6-methanobenzo[2,3]azuleno[8,1-*de*][1,3]dioxepine-5,6(1*H*)-diol **11**

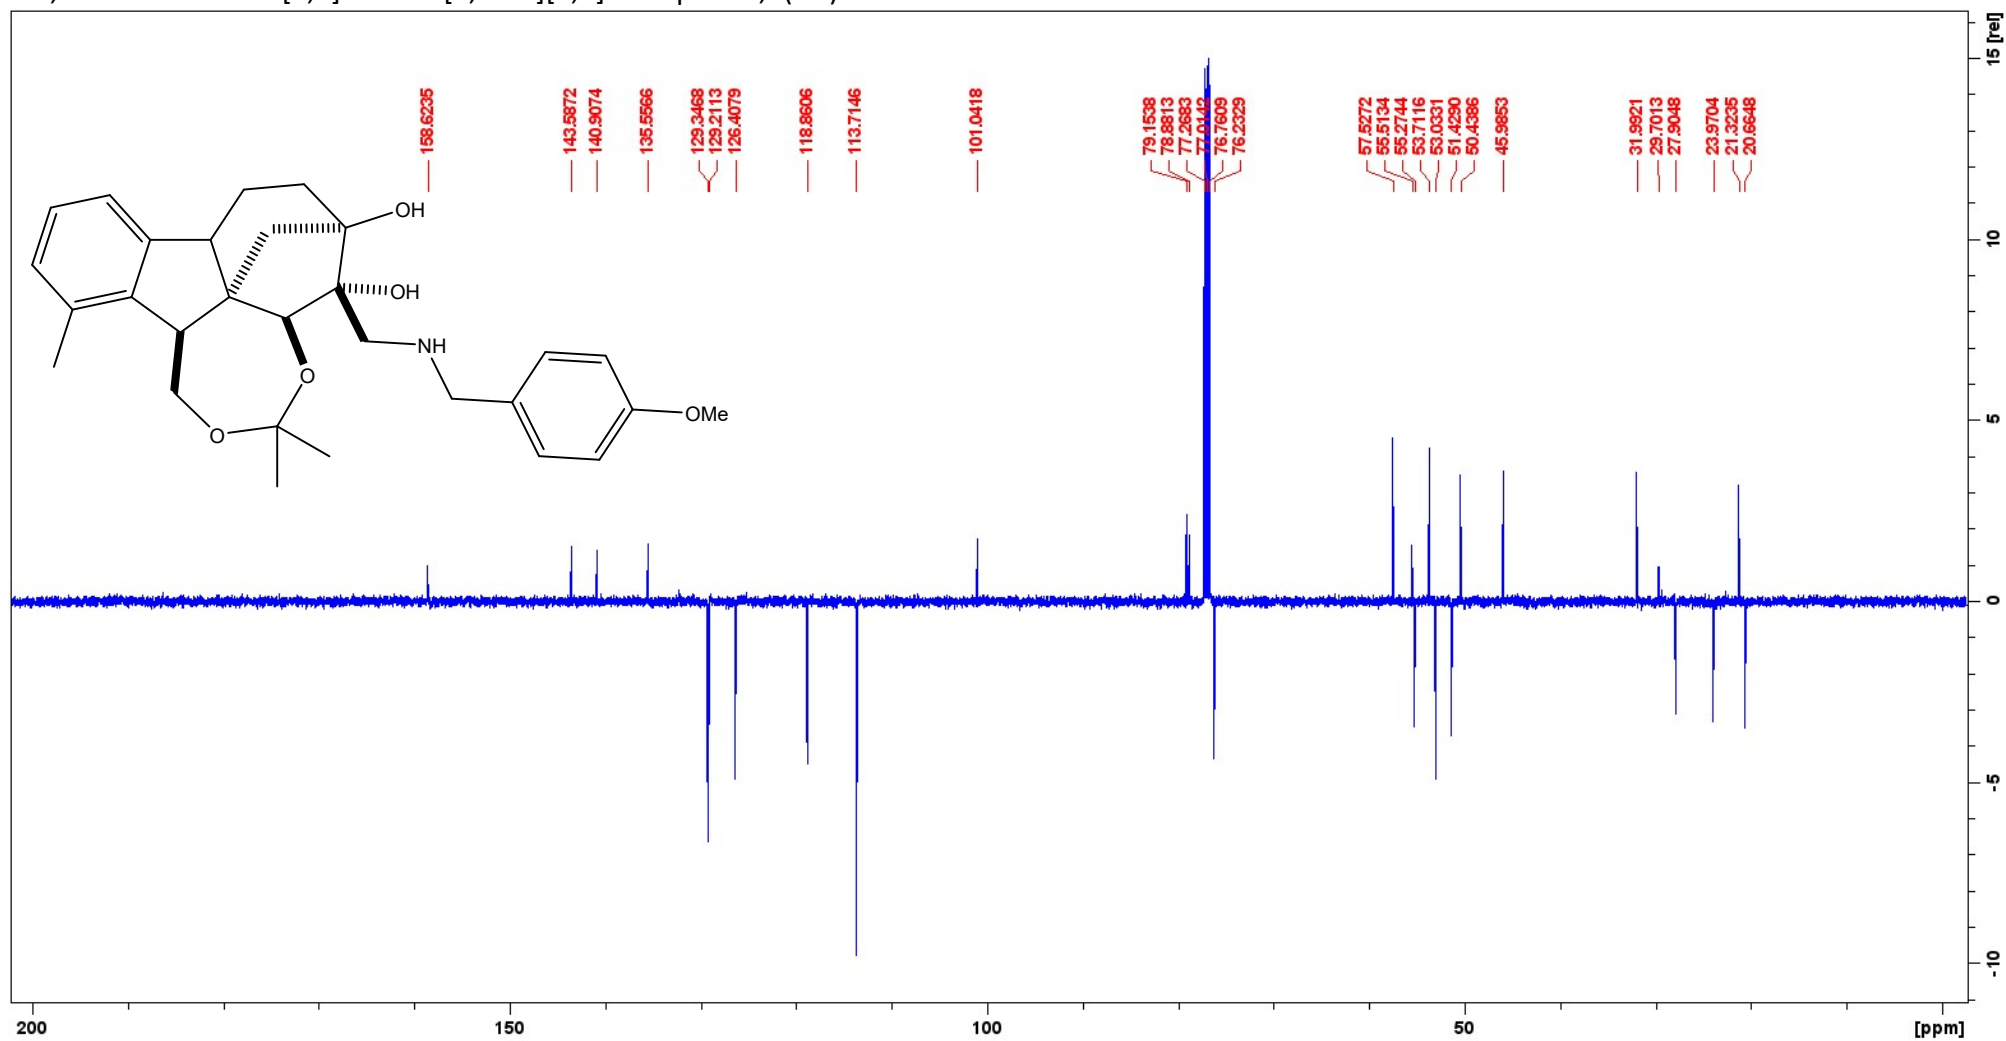

COSY of (4a*S*,4a<sup>1</sup>*R*,5*R*,6*S*,12*bS*)-5-(((4-Methoxybenzyl)amino)methyl)-3,3,12-trimethyl-4a,5,7,8,8a,12*b*-hexahydro-4a<sup>1</sup>,6-methanobenzo[2,3]azuleno[8,1-*de*][1,3]dioxepine-5,6(1*H*)-diol **11**

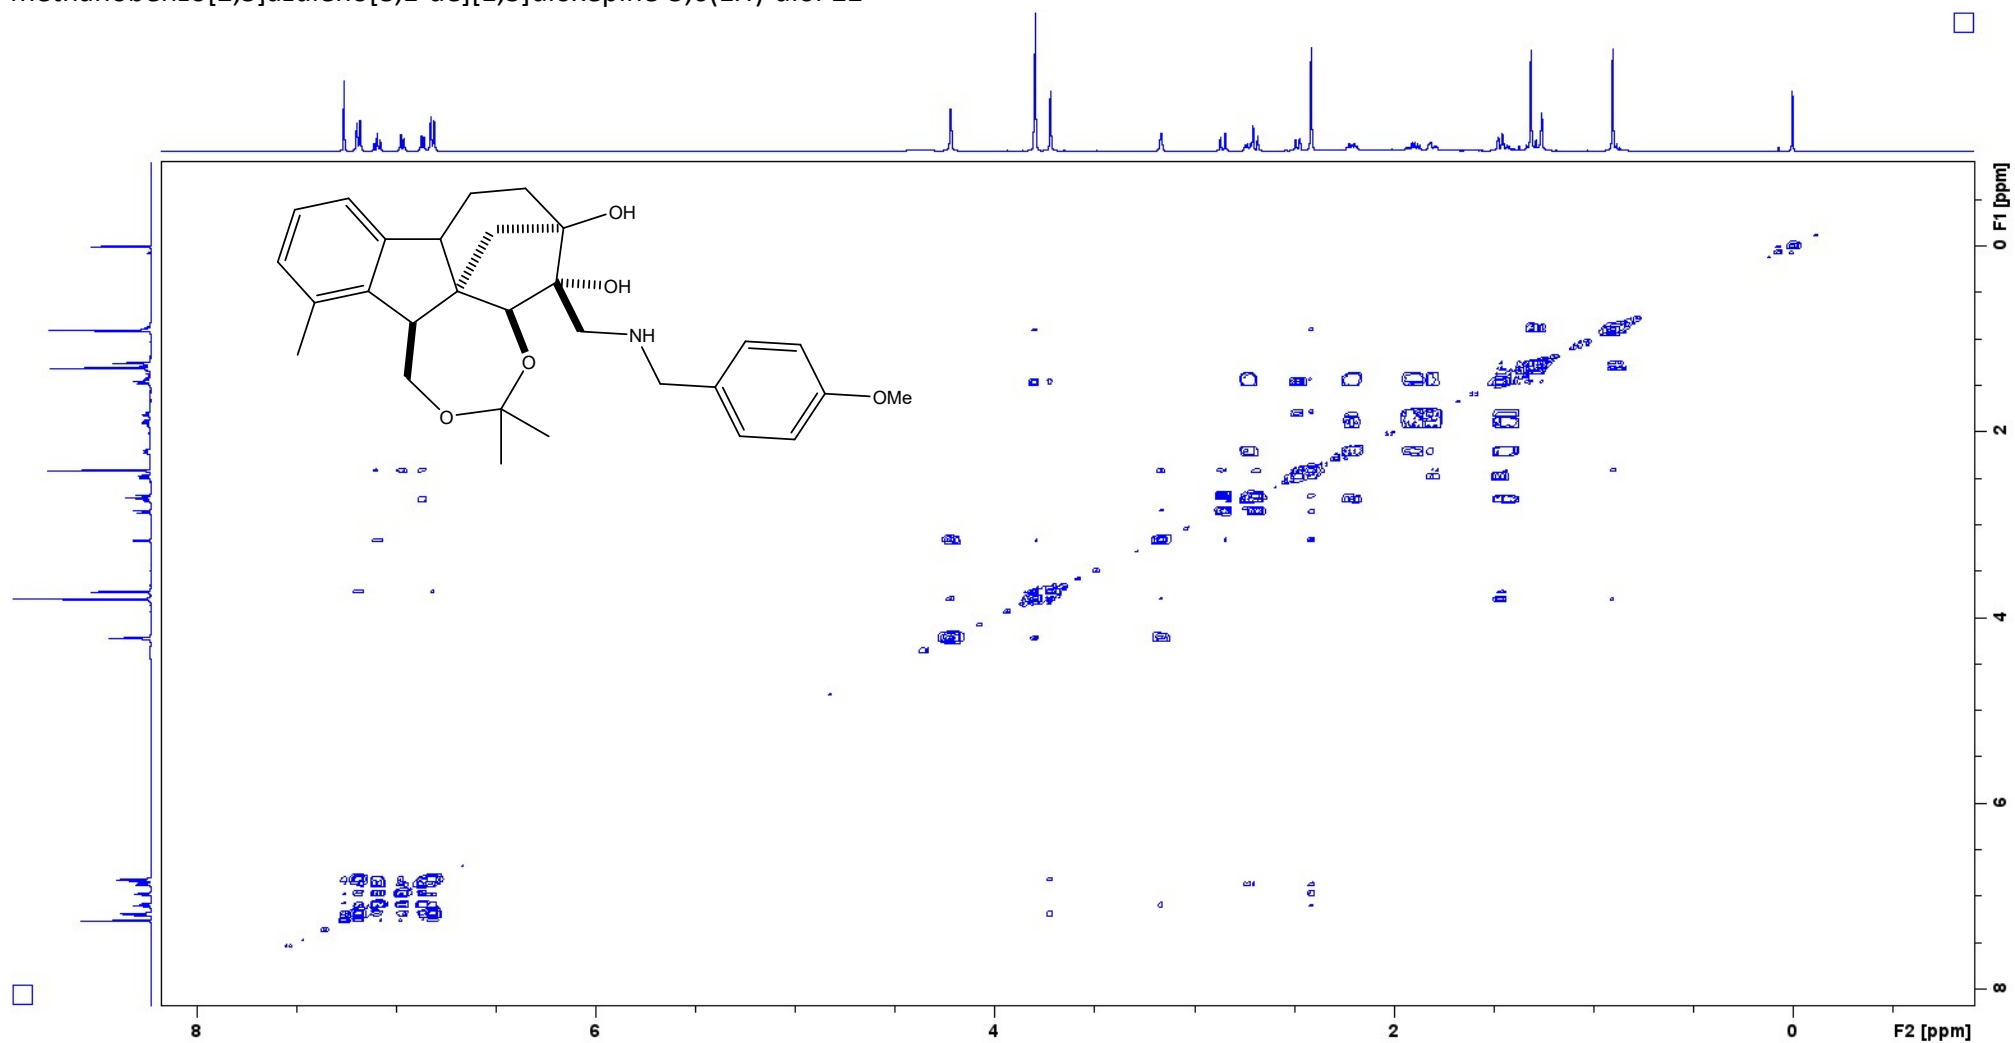

NOESY of (4a*S*,4a<sup>1</sup>*R*,5*R*,6*S*,12*bS*)-5-(((4-Methoxybenzyl)amino)methyl)-3,3,12-trimethyl-4a,5,7,8,8a,12*b*-hexahydro-4a<sup>1</sup>,6-methanobenzo[2,3]azuleno[8,1-*de*][1,3]dioxepine-5,6(1*H*)-diol **11**

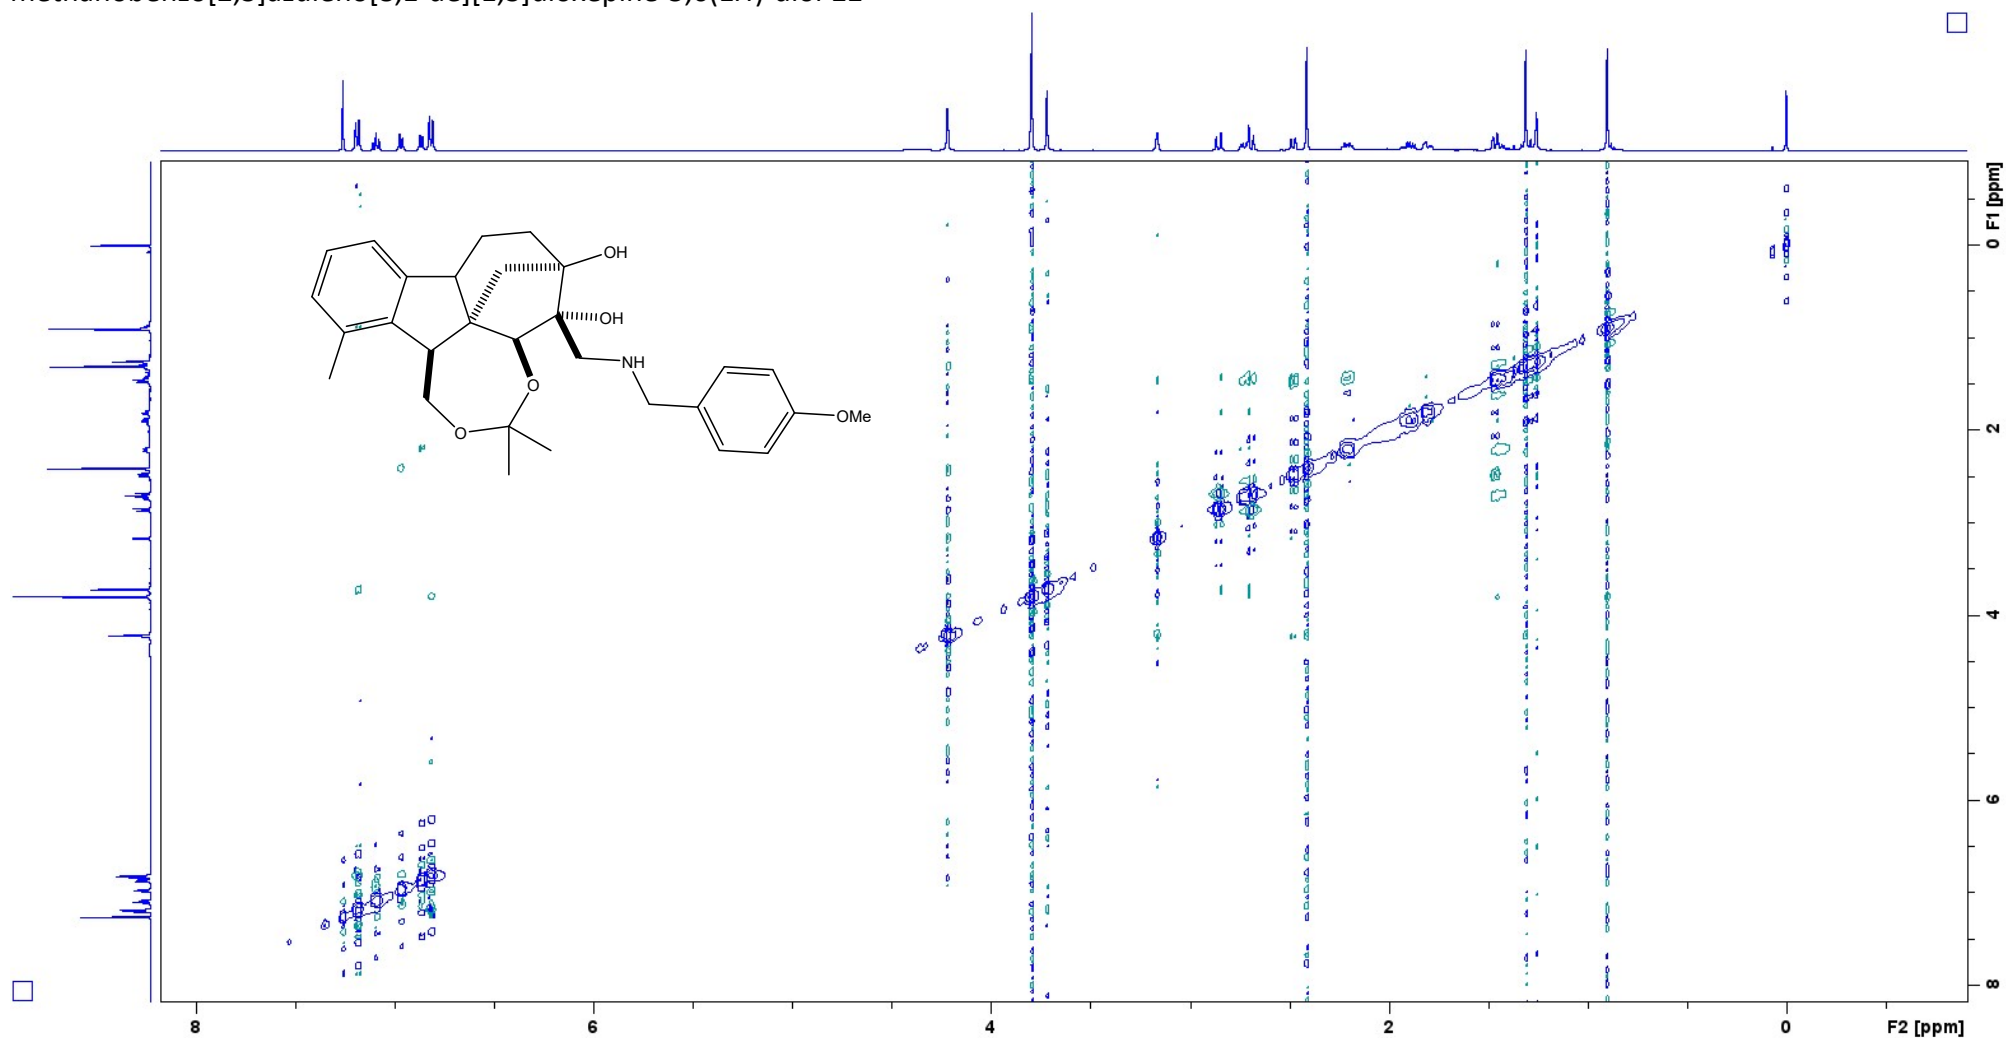

HSQC of (4*a*S,4*a*<sup>1</sup>*R*,5*R*,6*S*,12*b**S*)-5-(((4-Methoxybenzyl)amino)methyl)-3,3,12-trimethyl-4*a*,5,7,8,8*a*,12*b*-hexahydro-4*a*<sup>1</sup>,6-methanobenzo[2,3]azuleno[8,1-*de*][1,3]dioxepine-5,6(1*H*)-diol **11**

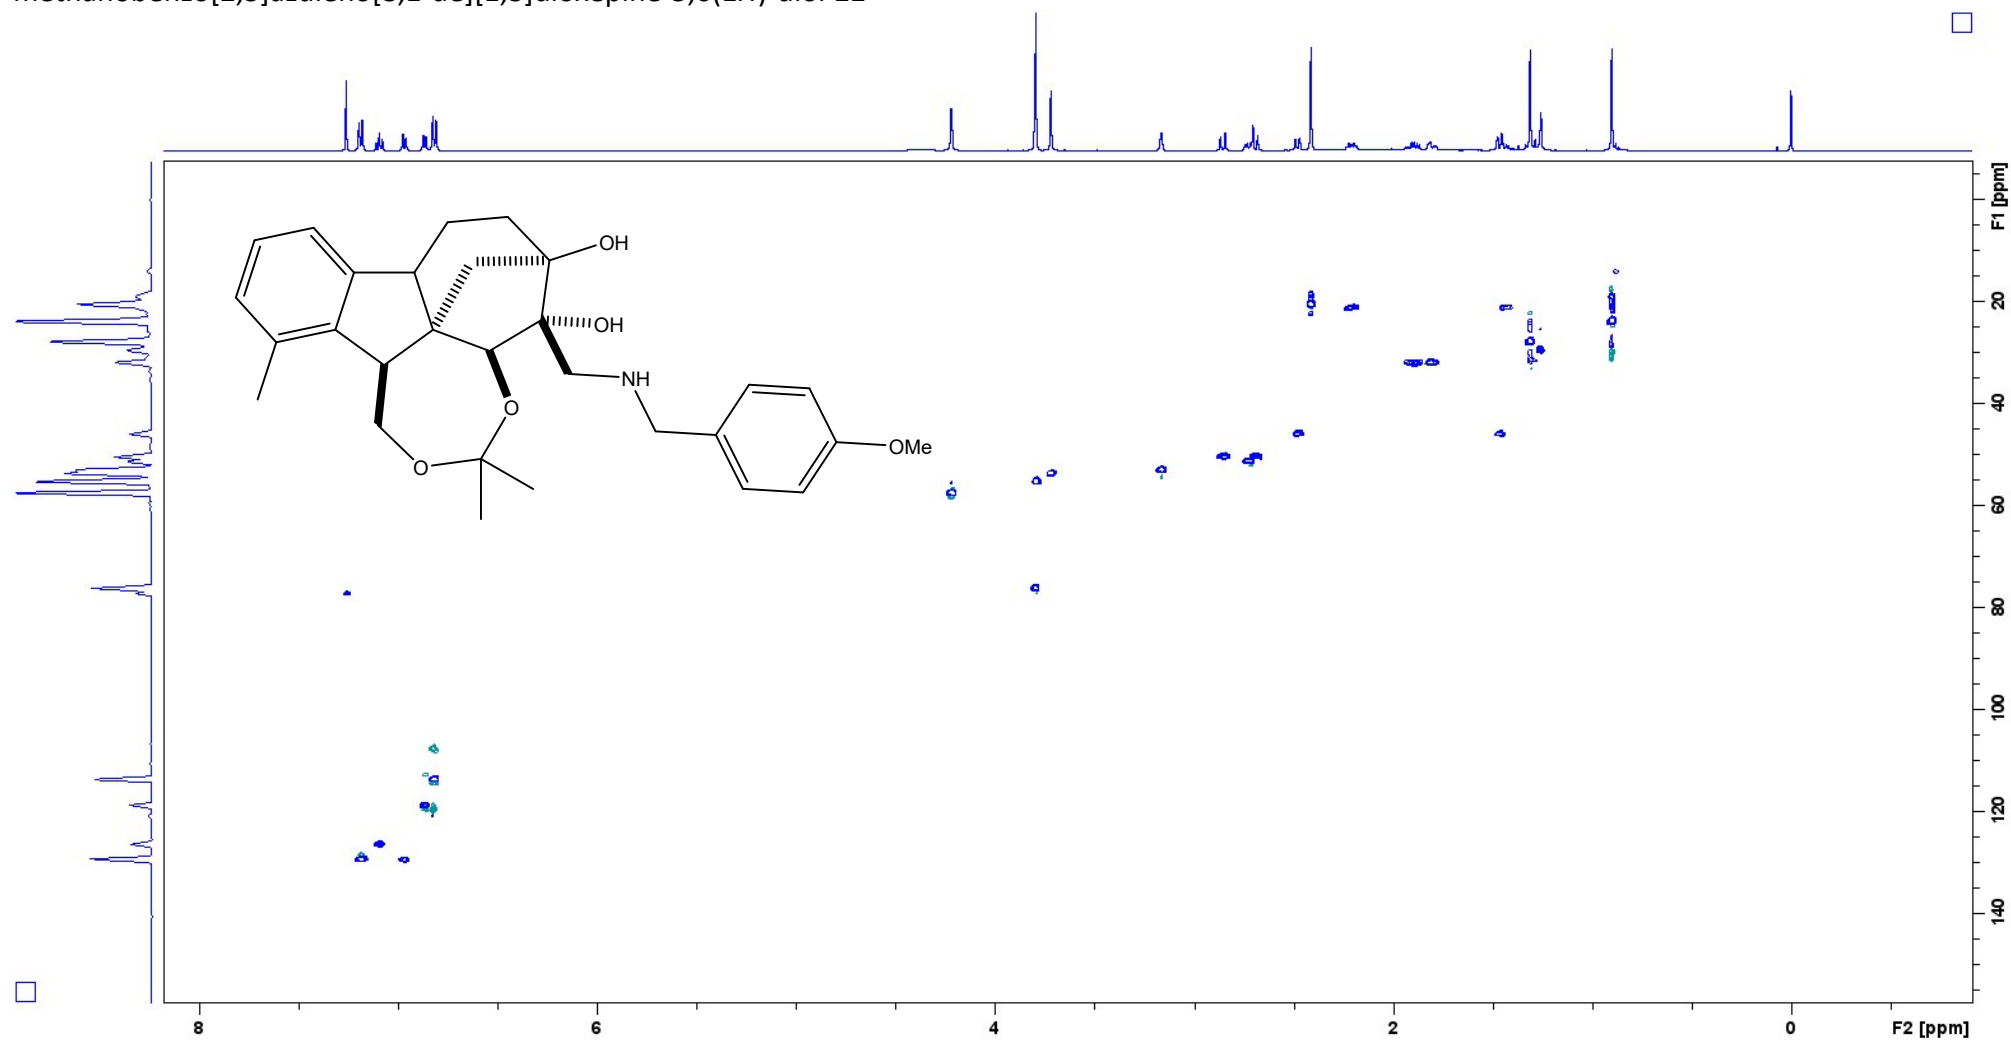



HMBC of (4*S*,4*a*<sup>1</sup>*R*,5*R*,6*S*,12*bS*)-5-(((4-Methoxybenzyl)amino)methyl)-3,3,12-trimethyl-4*a*,5,7,8,8*a*,12*b*-hexahydro-4*a*<sup>1</sup>,6-methanobenzo[2,3]azuleno[8,1-*de*][1,3]dioxepine-5,6(1*H*)-diol **11**

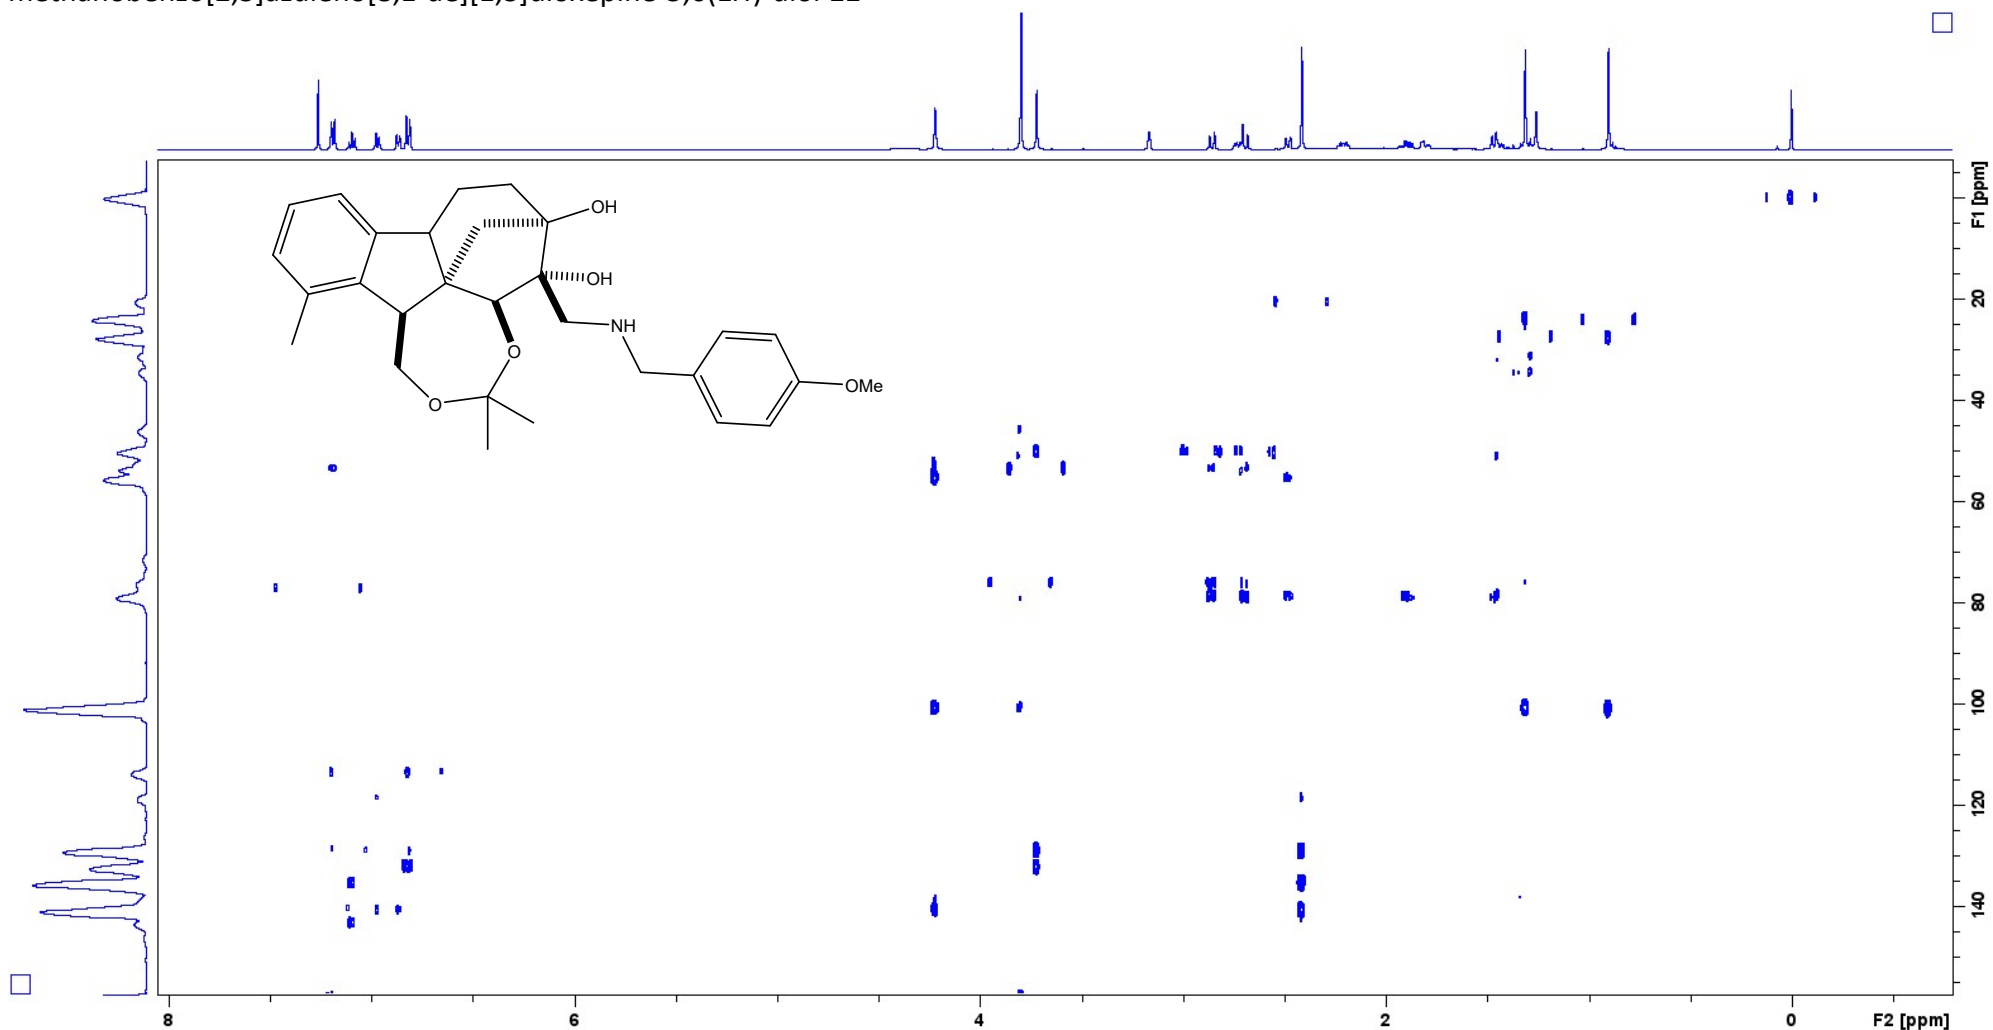

$^1\text{H-NMR}$  (500 MHz) of (4a*S*,4a<sup>1</sup>*R*,5*R*,6*S*,12*bS*)-3,3,12-Trimethyl-5-(((naphthalen-1-ylmethyl)amino)methyl)-4a,5,7,8,8a,12*b*-hexahydro-4a<sup>1</sup>,6-methanobenzo[2,3]azuleno[8,1-*de*][1,3]dioxepine-5,6(1*H*)-diol **12**

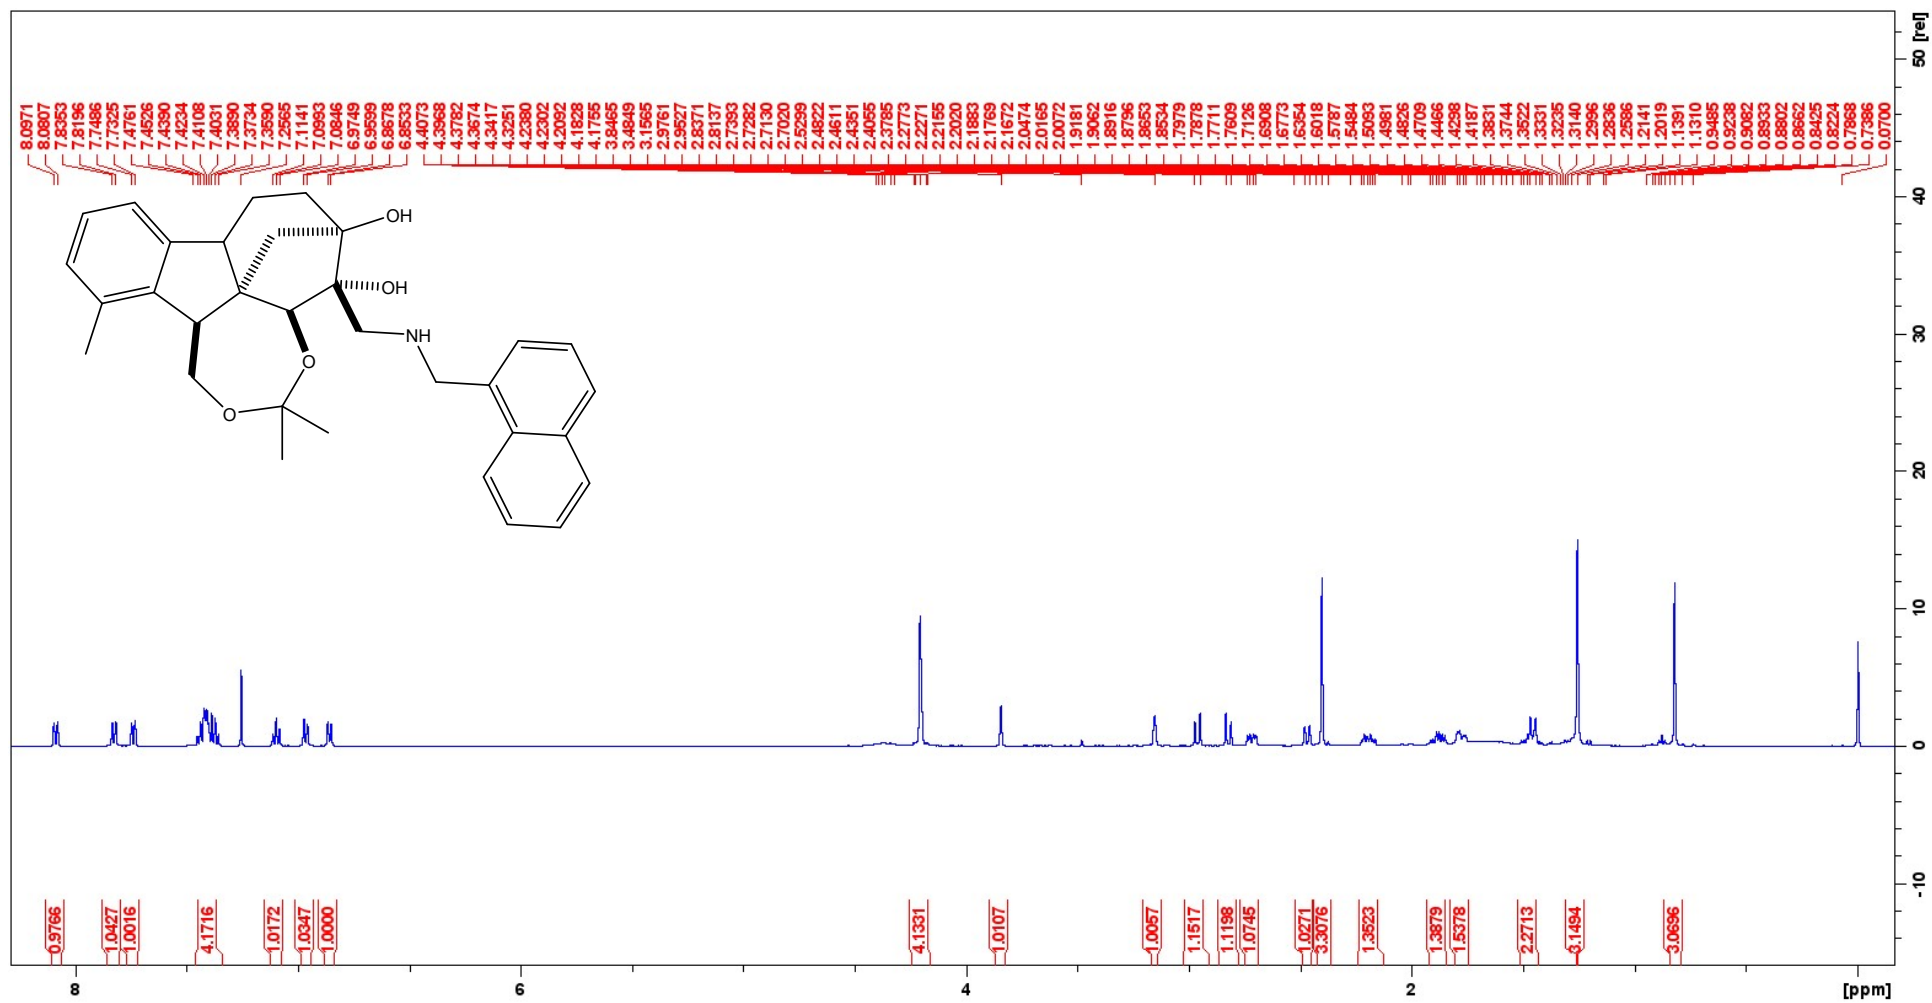

$^{13}\text{C}\{^1\text{H}\}$  J-MOD NMR (125 MHz) of (4a*S*,4a<sup>1</sup>*R*,5*R*,6*S*,12*bS*)-3,3,12-Trimethyl-5-(((naphthalen-1-ylmethyl)amino)methyl)-4a,5,7,8,8a,12b-hexahydro-4a<sup>1</sup>,6-methanobenzo[2,3]azuleno[8,1-de][1,3]dioxepine-5,6(1*H*)-diol **12**

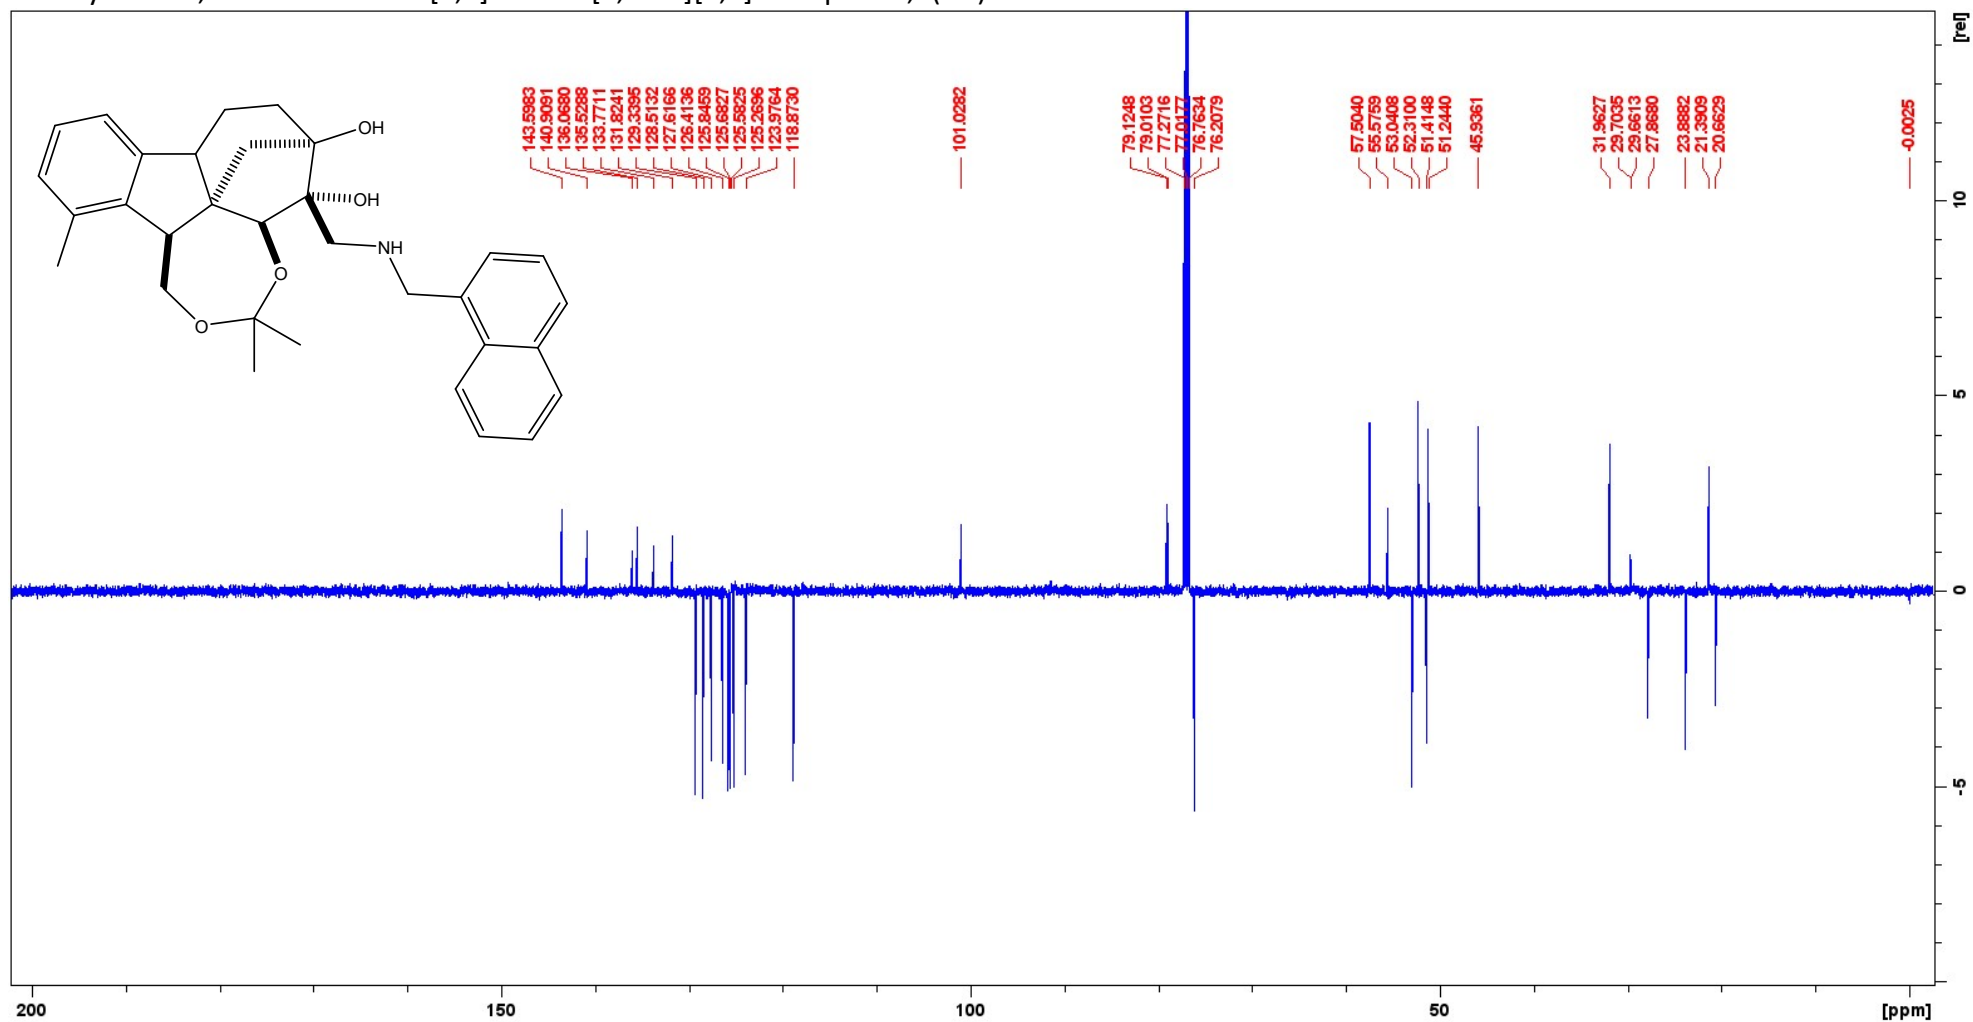

COSY of (4*a*S,4*a*<sup>1</sup>*R*,5*R*,6*S*,12*b**S*)-3,3,12-Trimethyl-5-(((naphthalen-1-ylmethyl)amino)methyl)-4*a*,5,7,8,8*a*,12*b*-hexahydro-4*a*<sup>1</sup>,6-methanobenzo[2,3]azuleno[8,1-*de*][1,3]dioxepine-5,6(1*H*)-diol **12**

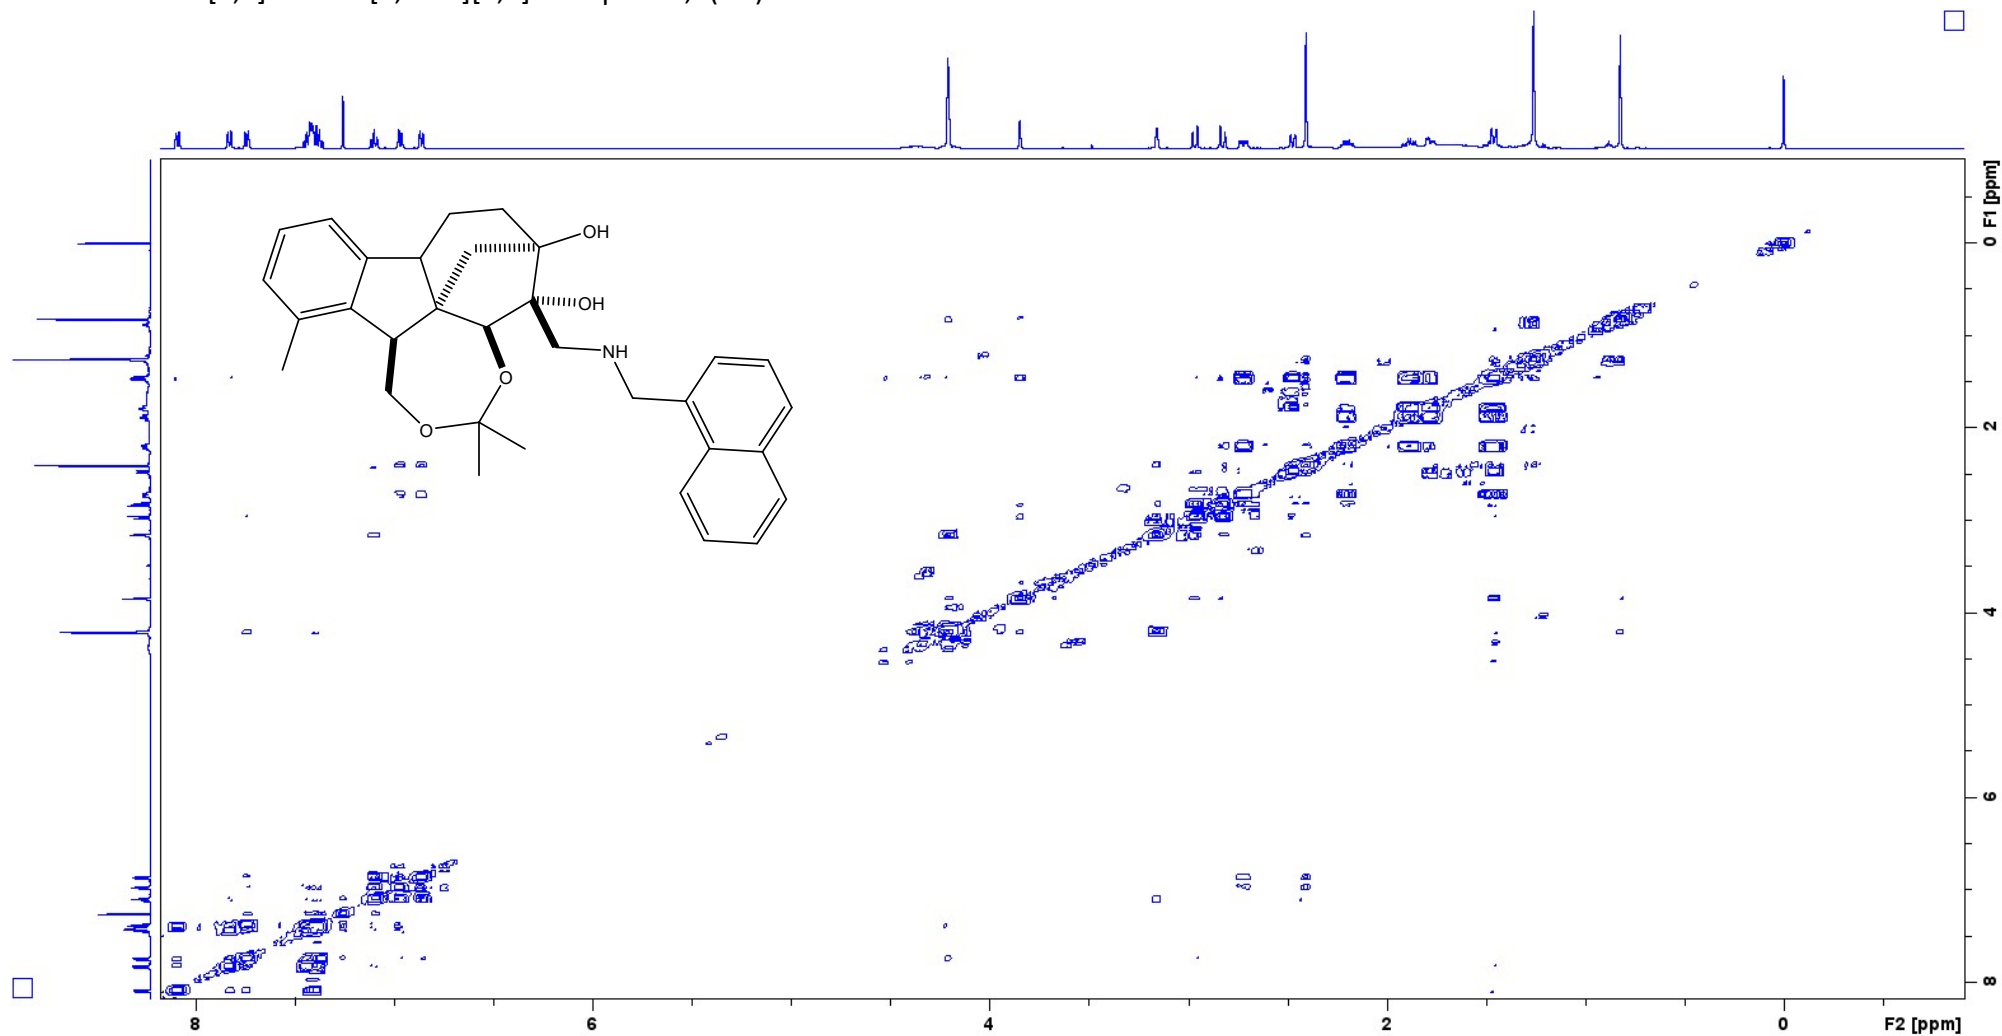

NOESY of (4a*S*,4a<sup>1</sup>*R*,5*R*,6*S*,12*bS*)-3,3,12-Trimethyl-5-(((naphthalen-1-ylmethyl)amino)methyl)-4a,5,7,8,8a,12b-hexahydro-4a<sup>1</sup>,6-methanobenzo[2,3]azuleno[8,1-de][1,3]dioxepine-5,6(1*H*)-diol **12**

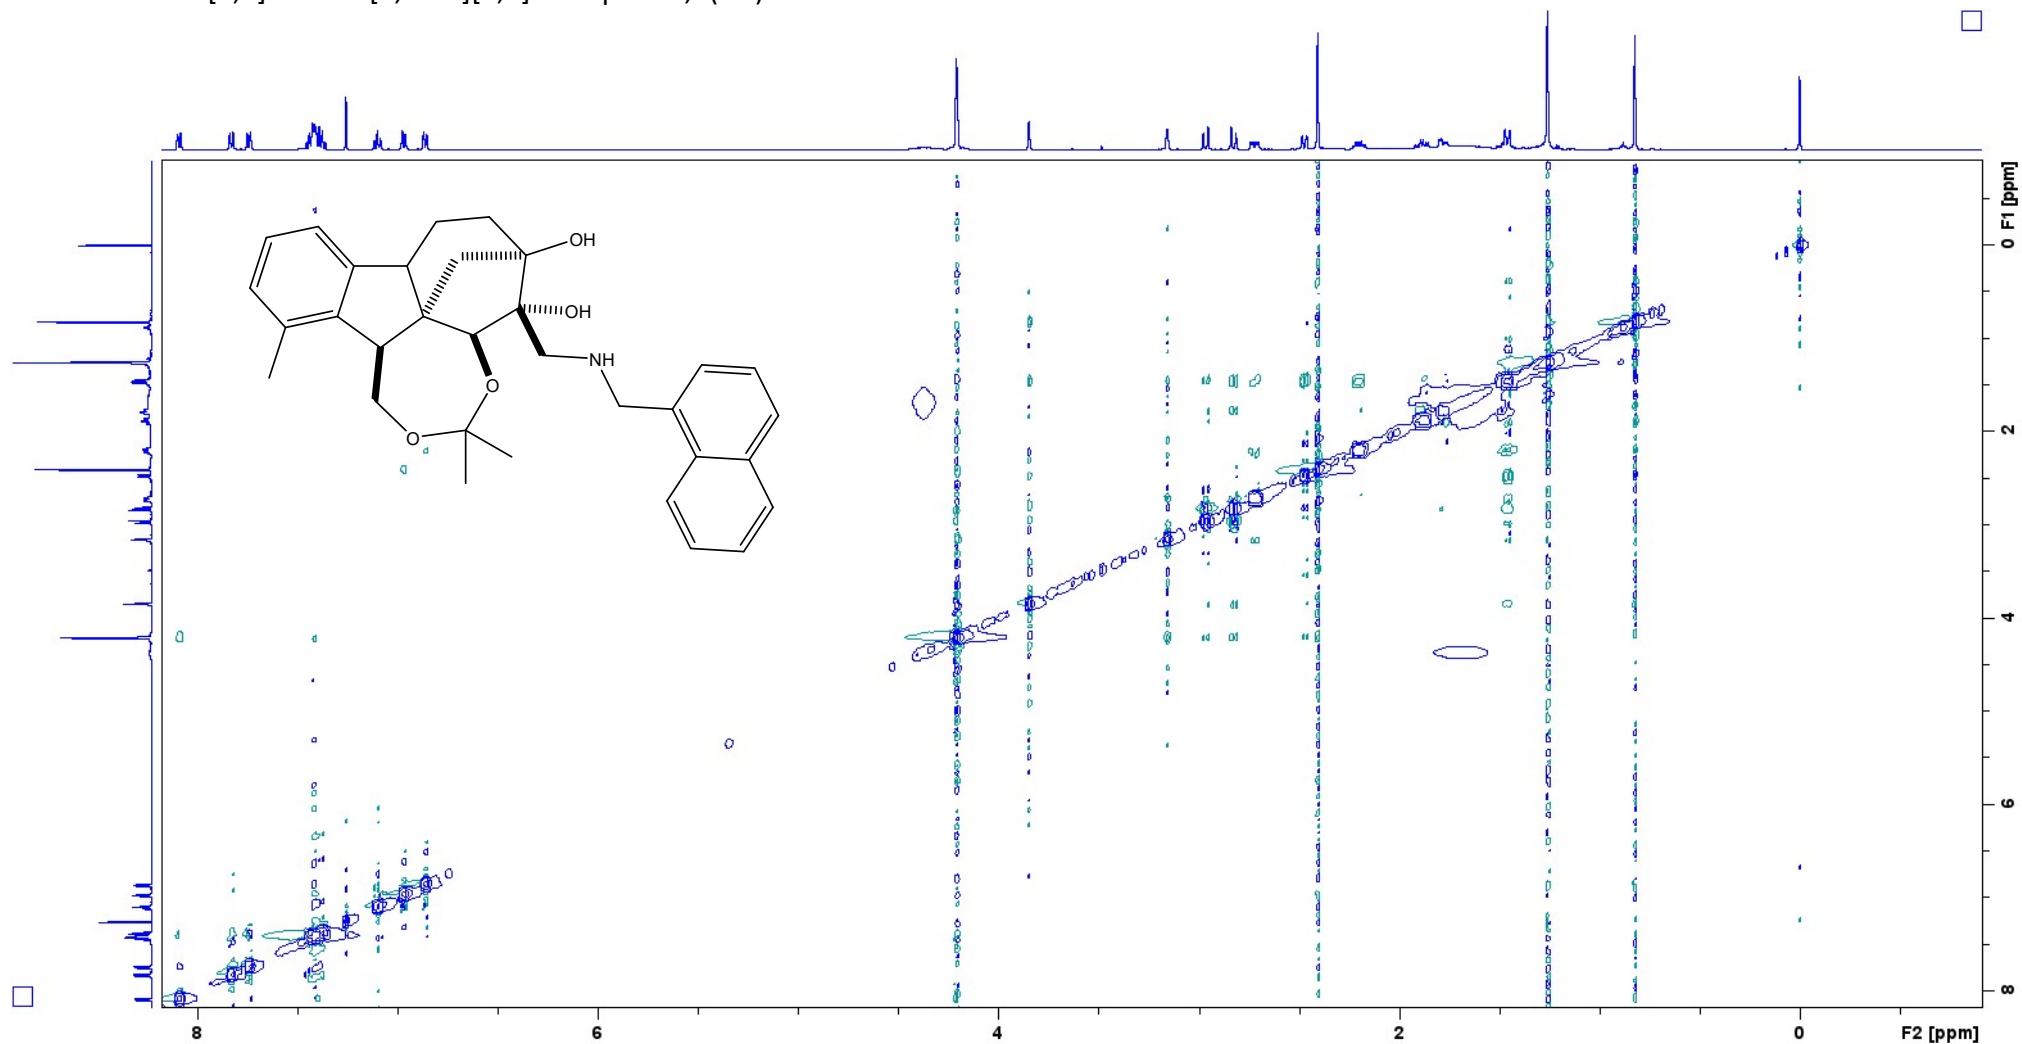

HSQC of (4*a*S,4*a*<sup>1</sup>*R*,5*R*,6*S*,12*b*S)-3,3,12-Trimethyl-5-(((naphthalen-1-ylmethyl)amino)methyl)-4*a*,5,7,8,8*a*,12*b*-hexahydro-4*a*<sup>1</sup>,6-methanobenzo[2,3]azuleno[8,1-*de*][1,3]dioxepine-5,6(1*H*)-diol **12**

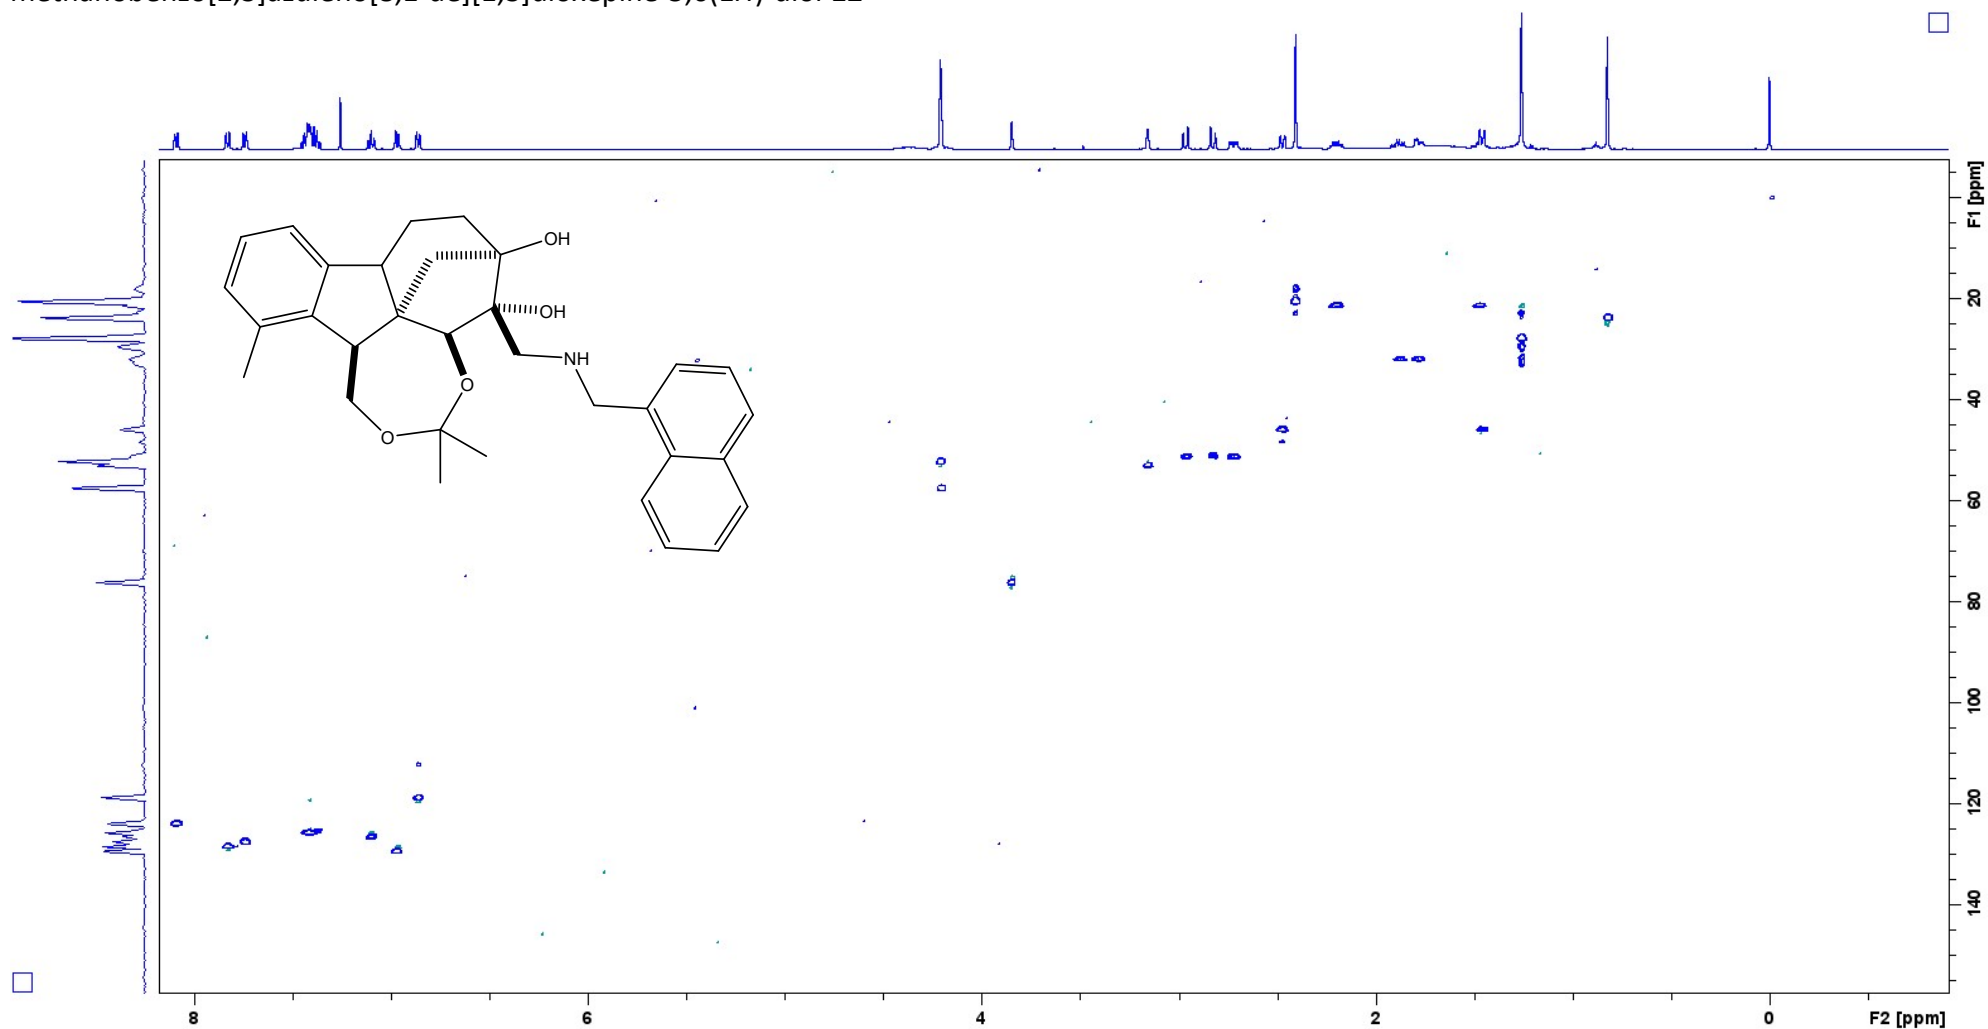

HMBC of (4*a*S,4*a*<sup>1</sup>*R*,5*R*,6*S*,12*b*S)-3,3,12-Trimethyl-5-(((naphthalen-1-ylmethyl)amino)methyl)-4*a*,5,7,8,8*a*,12*b*-hexahydro-4*a*<sup>1</sup>,6-methanobenzo[2,3]azuleno[8,1-*de*][1,3]dioxepine-5,6(1*H*)-diol **12**

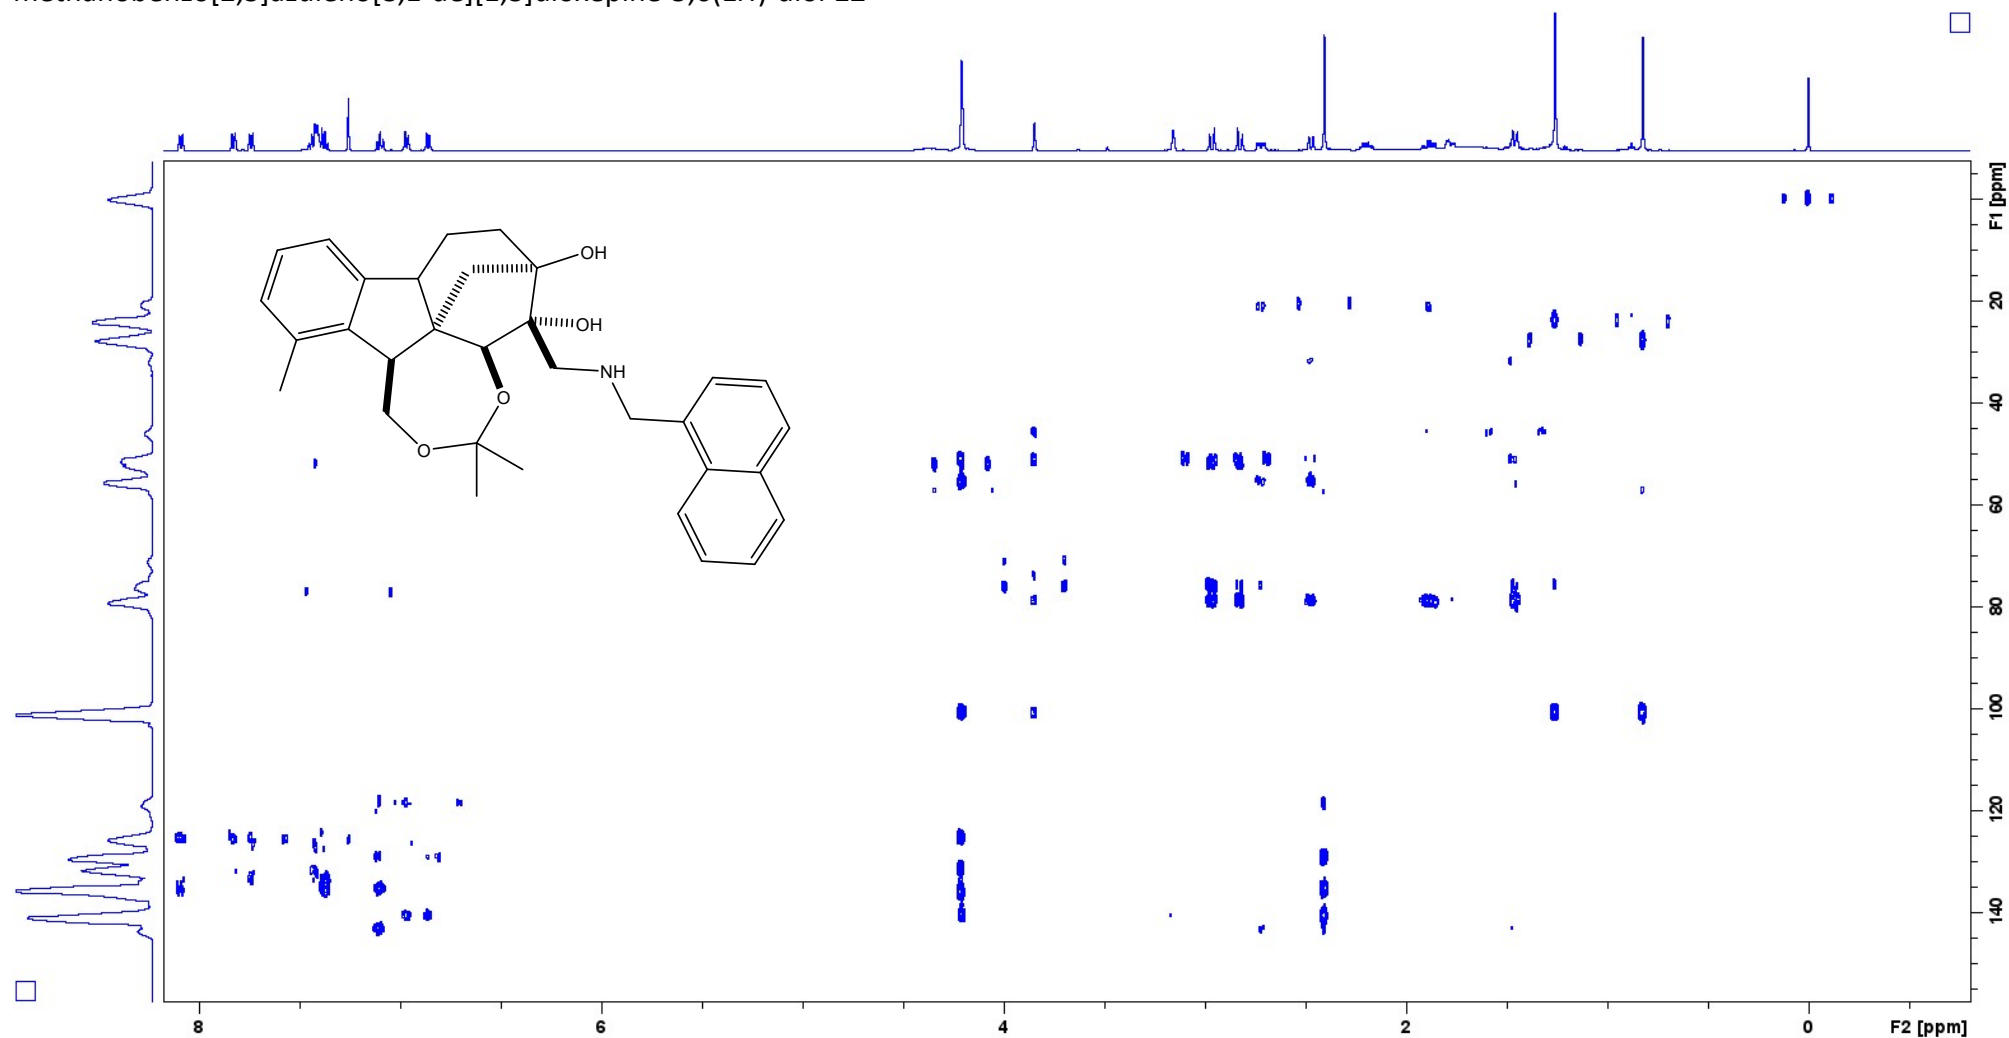

$^1\text{H-NMR}$  (500 MHz) of (4*a*S,4*a*<sup>1</sup>*R*,5*R*,6*S*,12*b*S)-3,3,12-Trimethyl-5-(((*S*)-1-(naphthalen-2-yl)ethyl)amino)methyl)-4*a*,5,7,8,8*a*,12*b*-hexahydro-4*a*<sup>1</sup>,6-methanobenzo[2,3]azuleno[8,1-*de*][1,3]dioxepine-5,6(1*H*)-diol **13**

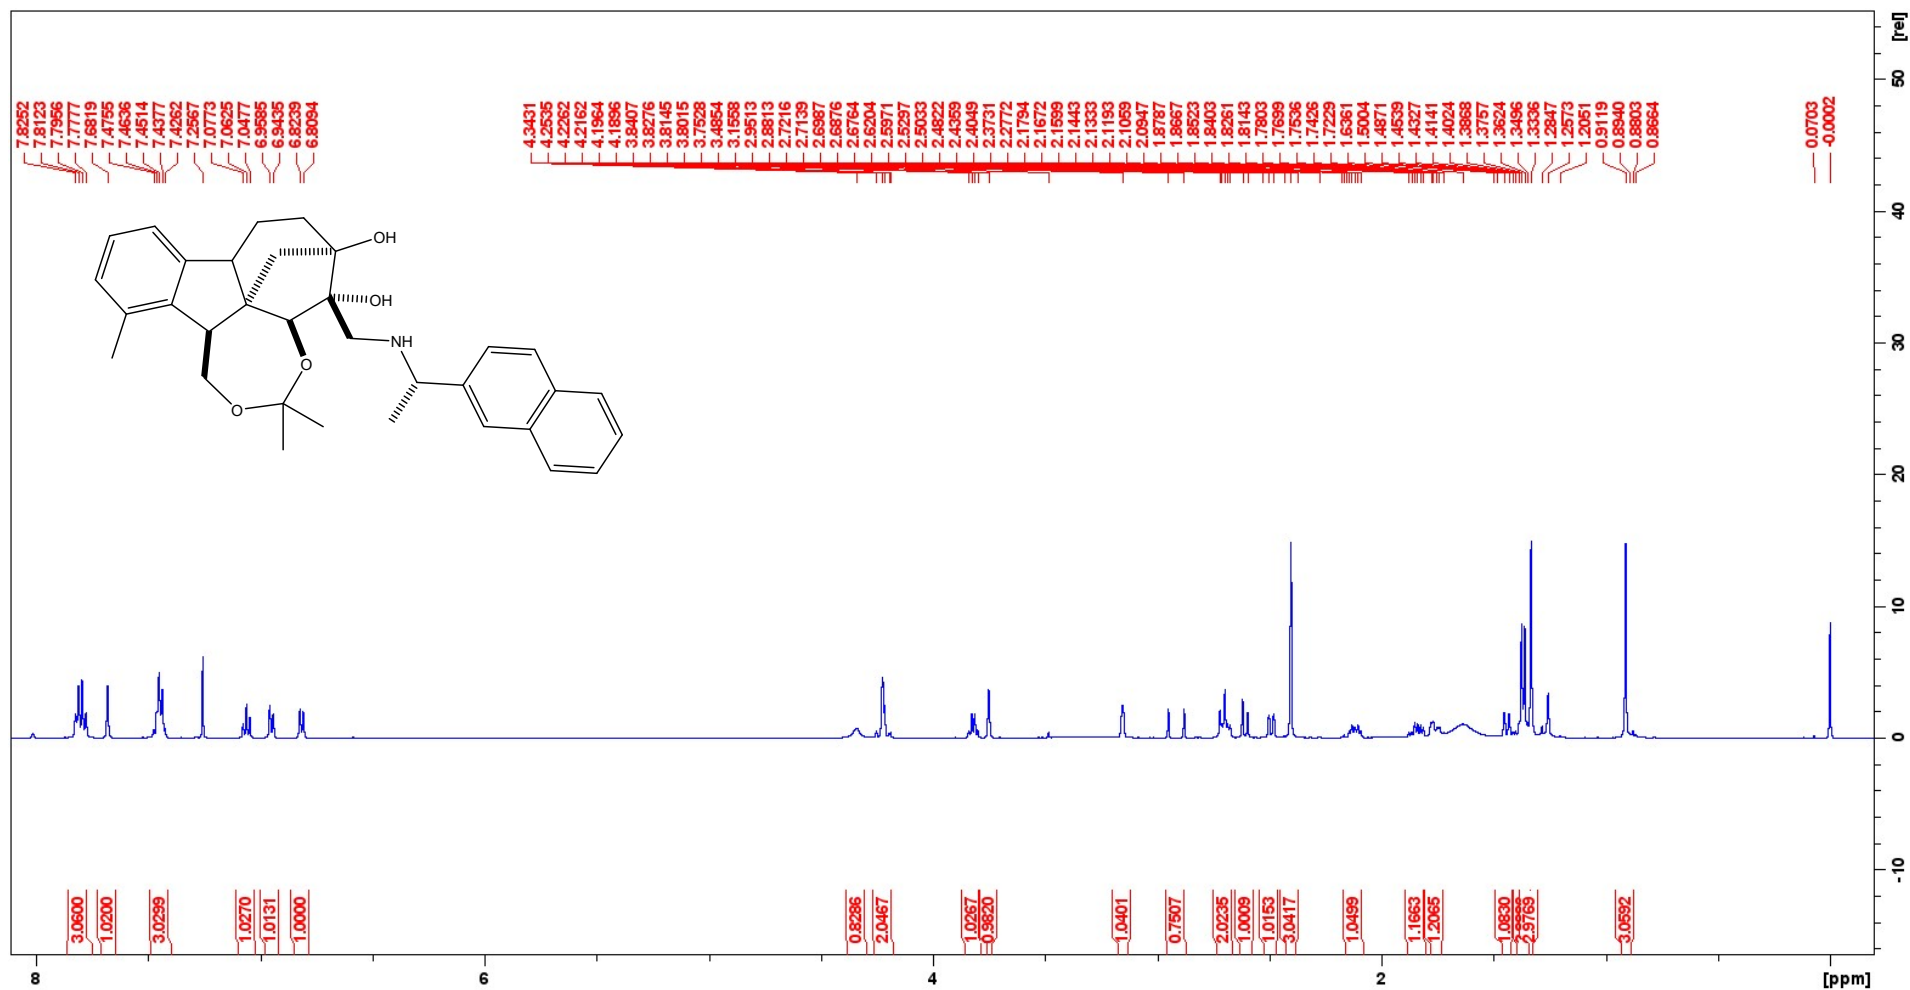



$^{13}\text{C}\{^1\text{H}\}$  *J*-MOD NMR (125 MHz) of (4a*S*,4a<sup>1</sup>*R*,5*R*,6*S*,12*bS*)-3,3,12-Trimethyl-5-((((*S*)-1-(naphthalen-2-yl)ethyl)amino)methyl)-4a,5,7,8,8a,12b-hexahydro-4a<sup>1</sup>,6-methanobenzo[2,3]azuleno[8,1-de][1,3]dioxepine-5,6(1*H*)-diol **13**

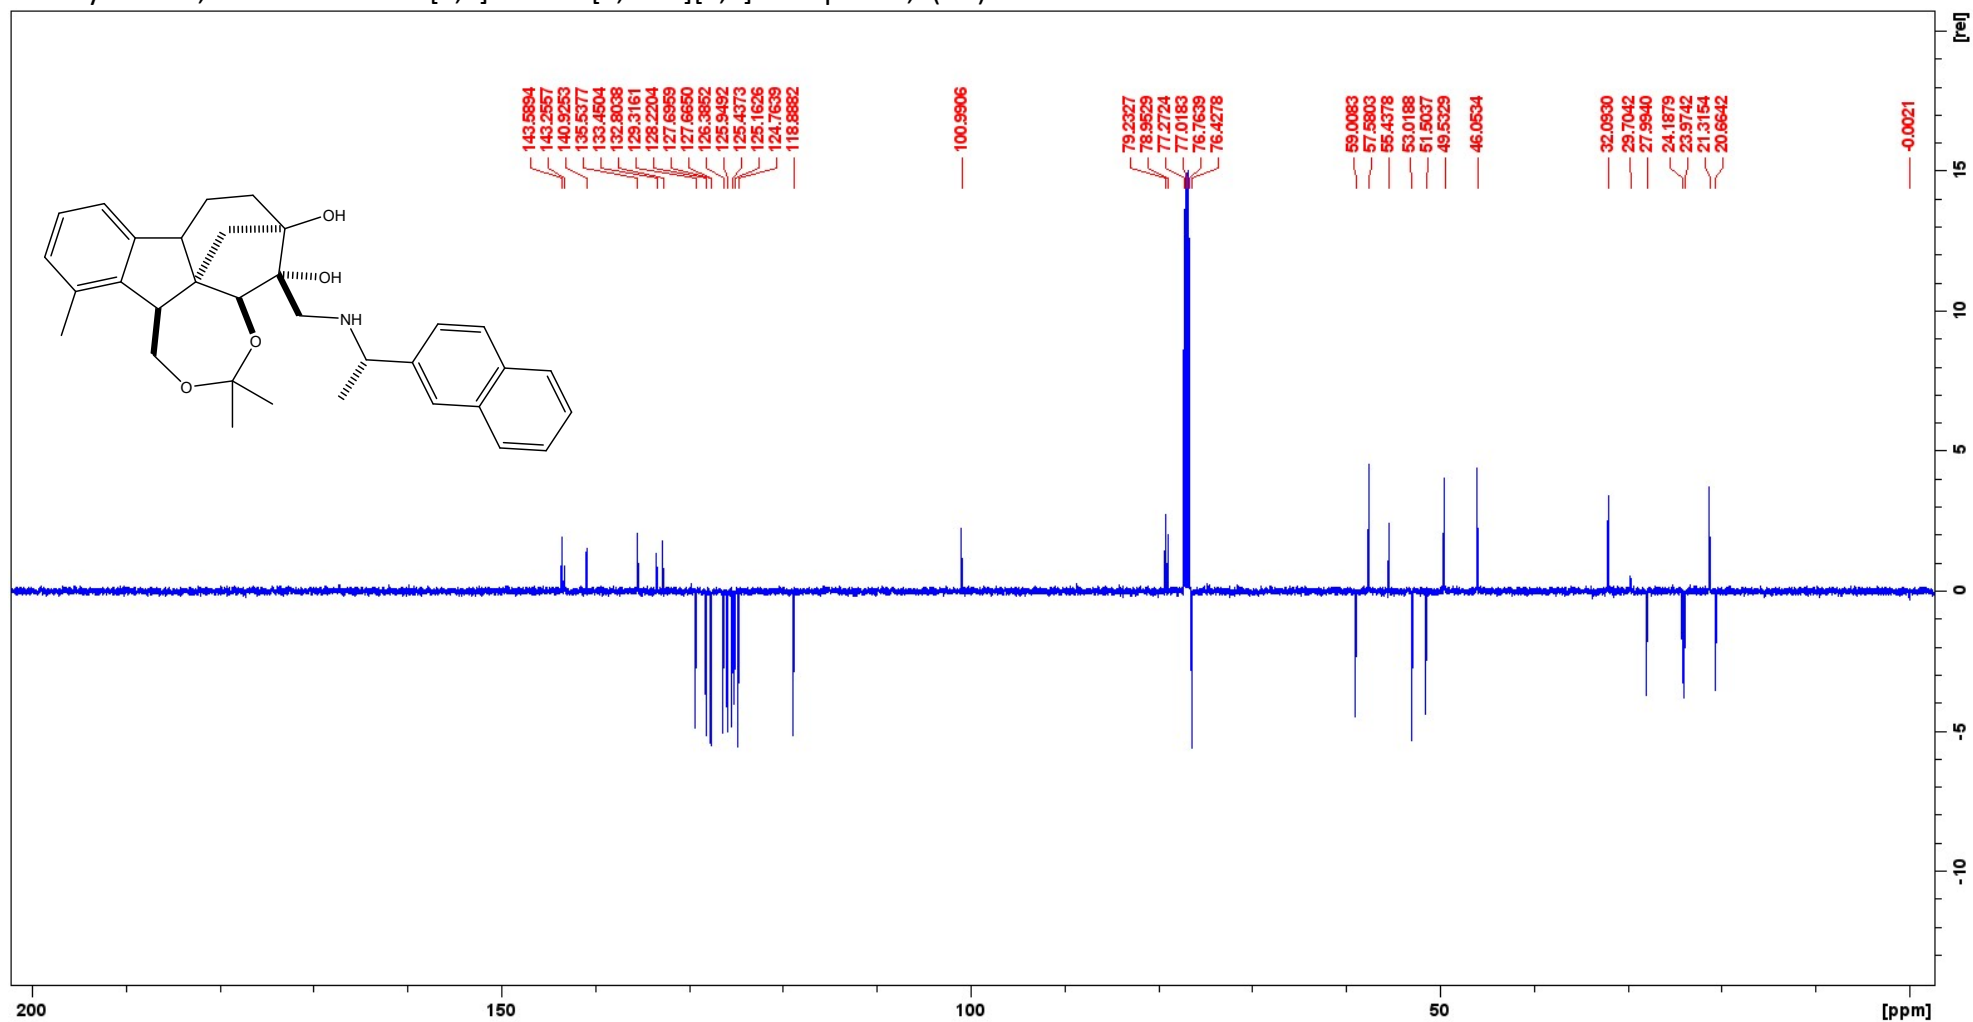

COSY of (4a*S*,4a<sup>1</sup>*R*,5*R*,6*S*,12*bS*)-3,3,12-Trimethyl-5-(((*S*)-1-(naphthalen-2-yl)ethyl)amino)methyl)-4a,5,7,8,8a,12*b*-hexahydro-4a<sup>1</sup>,6-methanobenzo[2,3]azuleno[8,1-*de*][1,3]dioxepine-5,6(1*H*)-diol **13**

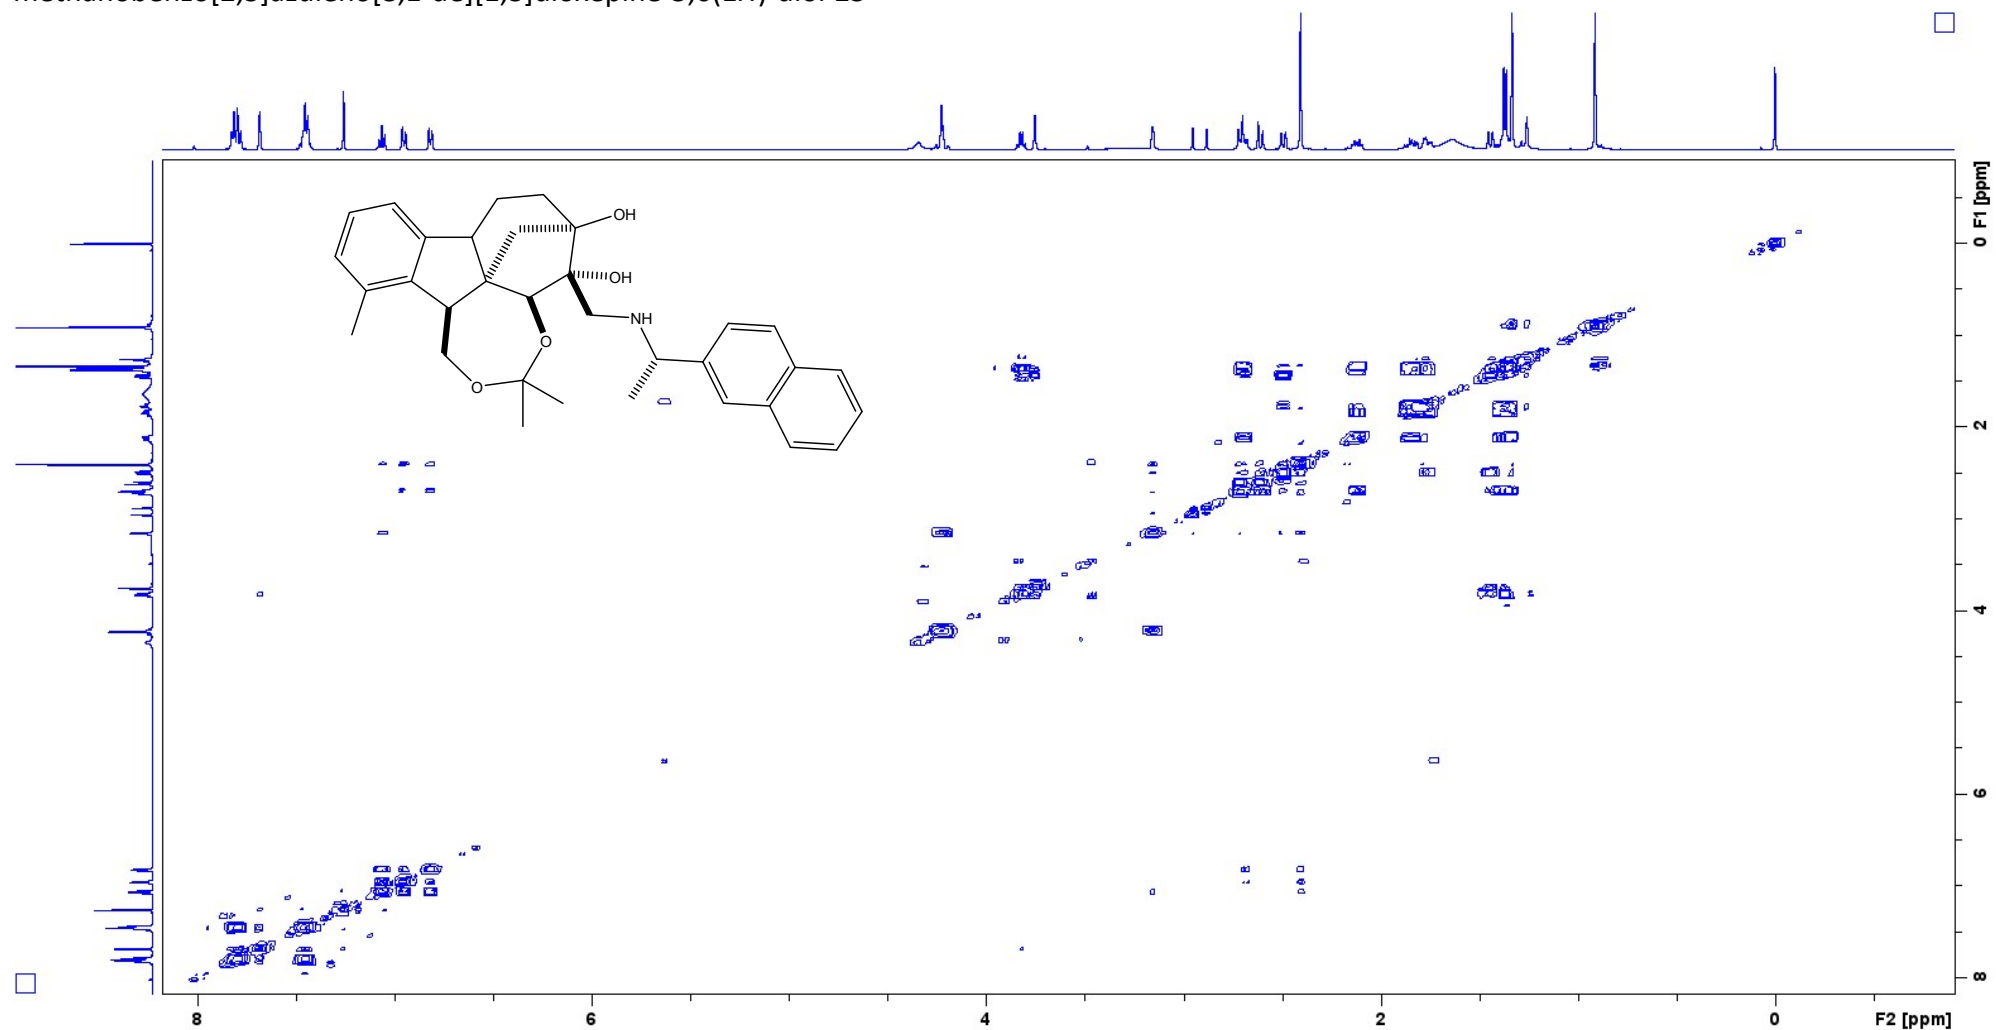

NOESY of (4*a*S,4*a*<sup>1</sup>*R*,5*R*,6*S*,12*b**S*)-3,3,12-Trimethyl-5-(((*S*)-1-(naphthalen-2-yl)ethyl)amino)methyl)-4*a*,5,7,8,8*a*,12*b*-hexahydro-4*a*<sup>1</sup>,6-methanobenzo[2,3]azuleno[8,1-*de*][1,3]dioxepine-5,6(1*H*)-diol **13**

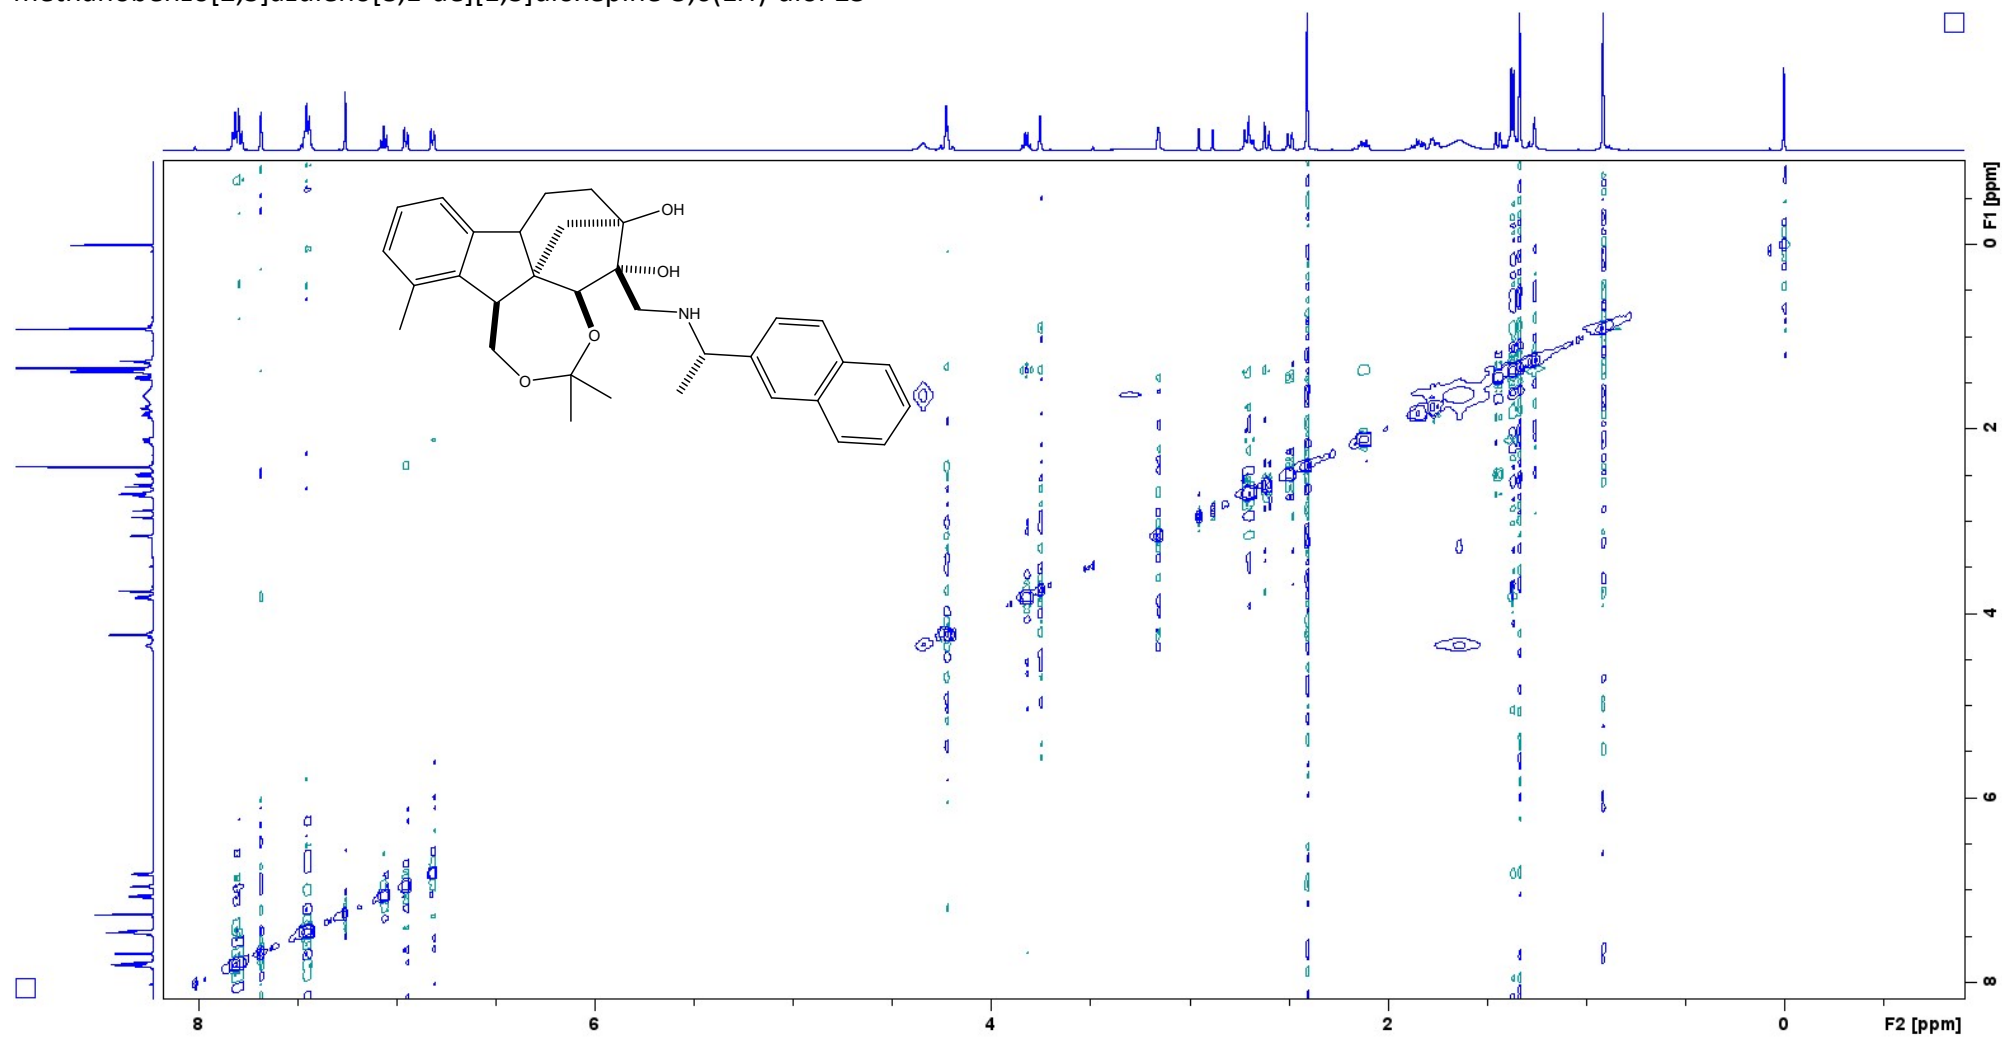

HSQC of (4*a*S,4*a*<sup>1</sup>*R*,5*R*,6*S*,12*b*S)-3,3,12-Trimethyl-5-(((*S*)-1-(naphthalen-2-yl)ethyl)amino)methyl)-4*a*,5,7,8,8*a*,12*b*-hexahydro-4*a*<sup>1</sup>,6-methanobenzo[2,3]azuleno[8,1-*de*][1,3]dioxepine-5,6(1*H*)-diol **13**

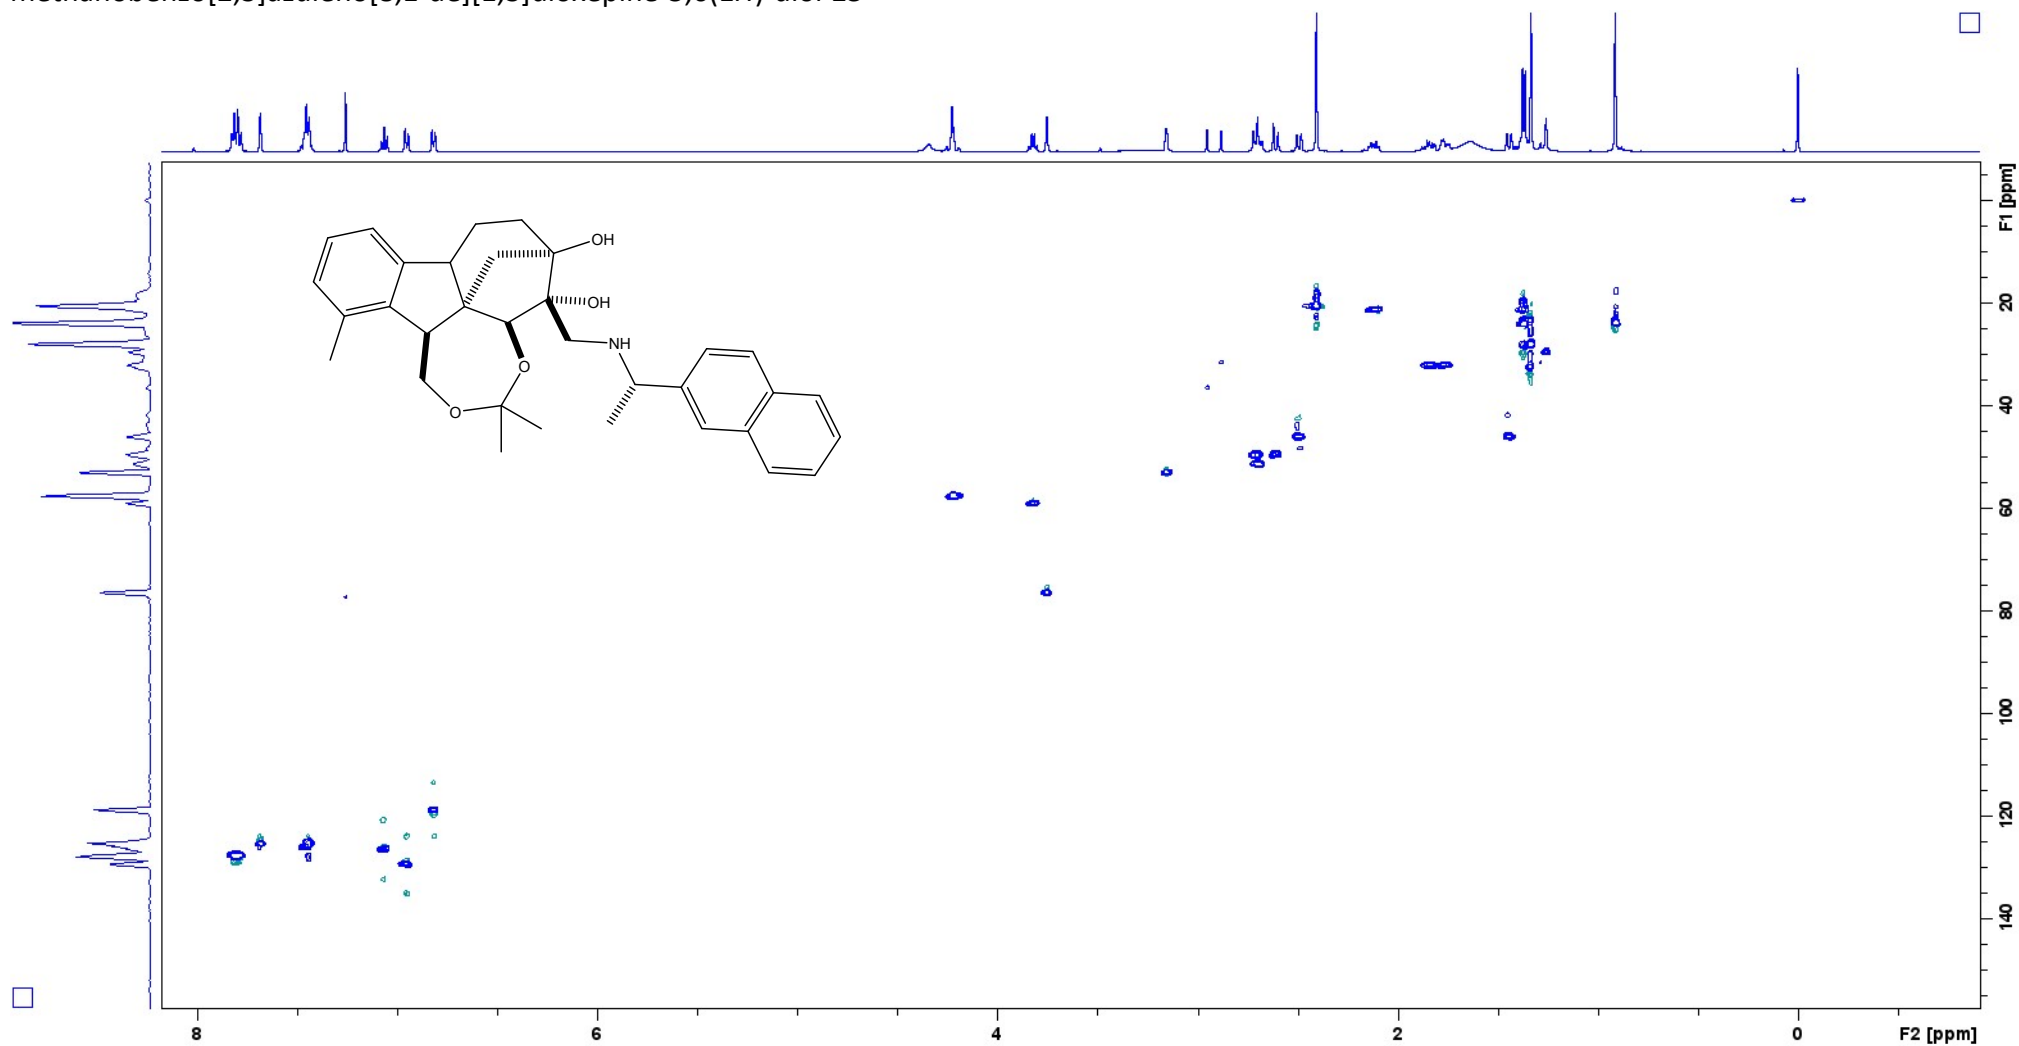

HMBC of (4a*S*,4a<sup>1</sup>*R*,5*R*,6*S*,12*bS*)-3,3,12-Trimethyl-5-(((*S*)-1-(naphthalen-2-yl)ethyl)amino)methyl)-4a,5,7,8,8a,12*b*-hexahydro-4a<sup>1</sup>,6-methanobenzo[2,3]azuleno[8,1-*de*][1,3]dioxepine-5,6(1*H*)-diol **13**

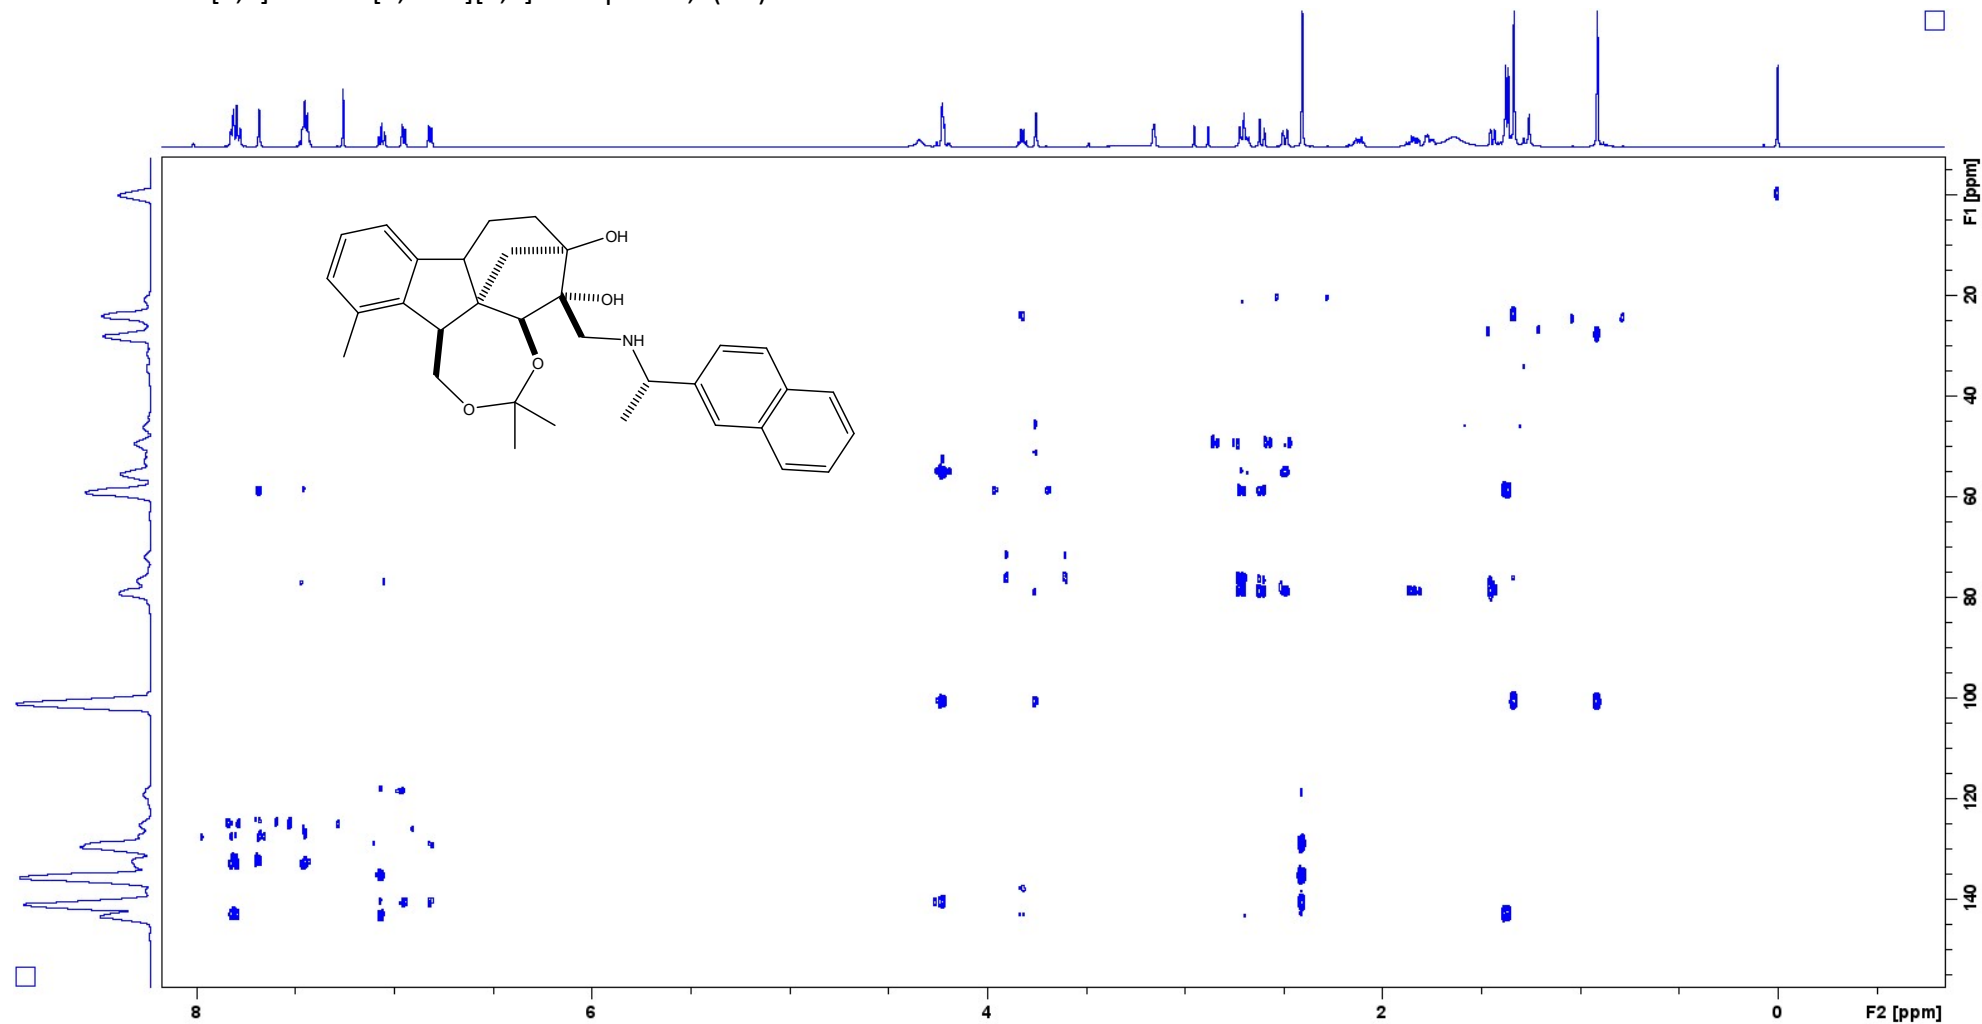

$^1\text{H-NMR}$  (500 MHz) of (4a*S*,4a<sup>1</sup>*R*,5*R*,6*S*,12b*S*)-3,3,12-Trimethyl-5-(((*R*)-1-(naphthalen-2-yl)ethyl)amino)methyl)-4a,5,7,8,8a,12b-hexahydro-4a<sup>1</sup>,6-methanobenzo[2,3]azuleno[8,1-de][1,3]dioxepine-5,6(1*H*)-diol **14**

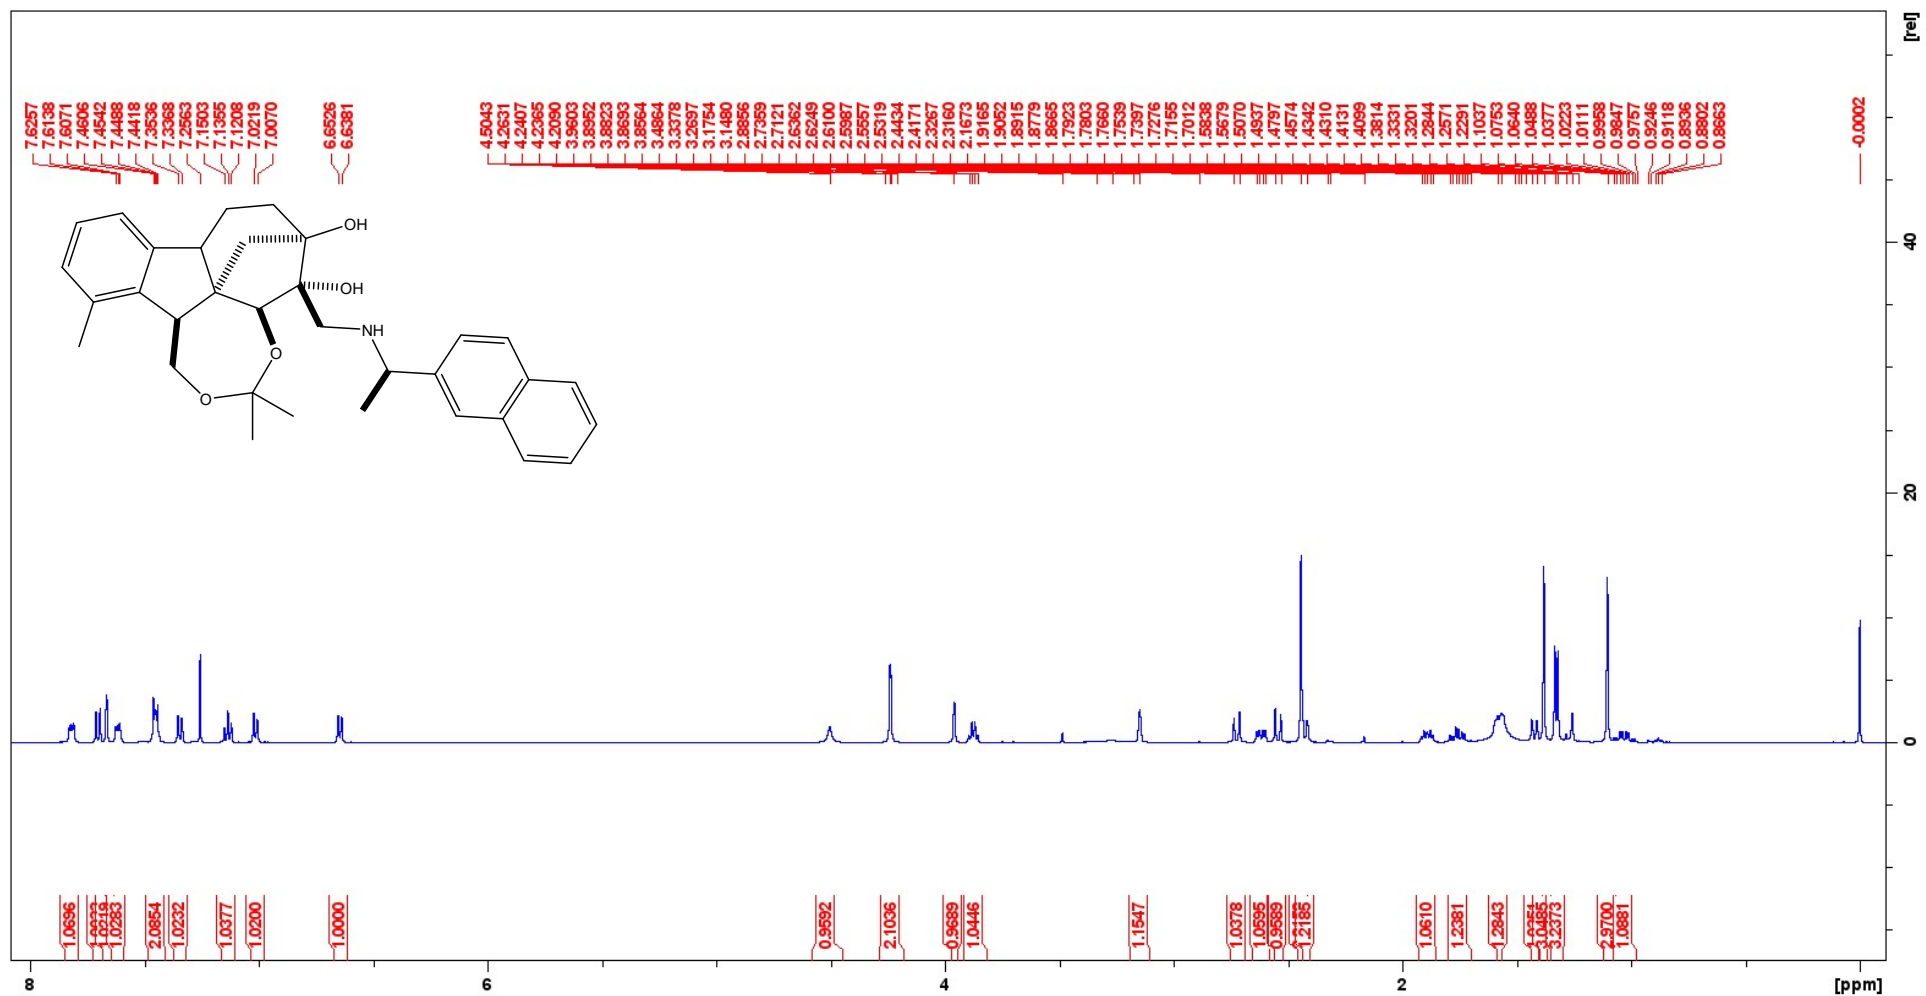

$^{13}\text{C}\{^1\text{H}\}$  J-MOD NMR (125 MHz) of (4a*S*,4a<sup>1</sup>*R*,5*R*,6*S*,12*bS*)-3,3,12-Trimethyl-5-(((*R*)-1-(naphthalen-2-yl)ethyl)amino)methyl)-4a,5,7,8,8a,12b-hexahydro-4a<sup>1</sup>,6-methanobenzo[2,3]azuleno[8,1-de][1,3]dioxepine-5,6(1*H*)-diol **14**

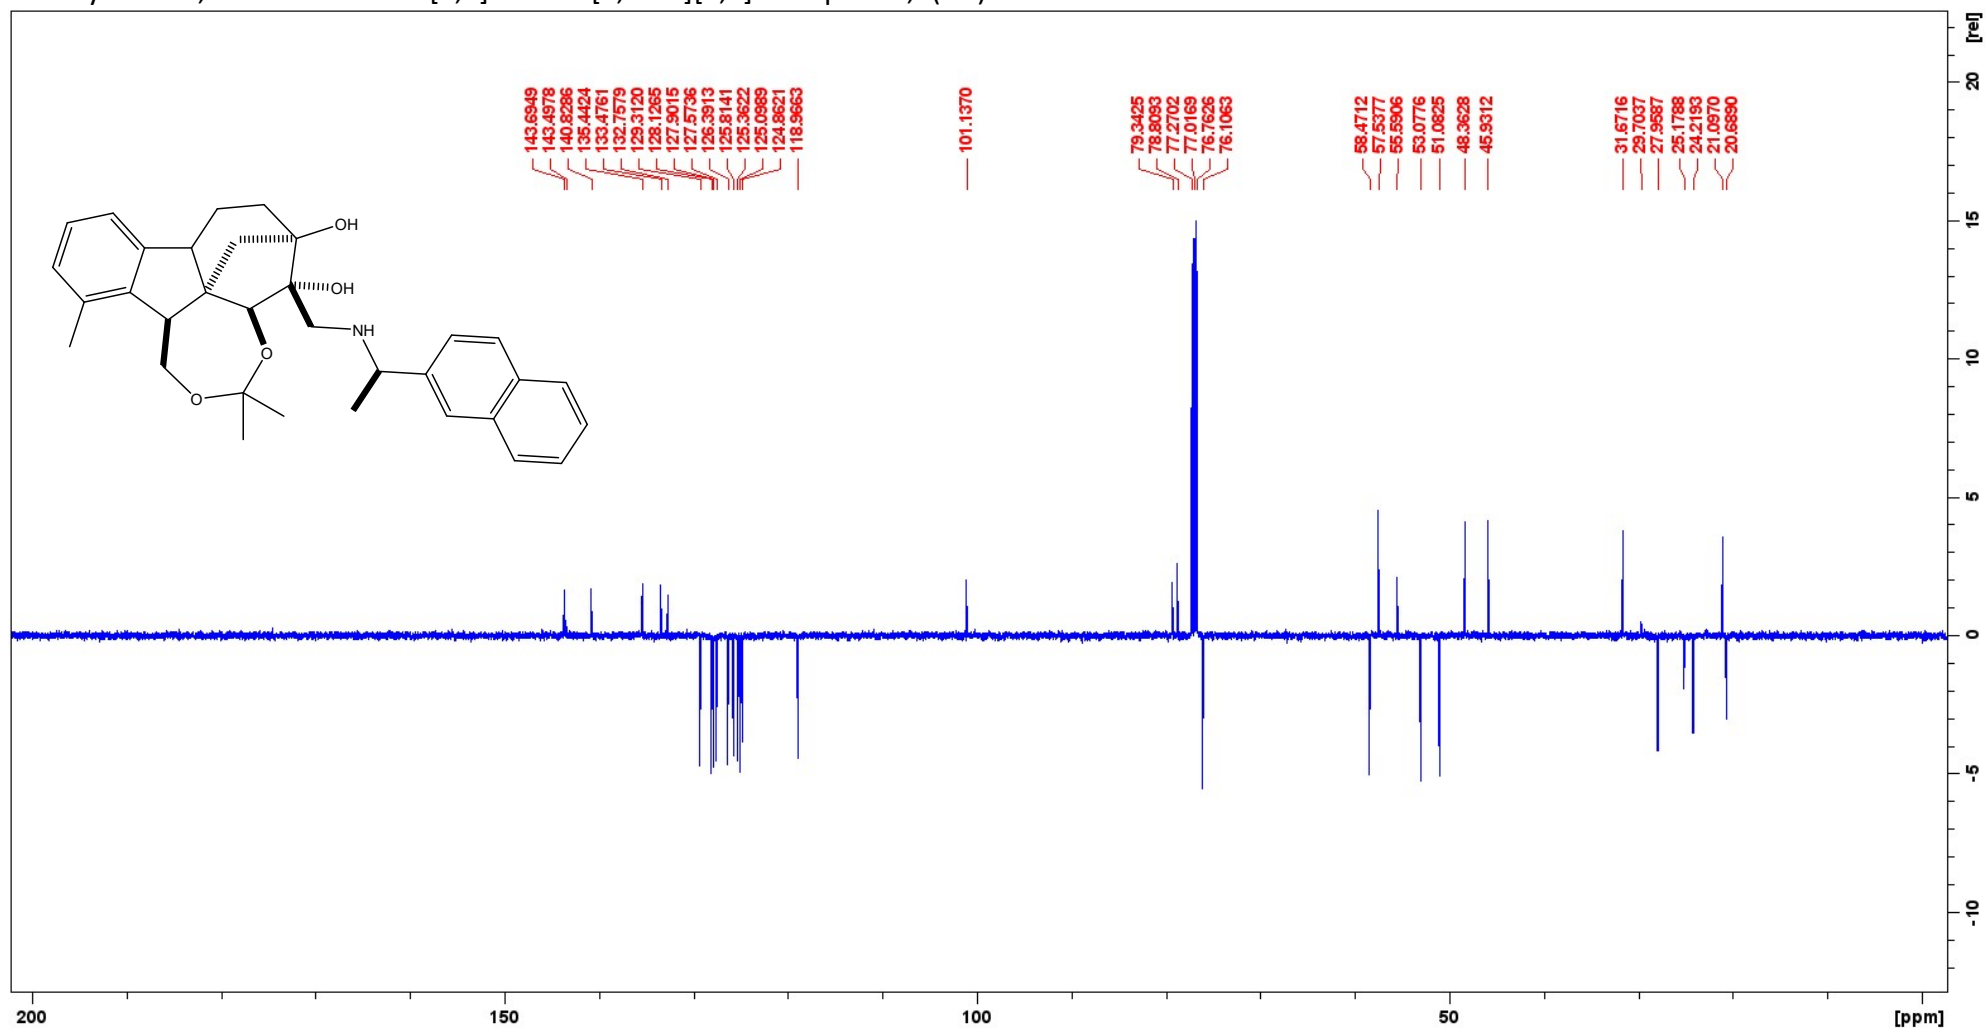

COSY of (4*a*S,4*a*<sup>1</sup>*R*,5*R*,6*S*,12*b**S*)-3,3,12-Trimethyl-5-(((*R*)-1-(naphthalen-2-yl)ethyl)amino)methyl)-4*a*,5,7,8,8*a*,12*b*-hexahydro-4*a*<sup>1</sup>,6-methanobenzo[2,3]azuleno[8,1-*de*][1,3]dioxepine-5,6(1*H*)-diol **14**

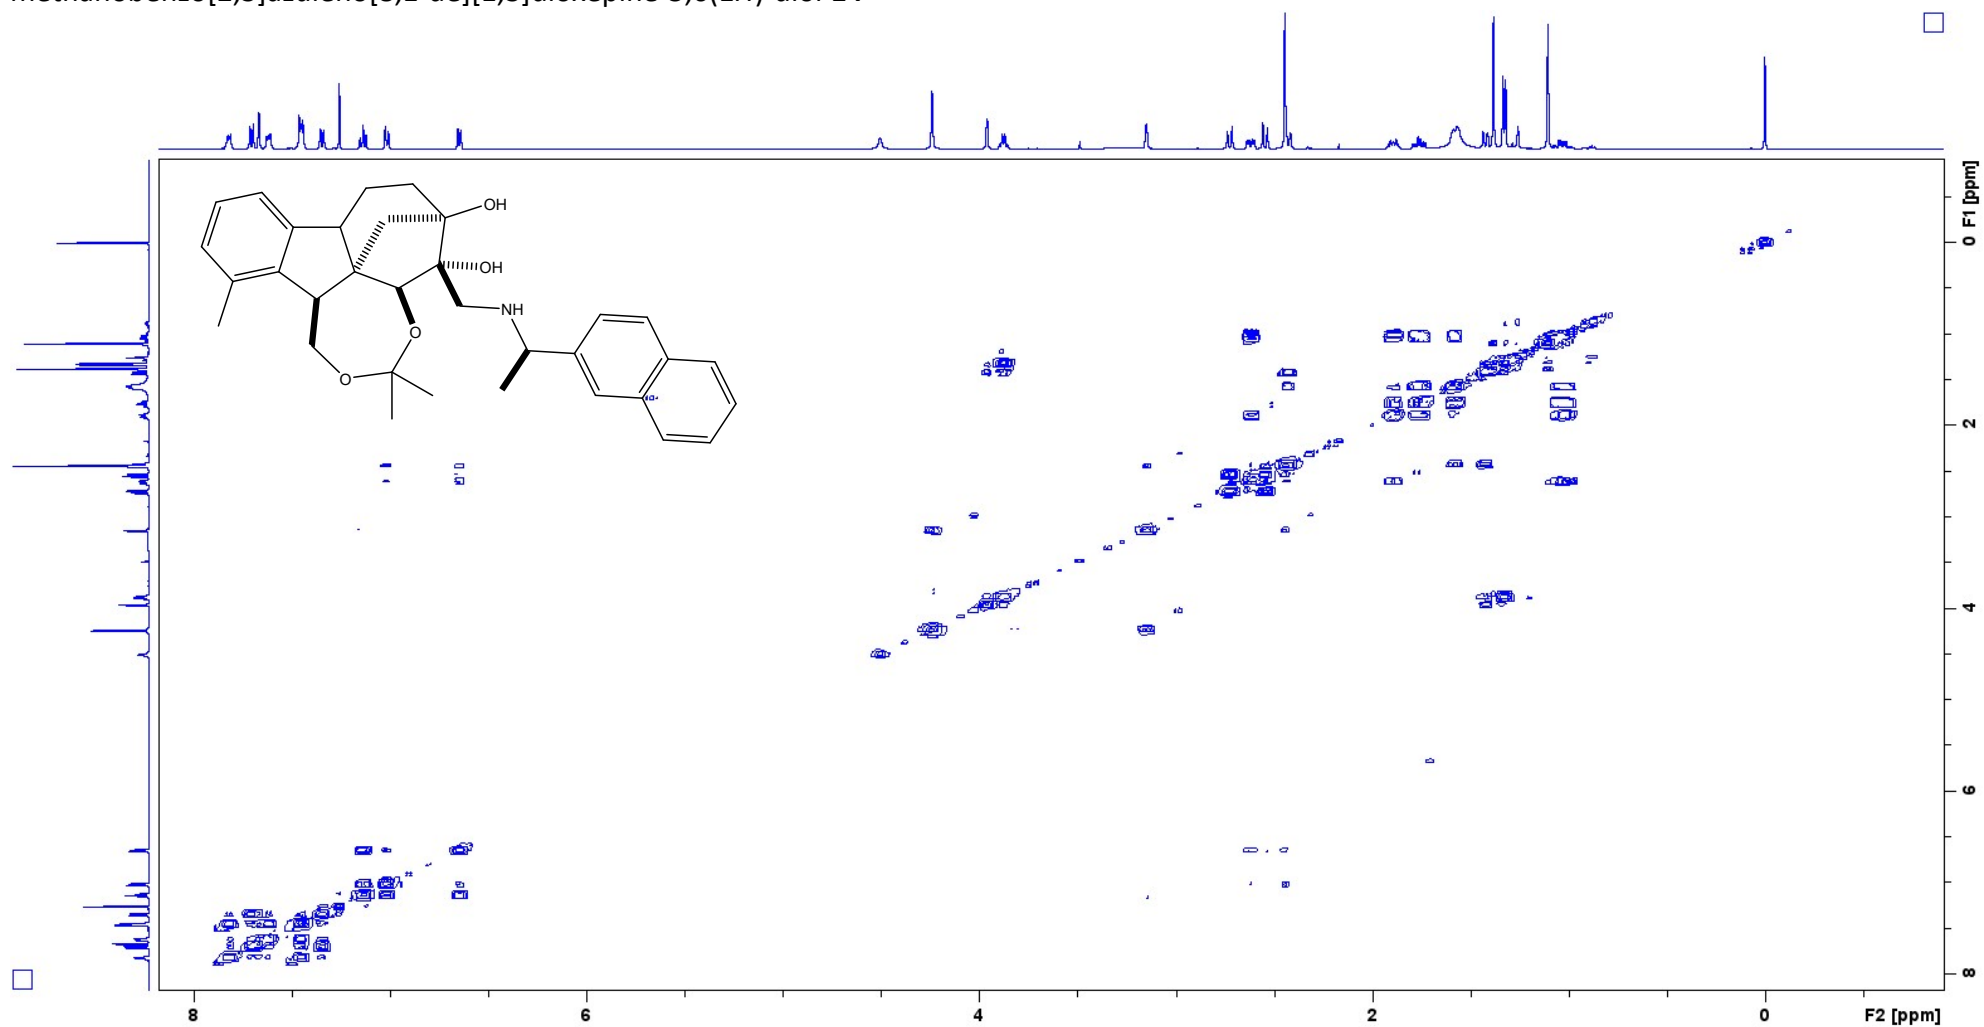



NOESY of (4*a*S,4*a*<sup>1</sup>*R*,5*R*,6*S*,12*b**S*)-3,3,12-Trimethyl-5-(((*R*)-1-(naphthalen-2-yl)ethyl)amino)methyl)-4*a*,5,7,8,8*a*,12*b*-hexahydro-4*a*<sup>1</sup>,6-methanobenzo[2,3]azuleno[8,1-*de*][1,3]dioxepine-5,6(1*H*)-diol **14**

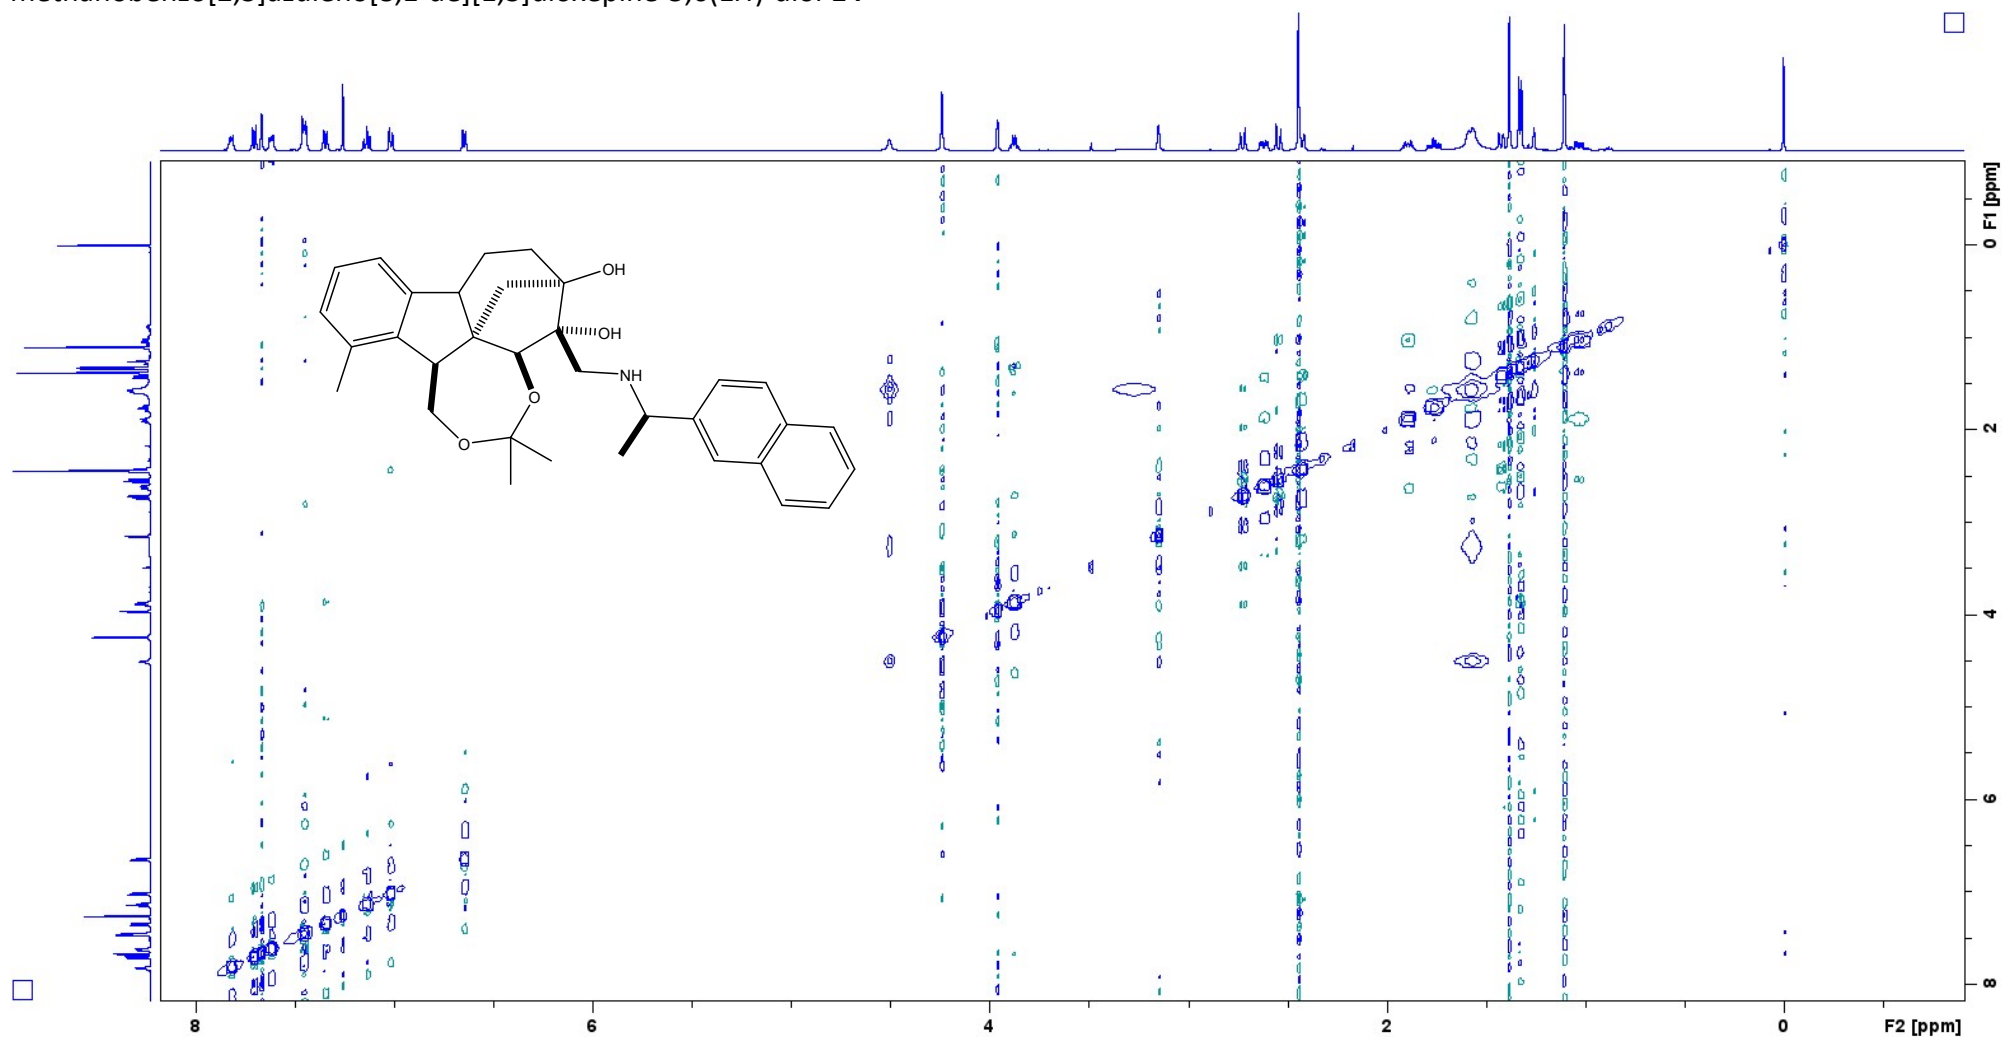

HSQC of (4*S*,4*a*<sup>1</sup>*R*,5*R*,6*S*,12*bS*)-3,3,12-Trimethyl-5-(((*R*)-1-(naphthalen-2-yl)ethyl)amino)methyl)-4*a*,5,7,8,8*a*,12*b*-hexahydro-4*a*<sup>1</sup>,6-methanobenzo[2,3]azuleno[8,1-*de*][1,3]dioxepine-5,6(1*H*)-diol **14**

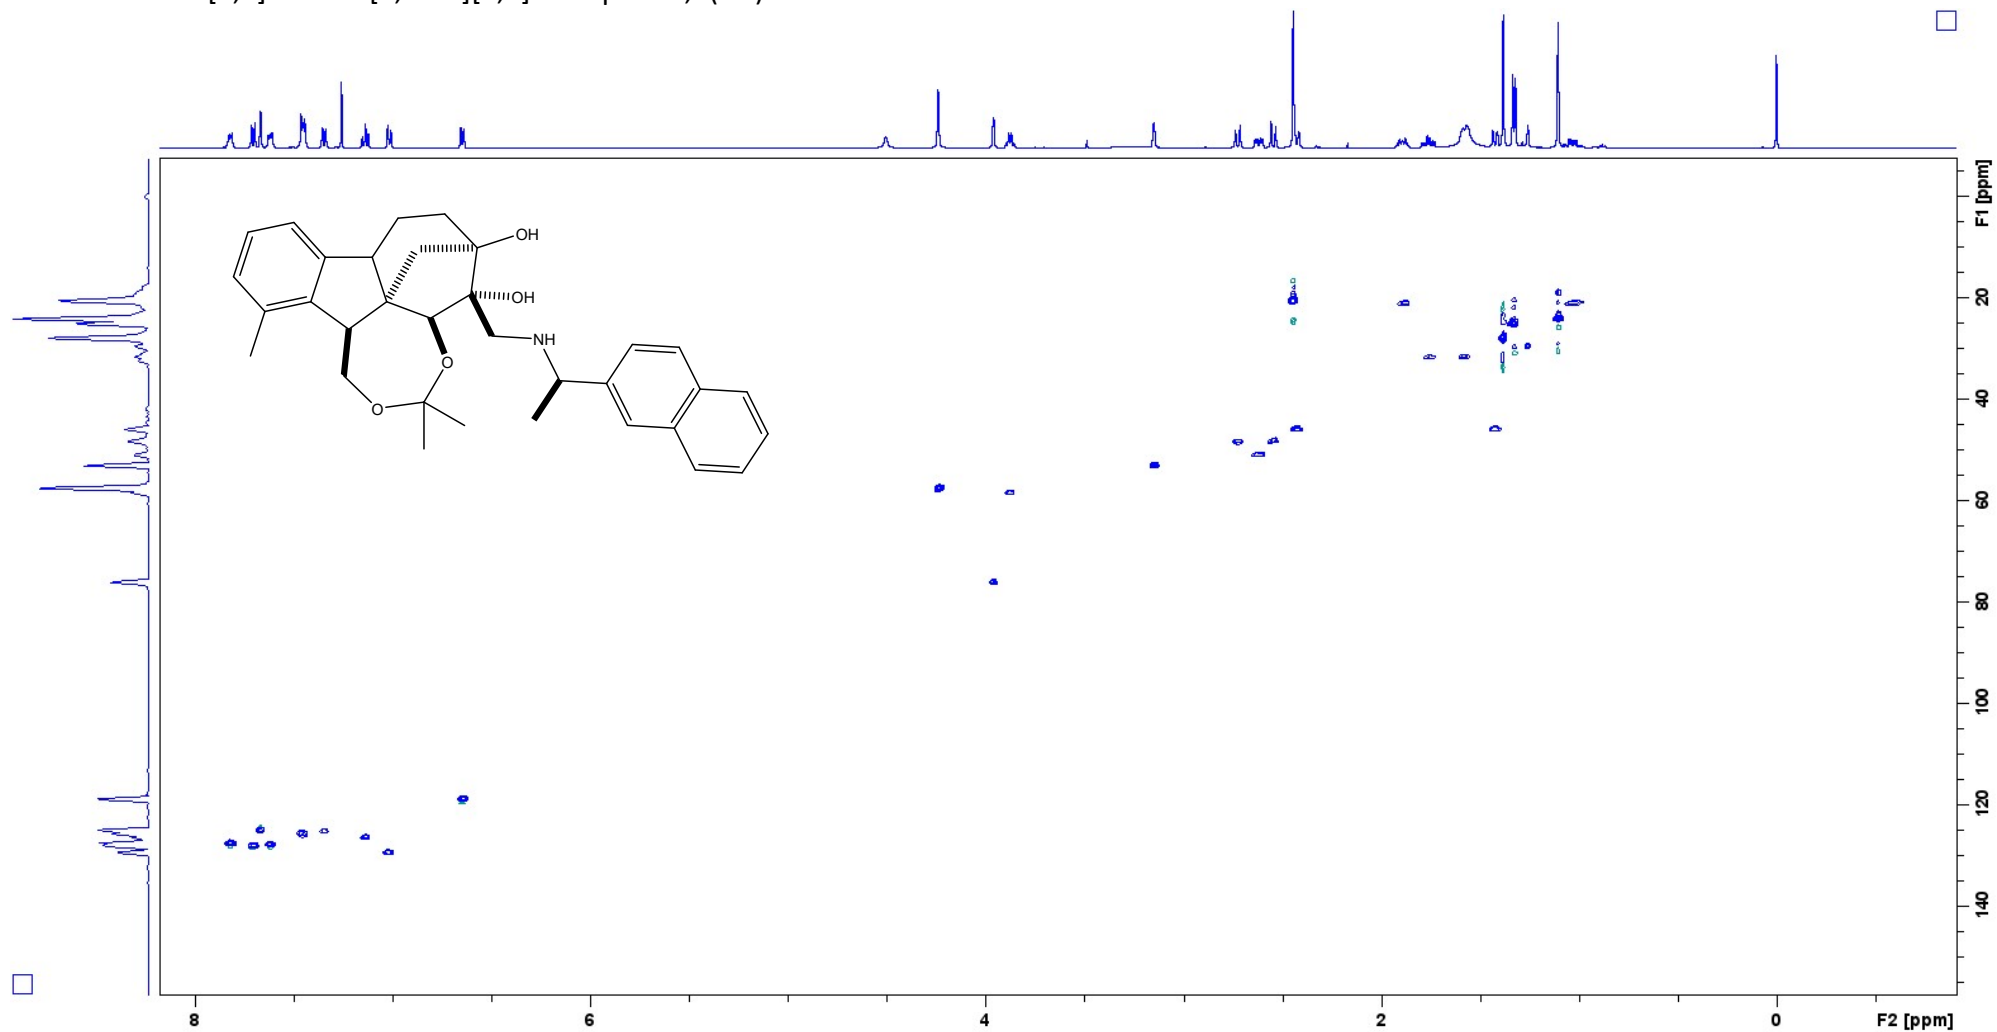

HMBC

(4*a*S,4*a*<sup>1</sup>*R*,5*R*,6*S*,12*b*S)-3,3,12-Trimethyl-5-(((*R*)-1-(naphthalen-2-yl)ethyl)amino)methyl)-4*a*,5,7,8,8*a*,12*b*-hexahydro-4*a*<sup>1</sup>,6-methanobenzo[2,3]azuleno[8,1-*de*][1,3]dioxepine-5,6(1*H*)-diol **14**

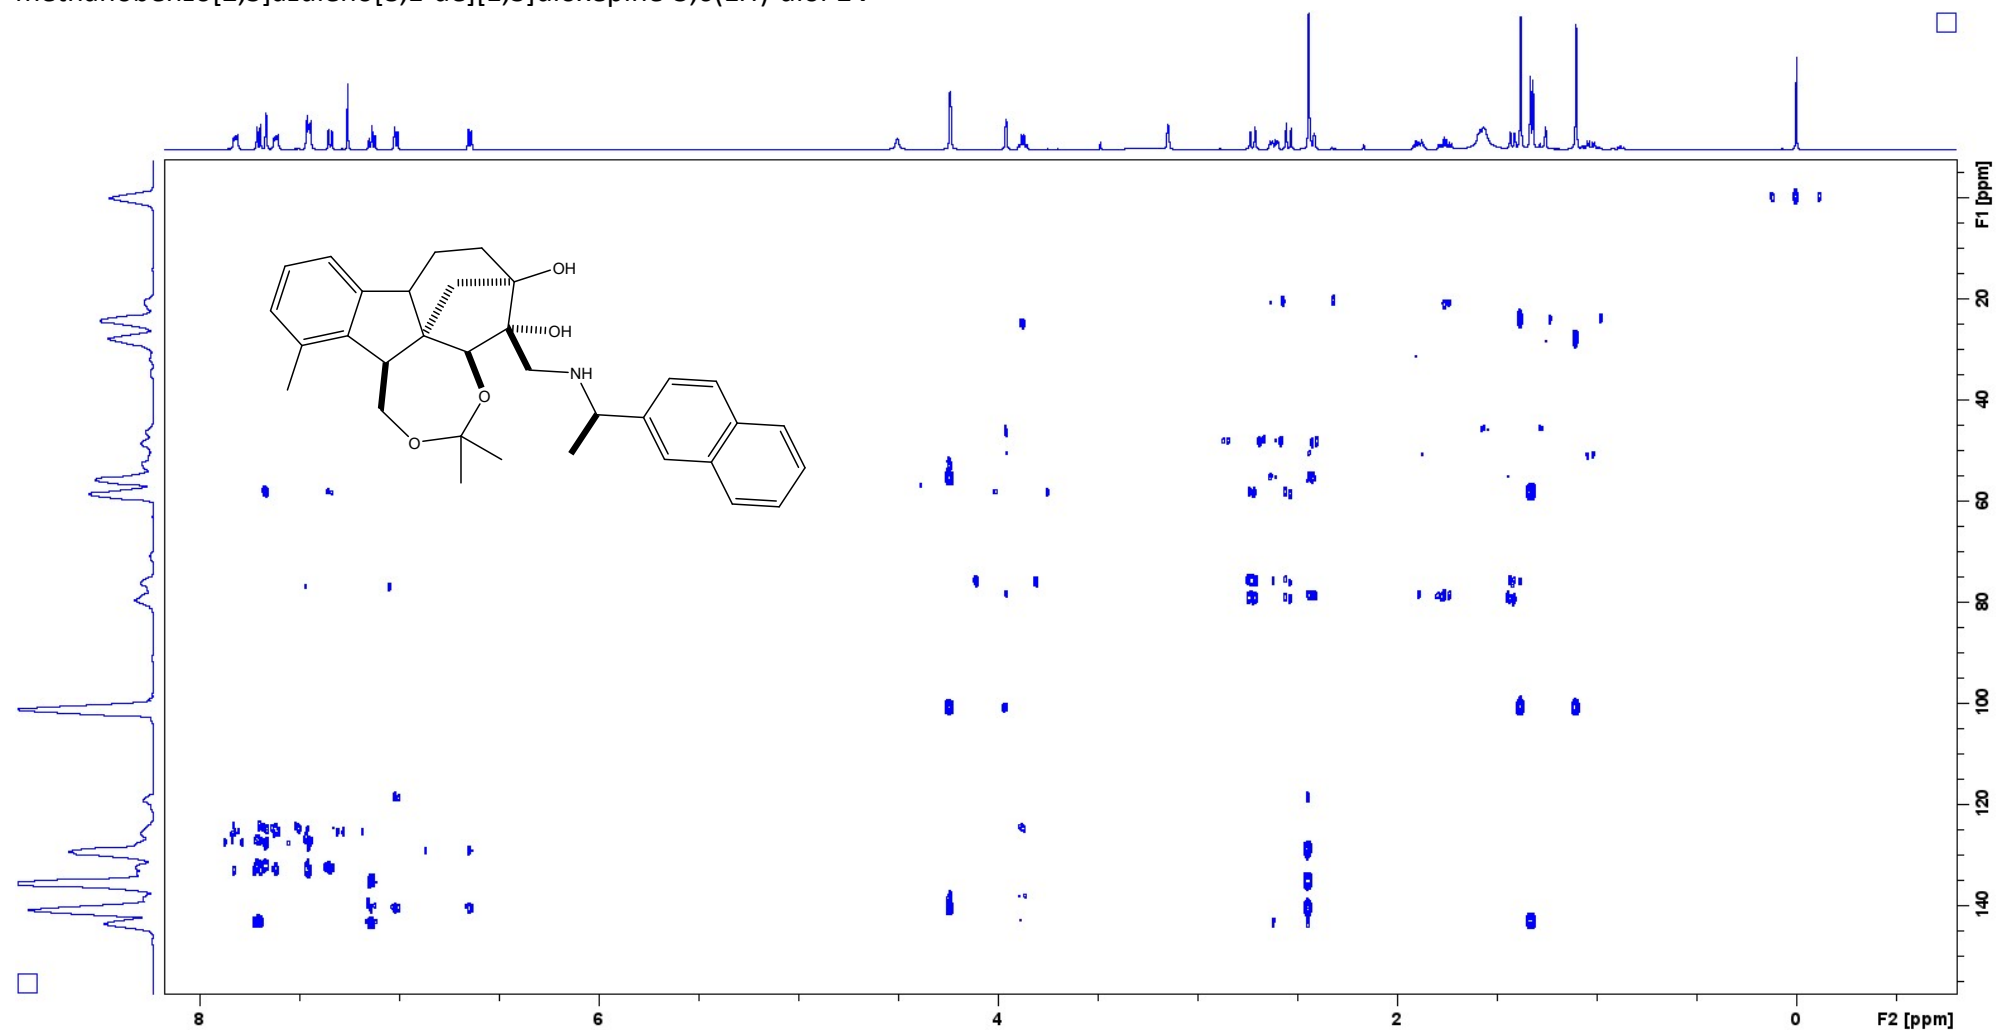

<sup>1</sup>H-NMR (500 MHz) of (4a*S*,4a<sup>1</sup>*R*,5*R*,6*S*,12*bS*)-3,3,12-Trimethyl-5-(((*S*)-1-(naphthalen-1-yl)ethyl)amino)methyl)-4a,5,7,8,8a,12*b*-hexahydro-4a<sup>1</sup>,6-methanobenzo[2,3]azuleno[8,1-*de*][1,3]dioxepine-5,6(1*H*)-diol **15**

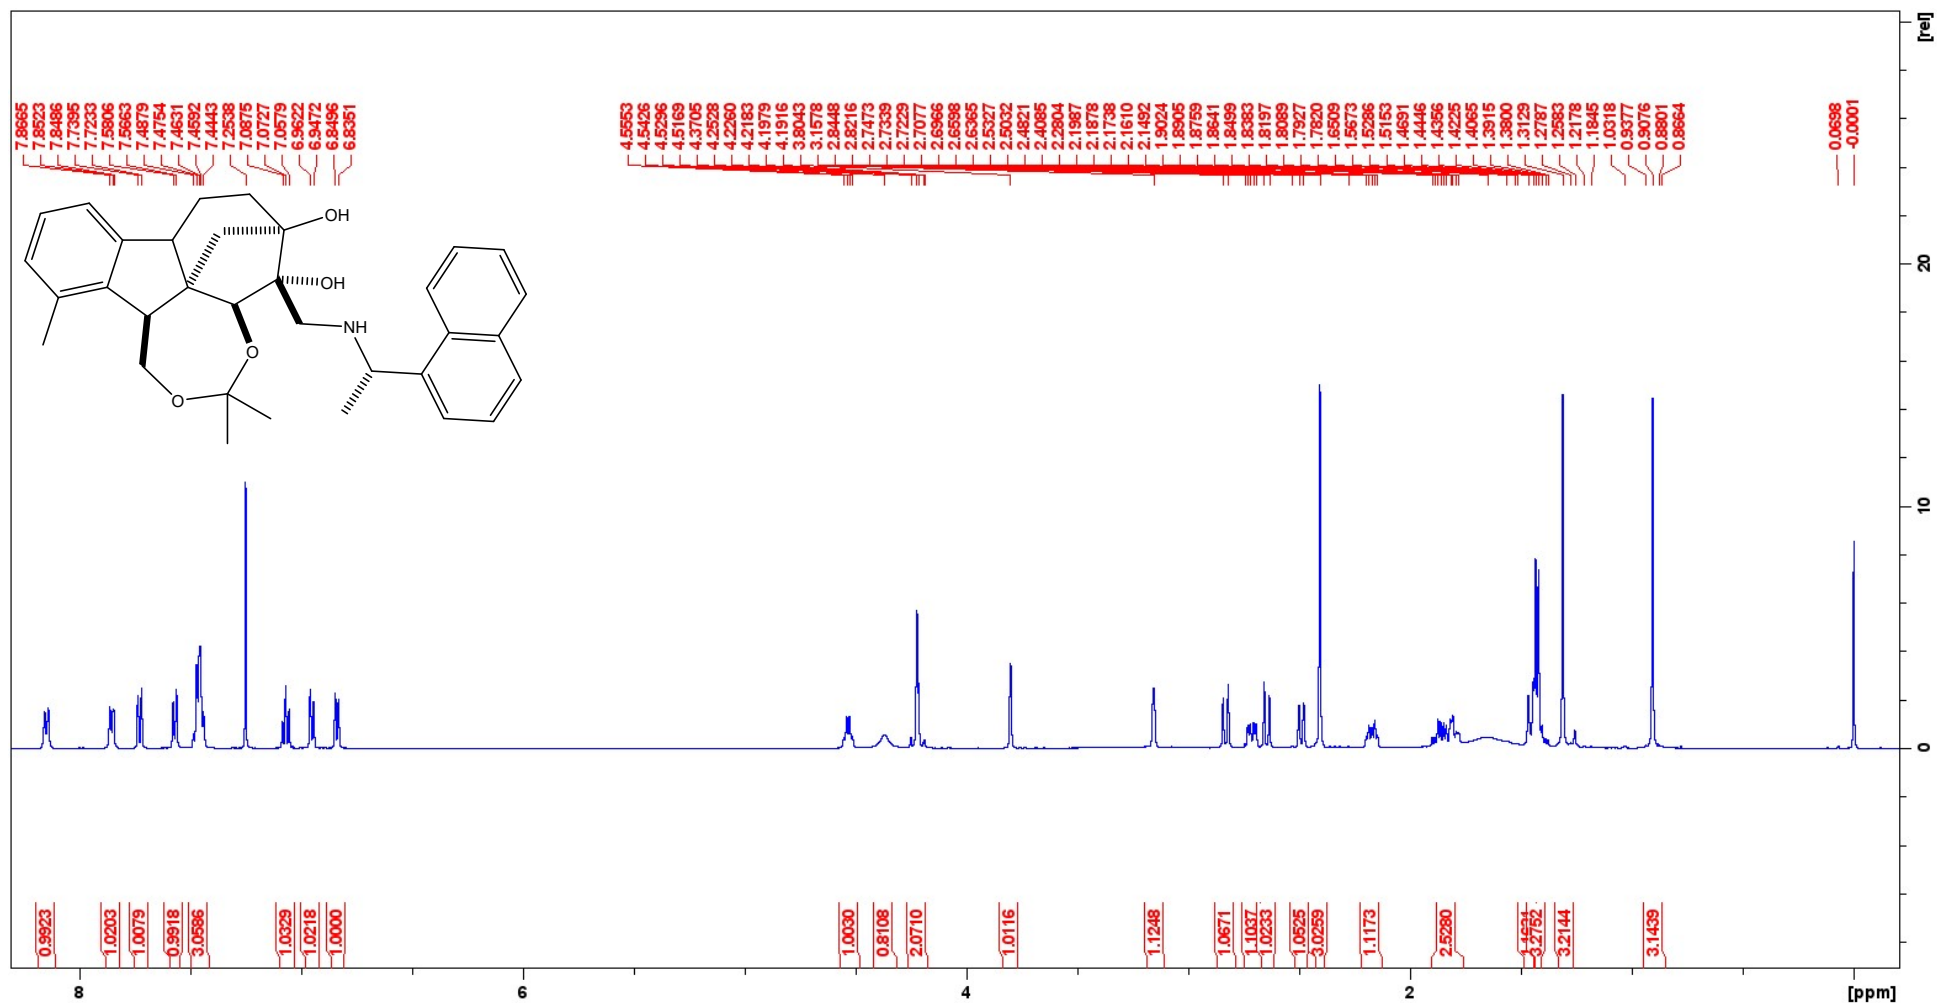

$^{13}\text{C}\{^1\text{H}\}$  J-MOD NMR (125 MHz) of (4a*S*,4a<sup>1</sup>*R*,5*R*,6*S*,12*bS*)-3,3,12-Trimethyl-5-(((*S*)-1-(naphthalen-1-yl)ethyl)amino)methyl)-4a,5,7,8,8a,12b-hexahydro-4a<sup>1</sup>,6-methanobenzo[2,3]azuleno[8,1-de][1,3]dioxepine-5,6(1*H*)-diol **15**

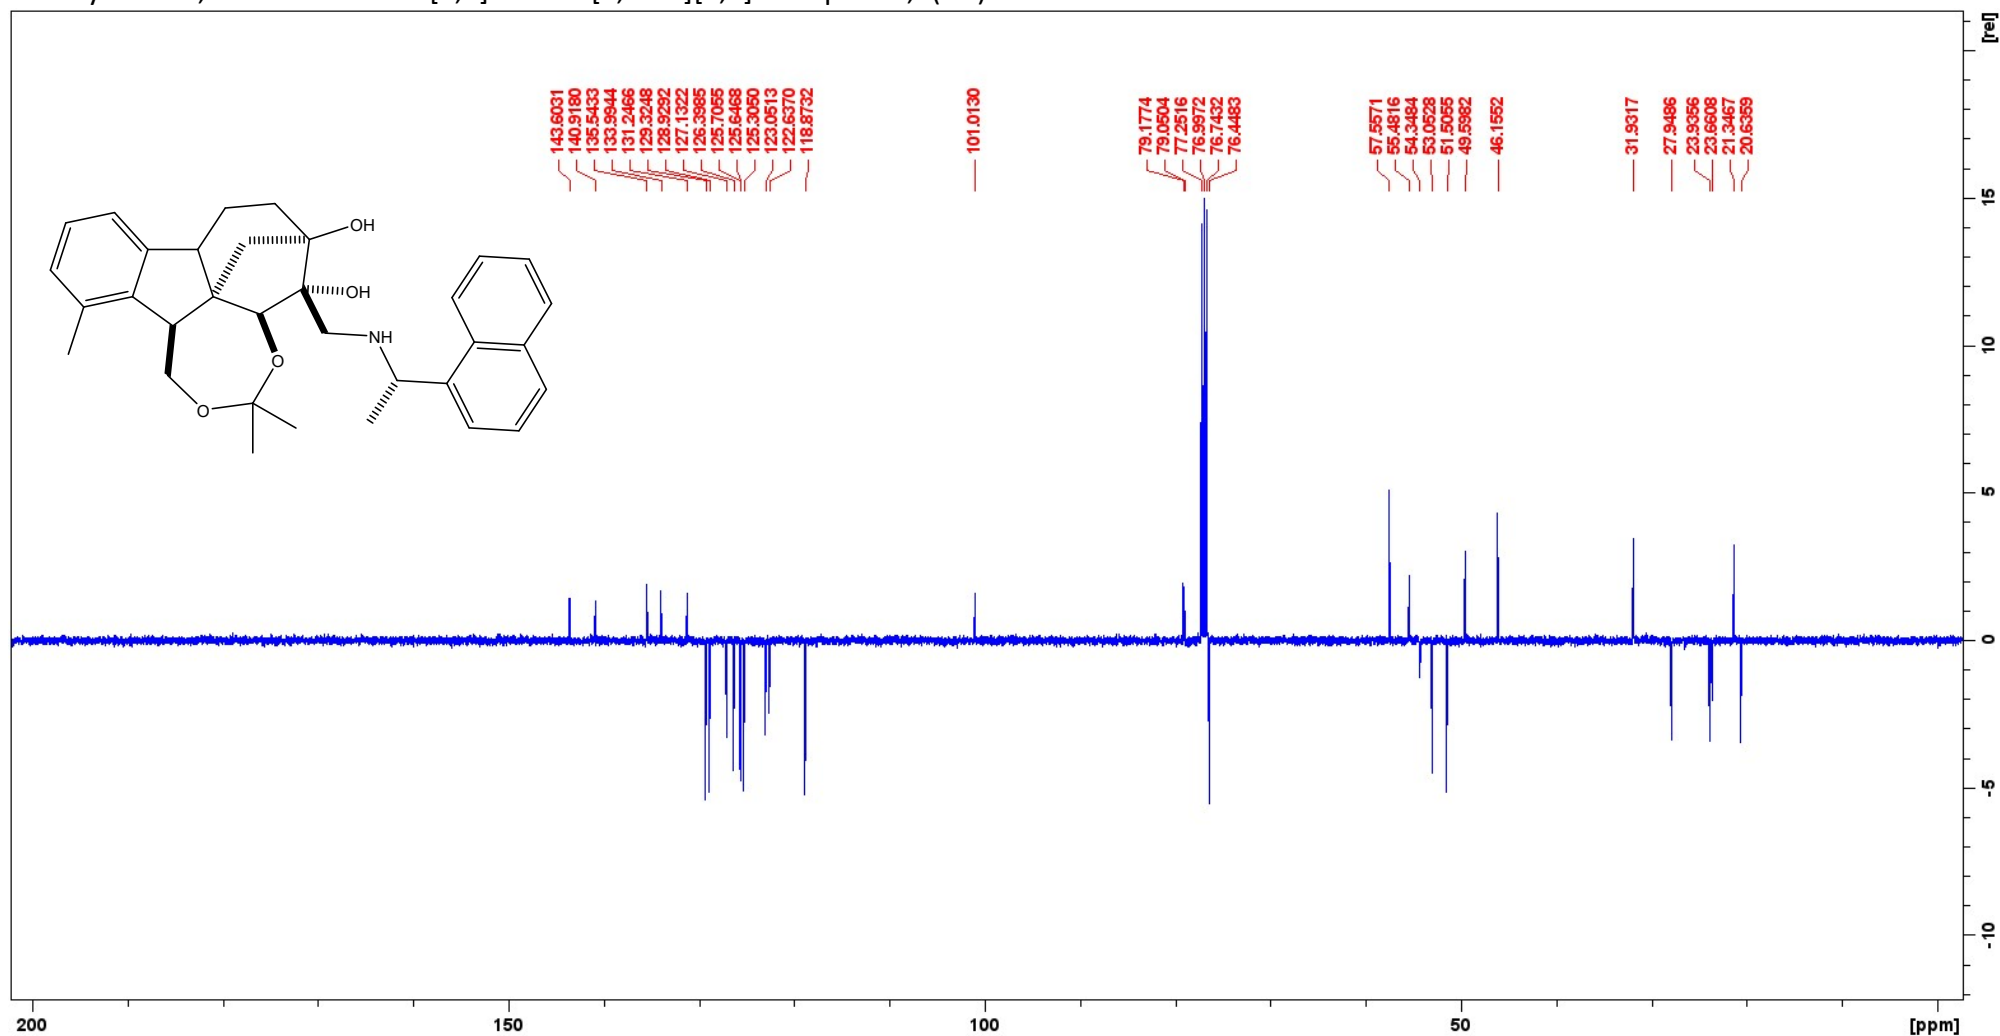

COSY of (4a*S*,4a<sup>1</sup>*R*,5*R*,6*S*,12*bS*)-3,3,12-Trimethyl-5-(((*S*)-1-(naphthalen-1-yl)ethyl)amino)methyl)-4a,5,7,8,8a,12*b*-hexahydro-4a<sup>1</sup>,6-methanobenzo[2,3]azuleno[8,1-*de*][1,3]dioxepine-5,6(1*H*)-diol **15**

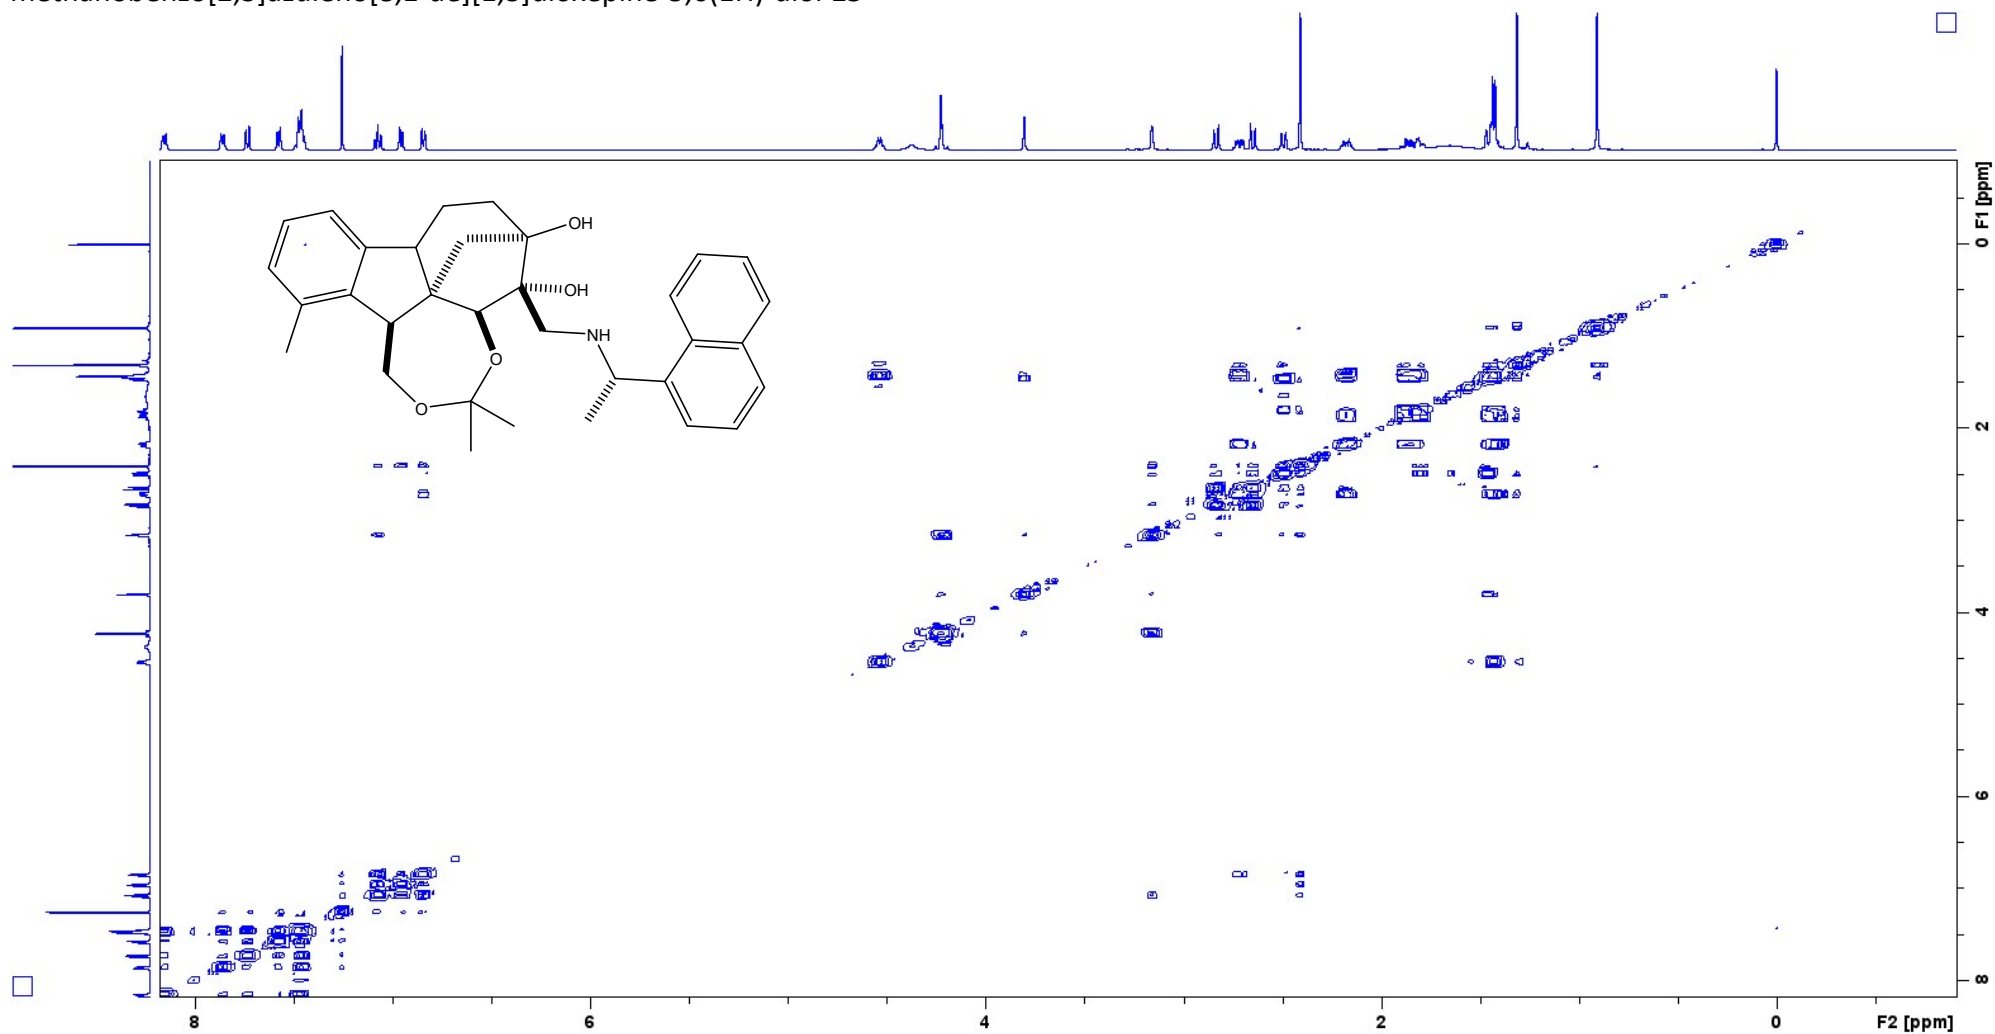

NOESY of (4a*S*,4a<sup>1</sup>*R*,5*R*,6*S*,12*bS*)-3,3,12-Trimethyl-5-(((*S*)-1-(naphthalen-1-yl)ethyl)amino)methyl)-4a,5,7,8,8a,12*b*-hexahydro-4a<sup>1</sup>,6-methanobenzo[2,3]azuleno[8,1-*de*][1,3]dioxepine-5,6(1*H*)-diol **15**

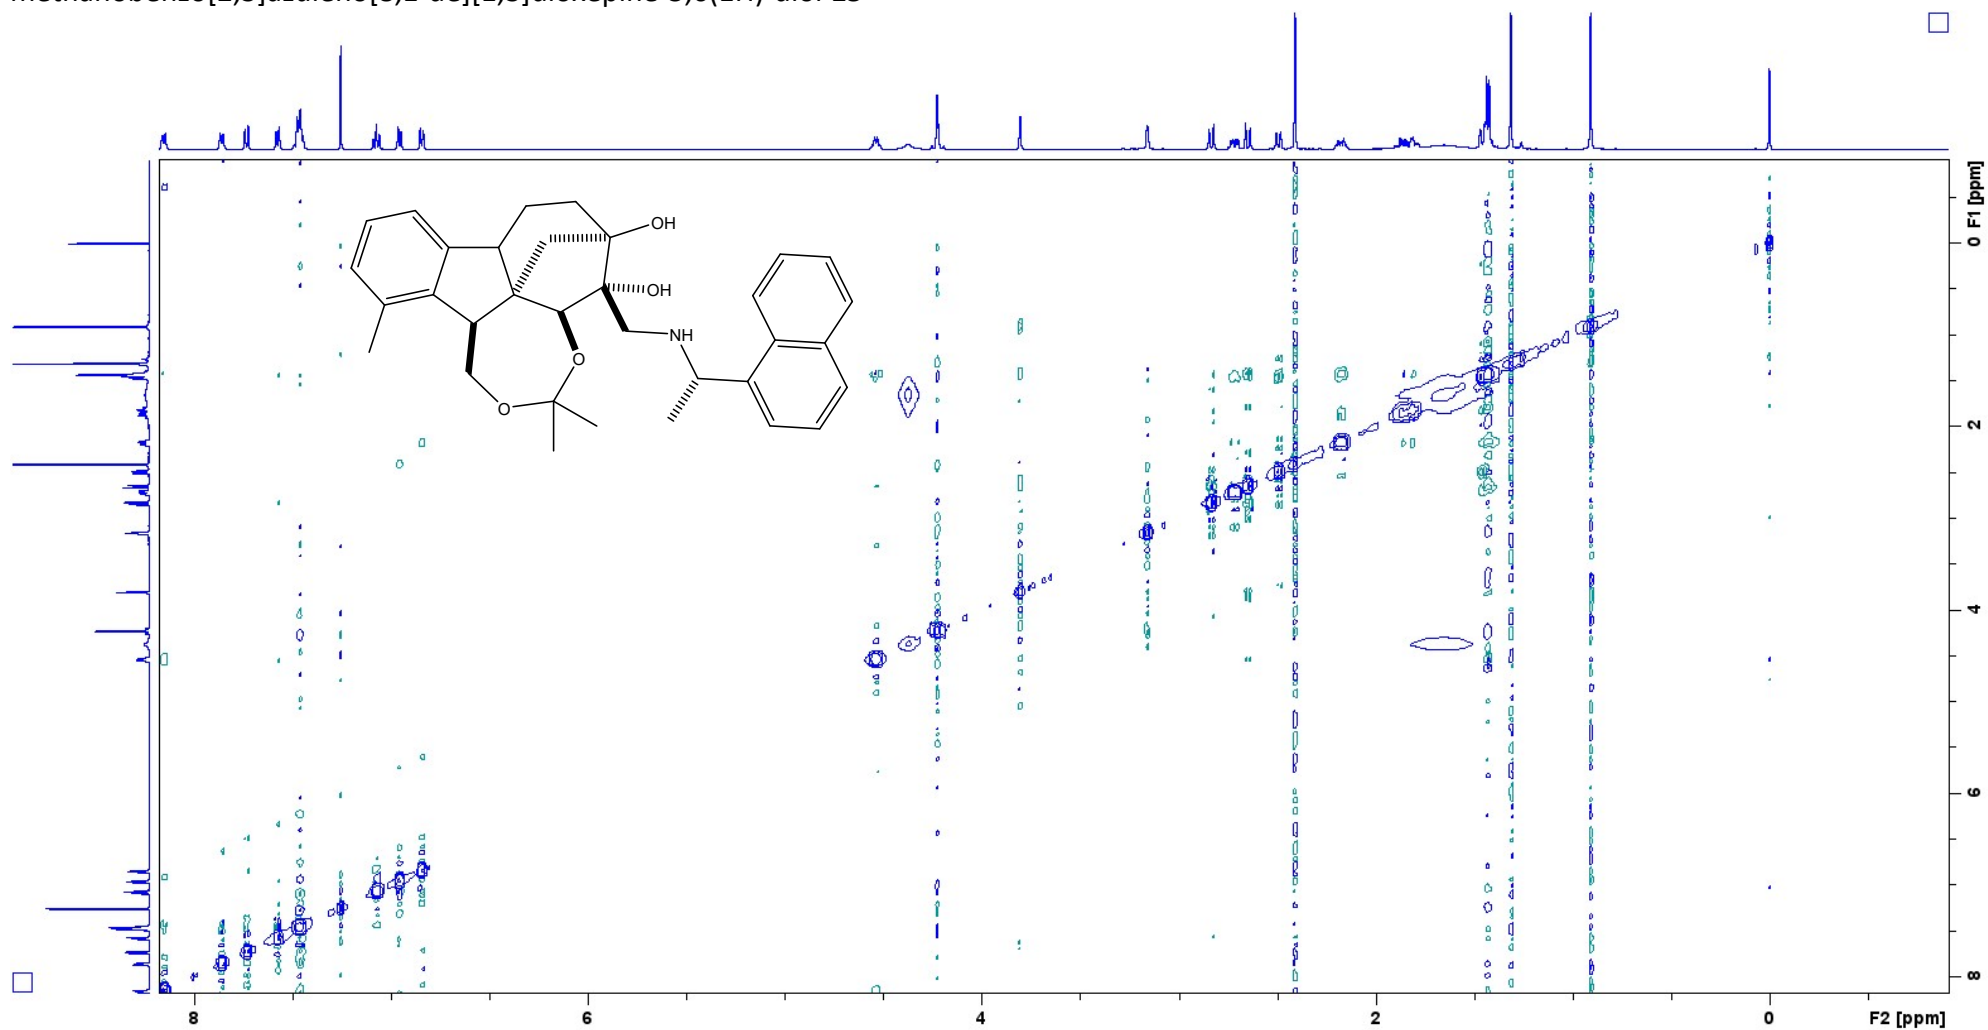

HSQC of (4*a*S,4*a*<sup>1</sup>*R*,5*R*,6*S*,12*b**S*)-3,3,12-Trimethyl-5-(((*S*)-1-(naphthalen-1-yl)ethyl)amino)methyl)-4*a*,5,7,8,8*a*,12*b*-hexahydro-4*a*<sup>1</sup>,6-methanobenzo[2,3]azuleno[8,1-*de*][1,3]dioxepine-5,6(1*H*)-diol **15**

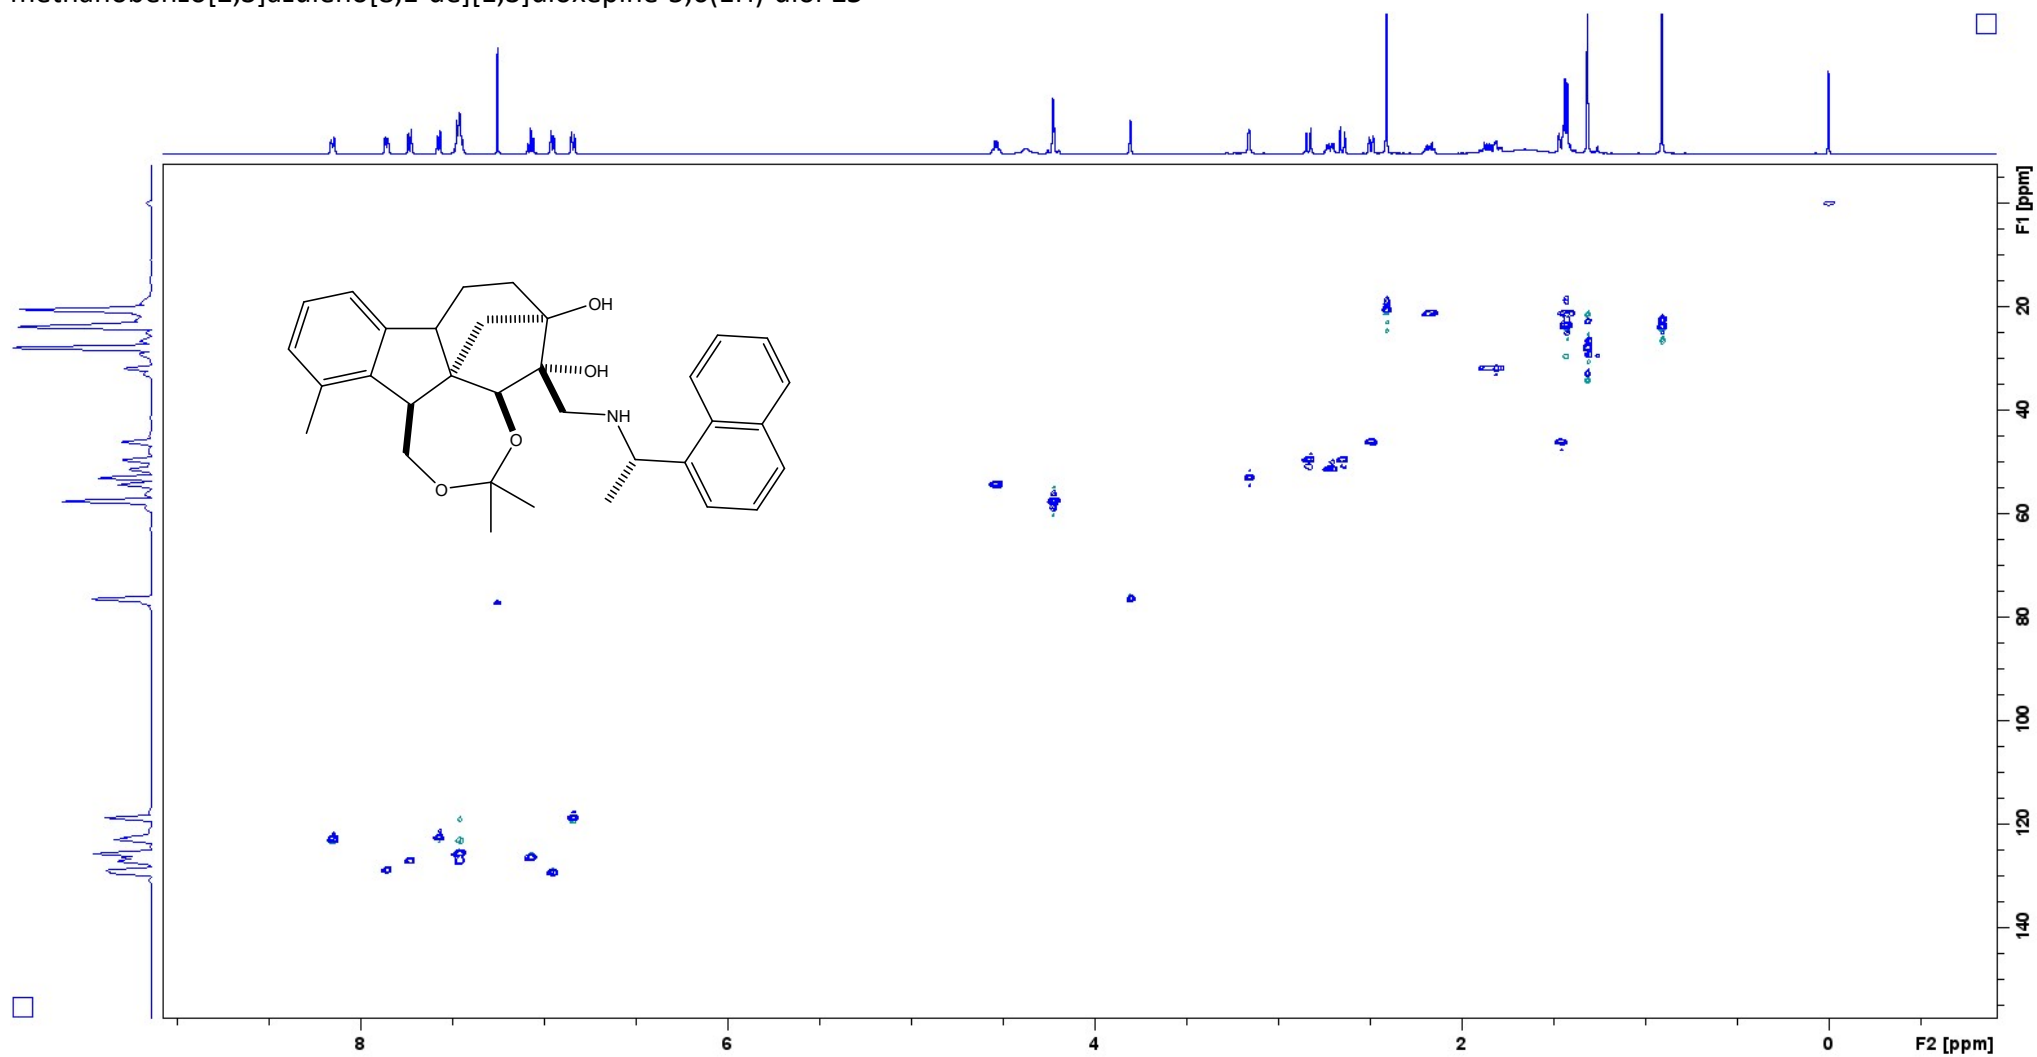



HMBC of (4*S*,4*a*<sup>1</sup>*R*,5*R*,6*S*,12*b**S*)-3,3,12-Trimethyl-5-(((*S*)-1-(naphthalen-1-yl)ethyl)amino)methyl)-4*a*,5,7,8,8*a*,12*b*-hexahydro-4*a*<sup>1</sup>,6-methanobenzo[2,3]azuleno[8,1-*de*][1,3]dioxepine-5,6(1*H*)-diol **15**

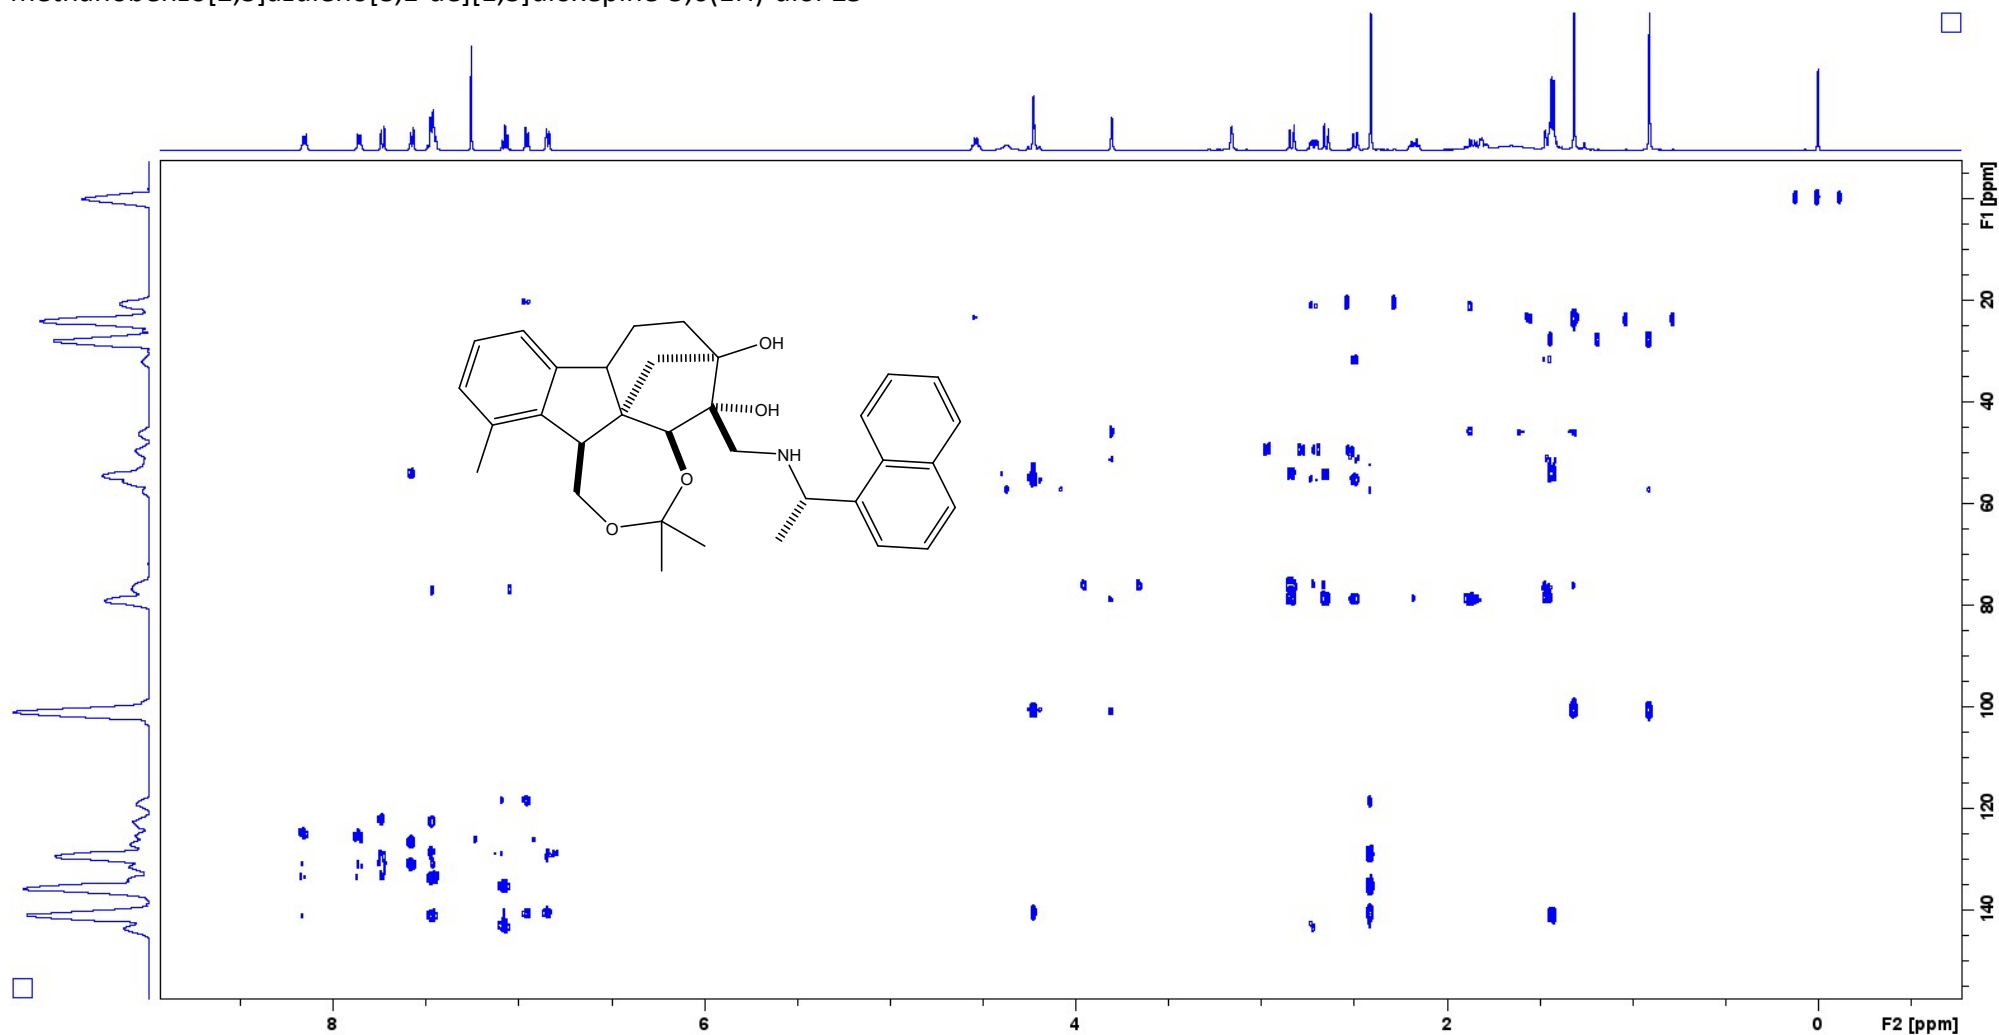

$^1\text{H-NMR}$  (500 MHz) of (4a*S*,4a<sup>1</sup>*R*,5*R*,6*S*,12b*S*)-3,3,12-Trimethyl-5-(((*R*)-1-(naphthalen-1-yl)ethyl)amino)methyl)-4a,5,7,8,8a,12b-hexahydro-4a<sup>1</sup>,6-methanobenzo[2,3]azuleno[8,1-de][1,3]dioxepine-5,6(1*H*)-diol **16**

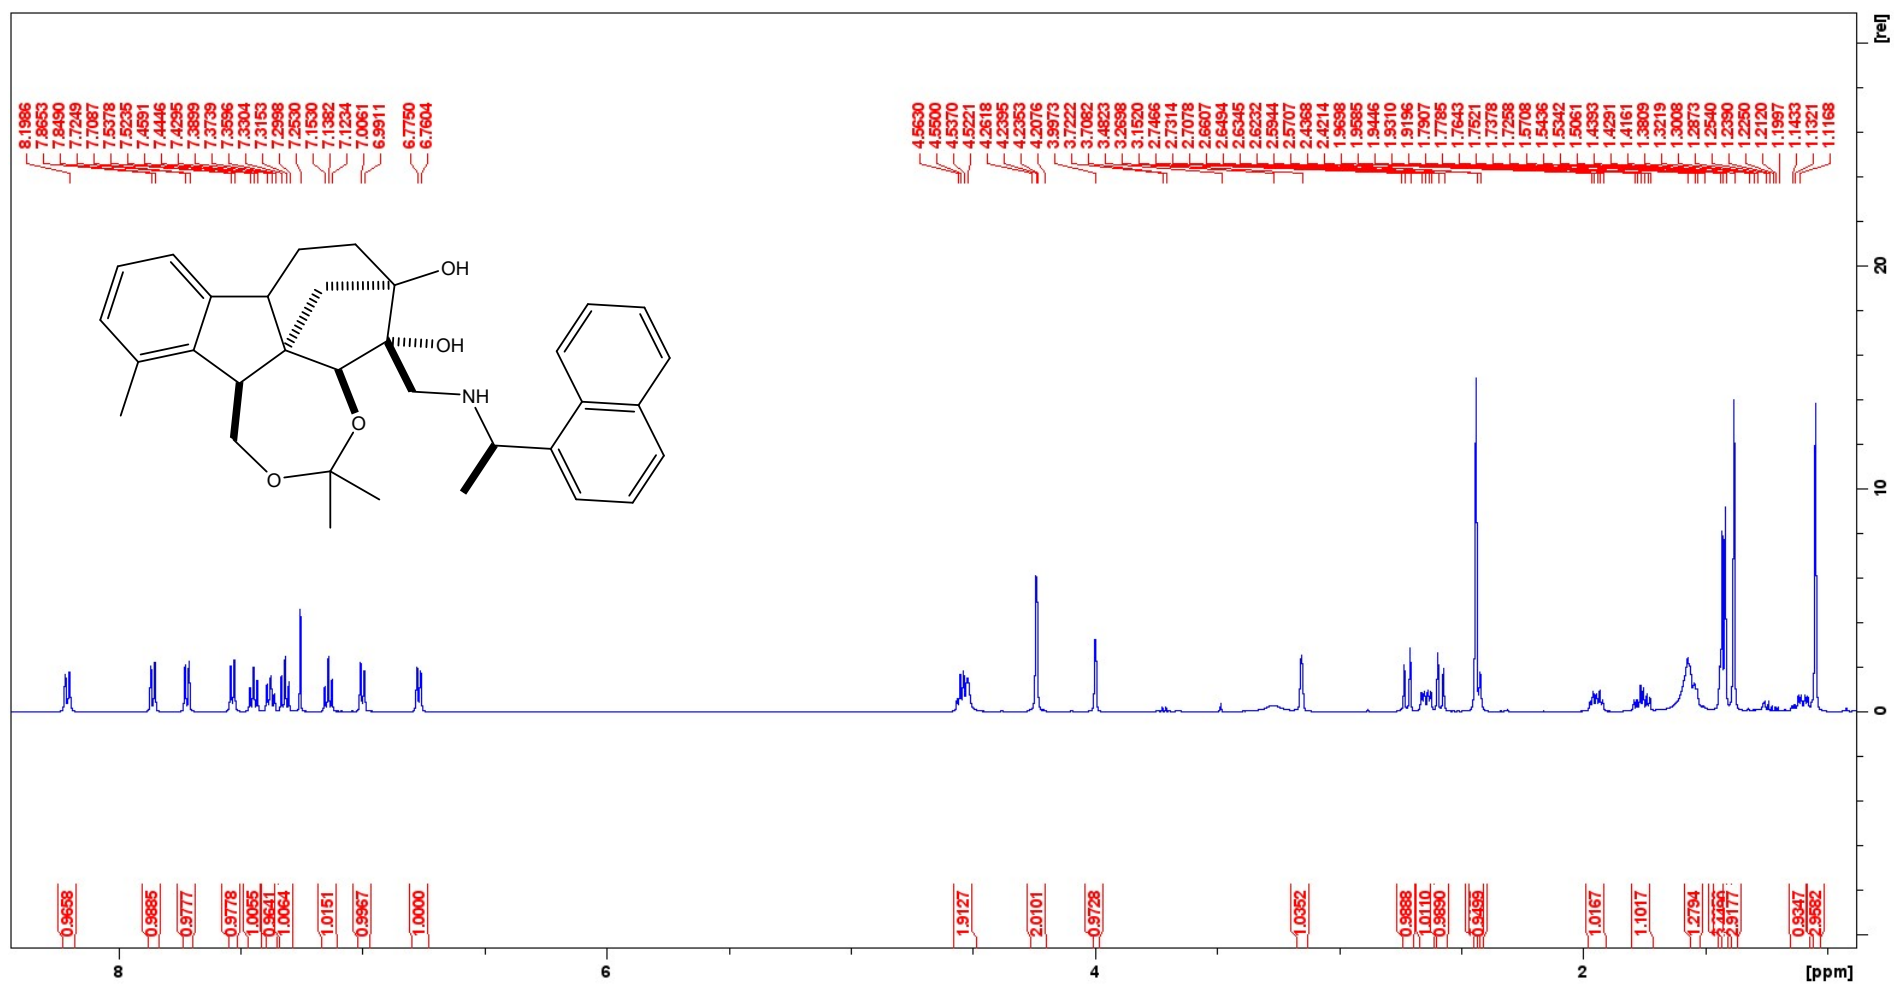

$^{13}\text{C}\{^1\text{H}\}$  J-MOD NMR (125 MHz) of (4*a*S,4*a*<sup>1</sup>*R*,5*R*,6*S*,12*b*S)-3,3,12-Trimethyl-5-(((*R*)-1-(naphthalen-1-yl)ethyl)amino)methyl)-4*a*,5,7,8,8*a*,12*b*-hexahydro-4*a*<sup>1</sup>,6-methanobenzo[2,3]azuleno[8,1-*de*][1,3]dioxepine-5,6(1*H*)-diol **16**

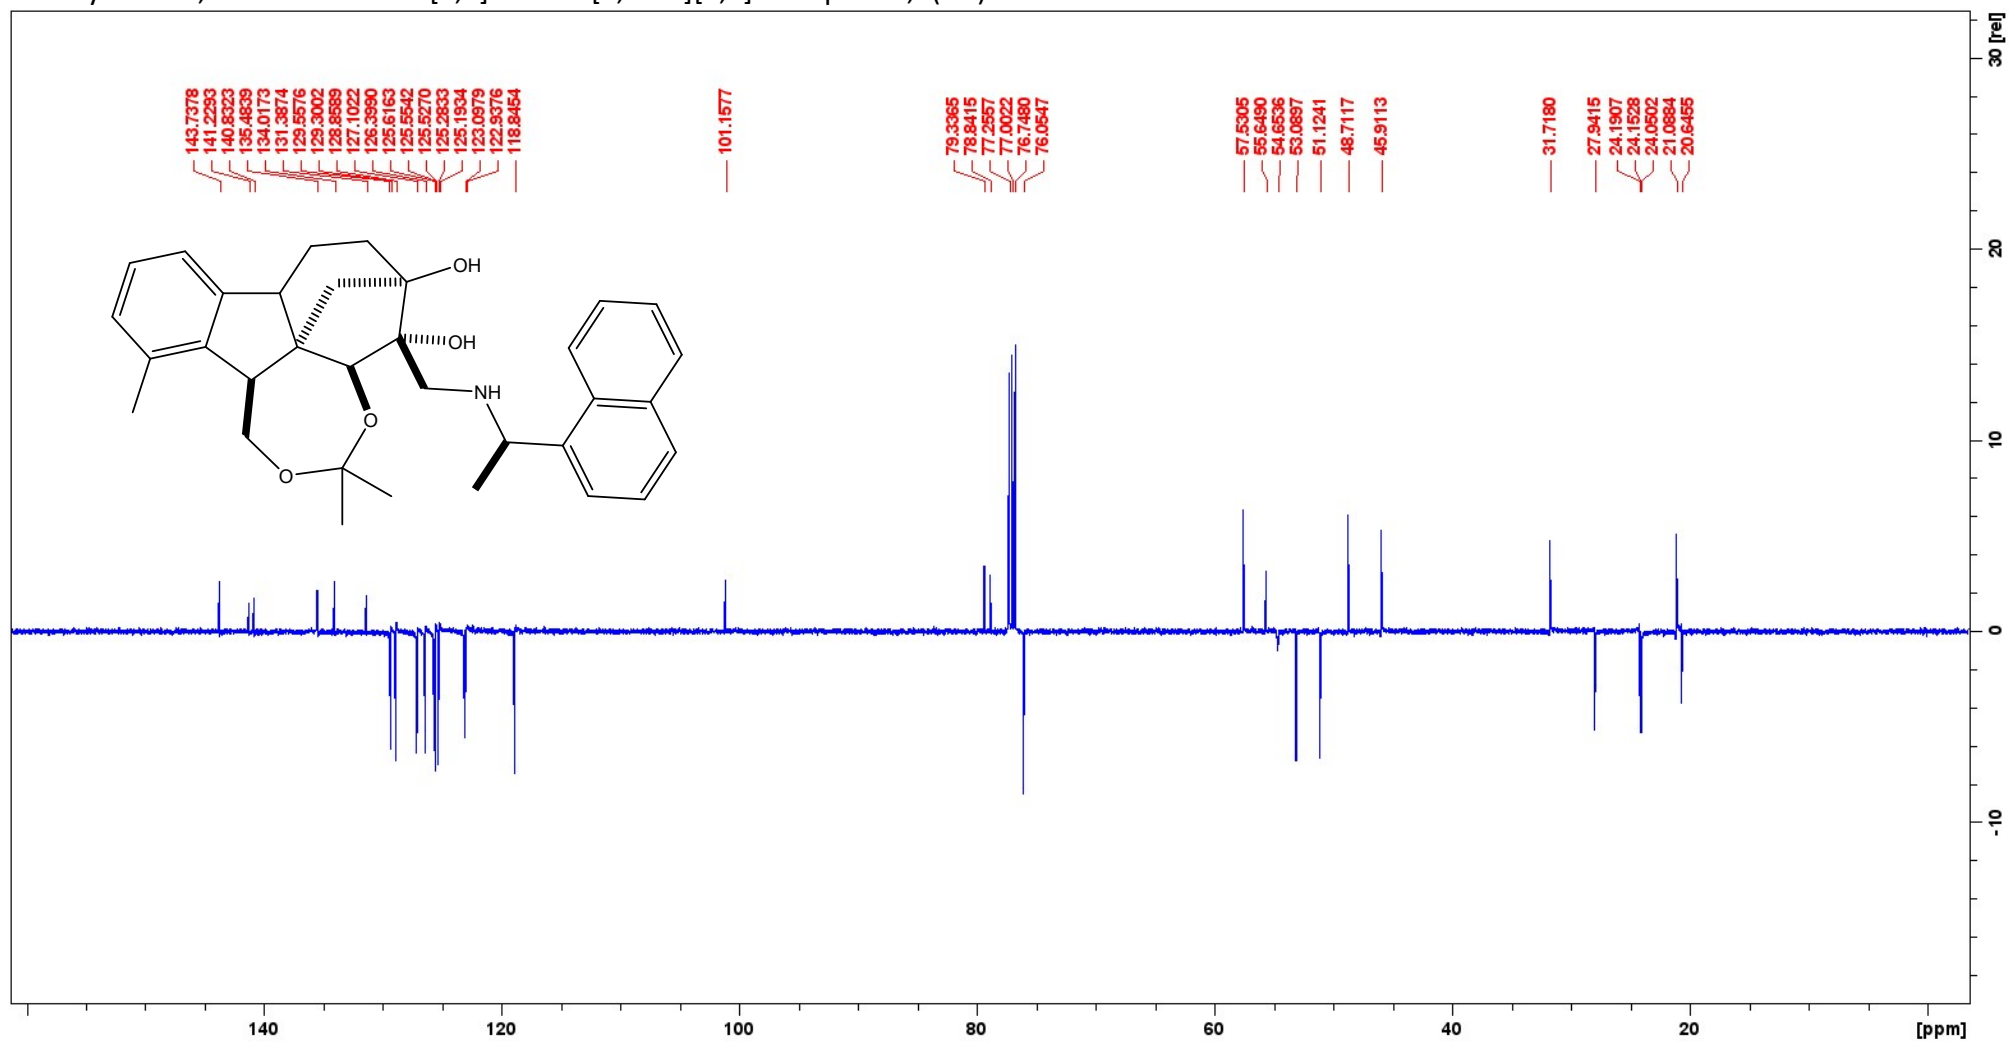

COSY of (4*a*S,4*a*<sup>1</sup>*R*,5*R*,6*S*,12*b**S*)-3,3,12-Trimethyl-5-(((*R*)-1-(naphthalen-1-yl)ethyl)amino)methyl)-4*a*,5,7,8,8*a*,12*b*-hexahydro-4*a*<sup>1</sup>,6-methanobenzo[2,3]azuleno[8,1-*de*][1,3]dioxepine-5,6(1*H*)-diol **16**

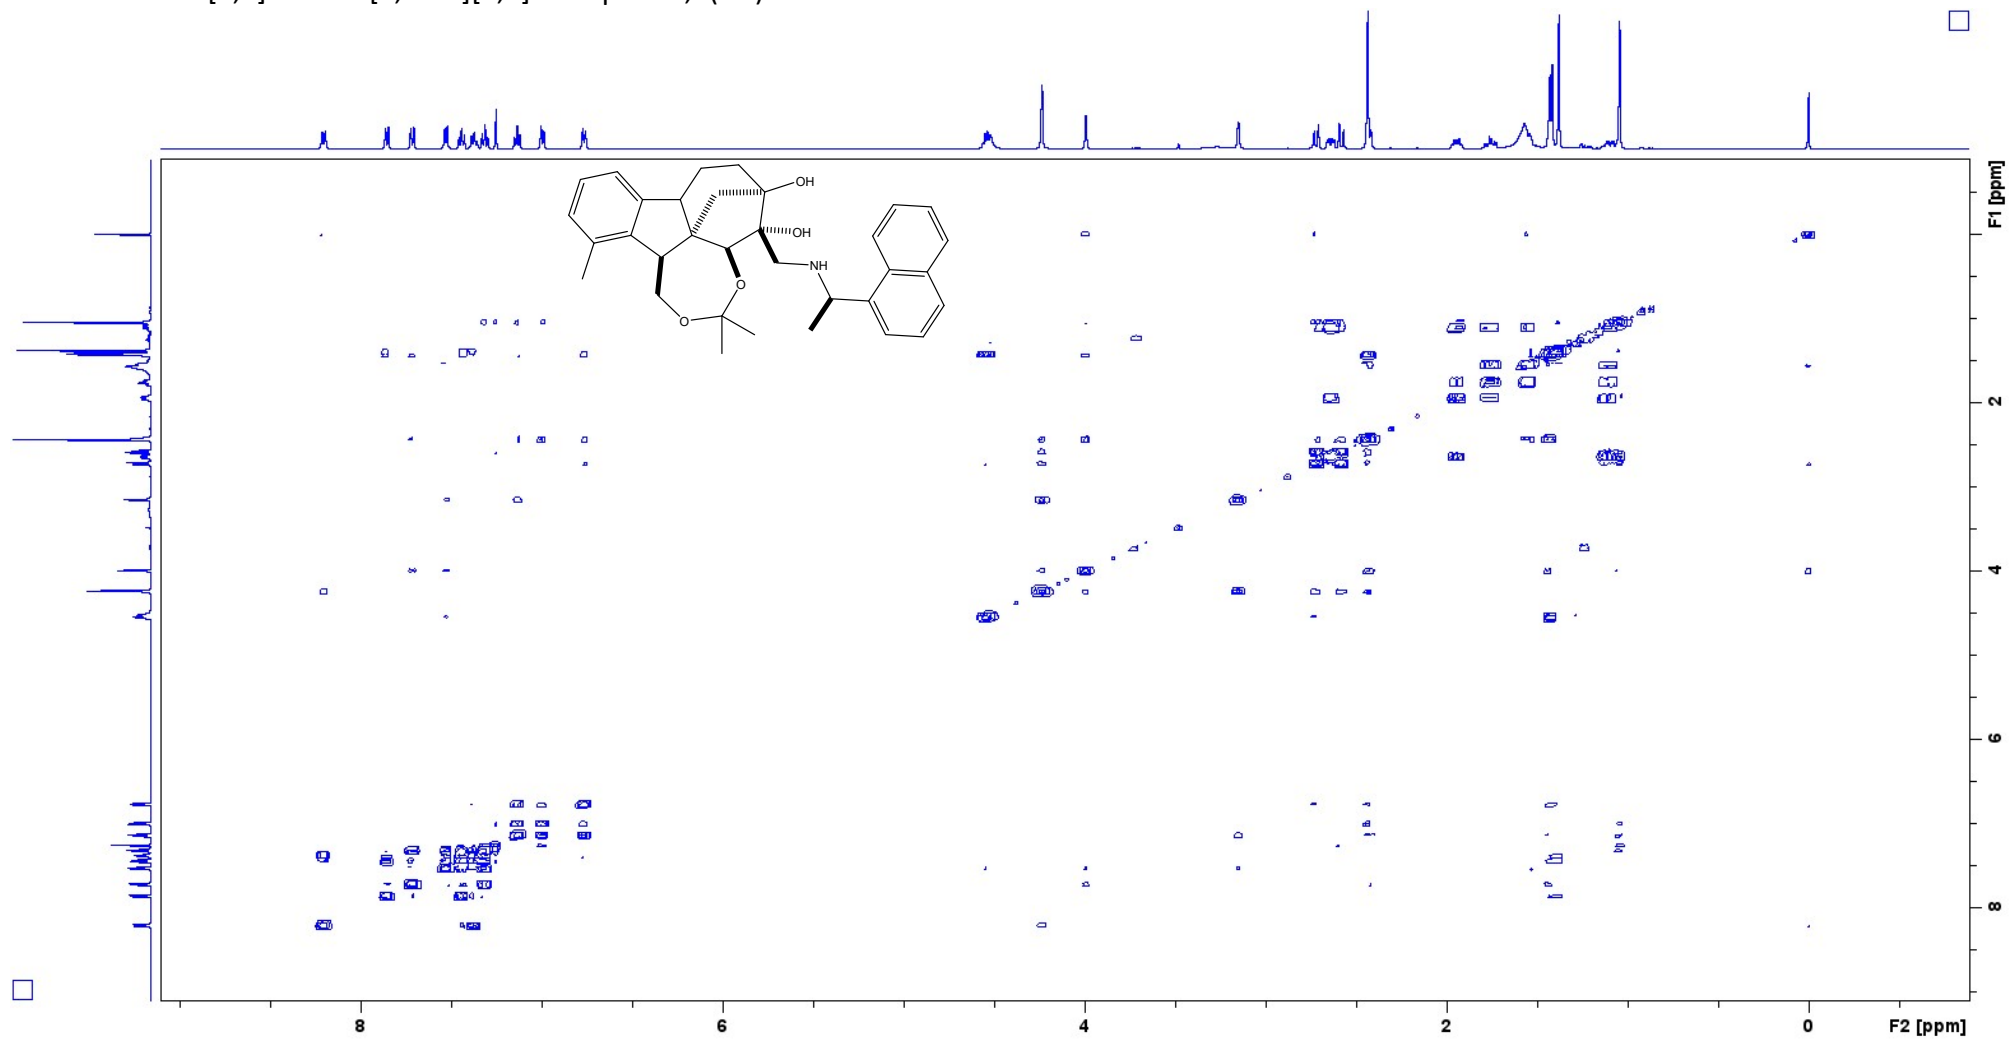

NOESY of (4a*S*,4a<sup>1</sup>*R*,5*R*,6*S*,12*bS*)-3,3,12-Trimethyl-5-(((*R*)-1-(naphthalen-1-yl)ethyl)amino)methyl)-4a,5,7,8,8a,12*b*-hexahydro-4a<sup>1</sup>,6-methanobenzo[2,3]azuleno[8,1-*de*][1,3]dioxepine-5,6(1*H*)-diol **16**

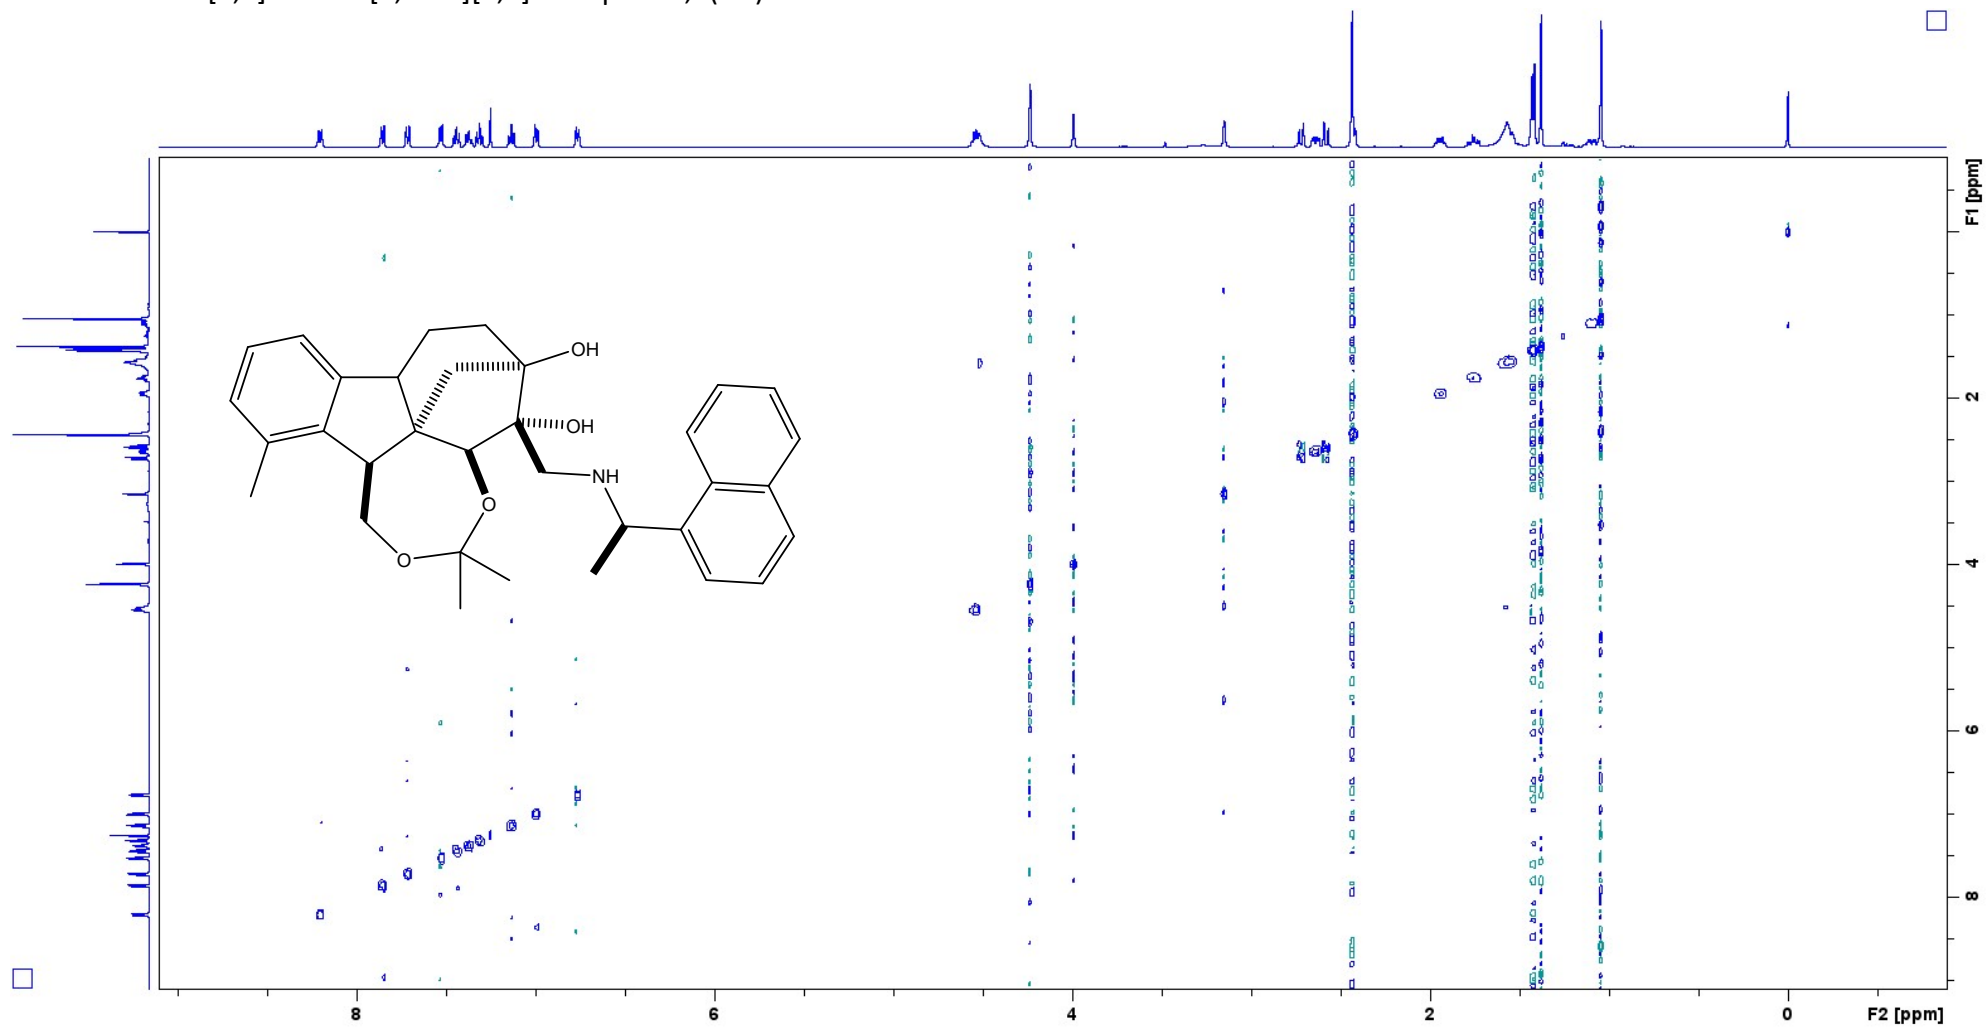

HSQC of (4*a*S,4*a*<sup>1</sup>*R*,5*R*,6*S*,12*b**S*)-3,3,12-Trimethyl-5-(((*R*)-1-(naphthalen-1-yl)ethyl)amino)methyl)-4*a*,5,7,8,8*a*,12*b*-hexahydro-4*a*<sup>1</sup>,6-methanobenzo[2,3]azuleno[8,1-*de*][1,3]dioxepine-5,6(1*H*)-diol **16**

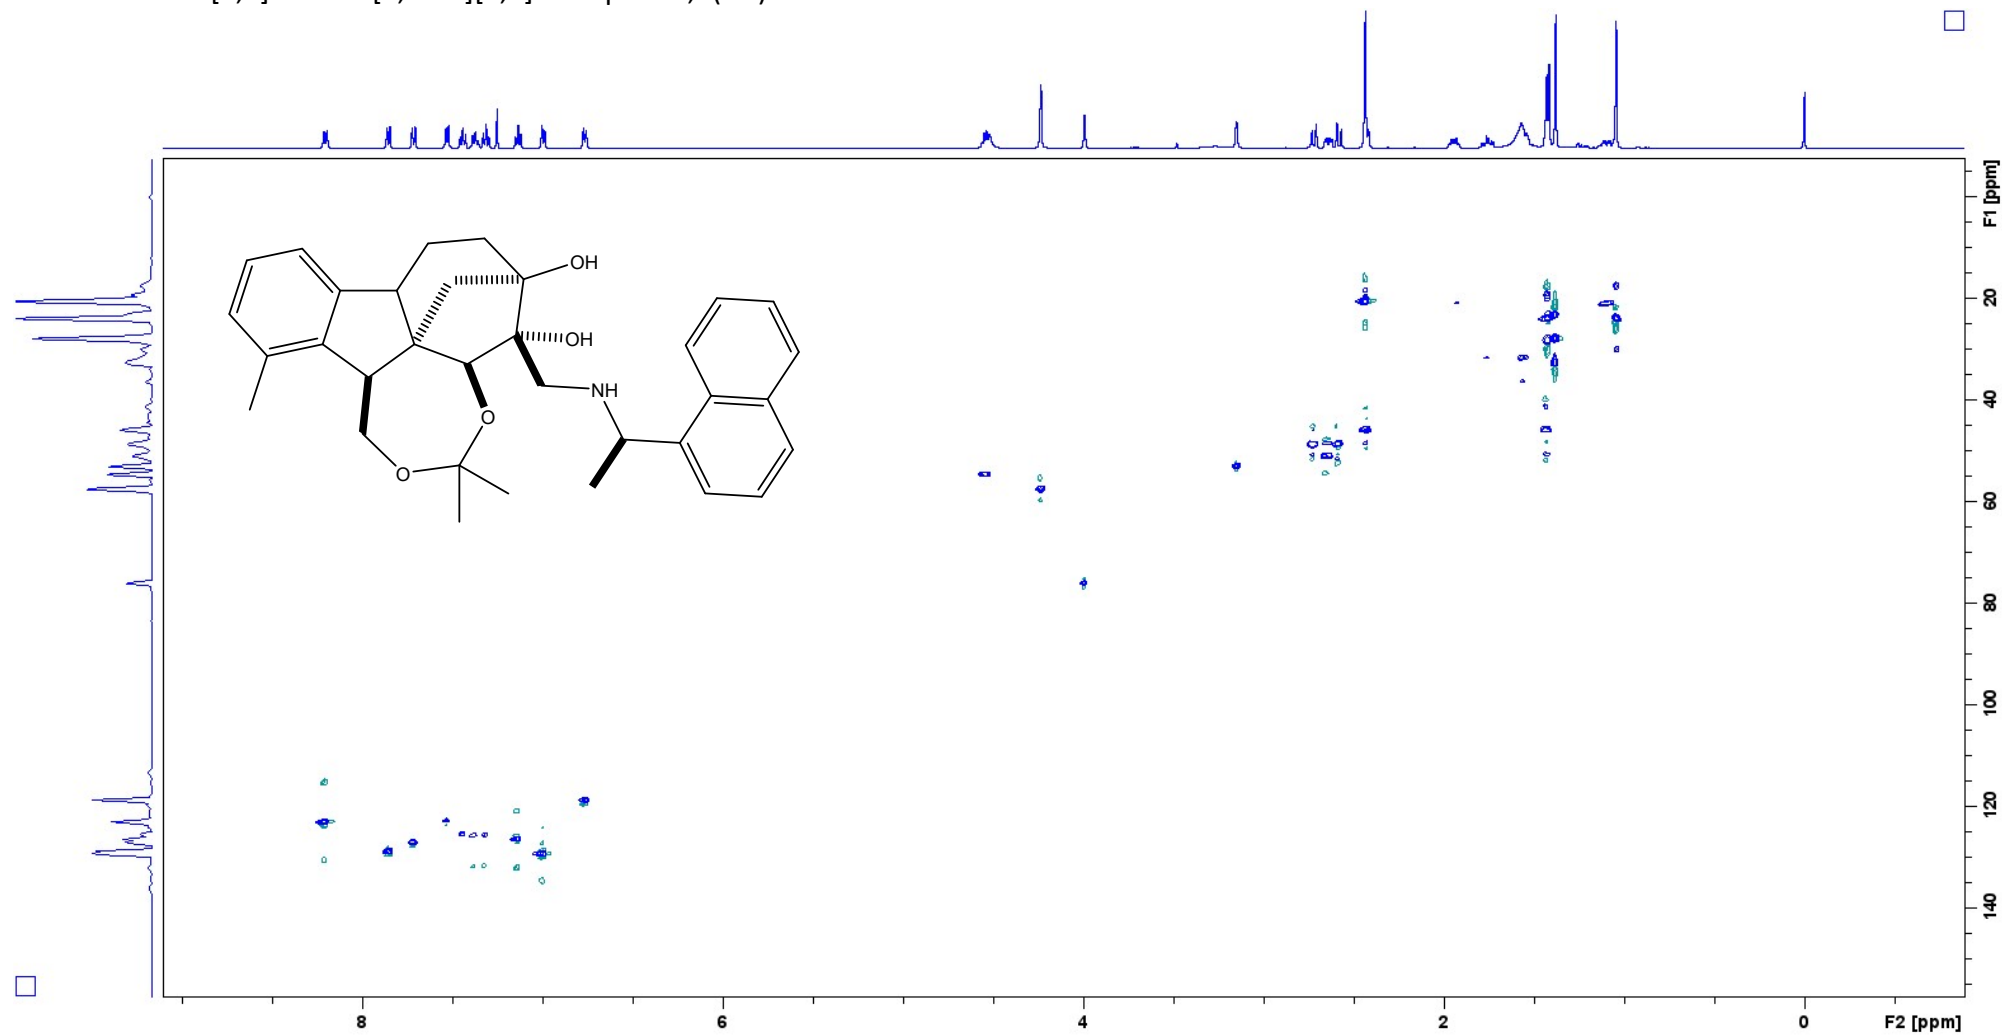

HMBC of (4a*S*,4a<sup>1</sup>*R*,5*R*,6*S*,12*bS*)-3,3,12-Trimethyl-5-(((*R*)-1-(naphthalen-1-yl)ethyl)amino)methyl)-4a,5,7,8,8a,12*b*-hexahydro-4a<sup>1</sup>,6-methanobenzo[2,3]azuleno[8,1-*de*][1,3]dioxepine-5,6(1*H*)-diol **16**

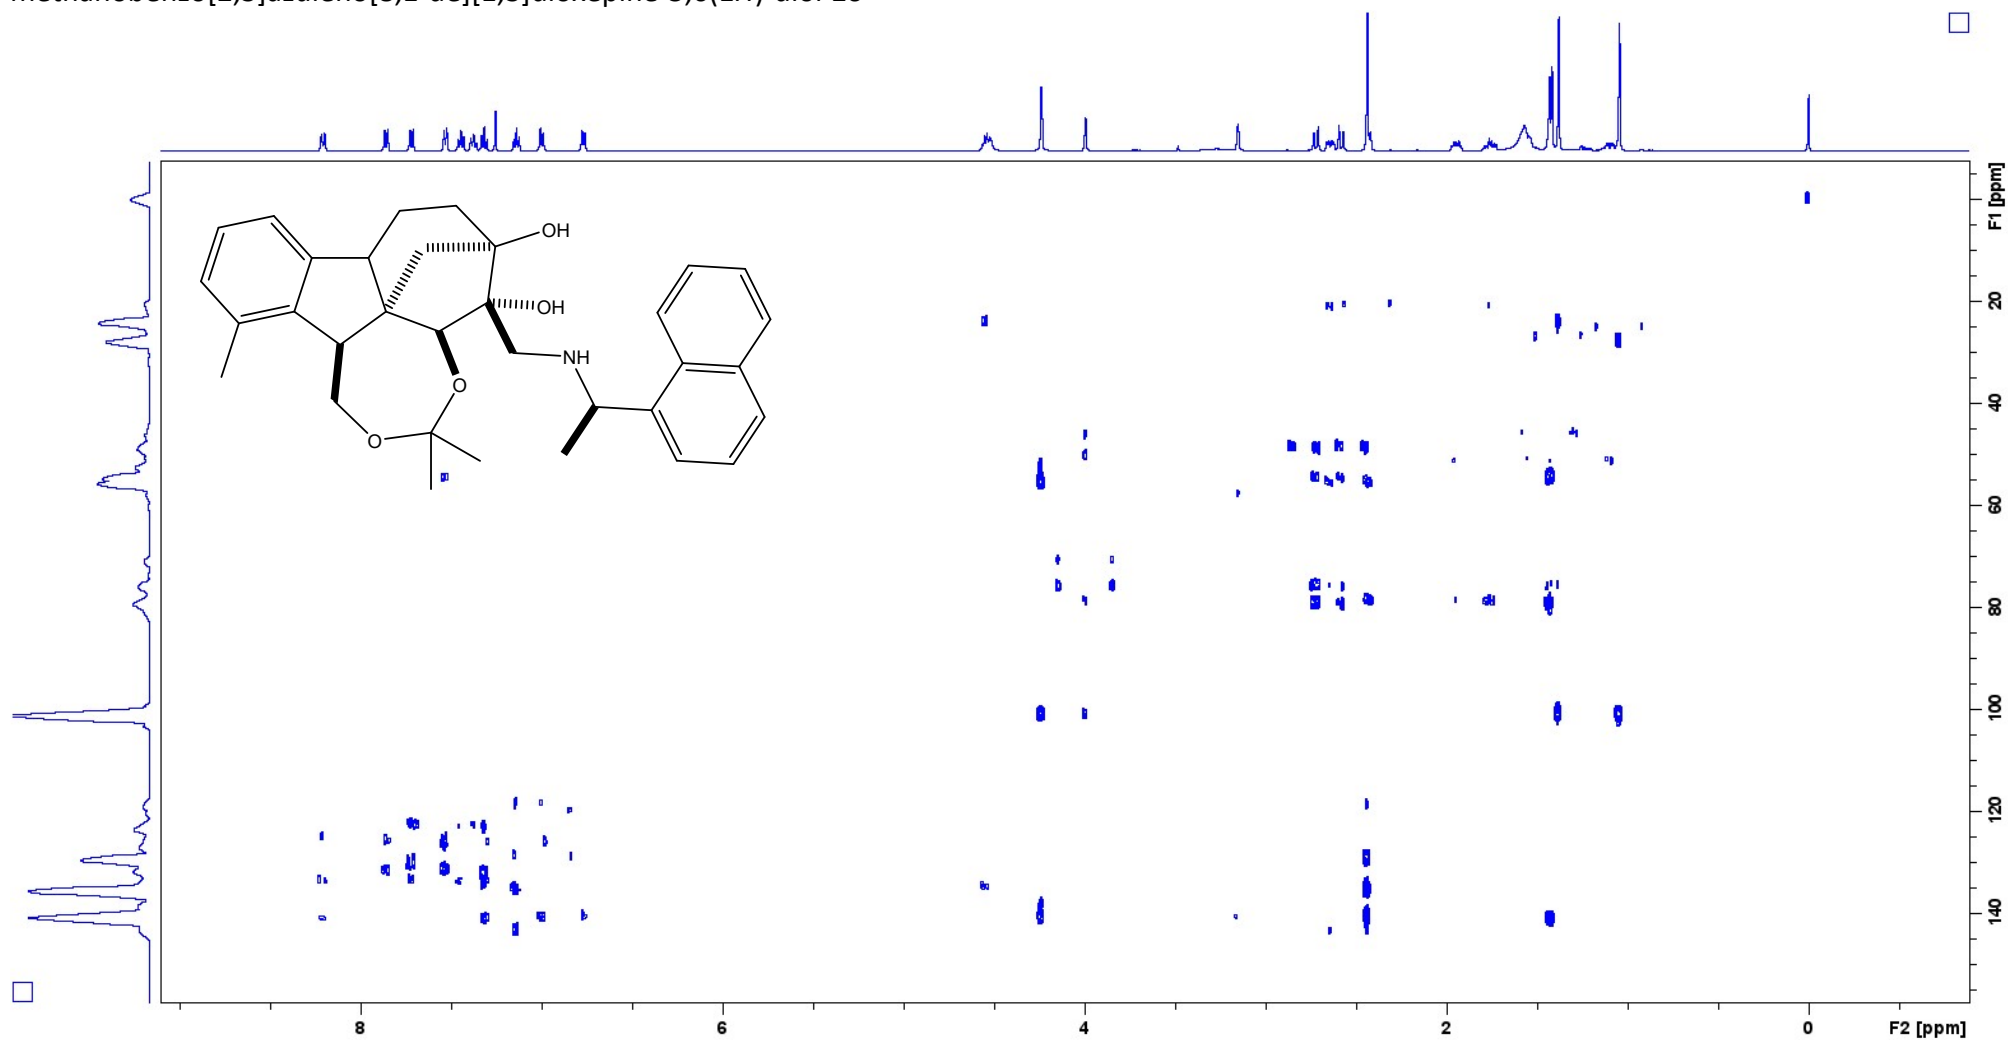

$^1\text{H-NMR}$  (500 MHz) of (4*a*S,4*a*<sup>1</sup>*R*,5*R*,6*S*,12*b**S*)-5-(((3-(1*H*-imidazol-1-yl)propyl)amino)methyl)-3,3,12-trimethyl-4*a*,5,7,8,8*a*,12*b*-hexahydro-4*a*<sup>1</sup>,6-methanobenzo[2,3]azuleno[8,1-*de*][1,3]dioxepine-5,6(1*H*)-diol **17**

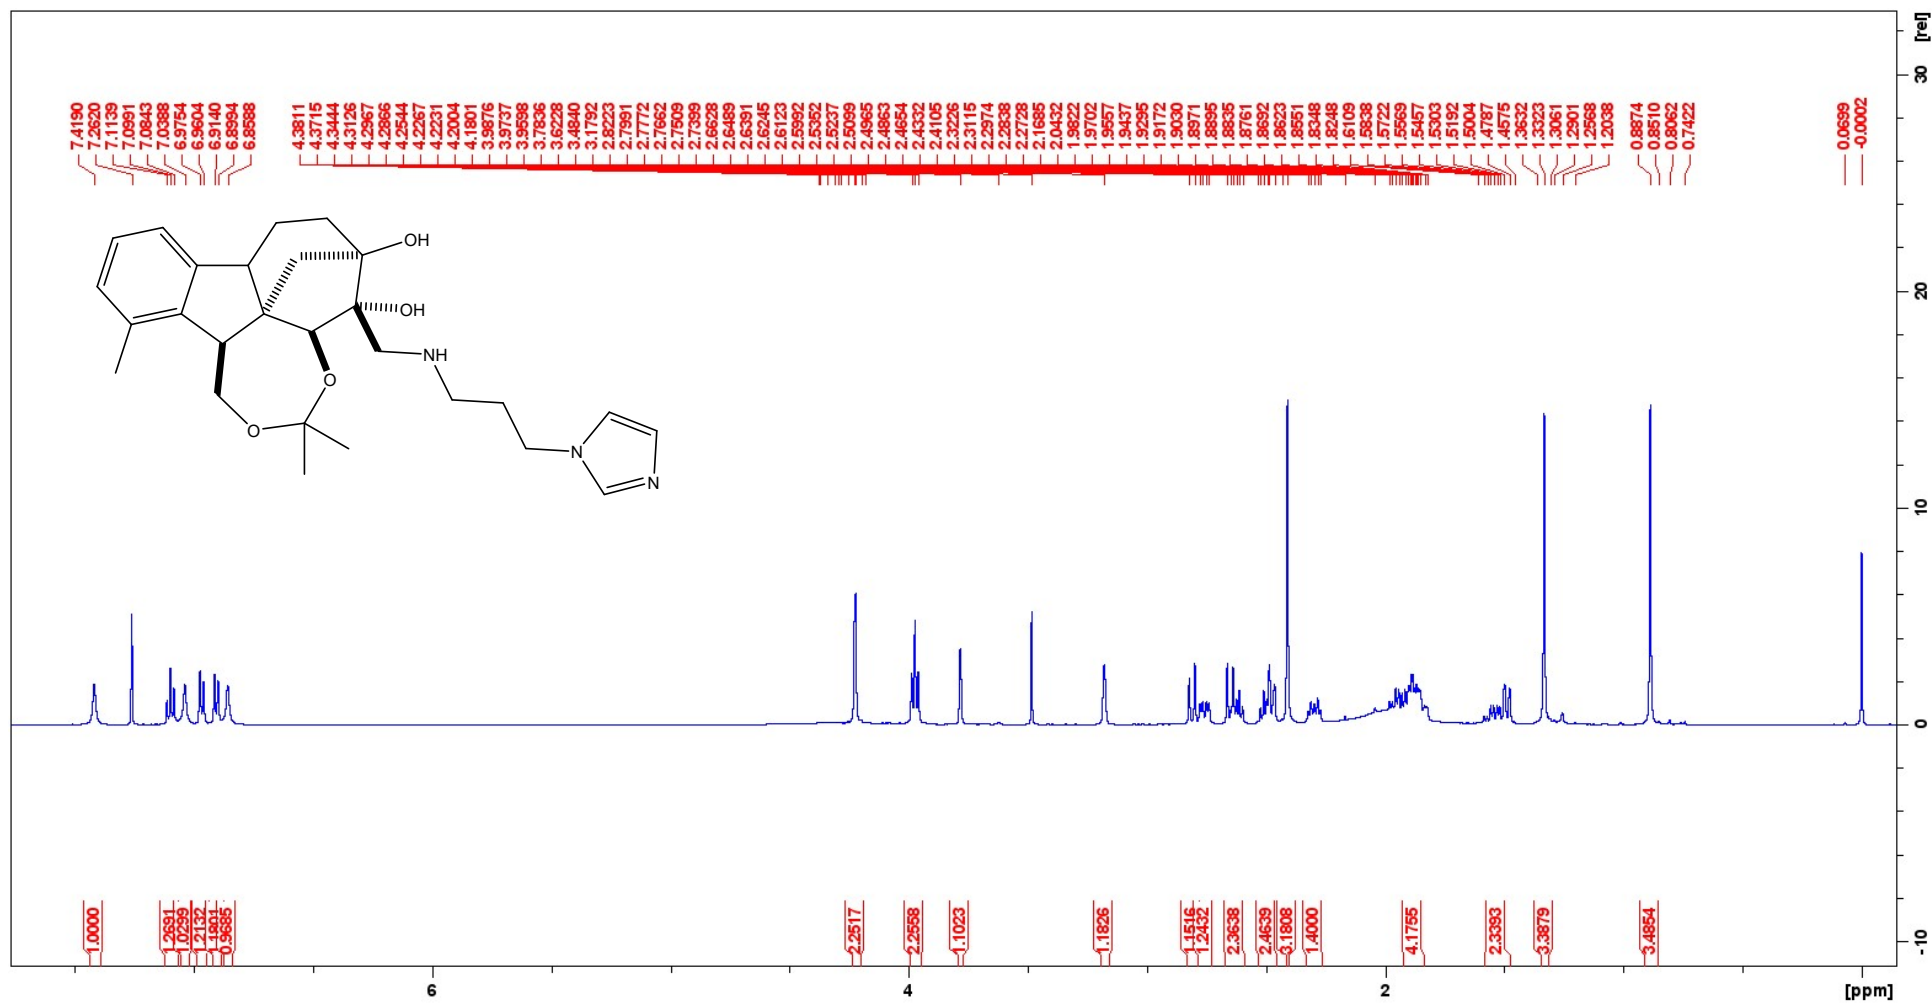



$^{13}\text{C}\{^1\text{H}\}$  J-MOD NMR (125 MHz) of (4a*S*,4a<sup>1</sup>*R*,5*R*,6*S*,12*bS*)-5-(((3-(1*H*-imidazol-1-yl)propyl)amino)methyl)-3,3,12-trimethyl-4a,5,7,8,8a,12b-hexahydro-4a<sup>1</sup>,6-methanobenzo[2,3]azuleno[8,1-de][1,3]dioxepine-5,6(1*H*)-diol **17**

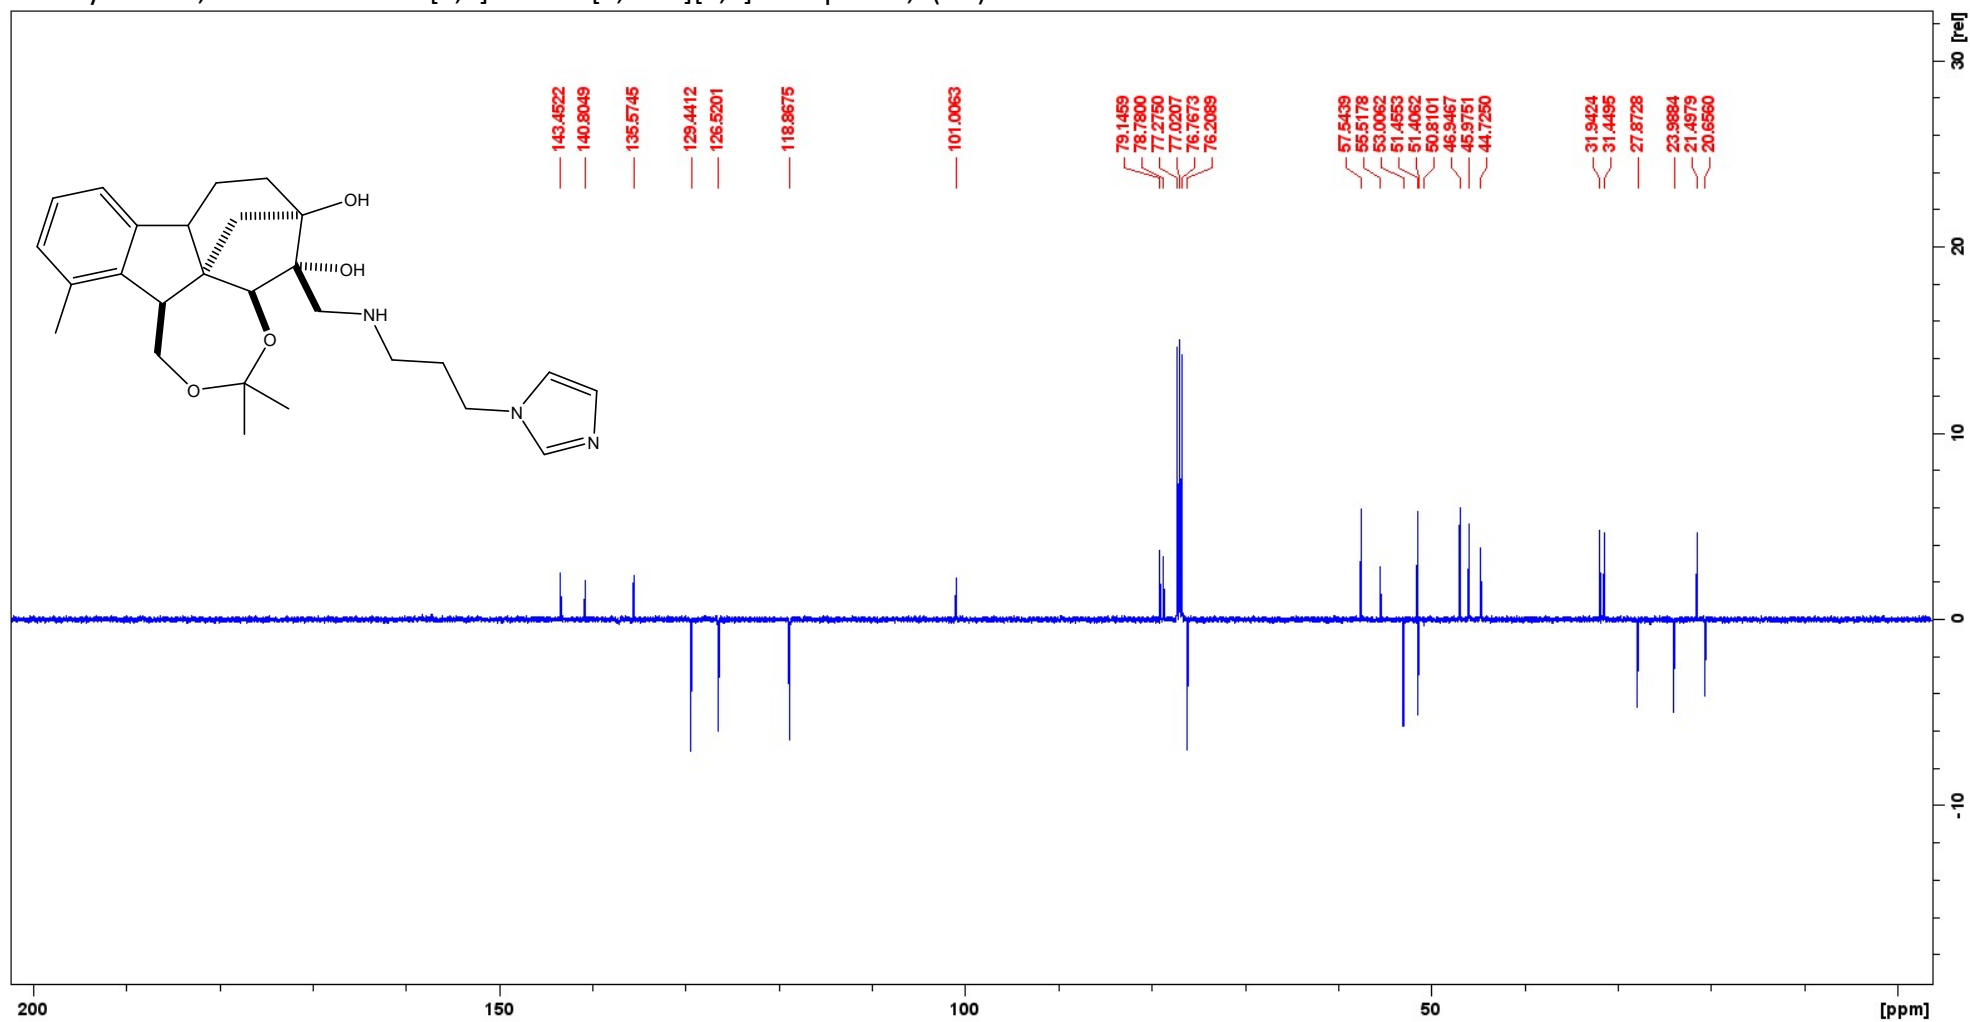

COSY of (4*a**S*,4*a*<sup>1</sup>*R*,5*R*,6*S*,12*b**S*)-5-(((3-(1*H*-imidazol-1-yl)propyl)amino)methyl)-3,3,12-trimethyl-4*a*,5,7,8,8*a*,12*b*-hexahydro-4*a*<sup>1</sup>,6-methanobenzo[2,3]azuleno[8,1-*de*][1,3]dioxepine-5,6(1*H*)-diol **17**

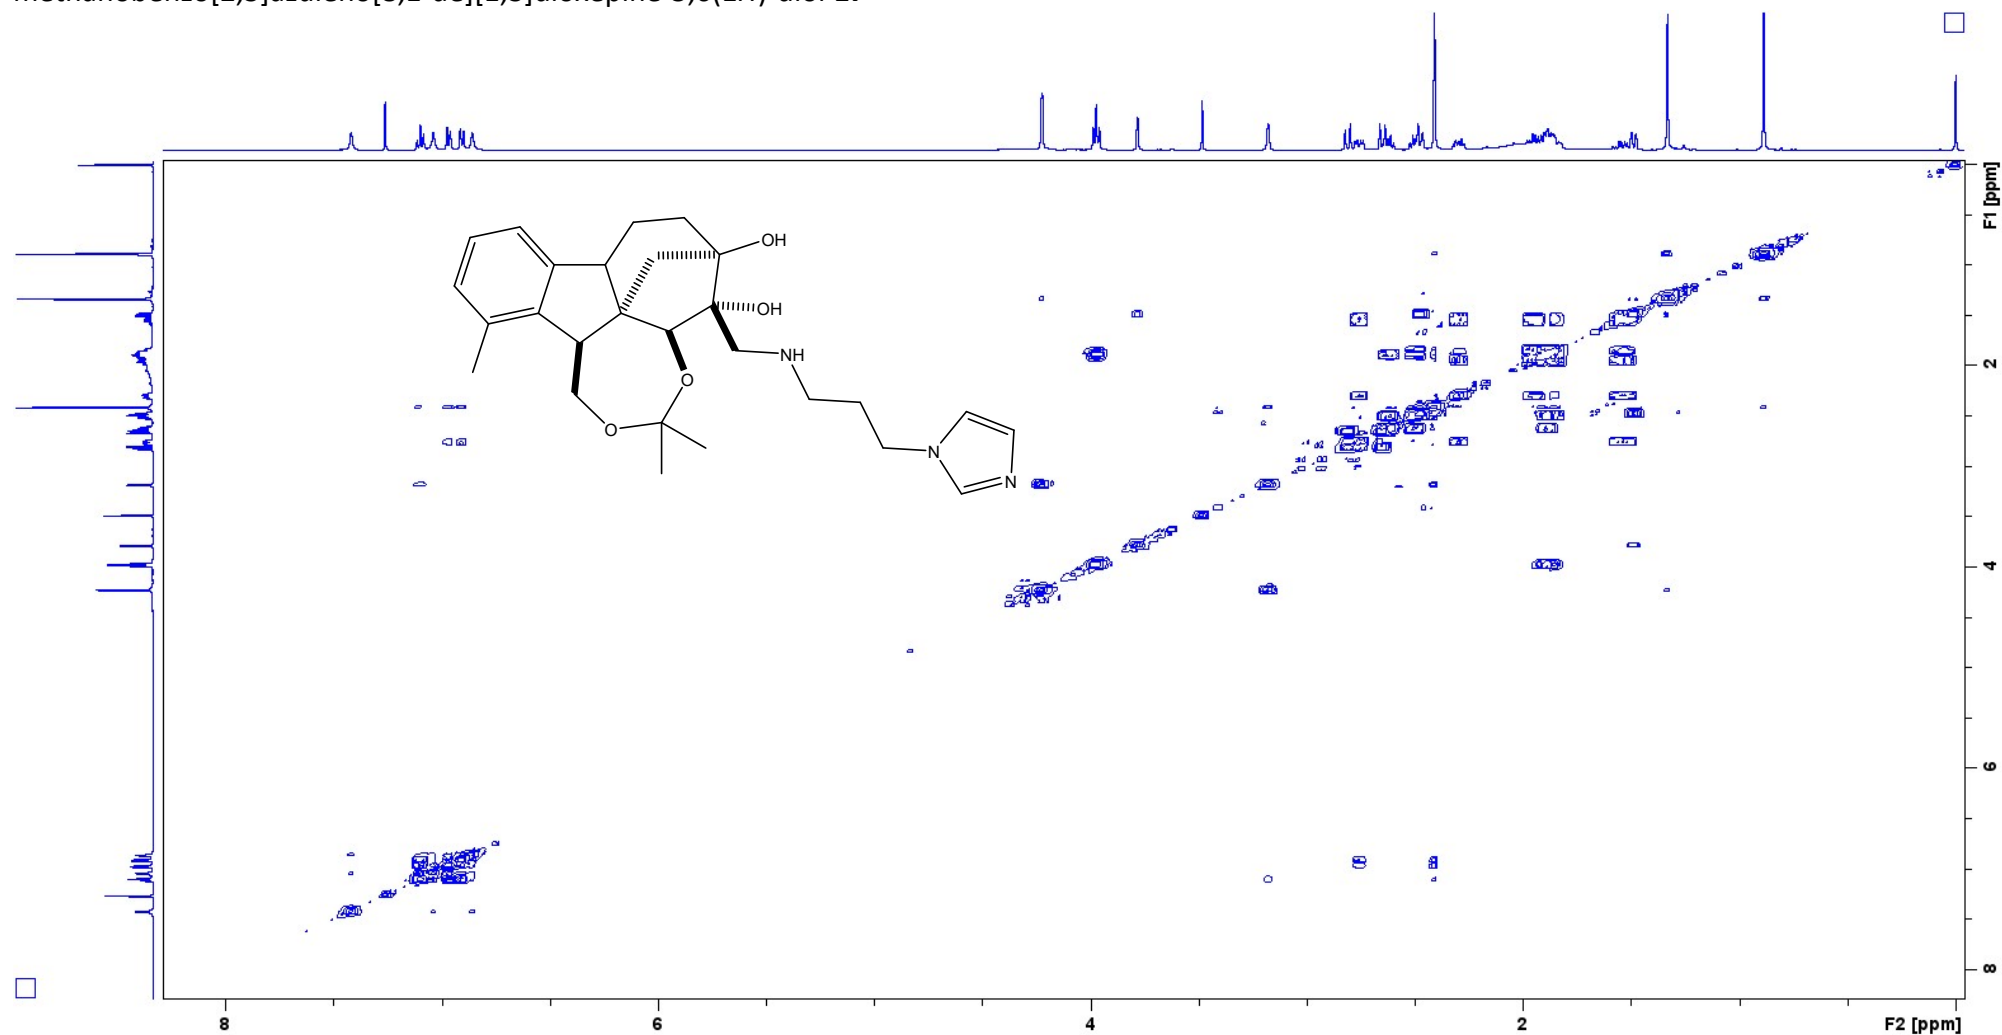

NOESY of (4*S*,4*a*<sup>1</sup>*R*,5*R*,6*S*,12*bS*)-5-(((3-(1*H*-imidazol-1-yl)propyl)amino)methyl)-3,3,12-trimethyl-4*a*,5,7,8,8*a*,12*b*-hexahydro-4*a*<sup>1</sup>,6-methanobenzo[2,3]azuleno[8,1-*de*][1,3]dioxepine-5,6(1*H*)-diol **17**

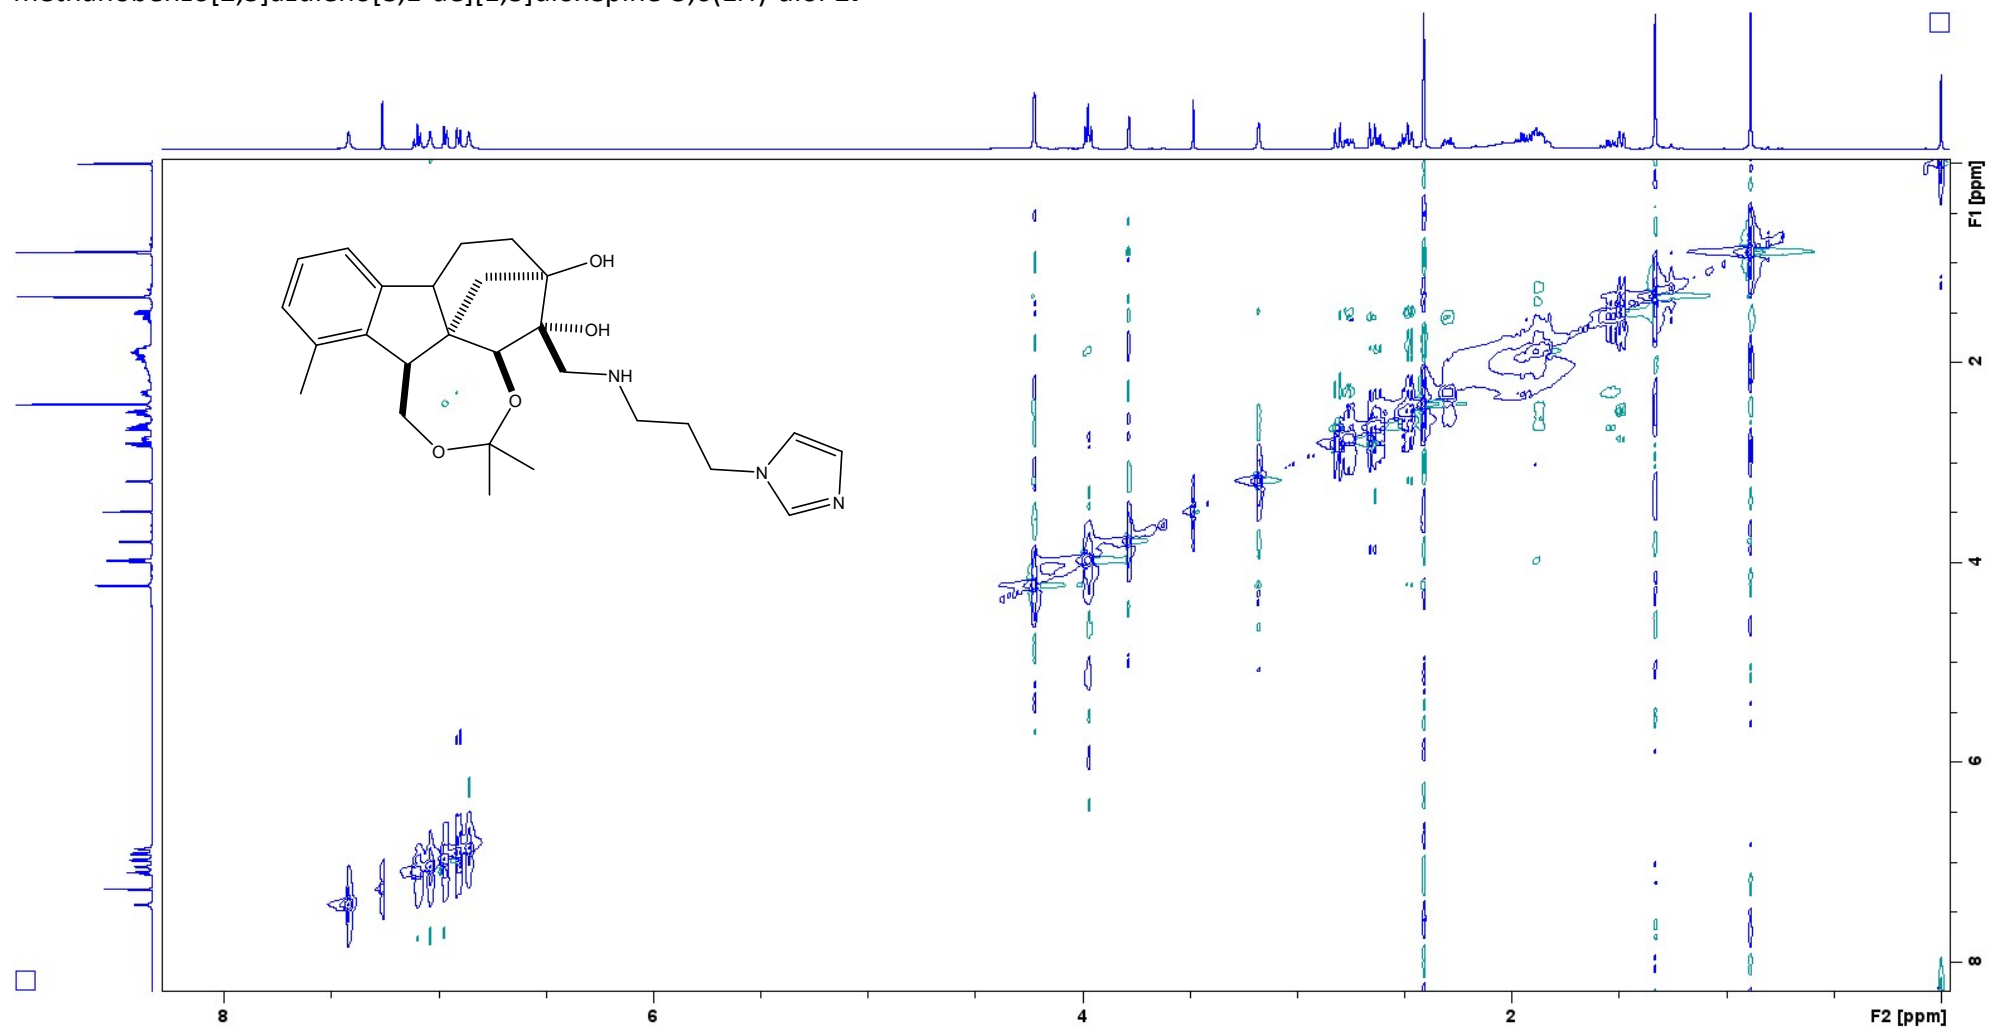

HSQC of (4*a**S*,4*a*<sup>1</sup>*R*,5*R*,6*S*,12*b**S*)-5-(((3-(1*H*-imidazol-1-yl)propyl)amino)methyl)-3,3,12-trimethyl-4*a*,5,7,8,8*a*,12*b*-hexahydro-4*a*<sup>1</sup>,6-methanobenzo[2,3]azuleno[8,1-*de*][1,3]dioxepine-5,6(1*H*)-diol **17**

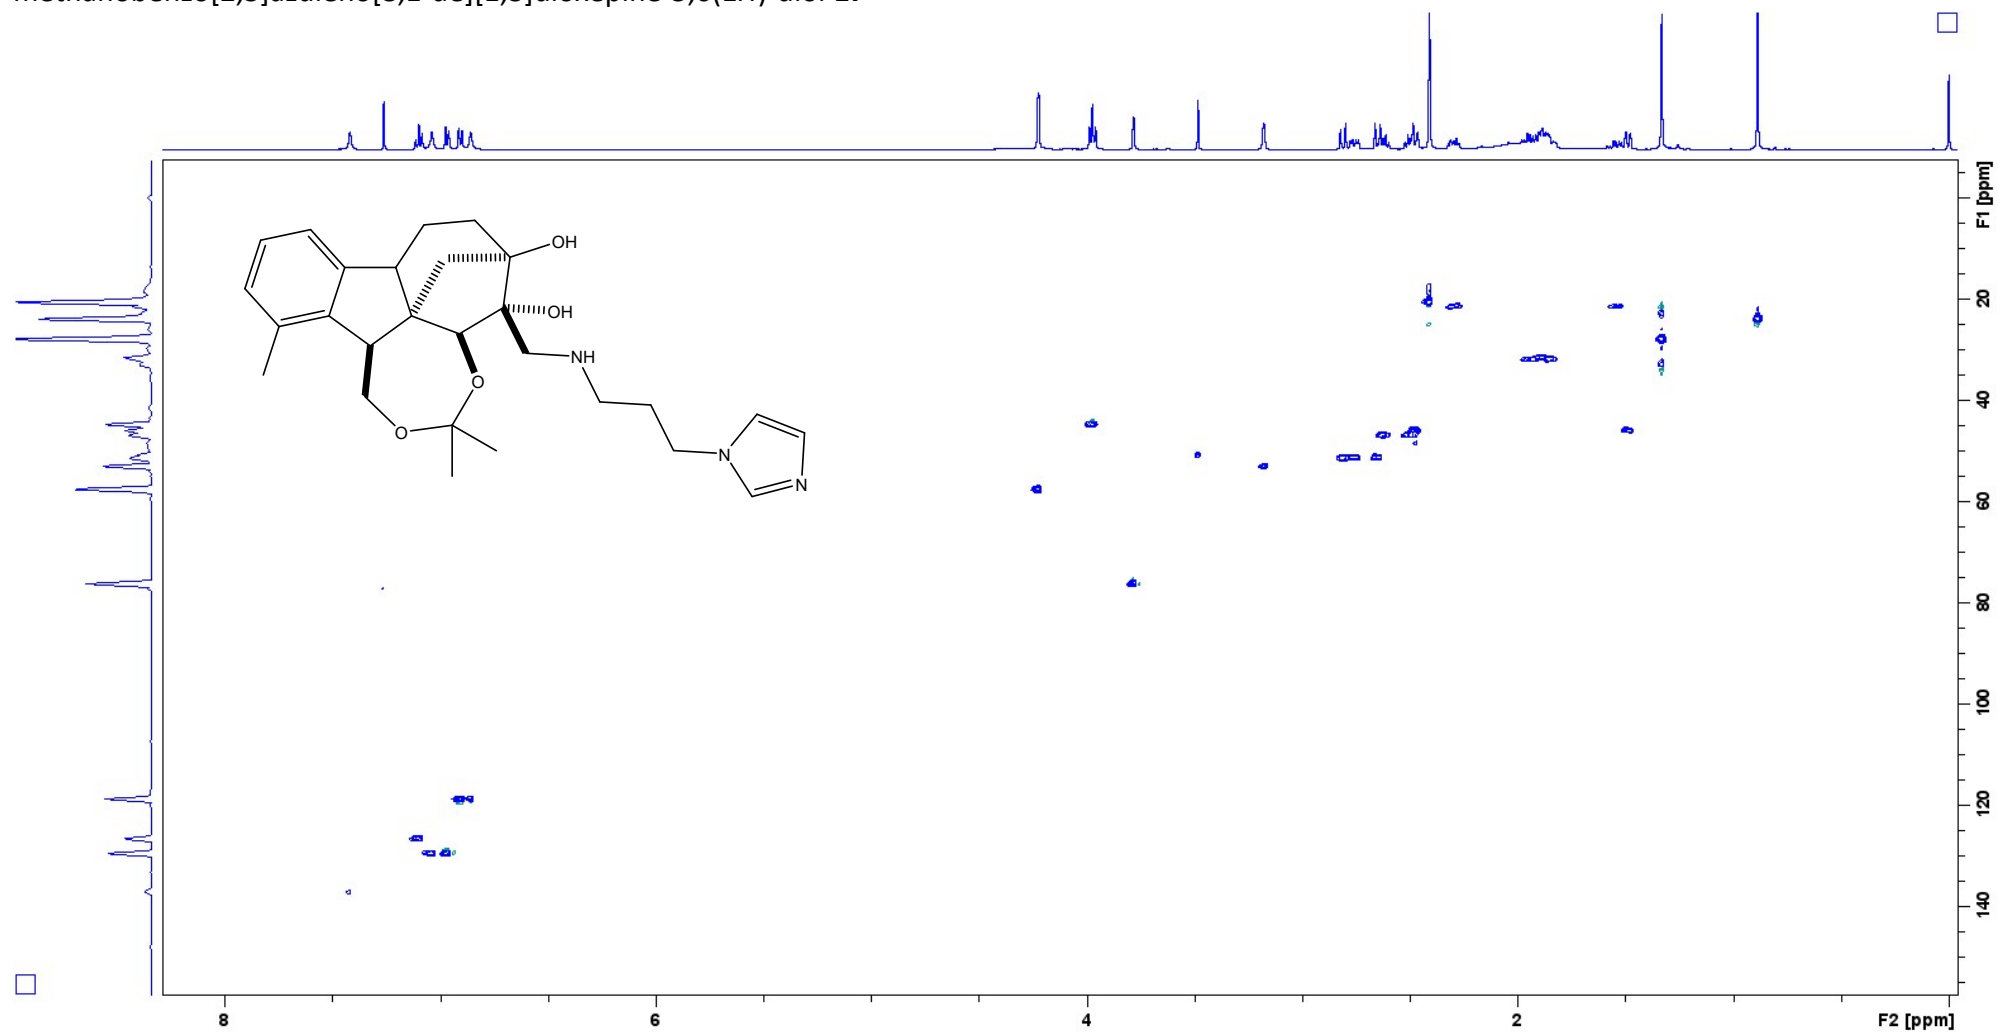

HMBC of (4*a**S*,4*a*<sup>1</sup>*R*,5*R*,6*S*,12*b**S*)-5-(((3-(1*H*-imidazol-1-yl)propyl)amino)methyl)-3,3,12-trimethyl-4*a*,5,7,8,8*a*,12*b*-hexahydro-4*a*<sup>1</sup>,6-methanobenzo[2,3]azuleno[8,1-*de*][1,3]dioxepine-5,6(1*H*)-diol **17**

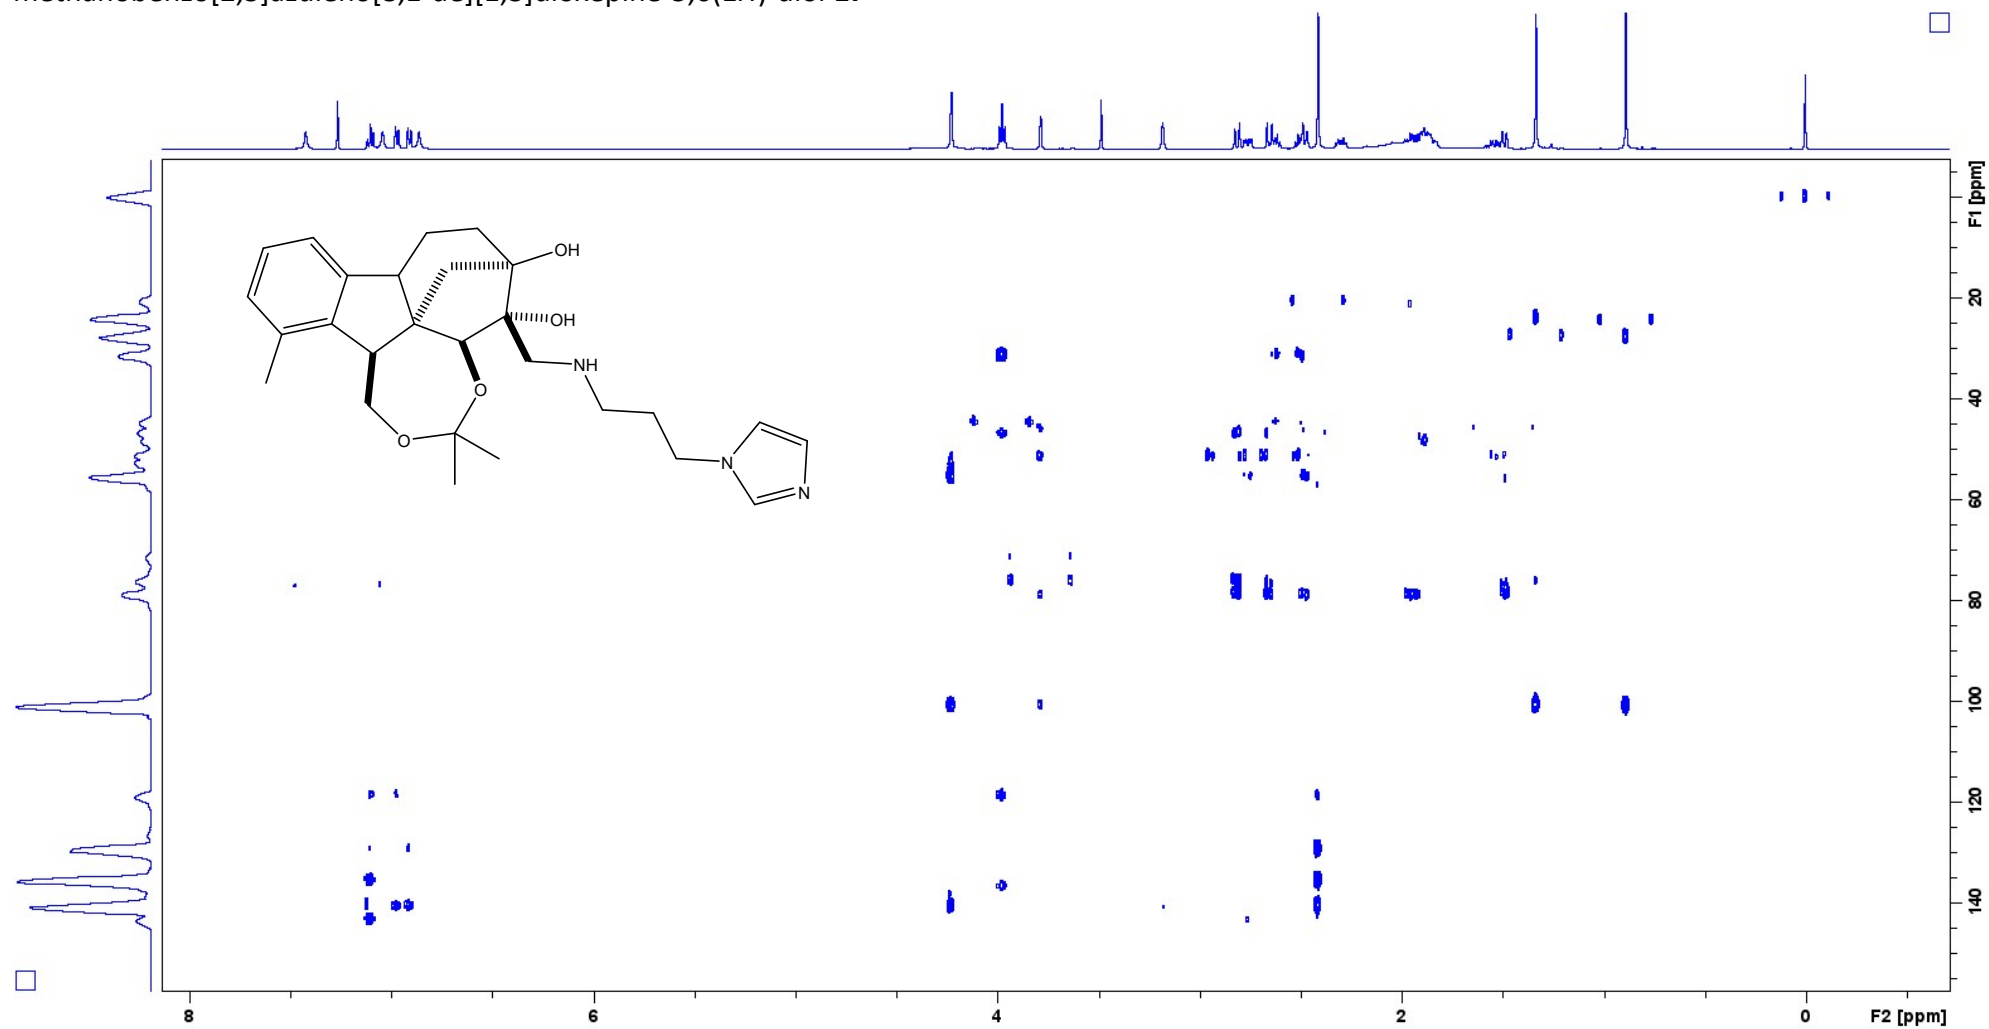

$^1\text{H-NMR}$  (500 MHz) of (4a*S*,4a<sup>1</sup>*R*,5*R*,6*S*,12*bS*)-5-(((2-((5-Fluoro-2-((4-(trifluoromethyl)phenyl)amino)pyrimidin-4-yl)amino)ethyl)amino)methyl)-3,3,12-trimethyl-4a,5,7,8,8a,12*b*-hexahydro-4a<sup>1</sup>,6-methanobenzo[2,3]azuleno[8,1-*de*][1,3]dioxepine-5,6(1*H*)-diol **18**

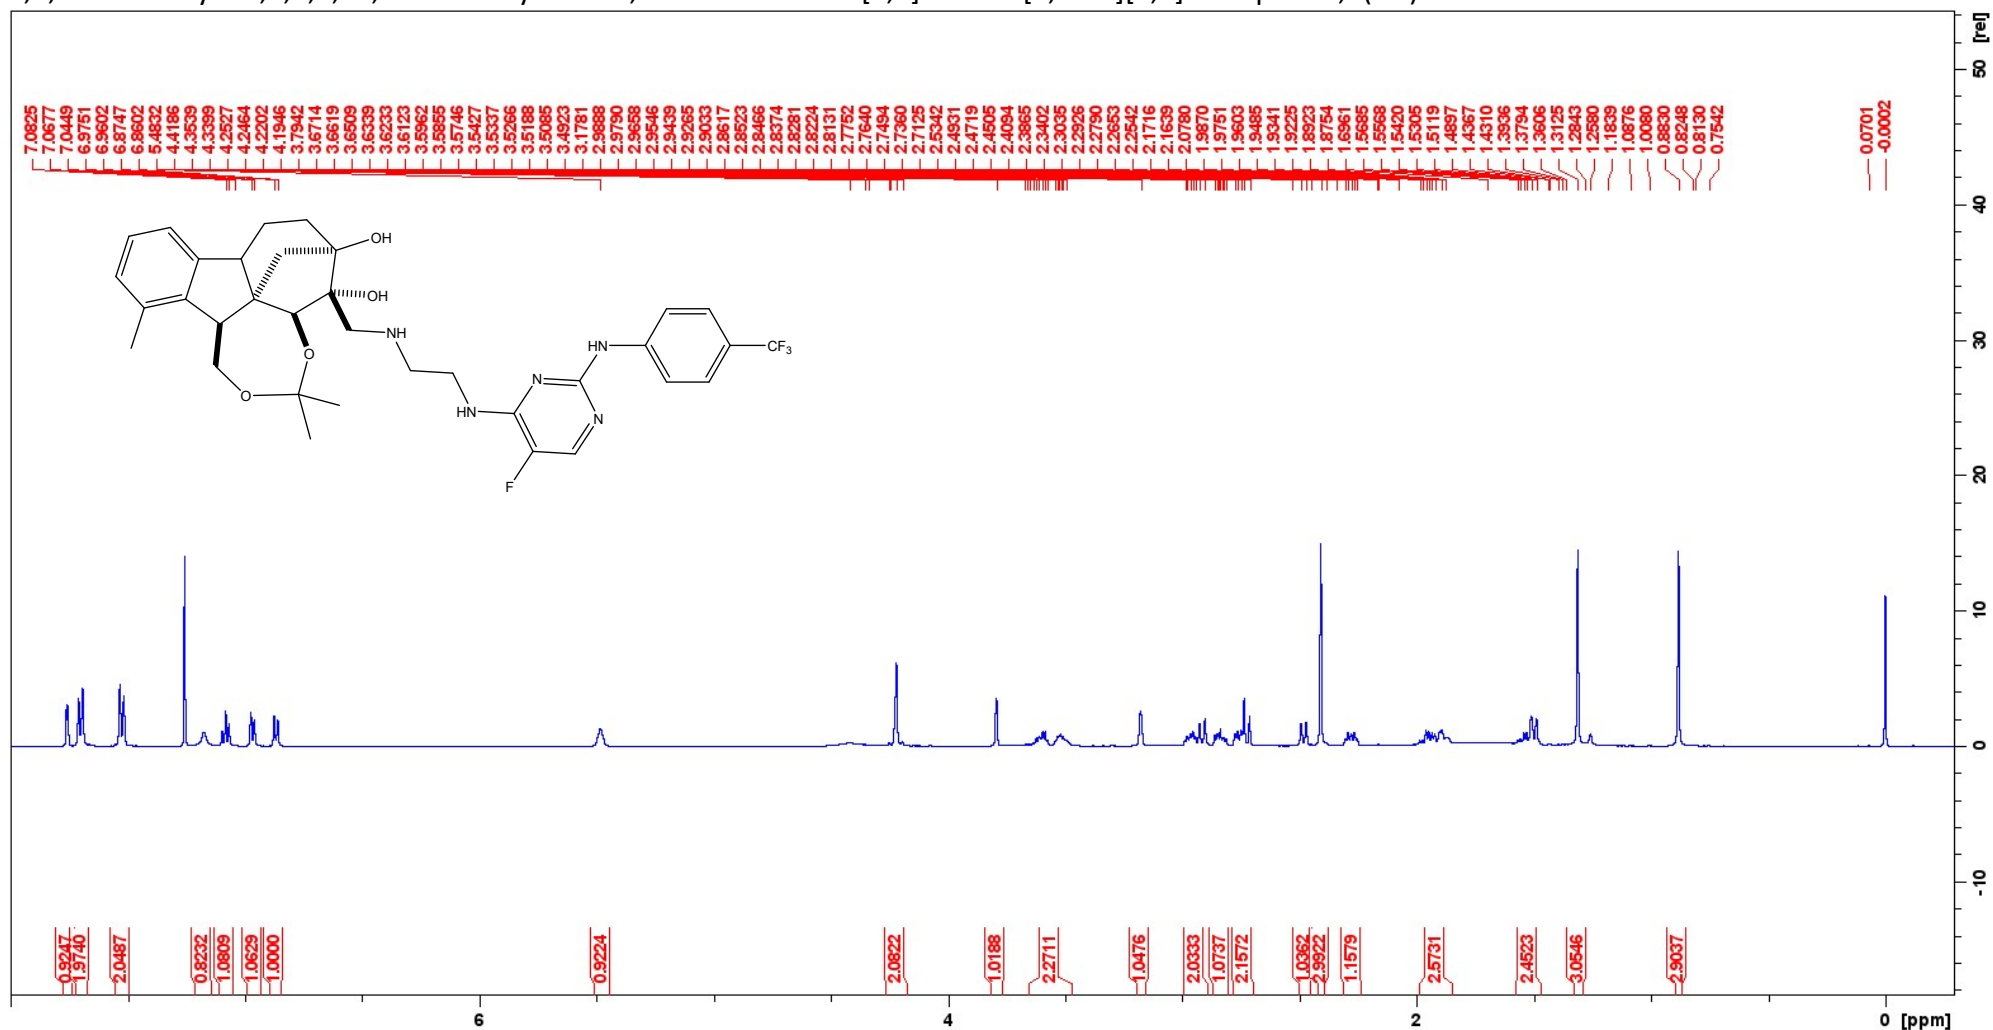

$^{13}\text{C}\{^1\text{H}\}$  J-MOD NMR (125 MHz) of (4*S*,4*a*<sup>1</sup>*R*,5*R*,6*S*,12*bS*)-5-(((2-((5-Fluoro-2-((4-(trifluoromethyl)phenyl)amino)pyrimidin-4-yl)amino)ethyl)amino)methyl)-3,3,12-trimethyl-4*a*,5,7,8,8*a*,12*b*-hexahydro-4*a*<sup>1</sup>,6-methanobenzo[2,3]azuleno[8,1-*de*][1,3]dioxepine-5,6(1*H*)-diol **18**

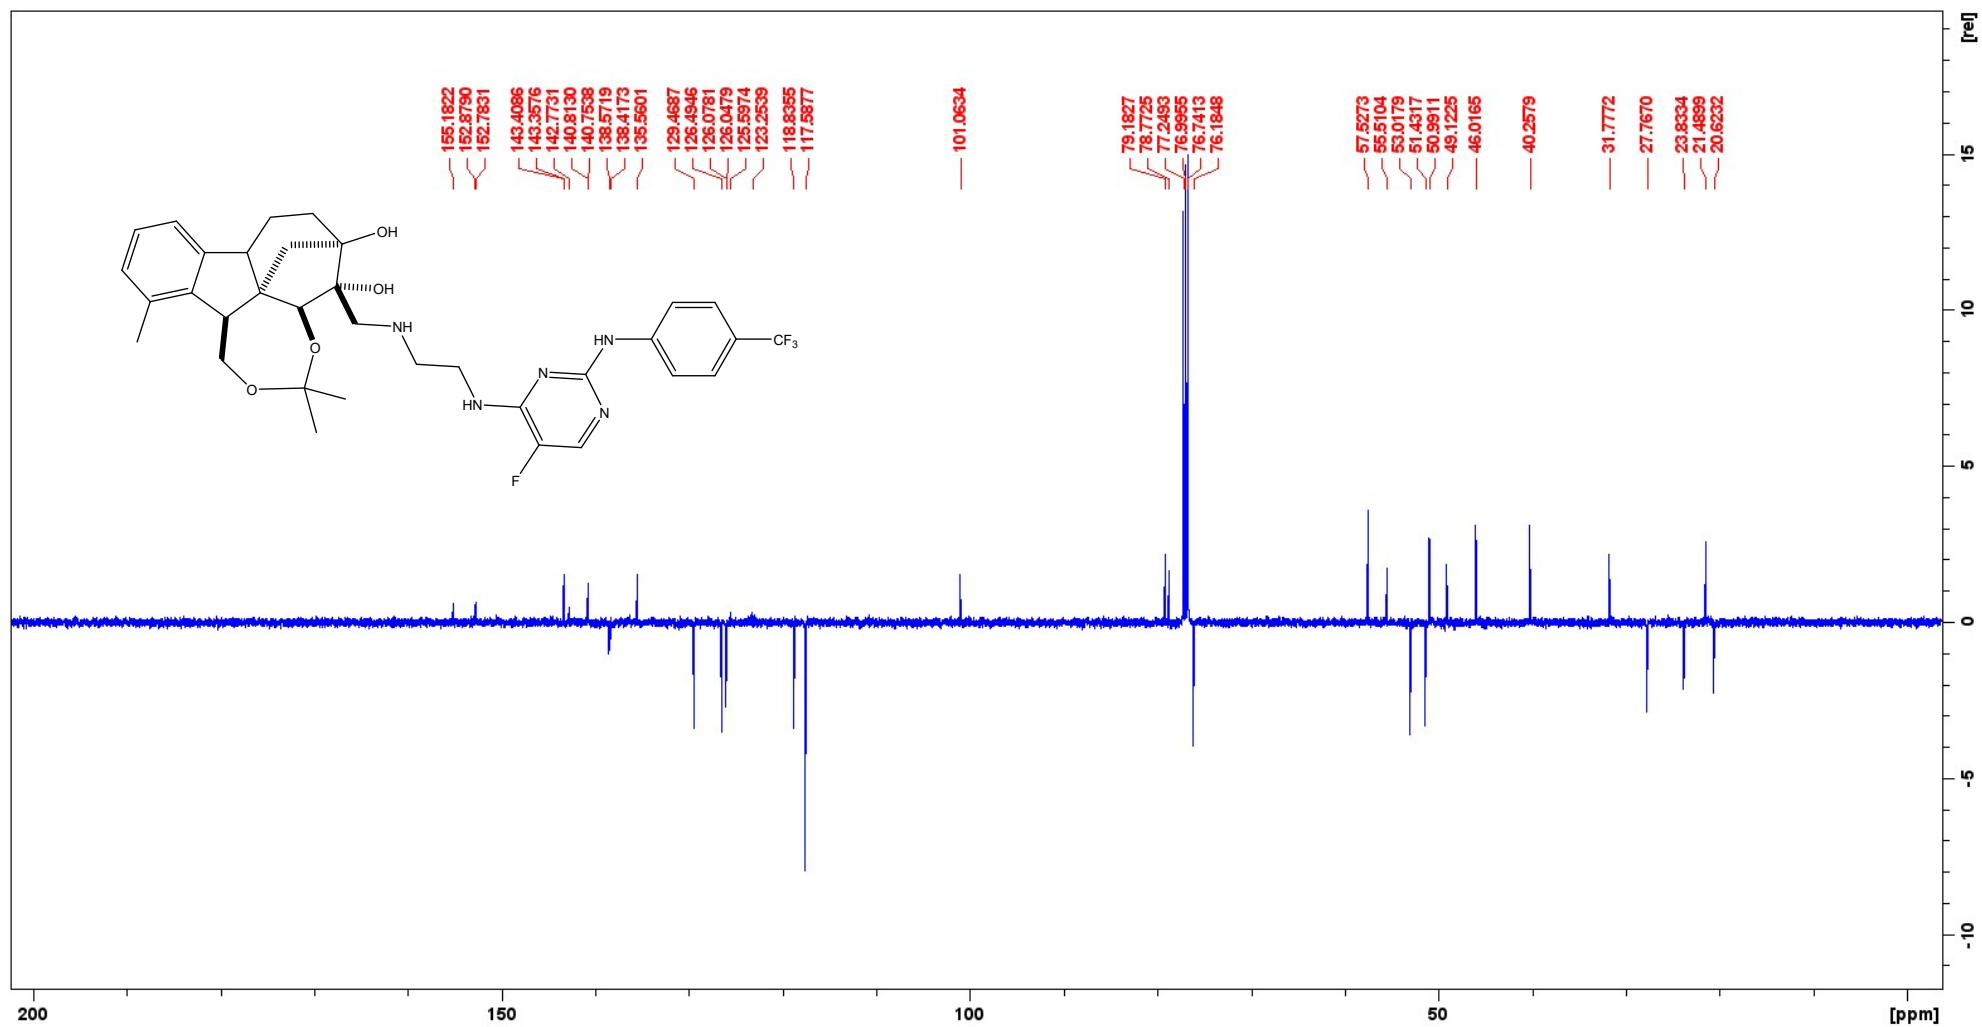

COSY of (4*S*,4*a*<sup>1</sup>*R*,5*R*,6*S*,12*b**S*)-5-(((2-((5-Fluoro-2-((4-(trifluoromethyl)phenyl)amino)pyrimidin-4-yl)amino)ethyl)amino)methyl)-3,3,12-trimethyl-4*a*,5,7,8,8*a*,12*b*-hexahydro-4*a*<sup>1</sup>,6-methanobenzo[2,3]azuleno[8,1-*de*][1,3]dioxepine-5,6(1*H*)-diol **18**

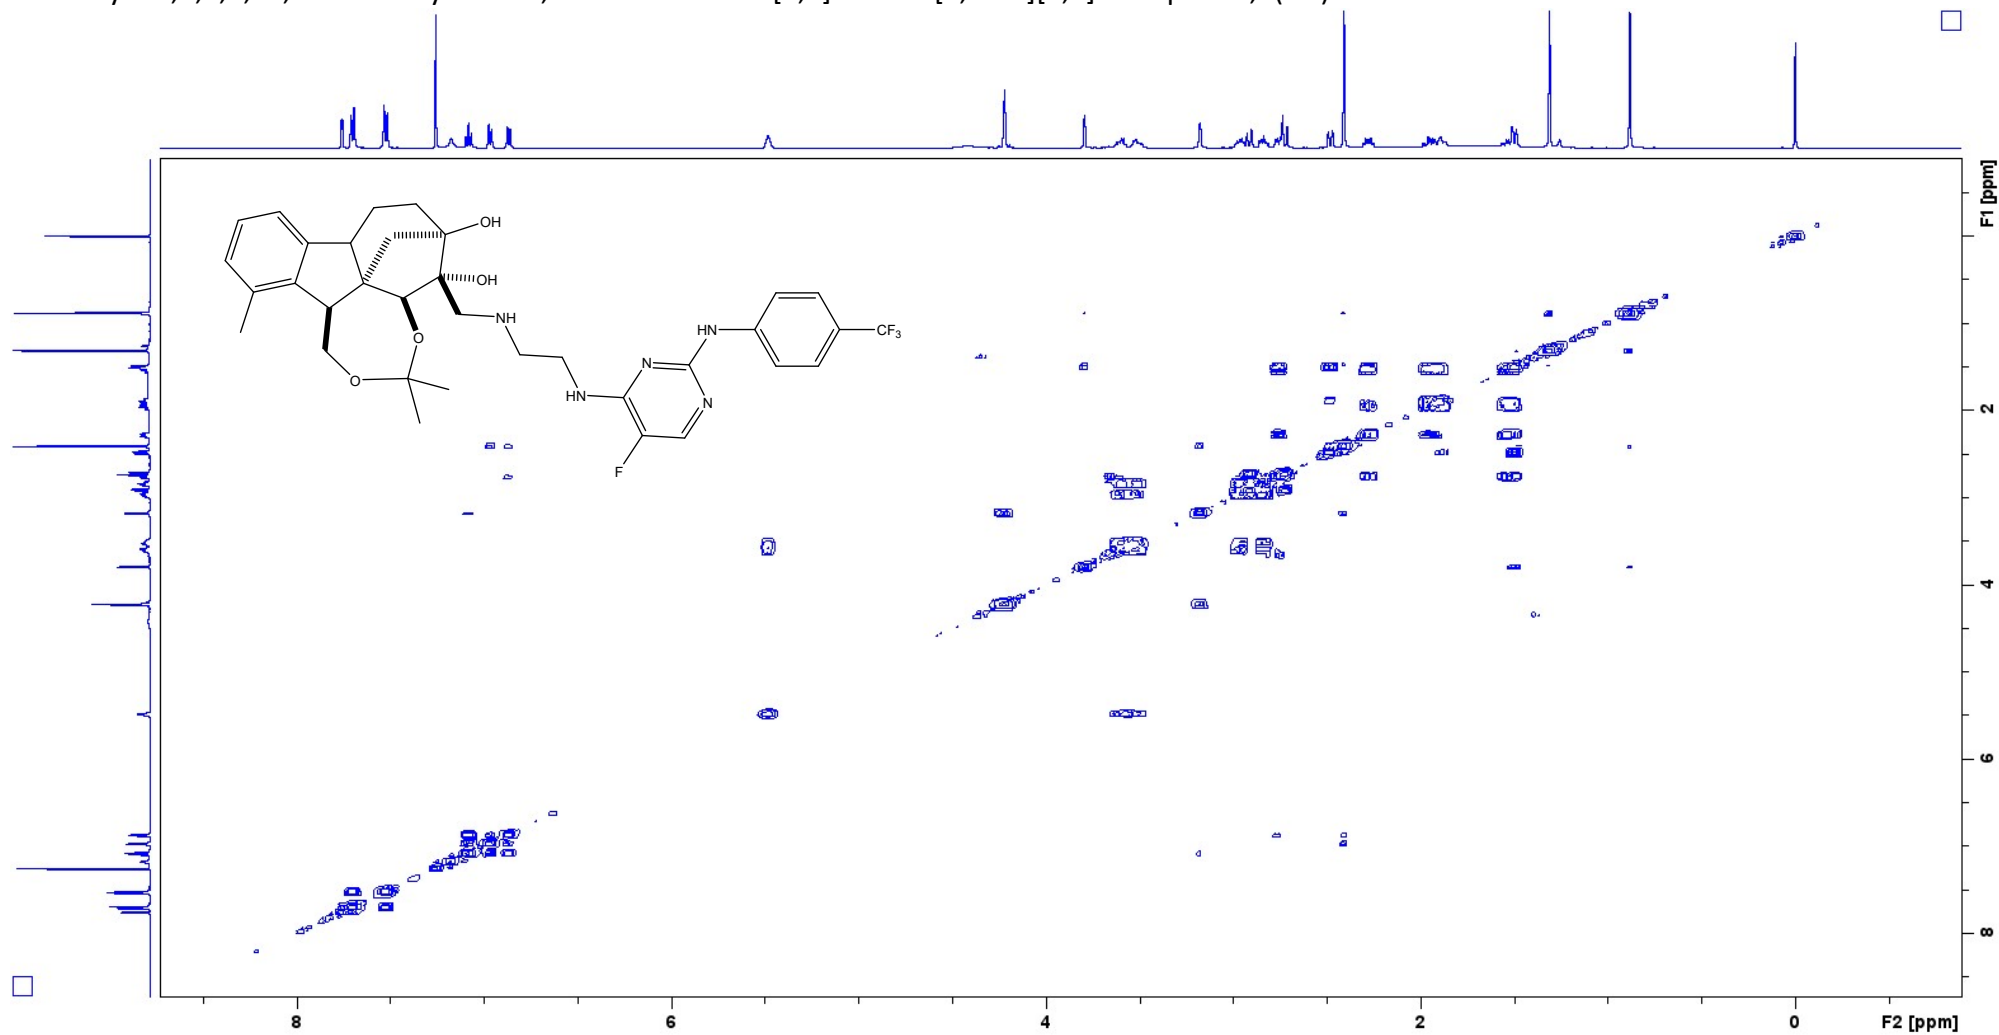



NOESY of (4*S*,4*a*<sup>1</sup>*R*,5*R*,6*S*,12*b**S*)-5-(((2-((5-Fluoro-2-((4-(trifluoromethyl)phenyl)amino)pyrimidin-4-yl)amino)ethyl)amino)methyl)-3,3,12-trimethyl-4*a*,5,7,8,8*a*,12*b*-hexahydro-4*a*<sup>1</sup>,6-methanobenzo[2,3]azuleno[8,1-*de*][1,3]dioxepine-5,6(1*H*)-diol **18**

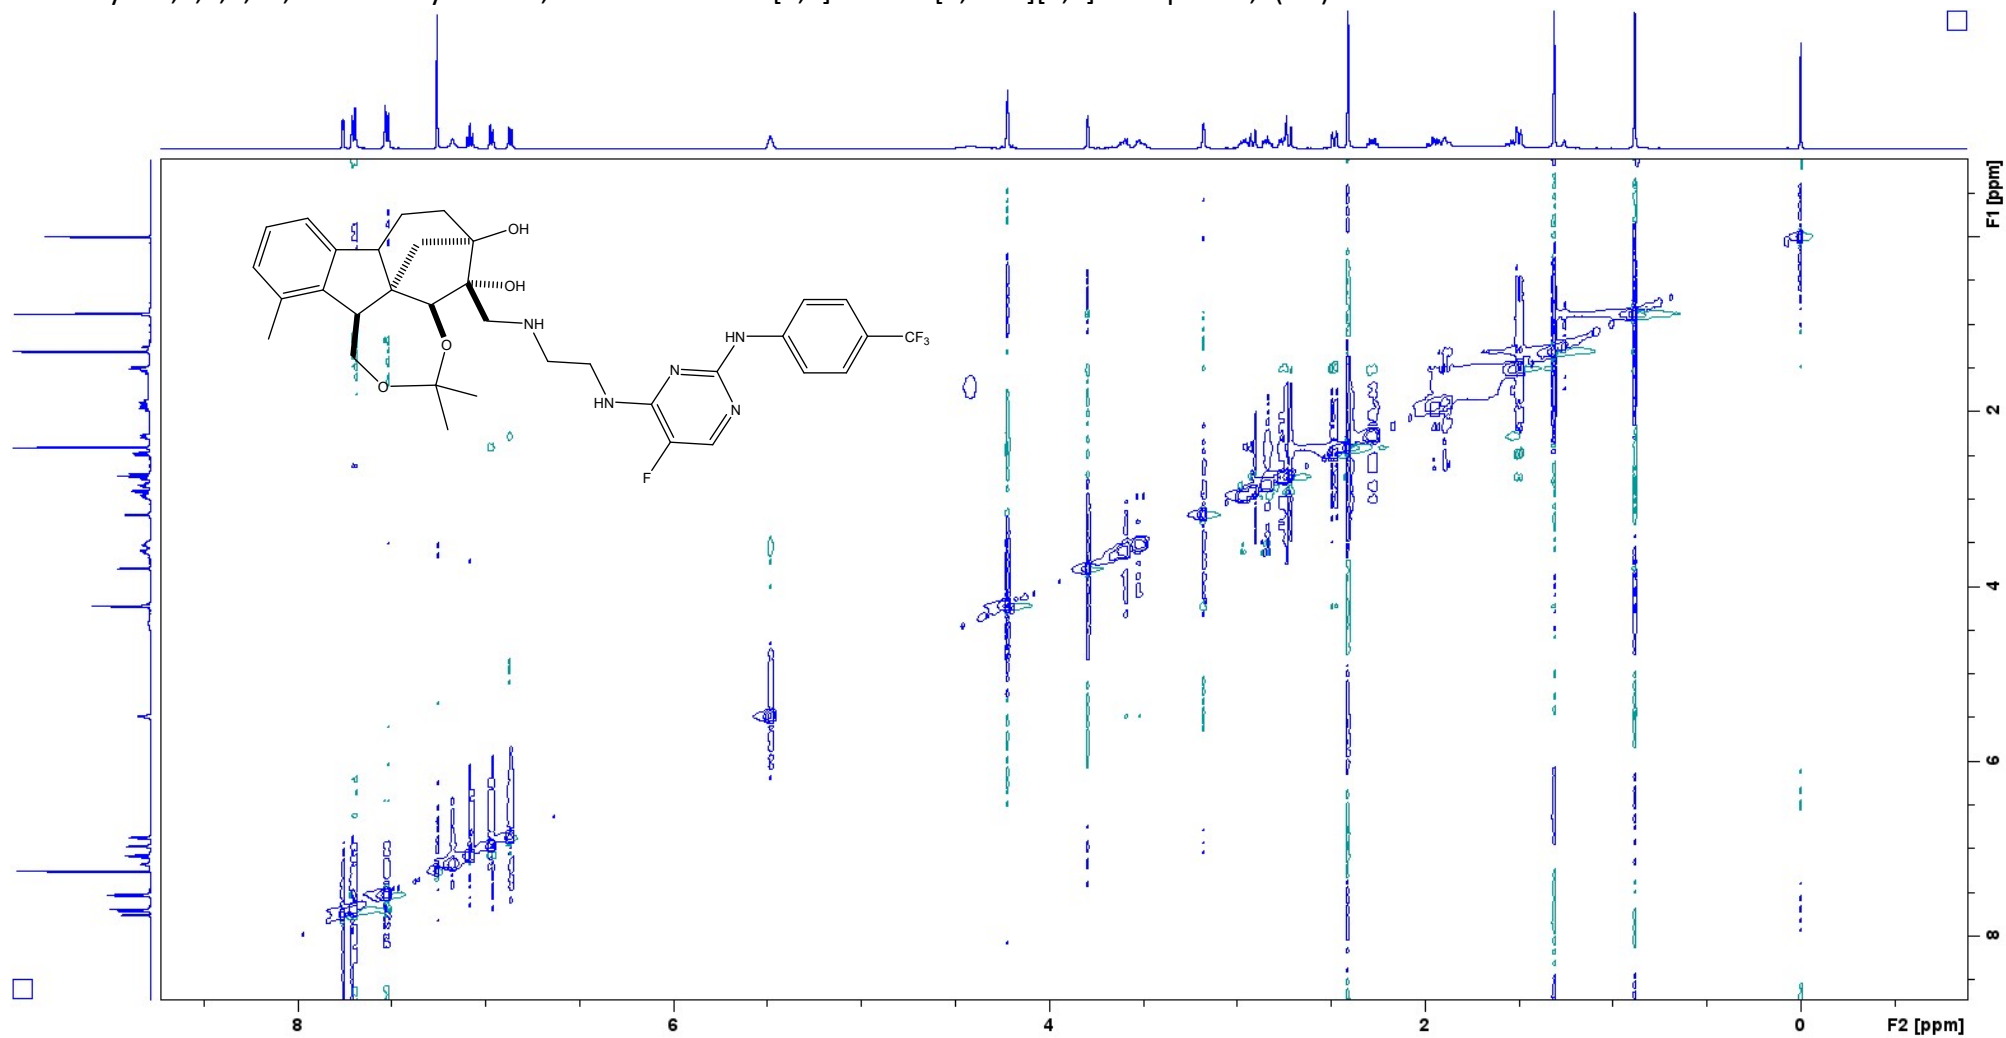

HSQC of (4*S*,4*a*<sup>1</sup>*R*,5*R*,6*S*,12*bS*)-5-(((2-((5-Fluoro-2-((4-(trifluoromethyl)phenyl)amino)pyrimidin-4-yl)amino)ethyl)amino)methyl)-3,3,12-trimethyl-4*a*,5,7,8,8*a*,12*b*-hexahydro-4*a*<sup>1</sup>,6-methanobenzo[2,3]azuleno[8,1-*de*][1,3]dioxepine-5,6(1*H*)-diol **18**

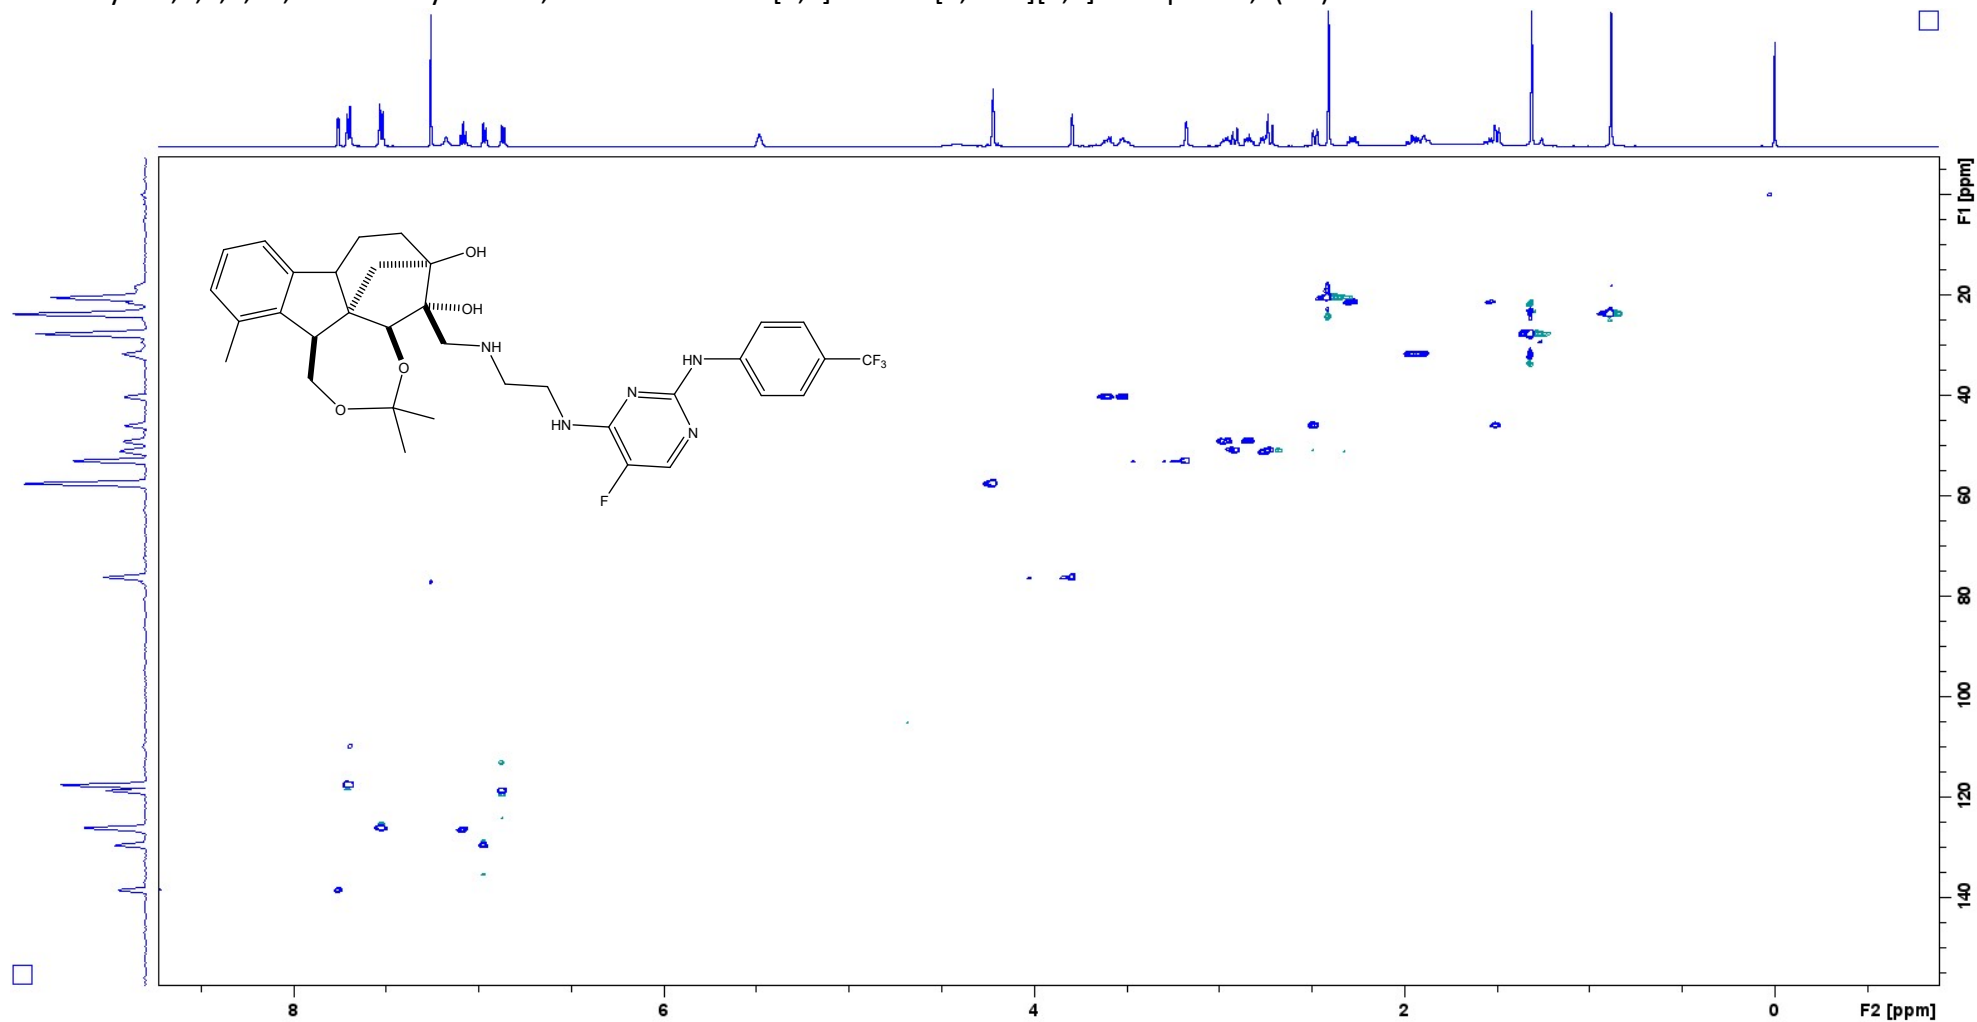

HMBC of (4*S*,4*a*<sup>1</sup>*R*,5*R*,6*S*,12*bS*)-5-(((2-((5-Fluoro-2-((4-(trifluoromethyl)phenyl)amino)pyrimidin-4-yl)amino)ethyl)amino)methyl)-3,3,12-trimethyl-4*a*,5,7,8,8*a*,12*b*-hexahydro-4*a*<sup>1</sup>,6-methanobenzo[2,3]azuleno[8,1-*de*][1,3]dioxepine-5,6(1*H*)-diol **18**

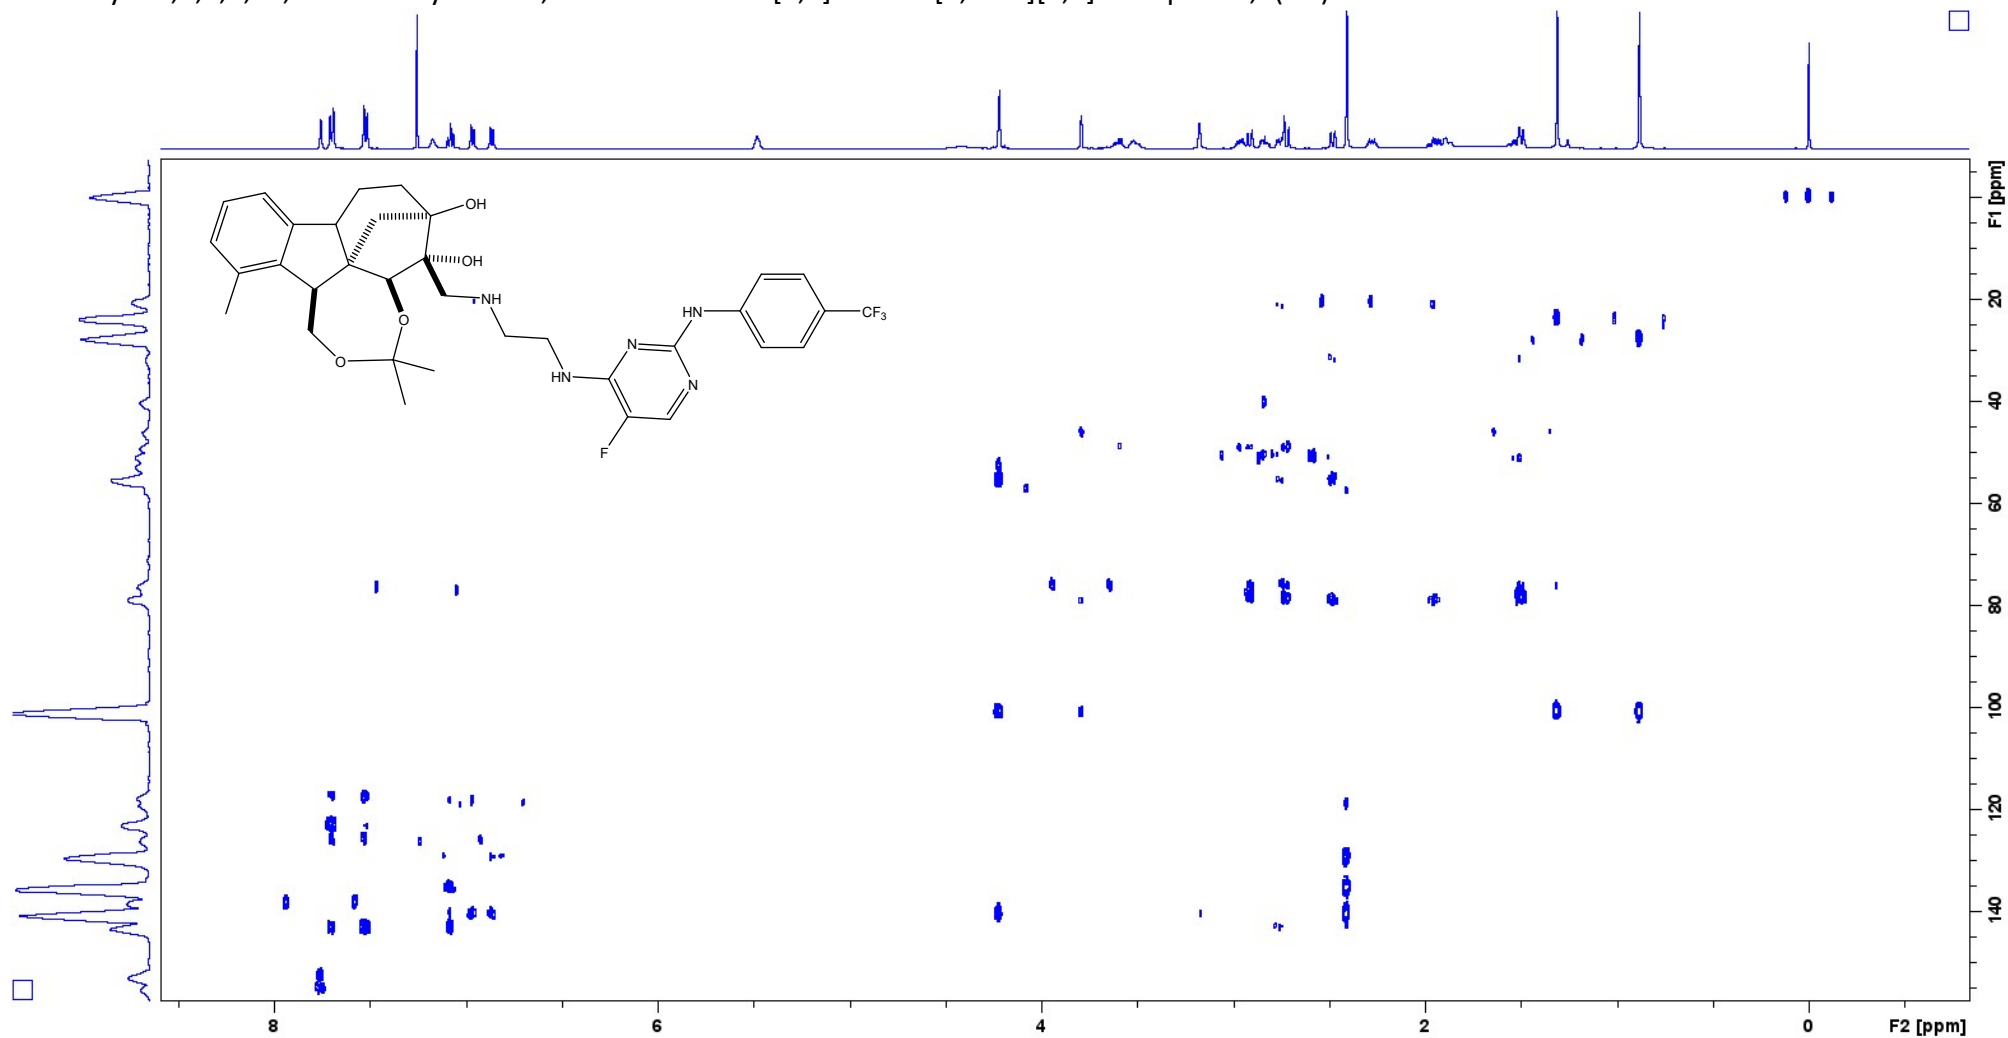

<sup>19</sup>F J-MOD NMR (470 MHz) of (4a*S*,4a<sup>1</sup>*R*,5*R*,6*S*,12*bS*)-5-(((2-((5-Fluoro-2-((4-(trifluoromethyl)phenyl)amino)pyrimidin-4-yl)amino)ethyl)amino)methyl)-3,3,12-trimethyl-4a,5,7,8,8a,12b-hexahydro-4a<sup>1</sup>,6-methanobenzo[2,3]azuleno[8,1-de][1,3]dioxepine-5,6(1*H*)-diol **18**

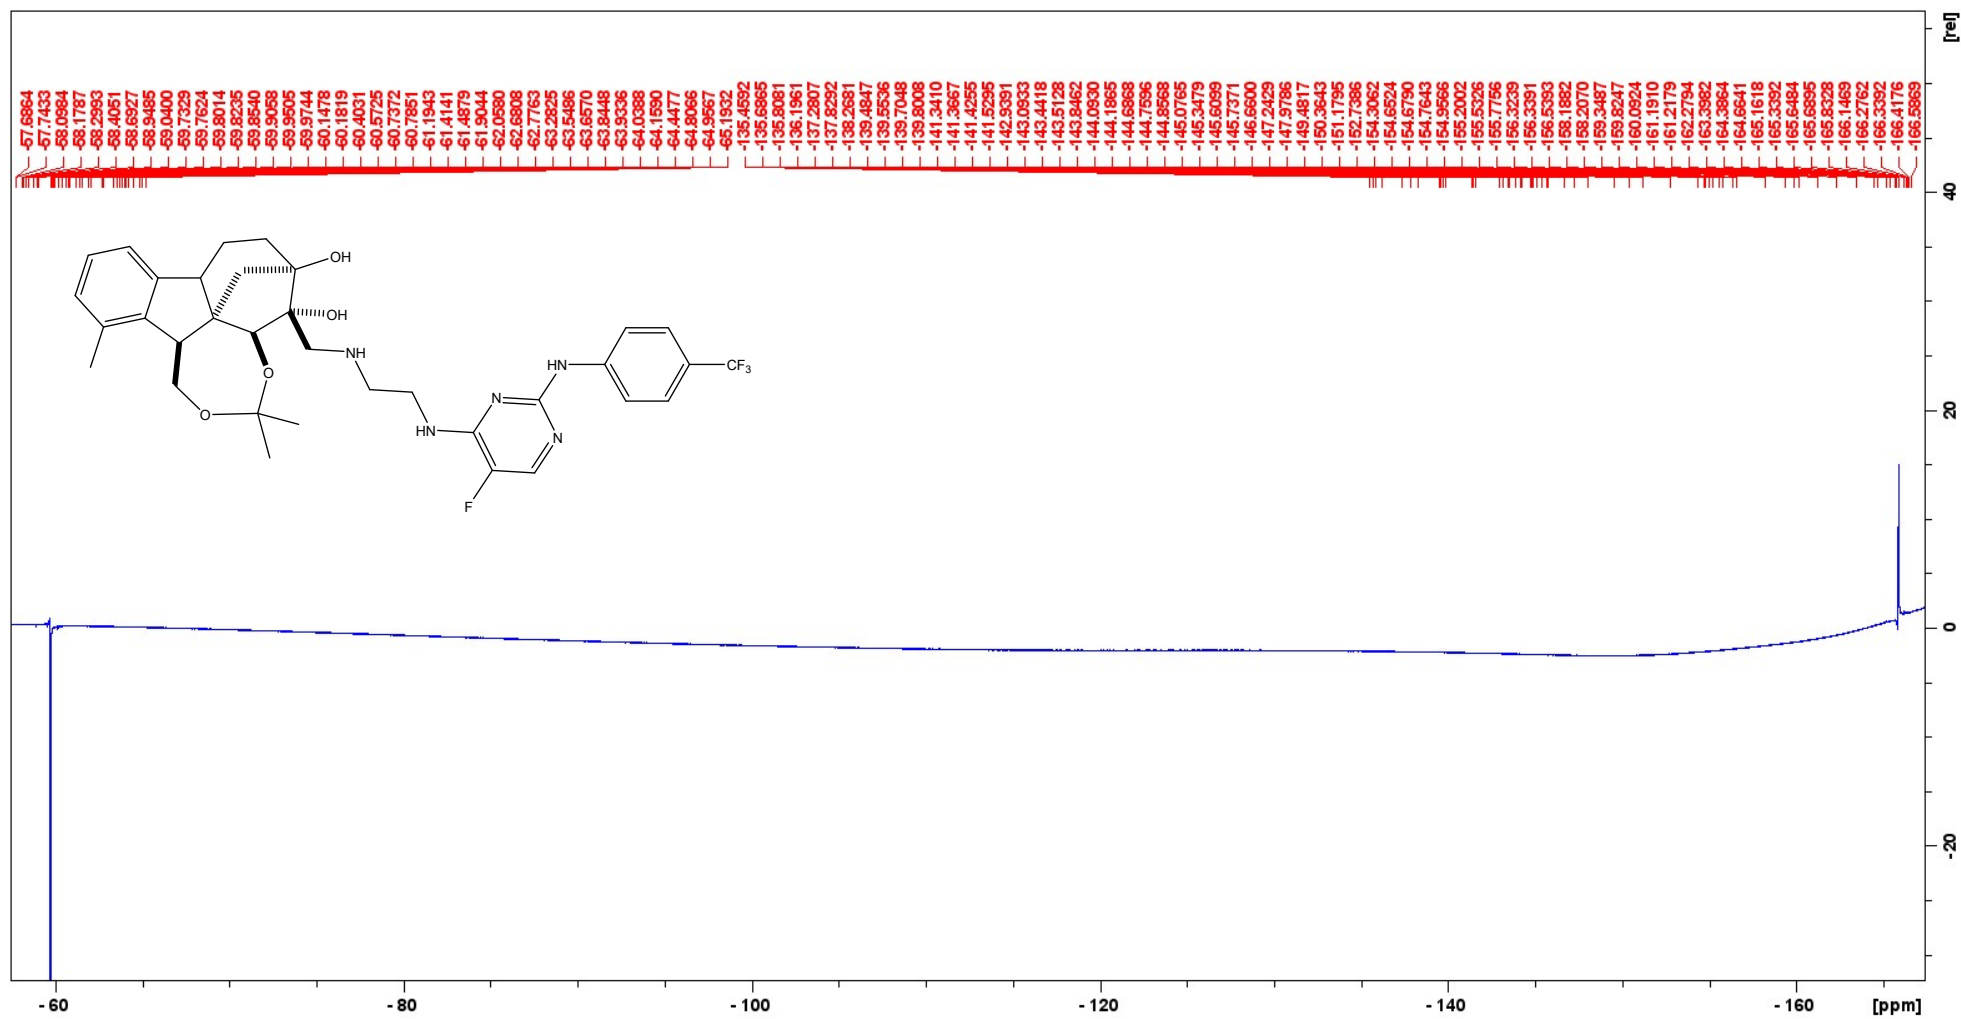

<sup>1</sup>H-NMR (500 MHz) of (4a*S*,4a<sup>1</sup>*R*,5*R*,6*S*,12*bS*)-5-((4-(((5-Fluoro-2-((1-methyl-1*H*-pyrazol-4-yl)amino)pyrimidin-4-yl)amino)methyl)-1*H*-1,2,3-triazol-1-yl)methyl)-3,3,12-trimethyl-4a,5,7,8,8a,12*b*-hexahydro-4a,1,6-methanobenzo[2,3]azuleno[8,1-*de*][1,3]dioxepine-5,6(1*H*)-diol **30**

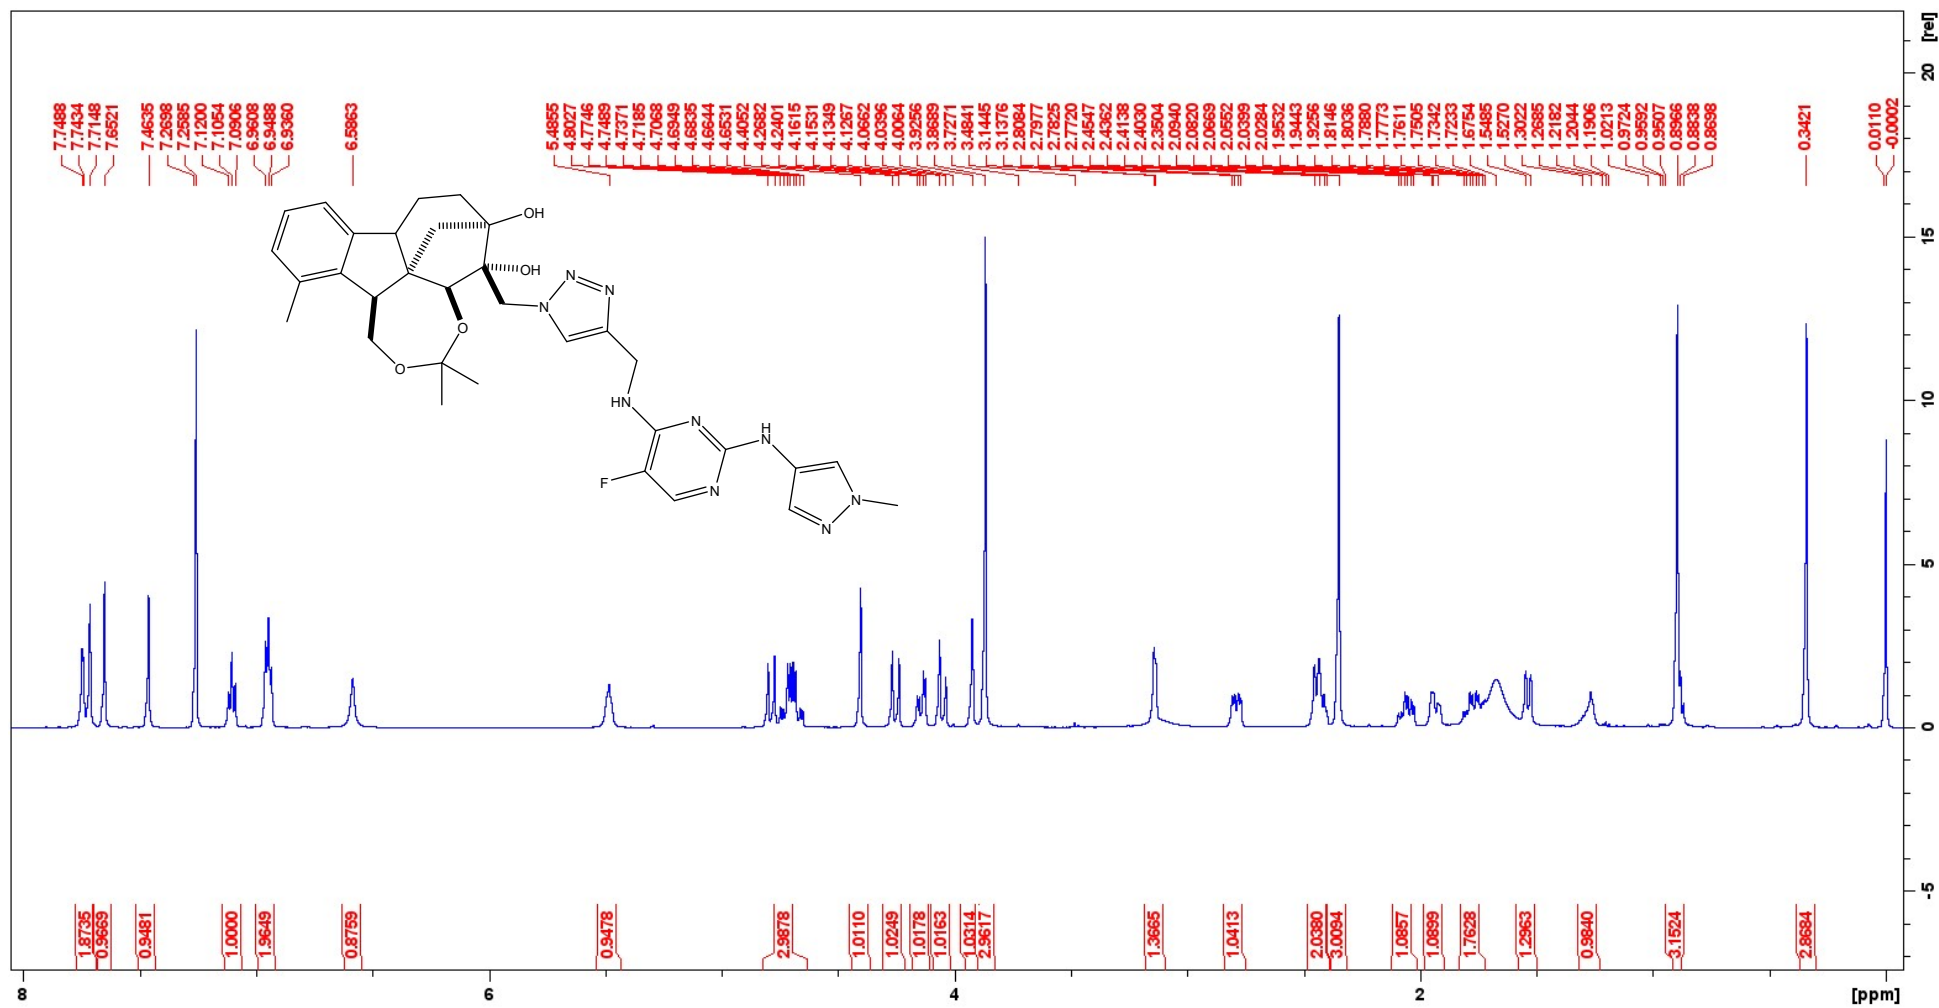

<sup>13</sup>C{<sup>1</sup>H} J-MOD NMR (125 MHz) of (4a*S*,4a<sup>1</sup>*R*,5*R*,6*S*,12*bS*)-5-((4-(((5-Fluoro-2-((1-methyl-1*H*-pyrazol-4-yl)amino)pyrimidin-4-yl)amino)methyl)-1*H*-1,2,3-triazol-1-yl)methyl)-3,3,12-trimethyl-4a,5,7,8,8a,12*b*-hexahydro-4a,1,6-methanobenzo[2,3]azuleno[8,1-*de*][1,3]dioxepine-5,6(1*H*)-diol  
**30**

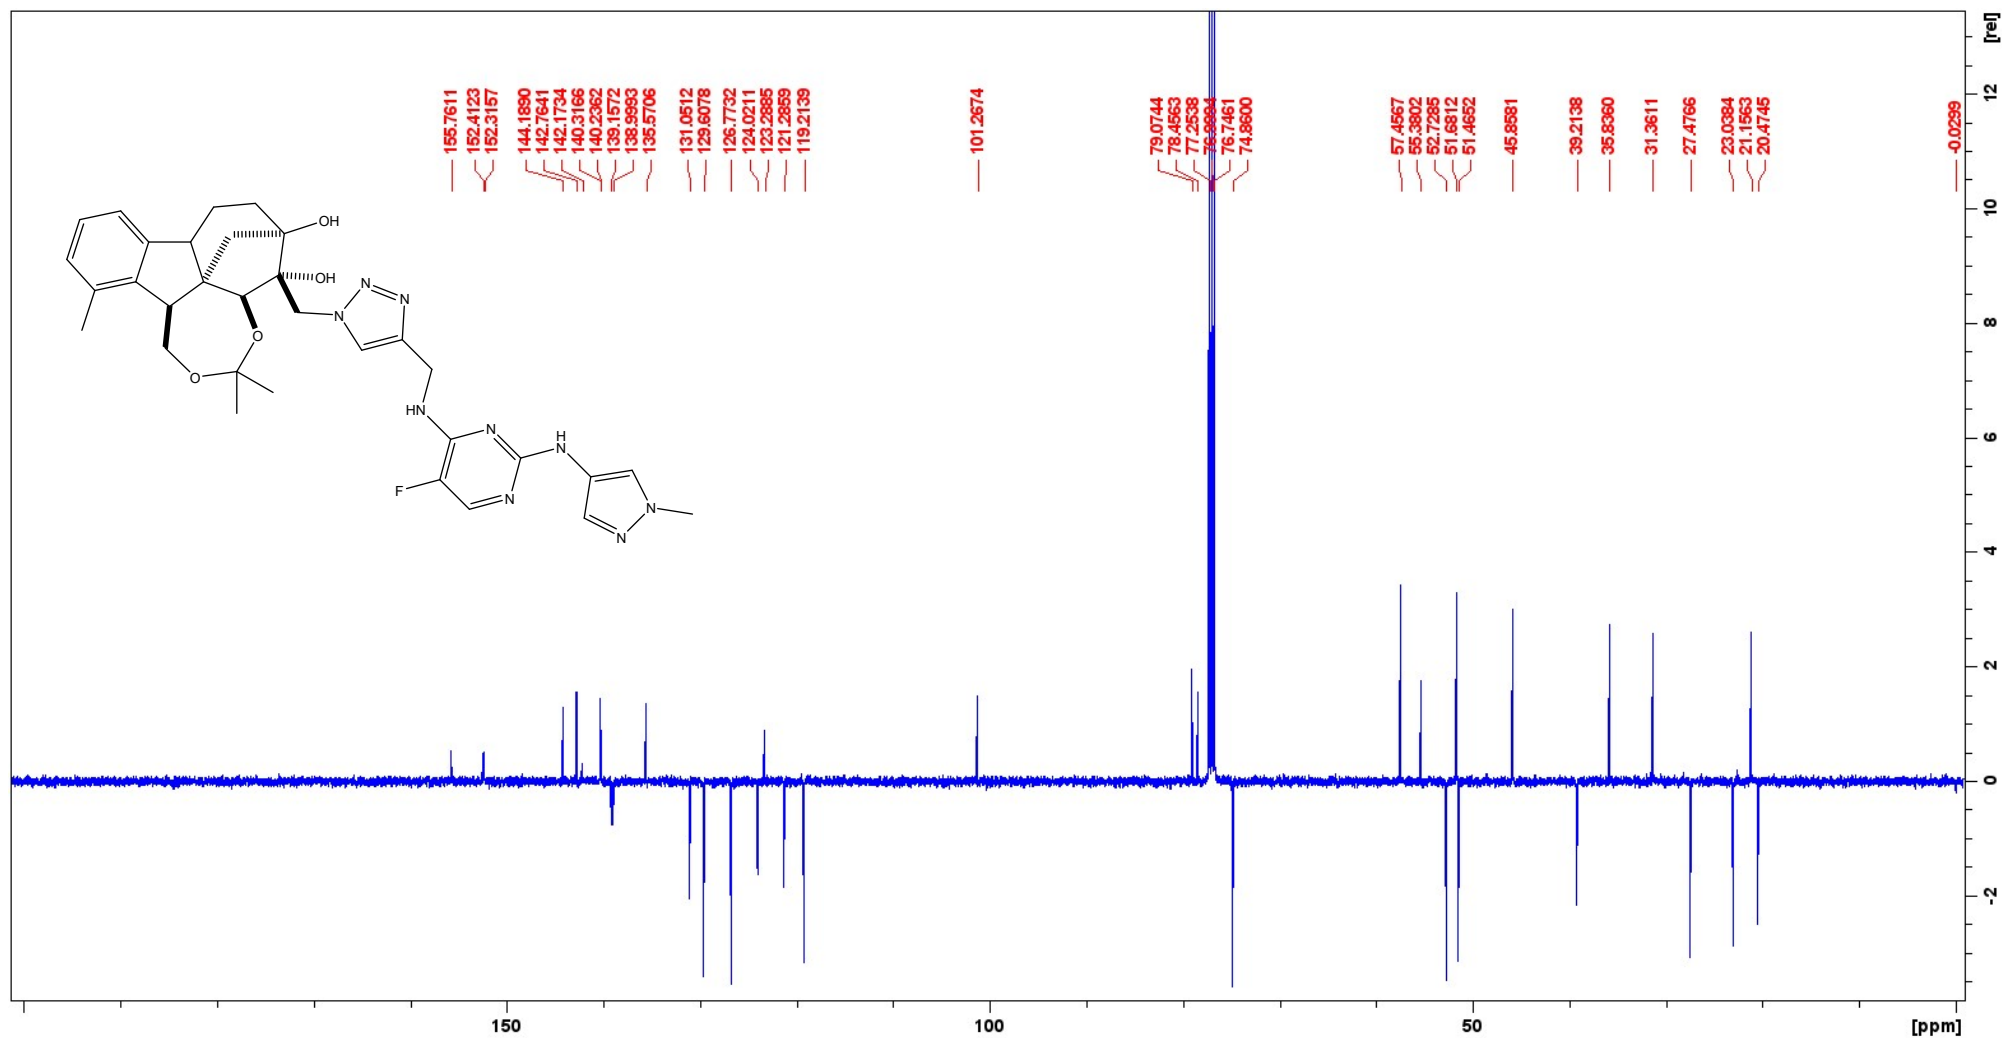

COSY of (4*S*,4*a*<sup>1</sup>*R*,5*R*,6*S*,12*b**S*)-5-((4-(((5-Fluoro-2-((1-methyl-1*H*-pyrazol-4-yl)amino)pyrimidin-4-yl)amino)methyl)-1*H*-1,2,3-triazol-1-yl)methyl)-3,3,12-trimethyl-4*a*,5,7,8,8*a*,12*b*-hexahydro-4*a*,1,6-methanobenzo[2,3]azuleno[8,1-*de*][1,3]dioxepine-5,6(1*H*)-diol **30**

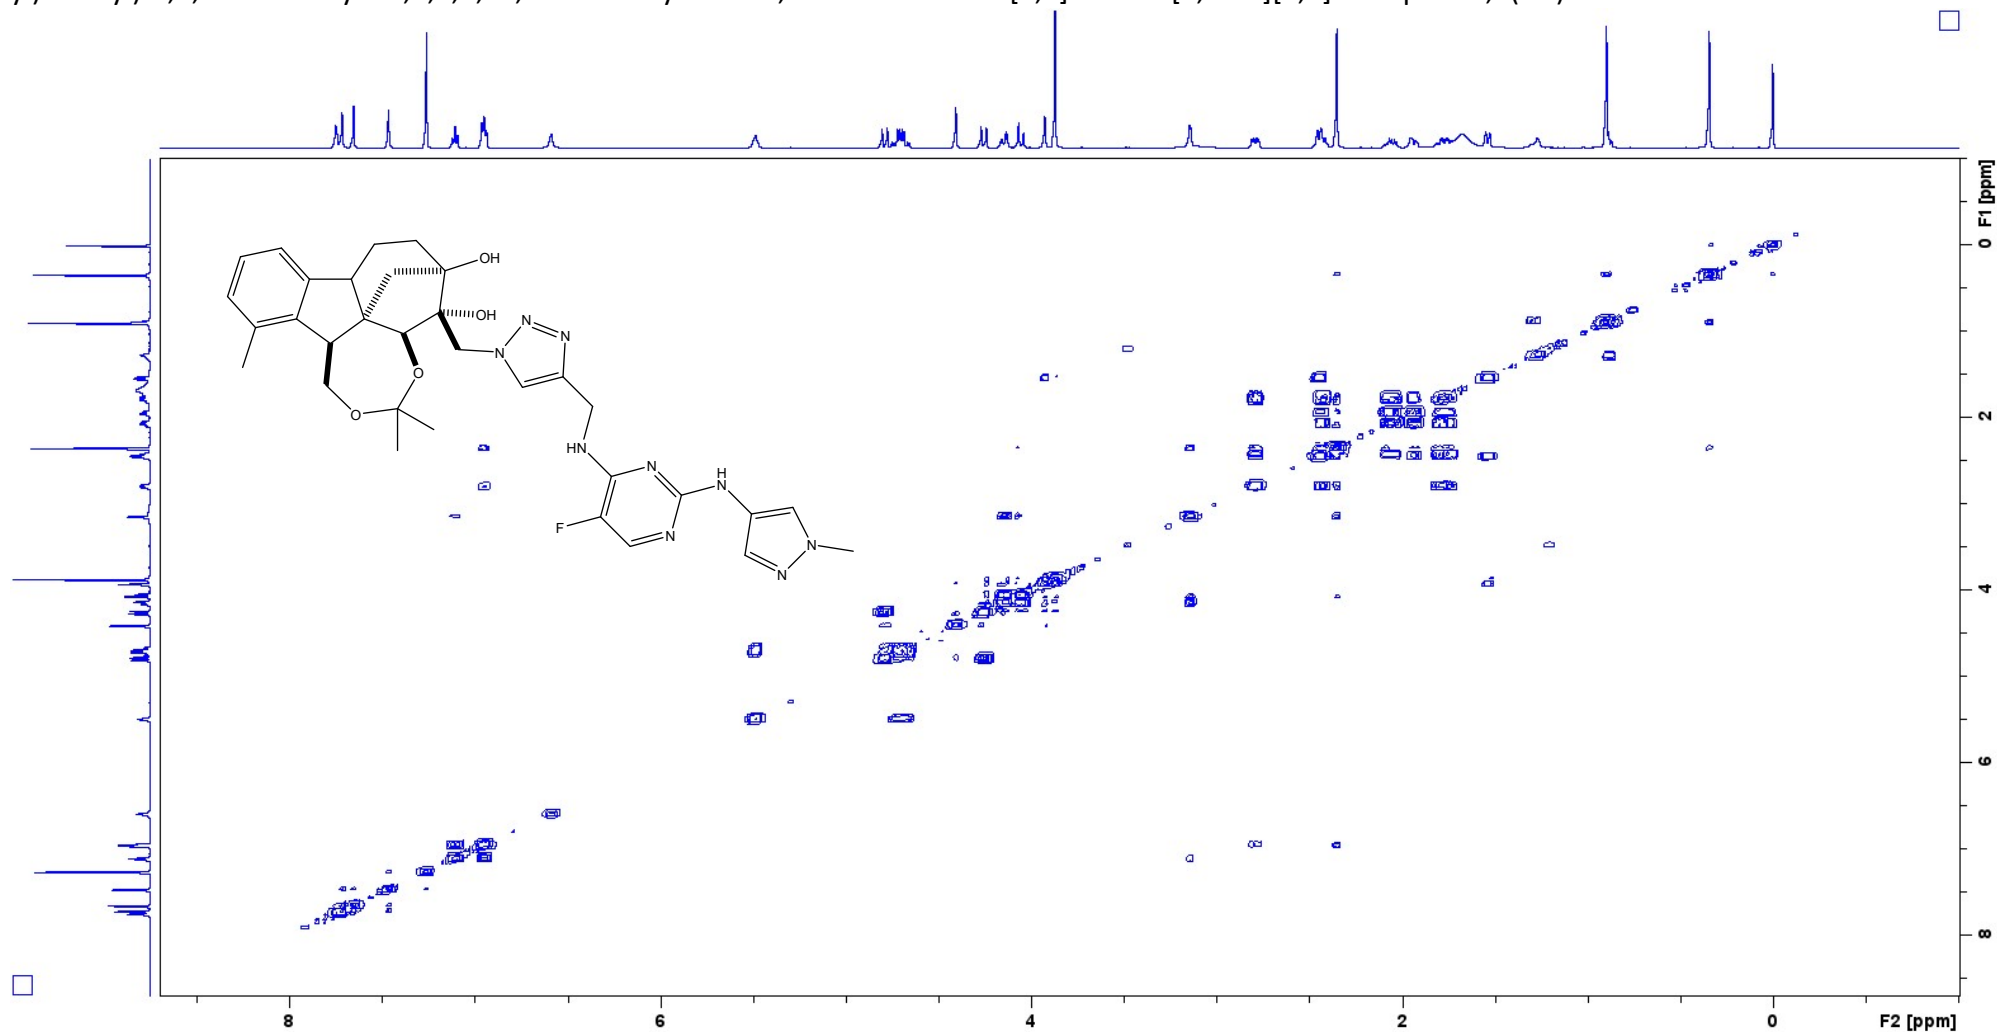

NOESY of (4*S*,4*a*<sup>1</sup>*R*,5*R*,6*S*,12*bS*)-5-((4-(((5-Fluoro-2-((1-methyl-1*H*-pyrazol-4-yl)amino)pyrimidin-4-yl)amino)methyl)-1*H*-1,2,3-triazol-1-yl)methyl)-3,3,12-trimethyl-4*a*,5,7,8,8*a*,12*b*-hexahydro-4*a*1,6-methanobenzo[2,3]azuleno[8,1-*de*][1,3]dioxepine-5,6(1*H*)-diol **30**

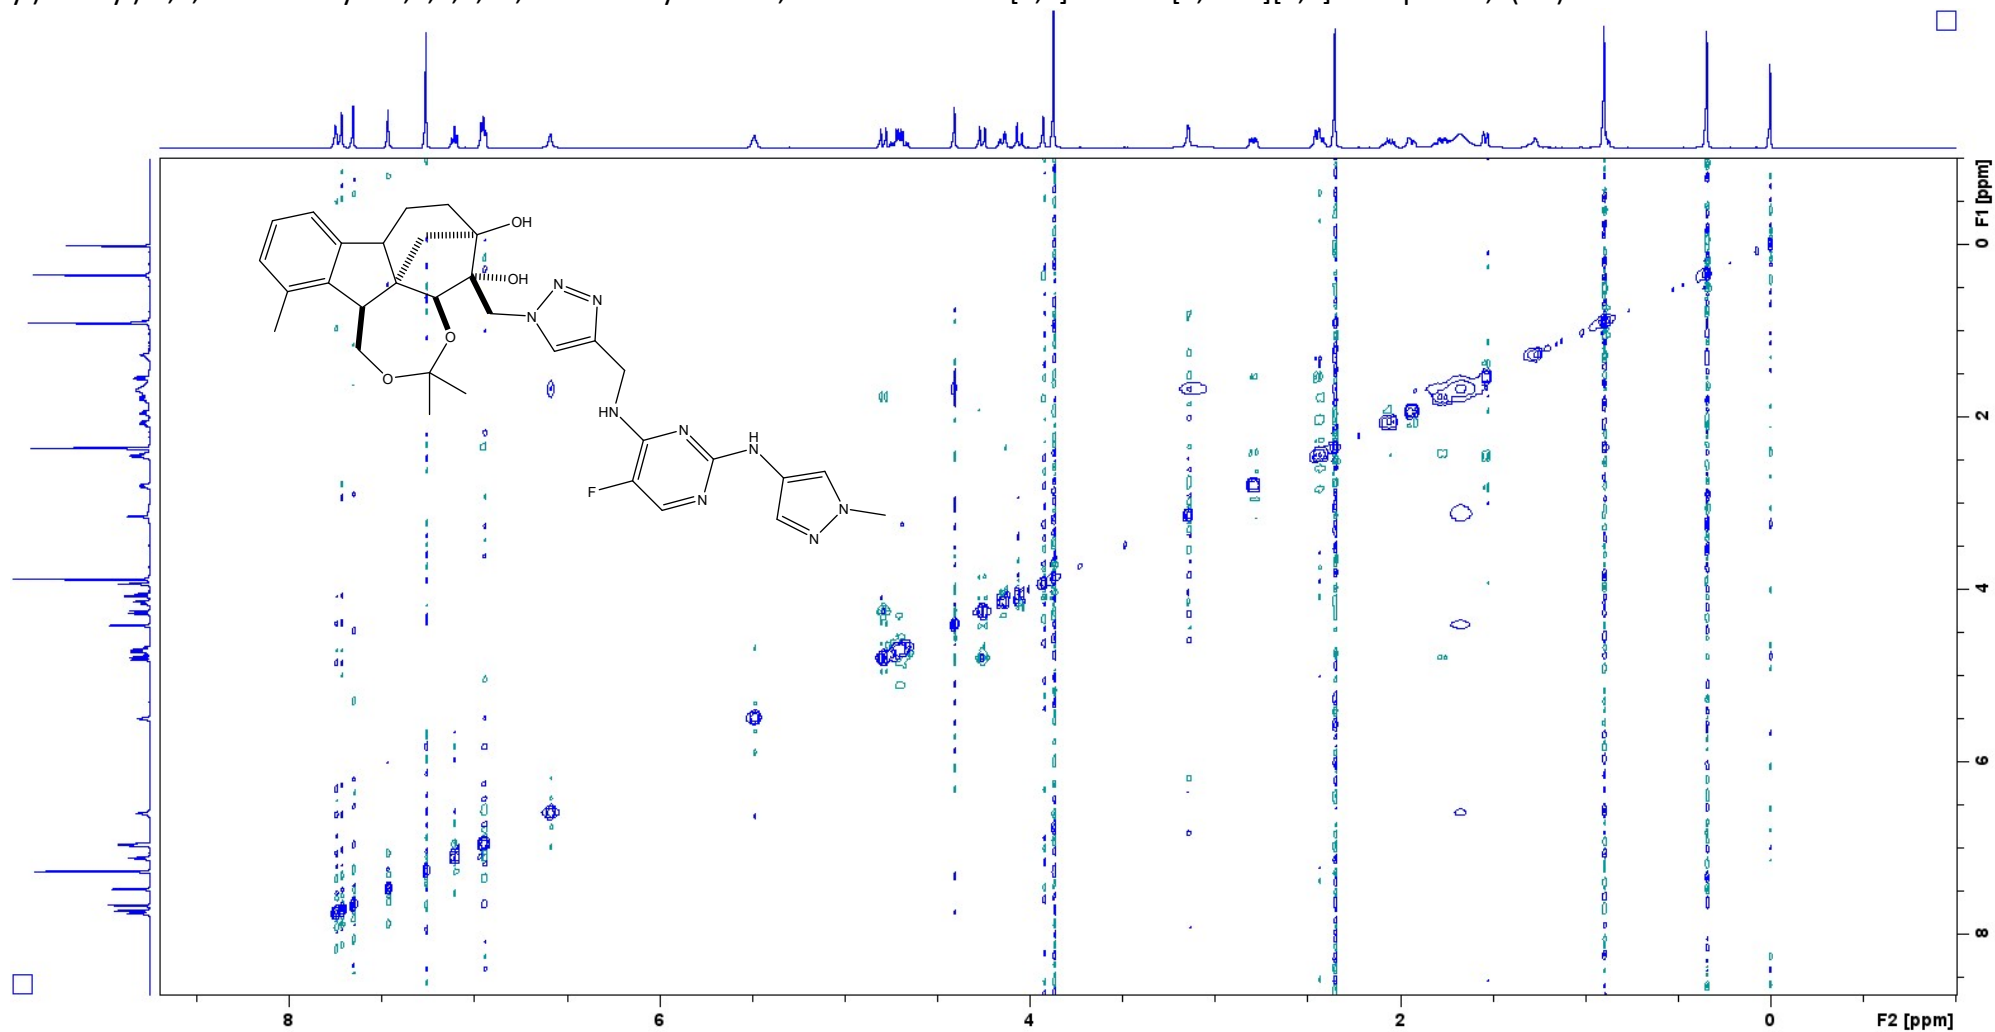



HSQC of (4*a*S,4*a*<sup>1</sup>*R*,5*R*,6*S*,12*b**S*)-5-(((5-Fluoro-2-((1-methyl-1*H*-pyrazol-4-yl)amino)pyrimidin-4-yl)amino)methyl)-1*H*-1,2,3-triazol-1-yl)methyl)-3,3,12-trimethyl-4*a*,5,7,8,8*a*,12*b*-hexahydro-4*a*1,6-methanobenzo[2,3]azuleno[8,1-*de*][1,3]dioxepine-5,6(1*H*)-diol **30**

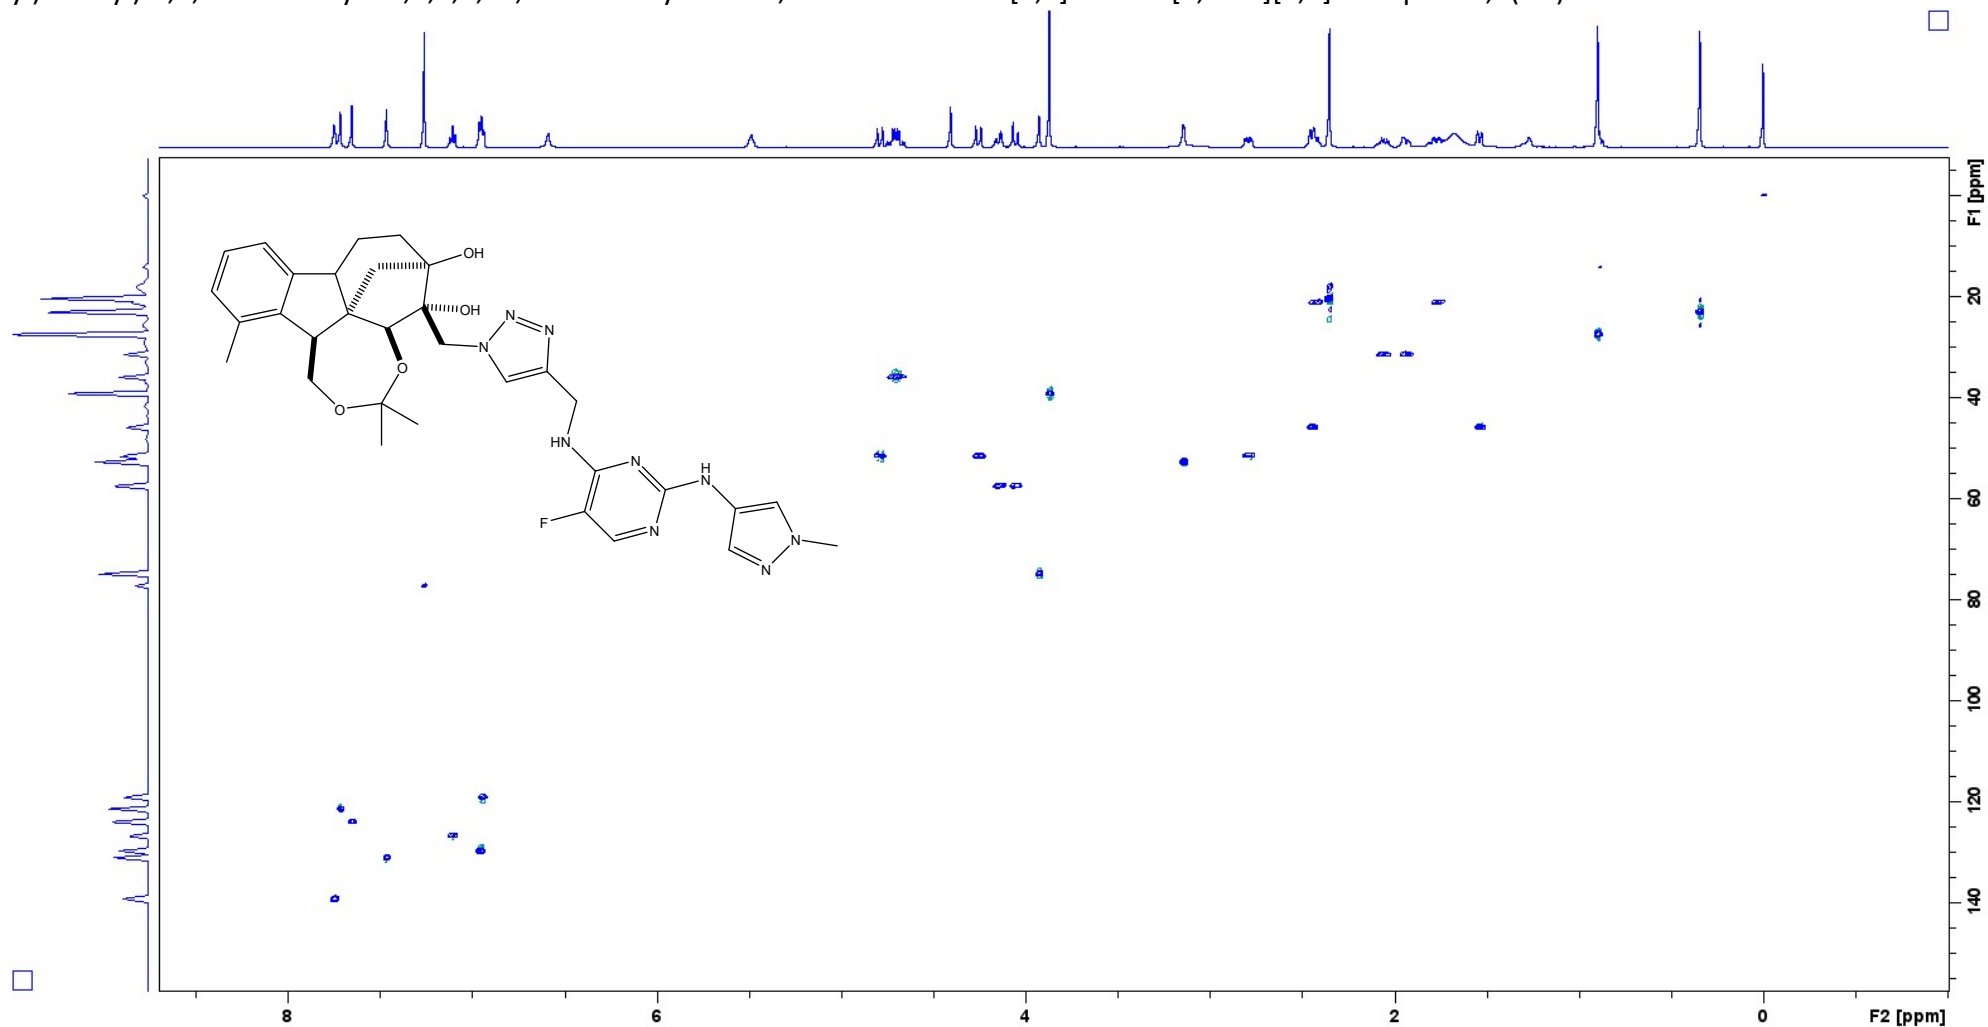

HMBC of (4*a*S,4*a*<sup>1</sup>*R*,5*R*,6*S*,12*b**S*)-5-((4-(((5-Fluoro-2-((1-methyl-1*H*-pyrazol-4-yl)amino)pyrimidin-4-yl)amino)methyl)-1*H*-1,2,3-triazol-1-yl)methyl)-3,3,12-trimethyl-4*a*,5,7,8,8*a*,12*b*-hexahydro-4*a*1,6-methanobenzo[2,3]azuleno[8,1-*de*][1,3]dioxepine-5,6(1*H*)-diol **30**

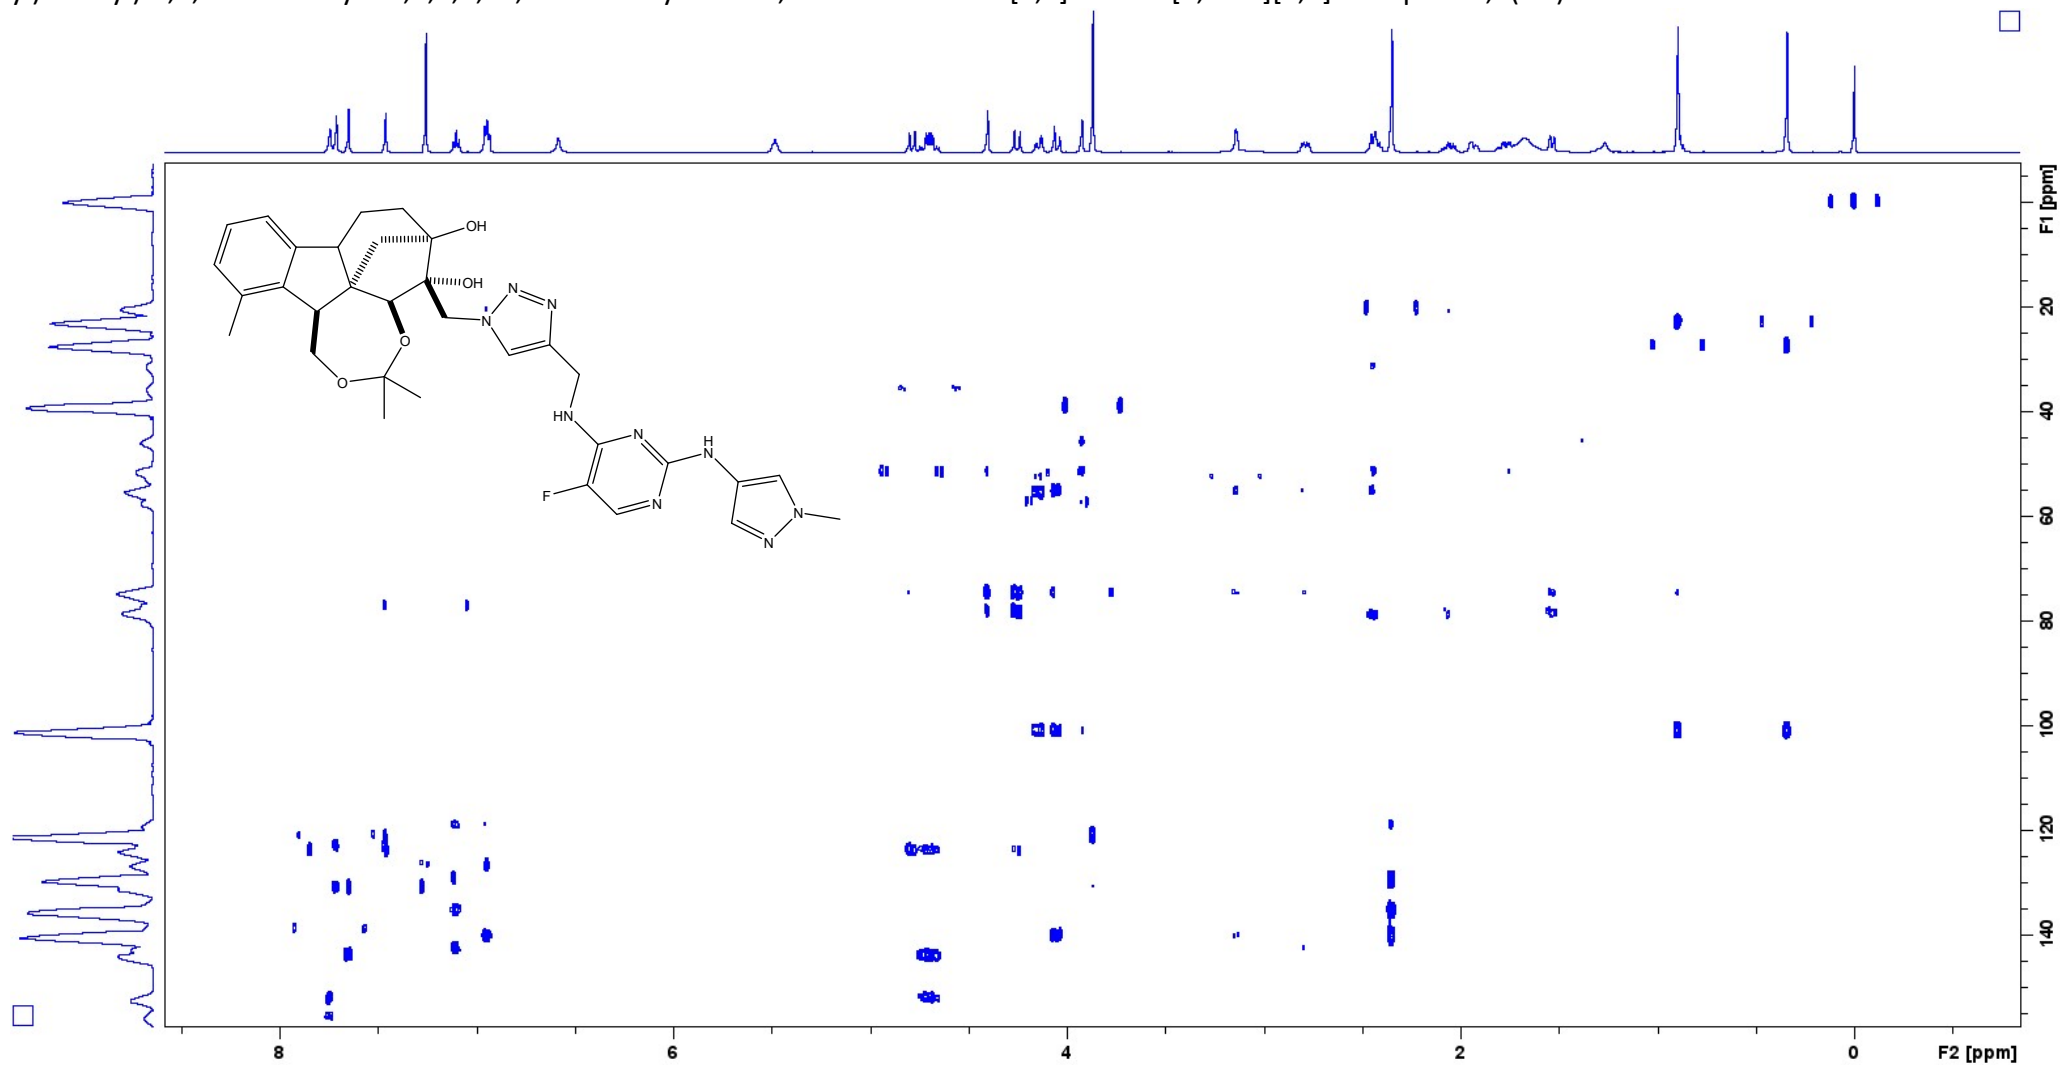

$^{19}\text{F}$  J-MOD NMR (470 MHz) of (4*aS*,4*a*<sup>1</sup>*R*,5*R*,6*S*,12*bS*)-5-((4-(((5-Fluoro-2-((1-methyl-1*H*-pyrazol-4-yl)amino)pyrimidin-4-yl)amino)methyl)-1*H*-1,2,3-triazol-1-yl)methyl)-3,3,12-trimethyl-4*a*,5,7,8,8*a*,12*b*-hexahydro-4*a*1,6-methanobenzo[2,3]azuleno[8,1-*de*][1,3]dioxepine-5,6(1*H*)-diol **30**

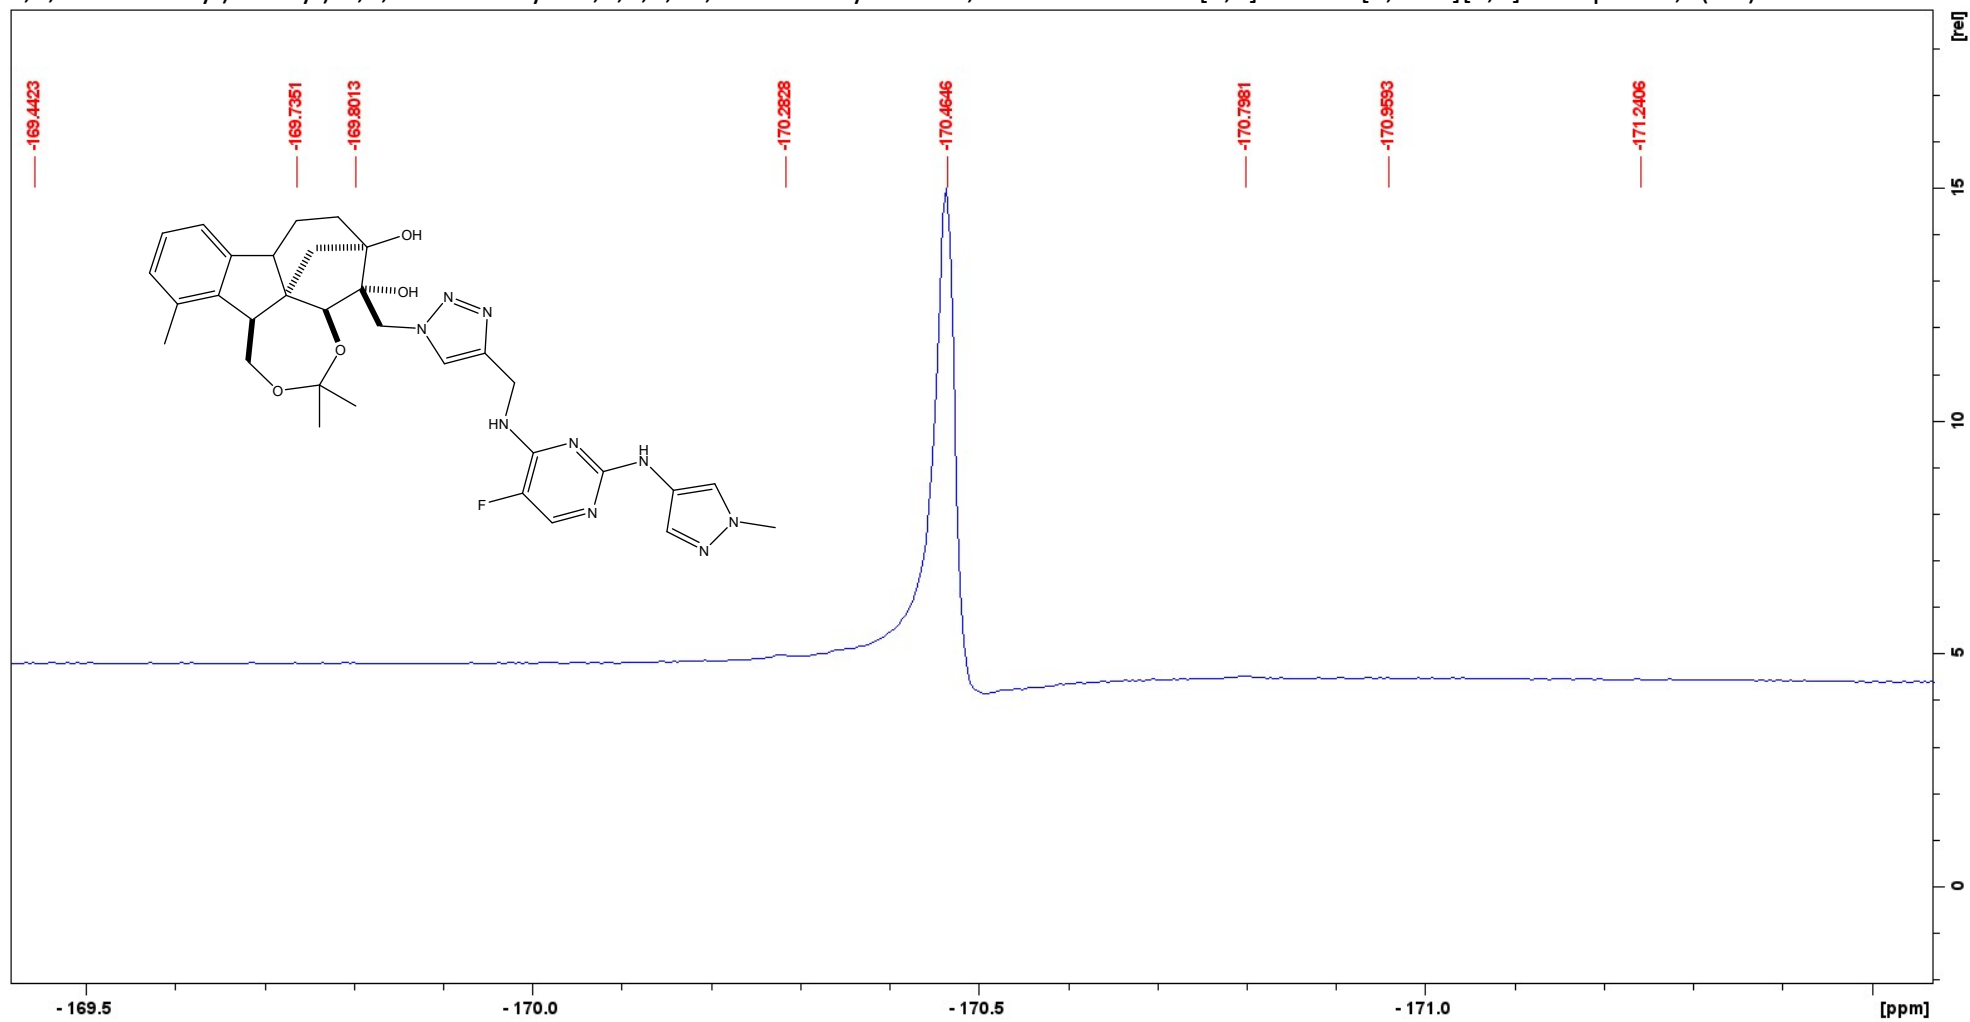

$^1\text{H-NMR}$  (500 MHz) of (4*a*S,4*a*<sup>1</sup>*R*,5*R*,6*S*,12*b*S)-5-((4-(((5-Chloro-2-((1-methyl-1*H*-pyrazol-4-yl)amino)pyrimidin-4-yl)amino)methyl)-1*H*-1,2,3-triazol-1-yl)methyl)-3,3,12-trimethyl-4*a*,5,7,8,8*a*,12*b*-hexahydro-4*a*1,6-methanobenzo[2,3]azuleno[8,1-*de*][1,3]dioxepine-5,6(1*H*)-diol **31**

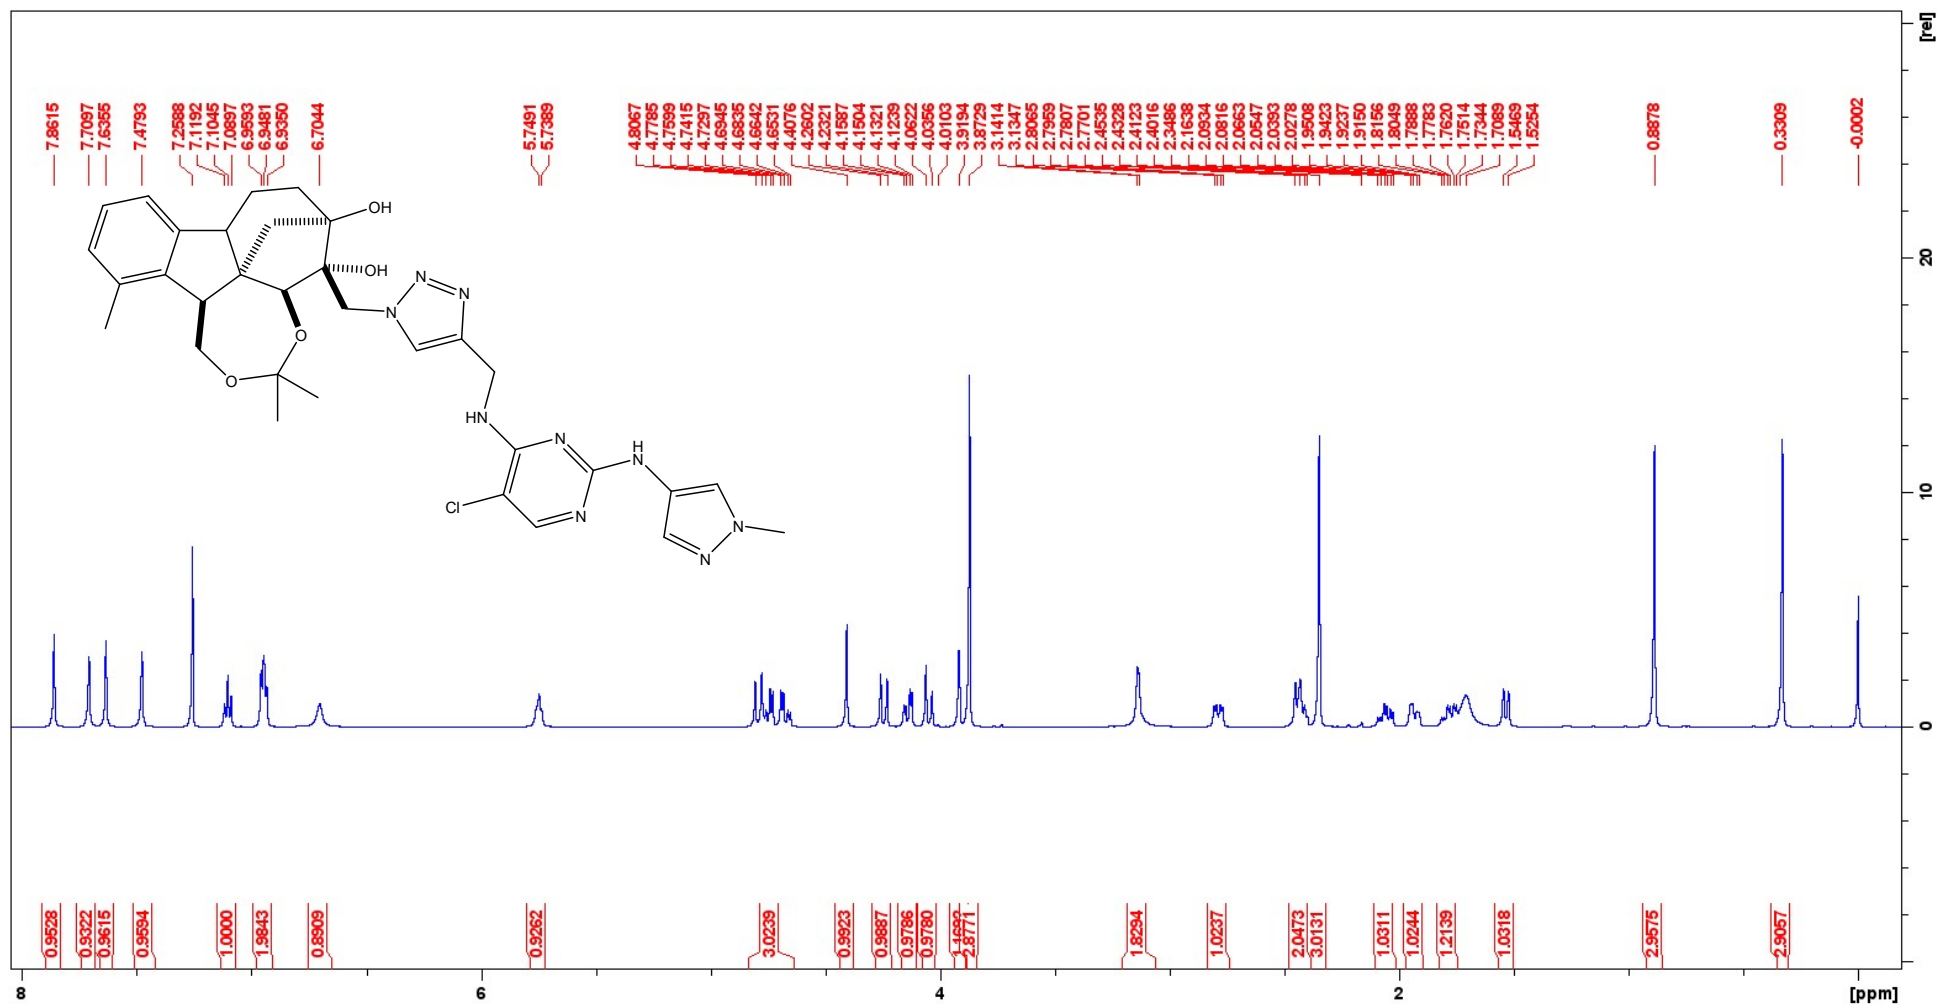

$^{13}\text{C}\{^1\text{H}\}$  J-MOD NMR (125 MHz) of (4a*S*,4a<sup>1</sup>*R*,5*R*,6*S*,12*bS*)-5-((4-(((5-Chloro-2-((1-methyl-1*H*-pyrazol-4-yl)amino)pyrimidin-4-yl)amino)methyl)-1*H*-1,2,3-triazol-1-yl)methyl)-3,3,12-trimethyl-4a,5,7,8,8a,12*b*-hexahydro-4a,1,6-methanobenzo[2,3]azuleno[8,1-*de*][1,3]dioxepine-5,6(1*H*)-diol  
**31**

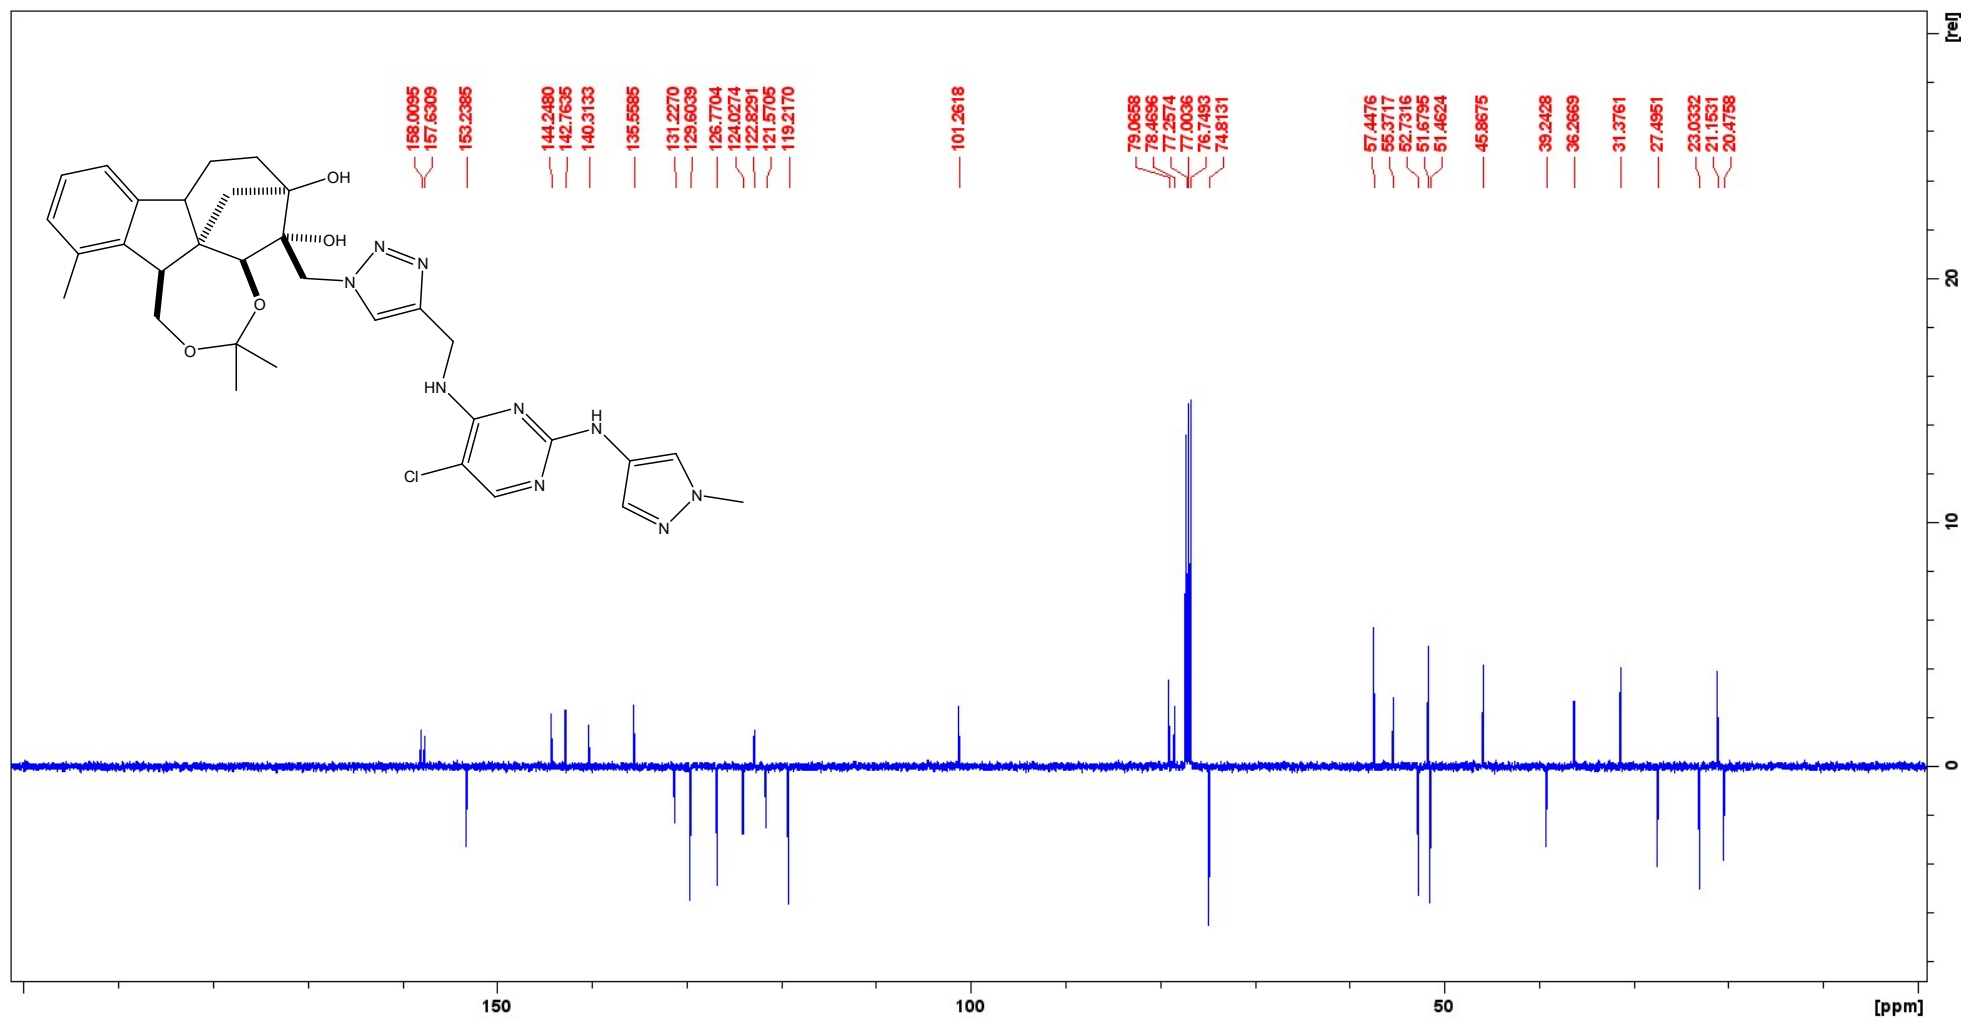

COSY of (4*a**S*,4*a*<sup>1</sup>*R*,5*R*,6*S*,12*b**S*)-5-((4-(((5-Chloro-2-((1-methyl-1*H*-pyrazol-4-yl)amino)pyrimidin-4-yl)amino)methyl)-1*H*-1,2,3-triazol-1-yl)methyl)-3,3,12-trimethyl-4*a*,5,7,8,8*a*,12*b*-hexahydro-4*a*1,6-methanobenzo[2,3]azuleno[8,1-*de*][1,3]dioxepine-5,6(1*H*)-diol **31**

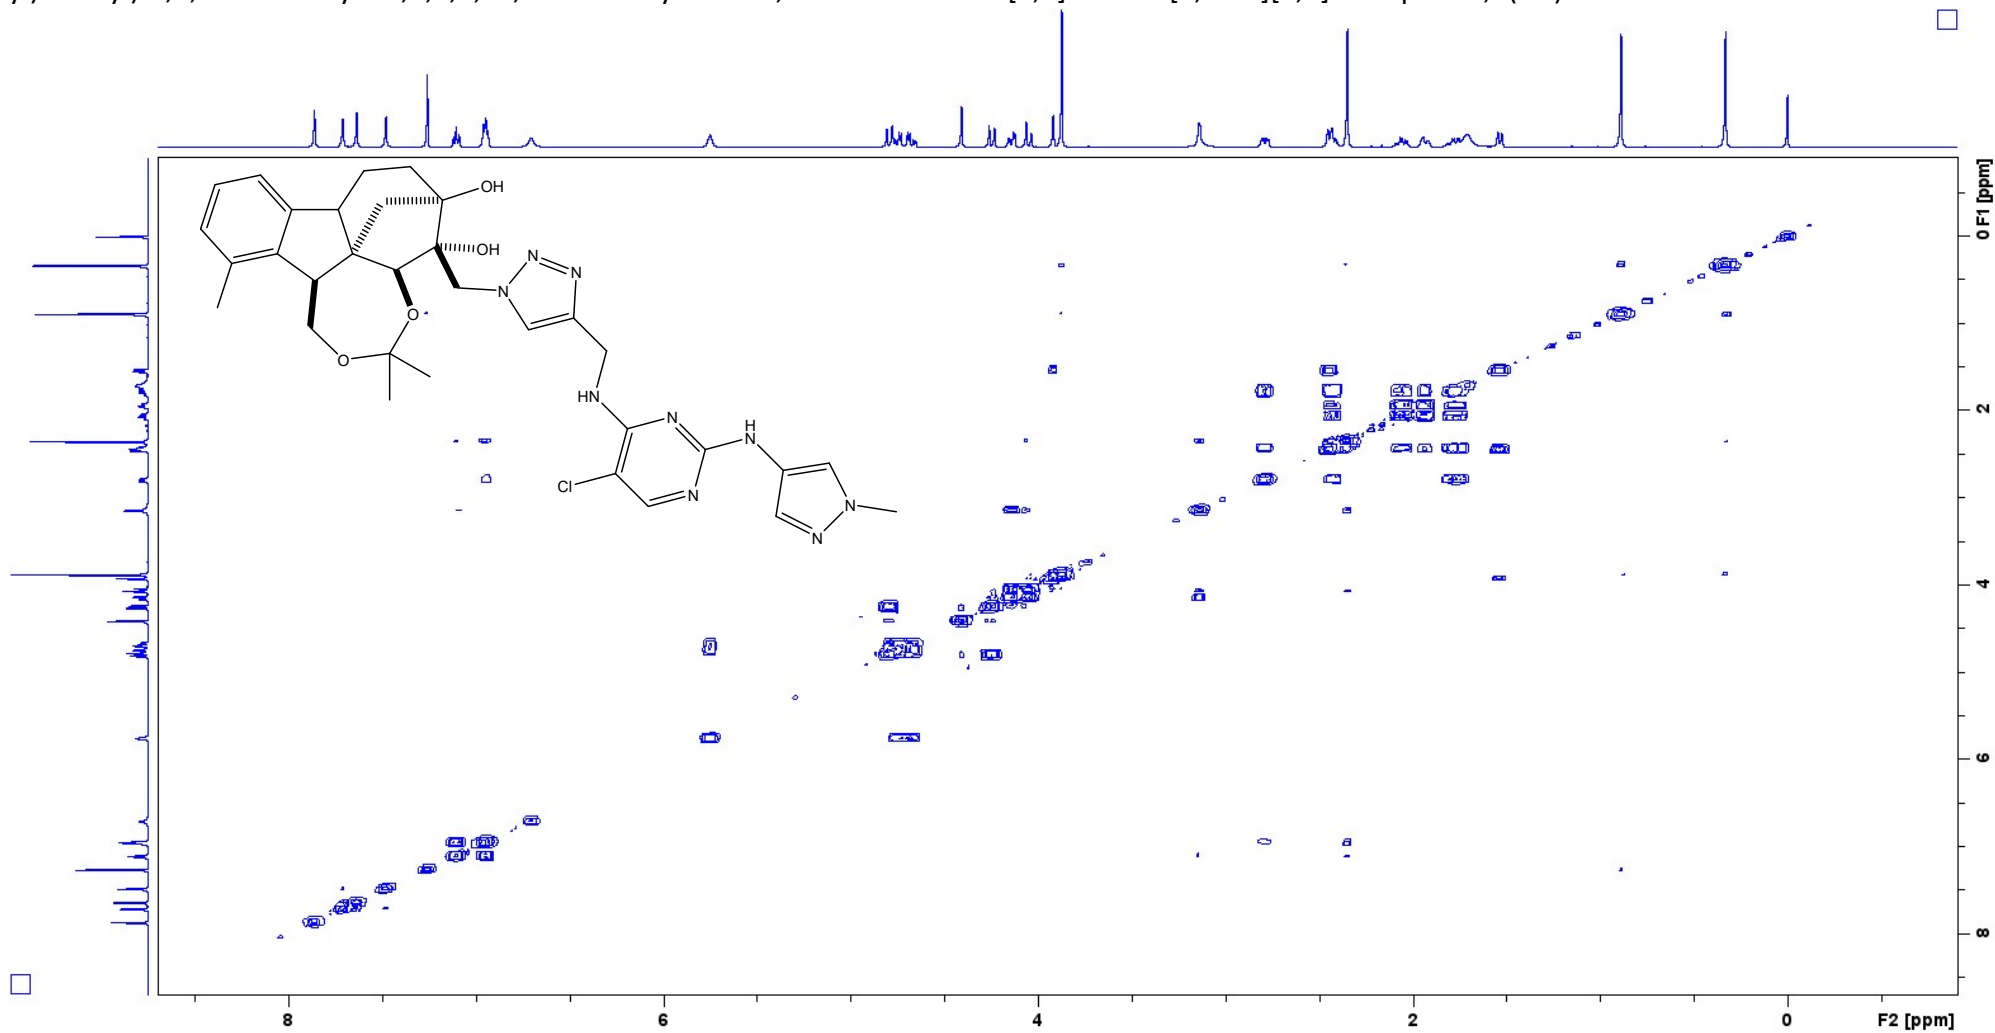

NOESY of (4*S*,4*a*<sup>1</sup>*R*,5*R*,6*S*,12*bS*)-5-((4-(((5-Chloro-2-((1-methyl-1*H*-pyrazol-4-yl)amino)pyrimidin-4-yl)amino)methyl)-1*H*-1,2,3-triazol-1-yl)methyl)-3,3,12-trimethyl-4*a*,5,7,8,8*a*,12*b*-hexahydro-4*a*1,6-methanobenzo[2,3]azuleno[8,1-*de*][1,3]dioxepine-5,6(1*H*)-diol **31**

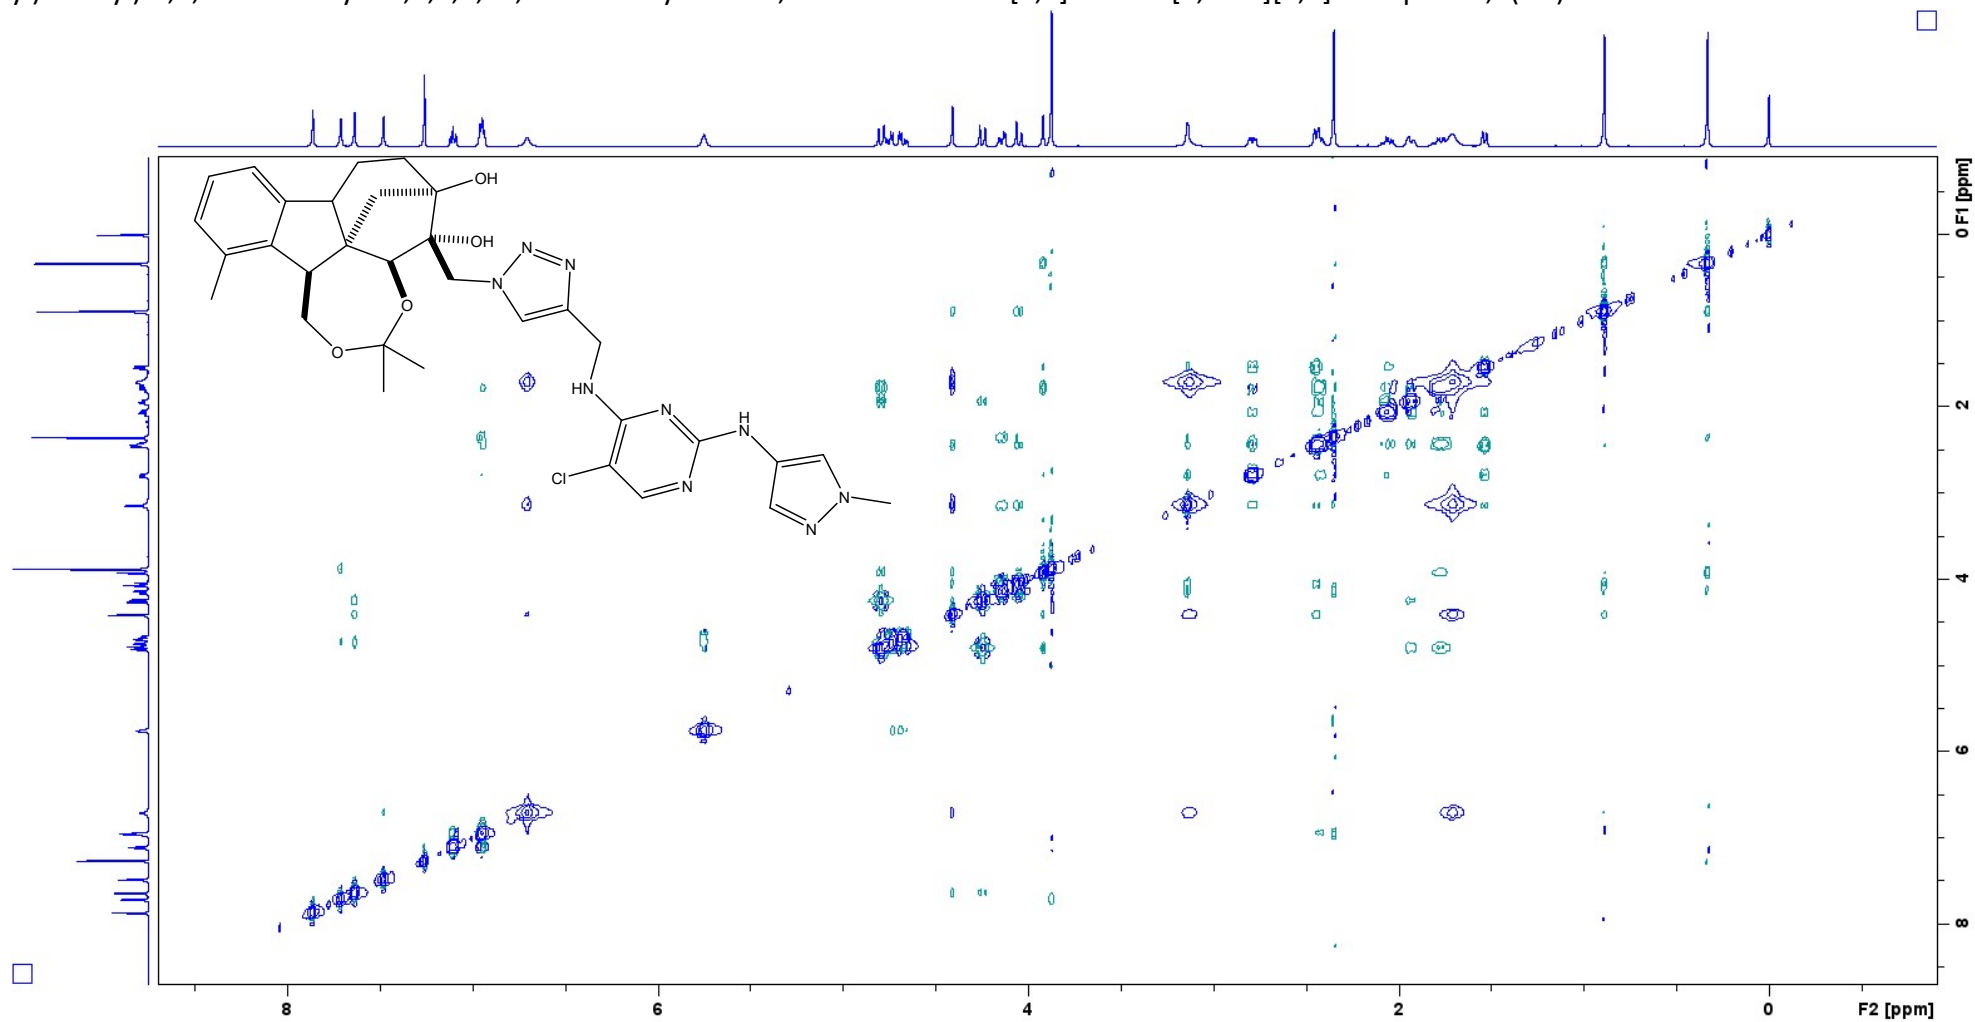

HSQC of (4*a*S,4*a*<sup>1</sup>*R*,5*R*,6*S*,12*b**S*)-5-((4-(((5-Chloro-2-((1-methyl-1*H*-pyrazol-4-yl)amino)pyrimidin-4-yl)amino)methyl)-1*H*-1,2,3-triazol-1-yl)methyl)-3,3,12-trimethyl-4*a*,5,7,8,8*a*,12*b*-hexahydro-4*a*1,6-methanobenzo[2,3]azuleno[8,1-*de*][1,3]dioxepine-5,6(1*H*)-diol **31**

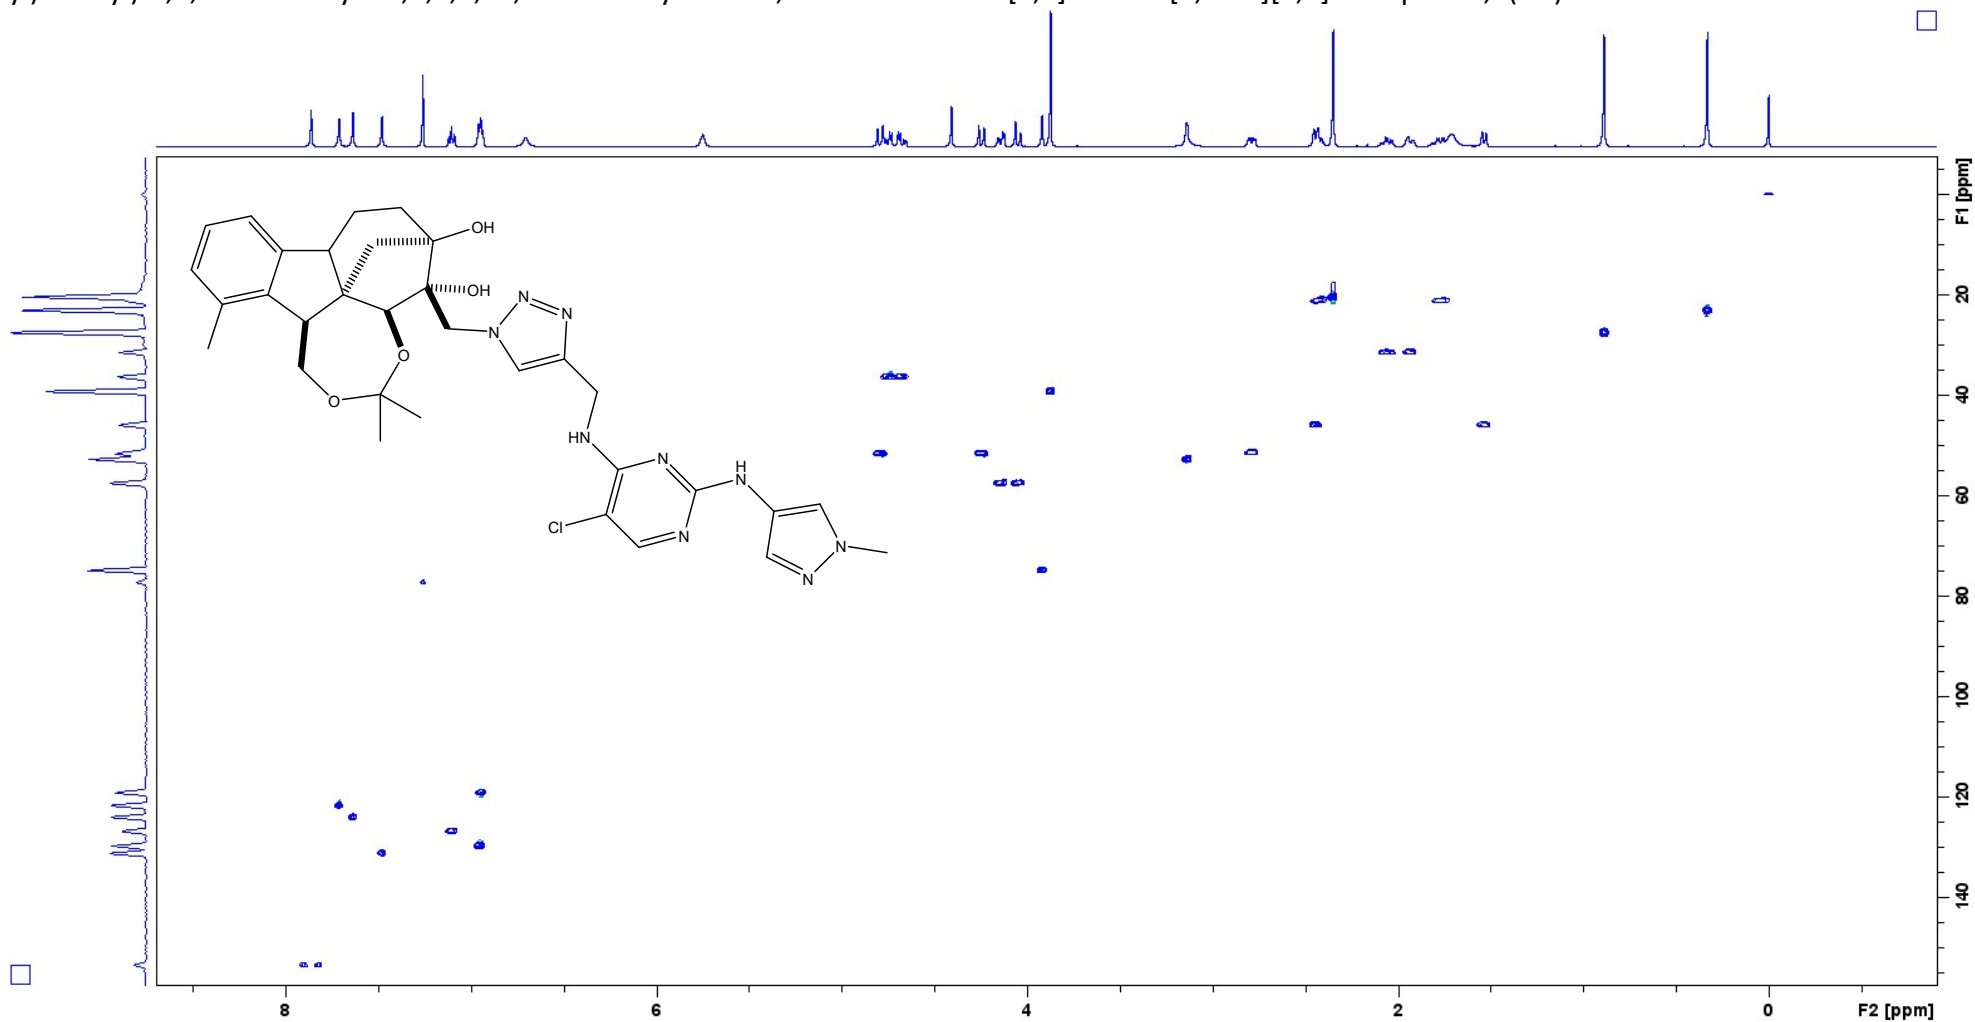



HMBC of (4*S*,4*a*<sup>1</sup>*R*,5*R*,6*S*,12*bS*)-5-((4-(((5-Chloro-2-((1-methyl-1*H*-pyrazol-4-yl)amino)pyrimidin-4-yl)amino)methyl)-1*H*-1,2,3-triazol-1-yl)methyl)-3,3,12-trimethyl-4*a*,5,7,8,8*a*,12*b*-hexahydro-4*a*1,6-methanobenzo[2,3]azuleno[8,1-*de*][1,3]dioxepine-5,6(1*H*)-diol **31**

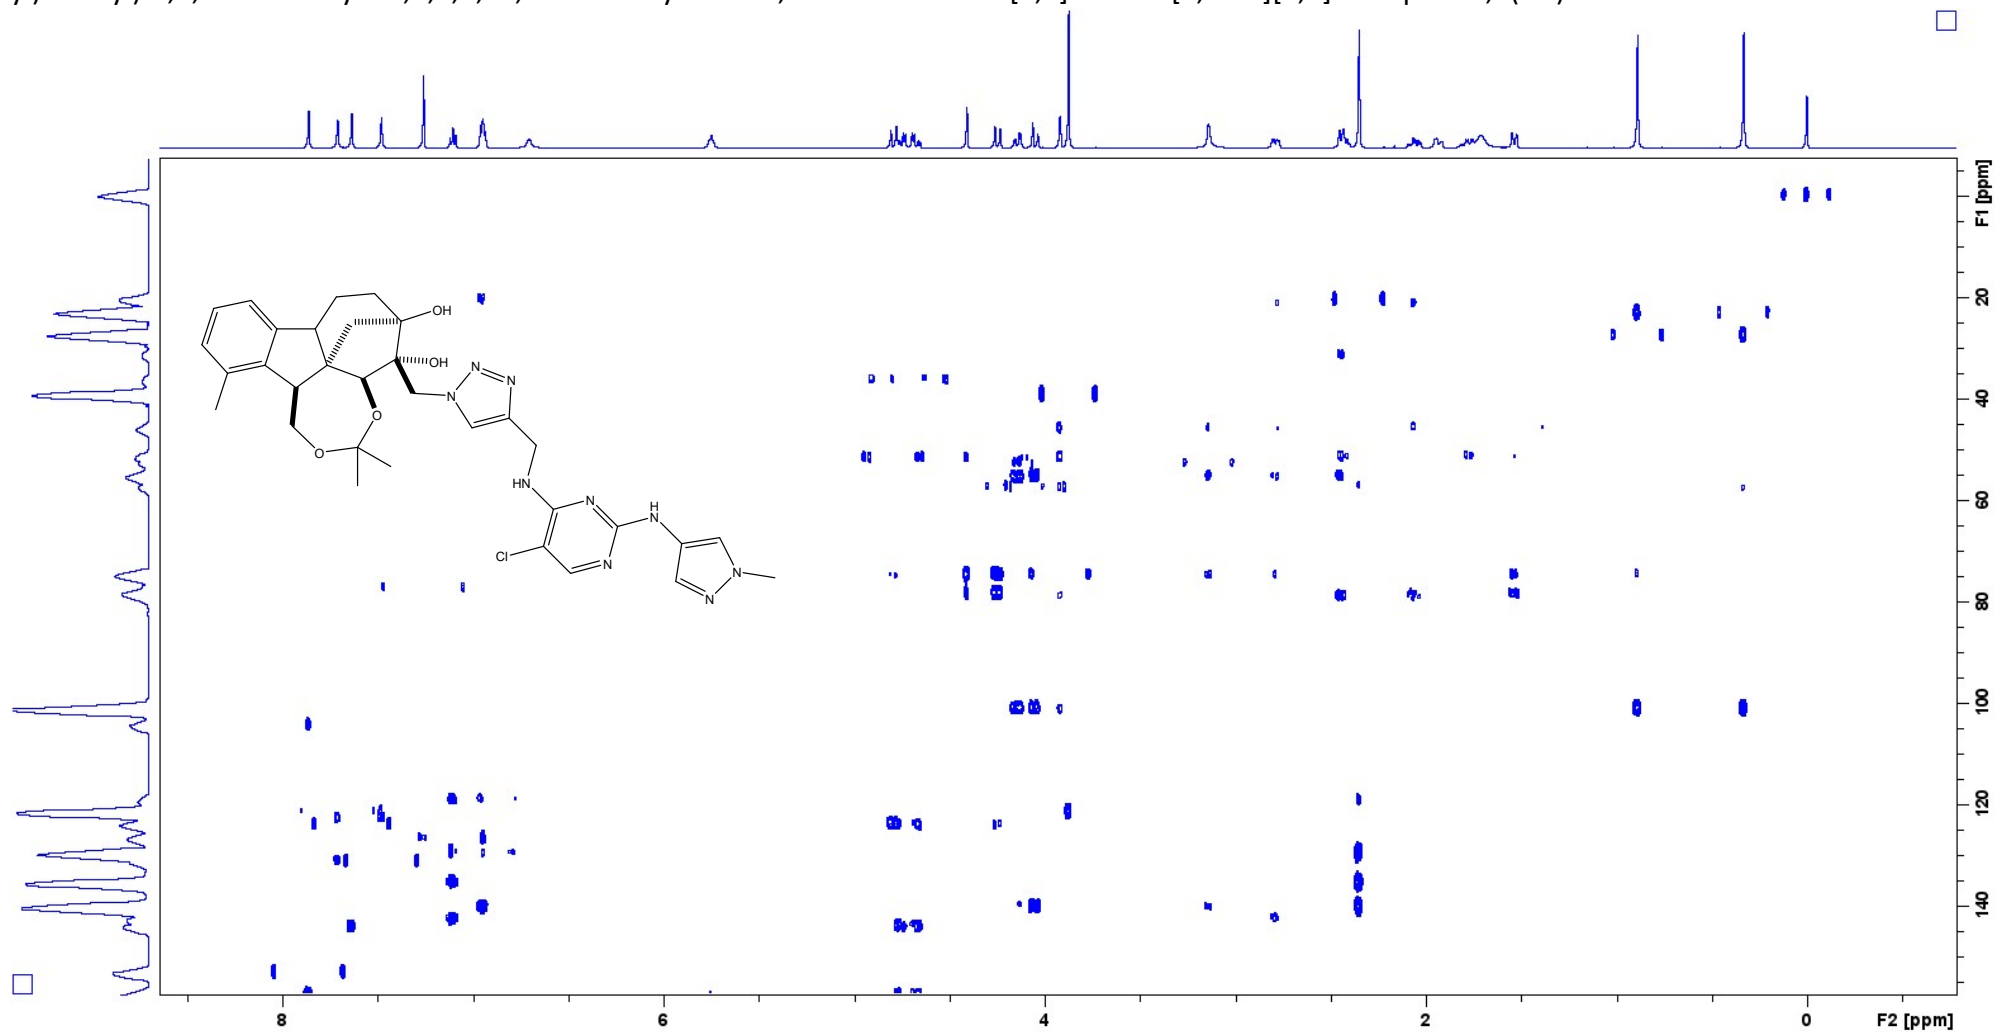

$^1\text{H-NMR}$  (500 MHz) of (4*S*,4*a*<sup>1*R*</sup>,5*R*,6*S*,12*bS*)-5-((4-(((5-Fluoro-2-((4-(trifluoromethyl)phenyl)amino)pyrimidin-4-yl)amino)methyl)-1*H*-1,2,3-triazol-1-yl)methyl)-3,3,12-trimethyl-4*a*,5,7,8,8*a*,12*b*-hexahydro-4*a*1,6-methanobenzo[2,3]azuleno[8,1-*de*][1,3]dioxepine-5,6(1*H*)-diol **32**

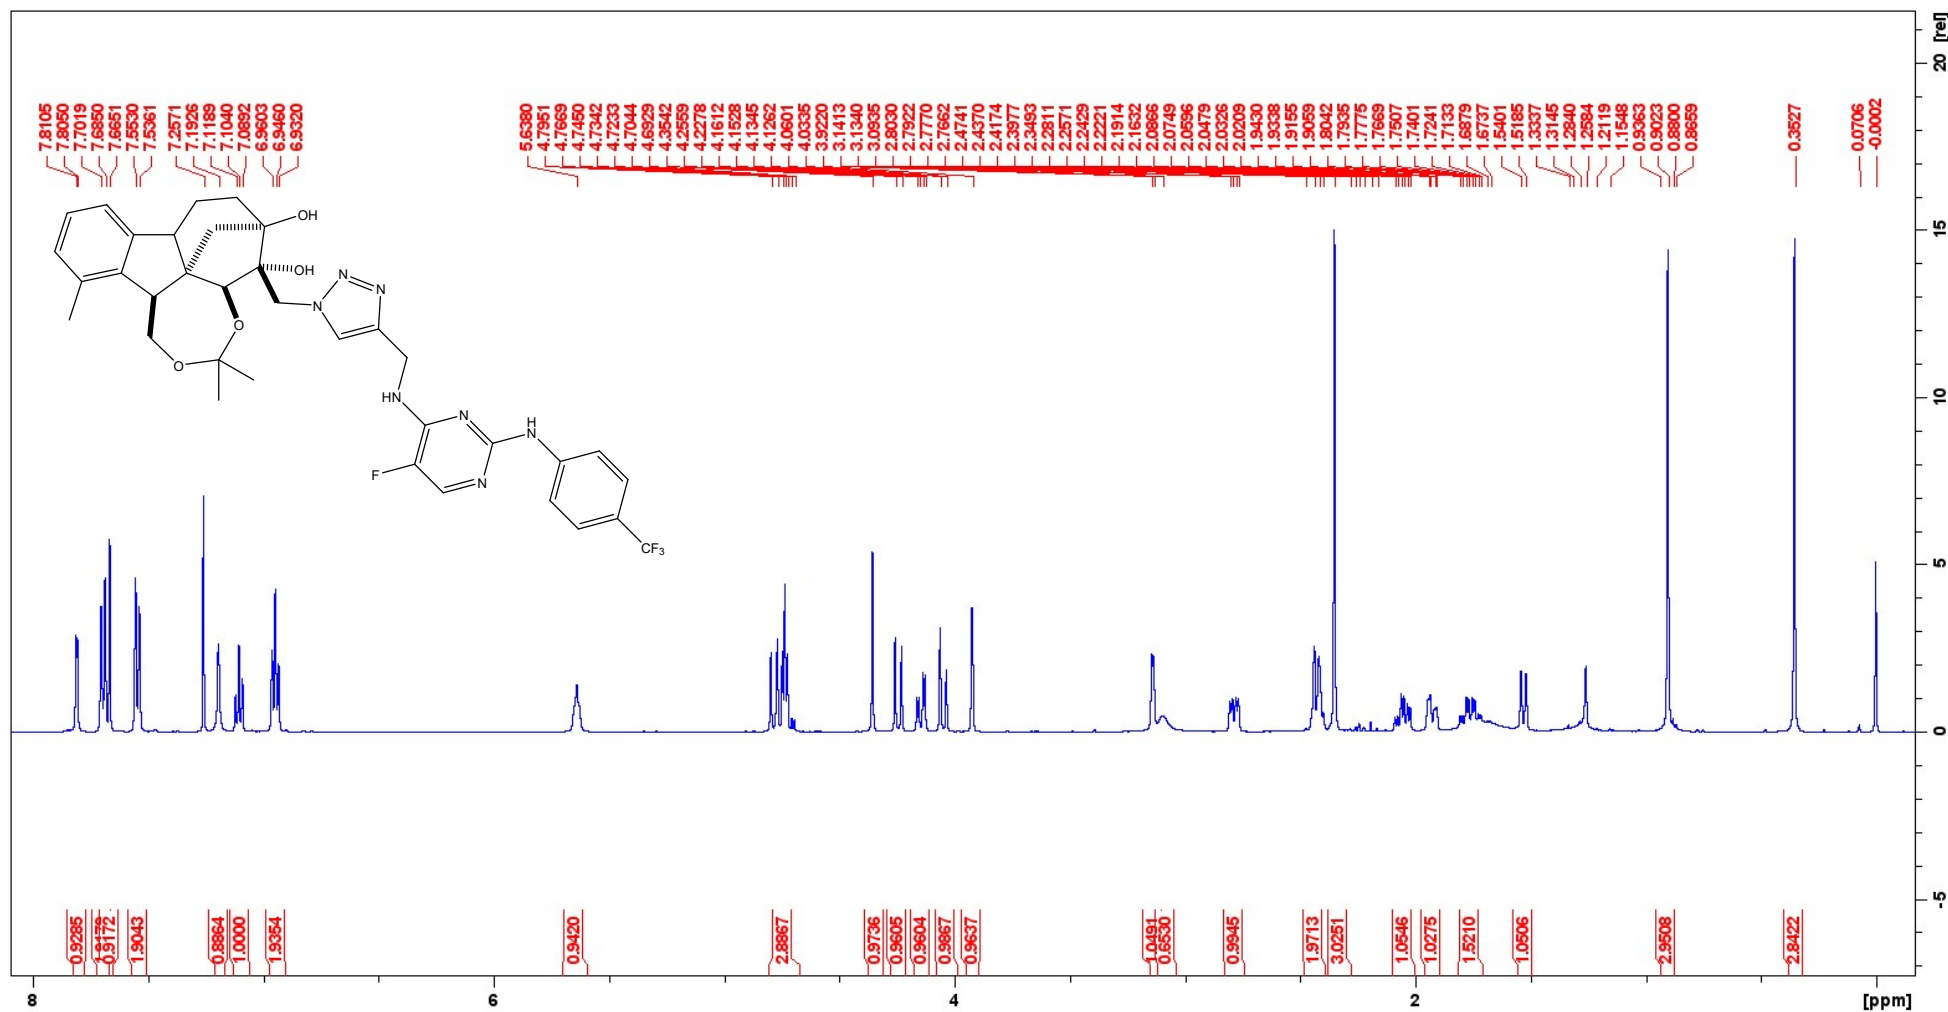

<sup>13</sup>C{<sup>1</sup>H} J-MOD NMR (125 MHz) of (4*a*S,4*a*<sup>1</sup>*R*,5*R*,6*S*,12*b*S)-5-(((5-Fluoro-2-((4-(trifluoromethyl)phenyl)amino)pyrimidin-4-yl)amino)methyl)-1*H*-1,2,3-triazol-1-yl)methyl)-3,3,12-trimethyl-4*a*,5,7,8,8*a*,12*b*-hexahydro-4*a*1,6-methanobenzo[2,3]azuleno[8,1-*de*][1,3]dioxepine-5,6(1*H*)-diol  
**32**

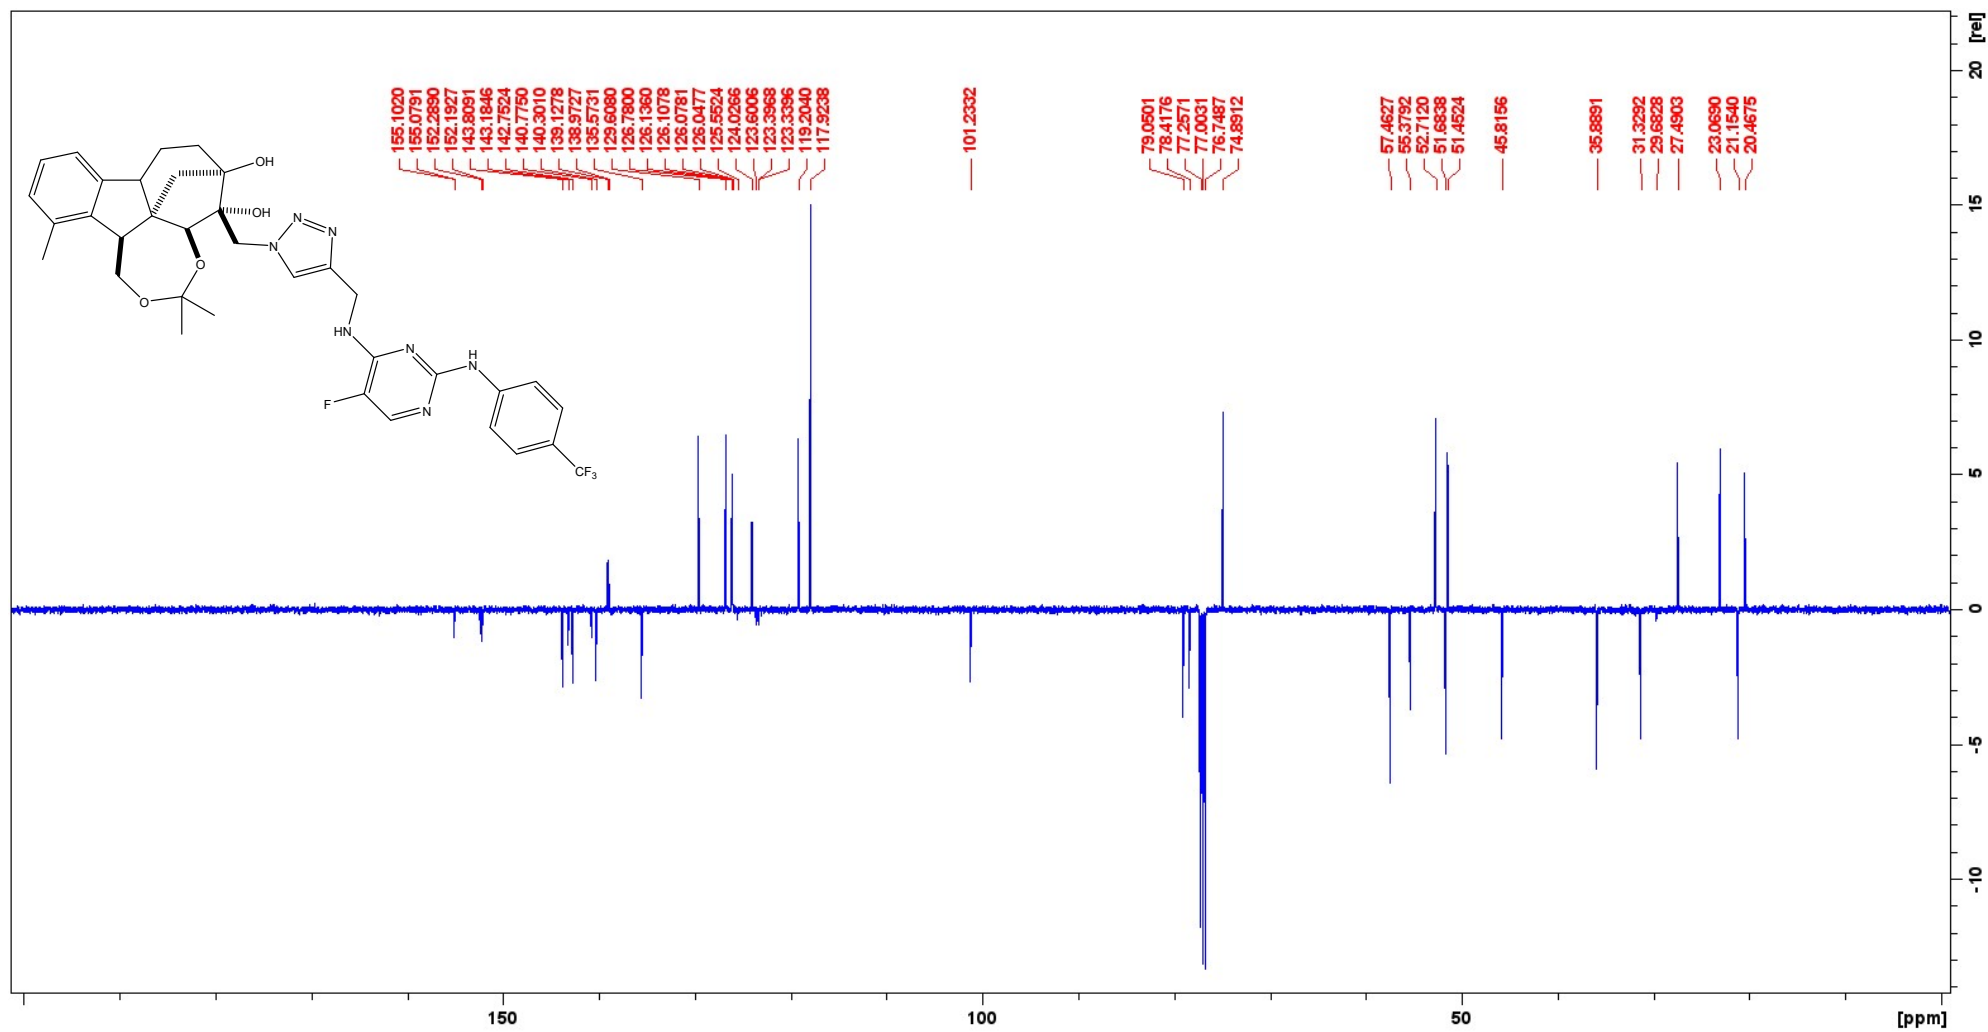

COSY of (4a*S*,4a<sup>1</sup>*R*,5*R*,6*S*,12*bS*)-5-((4-(((5-Fluoro-2-((4-(trifluoromethyl)phenyl)amino)pyrimidin-4-yl)amino)methyl)-1*H*-1,2,3-triazol-1-yl)methyl)-3,3,12-trimethyl-4a,5,7,8,8a,12*b*-hexahydro-4a,1,6-methanobenzo[2,3]azuleno[8,1-*de*][1,3]dioxepine-5,6(1*H*)-diol **32**

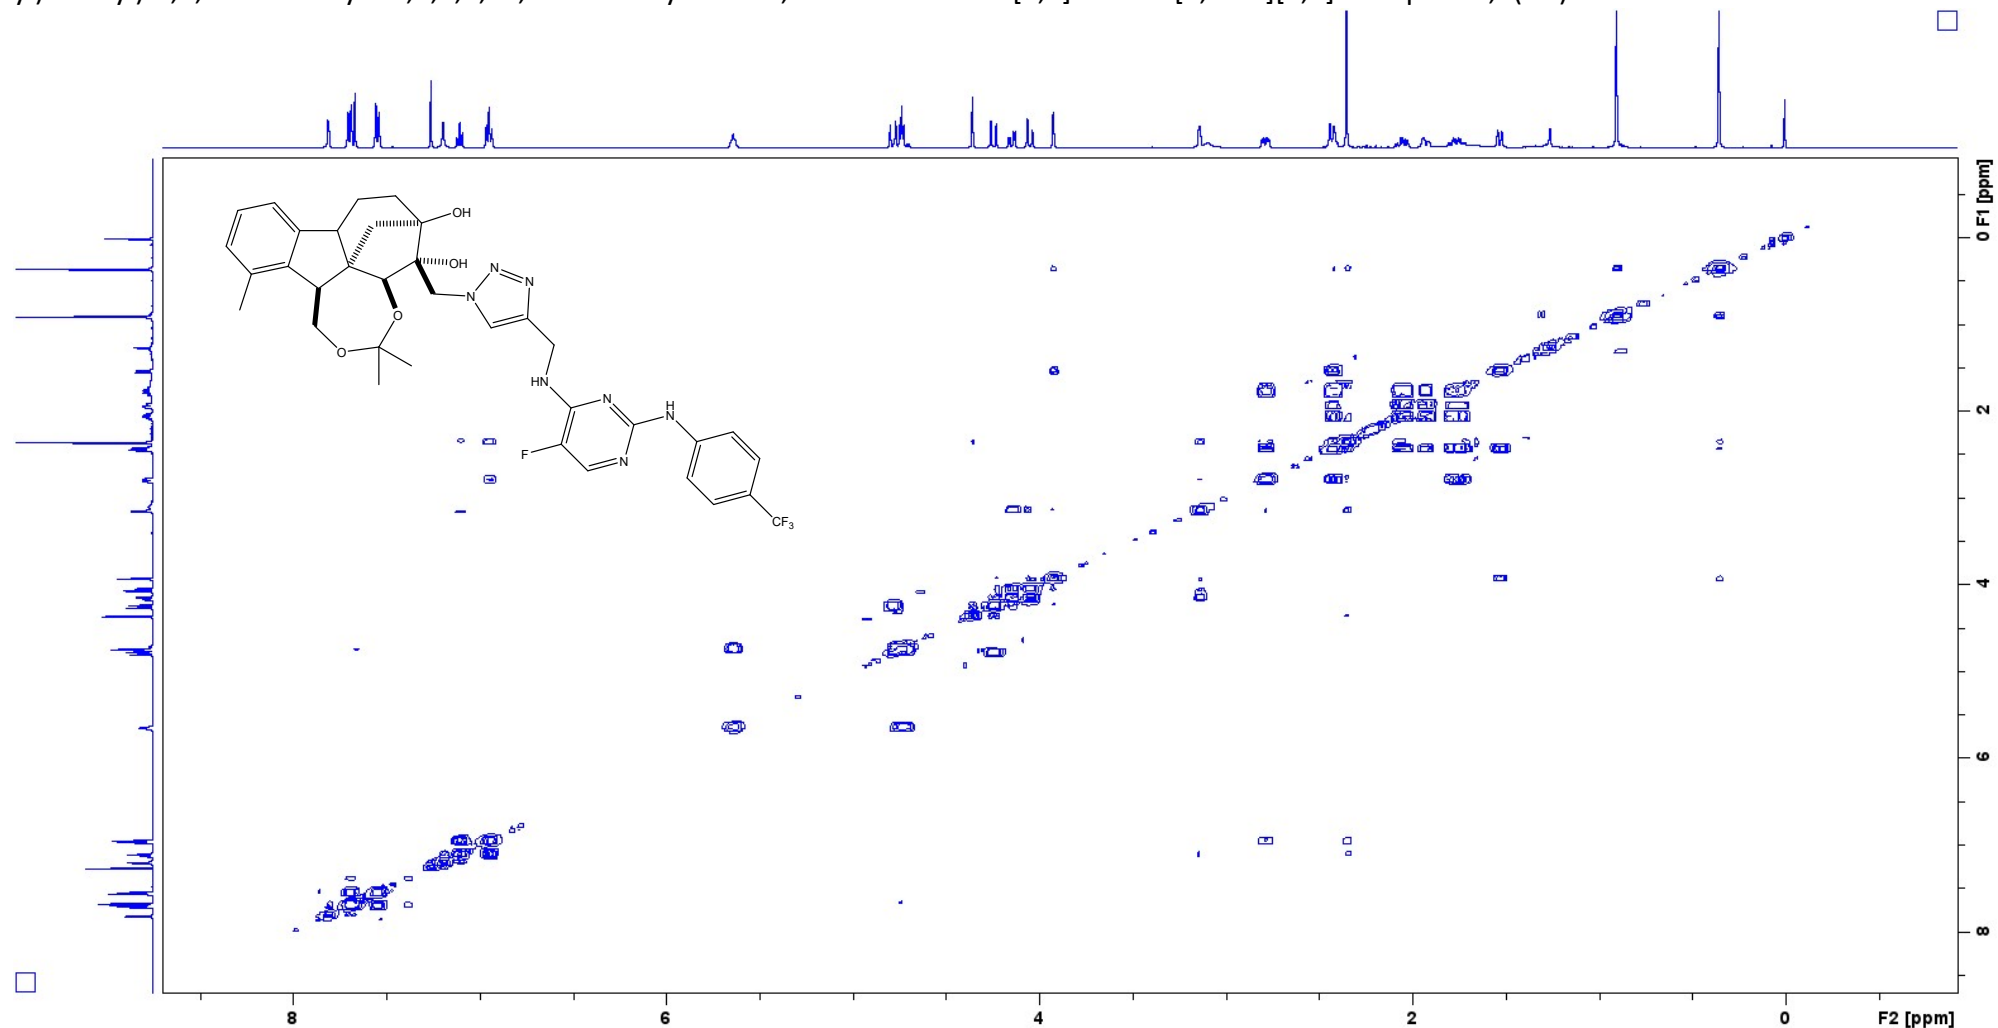

NOESY of (4*S*,4*a*<sup>1</sup>*R*,5*R*,6*S*,12*bS*)-5-((4-(((5-Fluoro-2-((4-(trifluoromethyl)phenyl)amino)pyrimidin-4-yl)amino)methyl)-1*H*-1,2,3-triazol-1-yl)methyl)-3,3,12-trimethyl-4*a*,5,7,8,8*a*,12*b*-hexahydro-4*a*1,6-methanobenzo[2,3]azuleno[8,1-*de*][1,3]dioxepine-5,6(1*H*)-diol **32**

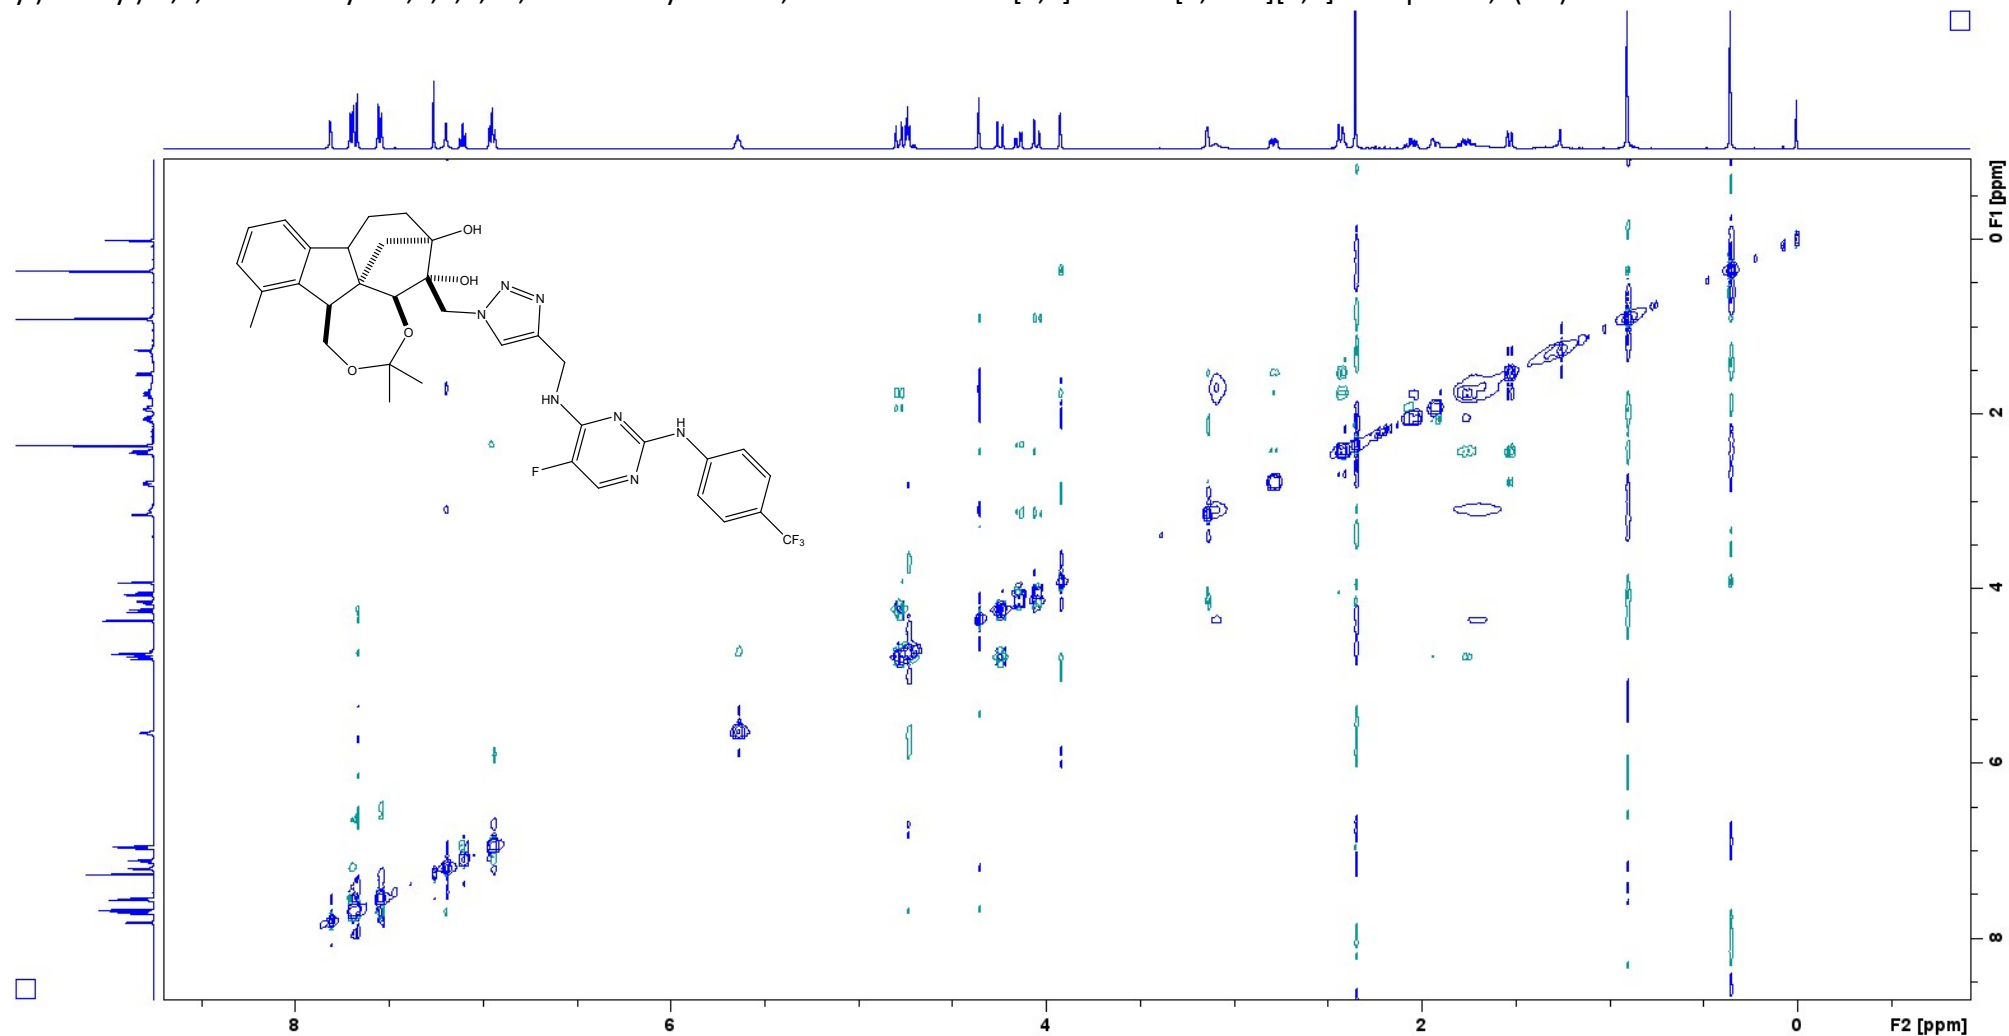

HSQC of (4a*S*,4a<sup>1</sup>*R*,5*R*,6*S*,12*bS*)-5-((4-(((5-Fluoro-2-((4-(trifluoromethyl)phenyl)amino)pyrimidin-4-yl)amino)methyl)-1*H*-1,2,3-triazol-1-yl)methyl)-3,3,12-trimethyl-4a,5,7,8,8a,12*b*-hexahydro-4a1,6-methanobenzo[2,3]azuleno[8,1-*de*][1,3]dioxepine-5,6(1*H*)-diol **32**

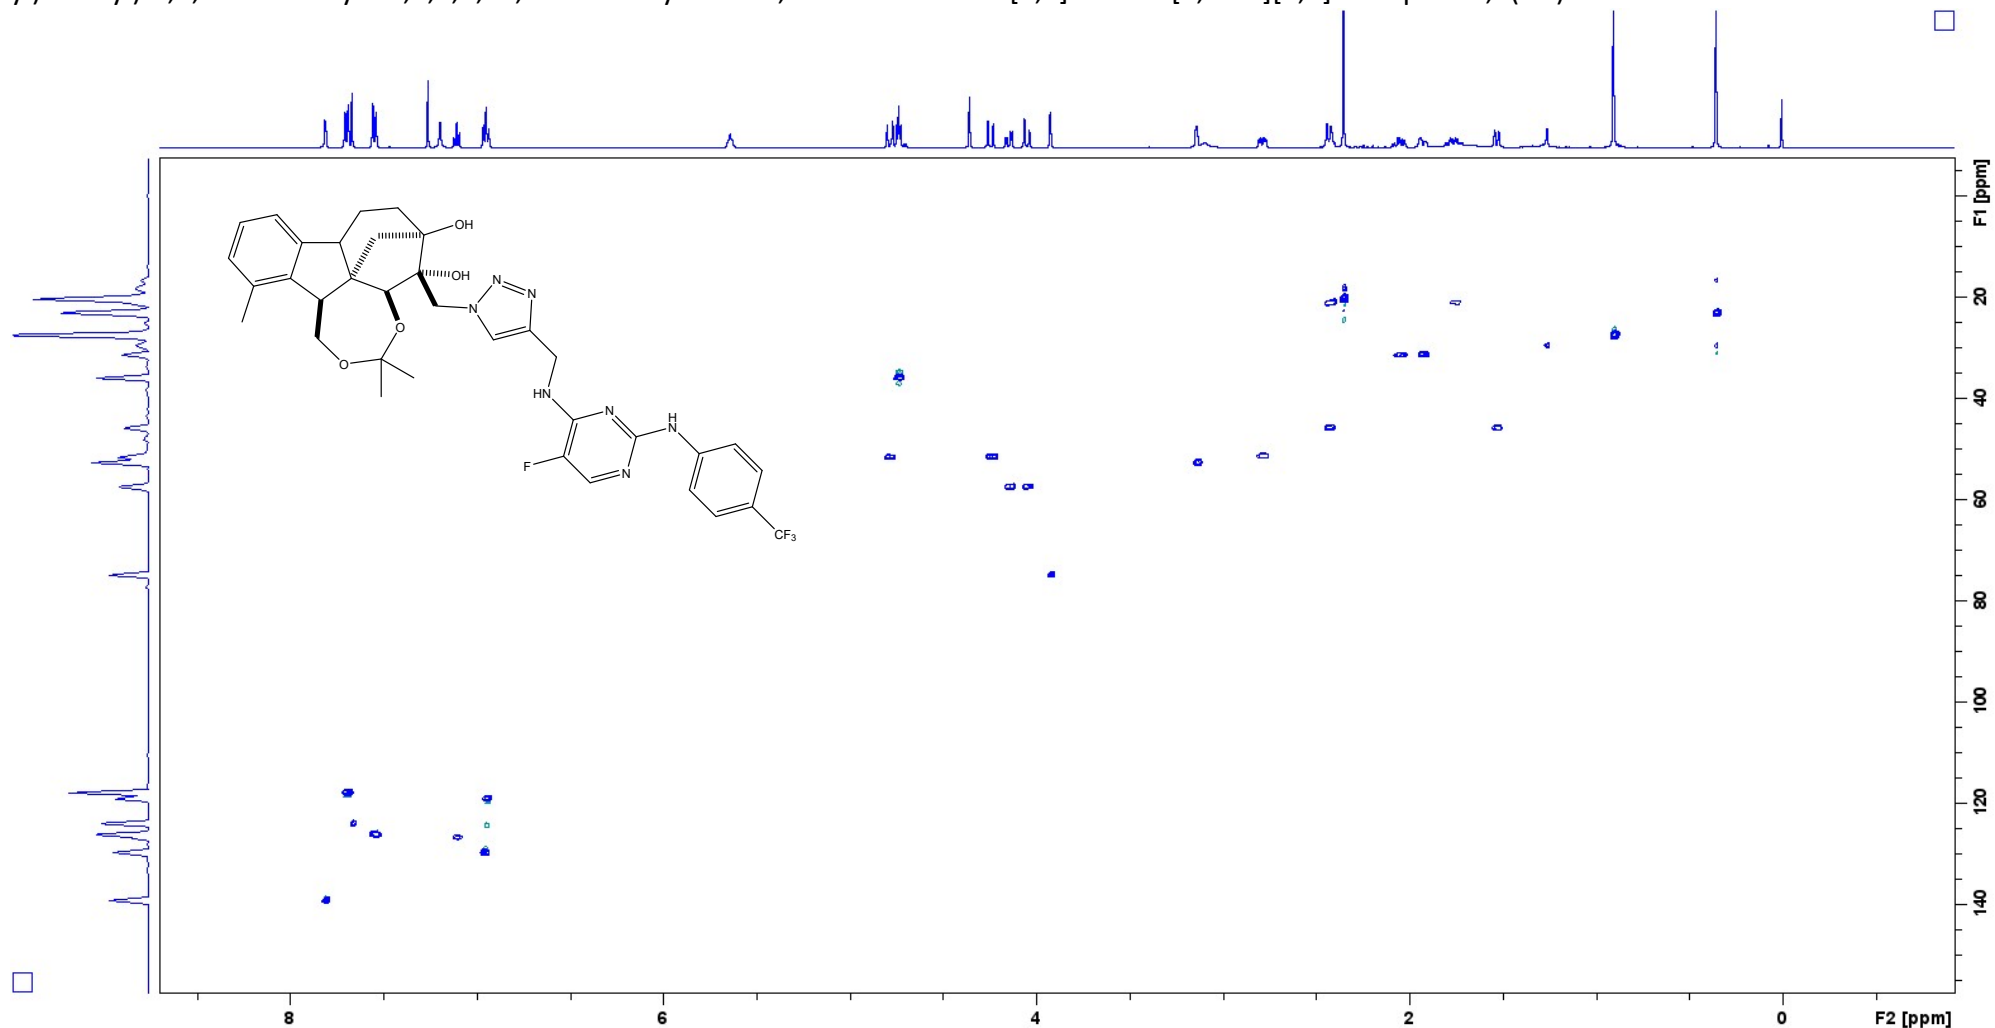

HMBC of (4*a*S,4*a*<sup>1</sup>*R*,5*R*,6*S*,12*b**S*)-5-((4-(((5-Fluoro-2-((4-(trifluoromethyl)phenyl)amino)pyrimidin-4-yl)amino)methyl)-1*H*-1,2,3-triazol-1-yl)methyl)-3,3,12-trimethyl-4*a*,5,7,8,8*a*,12*b*-hexahydro-4*a*1,6-methanobenzo[2,3]azuleno[8,1-*de*][1,3]dioxepine-5,6(1*H*)-diol **32**

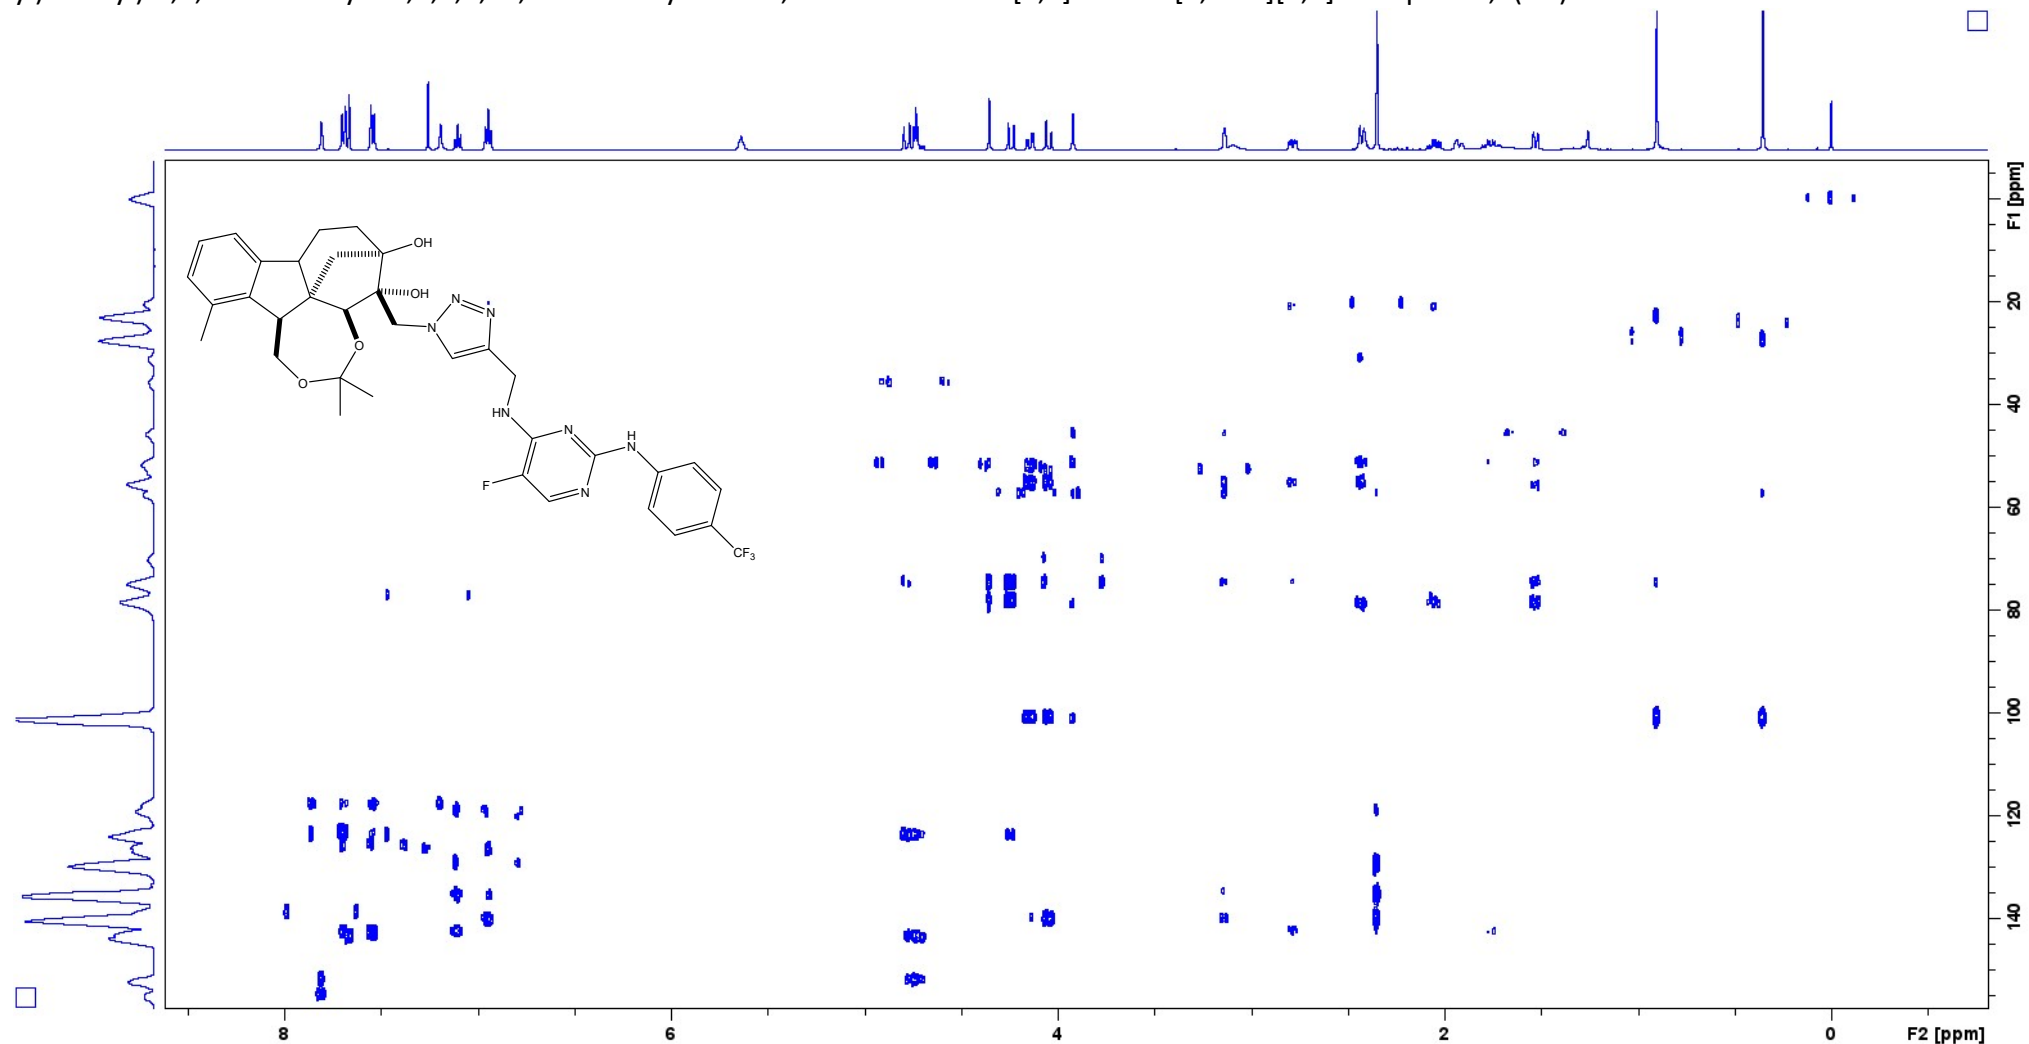

<sup>19</sup>F J-MOD NMR (470 MHz) of (4a*S*,4a<sup>1</sup>*R*,5*R*,6*S*,12*bS*)-5-((4-(((5-Fluoro-2-((4-(trifluoromethyl)phenyl)amino)pyrimidin-4-yl)amino)methyl)-1*H*-1,2,3-triazol-1-yl)methyl)-3,3,12-trimethyl-4a,5,7,8,8a,12*b*-hexahydro-4a,1,6-methanobenzo[2,3]azuleno[8,1-*de*][1,3]dioxepine-5,6(1*H*)-diol **32**

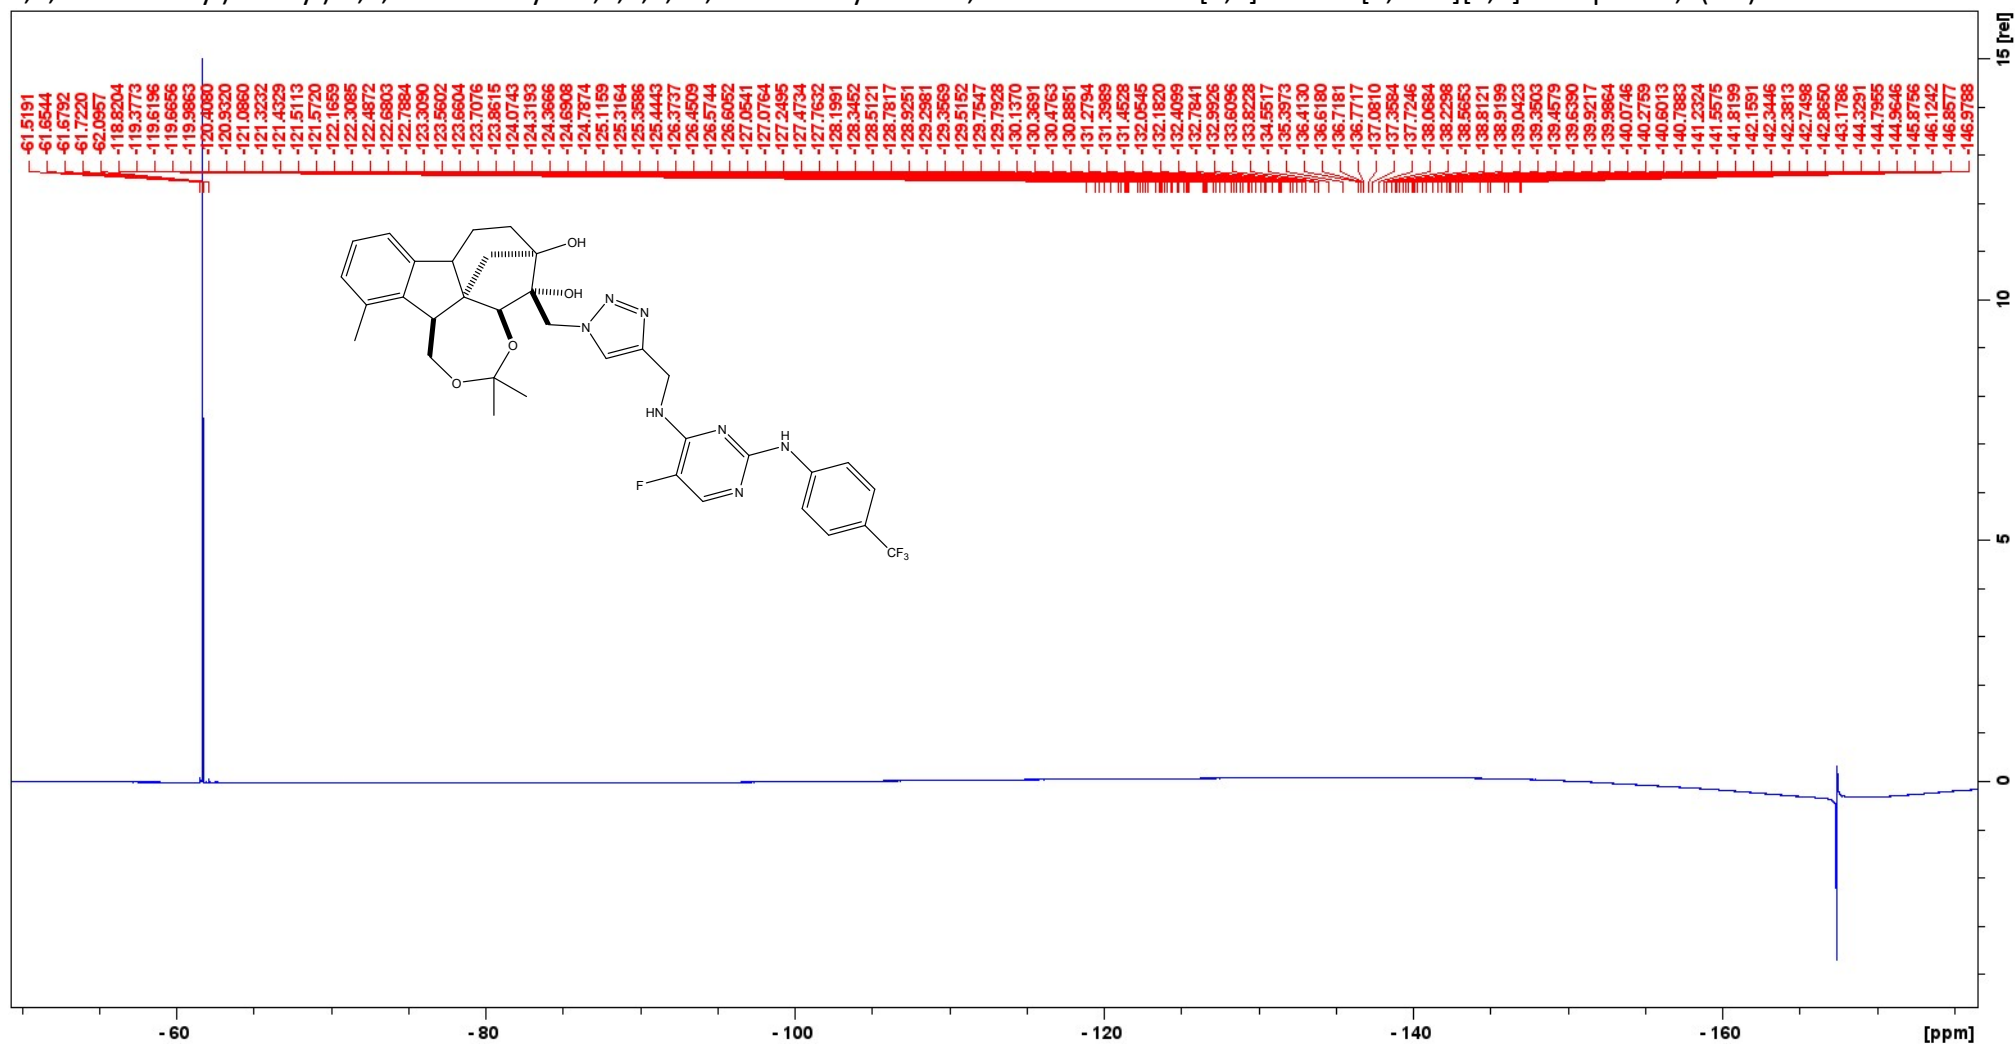



<sup>1</sup>H-NMR (500 MHz) of (4*a*S,4*a*<sup>1</sup>*R*,5*R*,6*S*,12*b**S*)-5-(((4-(((5-Chloro-2-((4-(trifluoromethyl)phenyl)amino)pyrimidin-4-yl)amino)methyl)-1*H*-1,2,3-triazol-1-yl)methyl)-3,3,12-trimethyl-4*a*,5,7,8,8*a*,12*b*-hexahydro-4*a*,1,6-methanobenzo[2,3]azuleno[8,1-*de*][1,3]dioxepine-5,6(1*H*)-diol **33**

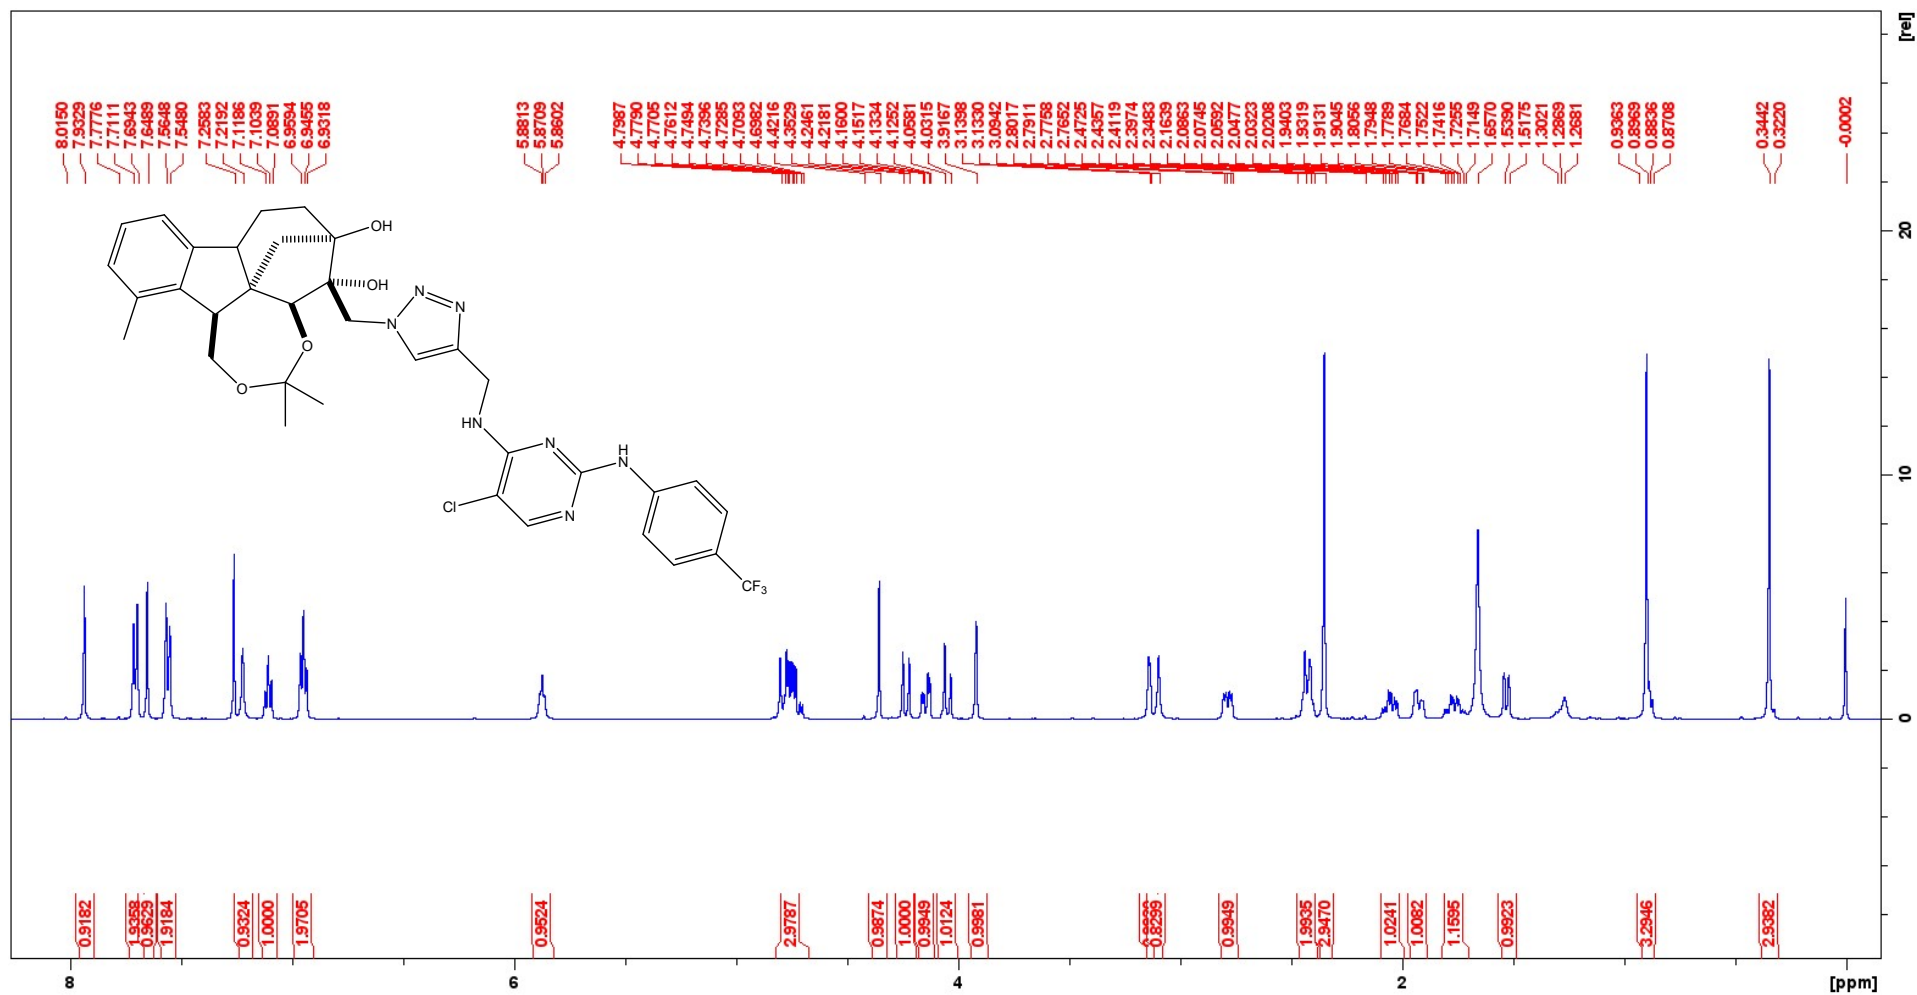

<sup>13</sup>C{<sup>1</sup>H} J-MOD NMR (125 MHz) of (4a*S*,4a<sup>1</sup>*R*,5*R*,6*S*,12*bS*)-5-(((5-Chloro-2-((4-(trifluoromethyl)phenyl)amino)pyrimidin-4-yl)amino)methyl)-1*H*-1,2,3-triazol-1-yl)methyl)-3,3,12-trimethyl-4a,5,7,8,8a,12*b*-hexahydro-4a,1,6-methanobenzo[2,3]azuleno[8,1-*de*][1,3]dioxepine-5,6(1*H*)-diol  
**33**

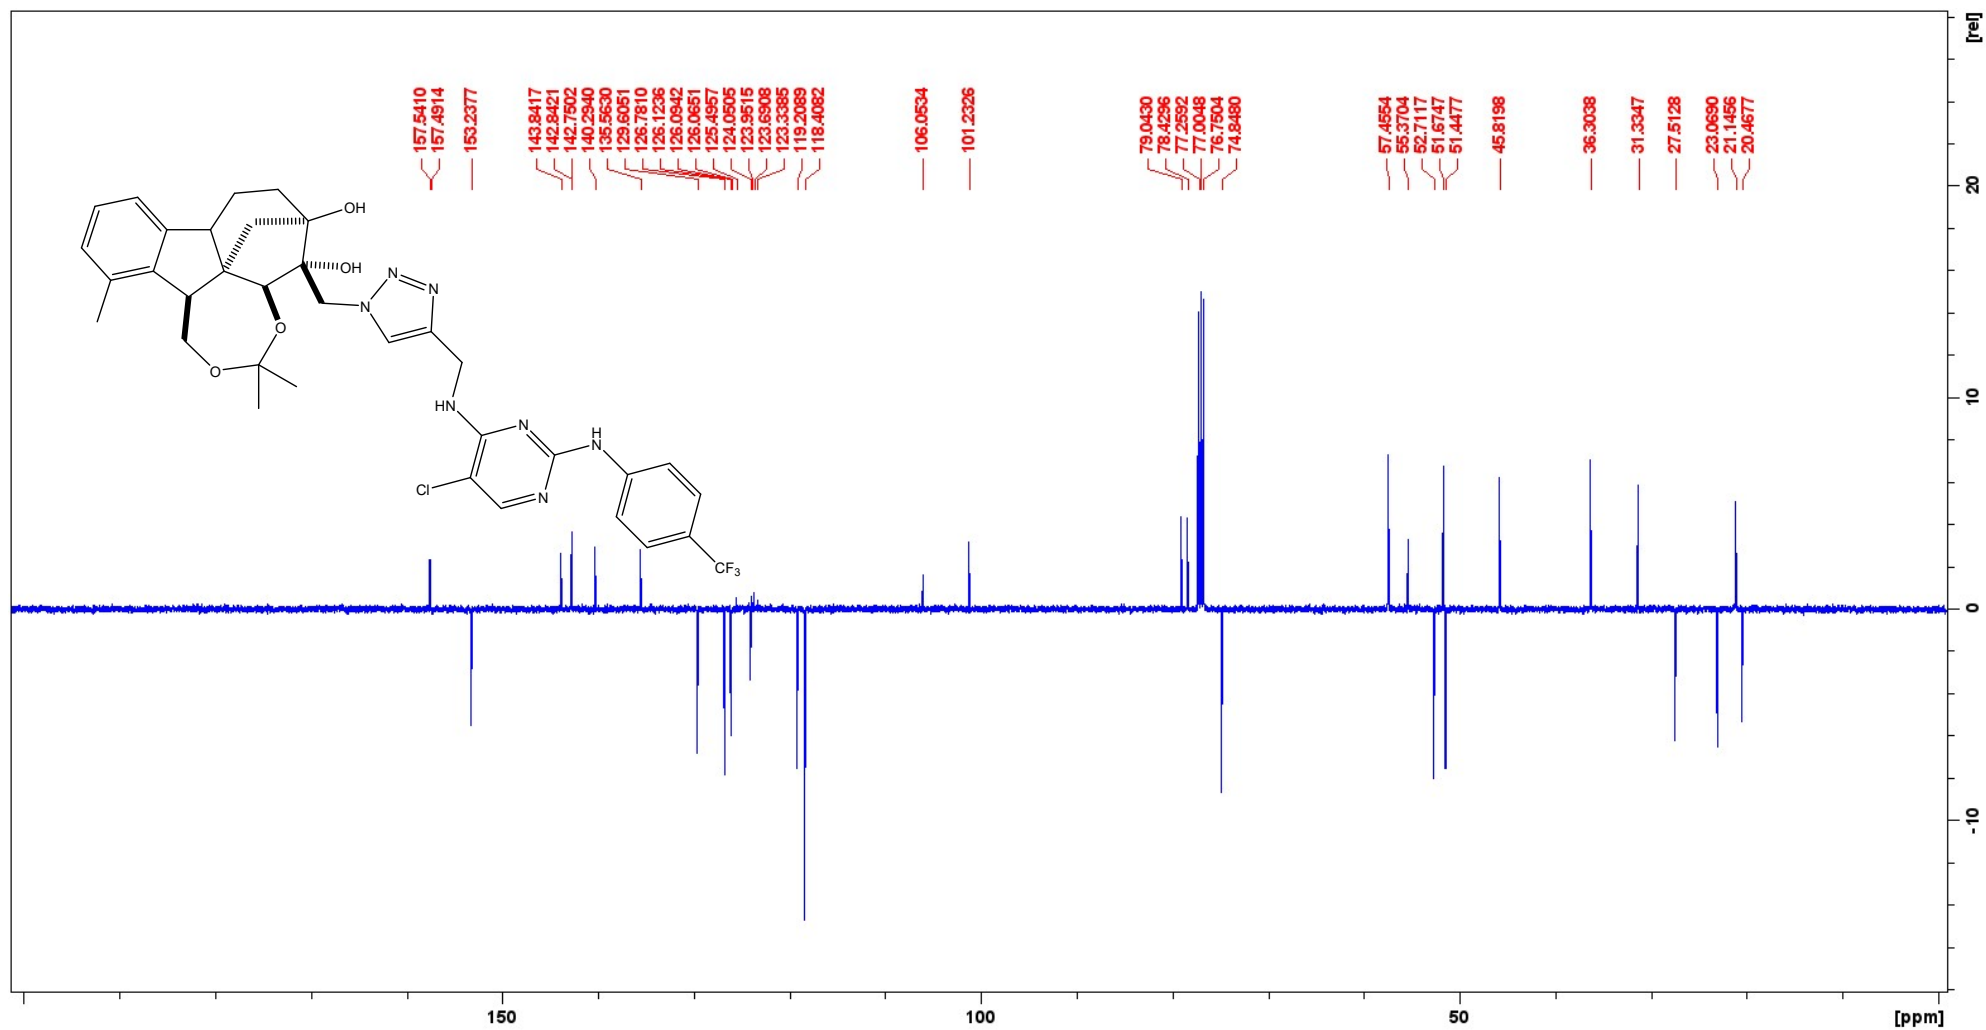

COSY of (4*S*,4*a*<sup>1</sup>*R*,5*R*,6*S*,12*bS*)-5-((4-(((5-Chloro-2-((4-(trifluoromethyl)phenyl)amino)pyrimidin-4-yl)amino)methyl)-1*H*-1,2,3-triazol-1-yl)methyl)-3,3,12-trimethyl-4*a*,5,7,8,8*a*,12*b*-hexahydro-4*a*1,6-methanobenzo[2,3]azuleno[8,1-*de*][1,3]dioxepine-5,6(1*H*)-diol **33**

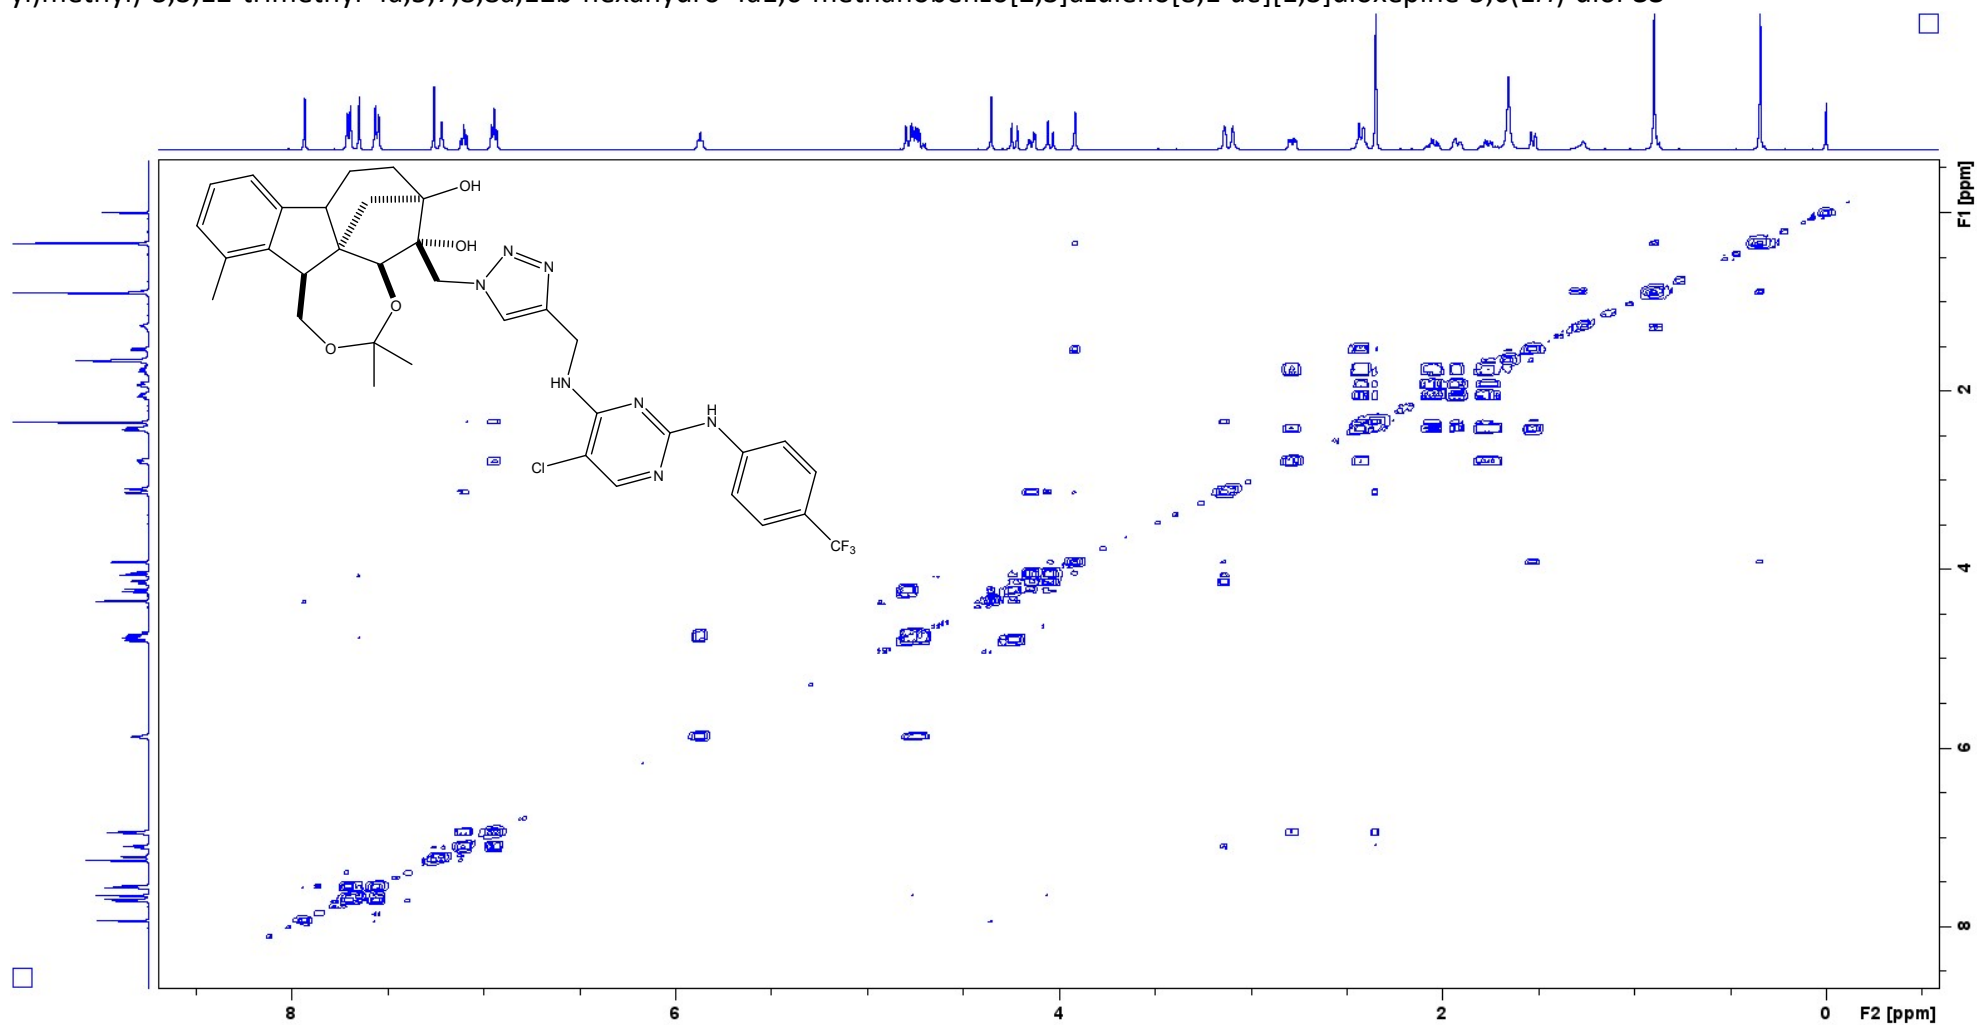

HSQC of (4a*S*,4a<sup>1</sup>*R*,5*R*,6*S*,12*bS*)-5-((4-(((5-Chloro-2-((4-(trifluoromethyl)phenyl)amino)pyrimidin-4-yl)amino)methyl)-1*H*-1,2,3-triazol-1-yl)methyl)-3,3,12-trimethyl-4a,5,7,8,8a,12*b*-hexahydro-4a1,6-methanobenzo[2,3]azuleno[8,1-*de*][1,3]dioxepine-5,6(1*H*)-diol **33**

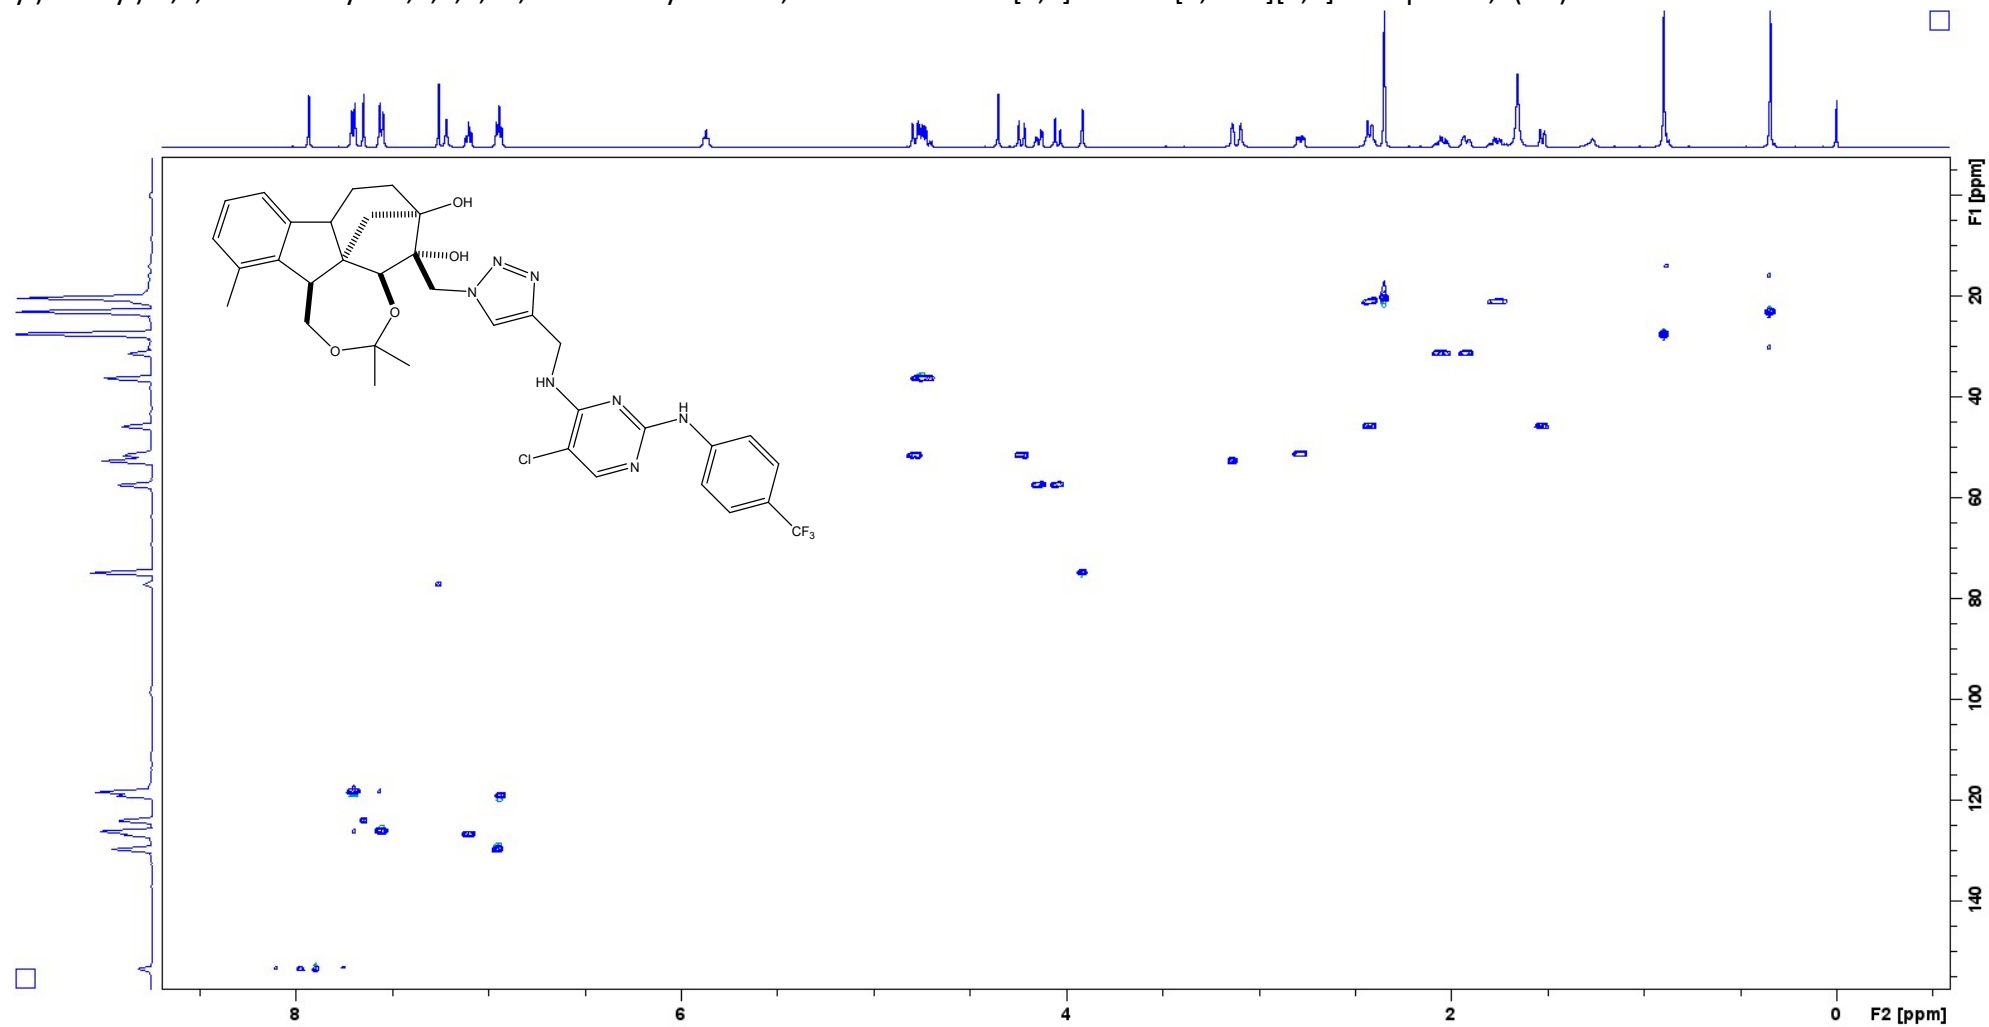

HMBC of (4*S*,4*a*<sup>1</sup>*R*,5*R*,6*S*,12*bS*)-5-((4-(((5-Chloro-2-((4-(trifluoromethyl)phenyl)amino)pyrimidin-4-yl)amino)methyl)-1*H*-1,2,3-triazol-1-yl)methyl)-3,3,12-trimethyl-4*a*,5,7,8,8*a*,12*b*-hexahydro-4*a*1,6-methanobenzo[2,3]azuleno[8,1-*de*][1,3]dioxepine-5,6(1*H*)-diol **33**

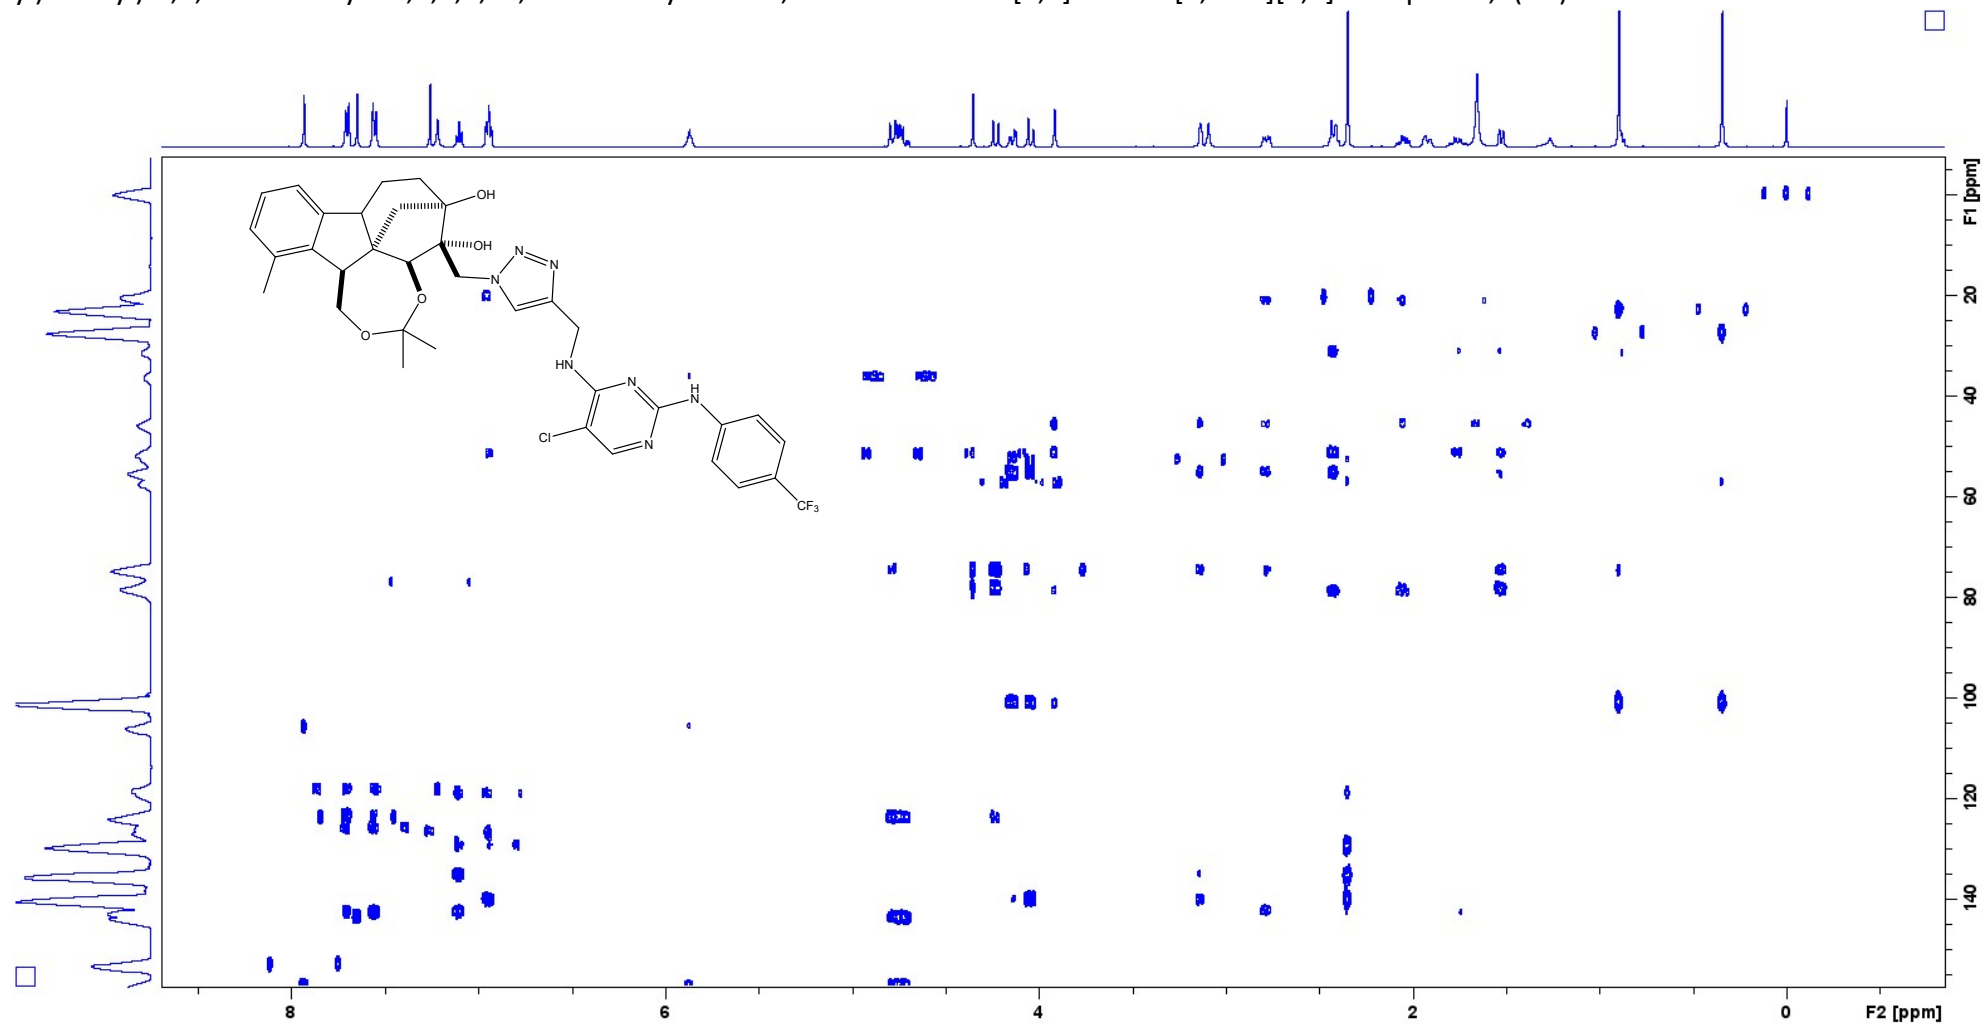

<sup>19</sup>F J-MOD NMR (470 MHz) of (4a*S*,4a<sup>1</sup>*R*,5*R*,6*S*,12*bS*)-5-((4-(((5-Chloro-2-((4-(trifluoromethyl)phenyl)amino)pyrimidin-4-yl)amino)methyl)-1*H*-1,2,3-triazol-1-yl)methyl)-3,3,12-trimethyl-4a,5,7,8,8a,12*b*-hexahydro-4a1,6-methanobenzo[2,3]azuleno[8,1-*de*][1,3]dioxepine-5,6(1*H*)-diol **33**

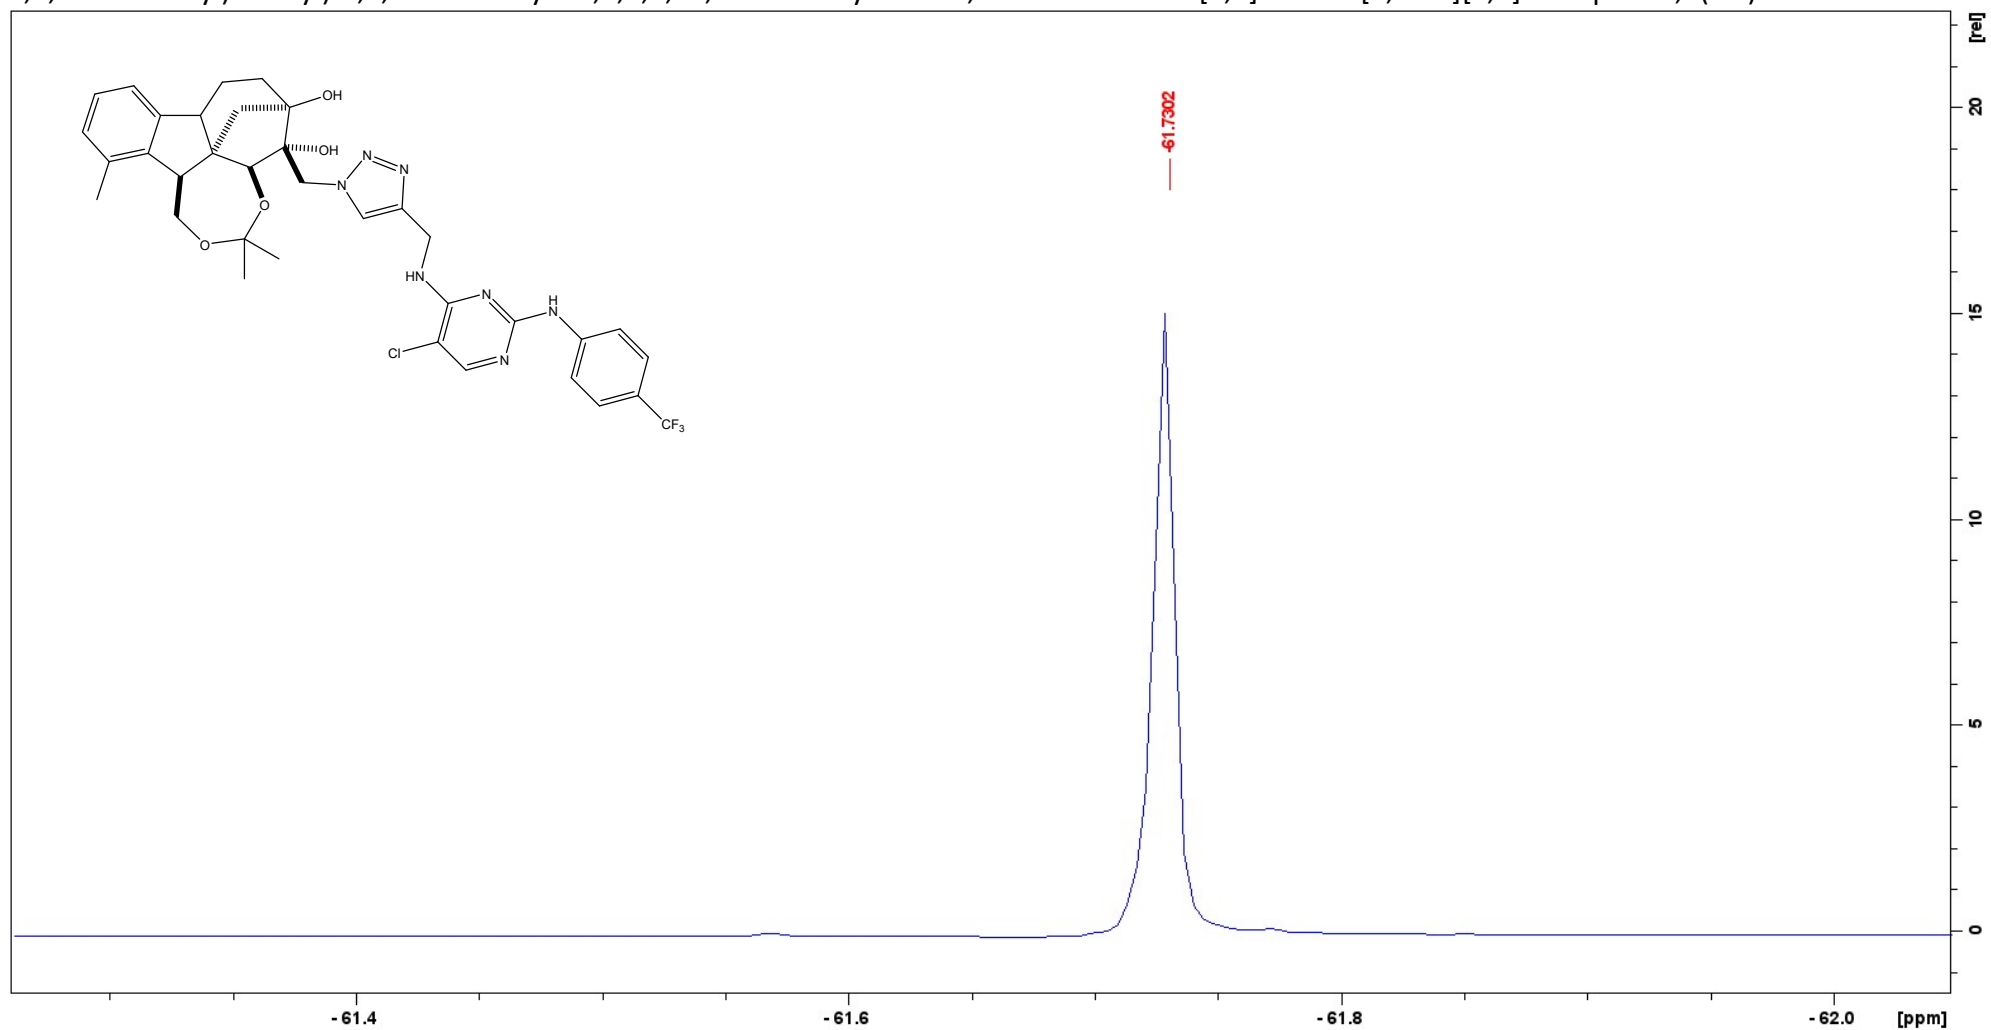

$^1\text{H-NMR}$  (500 MHz) of 1-((1-(((4*aS*,4*a*<sup>1*R*</sup>,5*R*,6*S*,12*bS*)-5,6-Dihydroxy-3,3,12-trimethyl-1,4*a*,5,6,7,8,8*a*,12*b*-octahydro-4*a*1,6-methanobenzo[2,3]azuleno[8,1-*de*][1,3]dioxepin-5-yl)methyl)-1*H*-1,2,3-triazol-4-yl)methyl)pyrimidine-2,4(1*H*,3*H*)-dione **34**

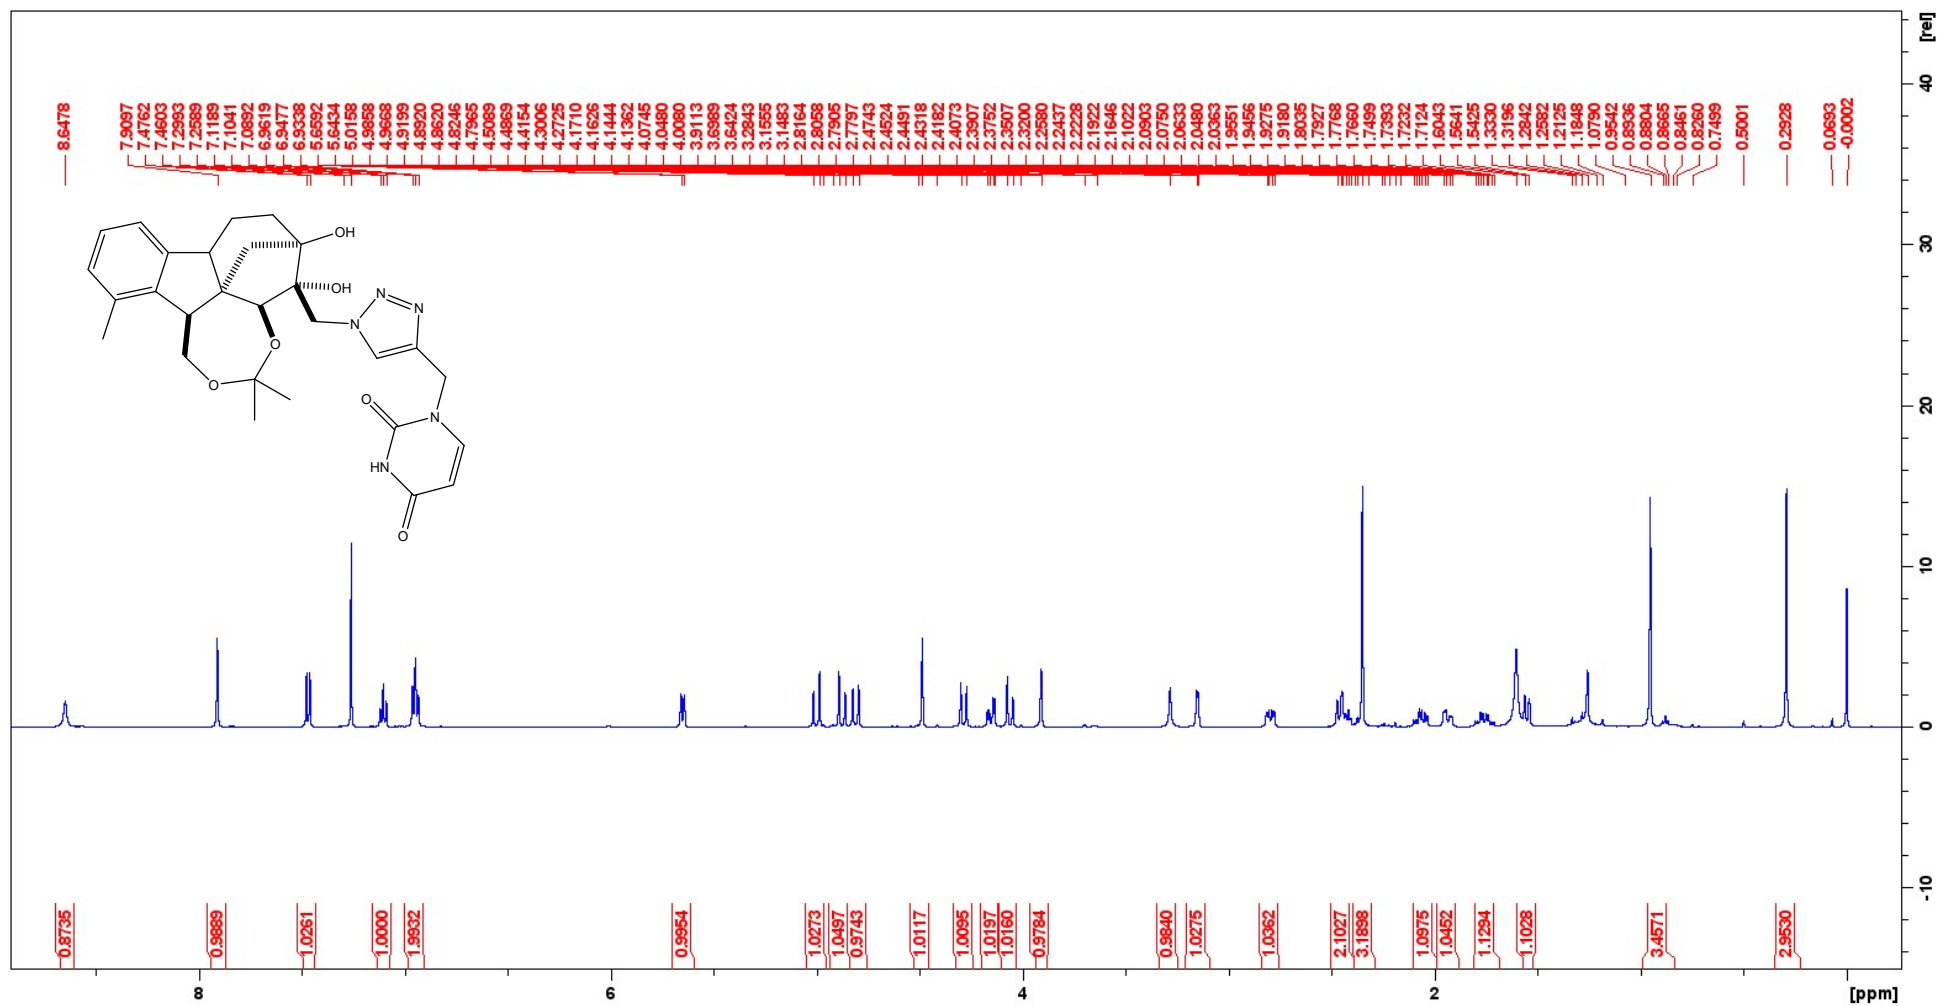

$^{13}\text{C}\{^1\text{H}\}$  J-MOD NMR (125 MHz) of 1-((1-(((4a*S*,4a<sup>1*R*</sup>,5*R*,6*S*,12*bS*)-5,6-Dihydroxy-3,3,12-trimethyl-1,4a,5,6,7,8,8a,12*b*-octahydro-4a1,6-methanobenzo[2,3]azuleno[8,1-*de*][1,3]dioxepin-5-yl)methyl)-1*H*-1,2,3-triazol-4-yl)methyl)pyrimidine-2,4(1*H*,3*H*)-dione **34**

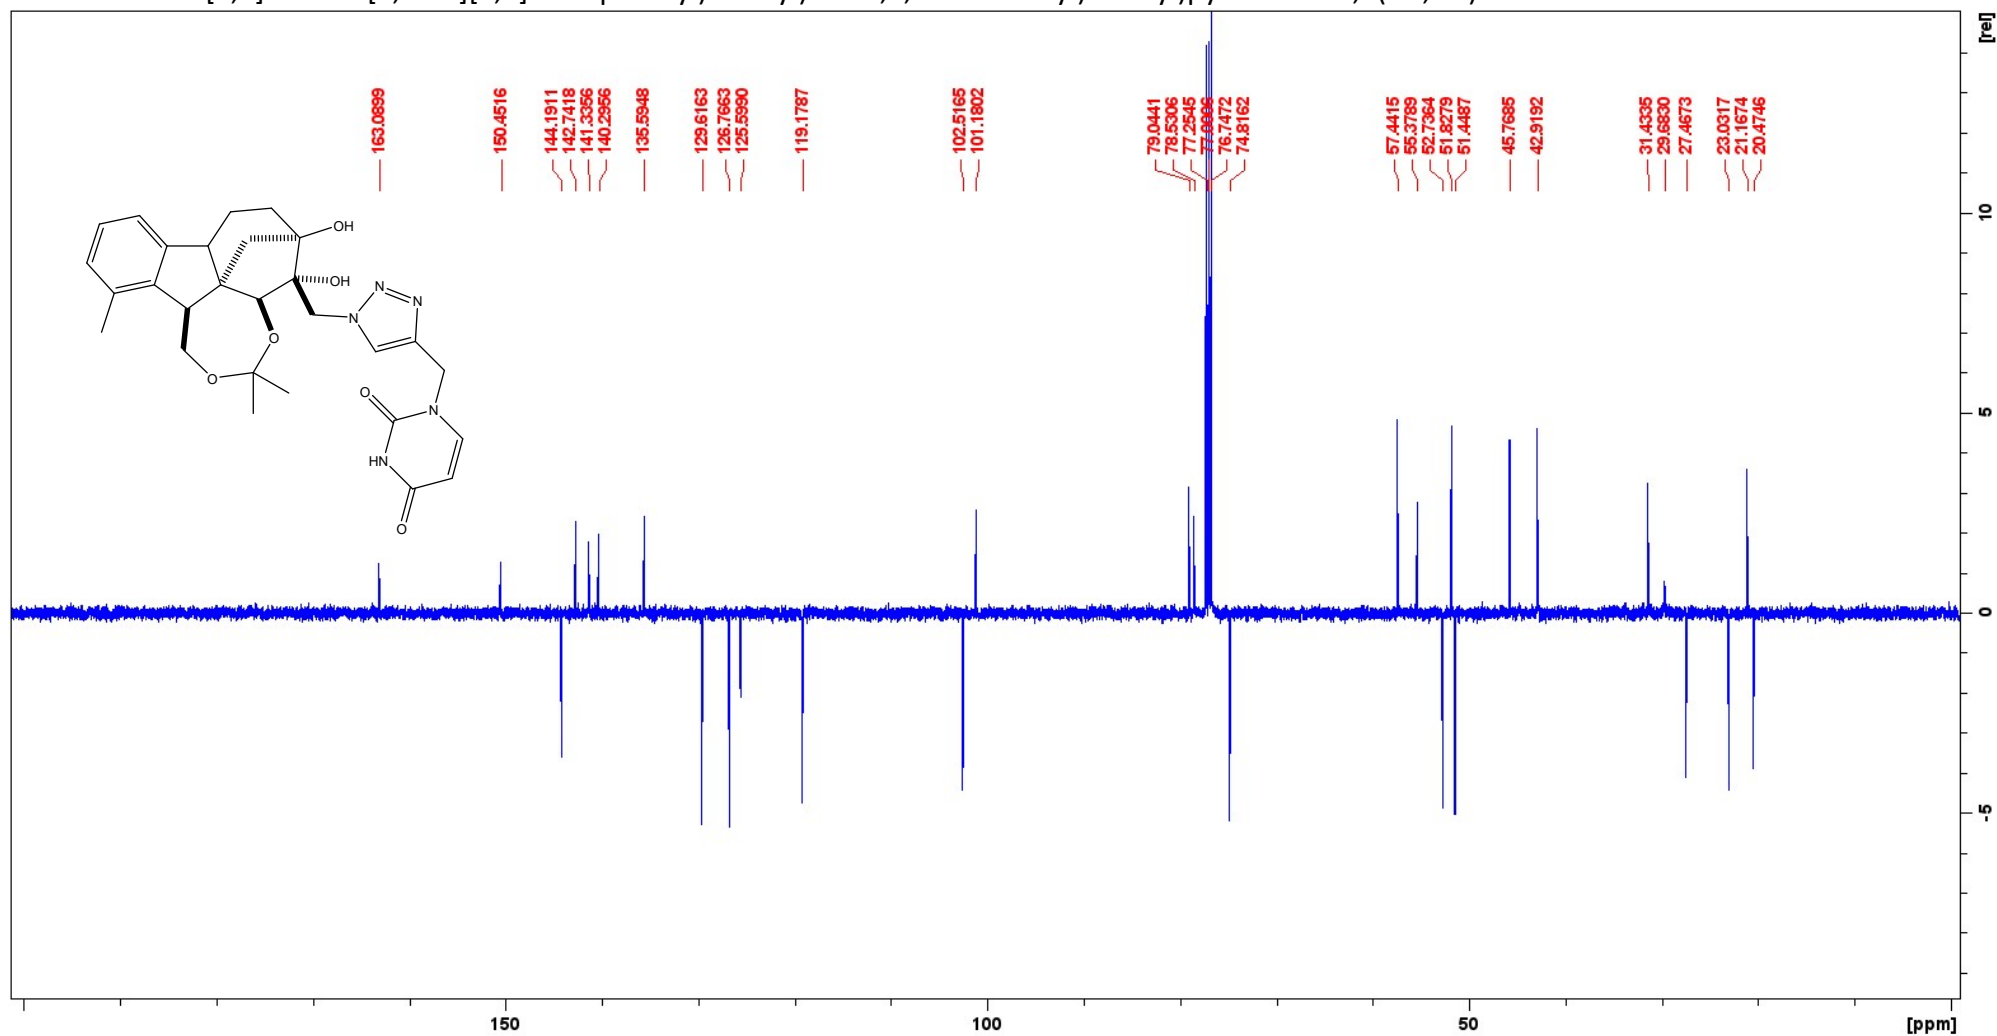



COSY of 1-((1-(((4a*S*,4a<sup>1*R*</sup>,5*R*,6*S*,12*bS*)-5,6-Dihydroxy-3,3,12-trimethyl-1,4a,5,6,7,8,8a,12b-octahydro-4a1,6-methanobenzo[2,3]azuleno[8,1-*de*][1,3]dioxepin-5-yl)methyl)-1*H*-1,2,3-triazol-4-yl)methyl)pyrimidine-2,4(1*H*,3*H*)-dione **34**

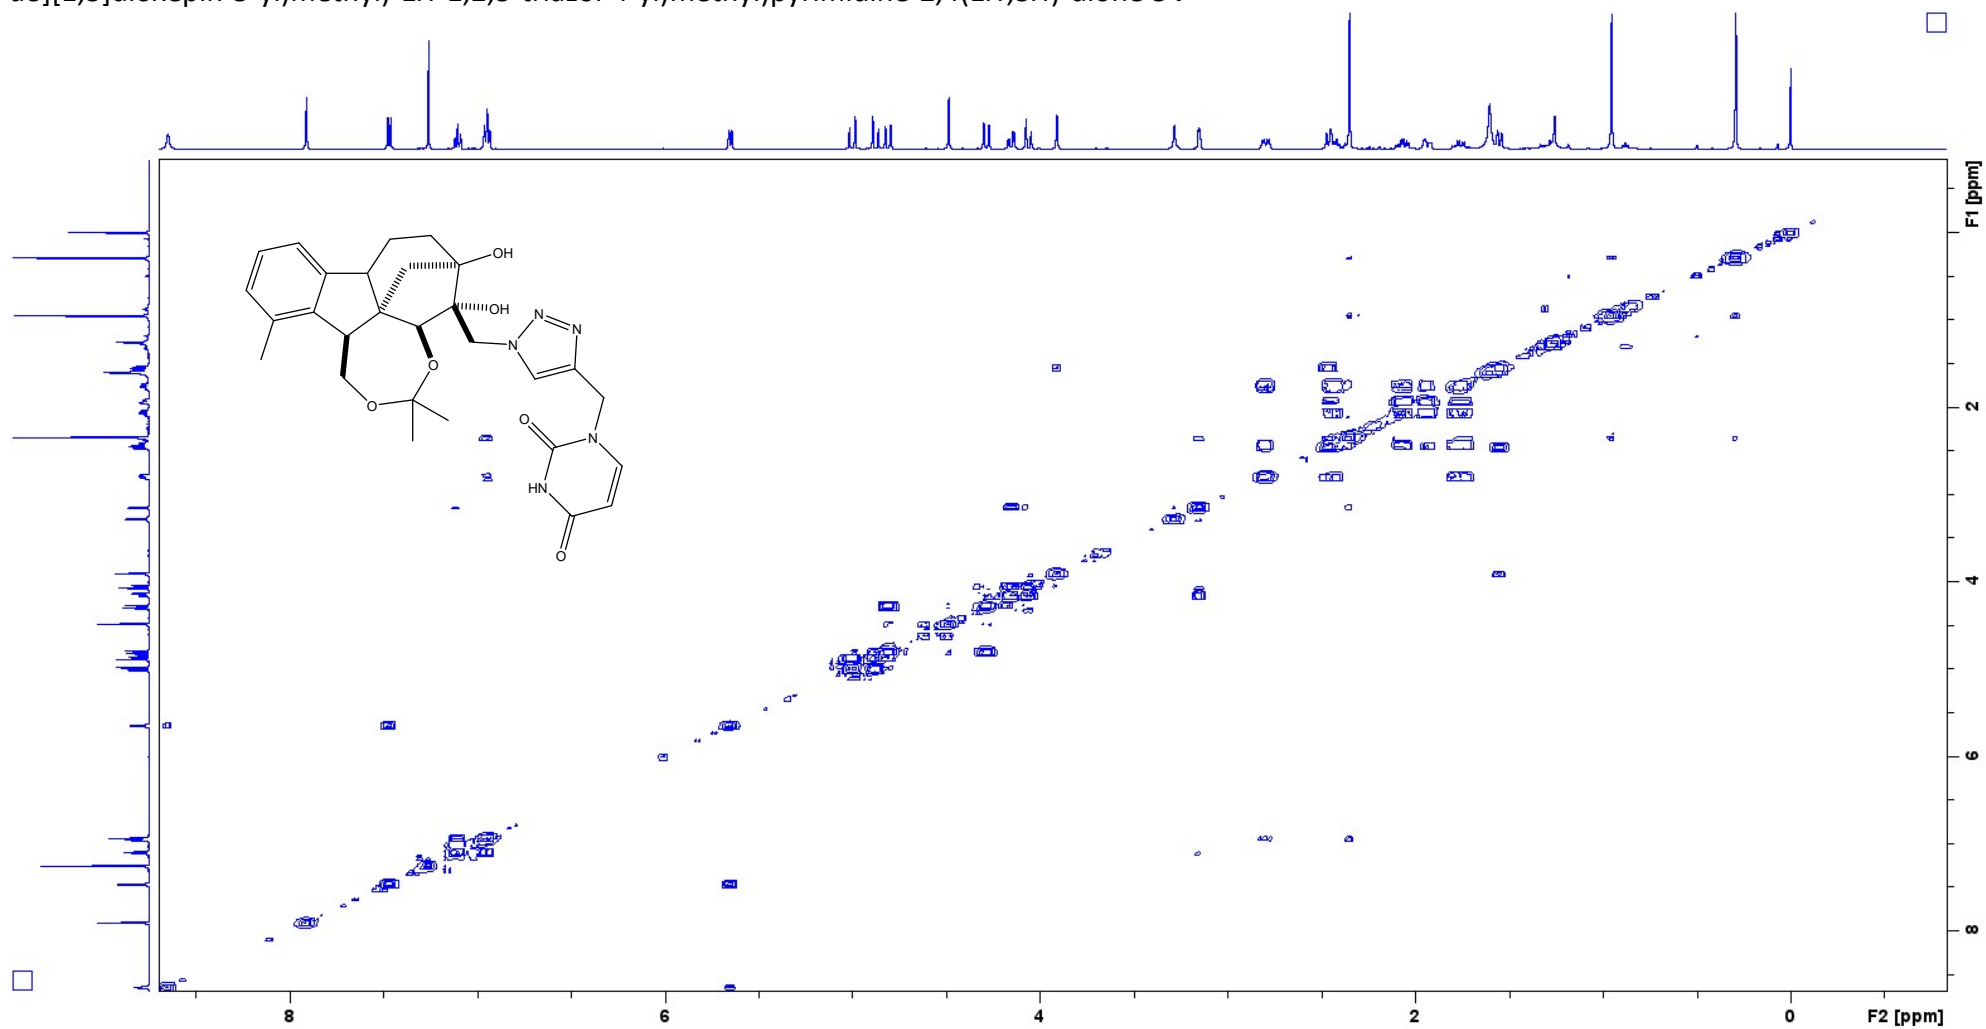

NOESY of 1-((1-(((4a*S*,4a<sup>1</sup>*R*,5*R*,6*S*,12*bS*)-5,6-Dihydroxy-3,3,12-trimethyl-1,4a,5,6,7,8,8a,12*b*-octahydro-4a1,6-methanobenzo[2,3]azuleno[8,1-*de*][1,3]dioxepin-5-yl)methyl)-1*H*-1,2,3-triazol-4-yl)methyl)pyrimidine-2,4(1*H*,3*H*)-dione **34**

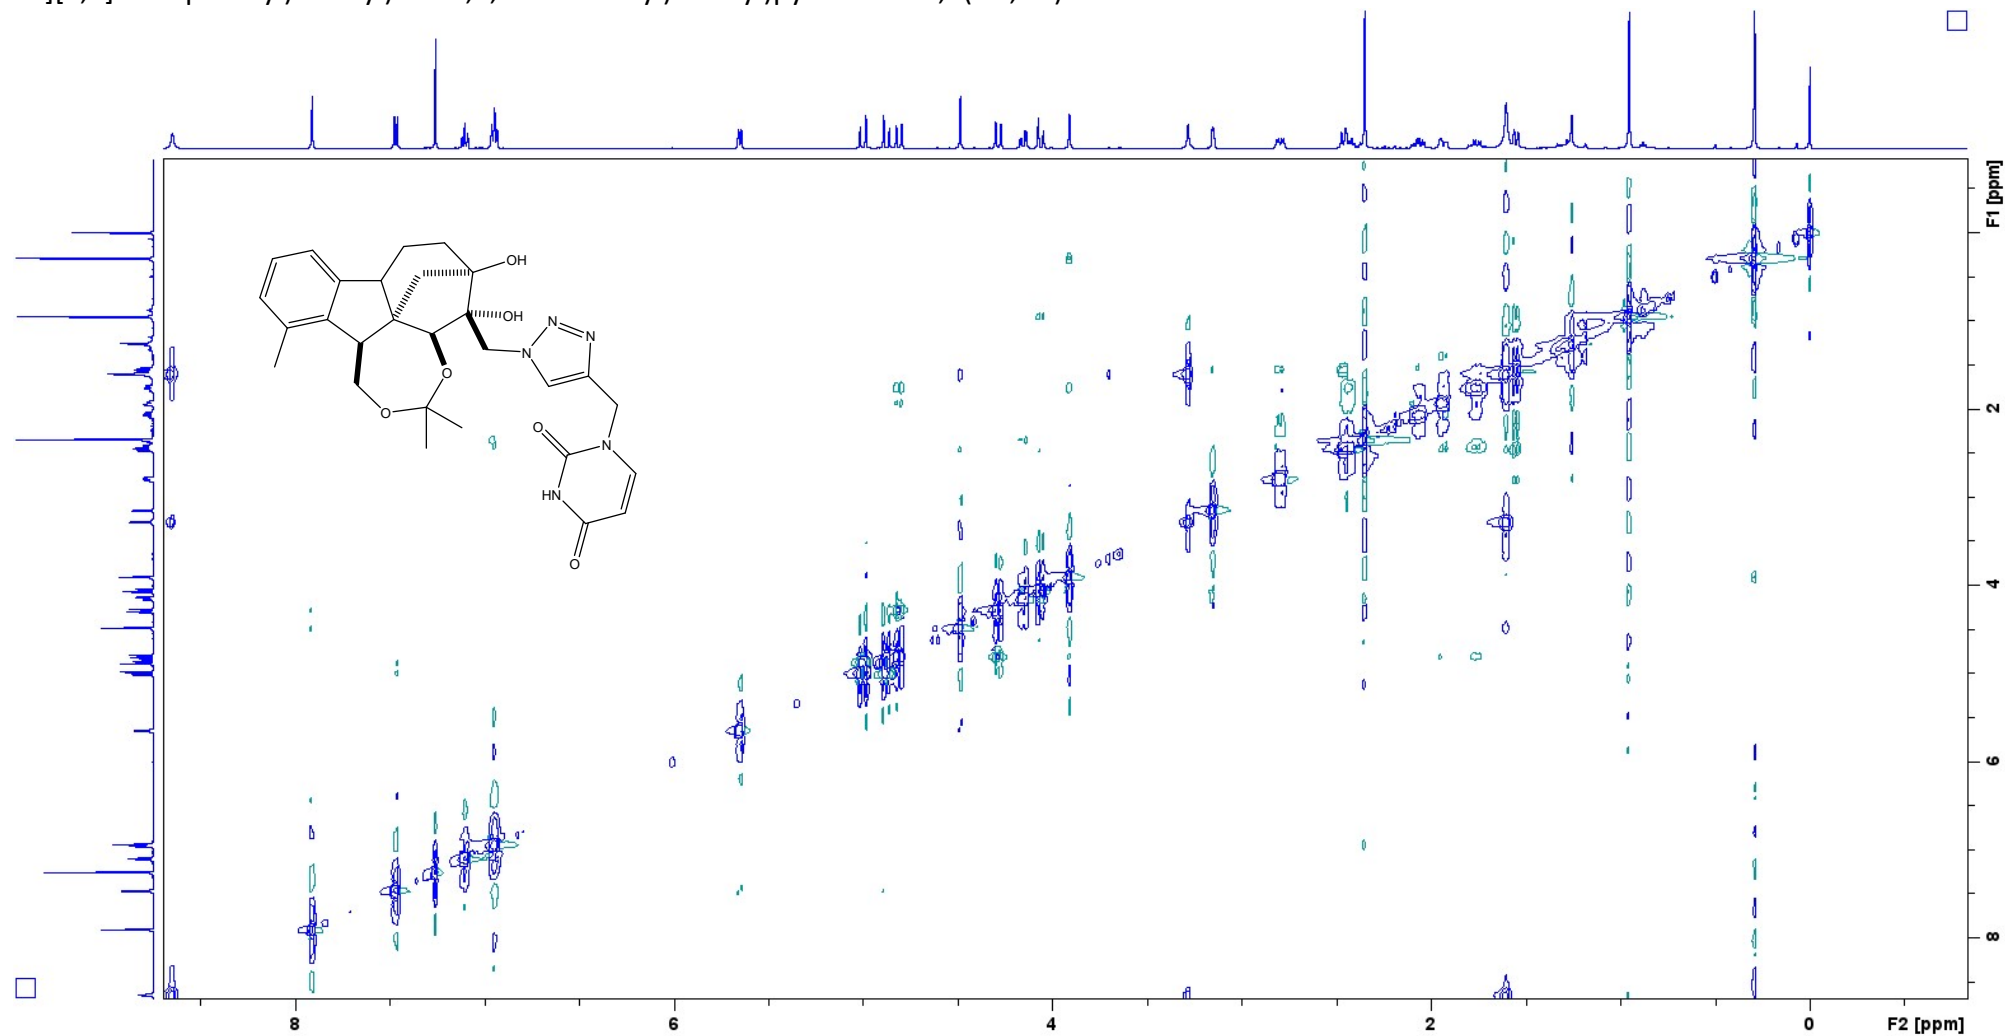

HSQC of 1-((1-(((4a*S*,4a<sup>1</sup>*R*,5*R*,6*S*,12*bS*)-5,6-Dihydroxy-3,3,12-trimethyl-1,4a,5,6,7,8,8a,12*b*-octahydro-4a1,6-methanobenzo[2,3]azuleno[8,1-*de*][1,3]dioxepin-5-yl)methyl)-1*H*-1,2,3-triazol-4-yl)methyl)pyrimidine-2,4(1*H*,3*H*)-dione **34**

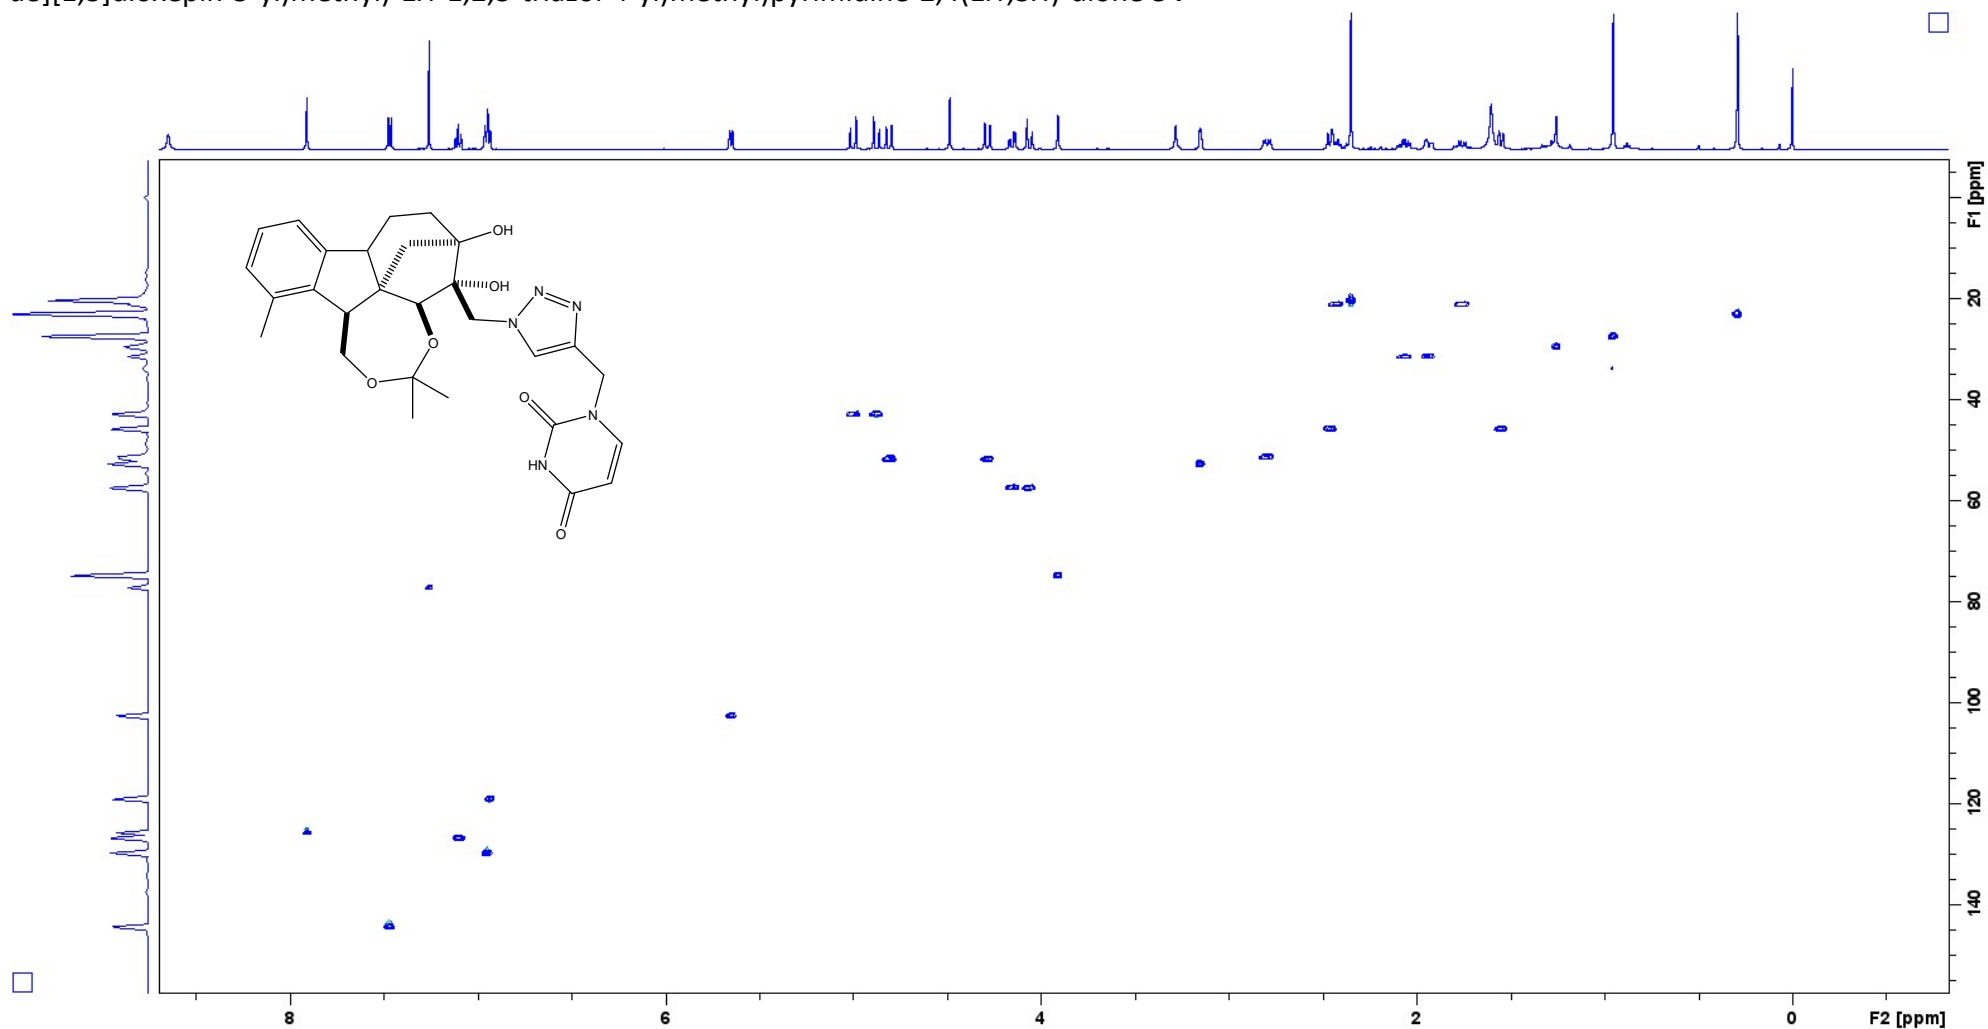

HMBC of 1-((1-(((4a*S*,4a<sup>1</sup>*R*,5*R*,6*S*,12*bS*)-5,6-Dihydroxy-3,3,12-trimethyl-1,4a,5,6,7,8,8a,12b-octahydro-4a1,6-methanobenzo[2,3]azuleno[8,1-*de*][1,3]dioxepin-5-yl)methyl)-1*H*-1,2,3-triazol-4-yl)methyl)pyrimidine-2,4(1*H*,3*H*)-dione **34**

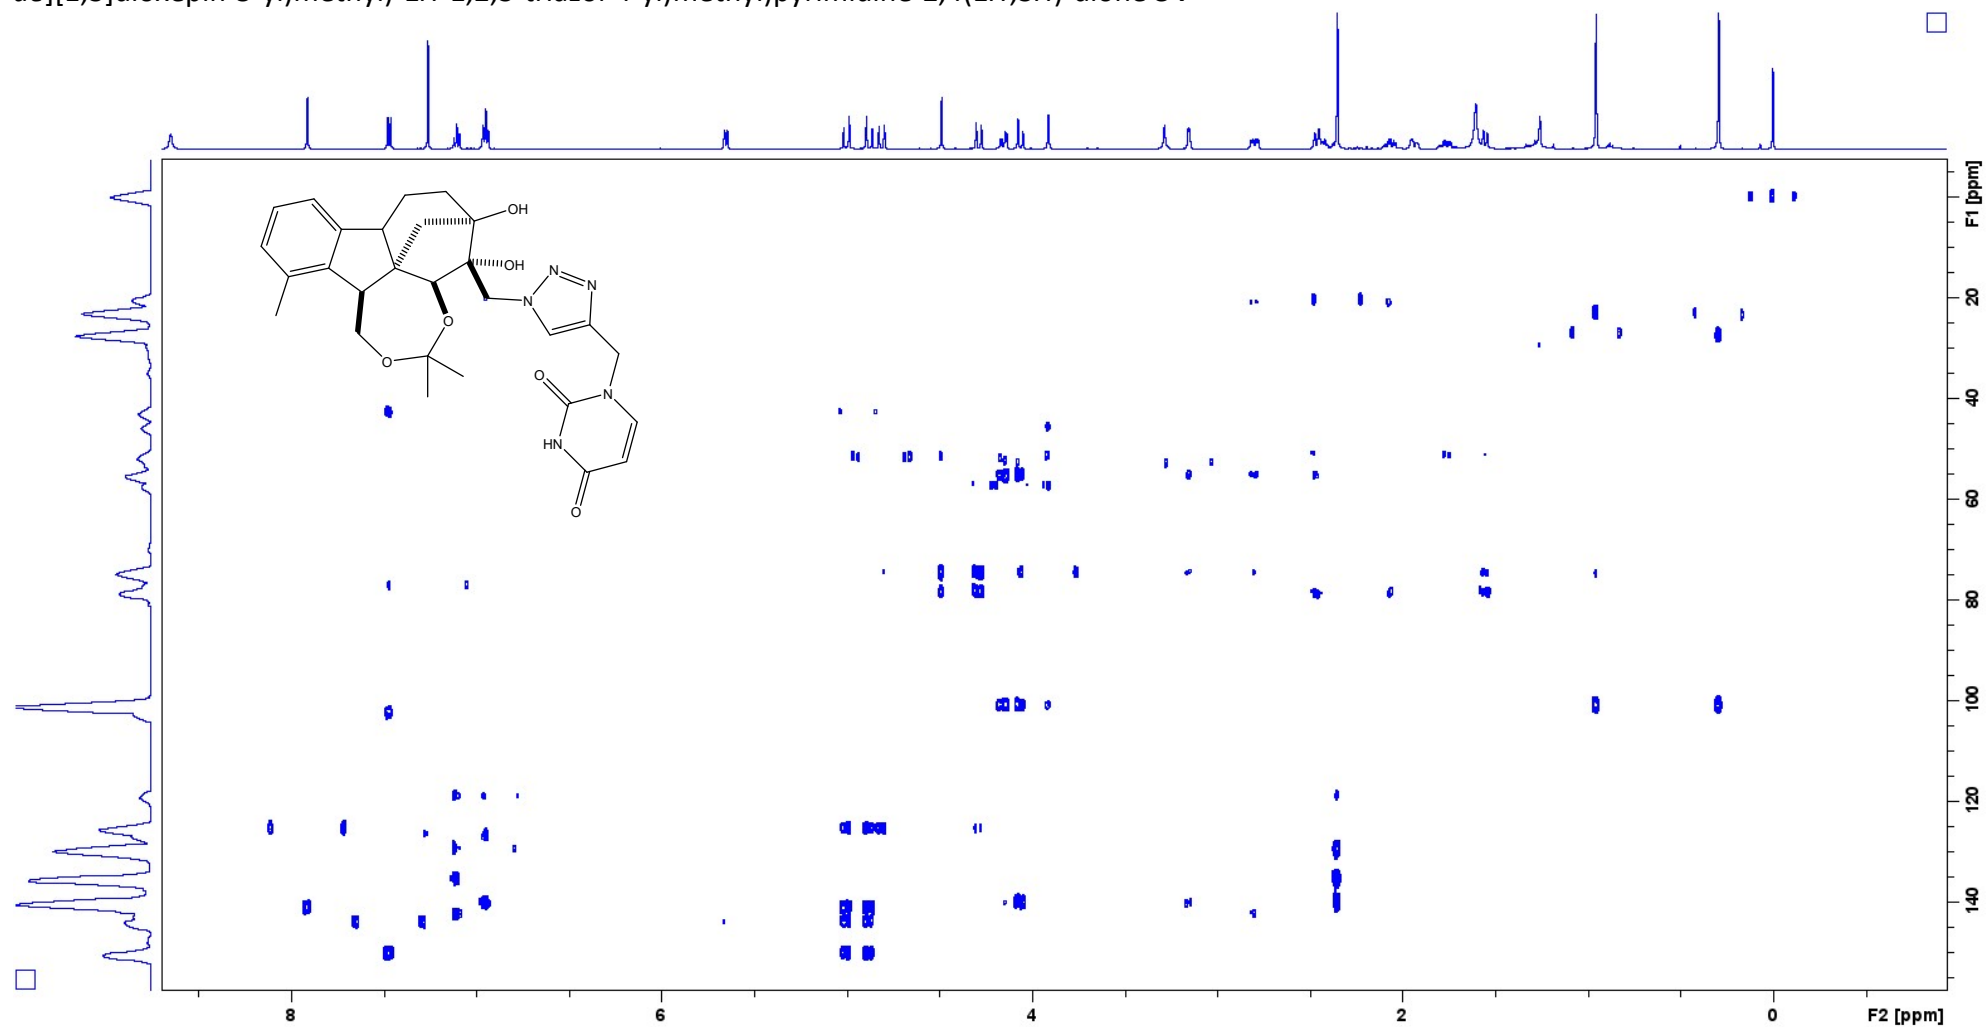

$^1\text{H-NMR}$  (500 MHz) of 1,4a,5,6,7,8,8a,12b-octahydro-4a<sup>1</sup>,6-methanobenzo[2,3]azuleno[8,1-de][1,3]dioxepin-5-yl)methyl)-1*H*-1,2,3-triazol-4-yl)methyl)-5-fluoropyrimidine-2,4(1*H*,3*H*)-dione **35**

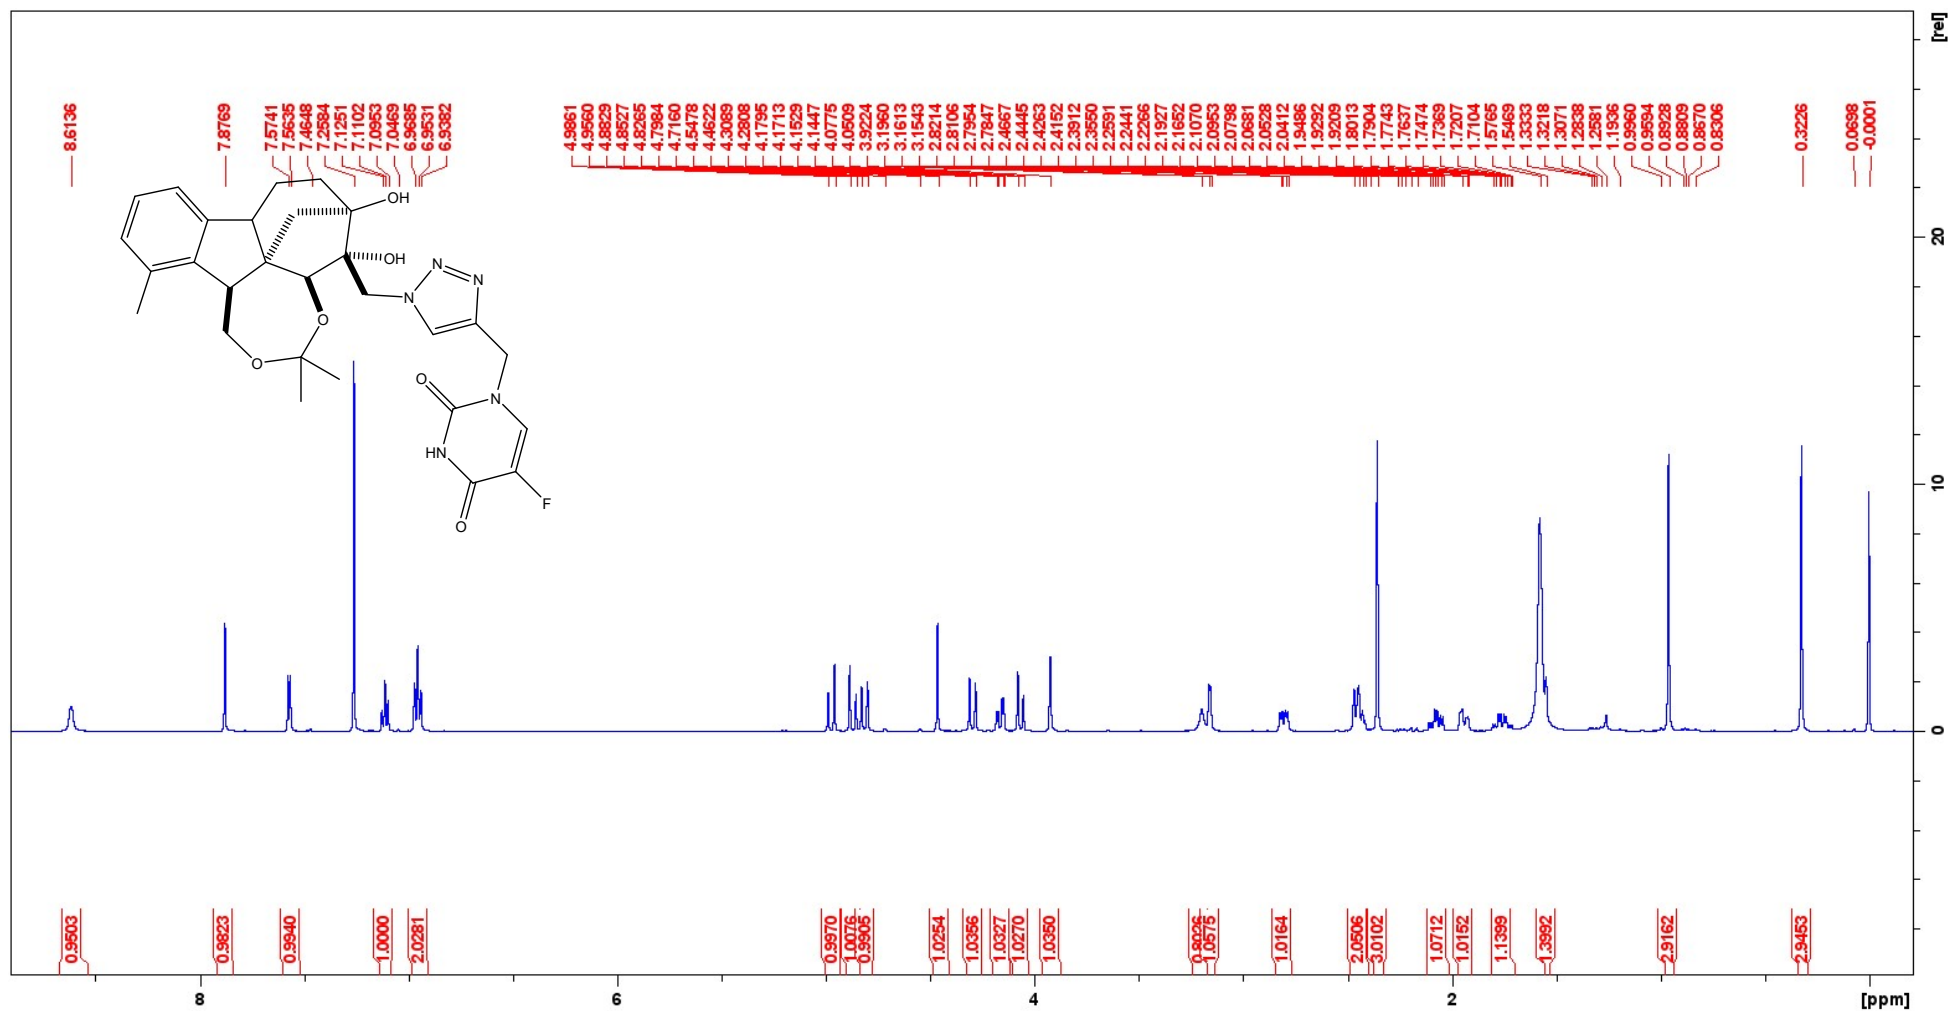

$^{13}\text{C}\{^1\text{H}\}$  J-MOD NMR (125 MHz) of 1,4a,5,6,7,8,8a,12b-octahydro-4a<sup>1</sup>,6-methanobenzo[2,3]azuleno[8,1-de][1,3]dioxepin-5-yl)methyl)-1H-1,2,3-triazol-4-yl)methyl)-5-fluoropyrimidine-2,4(1H,3H)-dione **35**

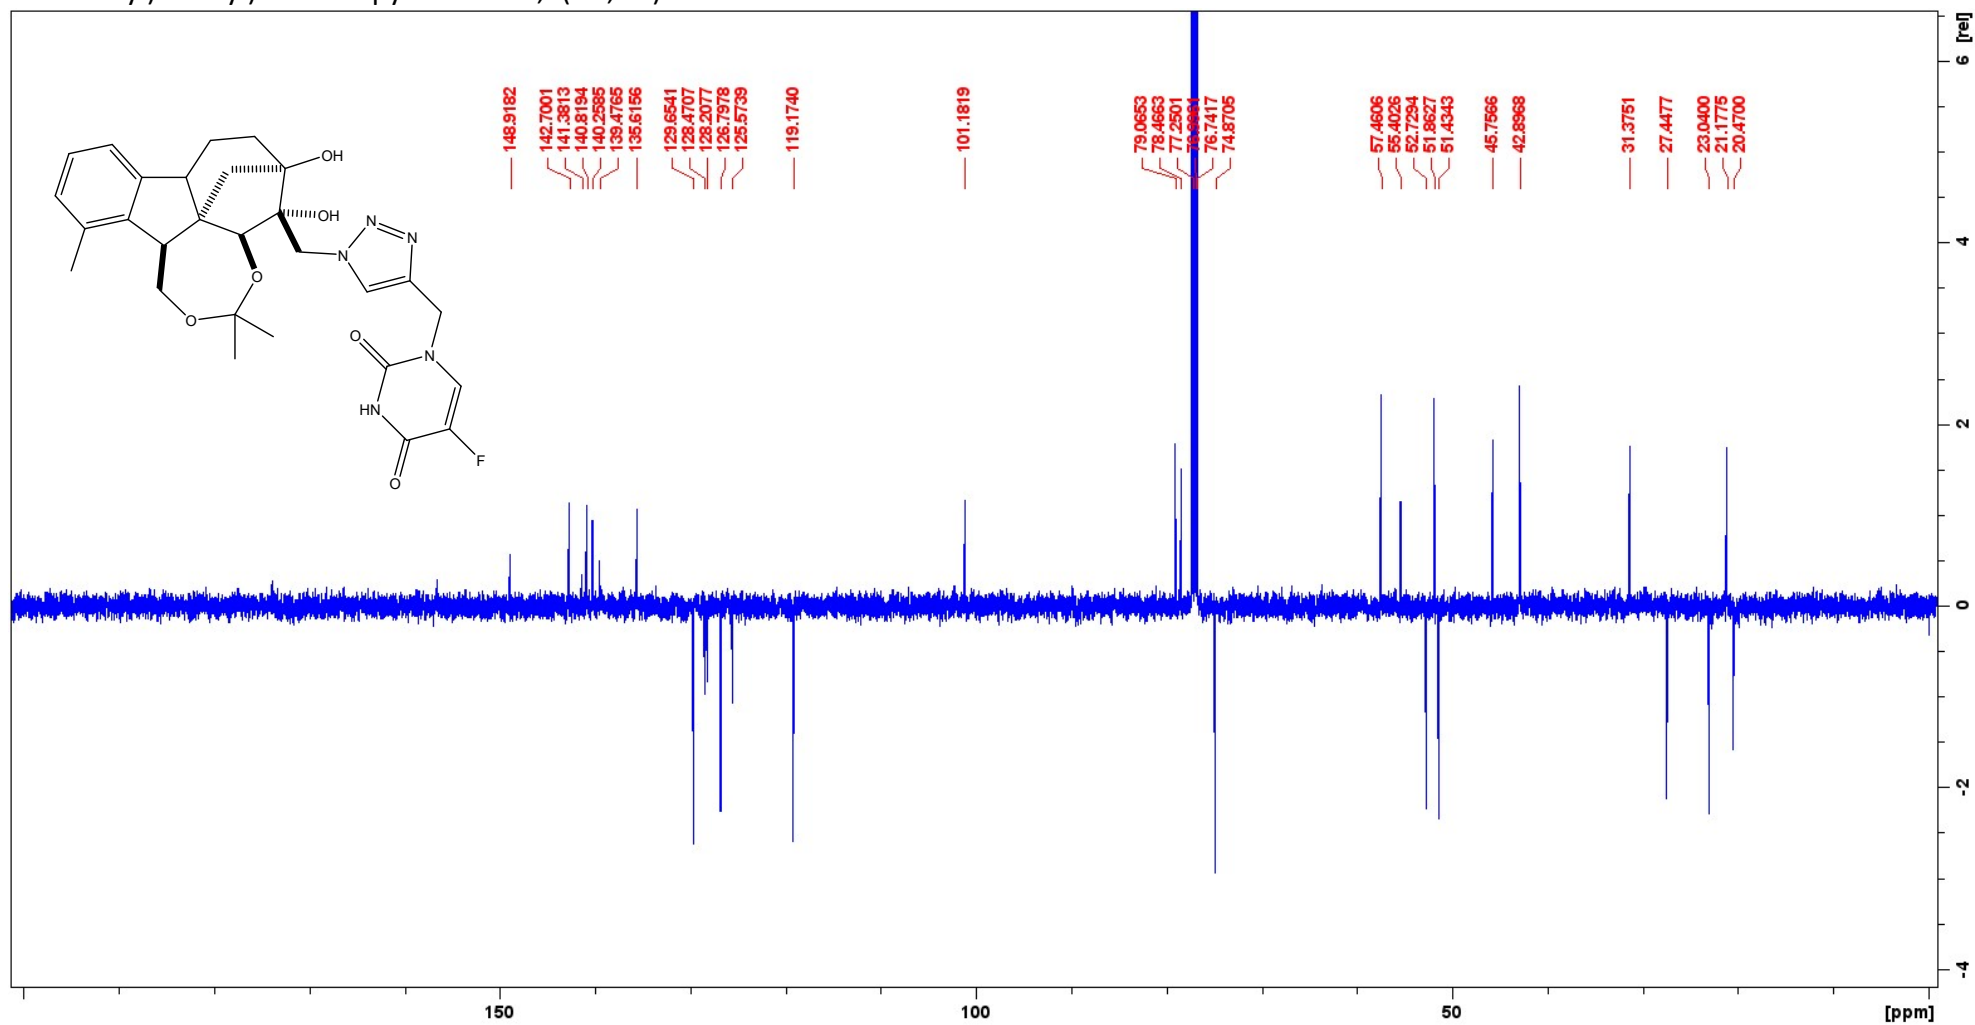

COSY of 1,4a,5,6,7,8,8a,12b-octahydro-4a<sup>1</sup>,6-methanobenzo[2,3]azuleno[8,1-de][1,3]dioxepin-5-yl)methyl)-1*H*-1,2,3-triazol-4-yl)methyl)-5-fluoropyrimidine-2,4(1*H*,3*H*)-dione **35**

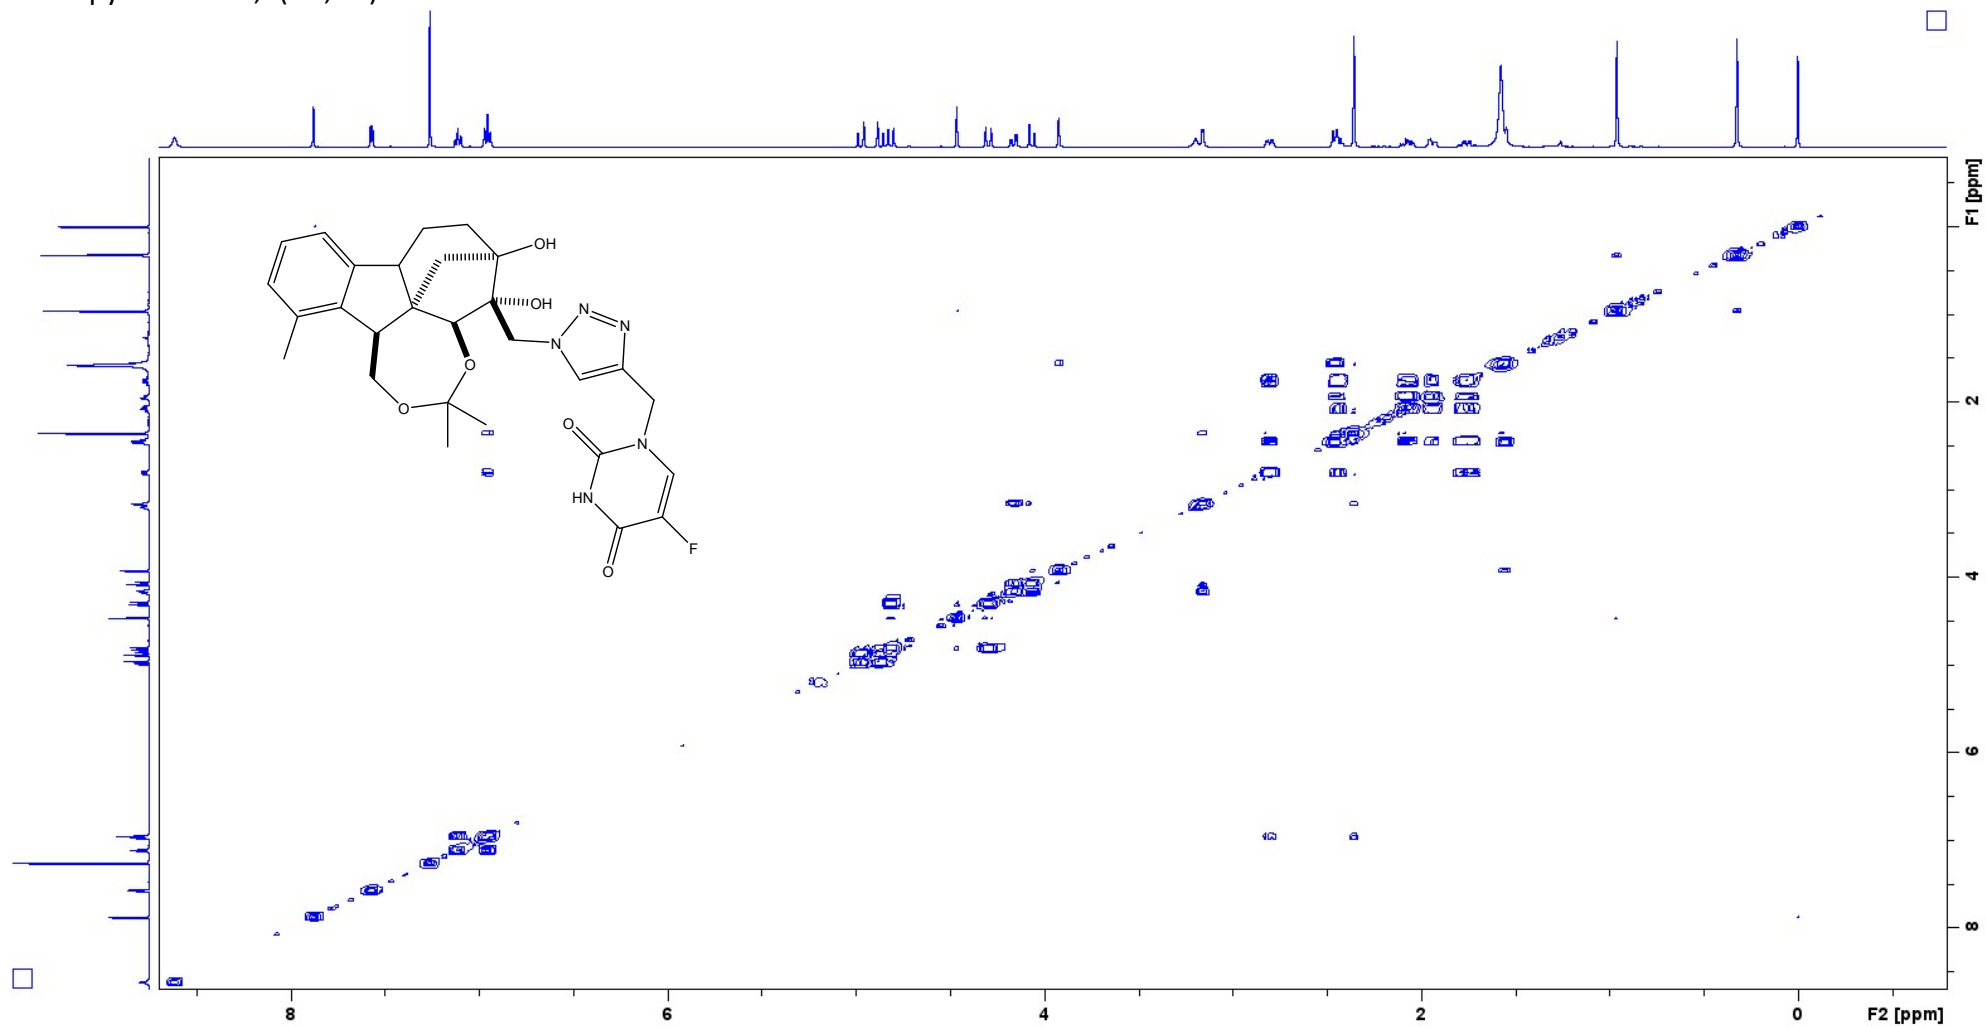

NOESY of 1,4a,5,6,7,8,8a,12b-octahydro-4a<sup>1</sup>,6-methanobenzo[2,3]azuleno[8,1-de][1,3]dioxepin-5-yl)methyl)-1*H*-1,2,3-triazol-4-yl)methyl)-5-fluoropyrimidine-2,4(1*H*,3*H*)-dione **35**

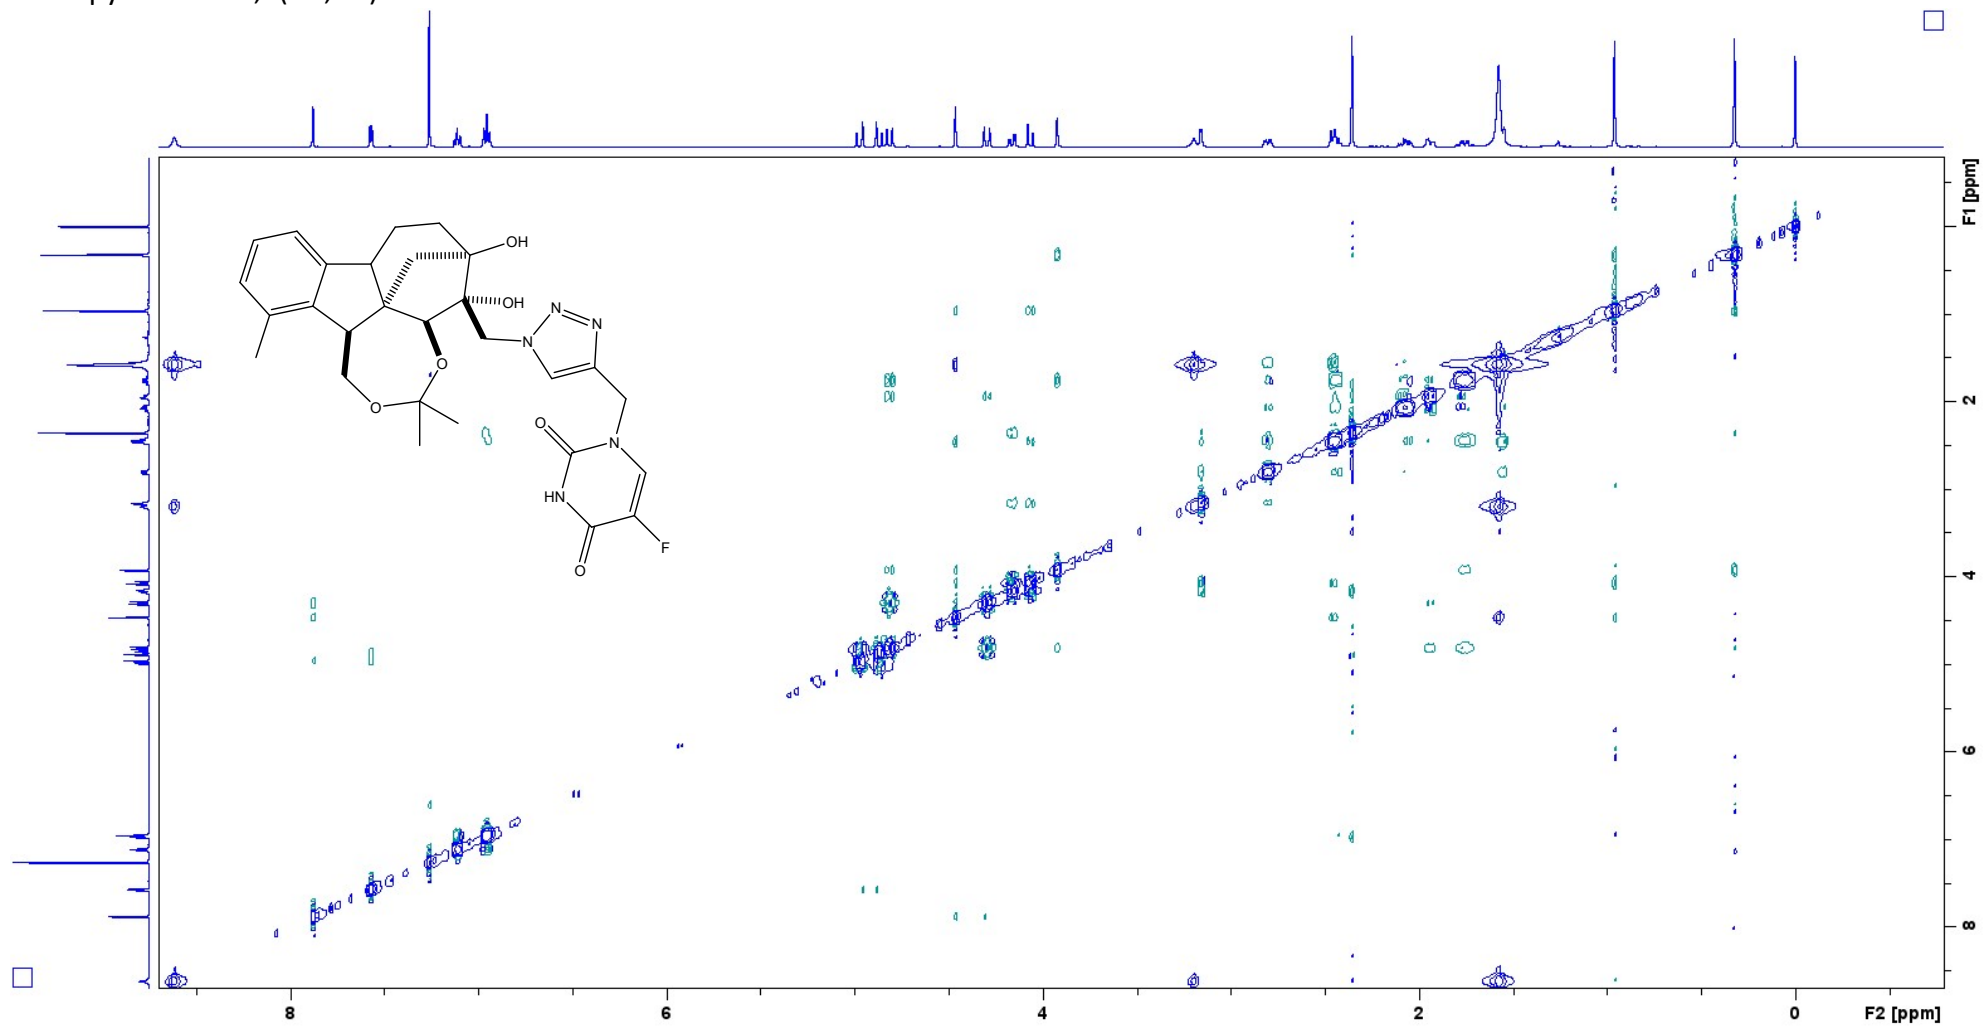



HSQC of 1,4a,5,6,7,8,8a,12b-octahydro-4a<sup>1</sup>,6-methanobenzo[2,3]azuleno[8,1-de][1,3]dioxepin-5-yl)methyl)-1*H*-1,2,3-triazol-4-yl)methyl)-5-fluoropyrimidine-2,4(1*H*,3*H*)-dione **35**

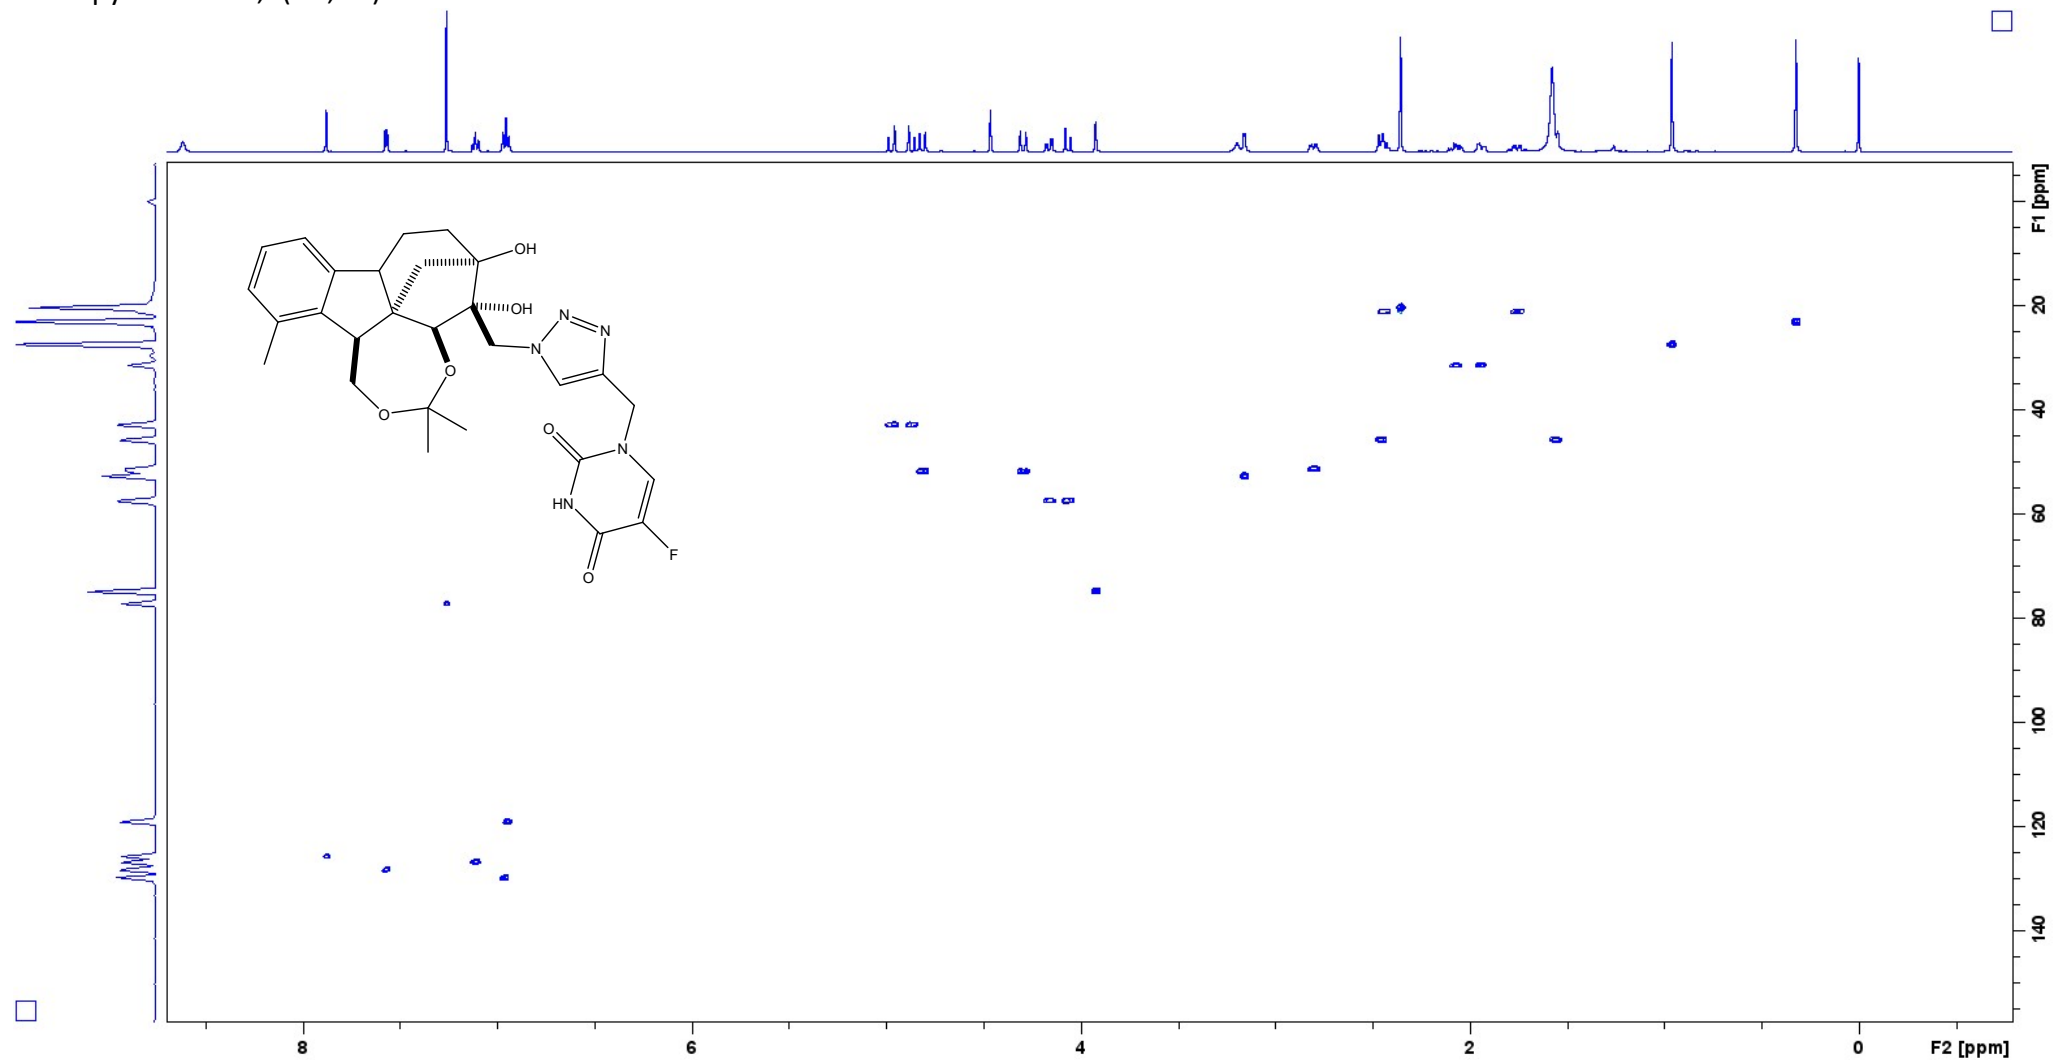

HMBC of 1,4a,5,6,7,8,8a,12b-octahydro-4a<sup>1</sup>,6-methanobenzo[2,3]azuleno[8,1-de][1,3]dioxepin-5-yl)methyl)-1*H*-1,2,3-triazol-4-yl)methyl)-5-fluoropyrimidine-2,4(1*H*,3*H*)-dione **35**

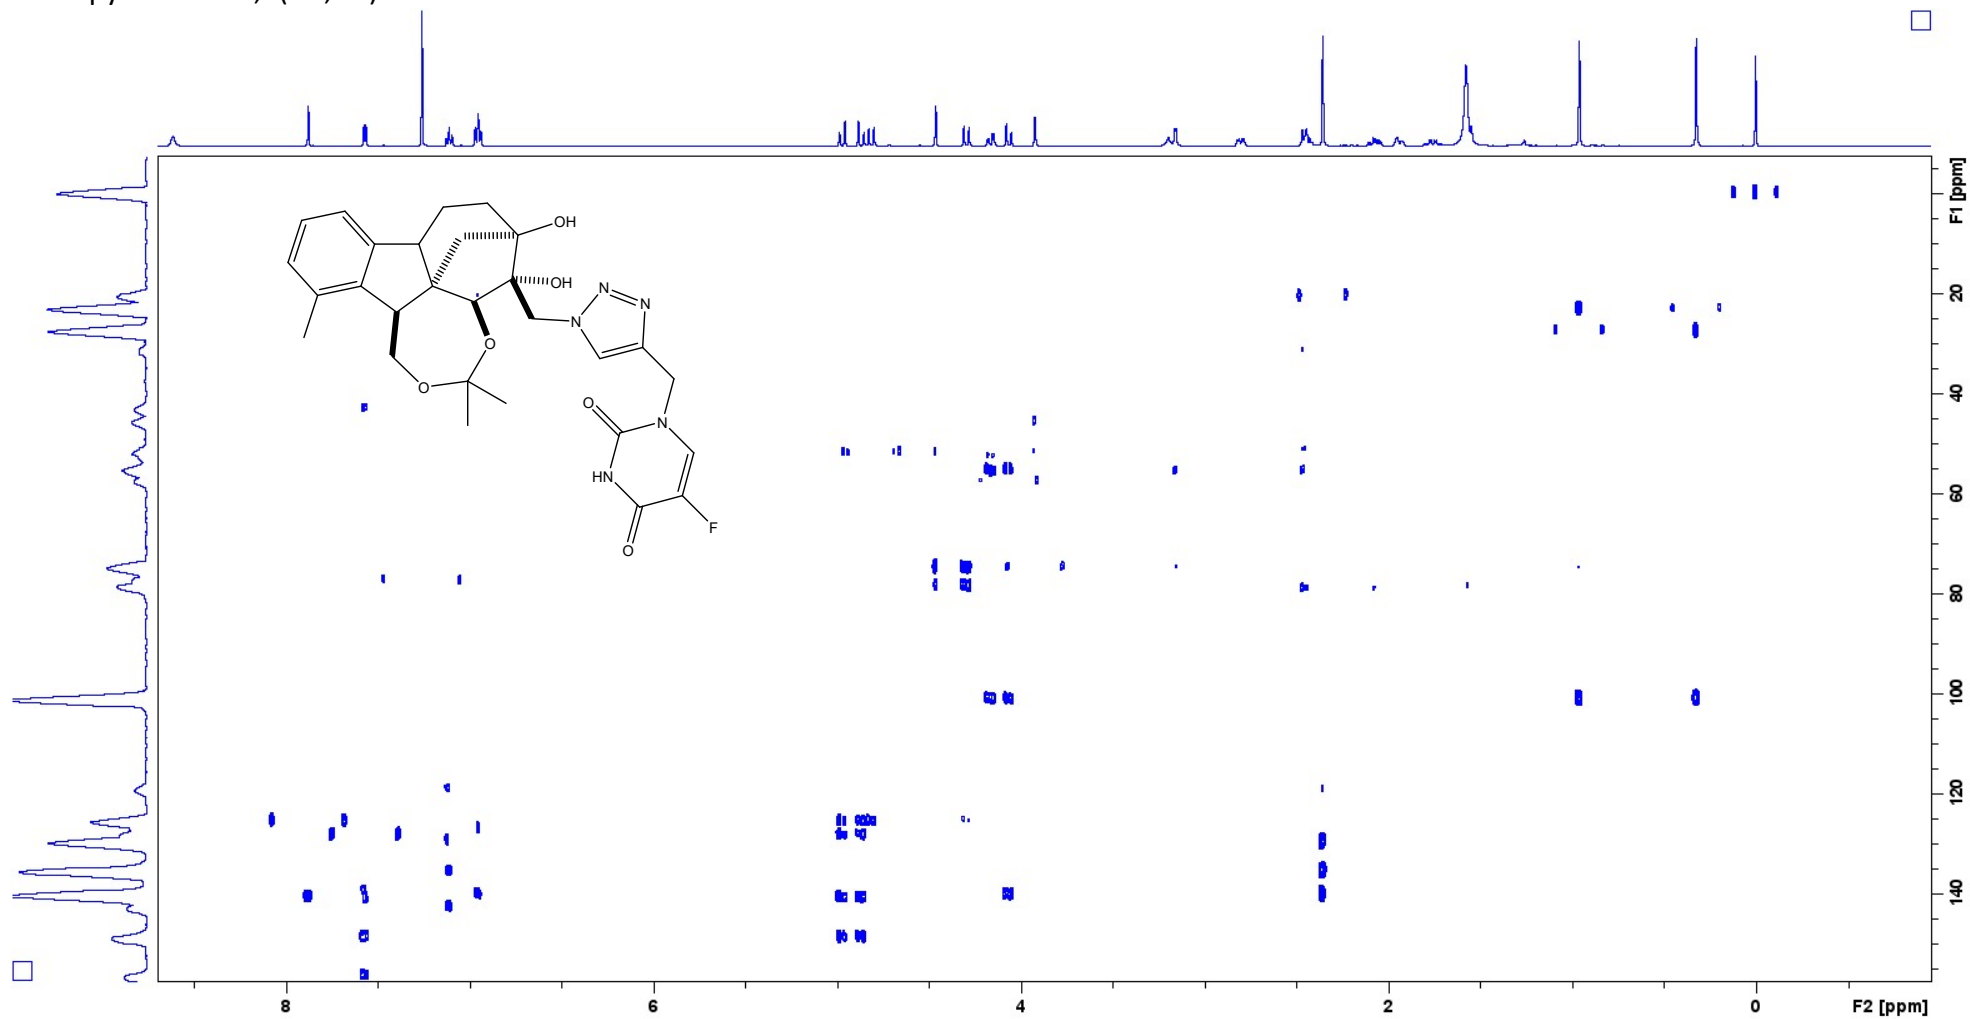

$^{19}\text{F}$  J-MOD NMR (470 MHz) of 1,4a,5,6,7,8,8a,12b-octahydro-4a<sup>1</sup>,6-methanobenzo[2,3]azuleno[8,1-de][1,3]dioxepin-5-yl)methyl)-1*H*-1,2,3-triazol-4-yl)methyl)-5-fluoropyrimidine-2,4(1*H*,3*H*)-dione **35**

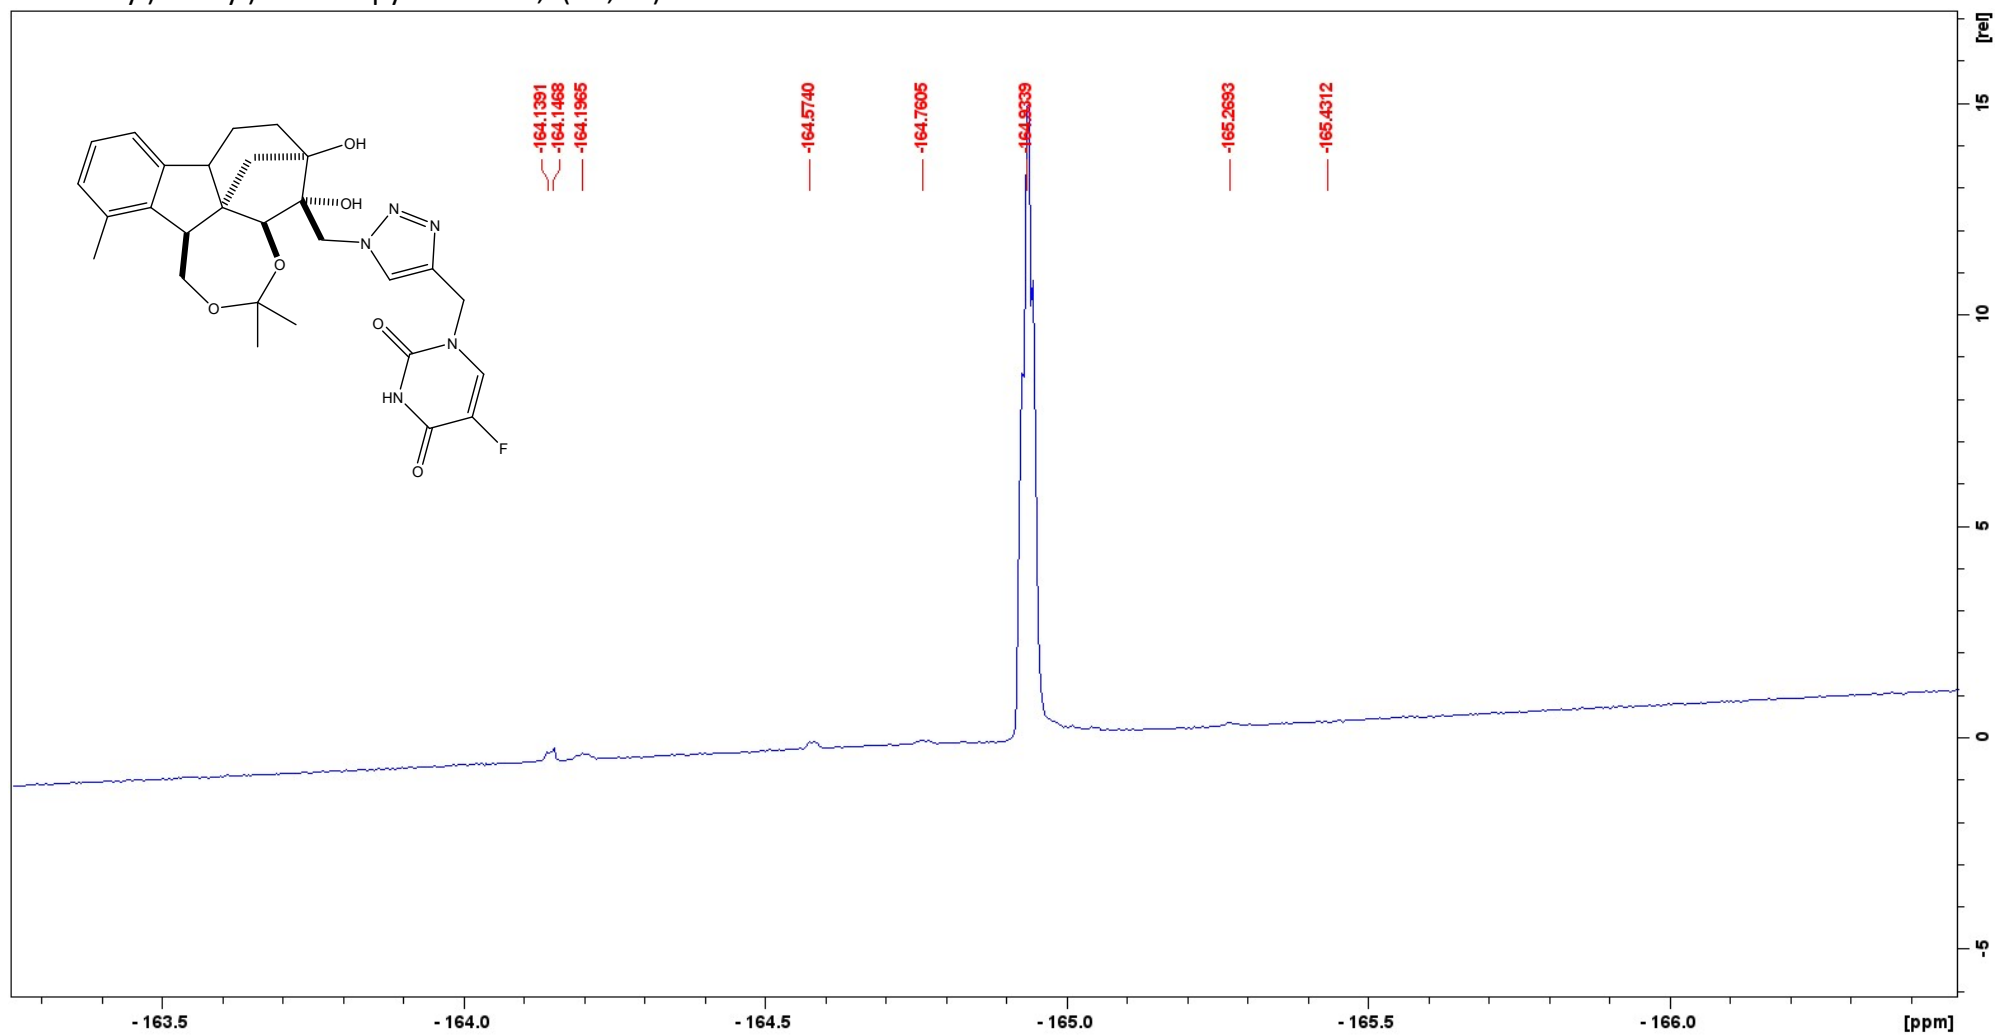

$^1\text{H-NMR}$  (500 MHz) of *N*-Benzyl-1-((7*S*,8*R*,9*S*,9*aR*,10*S*)-7,8,9-trihydroxy-10-(hydroxymethyl)-1-methyl-4*b*,6,7,8,9,10-hexahydro-5*H*-7,9a-methanobenzo[*a*]azulen-8-yl)methanaminium chloride **19**

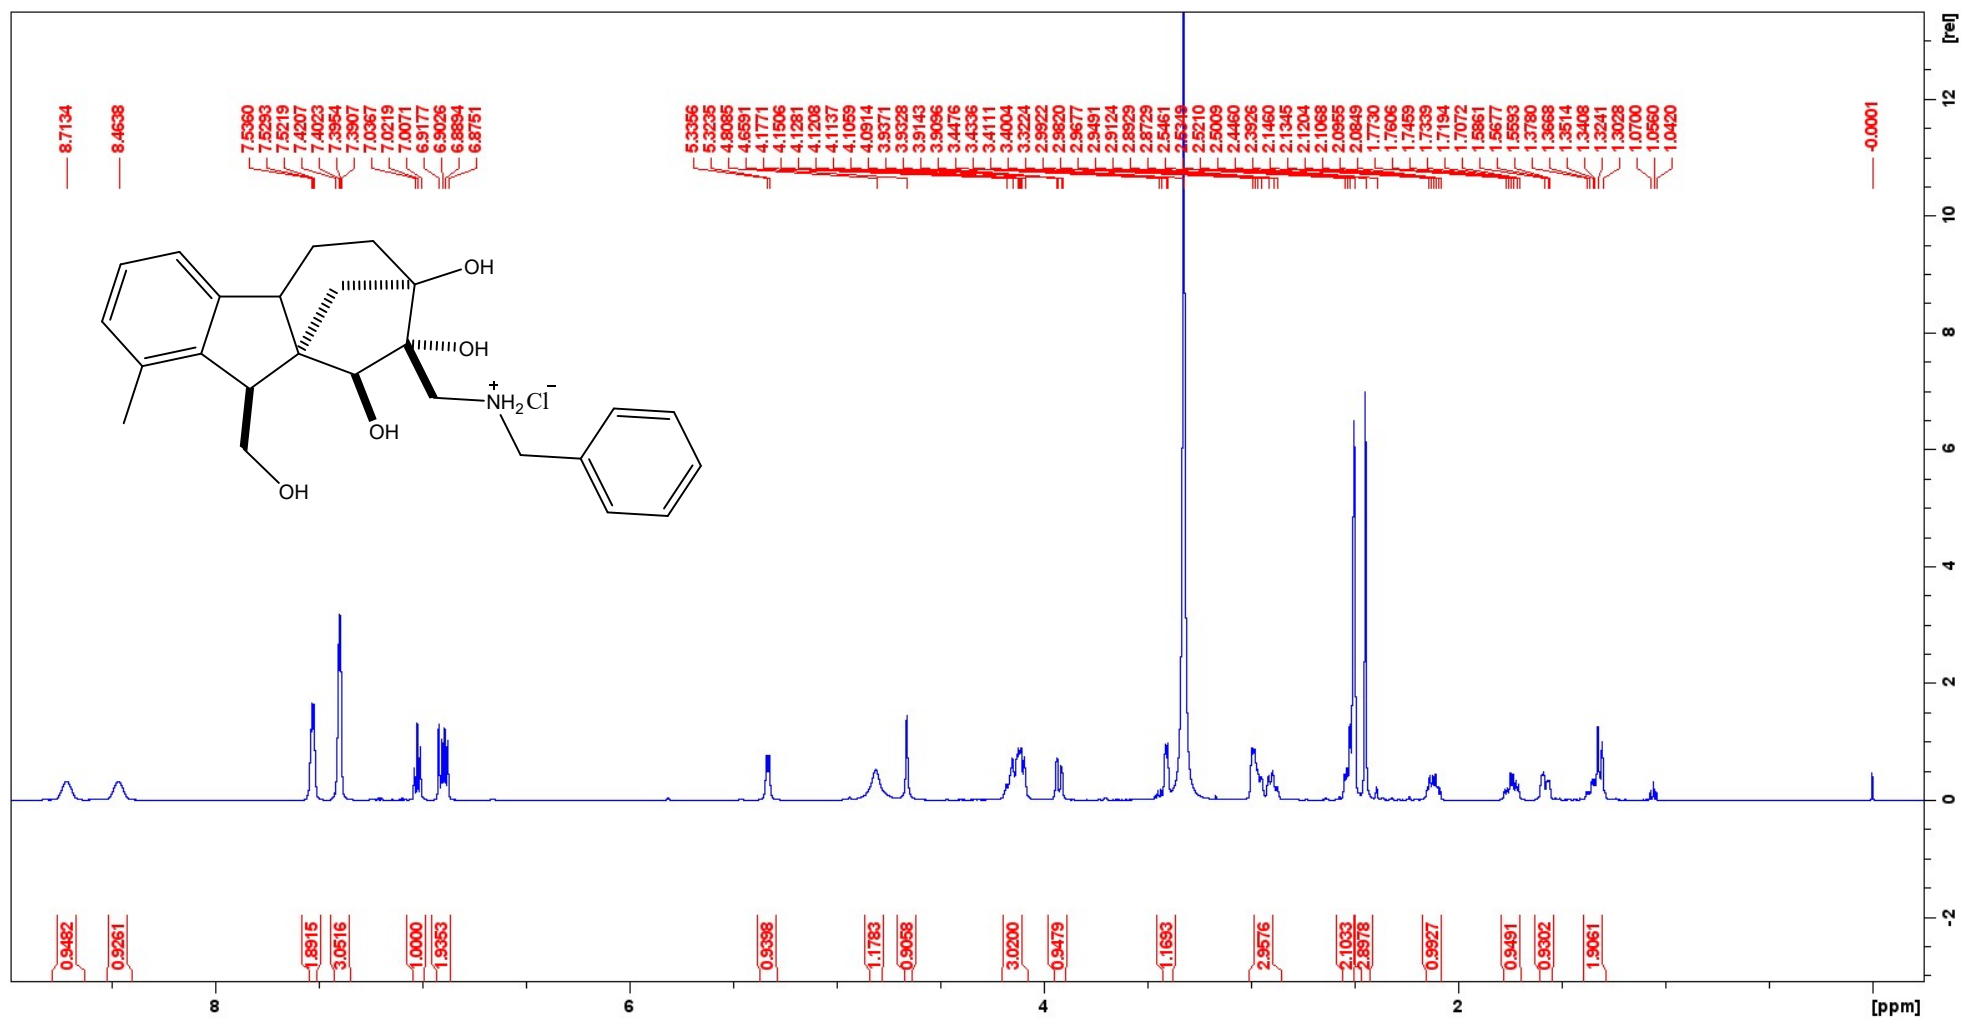

$^{13}\text{C}\{^1\text{H}\}$  J-MOD NMR (125 MHz) of *N*-Benzyl-1-((7*S*,8*R*,9*S*,9*aR*,10*S*)-7,8,9-trihydroxy-10-(hydroxymethyl)-1-methyl-4b,6,7,8,9,10-hexahydro-5*H*-7,9a-methanobenzo[*a*]azulen-8-yl)methanaminium chloride **19**

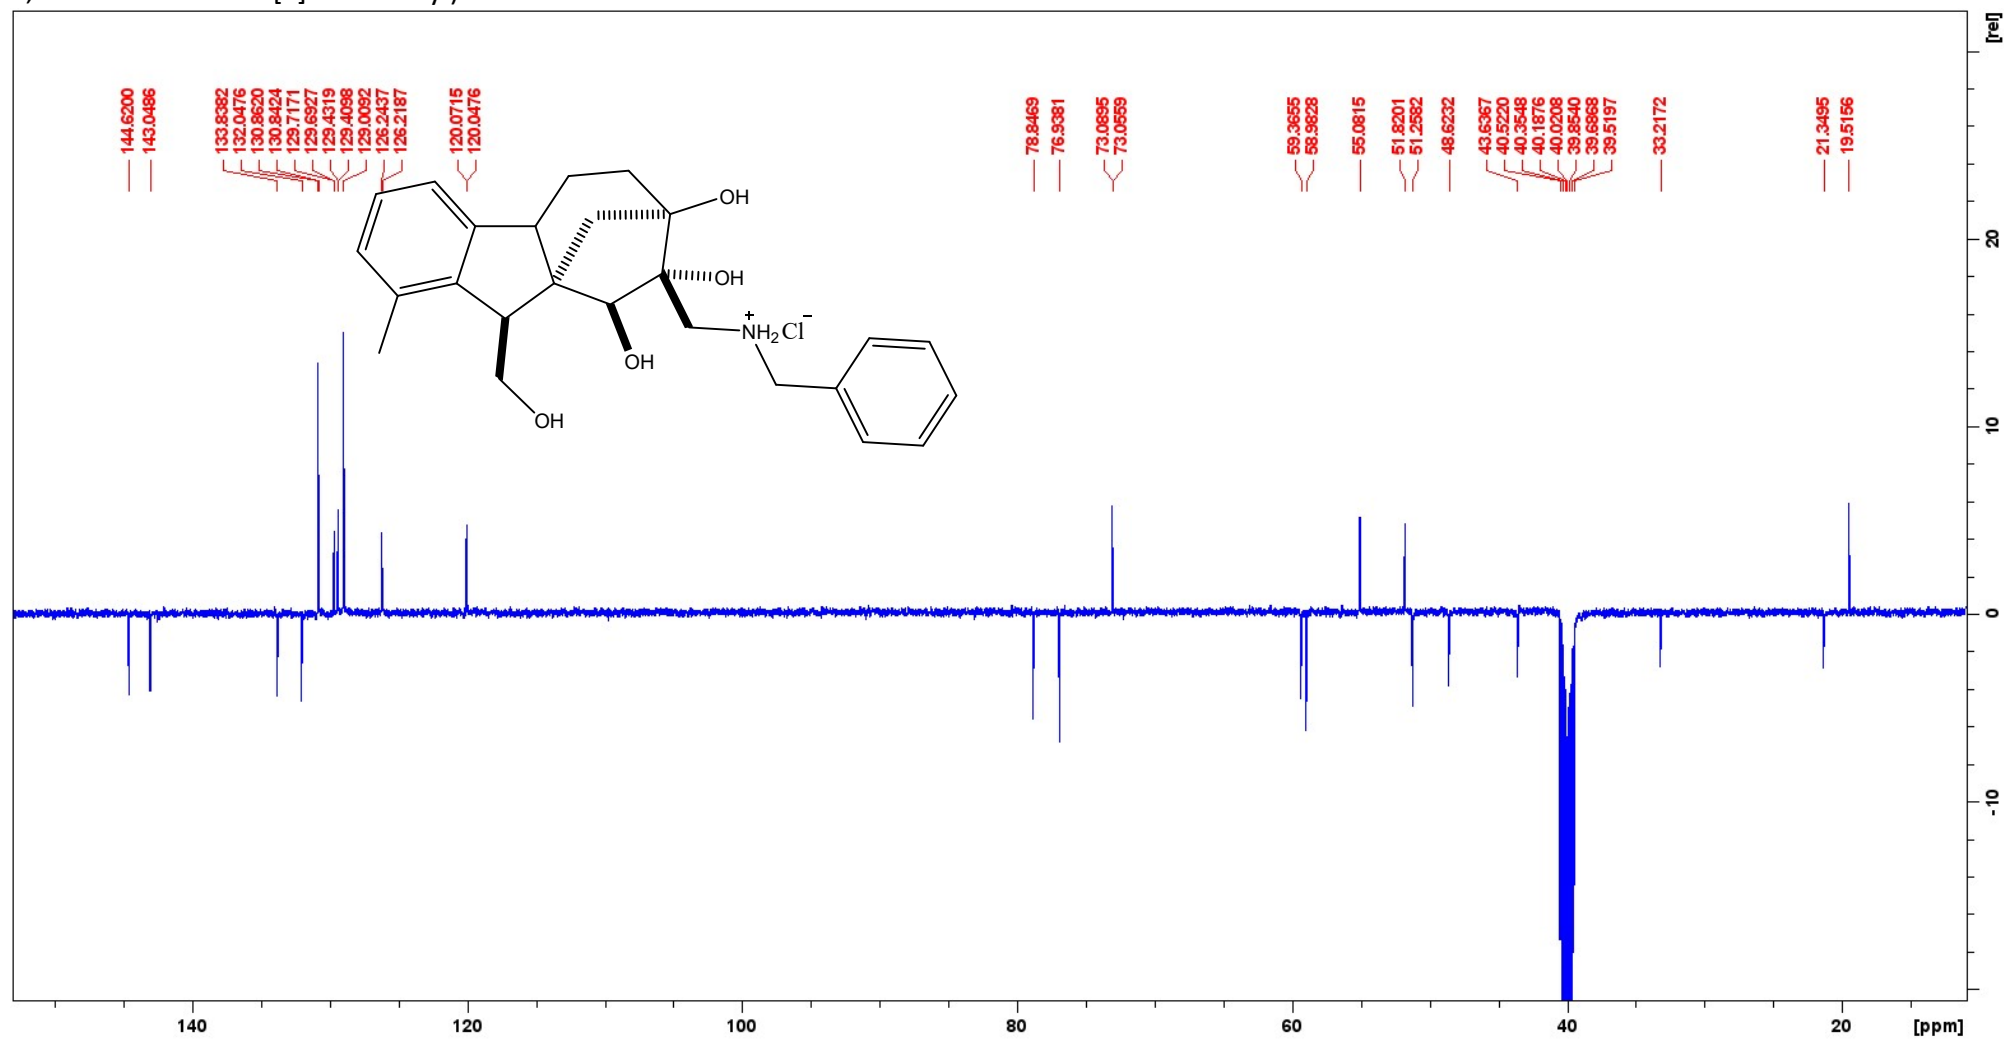

COSY of *N*-Benzyl-1-((7*S*,8*R*,9*S*,9*aR*,10*S*)-7,8,9-trihydroxy-10-(hydroxymethyl)-1-methyl-4*b*,6,7,8,9,10-hexahydro-5*H*-7,9a-methanobenzo[*a*]azulen-8-yl)methanaminium chloride **19**

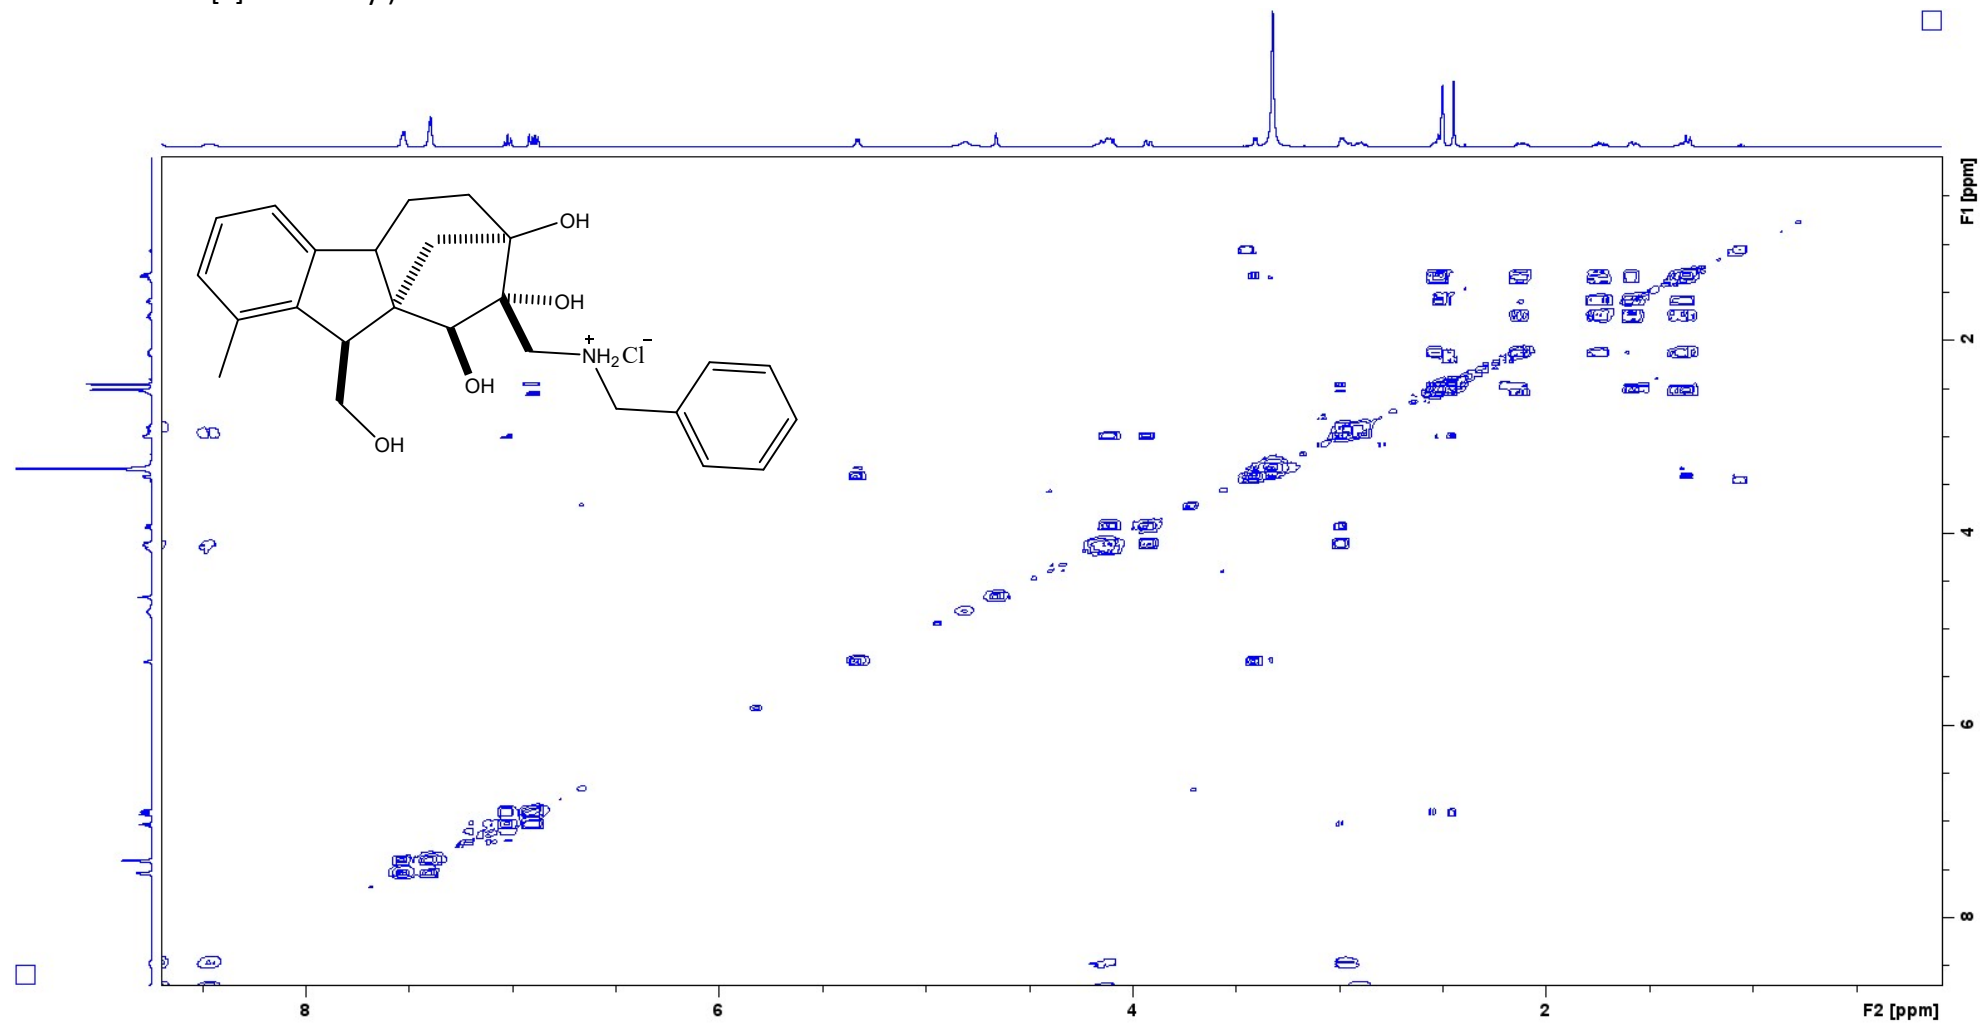

NOESY of *N*-Benzyl-1-((7*S*,8*R*,9*S*,9*aR*,10*S*)-7,8,9-trihydroxy-10-(hydroxymethyl)-1-methyl-4*b*,6,7,8,9,10-hexahydro-5*H*-7,9*a*-methanobenzo[*a*]azulen-8-yl)methanaminium chloride **19**

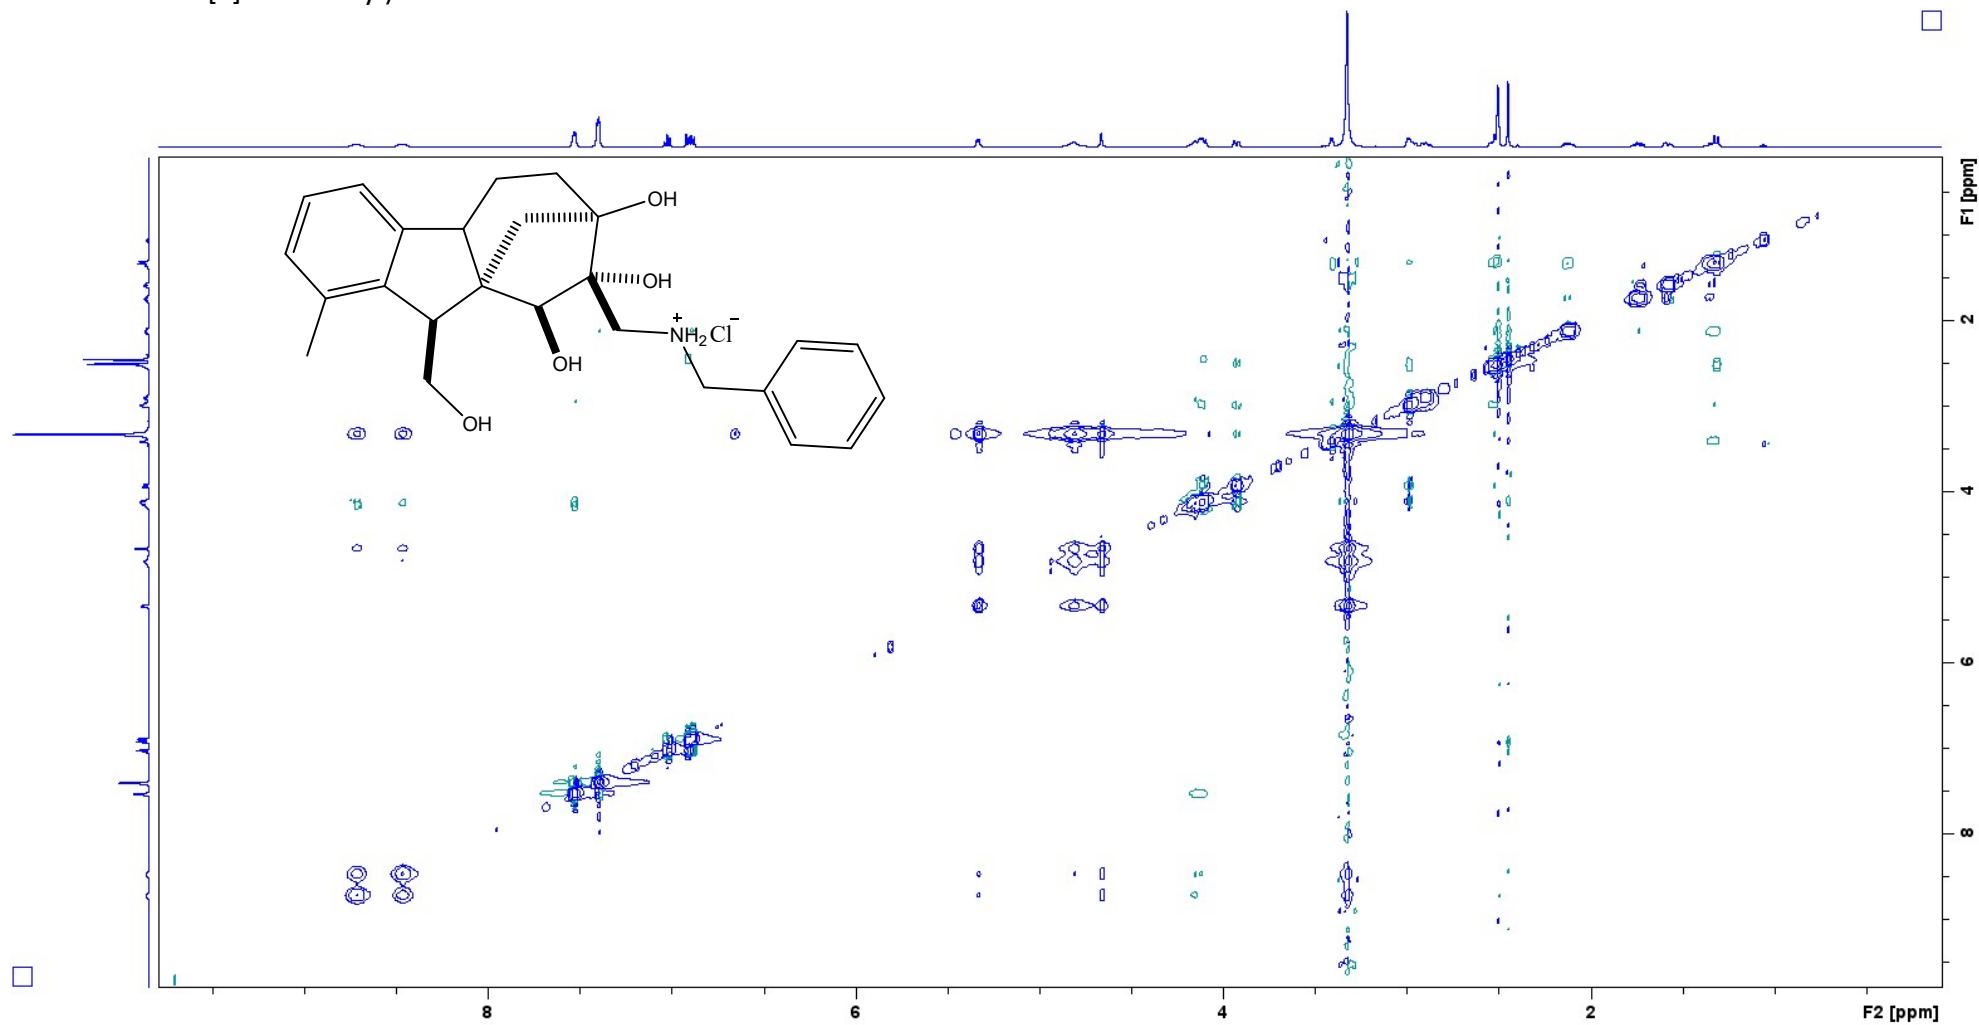

HSQC of *N*-Benzyl-1-((7*S*,8*R*,9*S*,9*aR*,10*S*)-7,8,9-trihydroxy-10-(hydroxymethyl)-1-methyl-4*b*,6,7,8,9,10-hexahydro-5*H*-7,9a-methanobenzo[*a*]azulen-8-yl)methanaminium chloride **19**

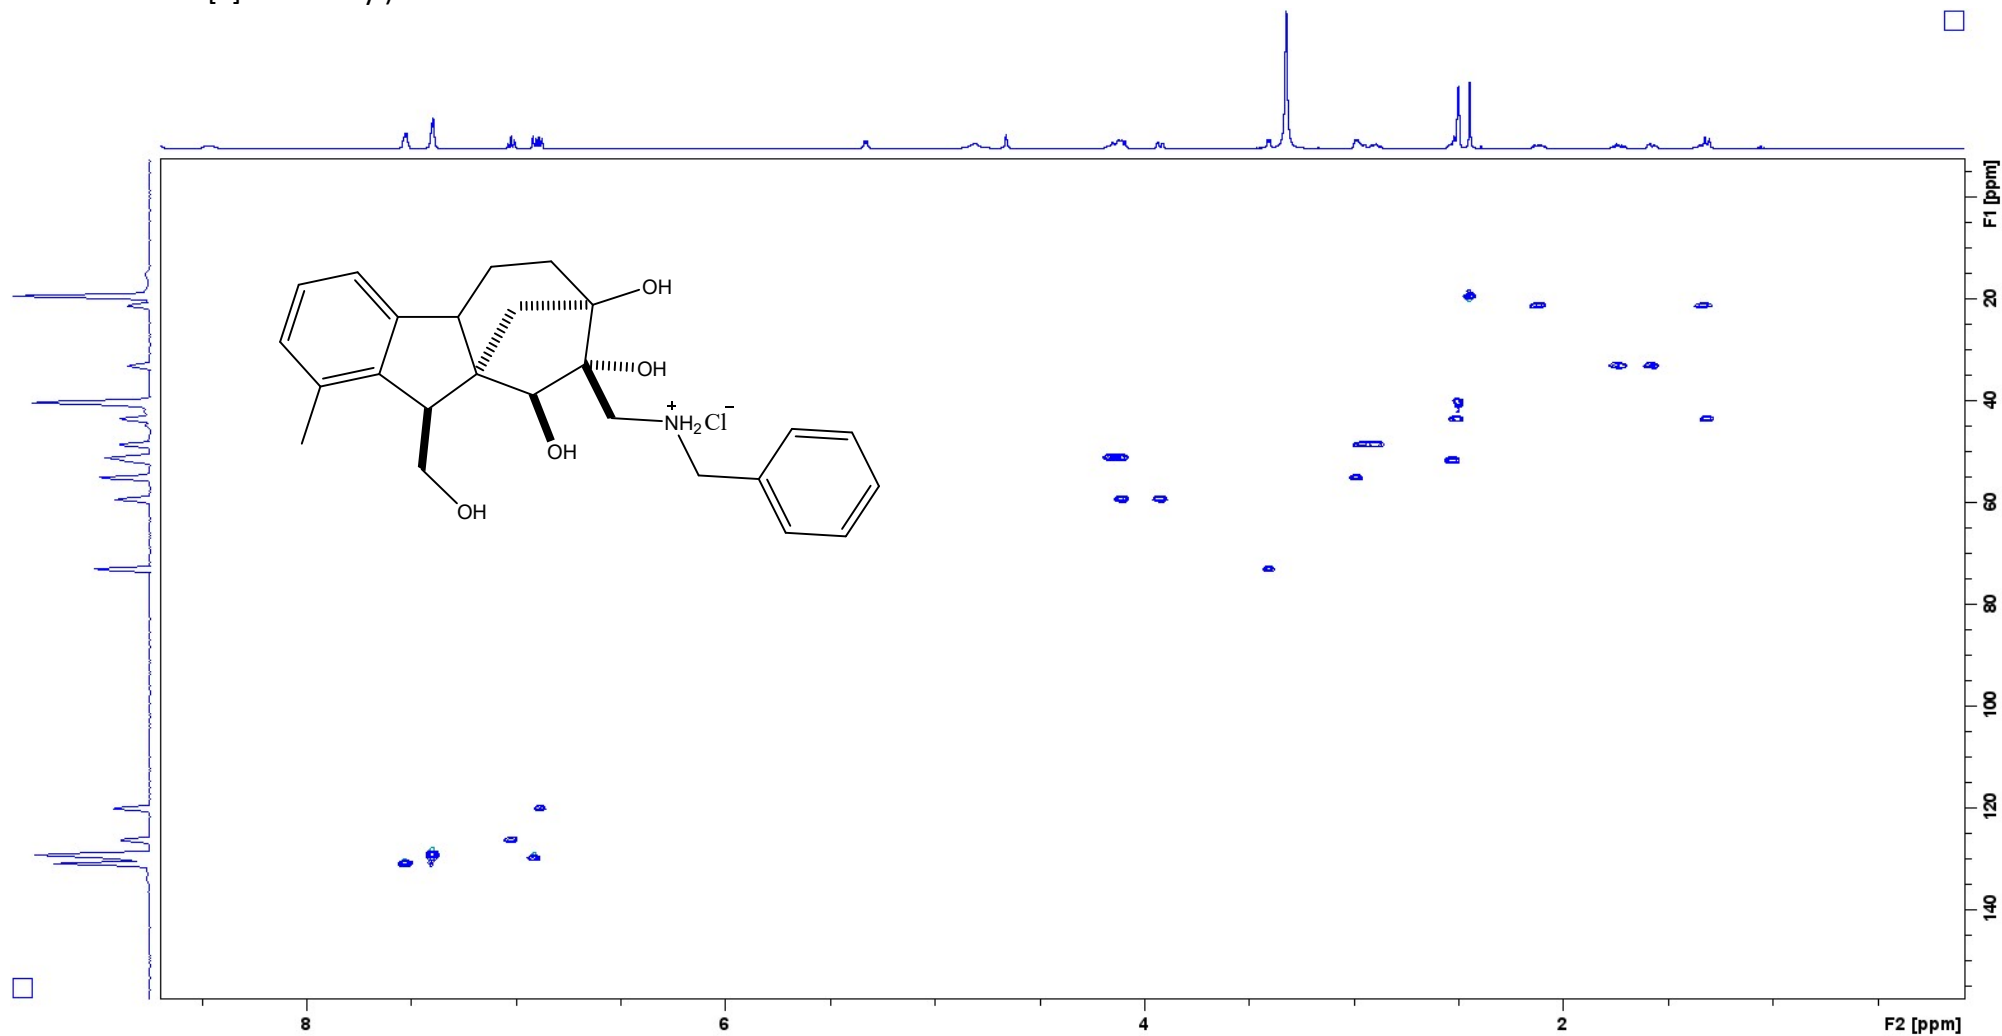



HMBC of *N*-Benzyl-1-((7*S*,8*R*,9*S*,9*aR*,10*S*)-7,8,9-trihydroxy-10-(hydroxymethyl)-1-methyl-4*b*,6,7,8,9,10-hexahydro-5*H*-7,9*a*-methanobenzo[*a*]azulen-8-yl)methanaminium chloride **19**

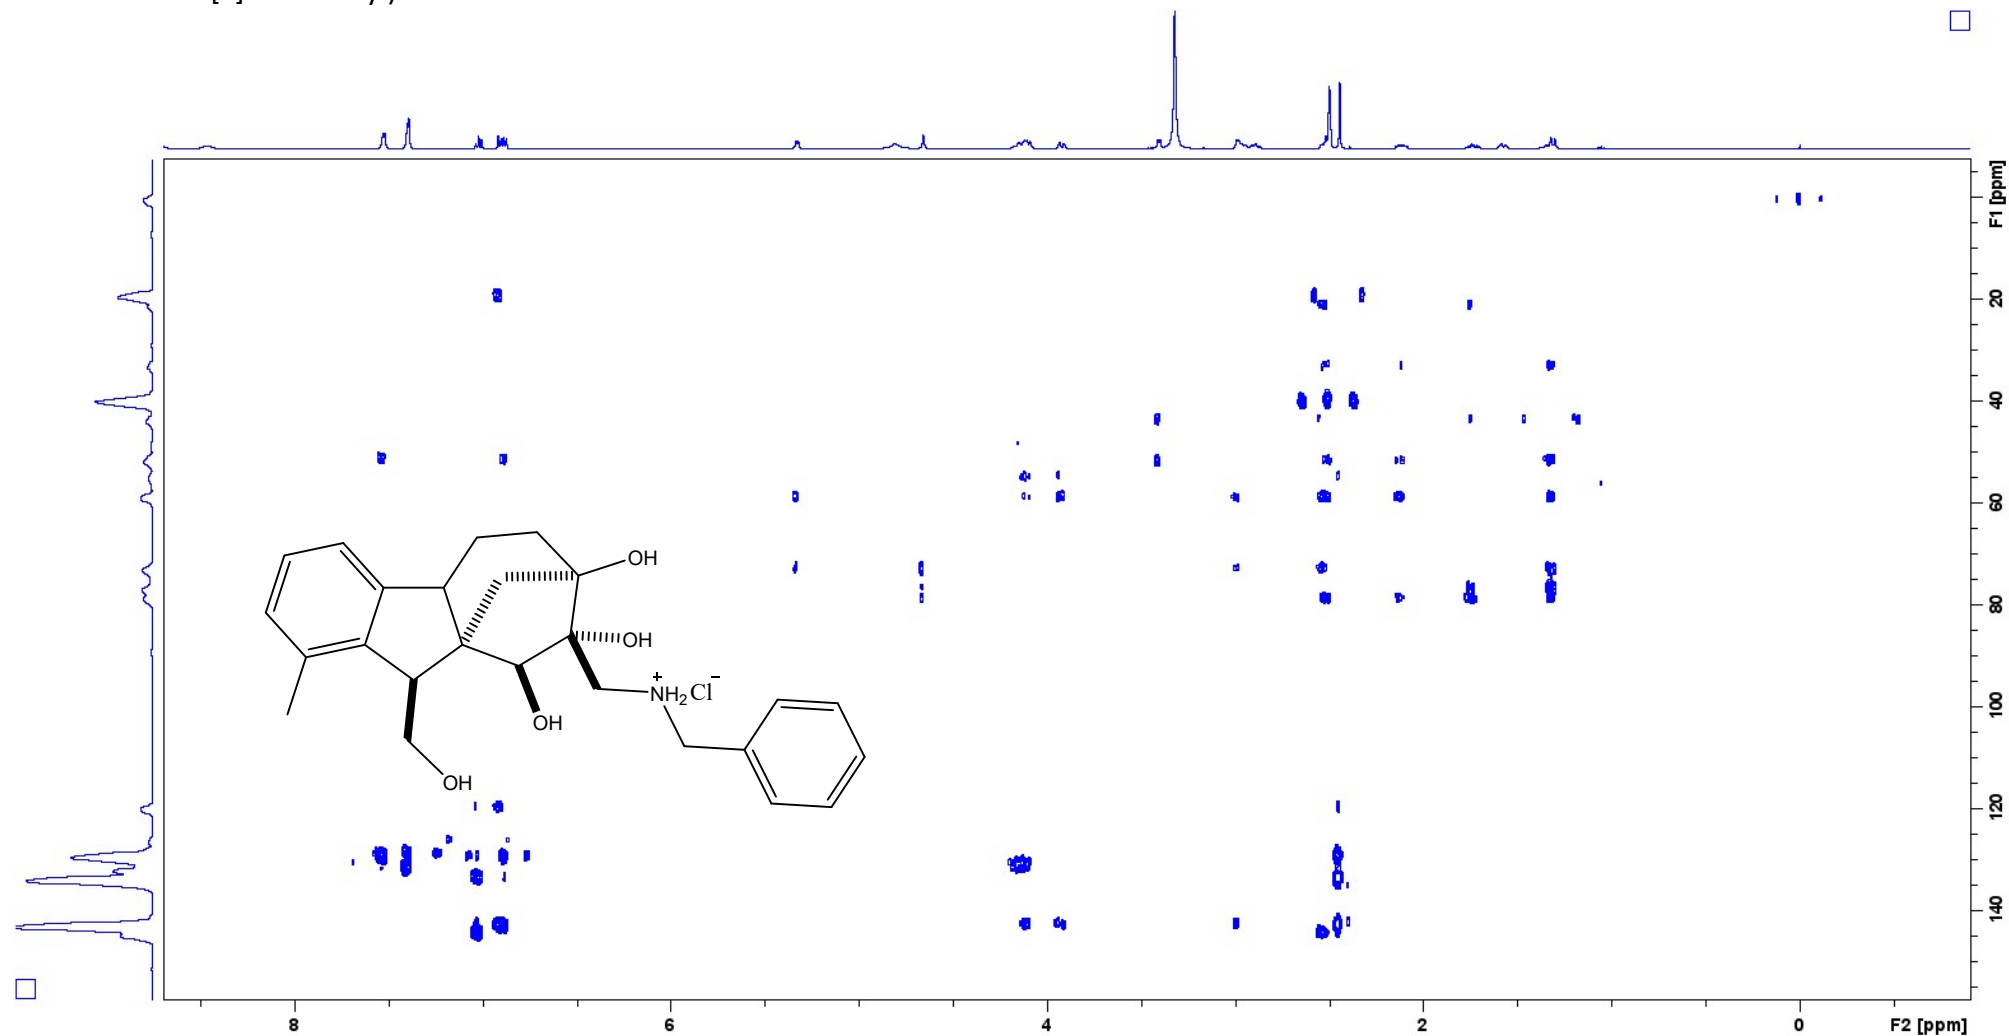

$^1\text{H-NMR}$  (500 MHz) of *N*-(4-Fluorobenzyl)-1-((7*S*,8*R*,9*S*,9*aR*,10*S*)-7,8,9-trihydroxy-10-(hydroxymethyl)-1-methyl-4b,6,7,8,9,10-hexahydro-5*H*-7,9a-methanobenzo[*a*]azulen-8-yl)methanaminium **20**

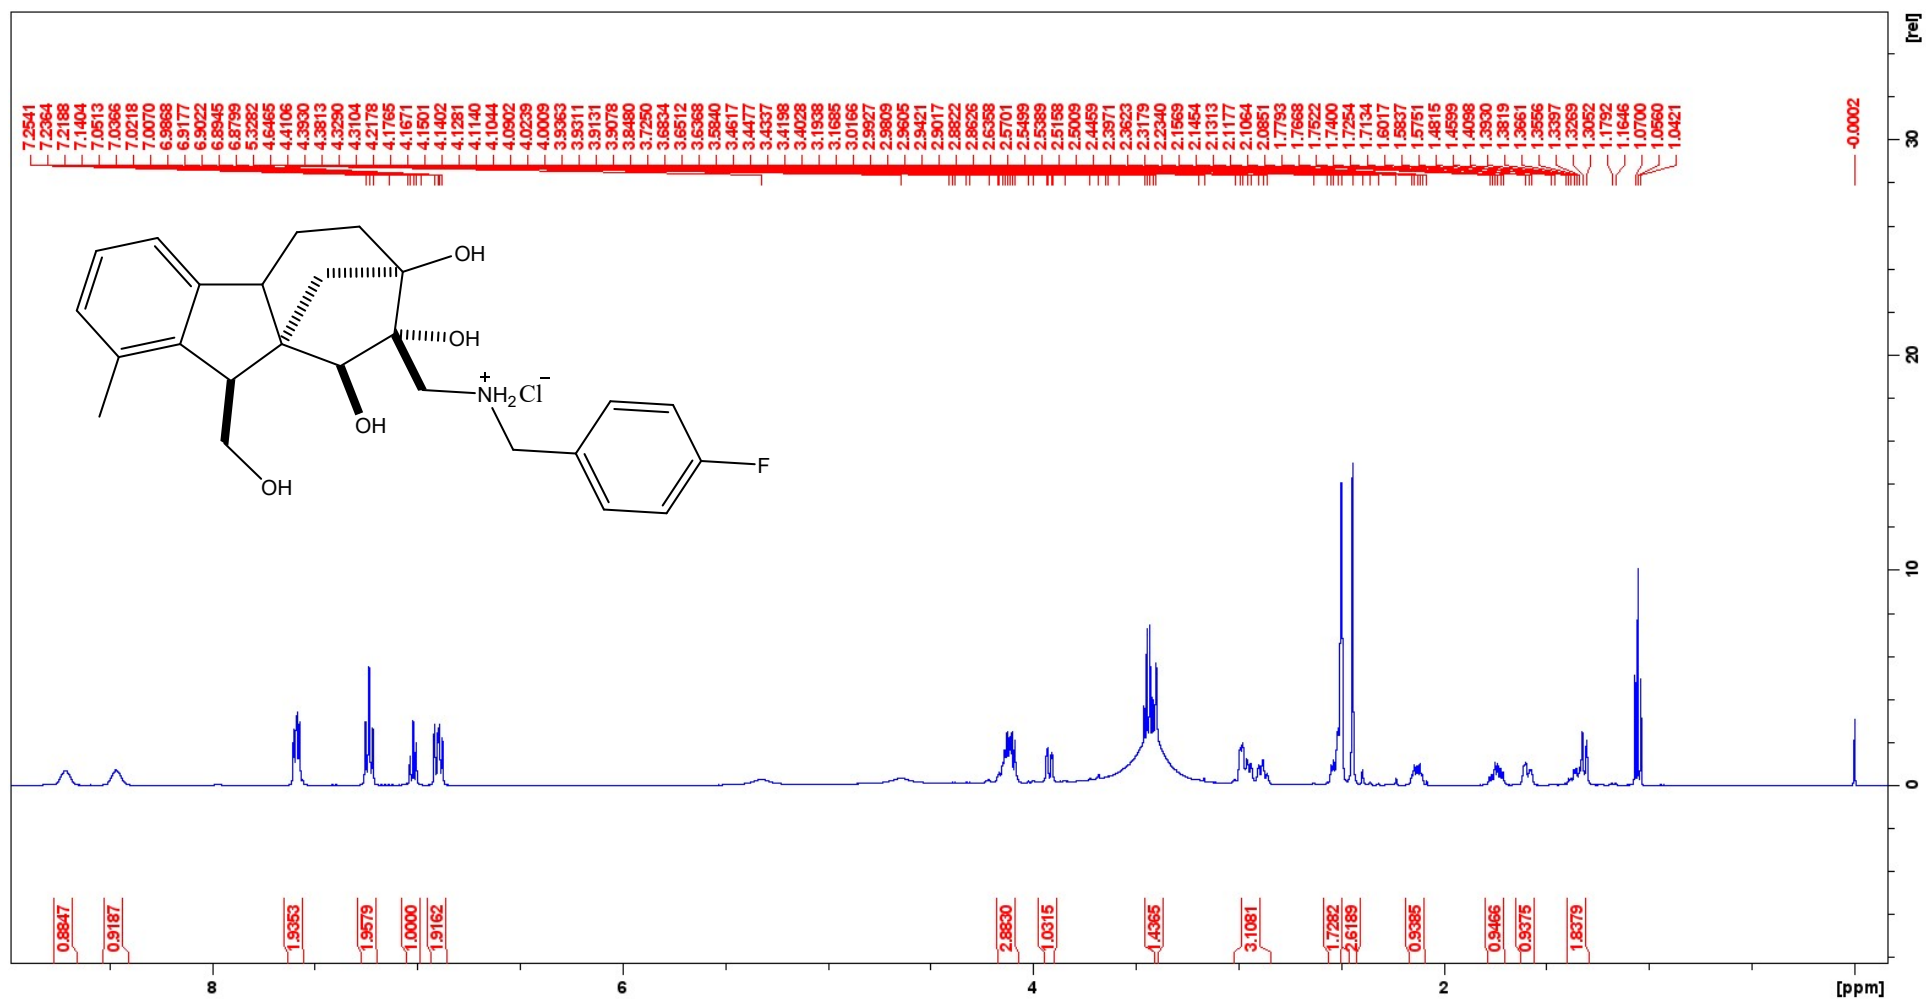

$^{13}\text{C}\{^1\text{H}\}$  J-MOD NMR (125 MHz) of *N*-(4-Fluorobenzyl)-1-((7*S*,8*R*,9*S*,9*aR*,10*S*)-7,8,9-trihydroxy-10-(hydroxymethyl)-1-methyl-4*b*,6,7,8,9,10-hexahydro-5*H*-7,9*a*-methanobenzo[*a*]azulen-8-yl)methanaminium **20**

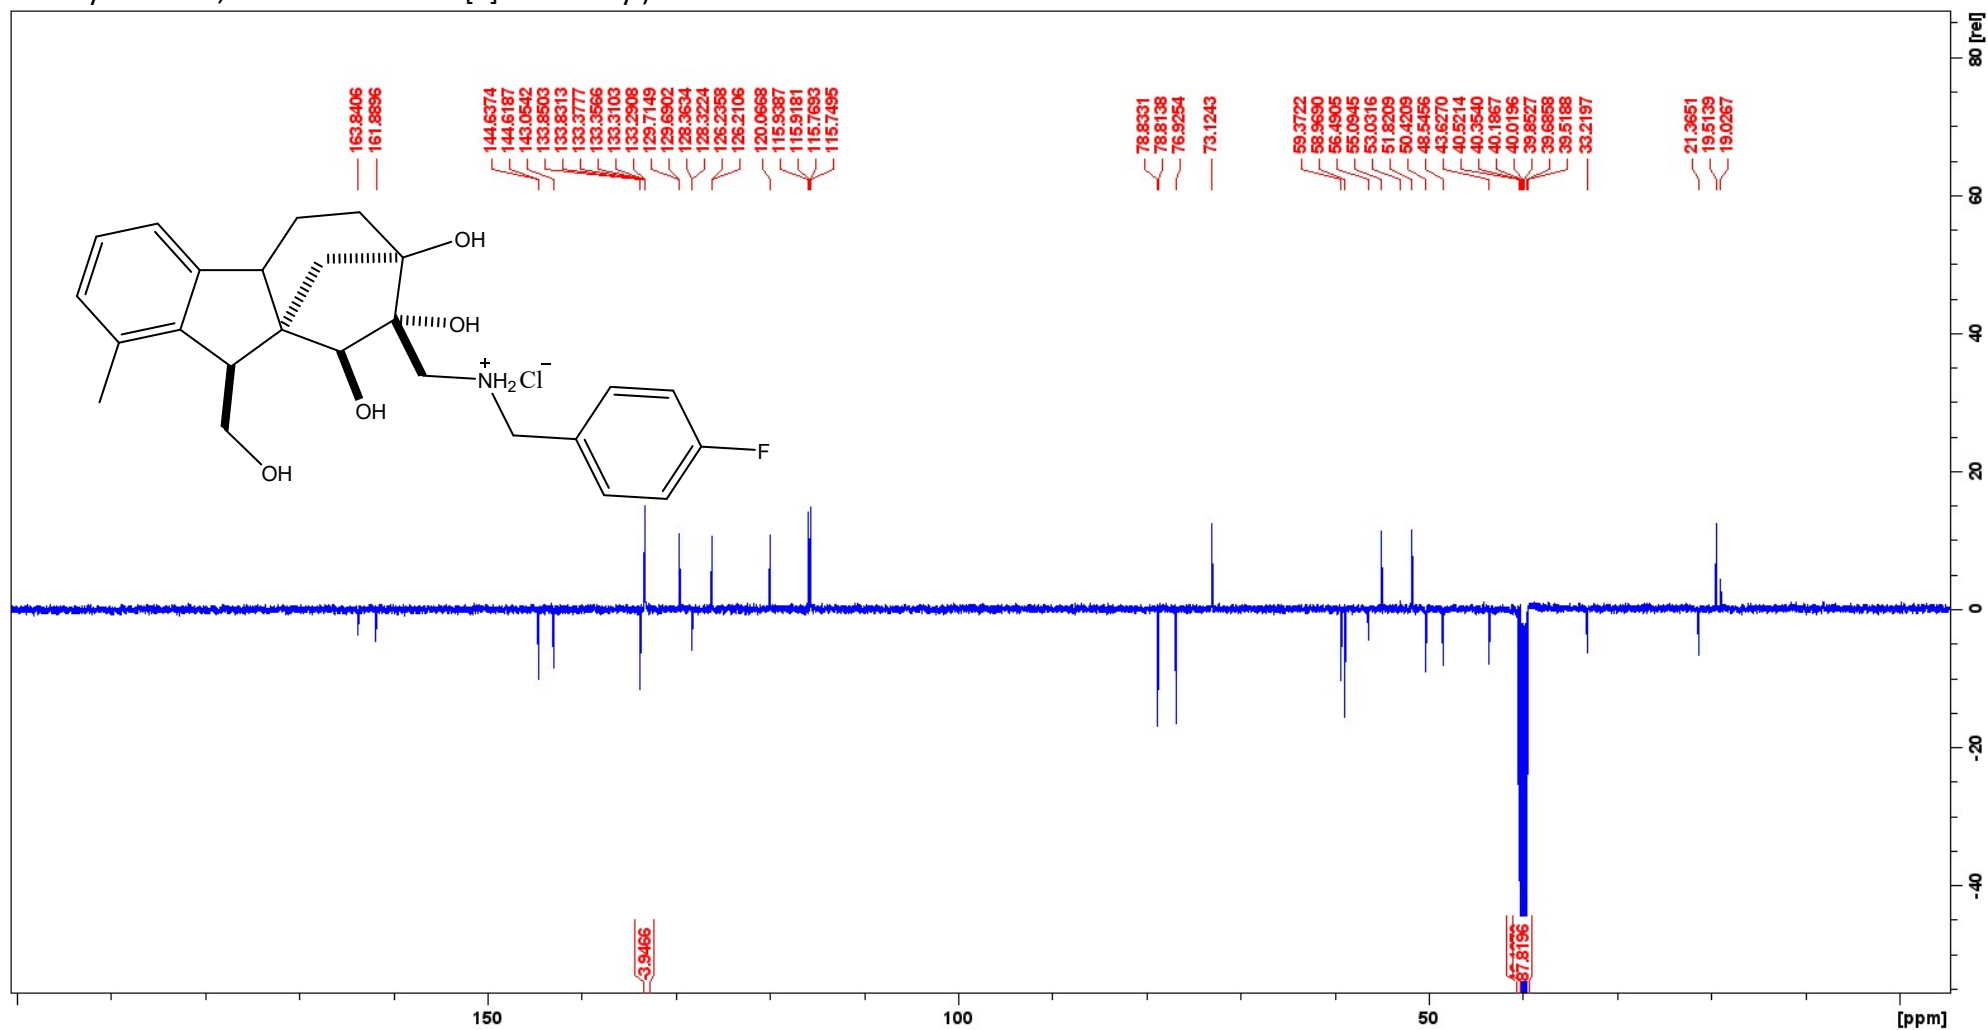

CSOY of *N*-(4-Fluorobenzyl)-1-((7*S*,8*R*,9*S*,9*aR*,10*S*)-7,8,9-trihydroxy-10-(hydroxymethyl)-1-methyl-4*b*,6,7,8,9,10-hexahydro-5*H*-7,9a-methanobenzo[*a*]azulen-8-yl)methanaminium **20**

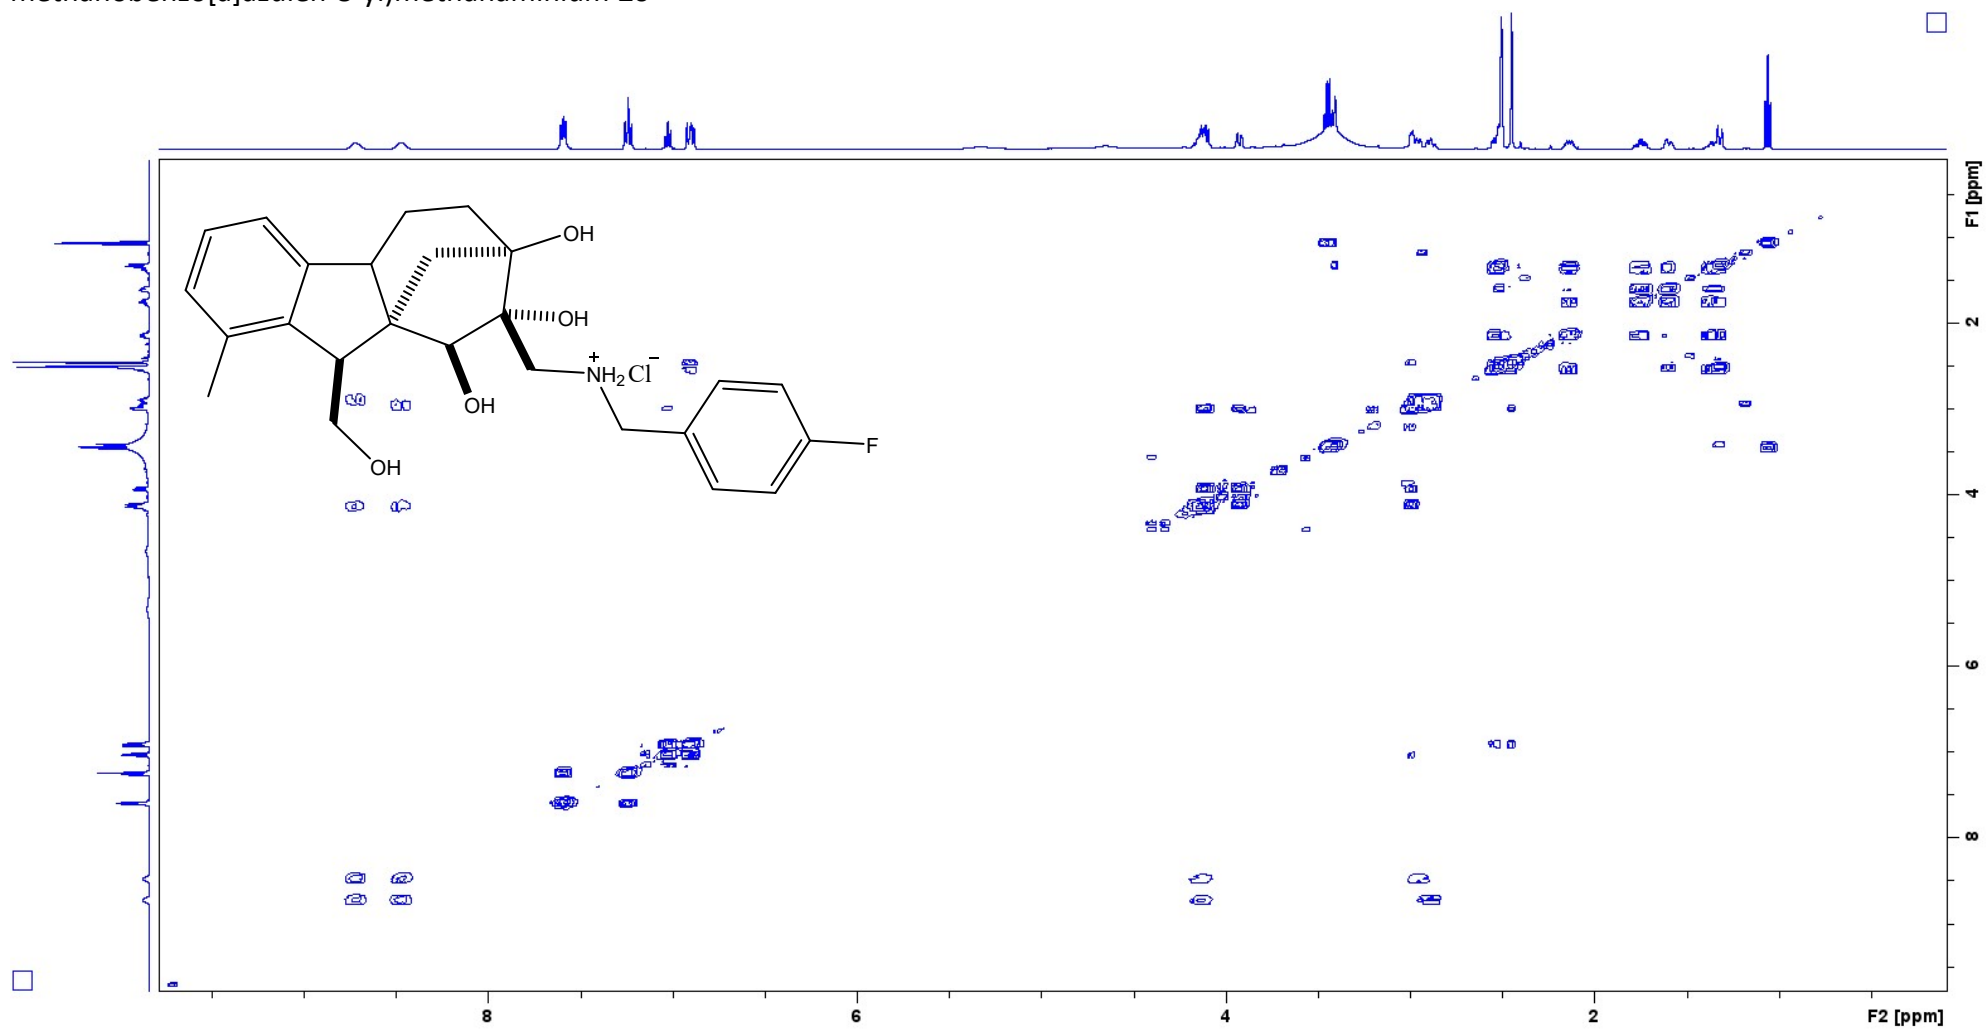

NOESY of *N*-(4-Fluorobenzyl)-1-((7*S*,8*R*,9*S*,9*aR*,10*S*)-7,8,9-trihydroxy-10-(hydroxymethyl)-1-methyl-4*b*,6,7,8,9,10-hexahydro-5*H*-7,9a-methanobenzo[*a*]azulen-8-yl)methanaminium **20**

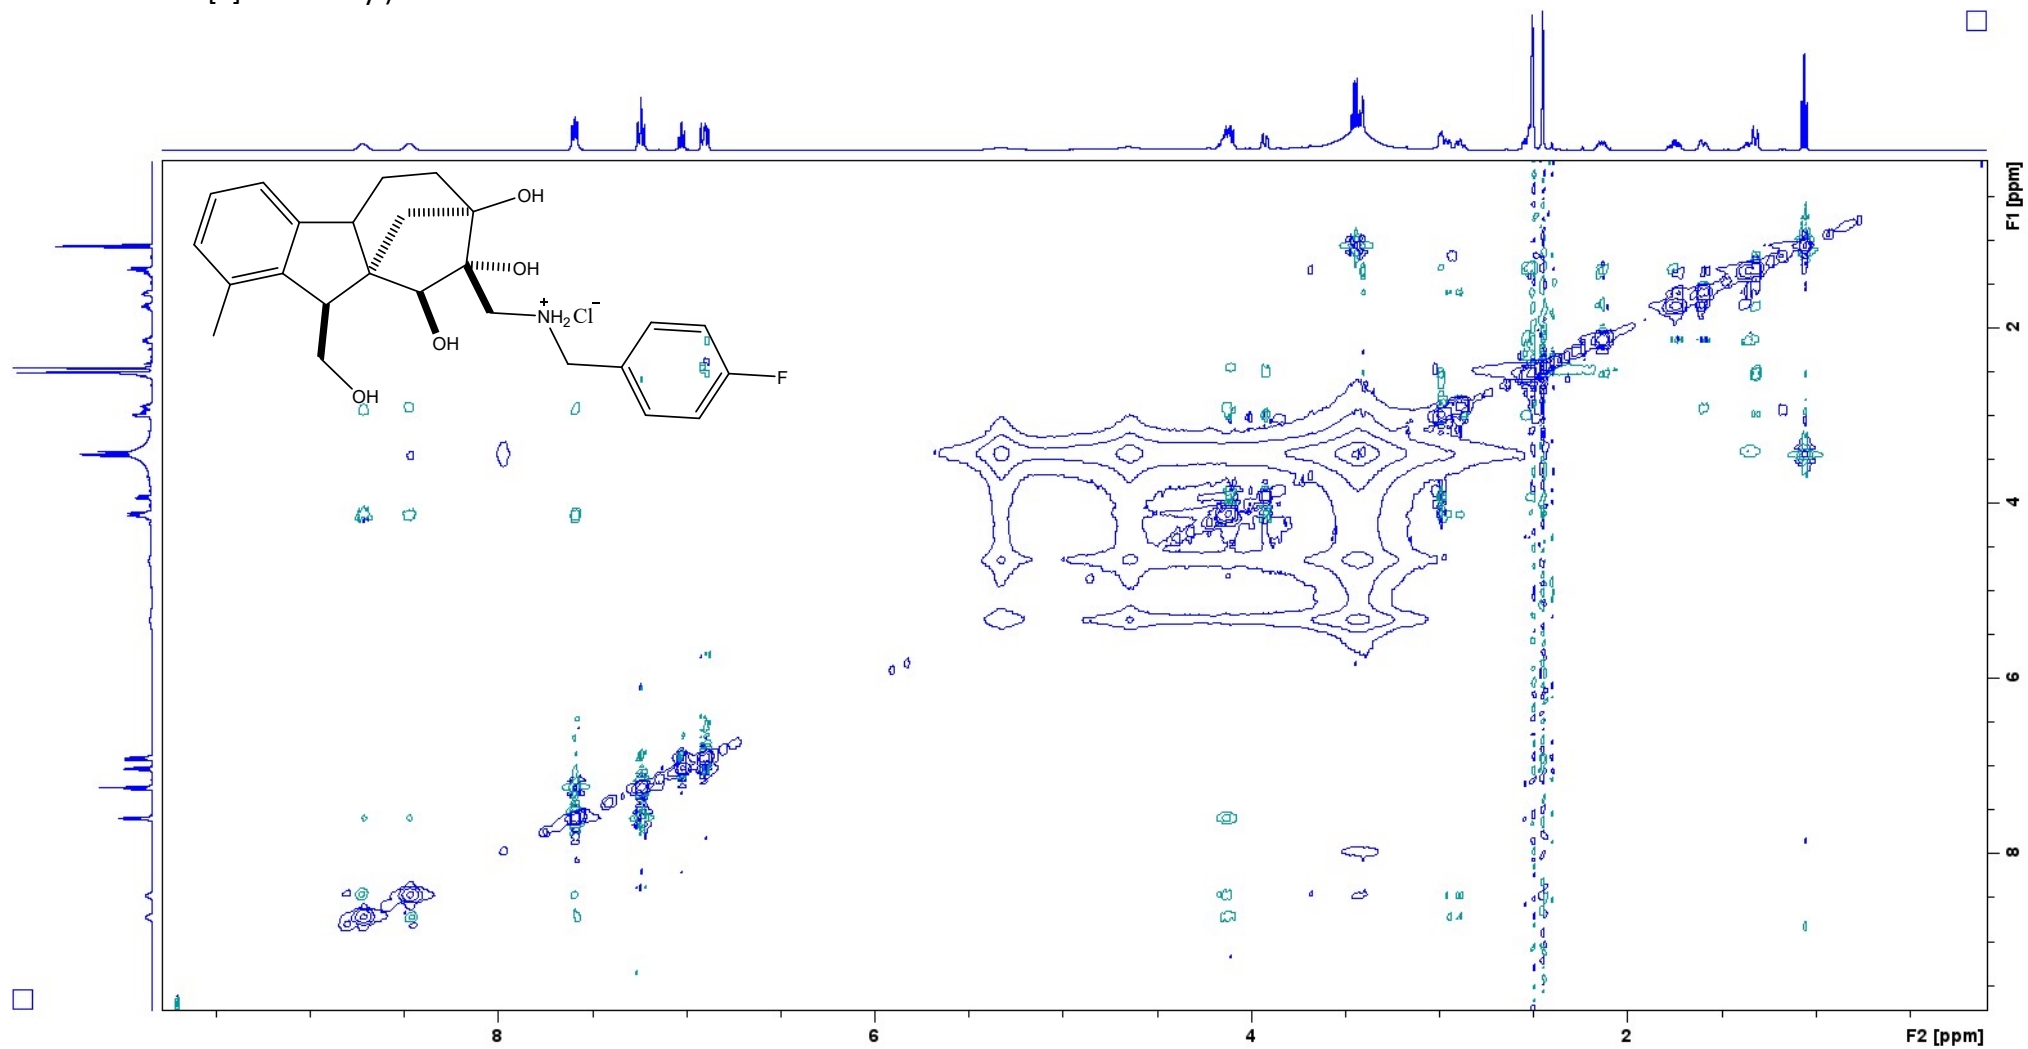

HSQC of *N*-(4-Fluorobenzyl)-1-((7*S*,8*R*,9*S*,9*aR*,10*S*)-7,8,9-trihydroxy-10-(hydroxymethyl)-1-methyl-4*b*,6,7,8,9,10-hexahydro-5*H*-7,9a-methanobenzo[*a*]azulen-8-yl)methanaminium **20**

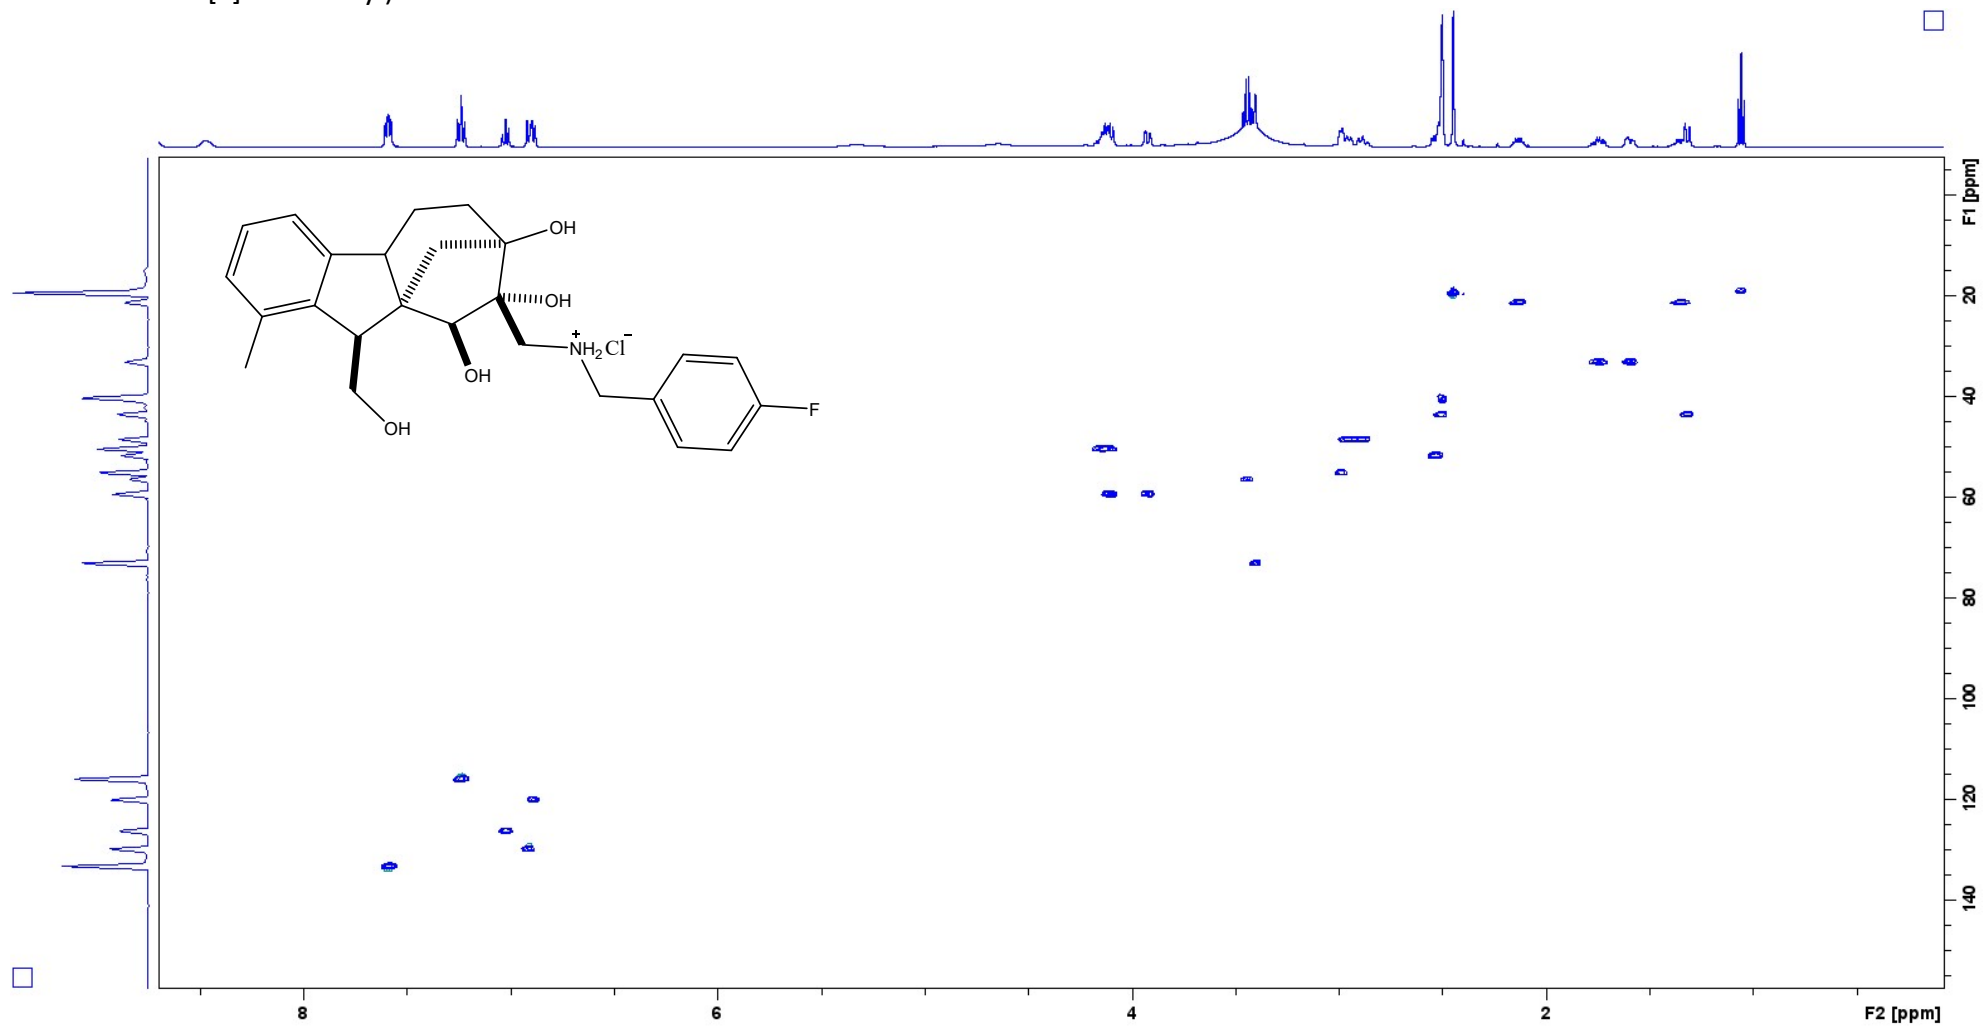

HMBC of *N*-(4-Fluorobenzyl)-1-((7*S*,8*R*,9*S*,9*aR*,10*S*)-7,8,9-trihydroxy-10-(hydroxymethyl)-1-methyl-4*b*,6,7,8,9,10-hexahydro-5*H*-7,9a-methanobenzo[*a*]azulen-8-yl)methanaminium **20**

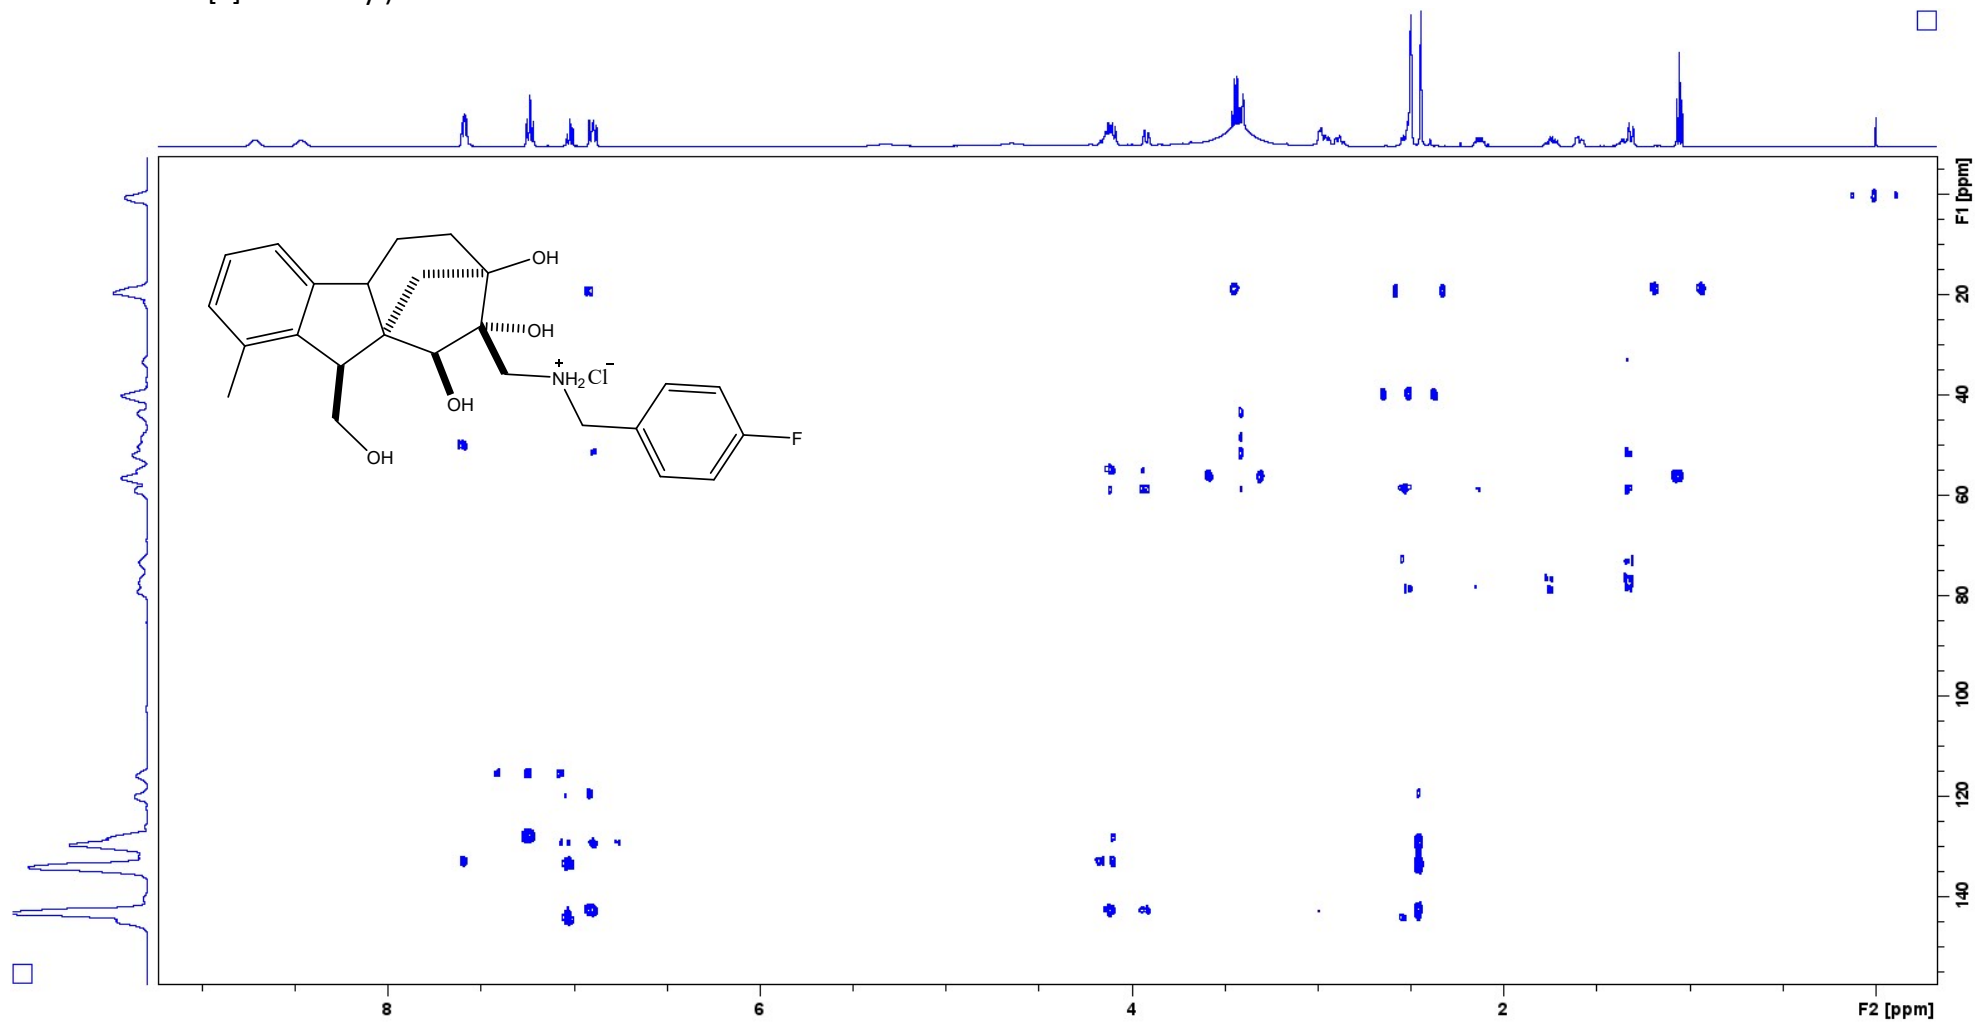

$^{19}\text{F}$  J-MOD NMR (470 MHz) of *N*-(4-Fluorobenzyl)-1-((7*S*,8*R*,9*S*,9*aR*,10*S*)-7,8,9-trihydroxy-10-(hydroxymethyl)-1-methyl-4*b*,6,7,8,9,10-hexahydro-5*H*-7,9*a*-methanobenzo[*a*]azulen-8-yl)methanaminium **20**

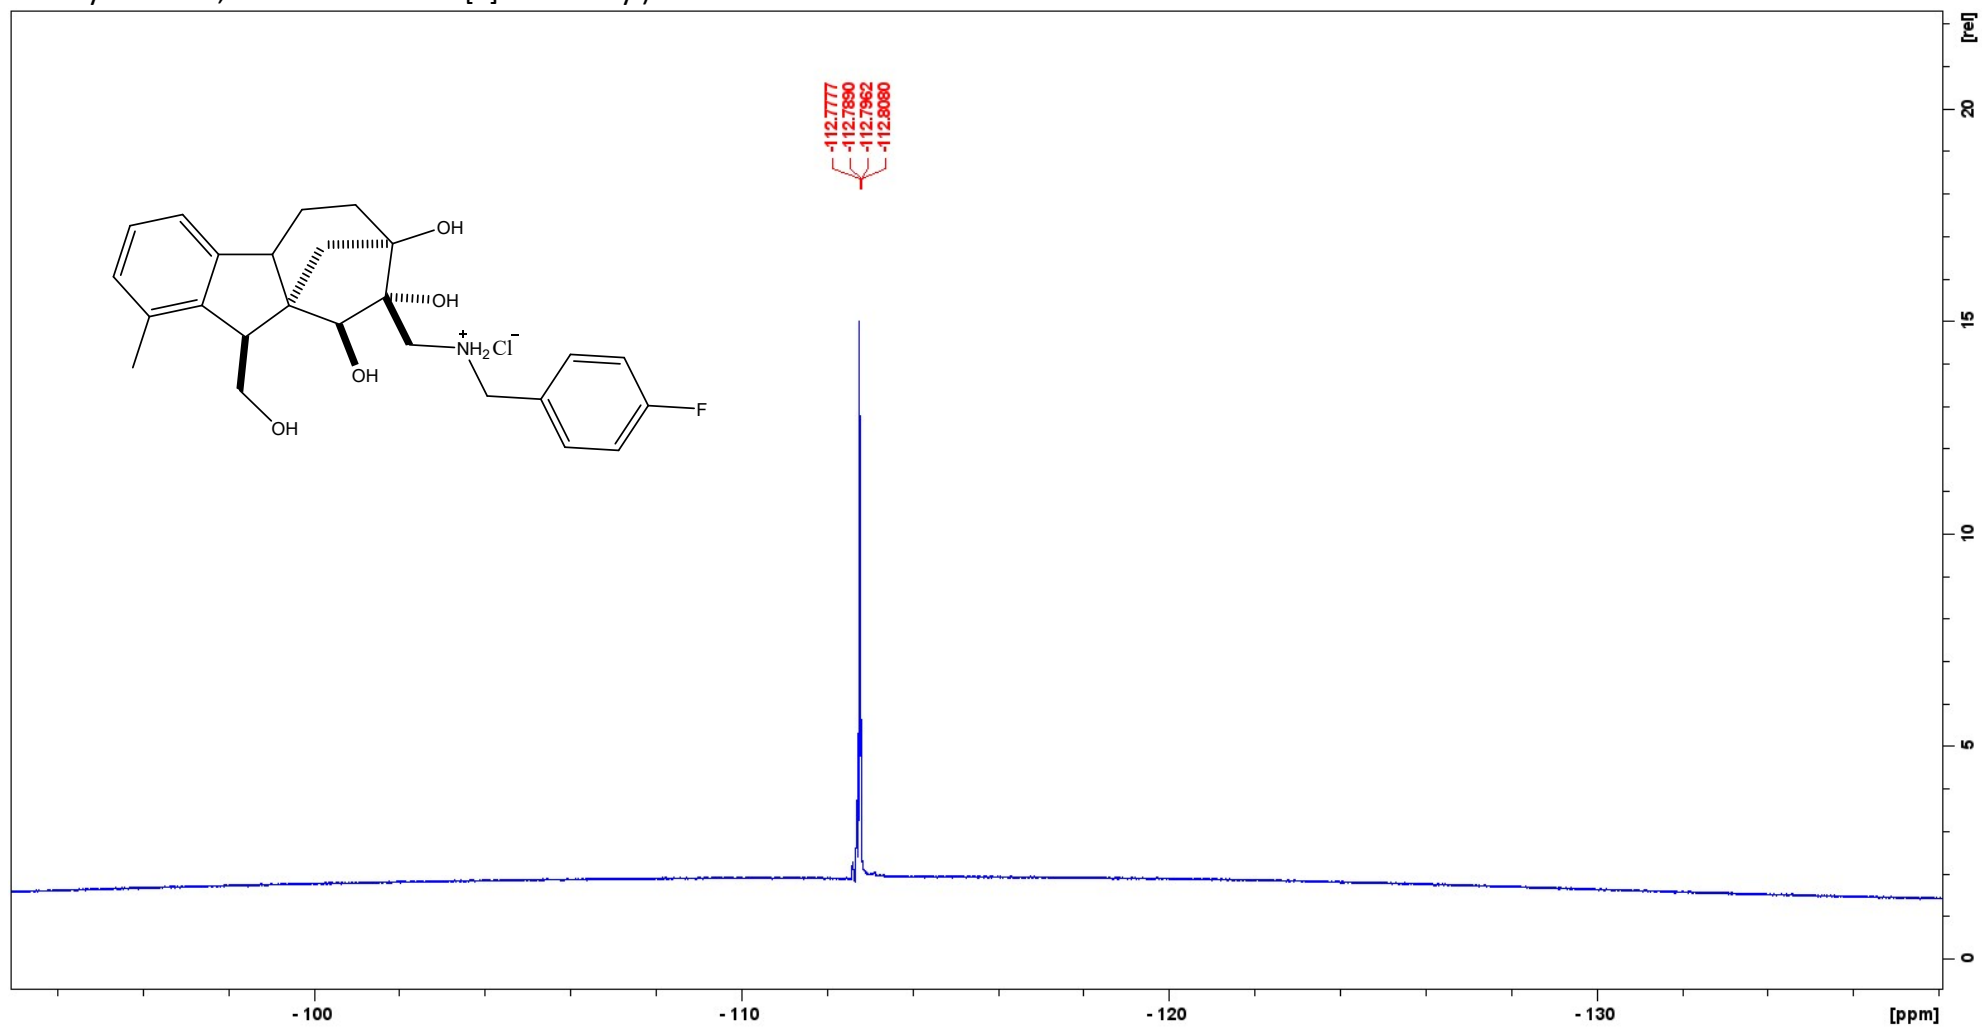



$^1\text{H-NMR}$  (500 MHz) of *N*-(4-Methoxybenzyl)-1-((7*S*,8*R*,9*S*,9*aR*,10*S*)-7,8,9-trihydroxy-10-(hydroxymethyl)-1-methyl-4b,6,7,8,9,10-hexahydro-5*H*-7,9a-methanobenzo[*a*]azulen-8-yl)methanaminium chloride **21**

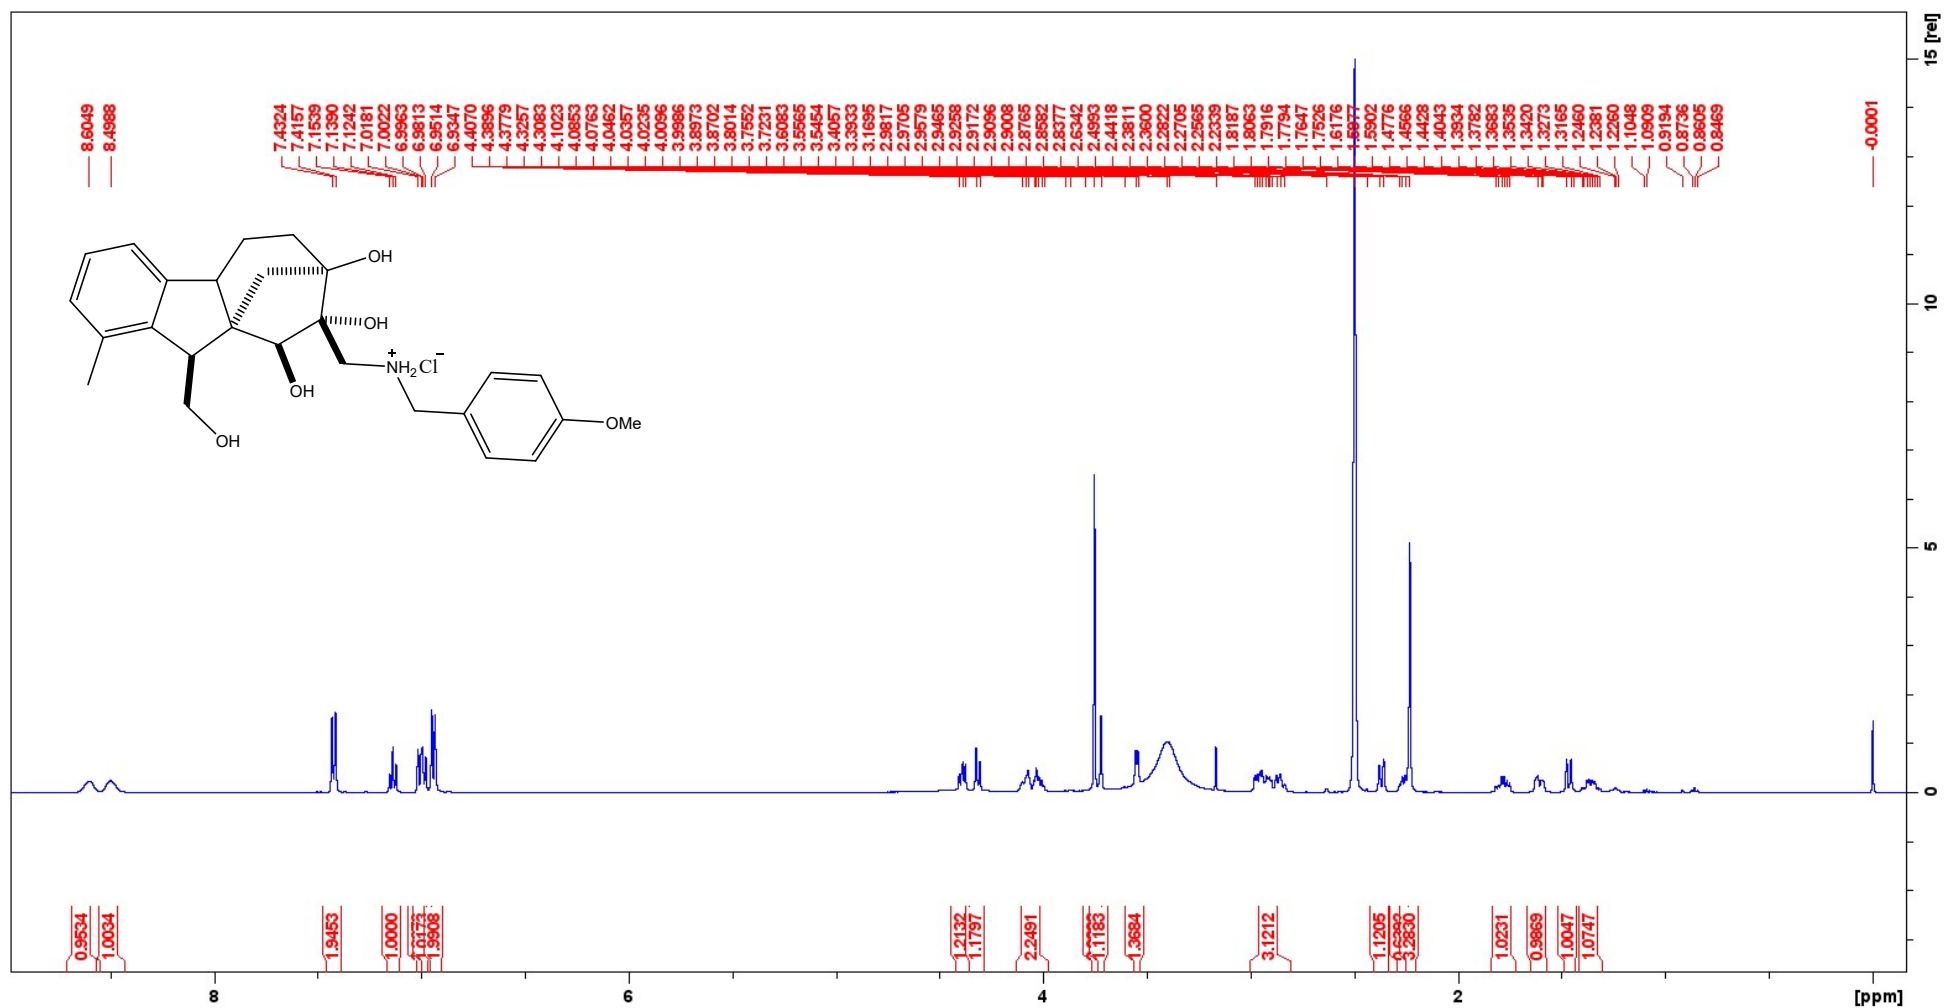

$^{13}\text{C}\{^1\text{H}\}$  J-MOD NMR (125 MHz) of *N*-(4-Methoxybenzyl)-1-((7*S*,8*R*,9*S*,9*aR*,10*S*)-7,8,9-trihydroxy-10-(hydroxymethyl)-1-methyl-4*b*,6,7,8,9,10-hexahydro-5*H*-7,9*a*-methanobenzo[*a*]azulen-8-yl)methanaminium chloride **21**

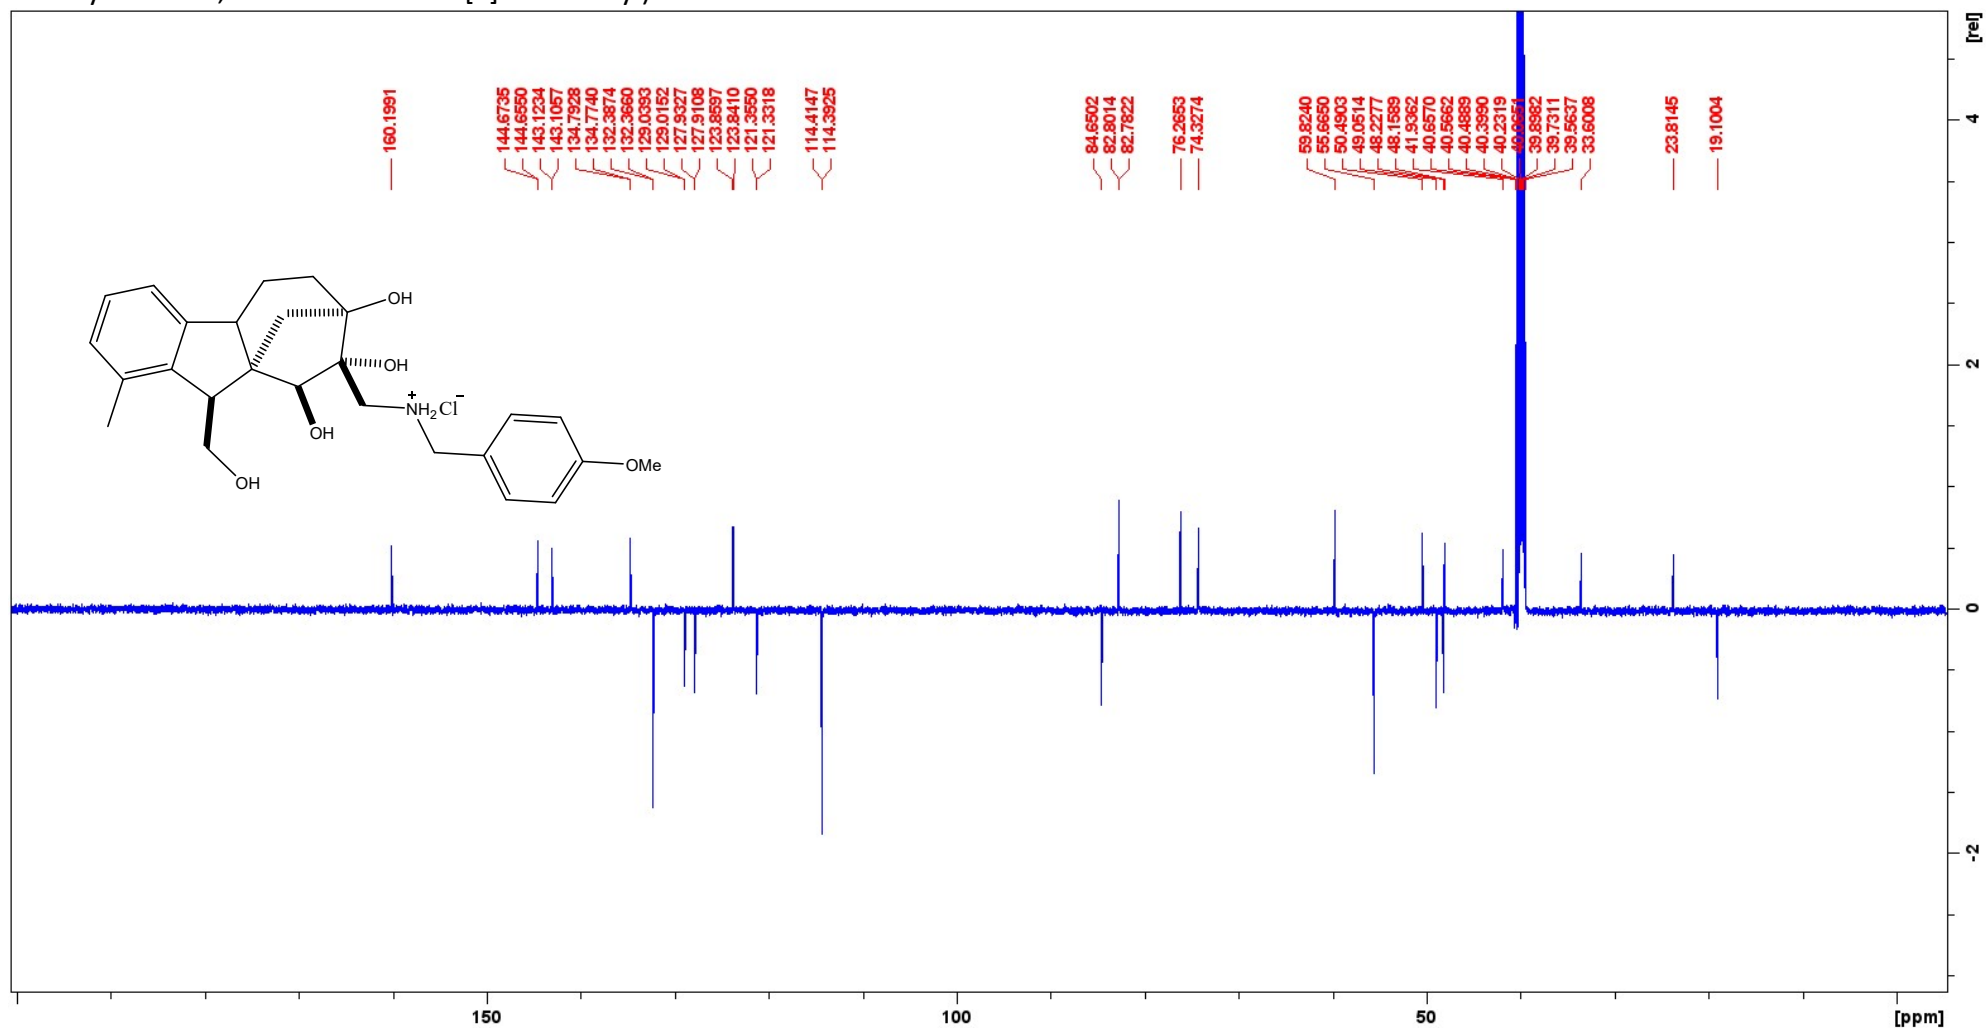

HSQC of *N*-(4-Methoxybenzyl)-1-((7*S*,8*R*,9*S*,9*aR*,10*S*)-7,8,9-trihydroxy-10-(hydroxymethyl)-1-methyl-4*b*,6,7,8,9,10-hexahydro-5*H*-7,9a-methanobenzo[*a*]azulen-8-yl)methanaminium chloride **21**

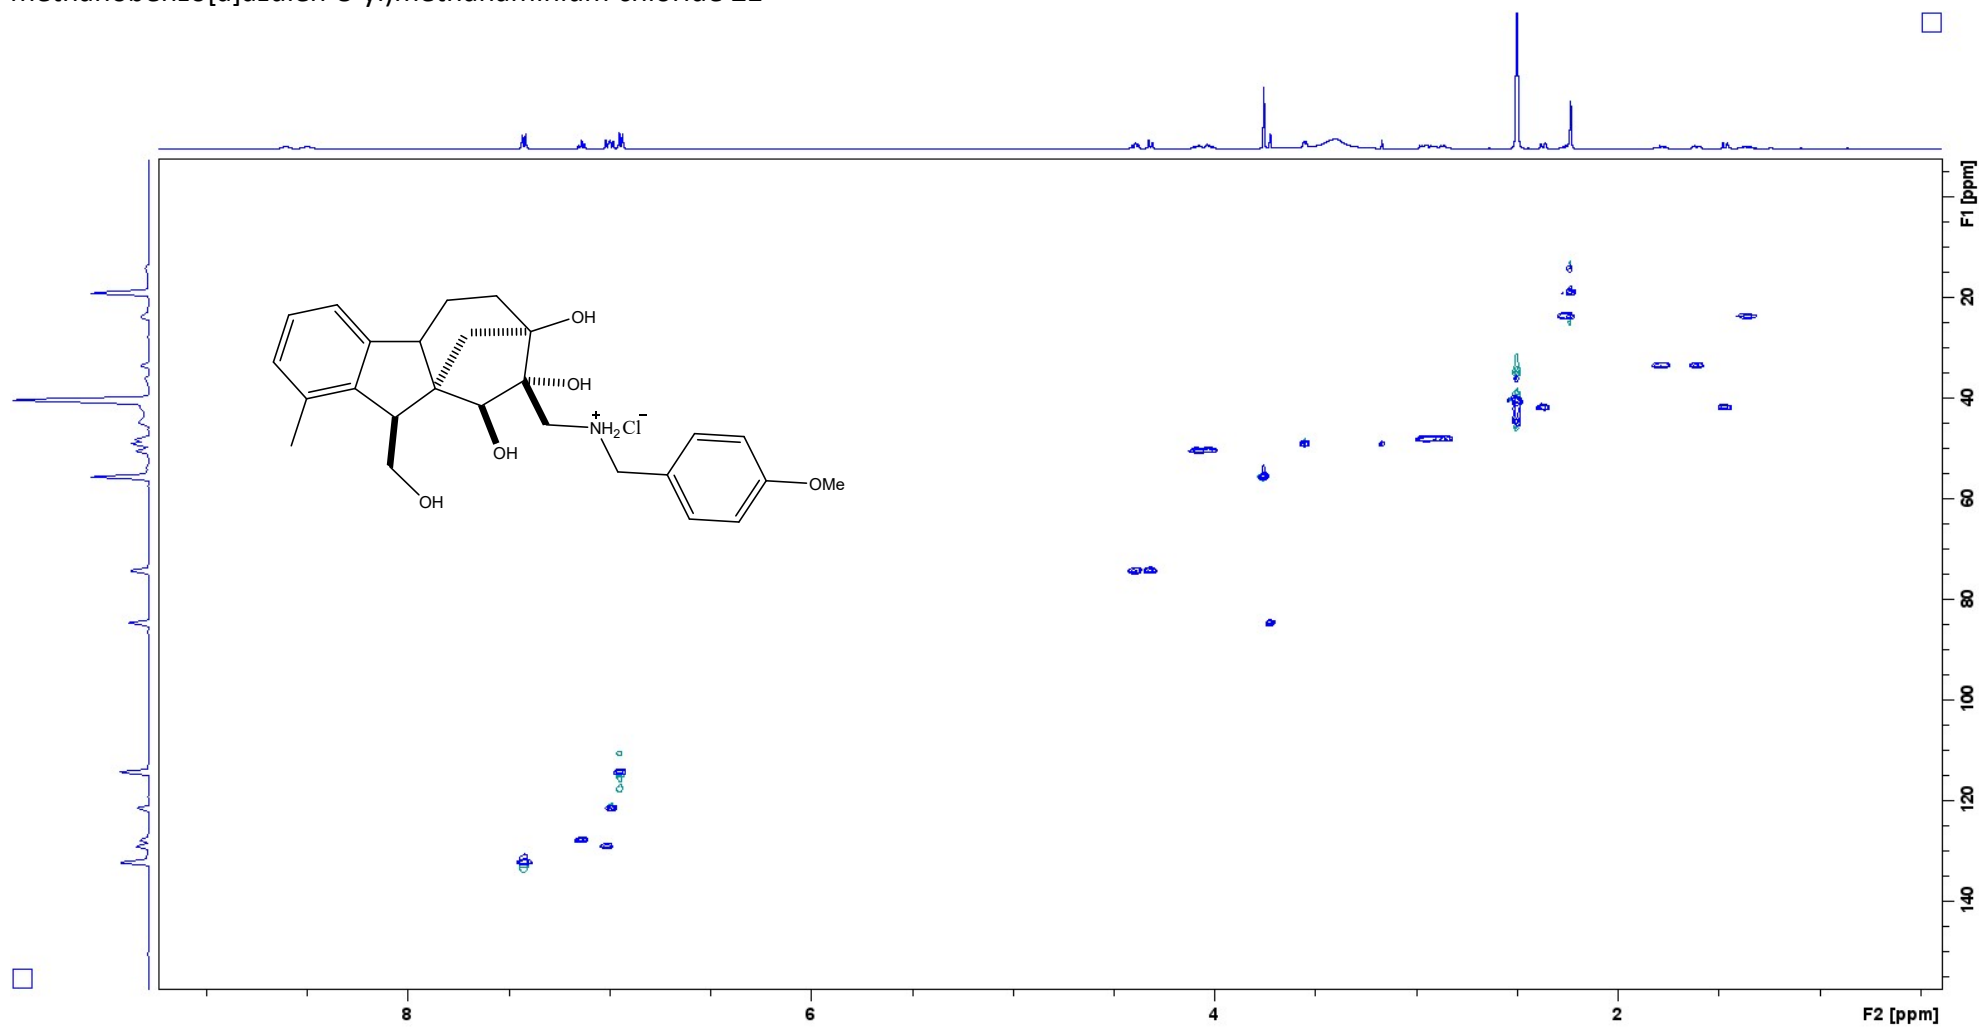

HMBC of *N*-(4-Methoxybenzyl)-1-((7*S*,8*R*,9*S*,9*aR*,10*S*)-7,8,9-trihydroxy-10-(hydroxymethyl)-1-methyl-4*b*,6,7,8,9,10-hexahydro-5*H*-7,9a-methanobenzo[*a*]azulen-8-yl)methanaminium chloride **21**

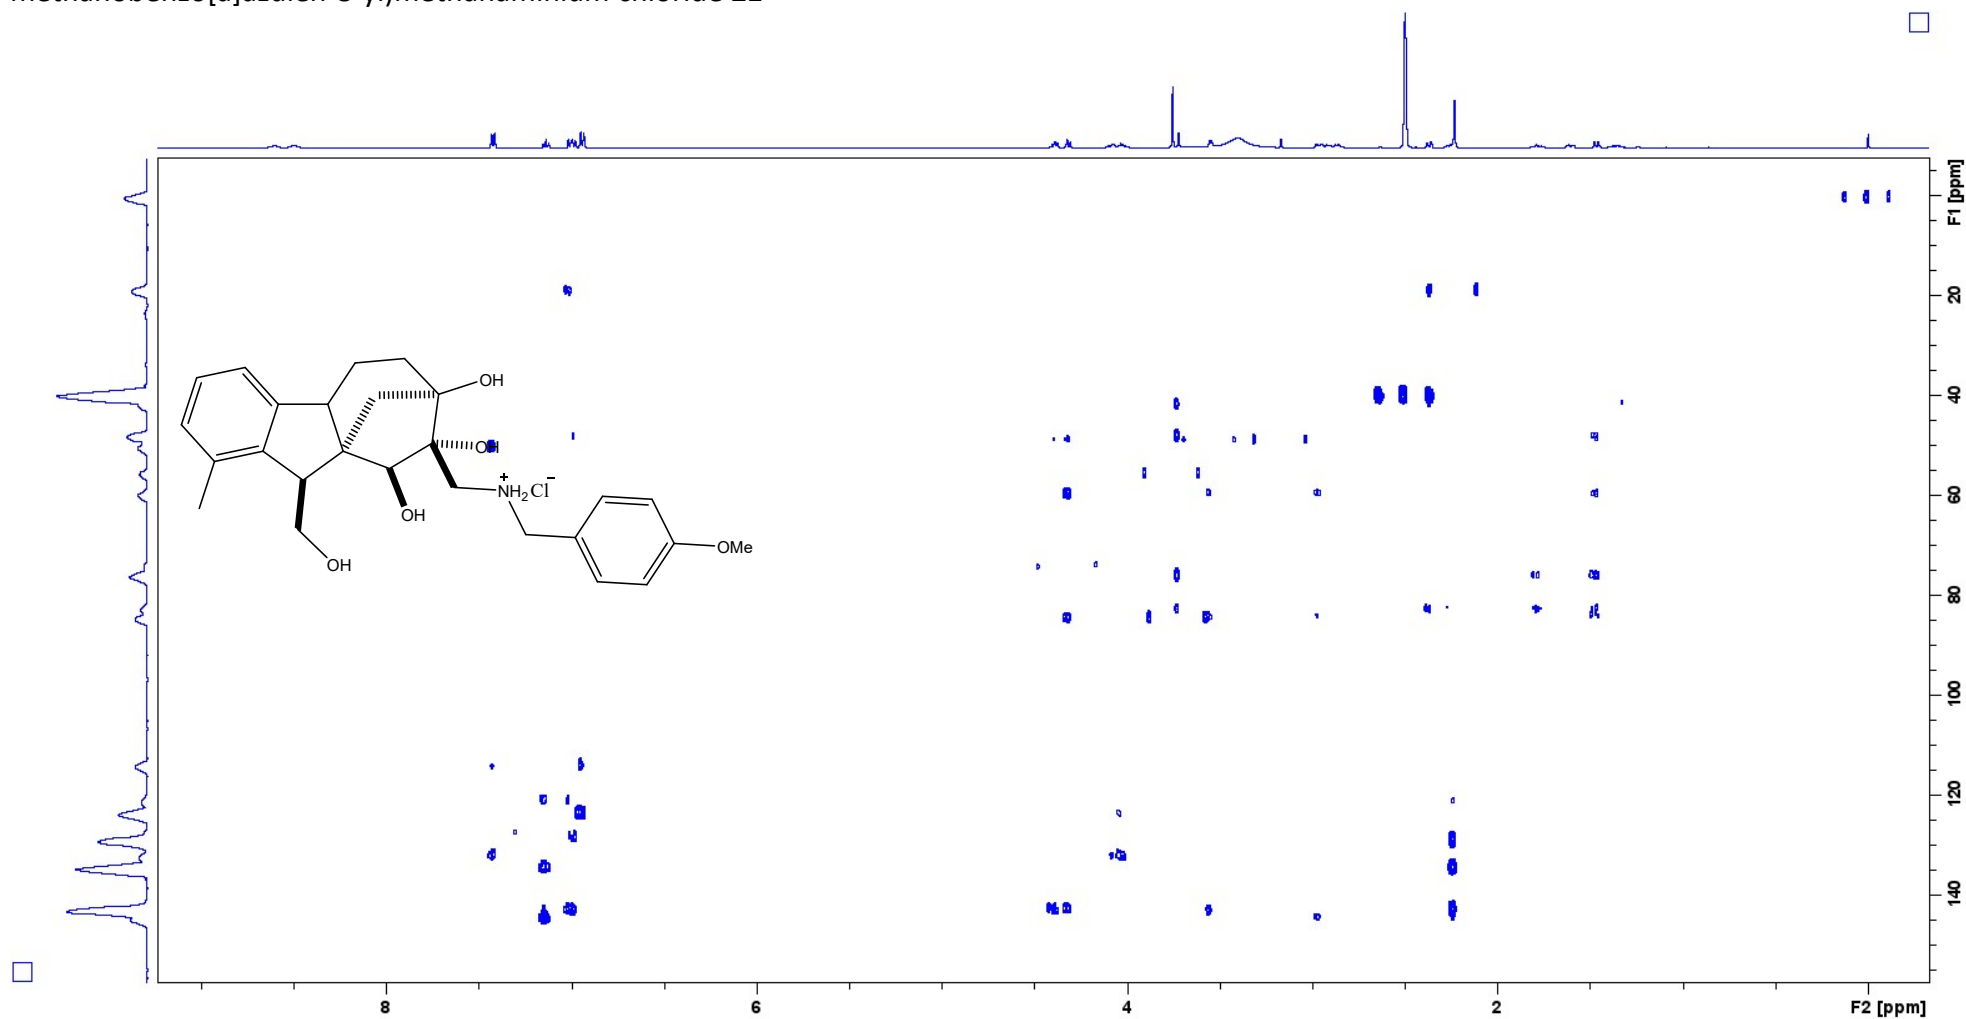

<sup>1</sup>H-NMR (500 MHz) of 1-(Naphthalen-1-yl)-N-(((7S,8R,9S,9aR,10S)-7,8,9-trihydroxy-10-(hydroxymethyl)-1-methyl-4b,6,7,8,9,10-hexahydro-5H-7,9a-methanobenzo[a]azulen-8-yl)methyl)methanaminium chloride **22**

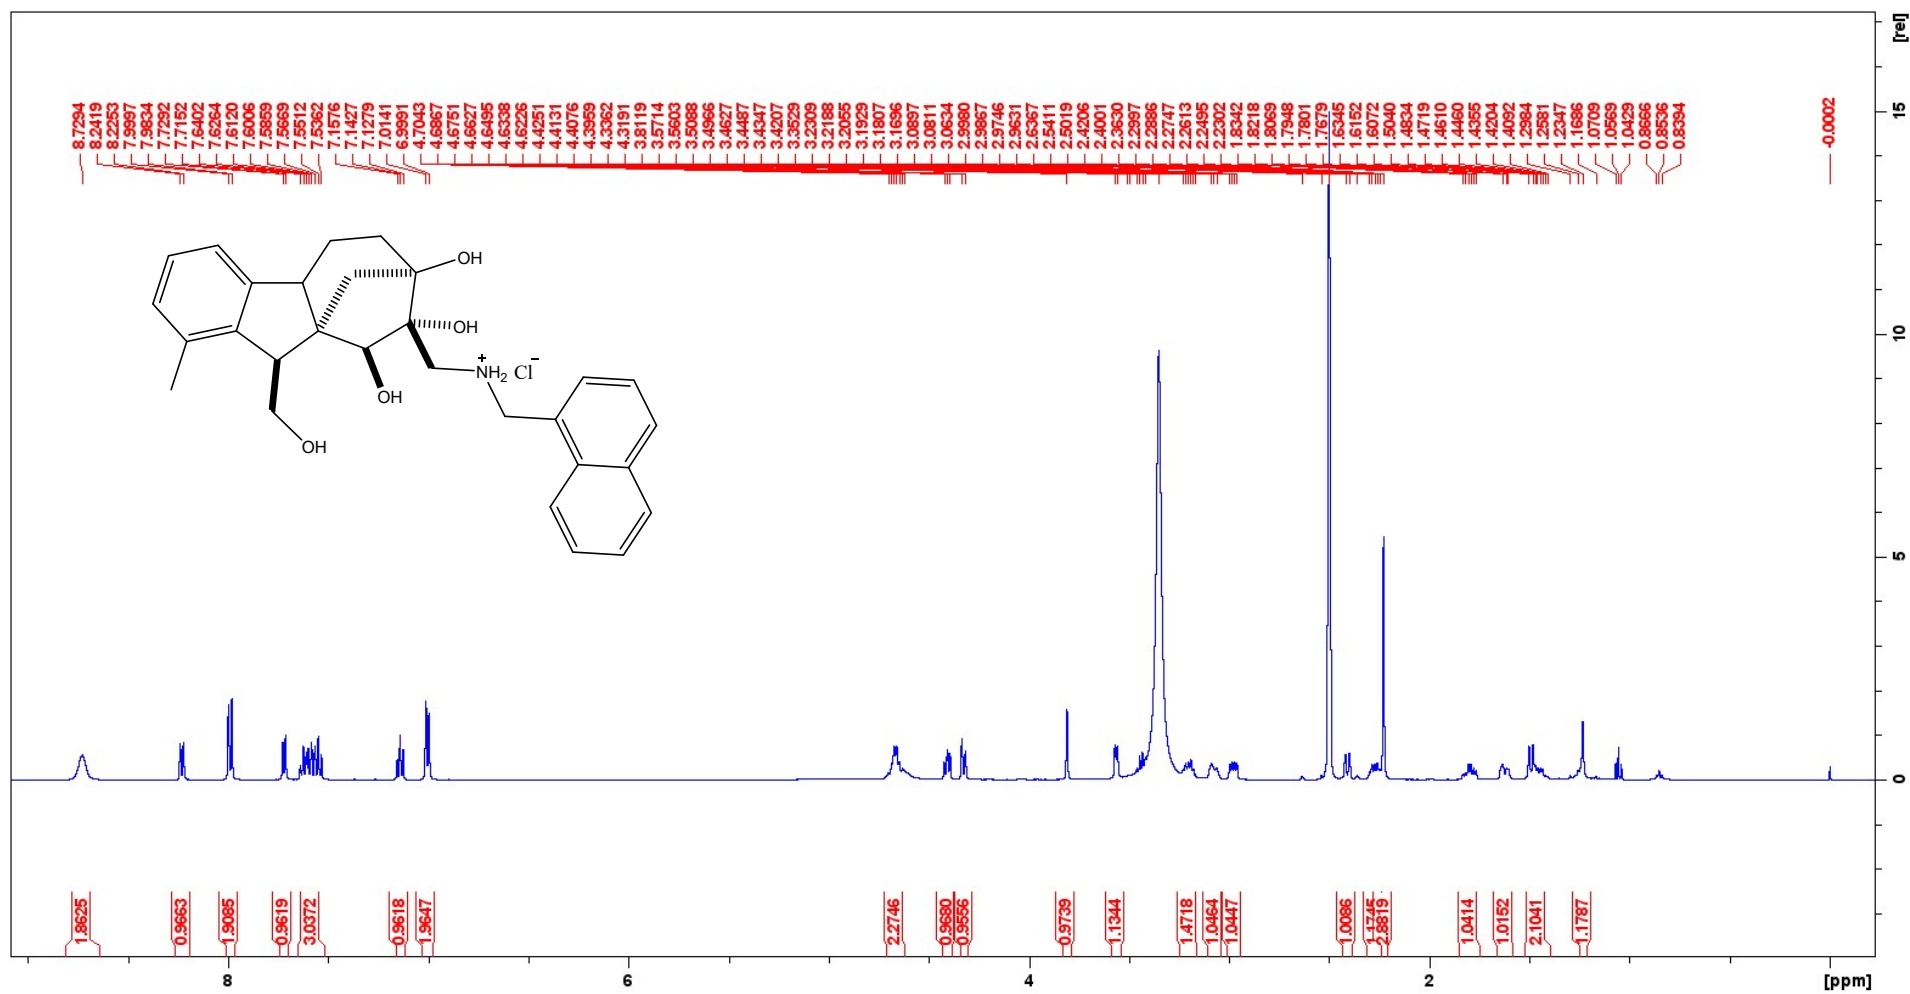

$^{13}\text{C}\{^1\text{H}\}$  J-MOD NMR (125 MHz) of 1-(Naphthalen-1-yl)-N-(((7S,8R,9S,9aR,10S)-7,8,9-trihydroxy-10-(hydroxymethyl)-1-methyl-4b,6,7,8,9,10-hexahydro-5H-7,9a-methanobenzo[a]azulen-8-yl)methyl)methanaminium chloride **22**

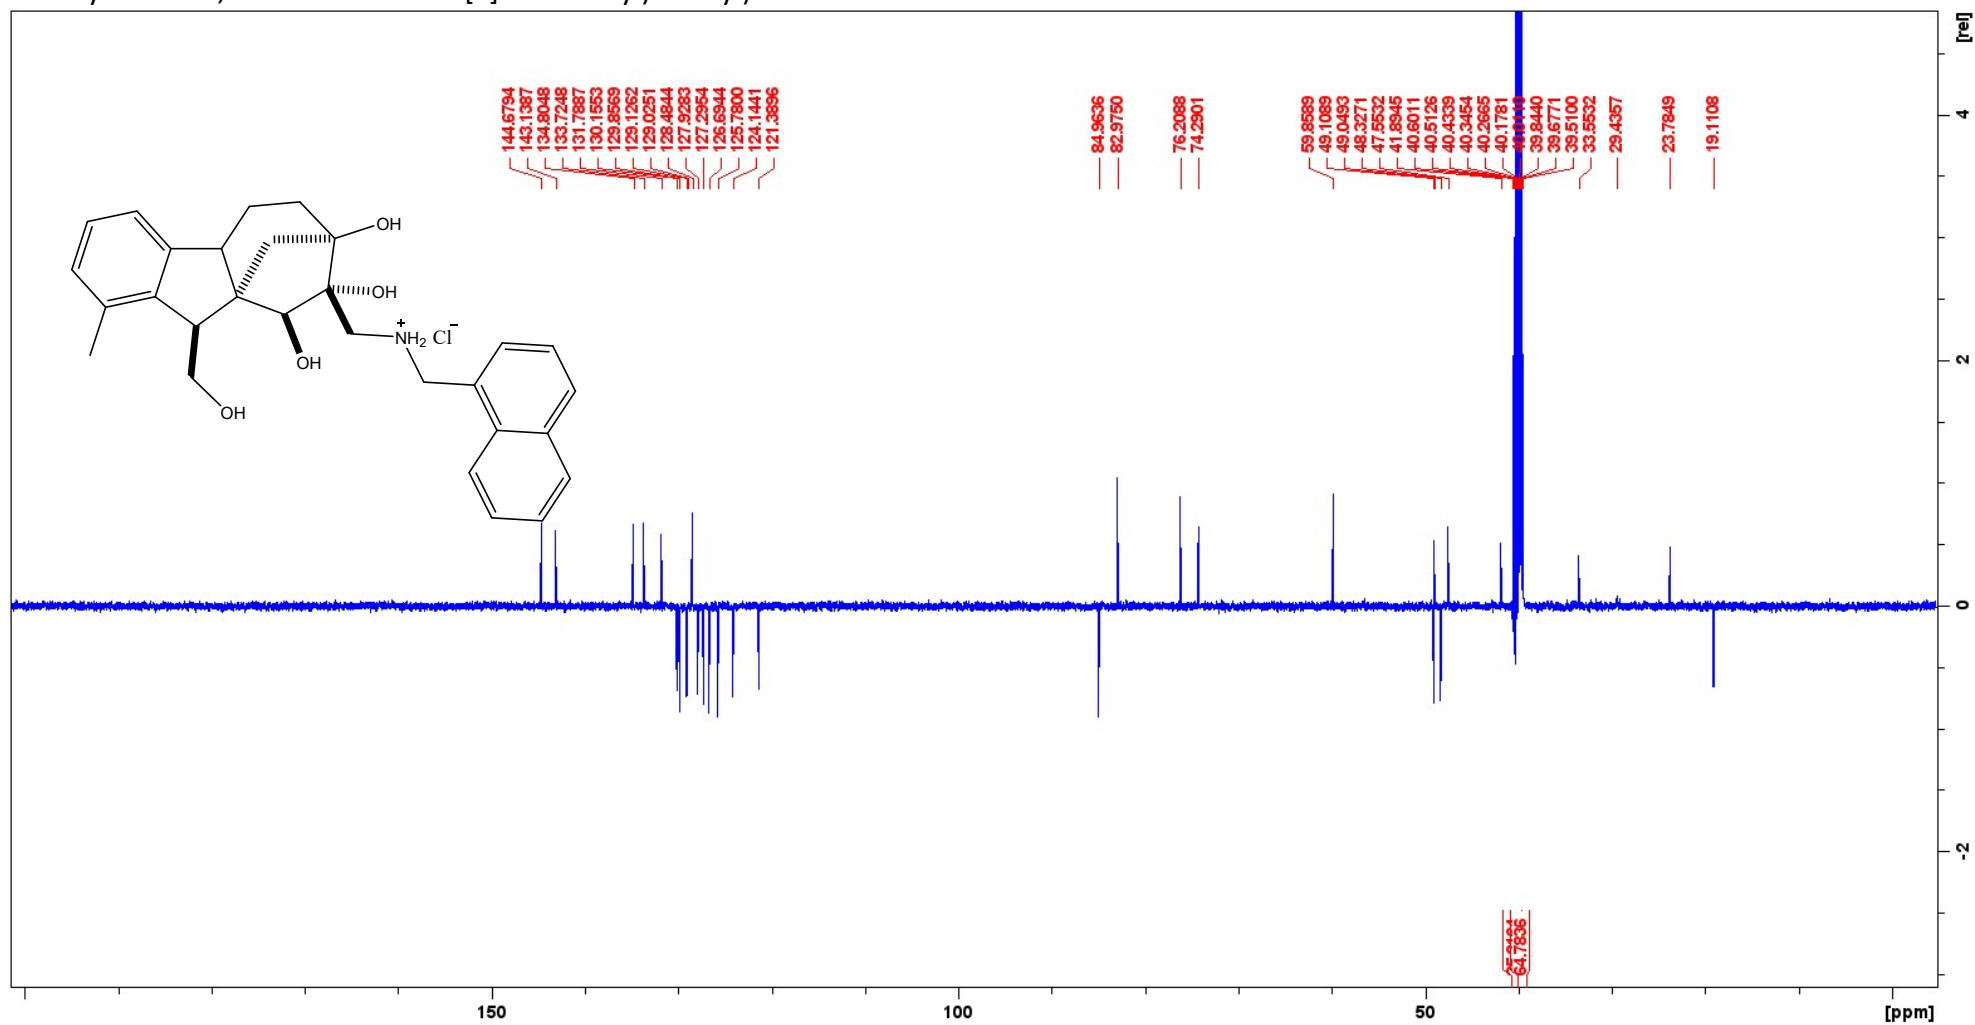

COSY of 1-(Naphthalen-1-yl)-N-(((7S,8R,9S,9aR,10S)-7,8,9-trihydroxy-10-(hydroxymethyl)-1-methyl-4b,6,7,8,9,10-hexahydro-5H-7,9a-methanobenzo[a]azulen-8-yl)methyl)methanaminium chloride **22**

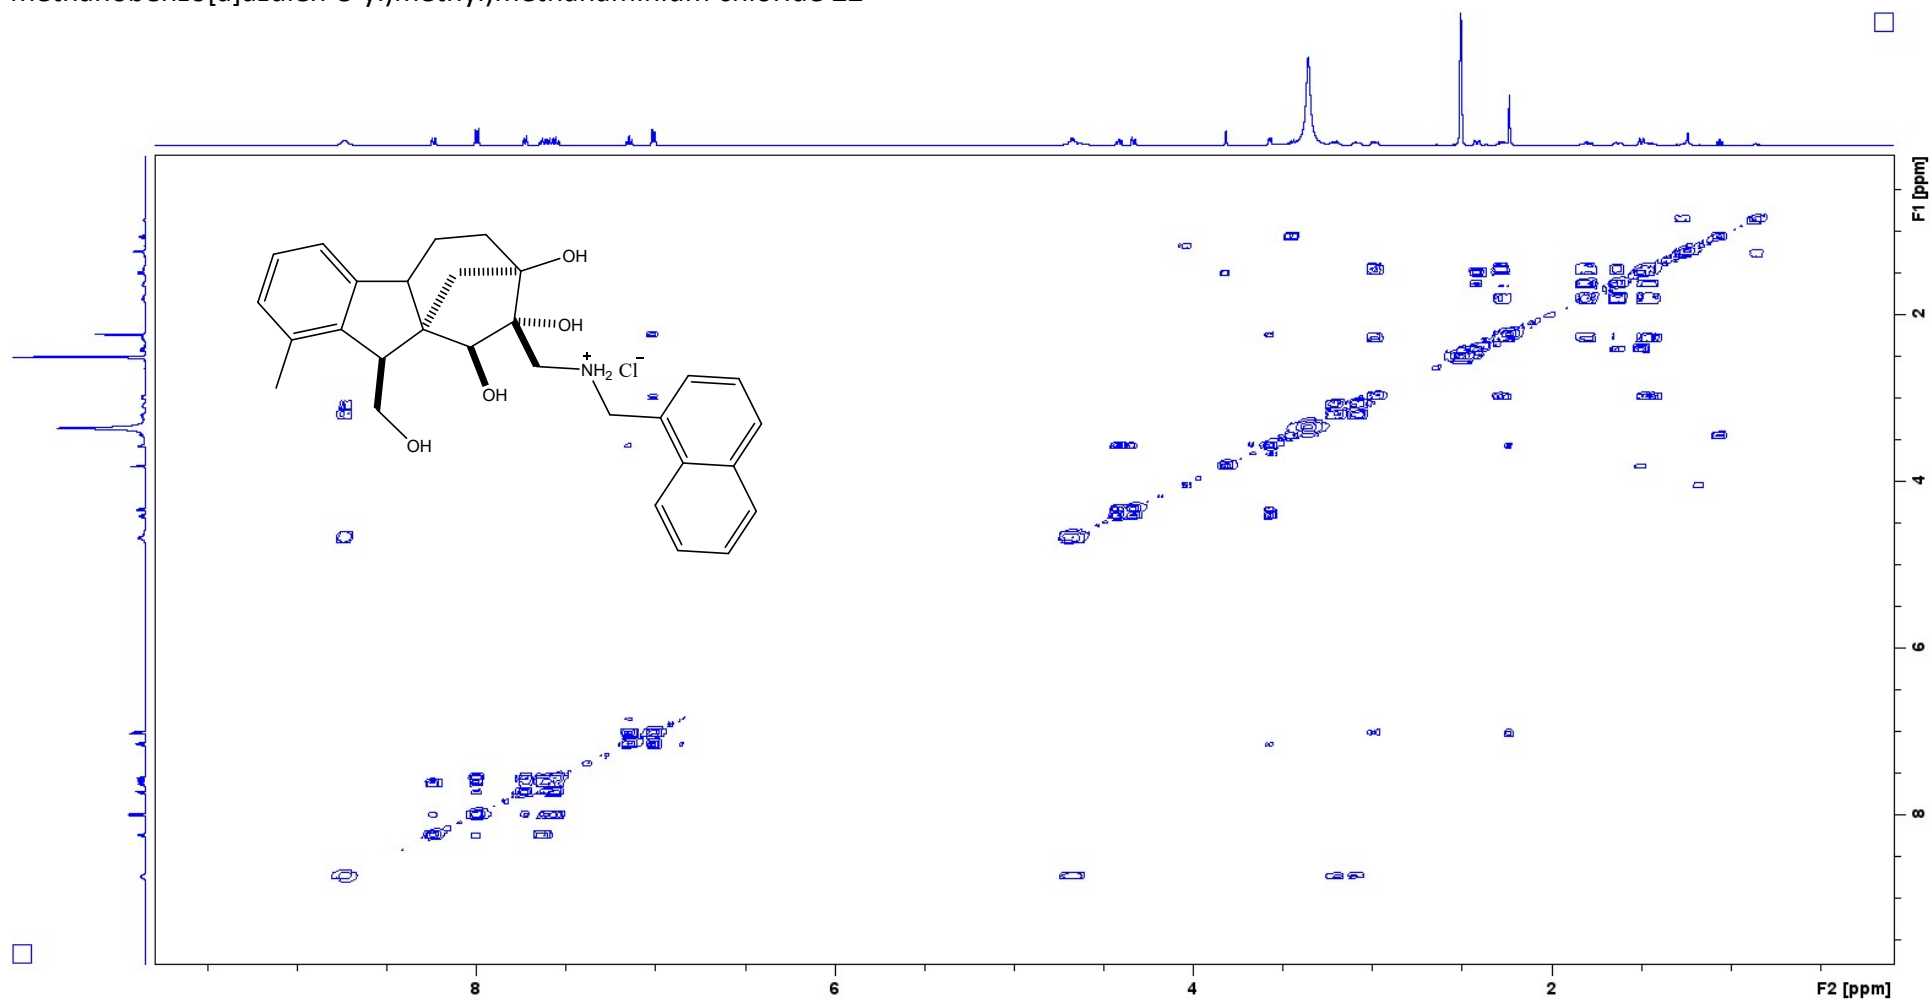

NOESY of 1-(Naphthalen-1-yl)-N-(((7S,8R,9S,9aR,10S)-7,8,9-trihydroxy-10-(hydroxymethyl)-1-methyl-4b,6,7,8,9,10-hexahydro-5H-7,9a-methanobenzo[a]azulen-8-yl)methyl)methanaminium chloride **22**

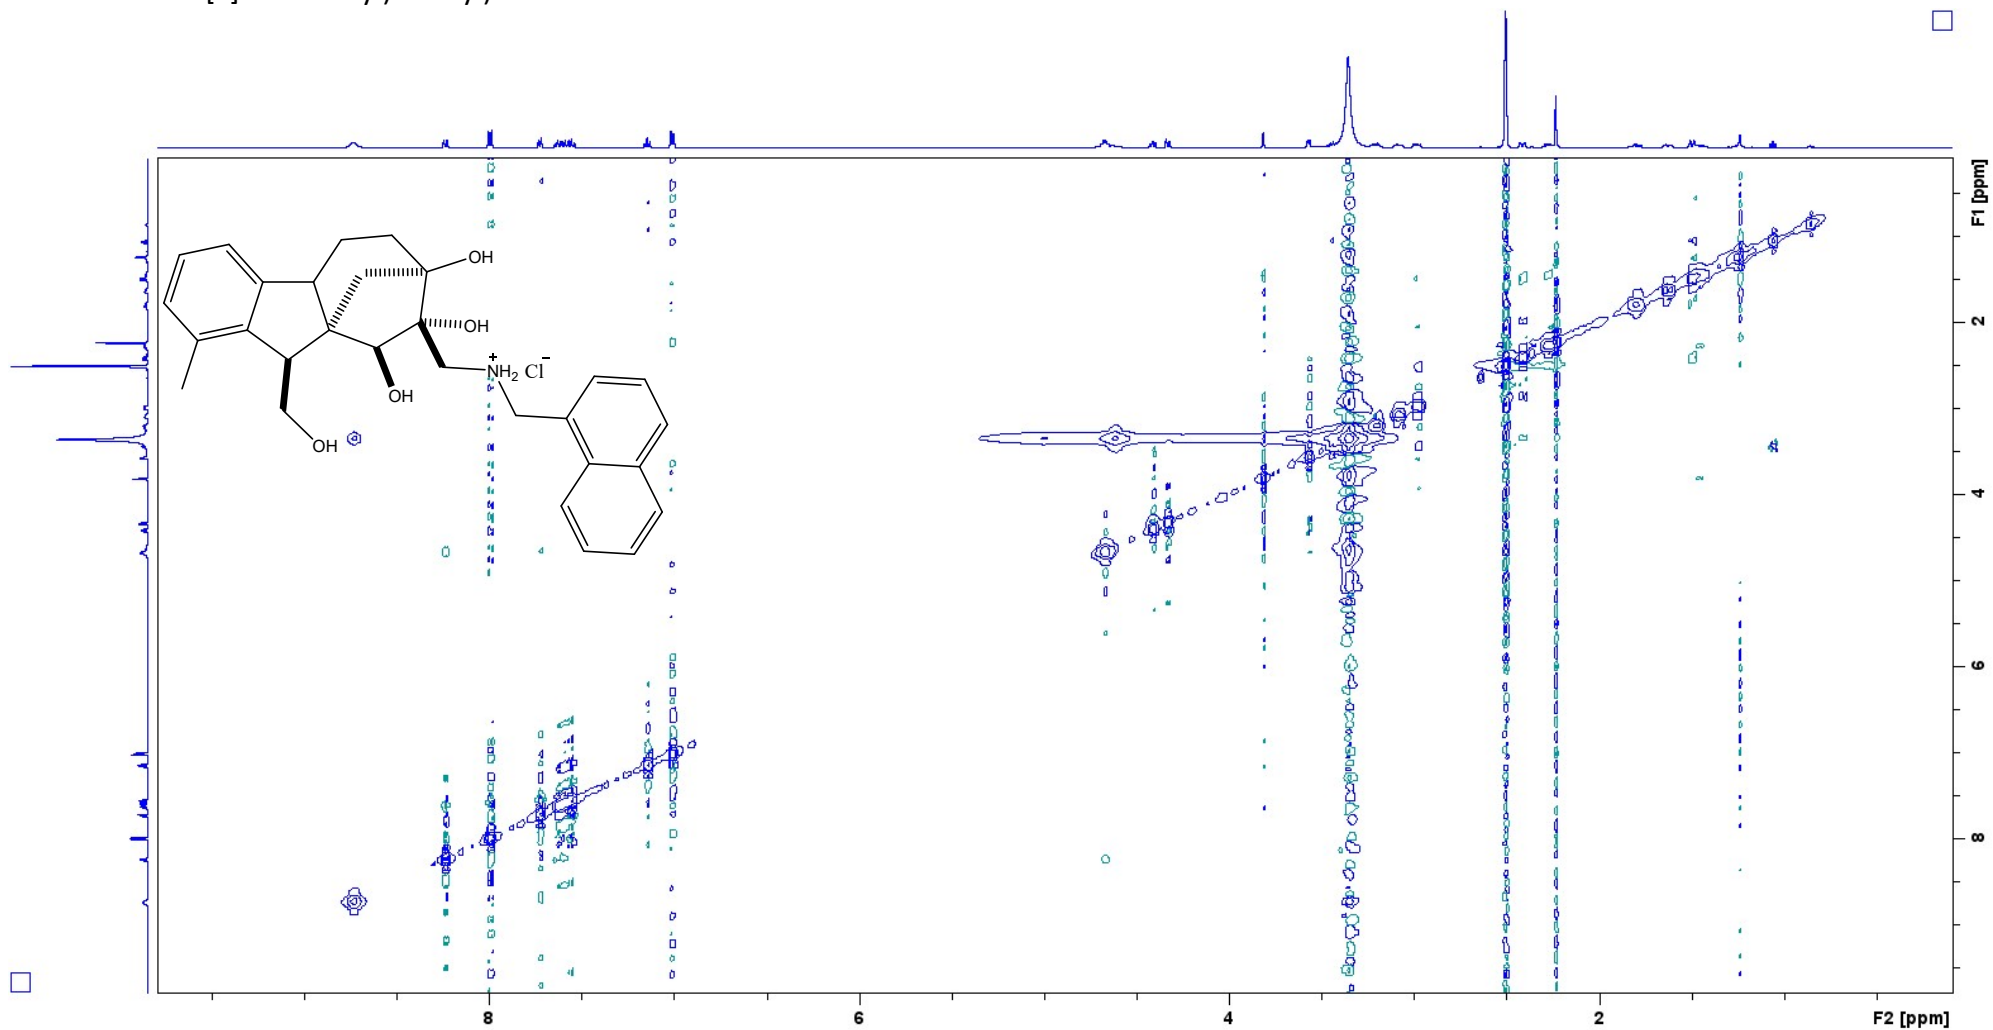



HMBC of 1-(Naphthalen-1-yl)-N-(((7S,8R,9S,9aR,10S)-7,8,9-trihydroxy-10-(hydroxymethyl)-1-methyl-4b,6,7,8,9,10-hexahydro-5H-7,9a-methanobenzo[a]azulen-8-yl)methyl)methanaminium chloride **22**

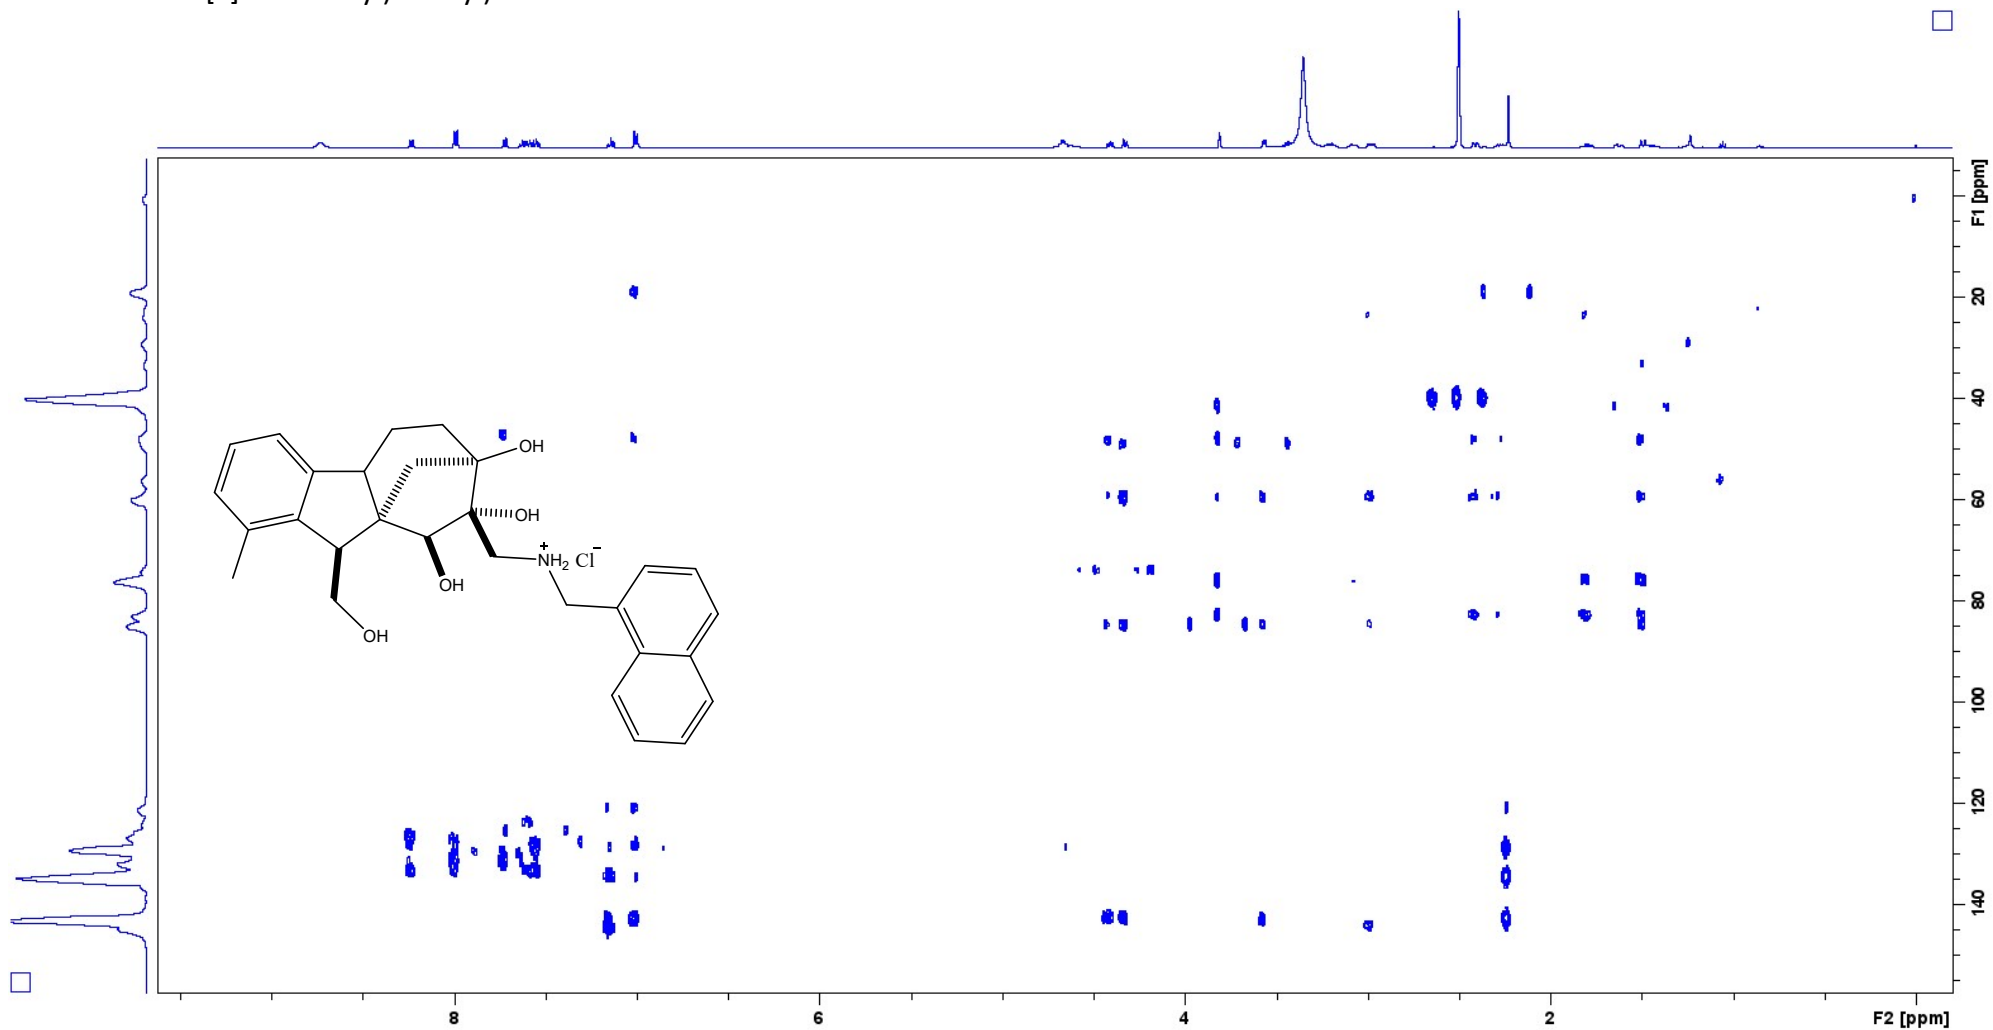

$^1\text{H-NMR}$  (500 MHz) of (1*S*)-1-(Naphthalen-2-yl)-*N*-(((7*S*,8*R*,9*S*,9*aR*,10*S*)-7,8,9-trihydroxy-10-(hydroxymethyl)-1-methyl-4b,6,7,8,9,10-hexahydro-5*H*-7,9a-methanobenzo[*a*]azulen-8-yl)methyl)ethan-1-aminium chloride **23**

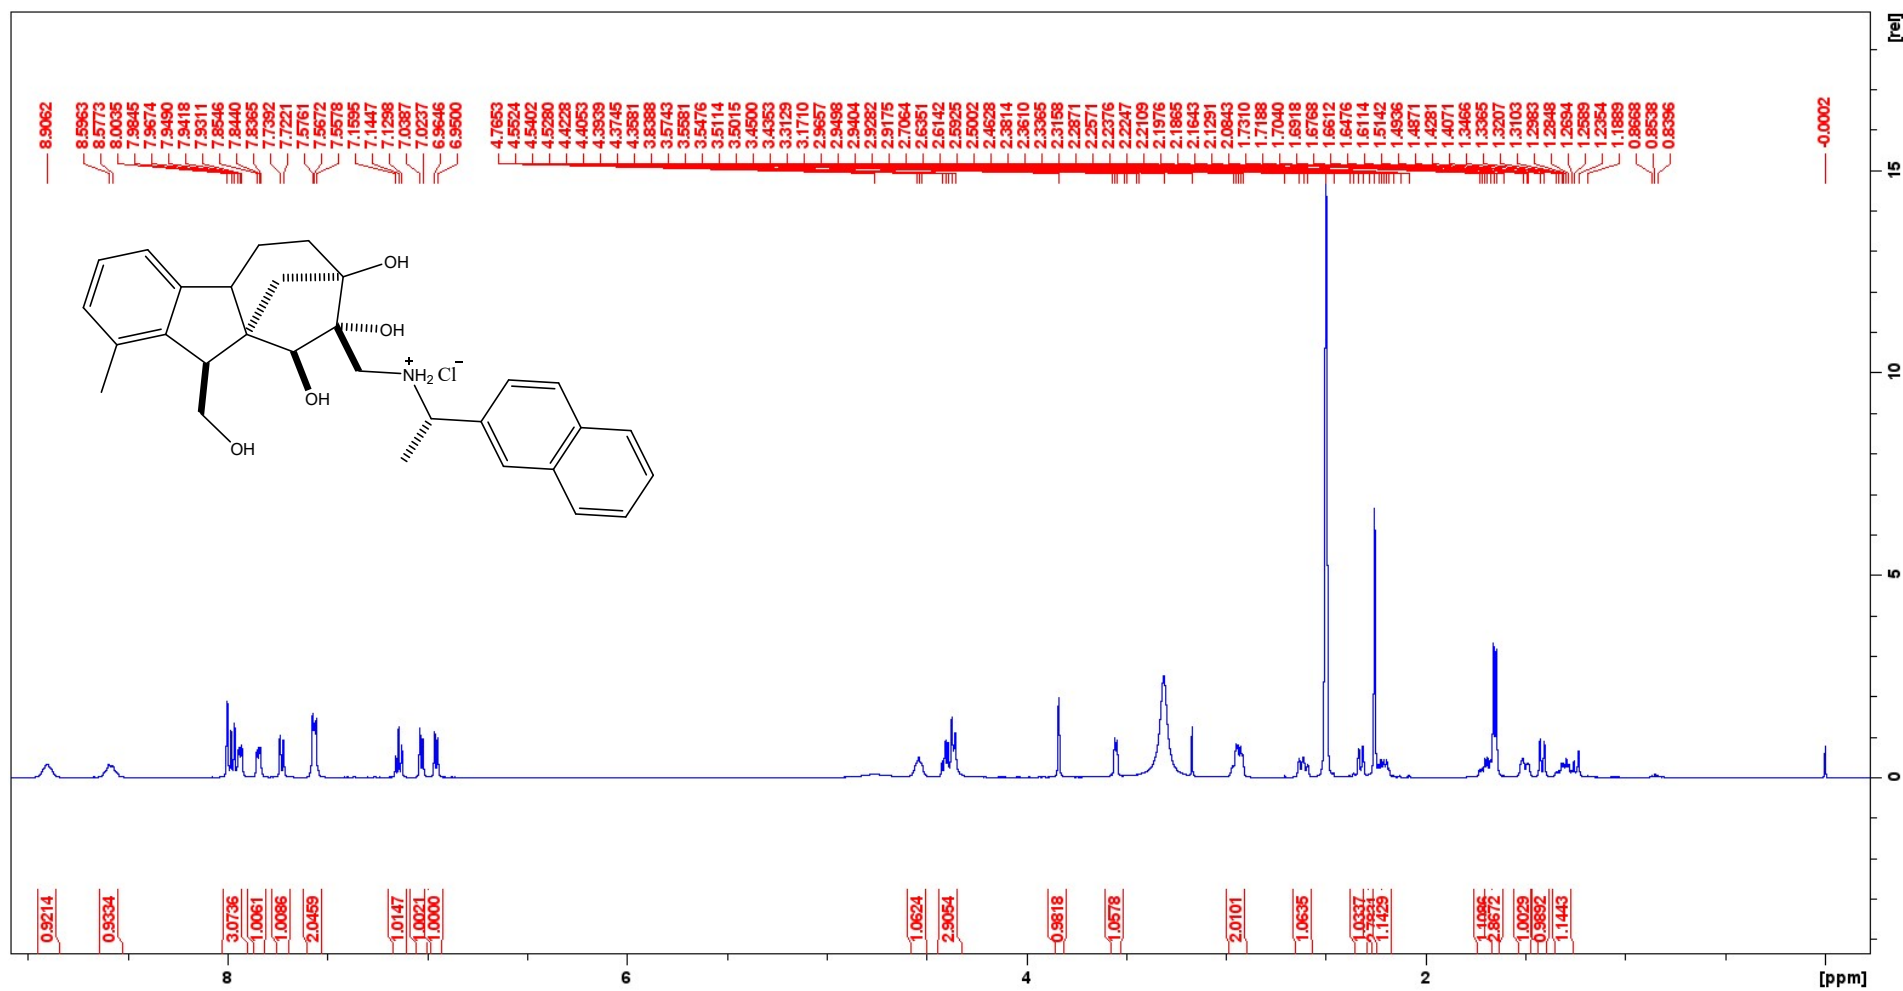

$^{13}\text{C}\{^1\text{H}\}$  J-MOD NMR (125 MHz) of (1S)-1-(Naphthalen-2-yl)-N-(((7S,8R,9S,9aR,10S)-7,8,9-trihydroxy-10-(hydroxymethyl)-1-methyl-4b,6,7,8,9,10-hexahydro-5H-7,9a-methanobenzo[a]azulen-8-yl)methyl)ethan-1-aminium chloride **23**

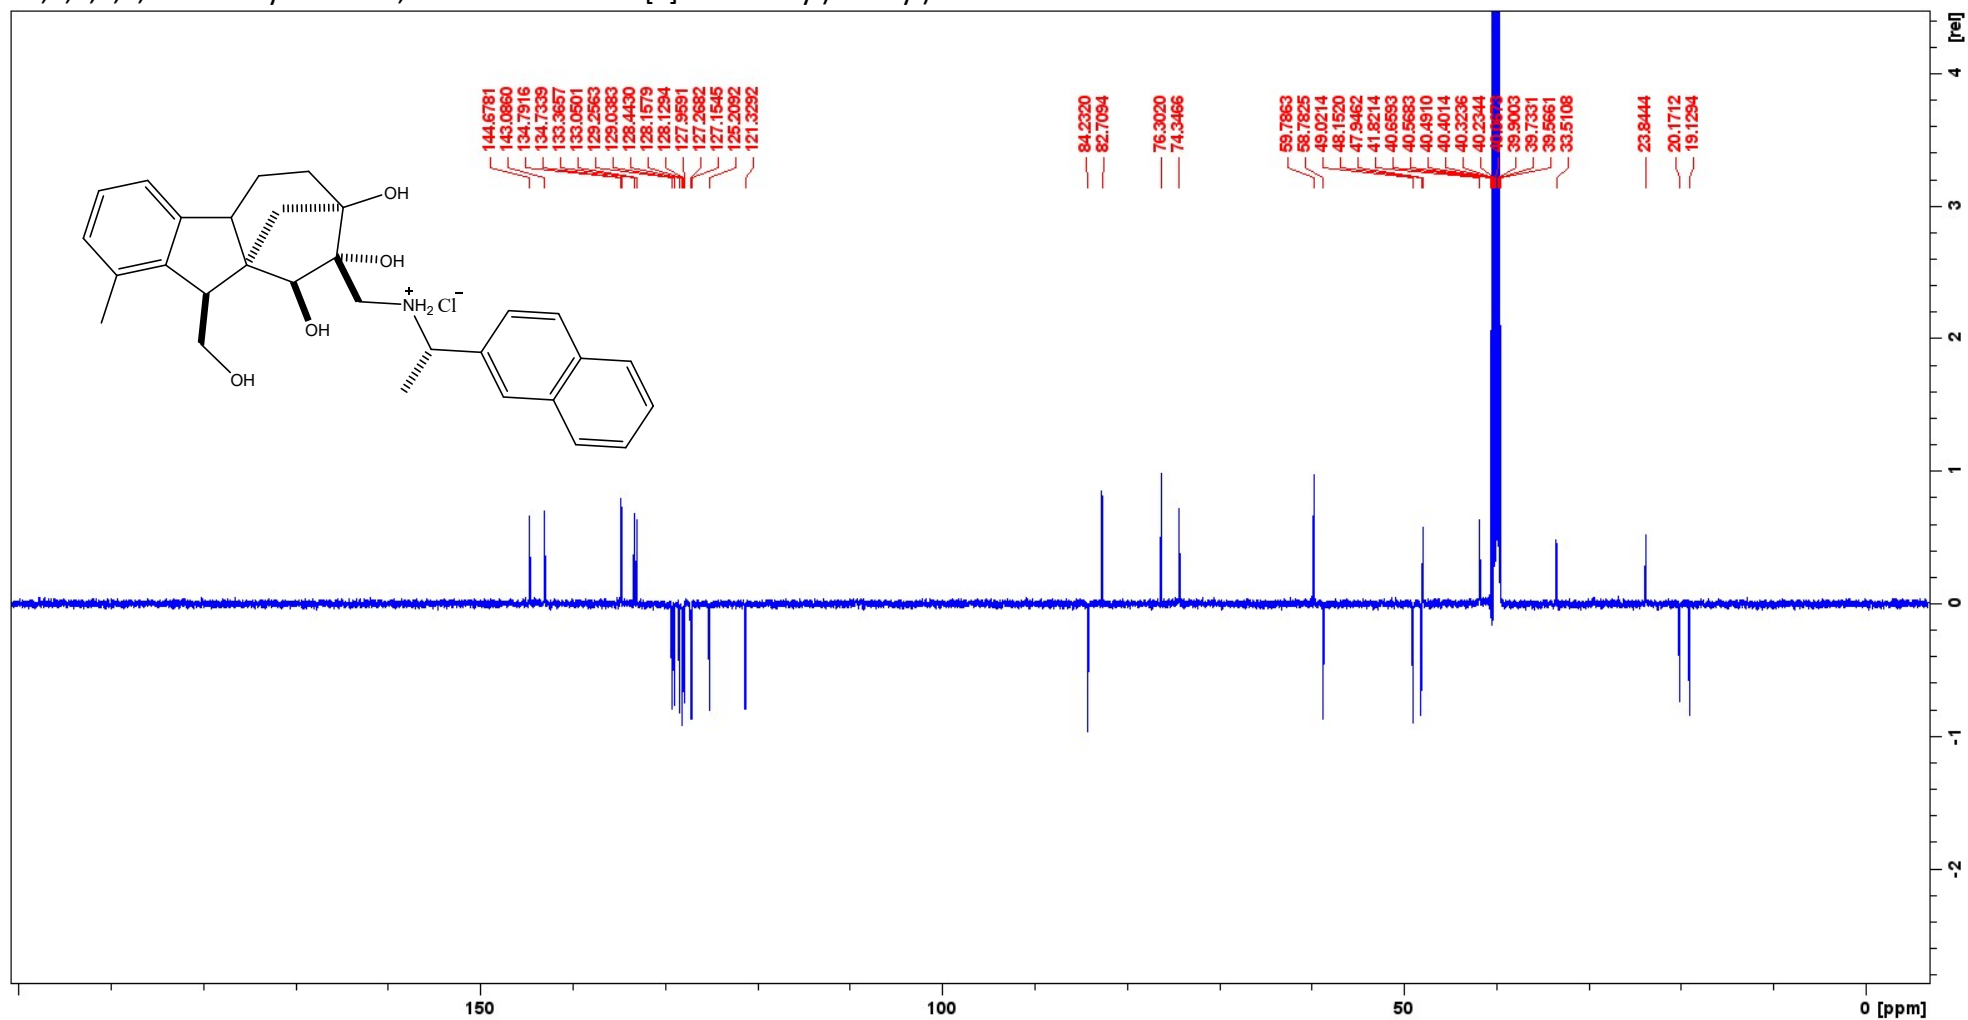

COSY of (1S)-1-(Naphthalen-2-yl)-N-(((7S,8R,9S,9aR,10S)-7,8,9-trihydroxy-10-(hydroxymethyl)-1-methyl-4b,6,7,8,9,10-hexahydro-5H-7,9a-methanobenzo[a]azulen-8-yl)methyl)ethan-1-aminium chloride **23**

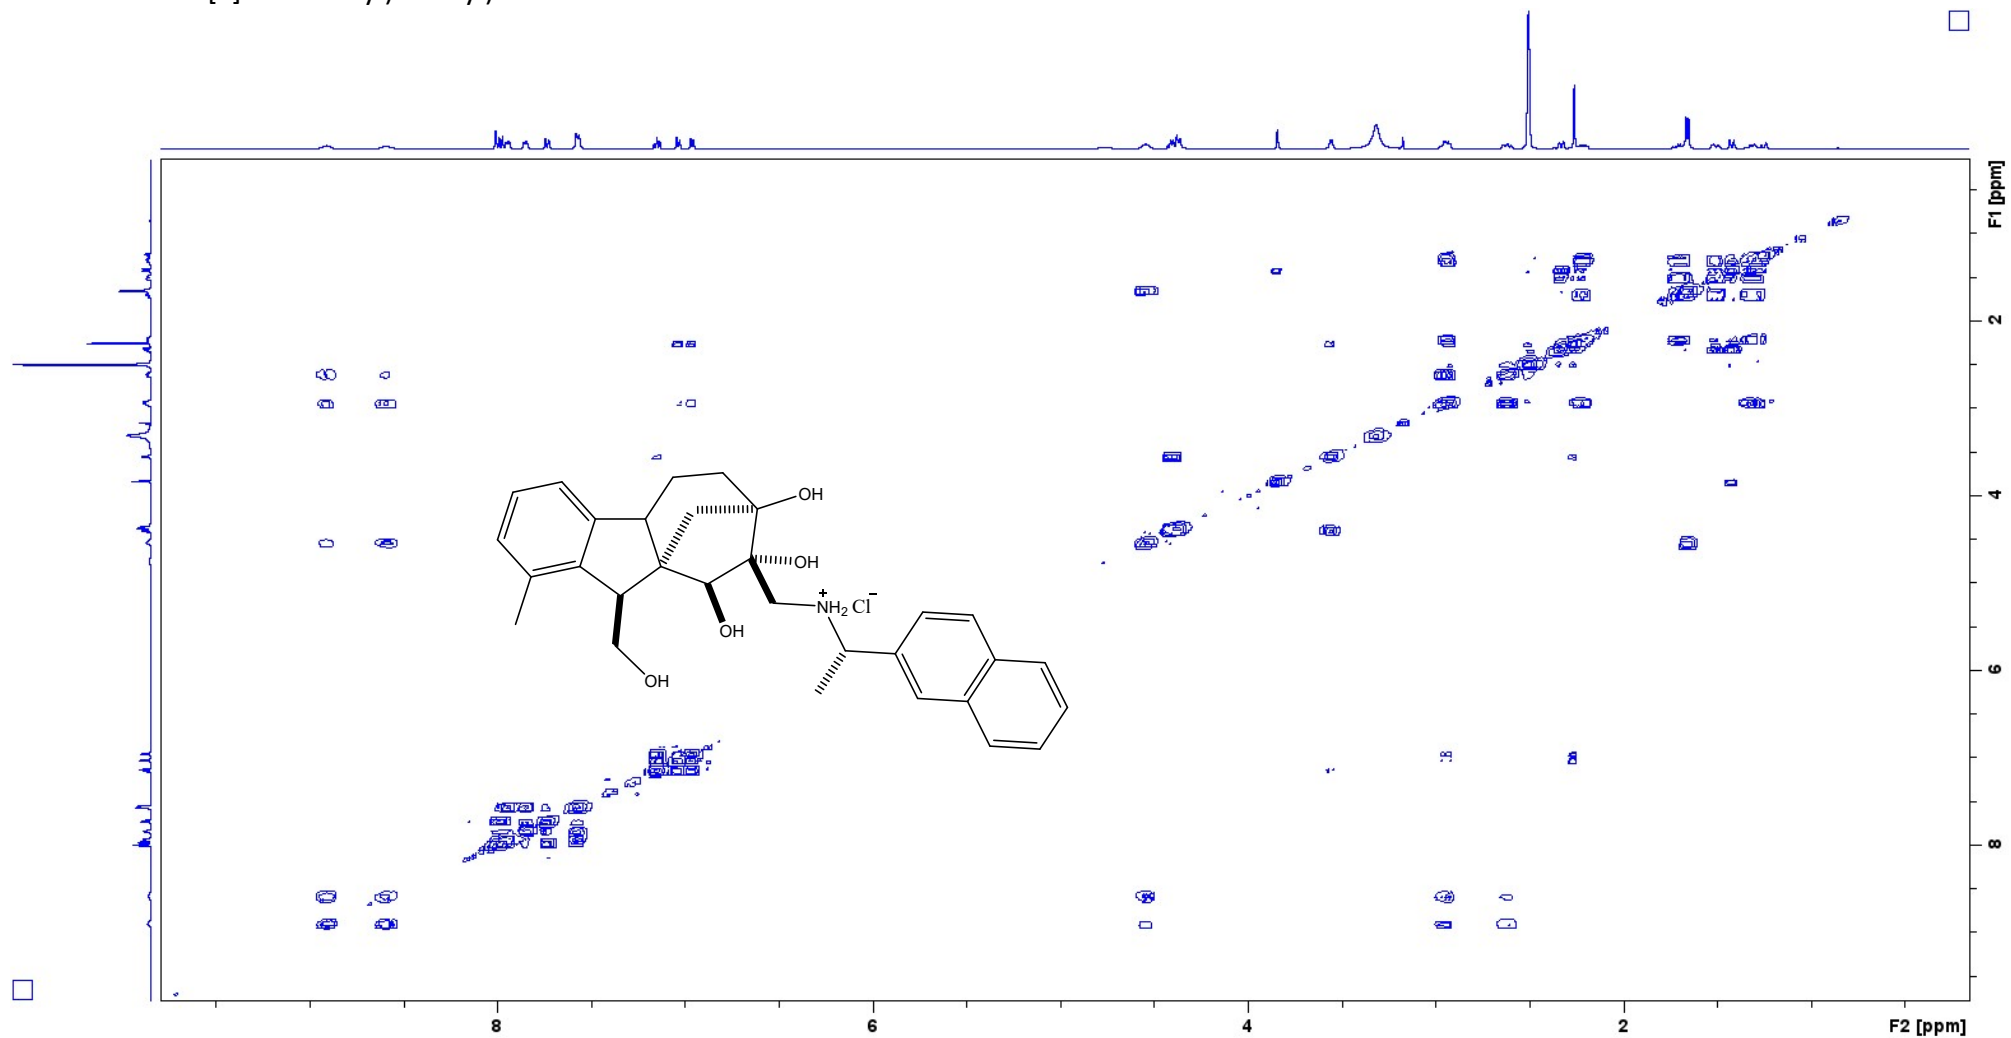

NOESY of (1S)-1-(Naphthalen-2-yl)-N-(((7S,8R,9S,9aR,10S)-7,8,9-trihydroxy-10-(hydroxymethyl)-1-methyl-4b,6,7,8,9,10-hexahydro-5H-7,9a-methanobenzo[a]azulen-8-yl)methyl)ethan-1-aminium chloride **23**

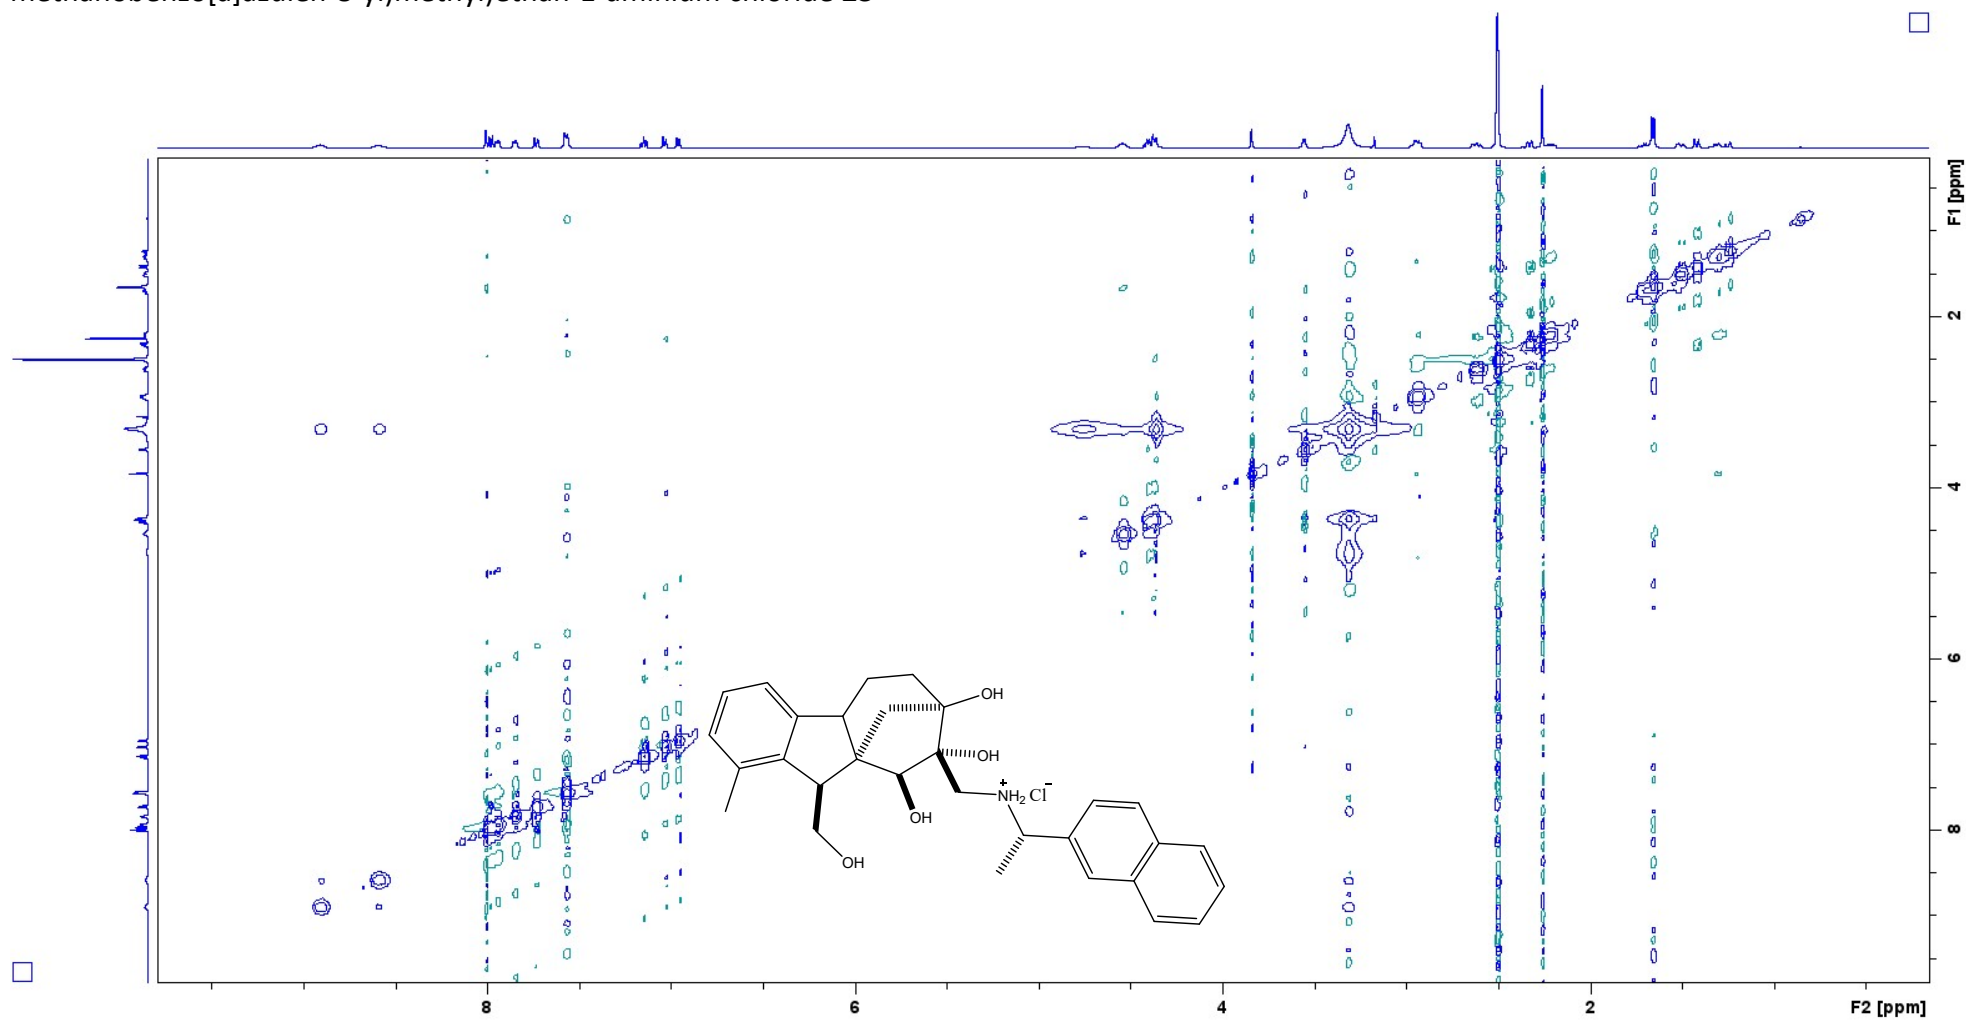

HSQC of (1S)-1-(Naphthalen-2-yl)-N-(((7S,8R,9S,9aR,10S)-7,8,9-trihydroxy-10-(hydroxymethyl)-1-methyl-4b,6,7,8,9,10-hexahydro-5H-7,9a-methanobenzo[a]azulen-8-yl)methyl)ethan-1-aminium chloride **23**

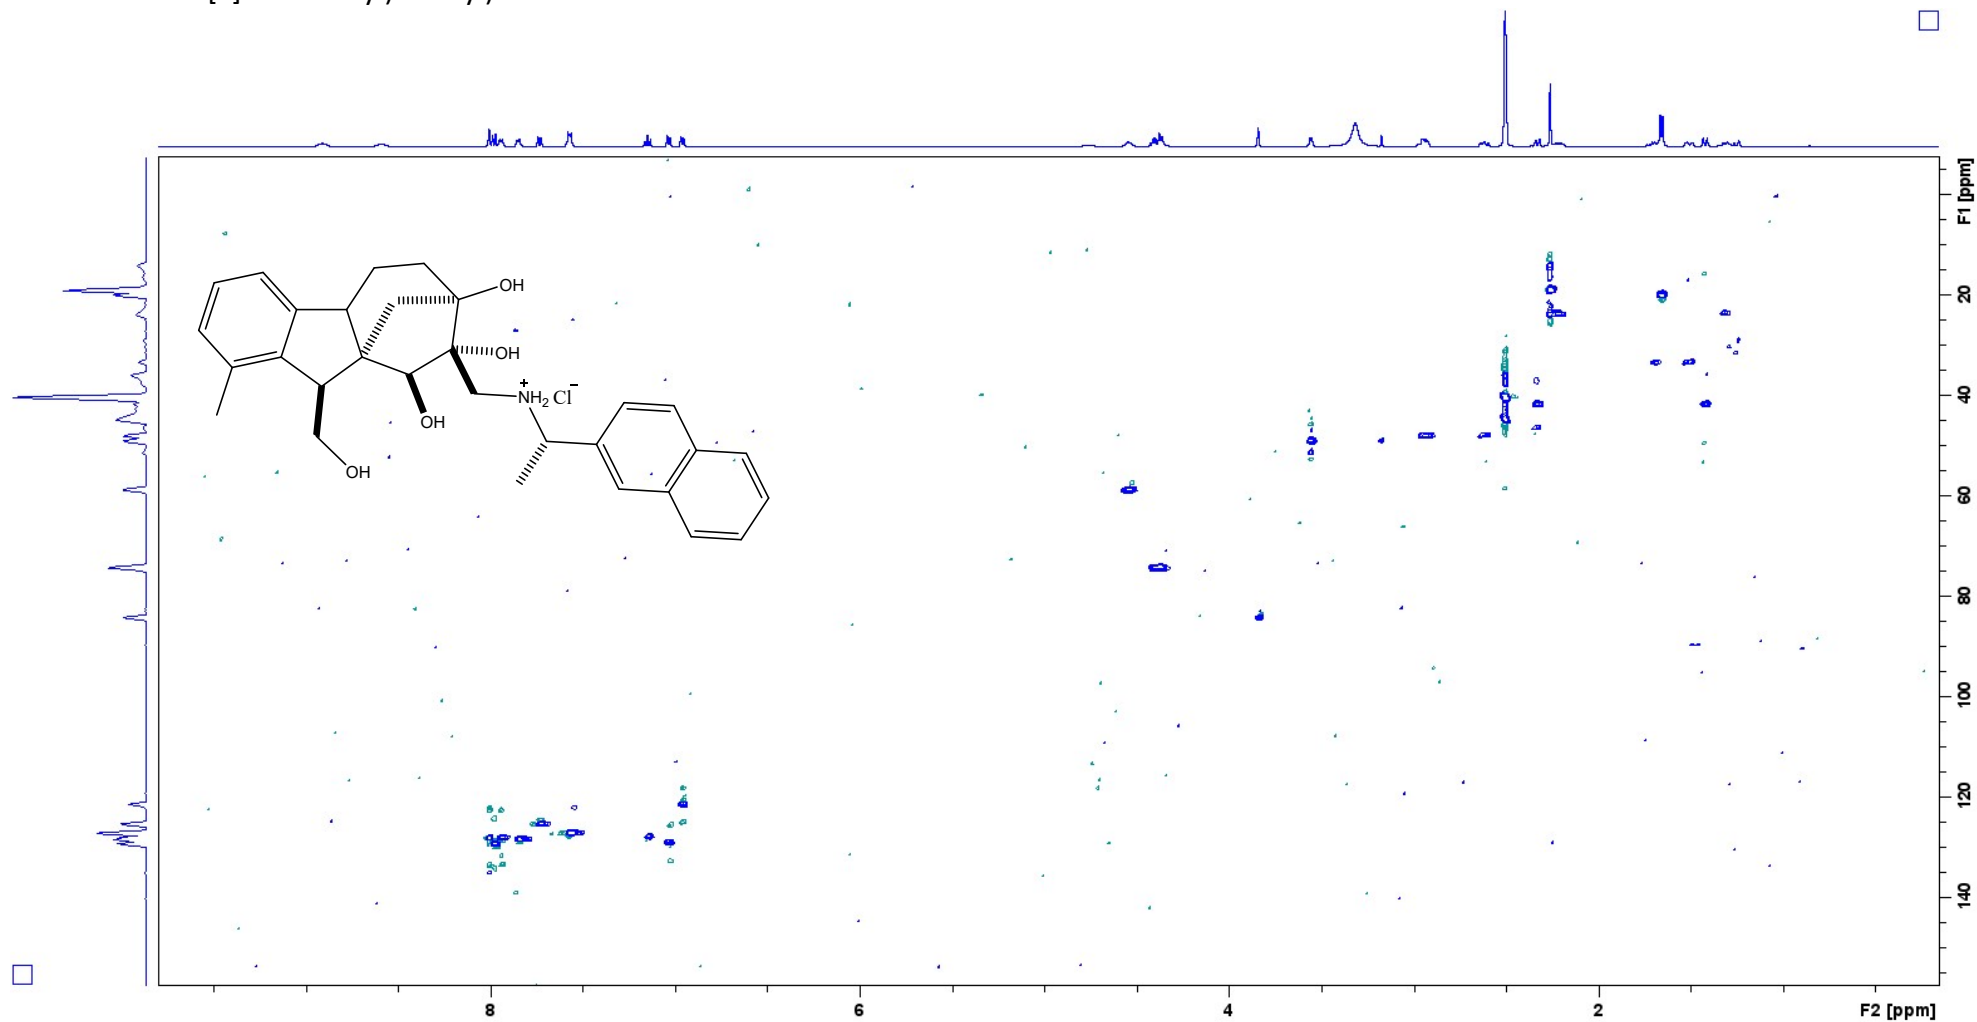

HMBC of (1S)-1-(Naphthalen-2-yl)-N-(((7S,8R,9S,9aR,10S)-7,8,9-trihydroxy-10-(hydroxymethyl)-1-methyl-4b,6,7,8,9,10-hexahydro-5H-7,9a-methanobenzo[a]azulen-8-yl)methyl)ethan-1-aminium chloride **23**

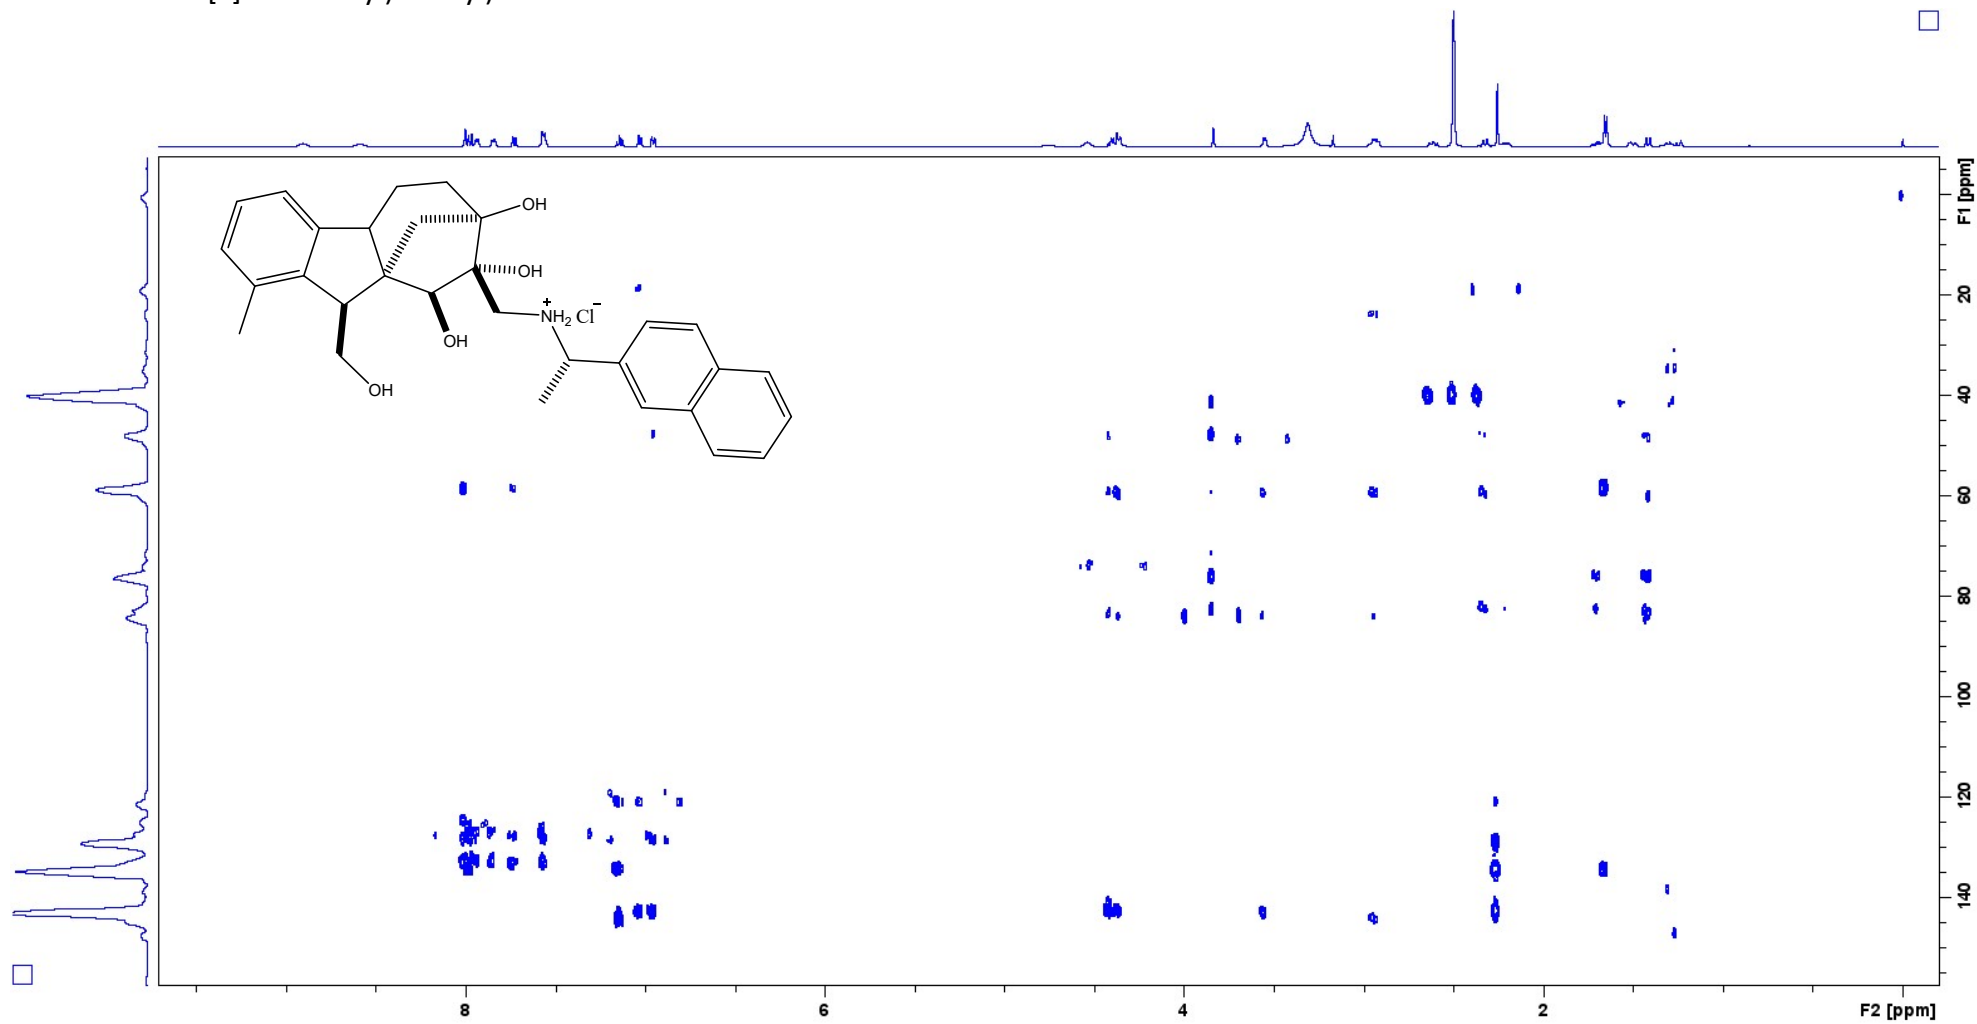

$^1\text{H-NMR}$  (500 MHz) of (1*R*)-1-(Naphthalen-2-yl)-*N*-(((7*S*,8*R*,9*S*,9*aR*,10*S*)-7,8,9-trihydroxy-10-(hydroxymethyl)-1-methyl-4b,6,7,8,9,10-hexahydro-5*H*-7,9a-methanobenzo[*a*]azulen-8-yl)methyl)ethan-1-aminium chloride **24**

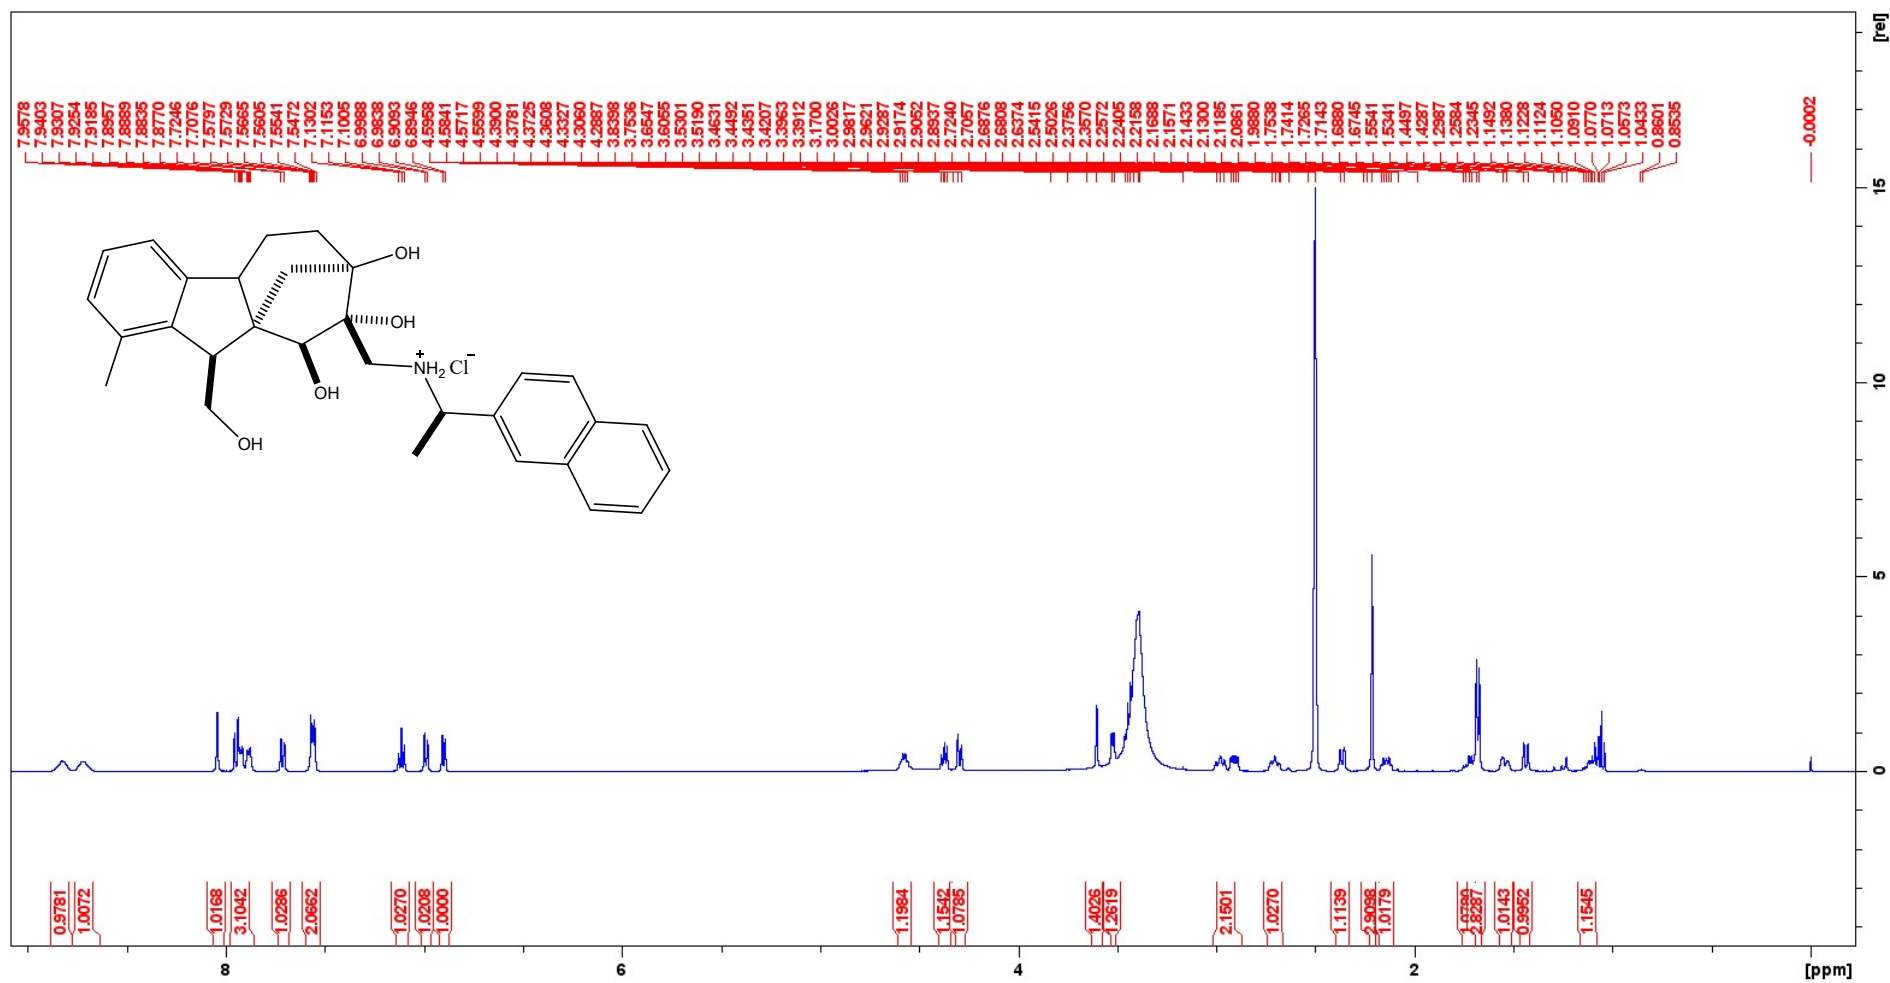



$^{13}\text{C}\{^1\text{H}\}$  J-MOD NMR (125 MHz) of (1*R*)-1-(Naphthalen-2-yl)-*N*-(((7*S*,8*R*,9*S*,9*aR*,10*S*)-7,8,9-trihydroxy-10-(hydroxymethyl)-1-methyl-4*b*,6,7,8,9,10-hexahydro-5*H*-7,9*a*-methanobenzo[*a*]azulen-8-yl)methyl)ethan-1-aminium chloride **24**

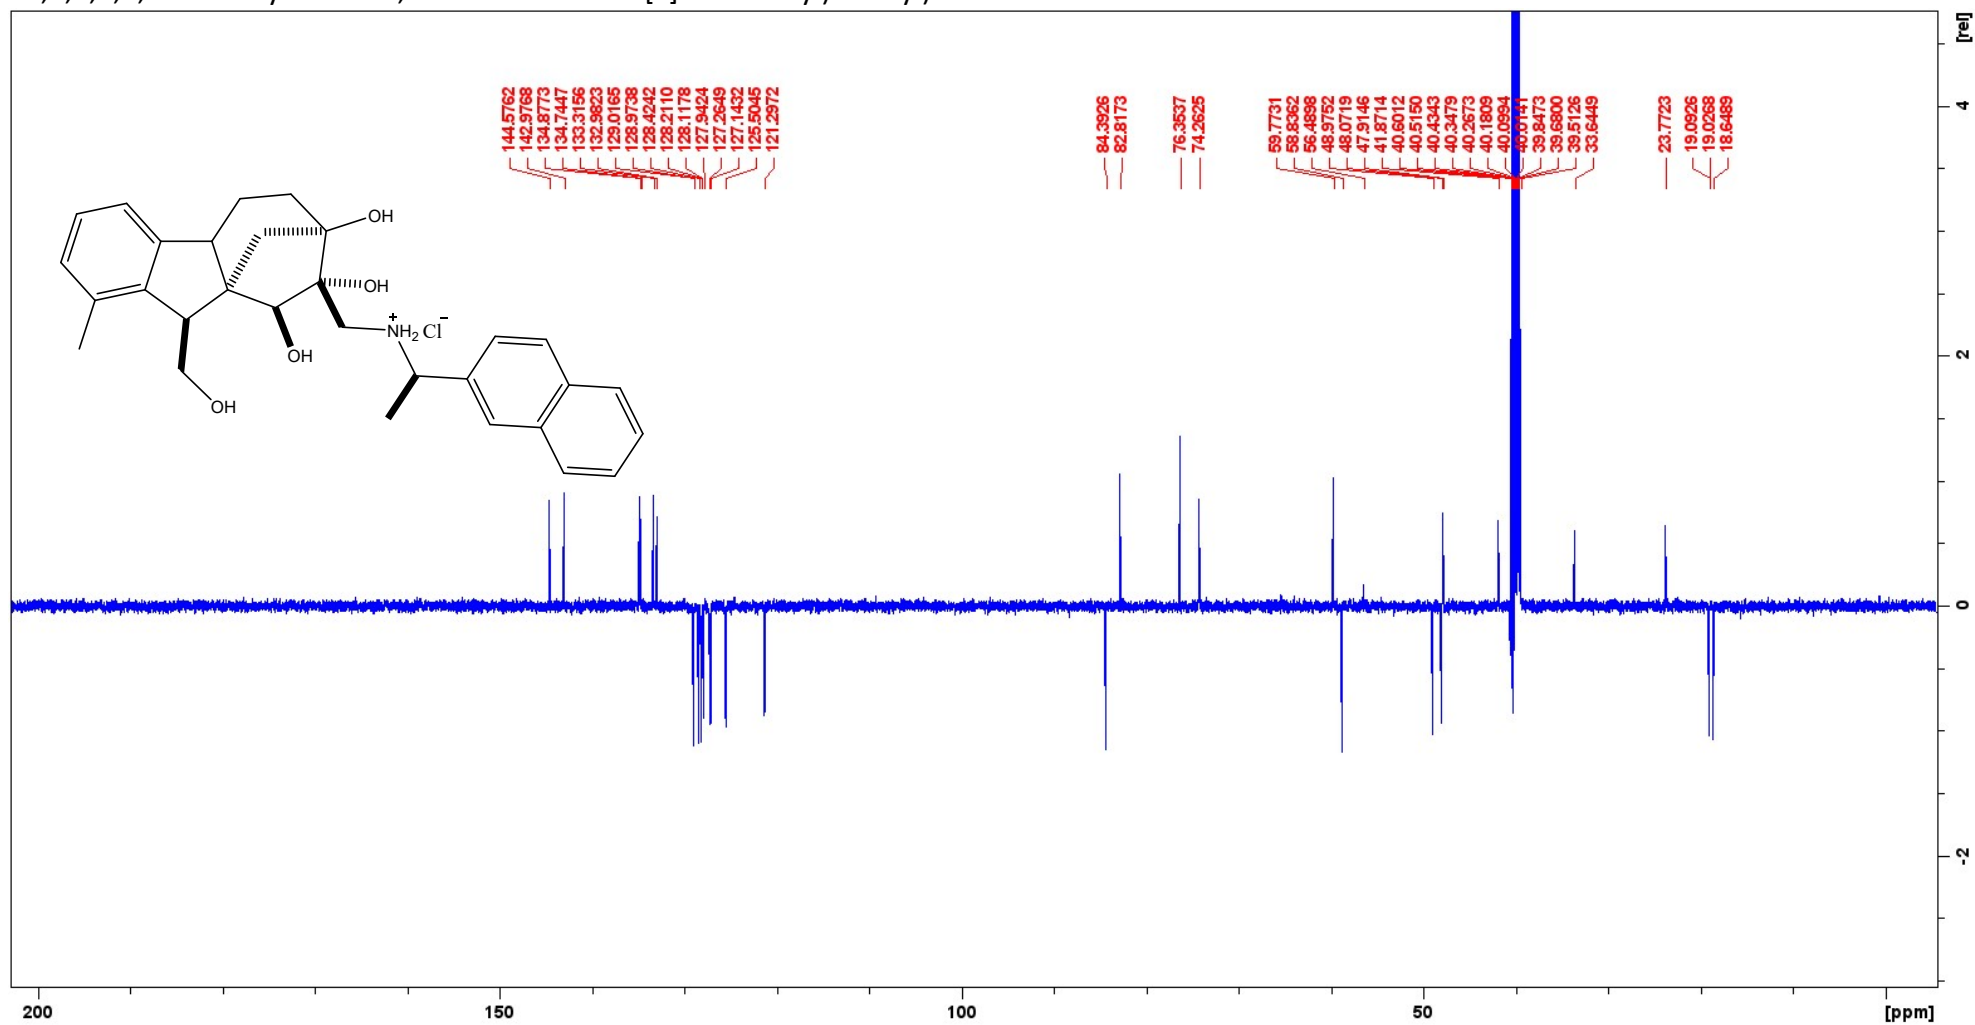

COSY of (1*R*)-1-(Naphthalen-2-yl)-*N*-(((7*S*,8*R*,9*S*,9*aR*,10*S*)-7,8,9-trihydroxy-10-(hydroxymethyl)-1-methyl-4*b*,6,7,8,9,10-hexahydro-5*H*-7,9*a*-methanobenzo[*a*]azulen-8-yl)methyl)ethan-1-aminium chloride **24**

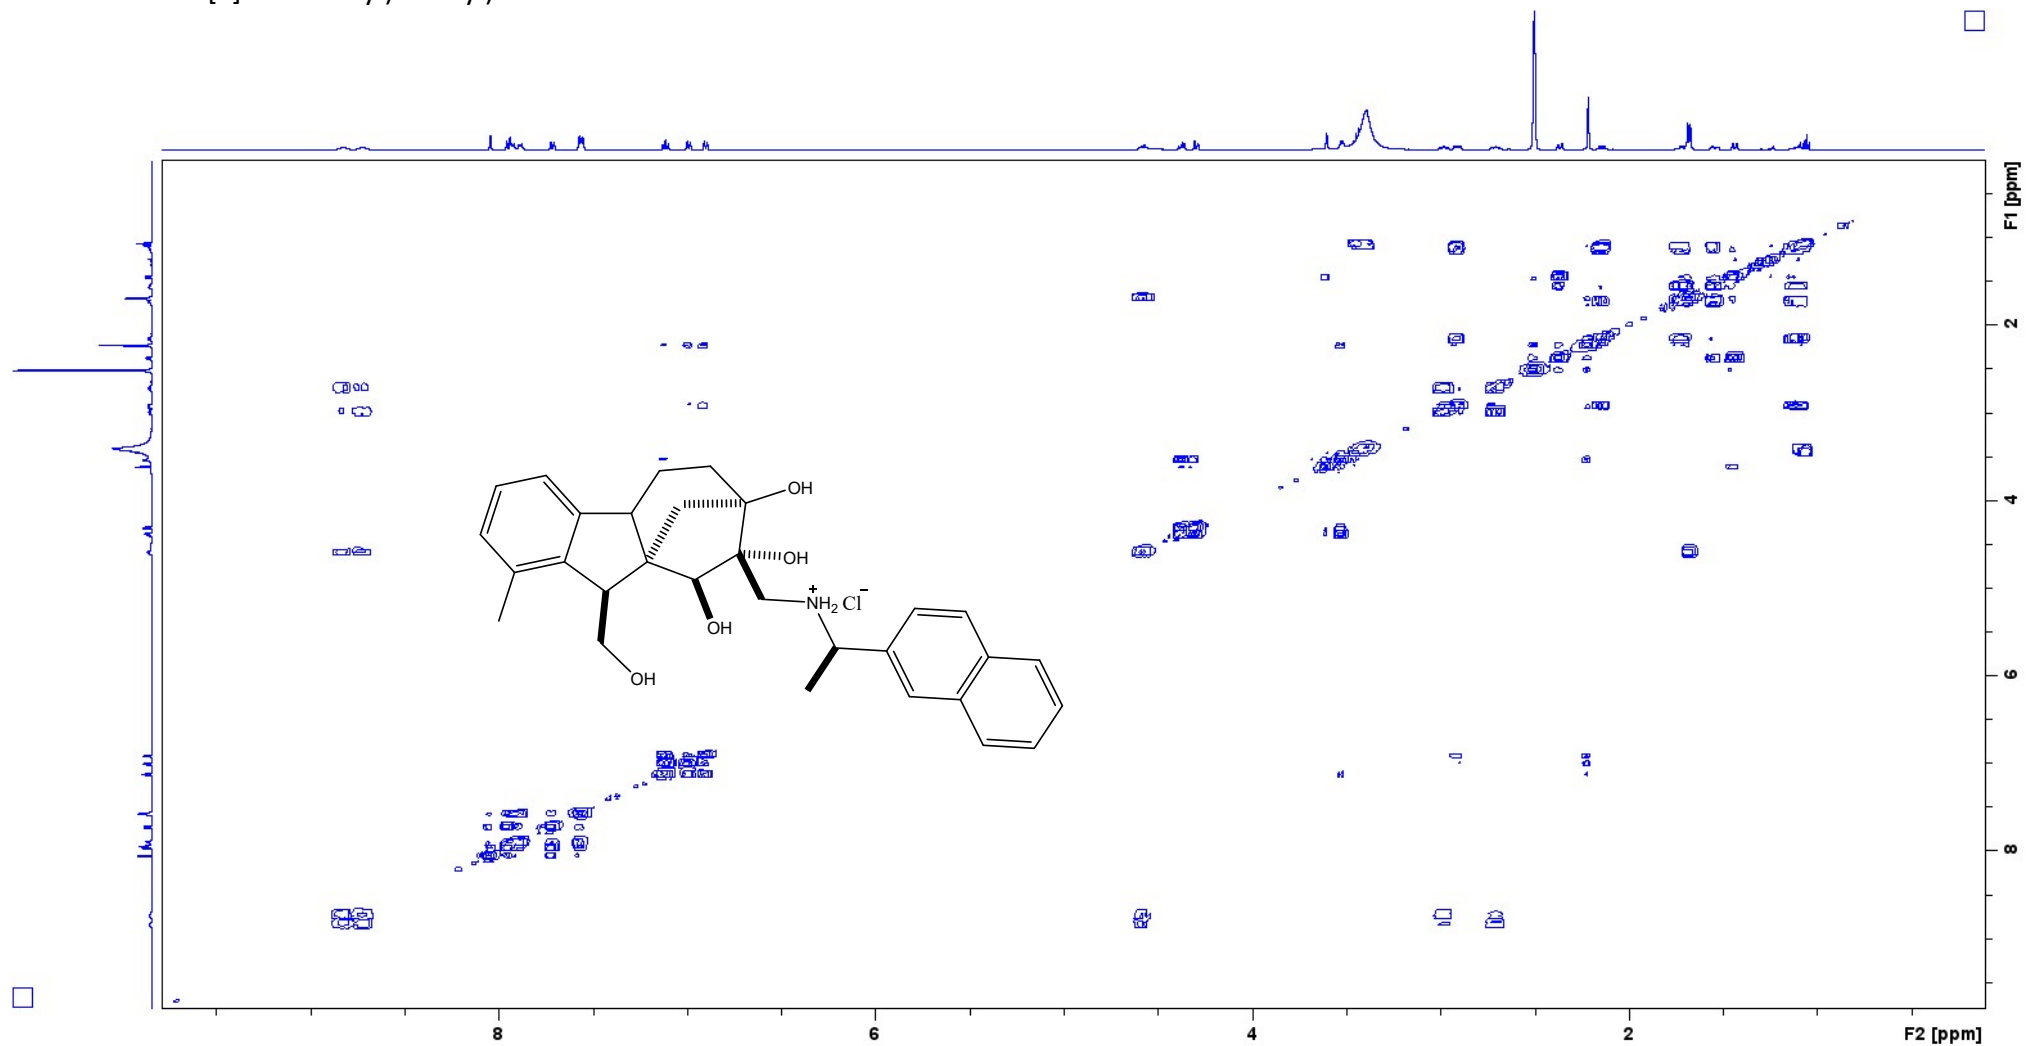

NOESY of (1*R*)-1-(Naphthalen-2-yl)-*N*-(((7*S*,8*R*,9*S*,9*aR*,10*S*)-7,8,9-trihydroxy-10-(hydroxymethyl)-1-methyl-4b,6,7,8,9,10-hexahydro-5*H*-7,9a-methanobenzo[*a*]azulen-8-yl)methyl)ethan-1-aminium chloride **24**

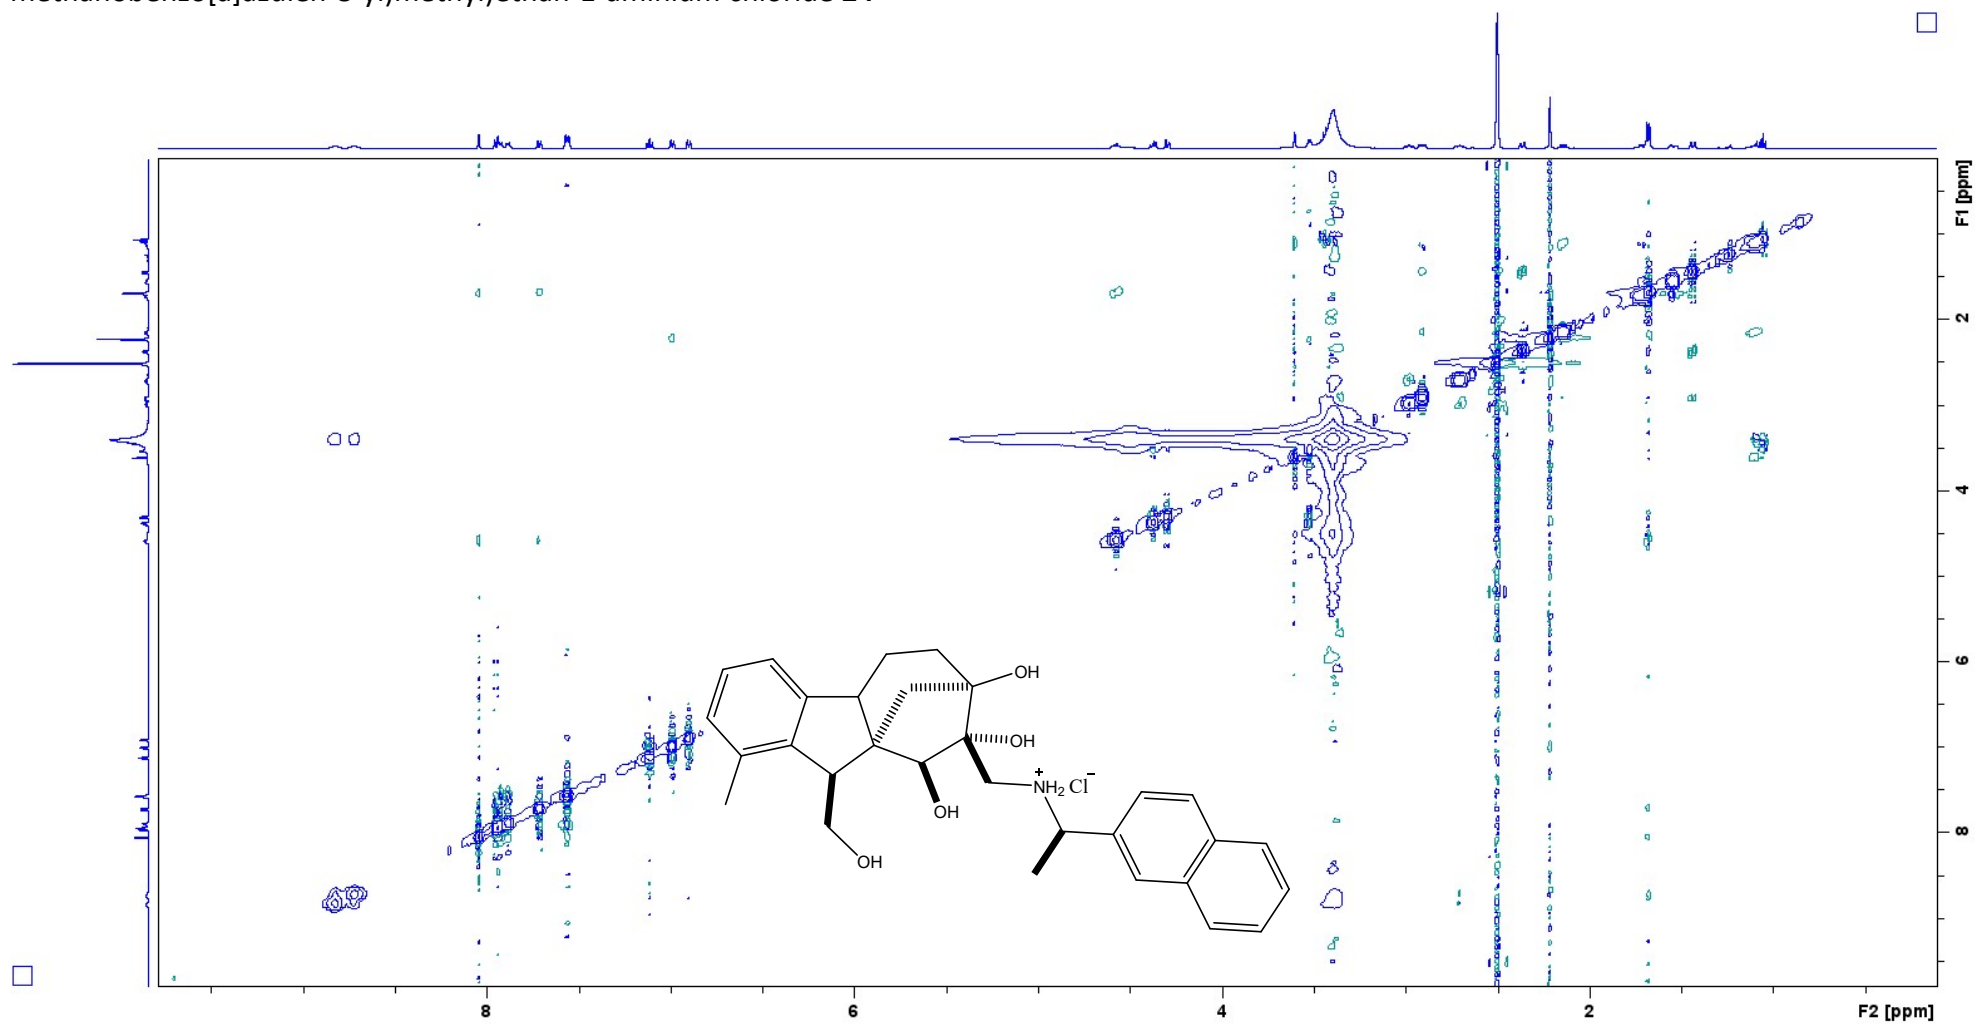

HSQC of (1*R*)-1-(Naphthalen-2-yl)-*N*-(((7*S*,8*R*,9*S*,9*aR*,10*S*)-7,8,9-trihydroxy-10-(hydroxymethyl)-1-methyl-4b,6,7,8,9,10-hexahydro-5*H*-7,9a-methanobenzo[*a*]azulen-8-yl)methyl)ethan-1-aminium chloride **24**

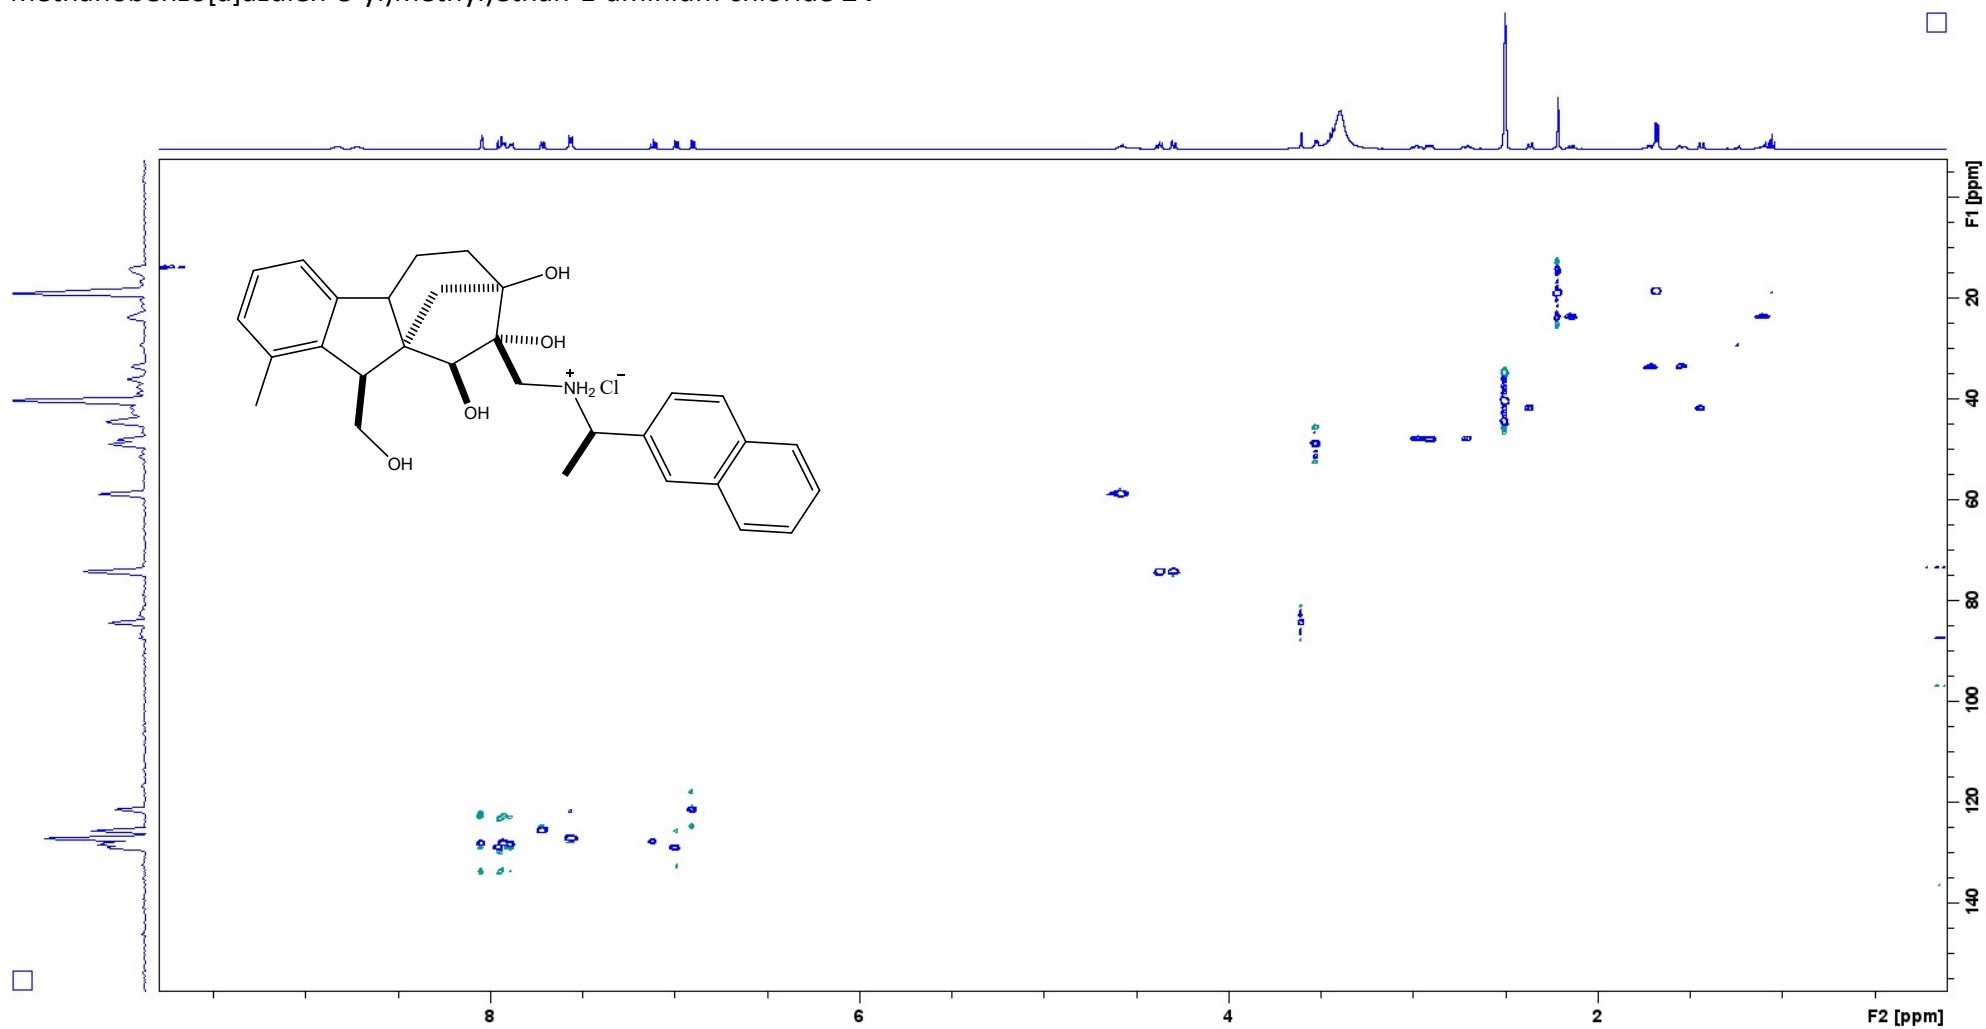

HMBC of (1*R*)-1-(Naphthalen-2-yl)-*N*-(((7*S*,8*R*,9*S*,9*aR*,10*S*)-7,8,9-trihydroxy-10-(hydroxymethyl)-1-methyl-4*b*,6,7,8,9,10-hexahydro-5*H*-7,9a-methanobenzo[*a*]azulen-8-yl)methyl)ethan-1-aminium chloride **24**

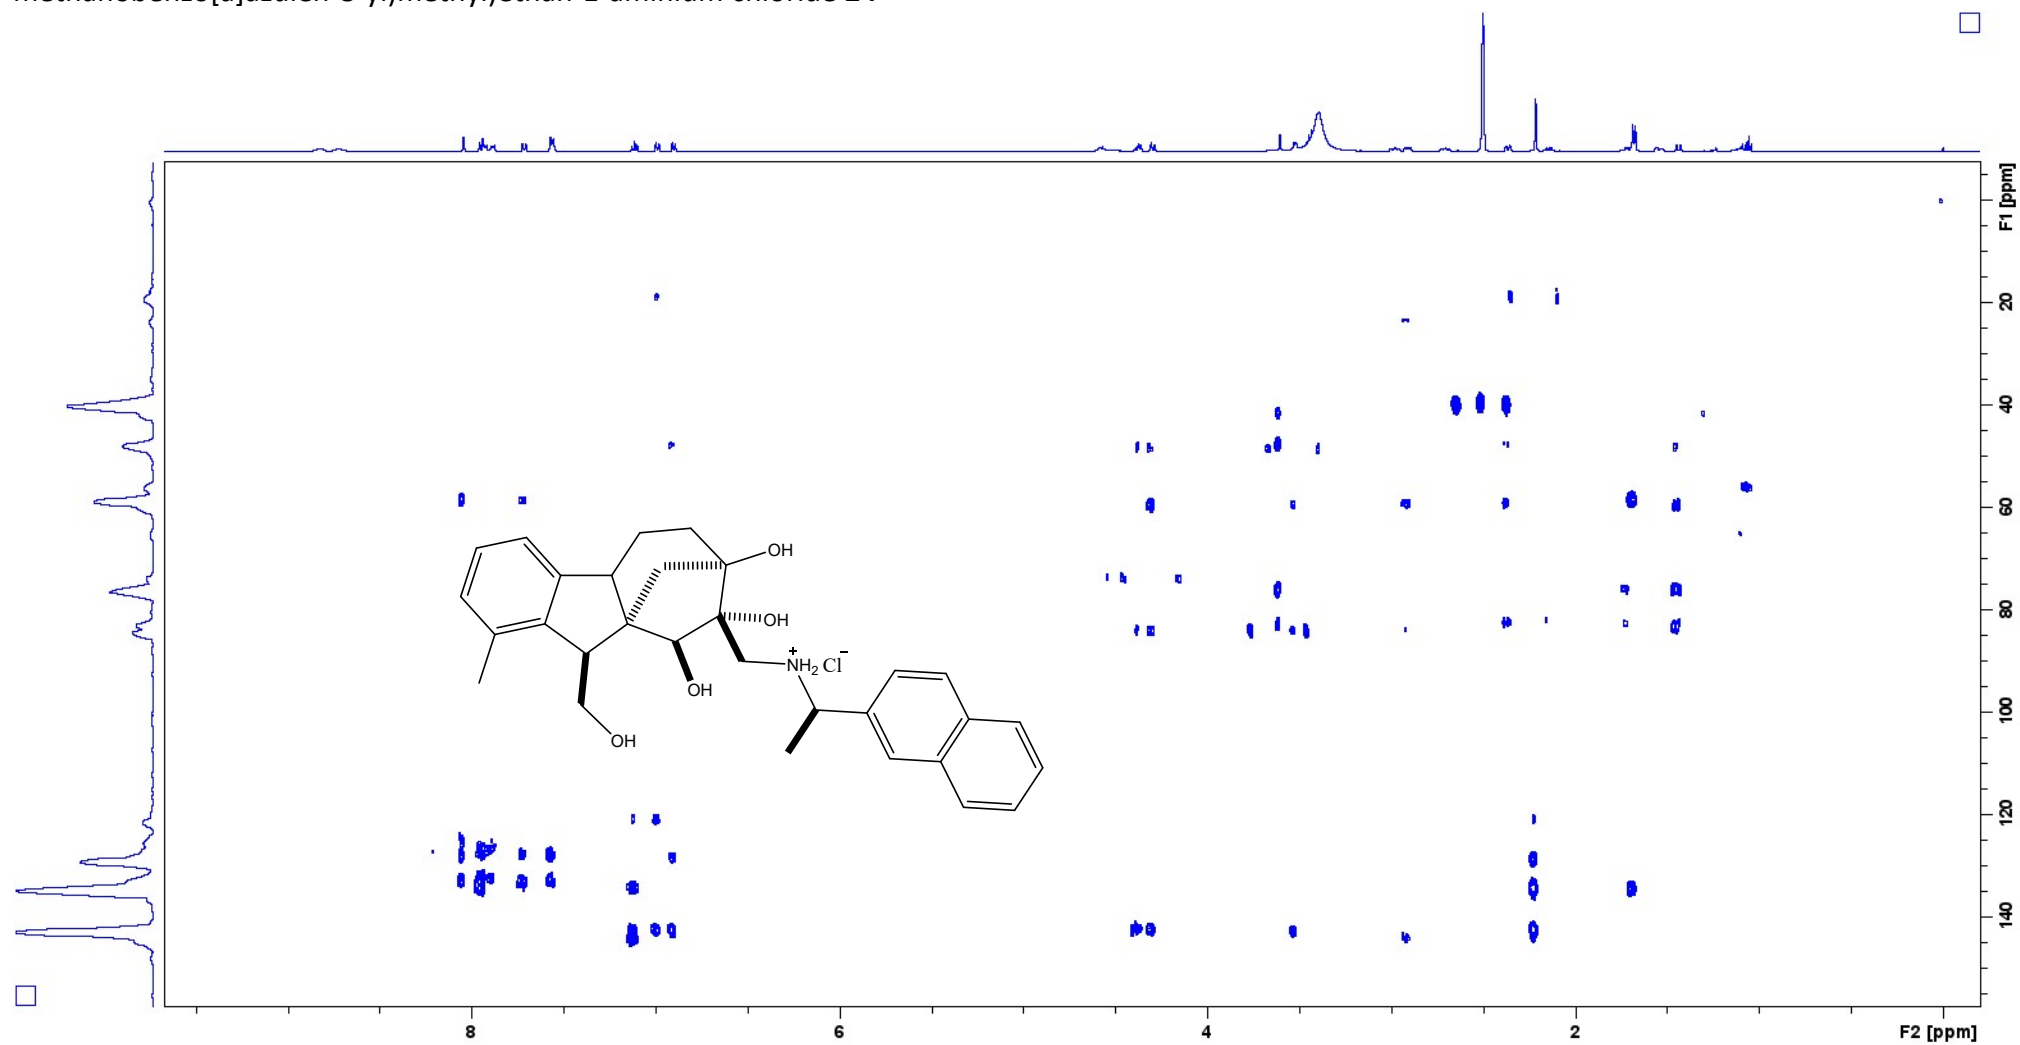

$^1\text{H-NMR}$  (500 MHz) of (1*S*)-1-(Naphthalen-1-yl)-*N*-(((7*S*,8*R*,9*S*,9*aR*,10*S*)-7,8,9-trihydroxy-10-(hydroxymethyl)-1-methyl-4*b*,6,7,8,9,10-hexahydro-5*H*-7,9*a*-methanobenzo[*a*]azulen-8-yl)methyl)ethan-1-aminium chloride **25**

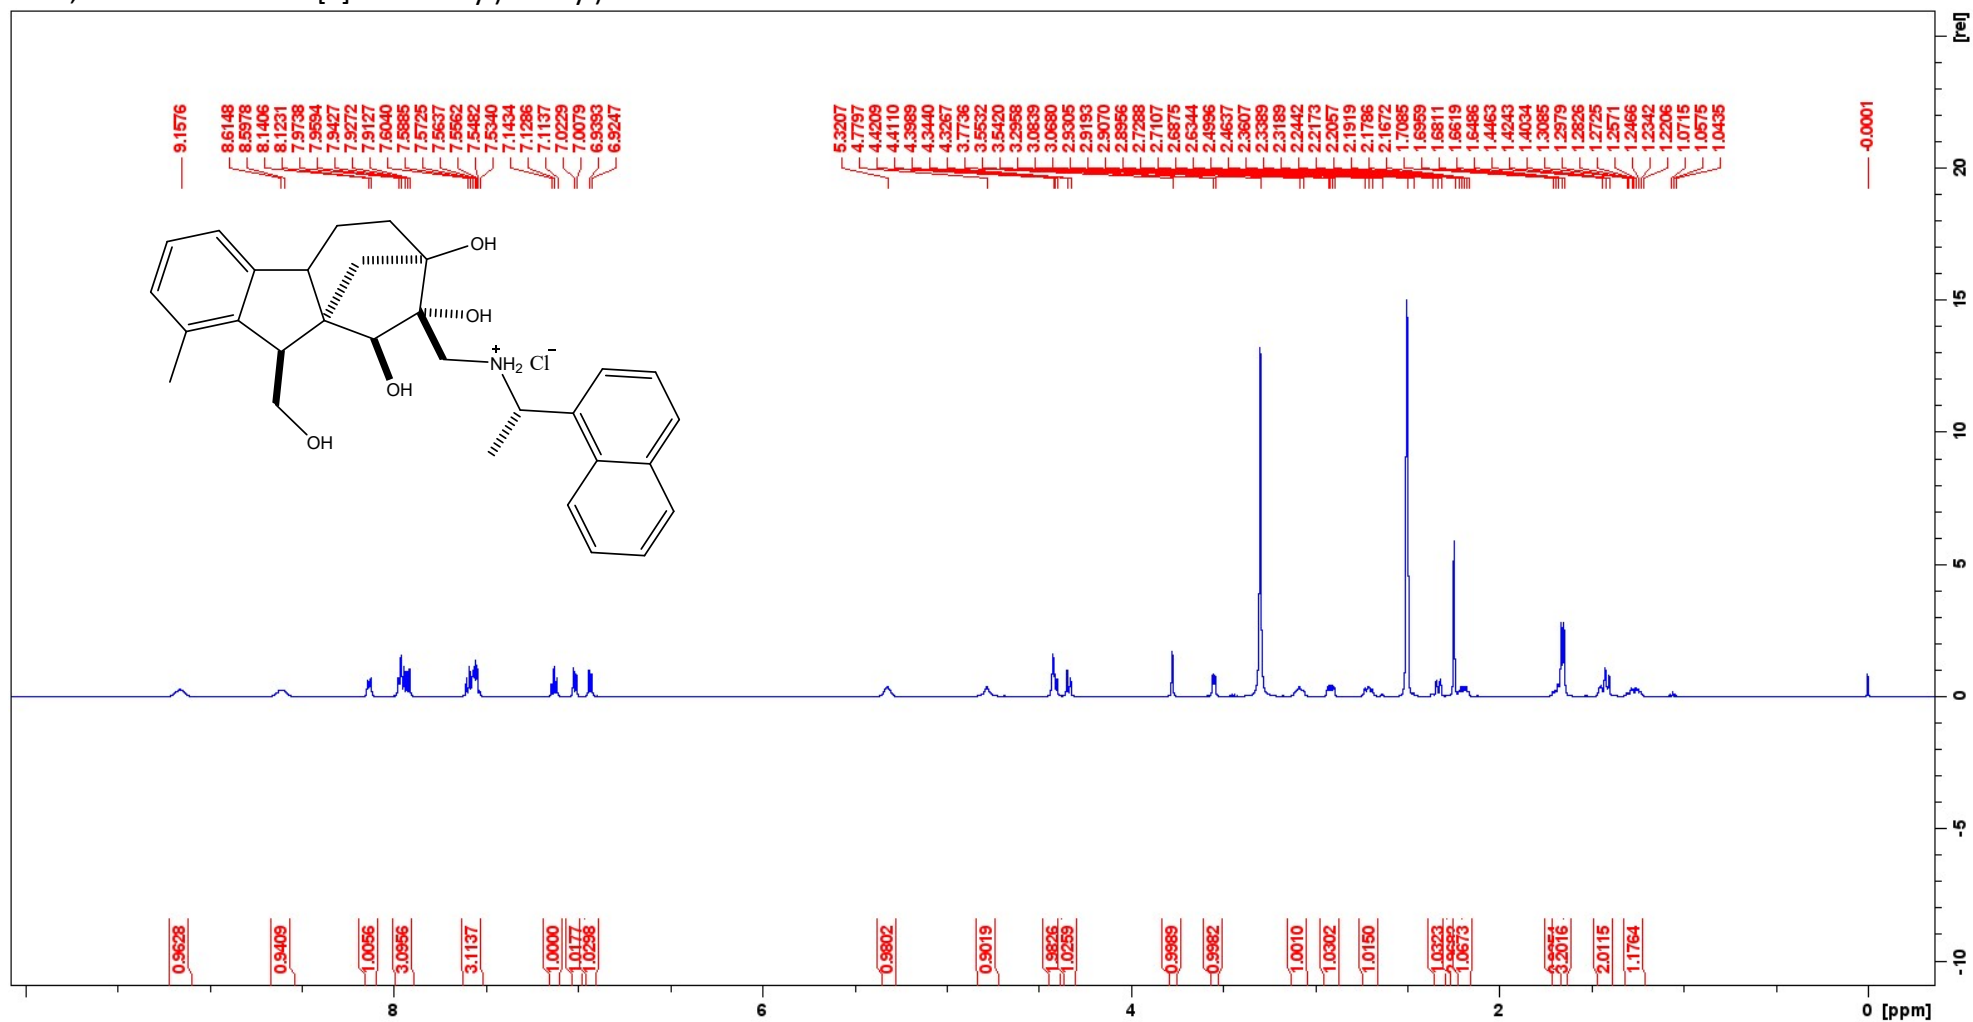

$^{13}\text{C}\{^1\text{H}\}$  *J*-MOD NMR (125 MHz) of (1*S*)-1-(Naphthalen-1-yl)-*N*-(((7*S*,8*R*,9*S*,9*aR*,10*S*)-7,8,9-trihydroxy-10-(hydroxymethyl)-1-methyl-4*b*,6,7,8,9,10-hexahydro-5*H*-7,9*a*-methanobenzo[*a*]azulen-8-yl)methyl)ethan-1-aminium chloride **25**

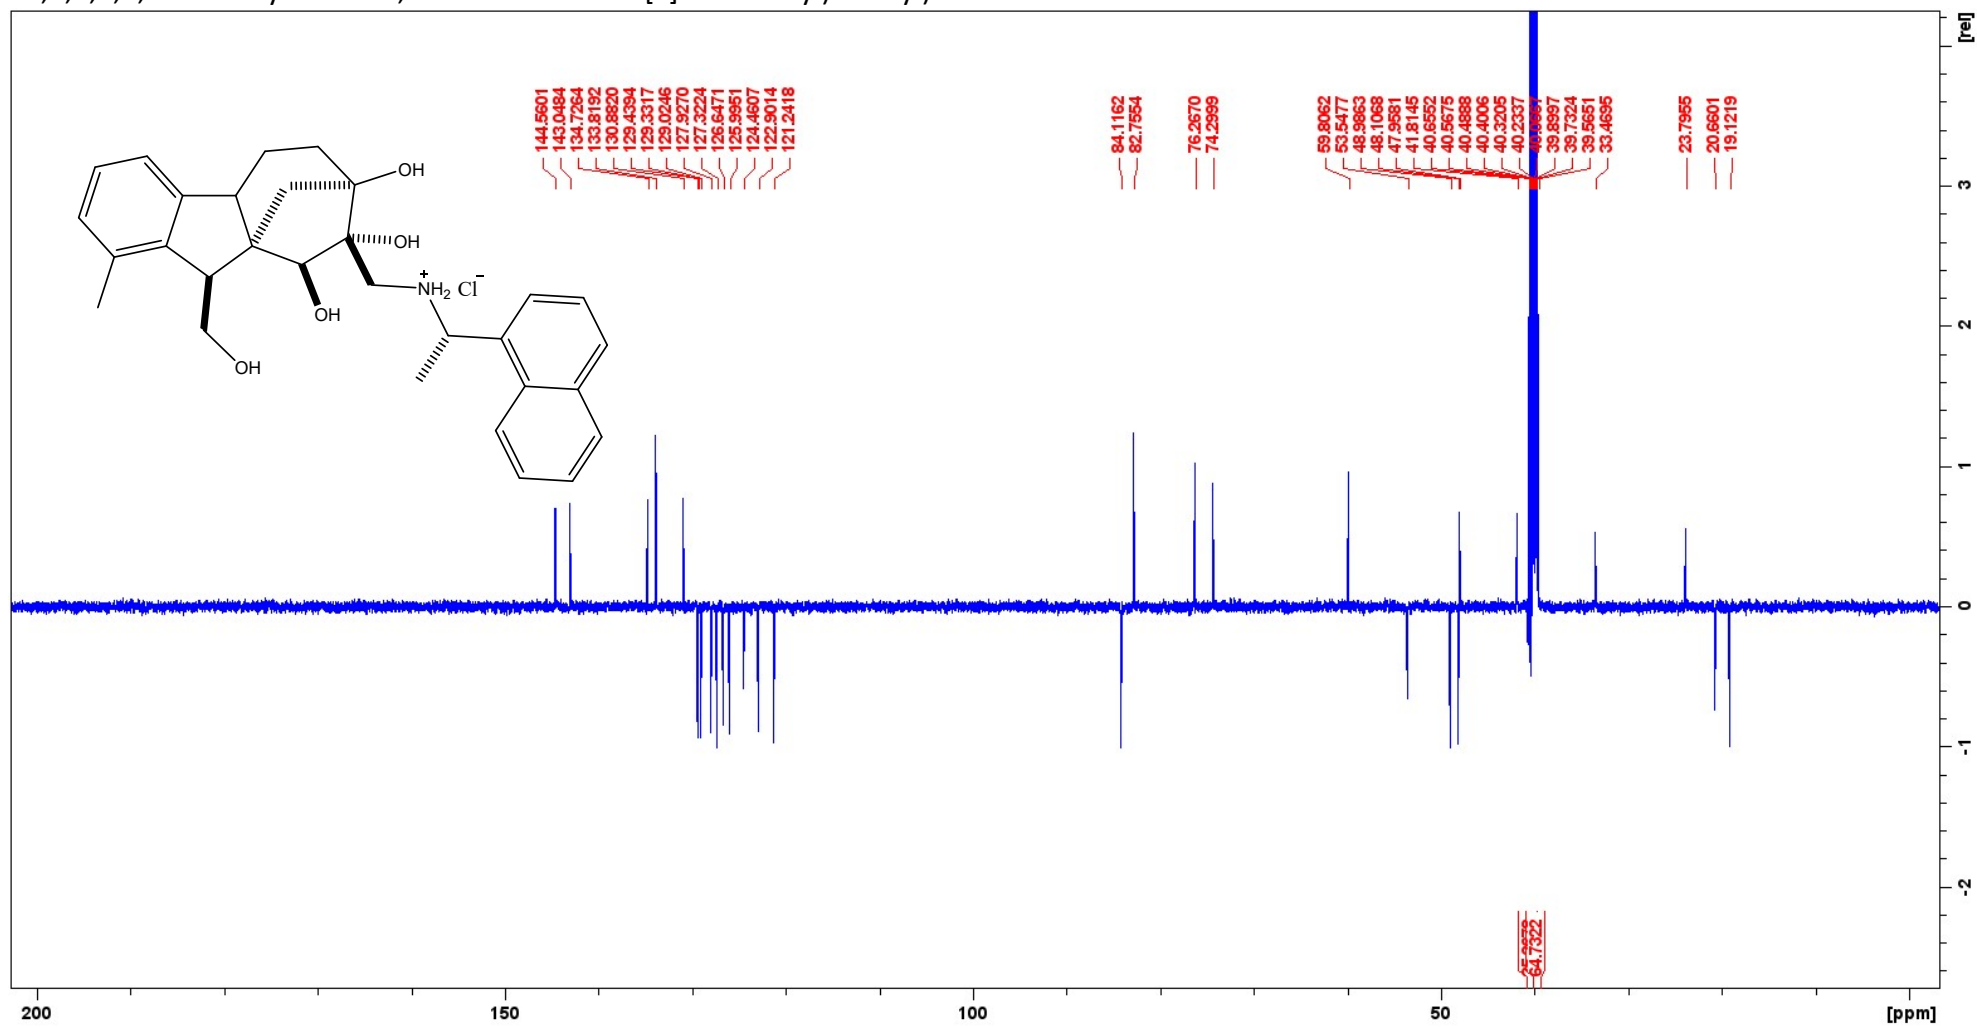

COSY of (1S)-1-(Naphthalen-1-yl)-N-(((7S,8R,9S,9aR,10S)-7,8,9-trihydroxy-10-(hydroxymethyl)-1-methyl-4b,6,7,8,9,10-hexahydro-5H-7,9a-methanobenzo[a]azulen-8-yl)methyl)ethan-1-aminium chloride **25**

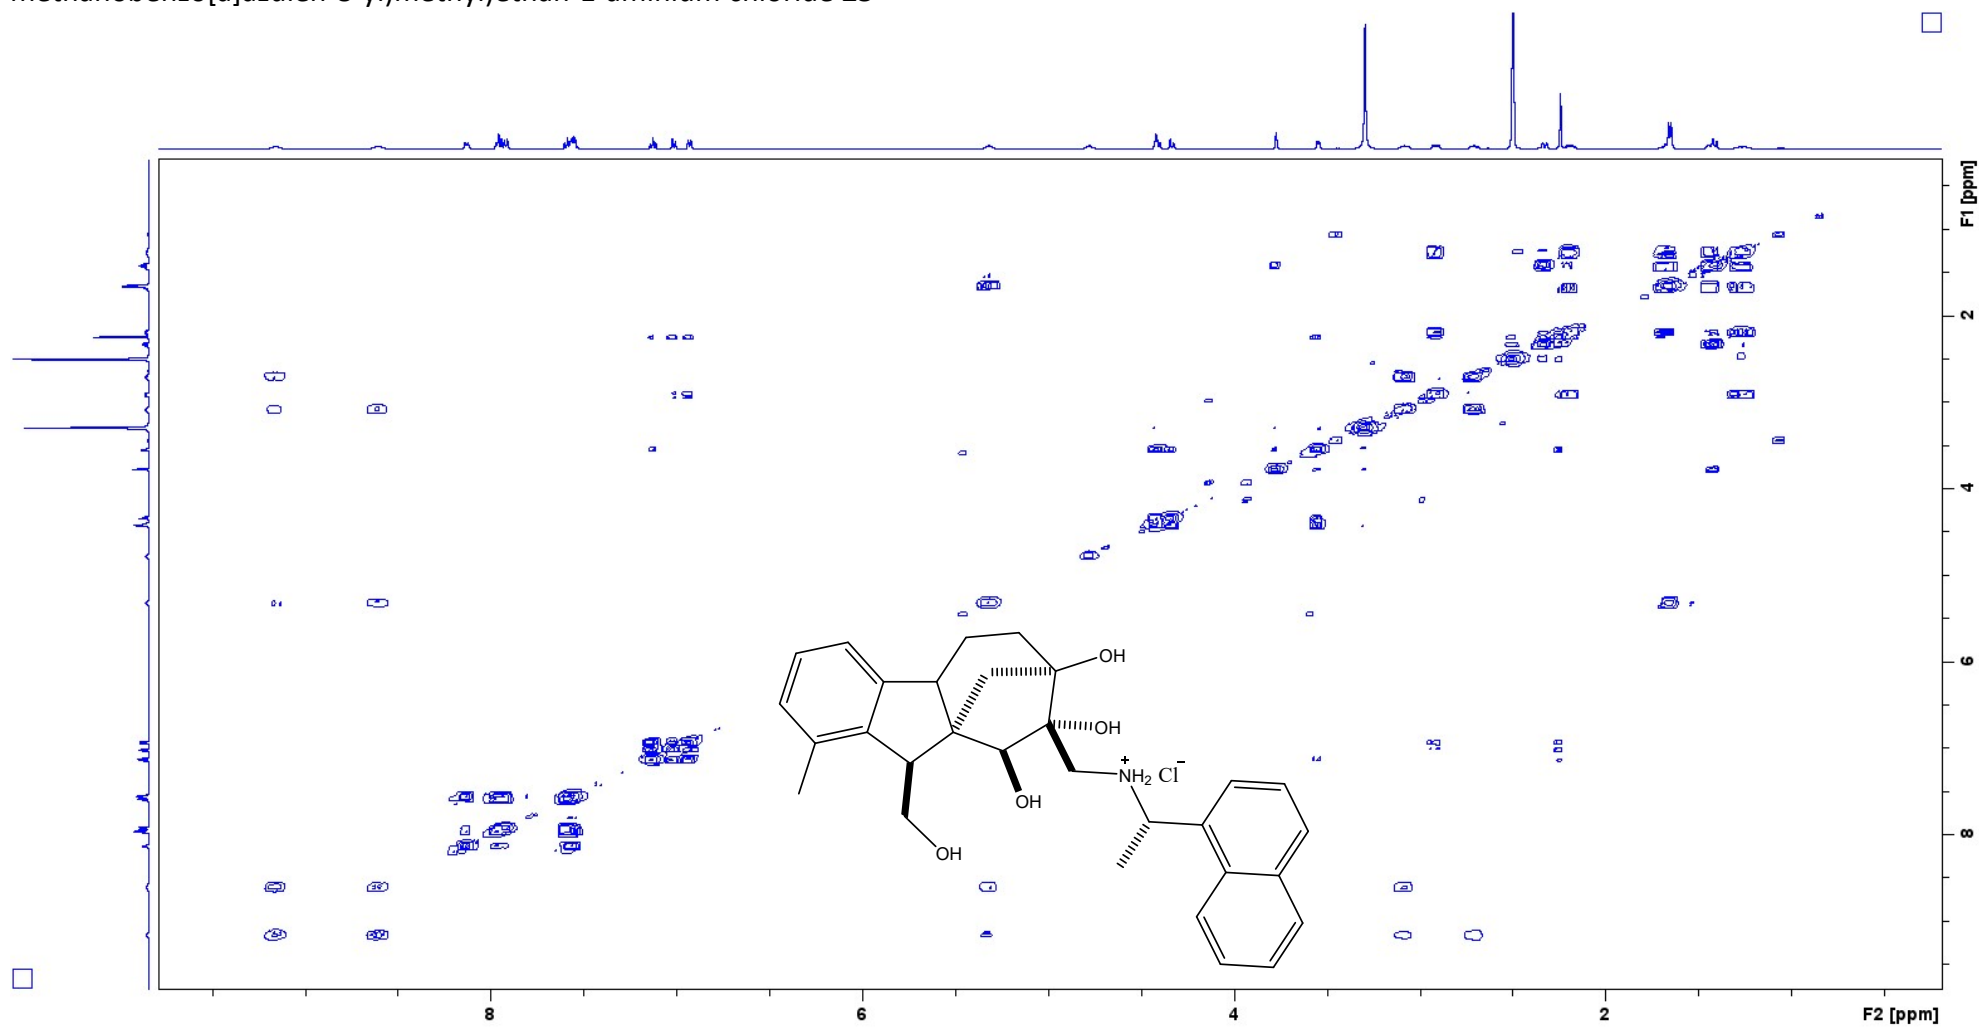



NOESY of (1S)-1-(Naphthalen-1-yl)-N-(((7S,8R,9S,9aR,10S)-7,8,9-trihydroxy-10-(hydroxymethyl)-1-methyl-4b,6,7,8,9,10-hexahydro-5H-7,9a-methanobenzo[a]azulen-8-yl)methyl)ethan-1-aminium chloride **25**

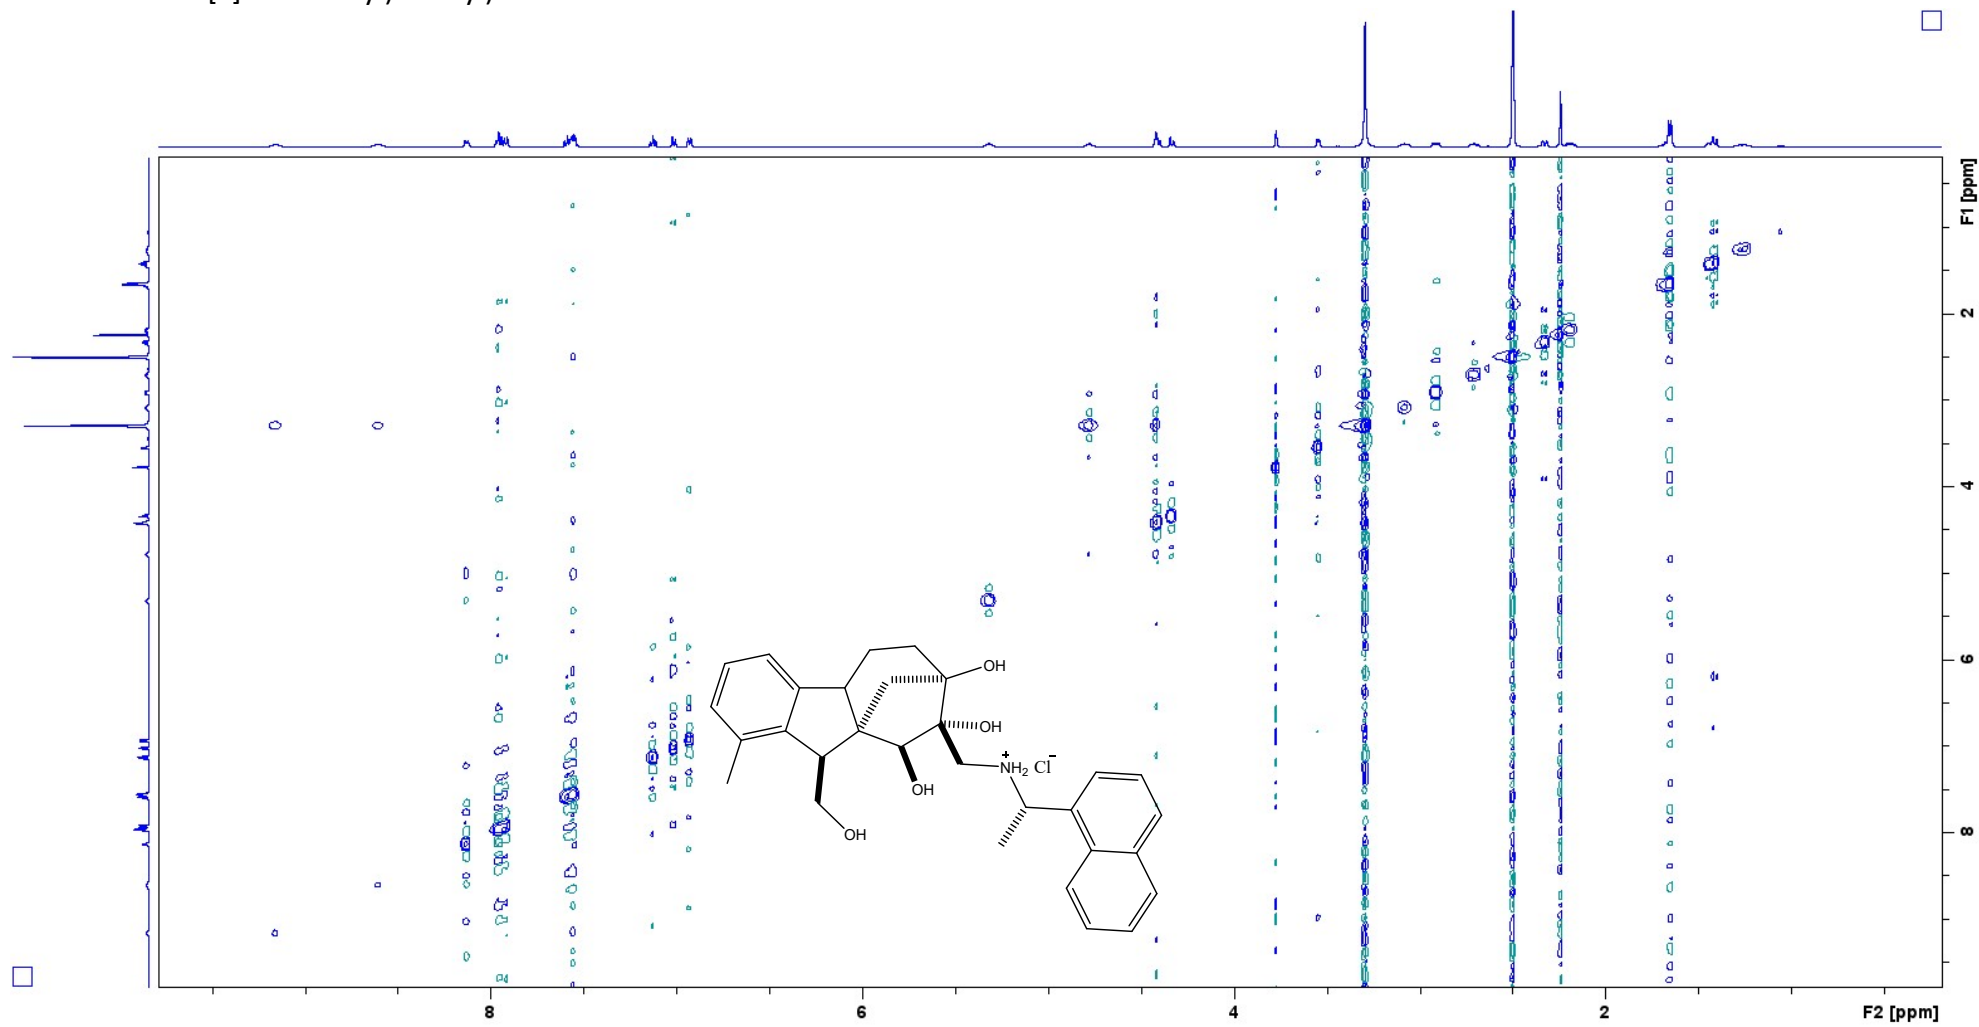

HSQC of (1S)-1-(Naphthalen-1-yl)-N-(((7S,8R,9S,9aR,10S)-7,8,9-trihydroxy-10-(hydroxymethyl)-1-methyl-4b,6,7,8,9,10-hexahydro-5H-7,9a-methanobenzo[a]azulen-8-yl)methyl)ethan-1-aminium chloride **25**

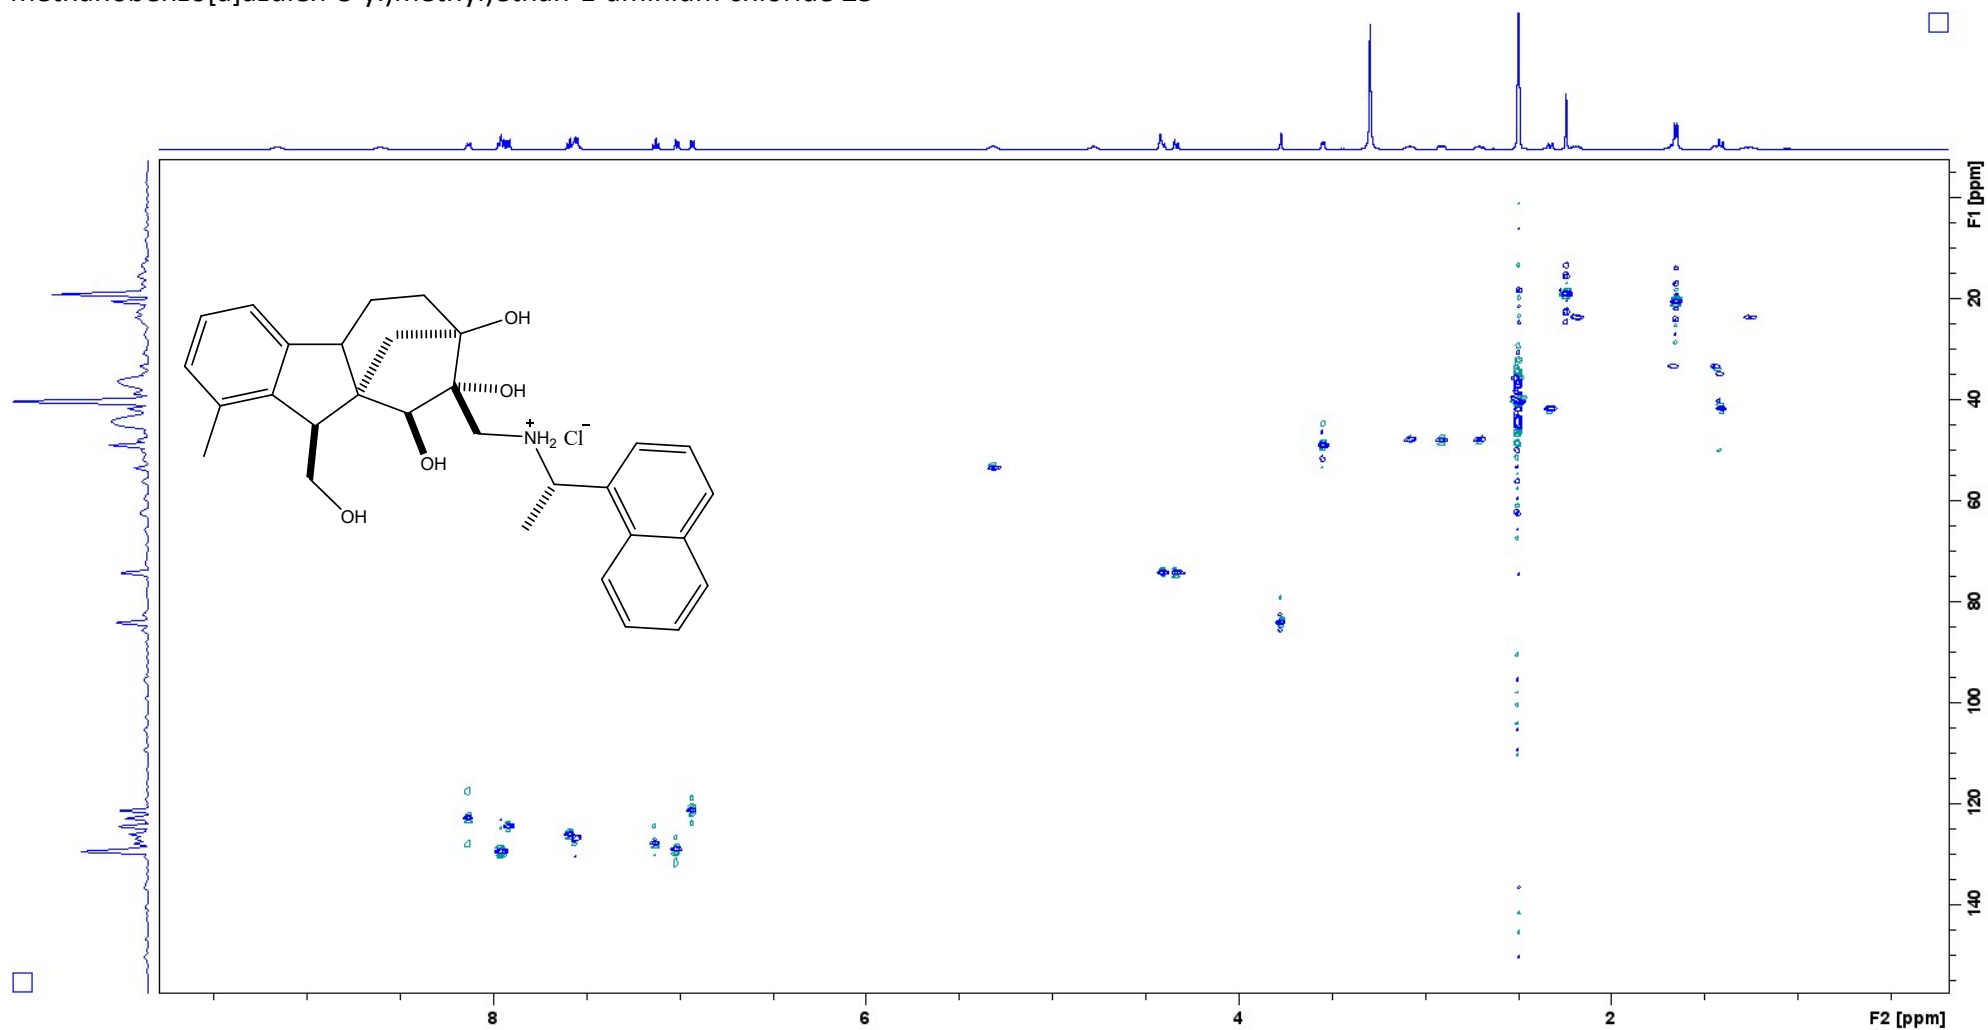

HMBC of (1S)-1-(Naphthalen-1-yl)-N-(((7S,8R,9S,9aR,10S)-7,8,9-trihydroxy-10-(hydroxymethyl)-1-methyl-4b,6,7,8,9,10-hexahydro-5H-7,9a-methanobenzo[a]azulen-8-yl)methyl)ethan-1-aminium chloride **25**

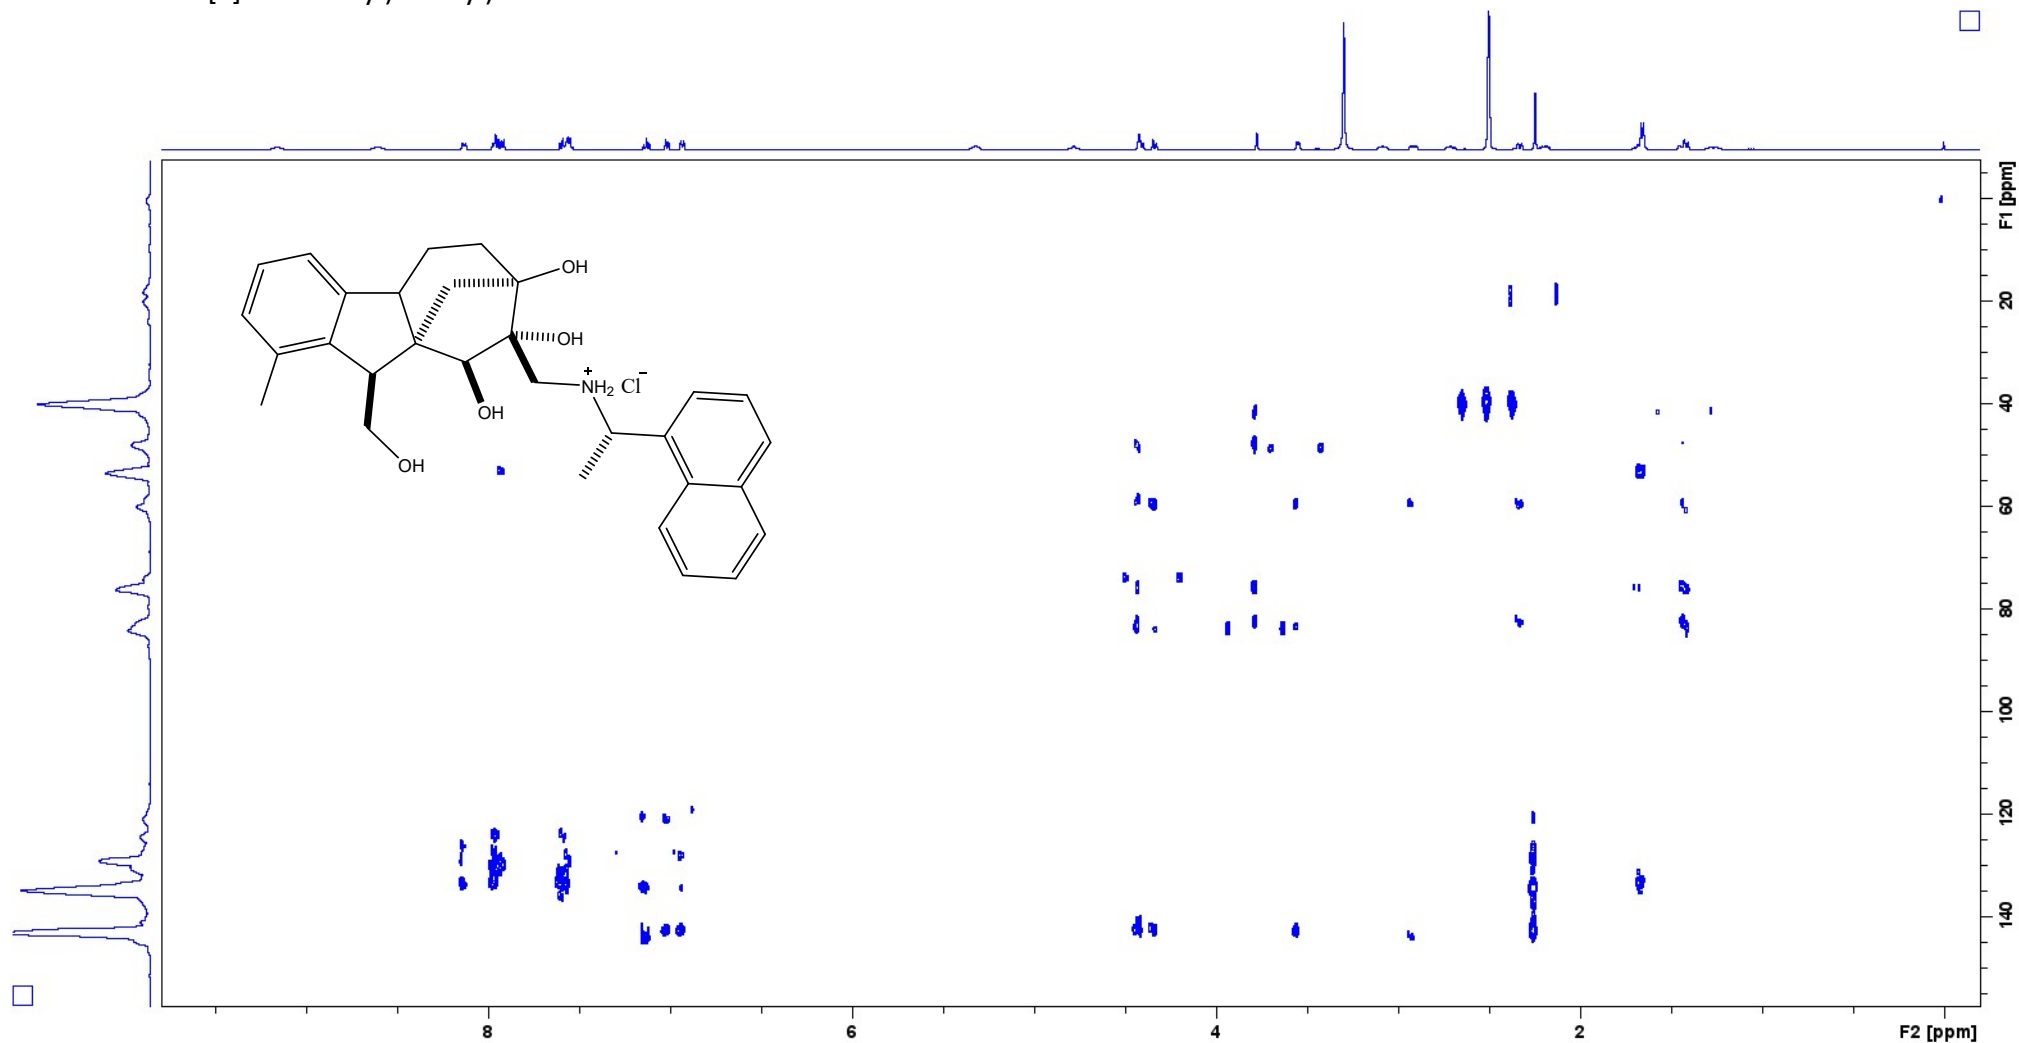

$^1\text{H-NMR}$  (500 MHz) of (1*R*)-1-(Naphthalen-1-yl)-*N*-(((7*S*,8*R*,9*S*,9*aR*,10*S*)-7,8,9-trihydroxy-10-(hydroxymethyl)-1-methyl-4b,6,7,8,9,10-hexahydro-5*H*-7,9a-methanobenzo[*a*]azulen-8-yl)methyl)ethan-1-aminium chloride **26**

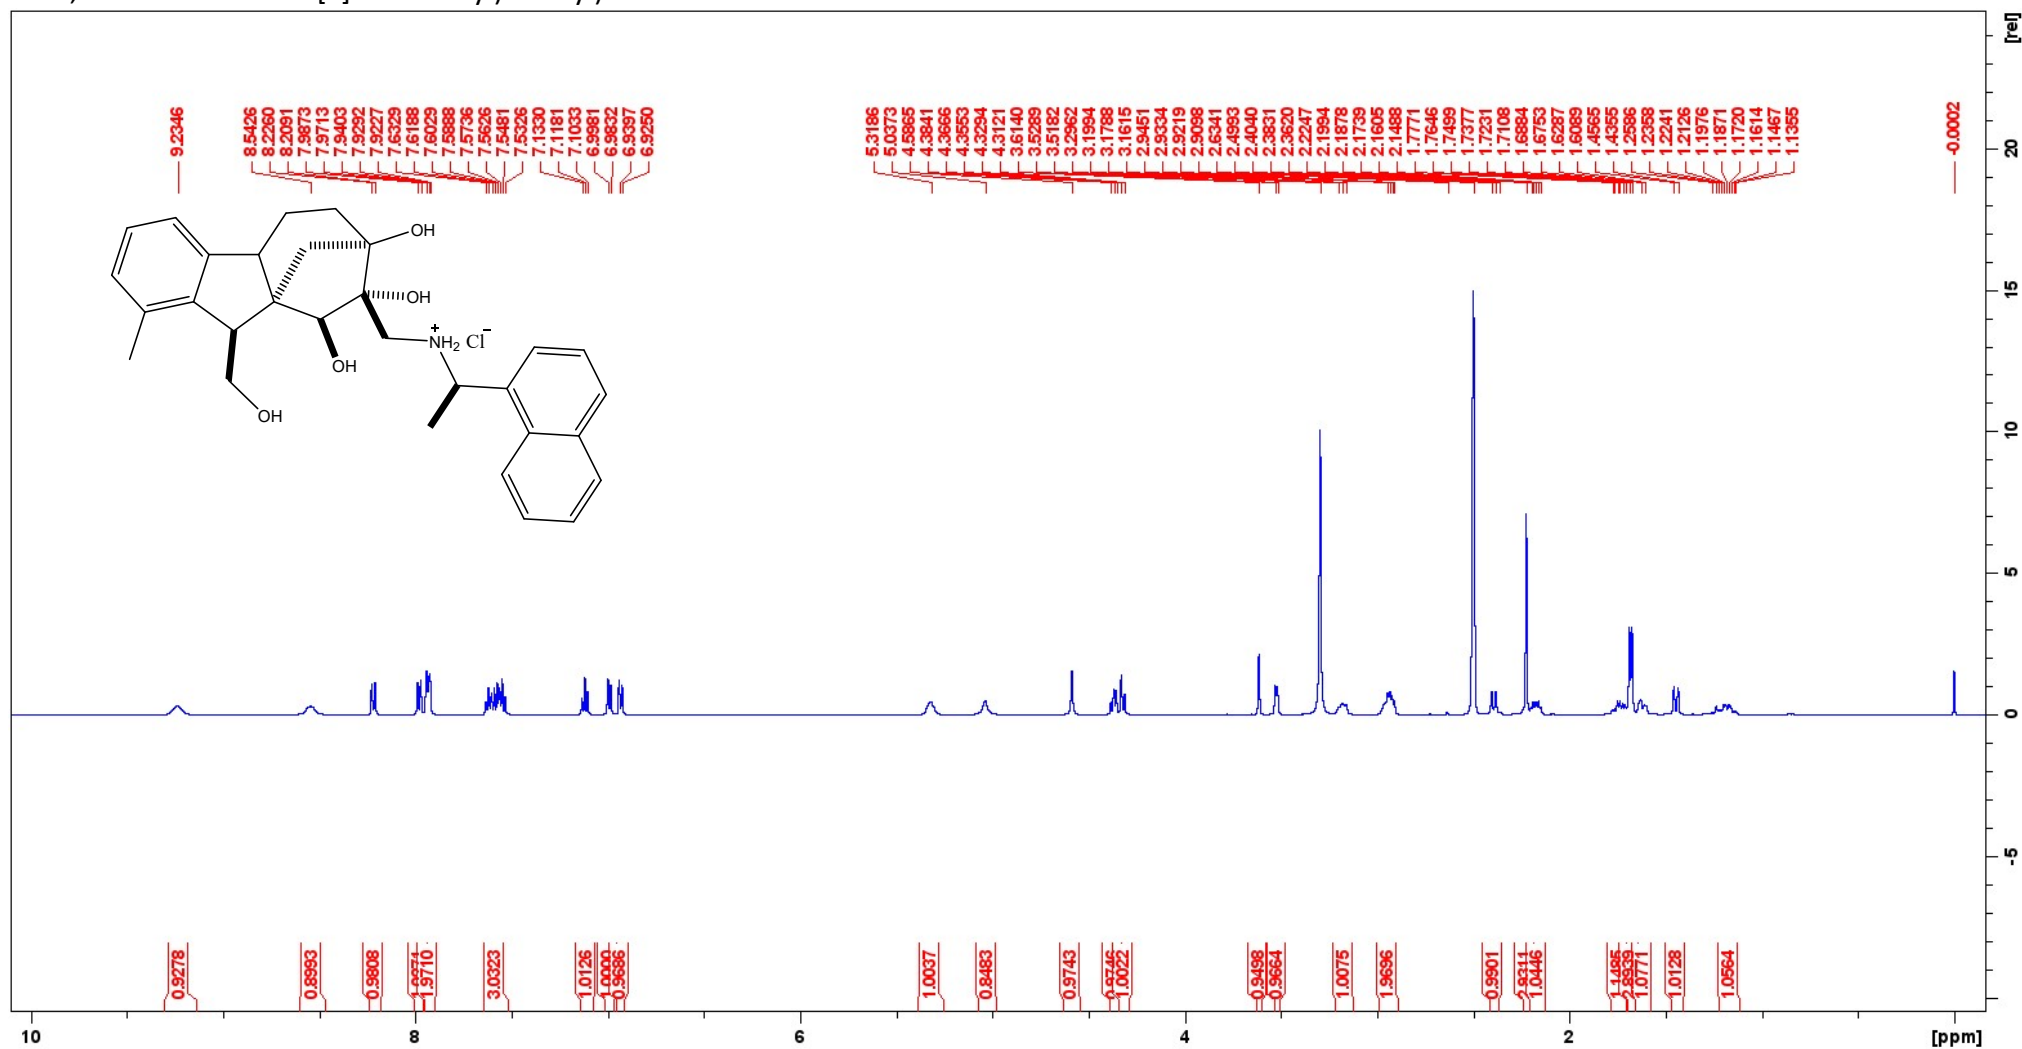

$^{13}\text{C}\{^1\text{H}\}$  J-MOD NMR (125 MHz) of (1*R*)-1-(Naphthalen-1-yl)-*N*-(((7*S*,8*R*,9*S*,9*aR*,10*S*)-7,8,9-trihydroxy-10-(hydroxymethyl)-1-methyl-4*b*,6,7,8,9,10-hexahydro-5*H*-7,9*a*-methanobenzo[*a*]azulen-8-yl)methyl)ethan-1-aminium chloride **26**

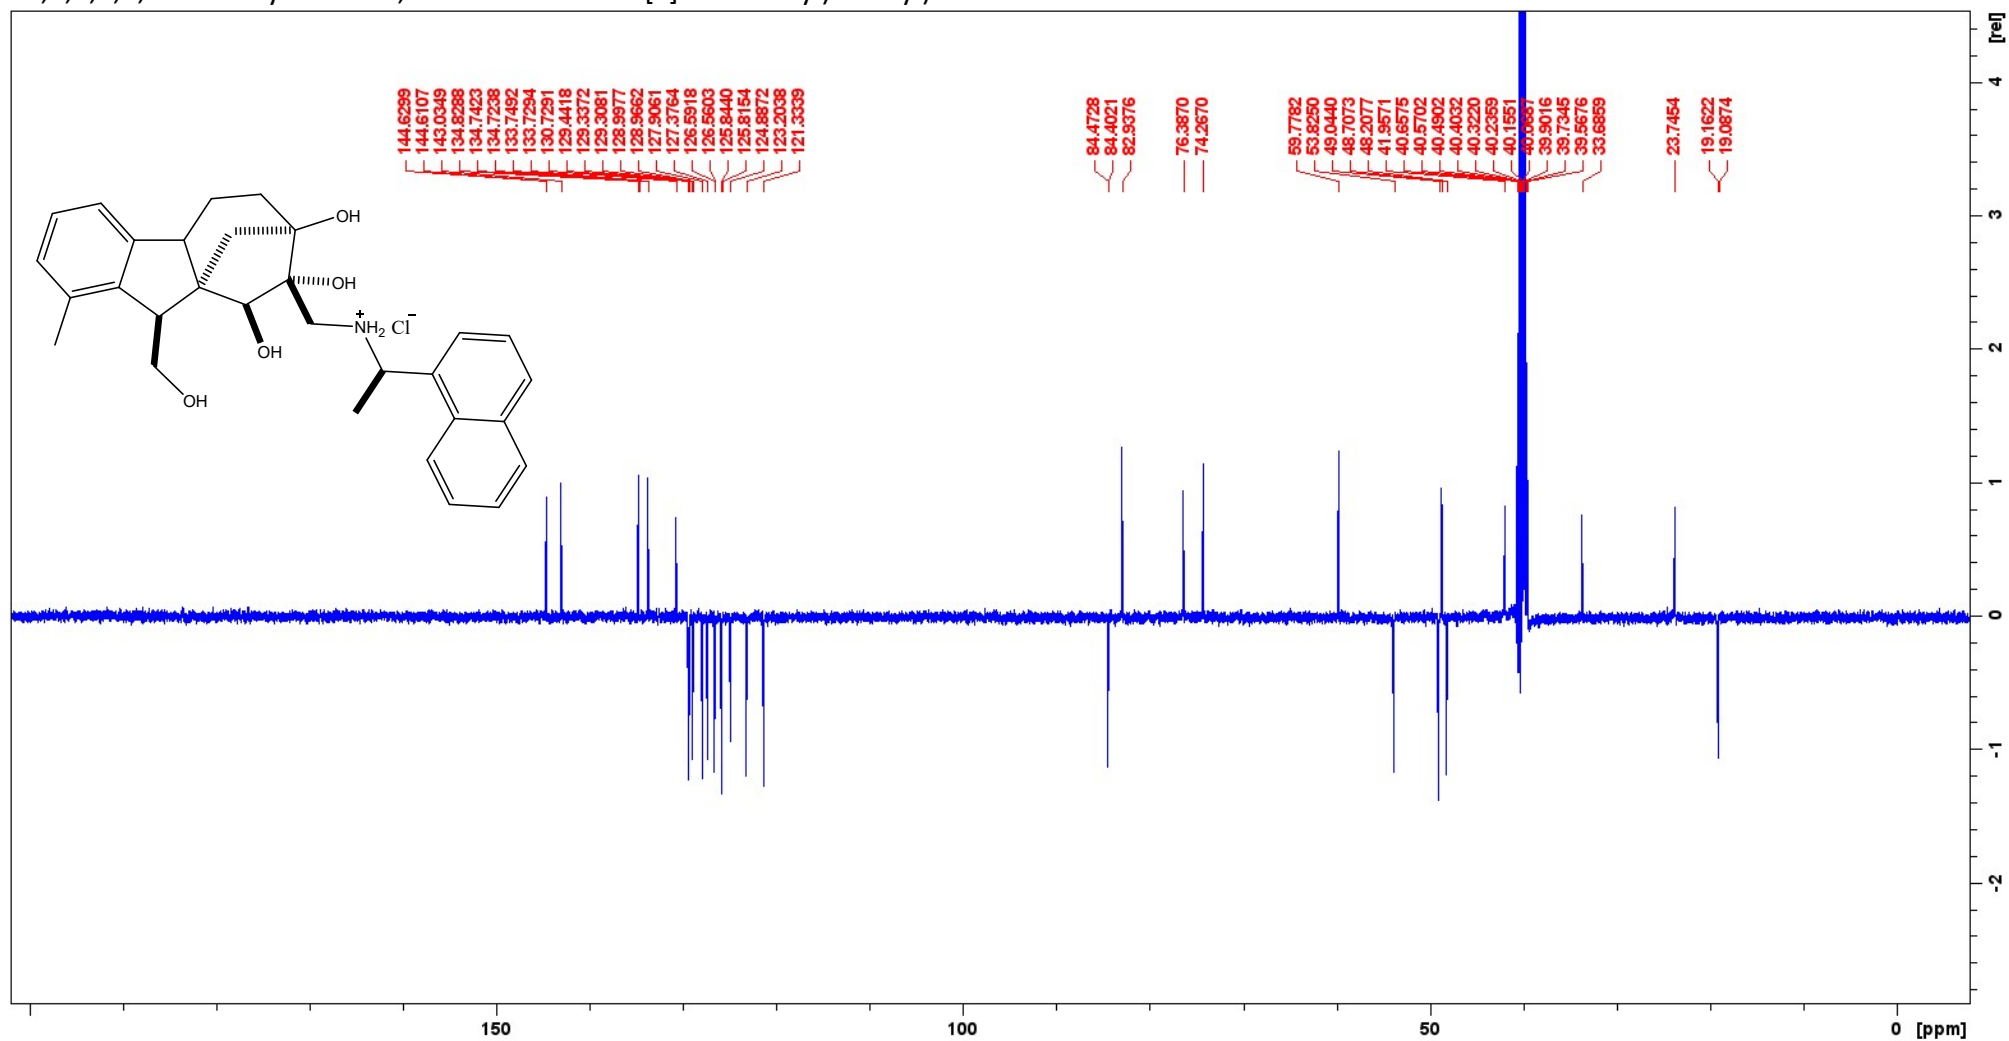

COSY of (1*R*)-1-(Naphthalen-1-yl)-*N*-(((7*S*,8*R*,9*S*,9*aR*,10*S*)-7,8,9-trihydroxy-10-(hydroxymethyl)-1-methyl-4*b*,6,7,8,9,10-hexahydro-5*H*-7,9*a*-methanobenzo[*a*]azulen-8-yl)methyl)ethan-1-aminium chloride **26**

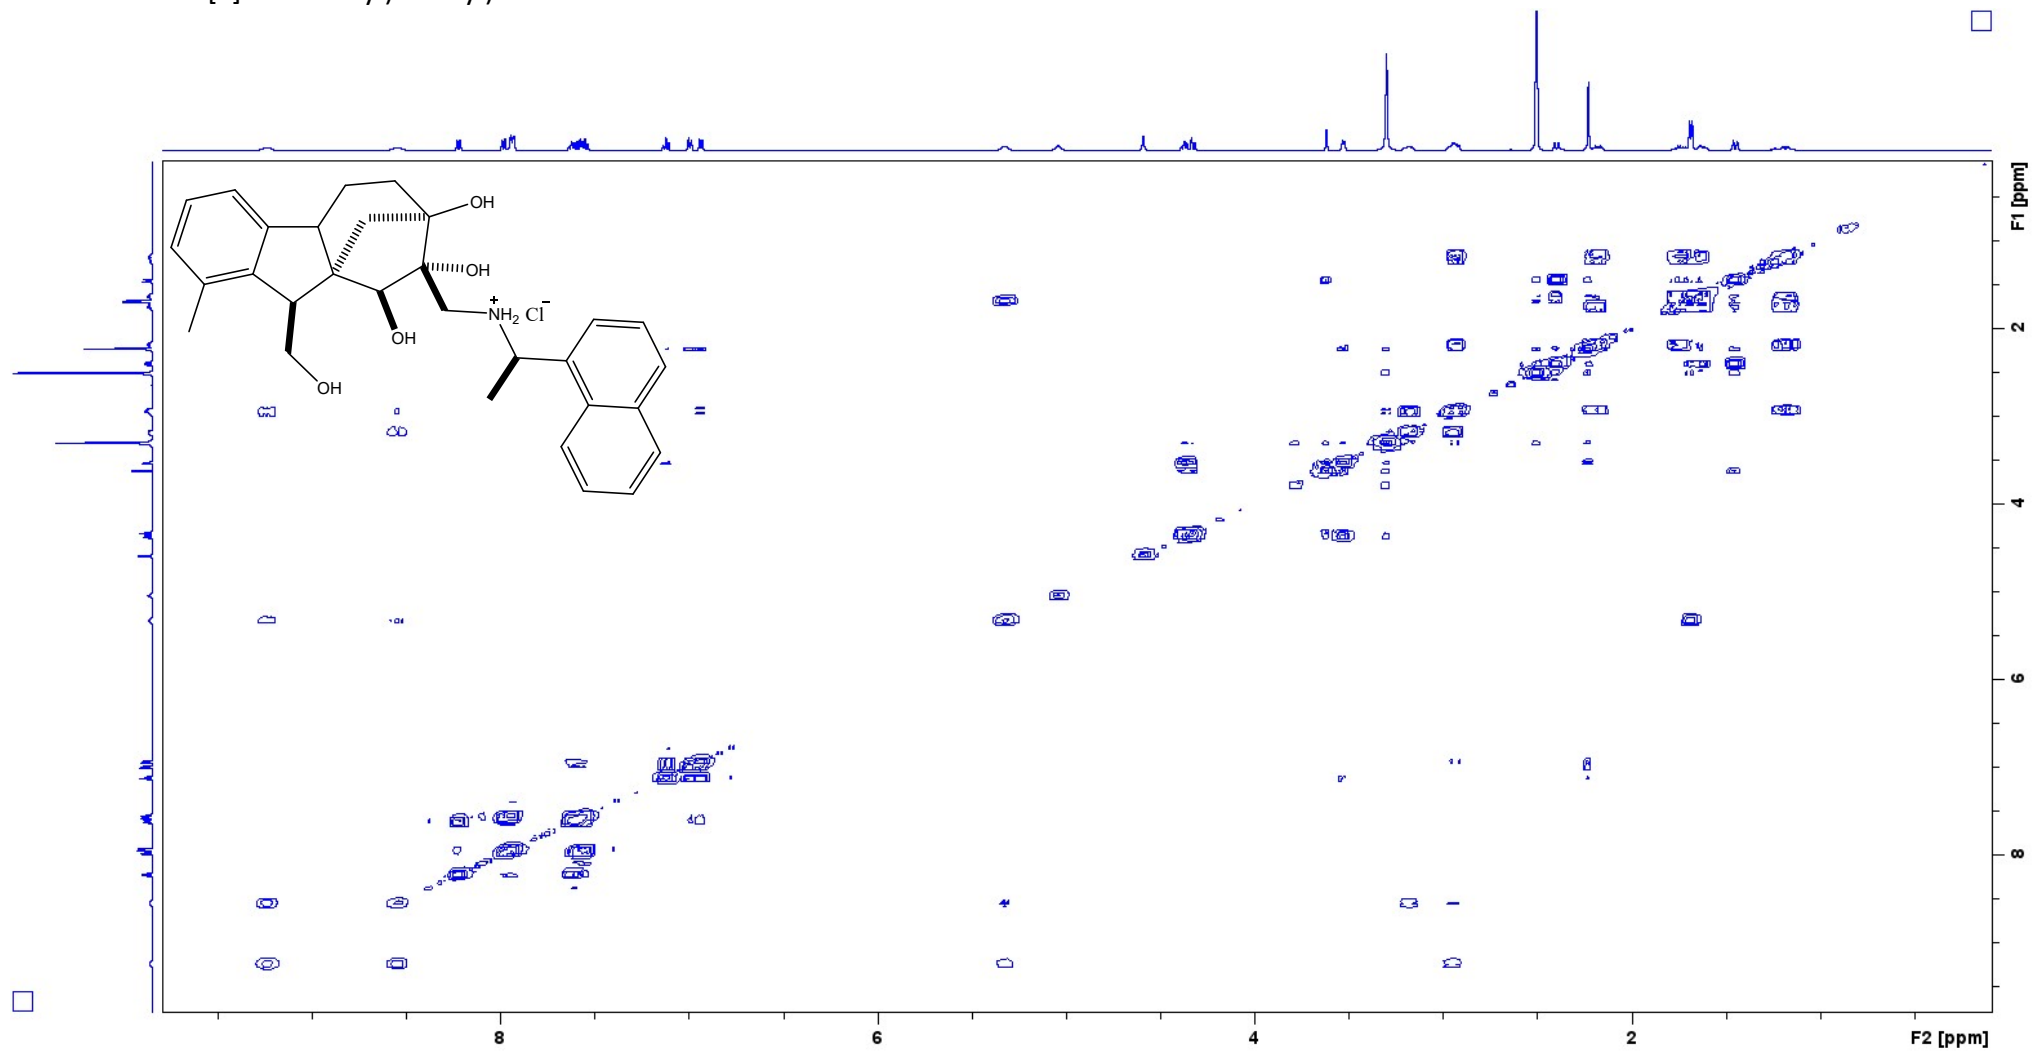

NOESY of (1*R*)-1-(Naphthalen-1-yl)-*N*-(((7*S*,8*R*,9*S*,9*aR*,10*S*)-7,8,9-trihydroxy-10-(hydroxymethyl)-1-methyl-4*b*,6,7,8,9,10-hexahydro-5*H*-7,9a-methanobenzo[*a*]azulen-8-yl)methyl)ethan-1-aminium chloride **26**

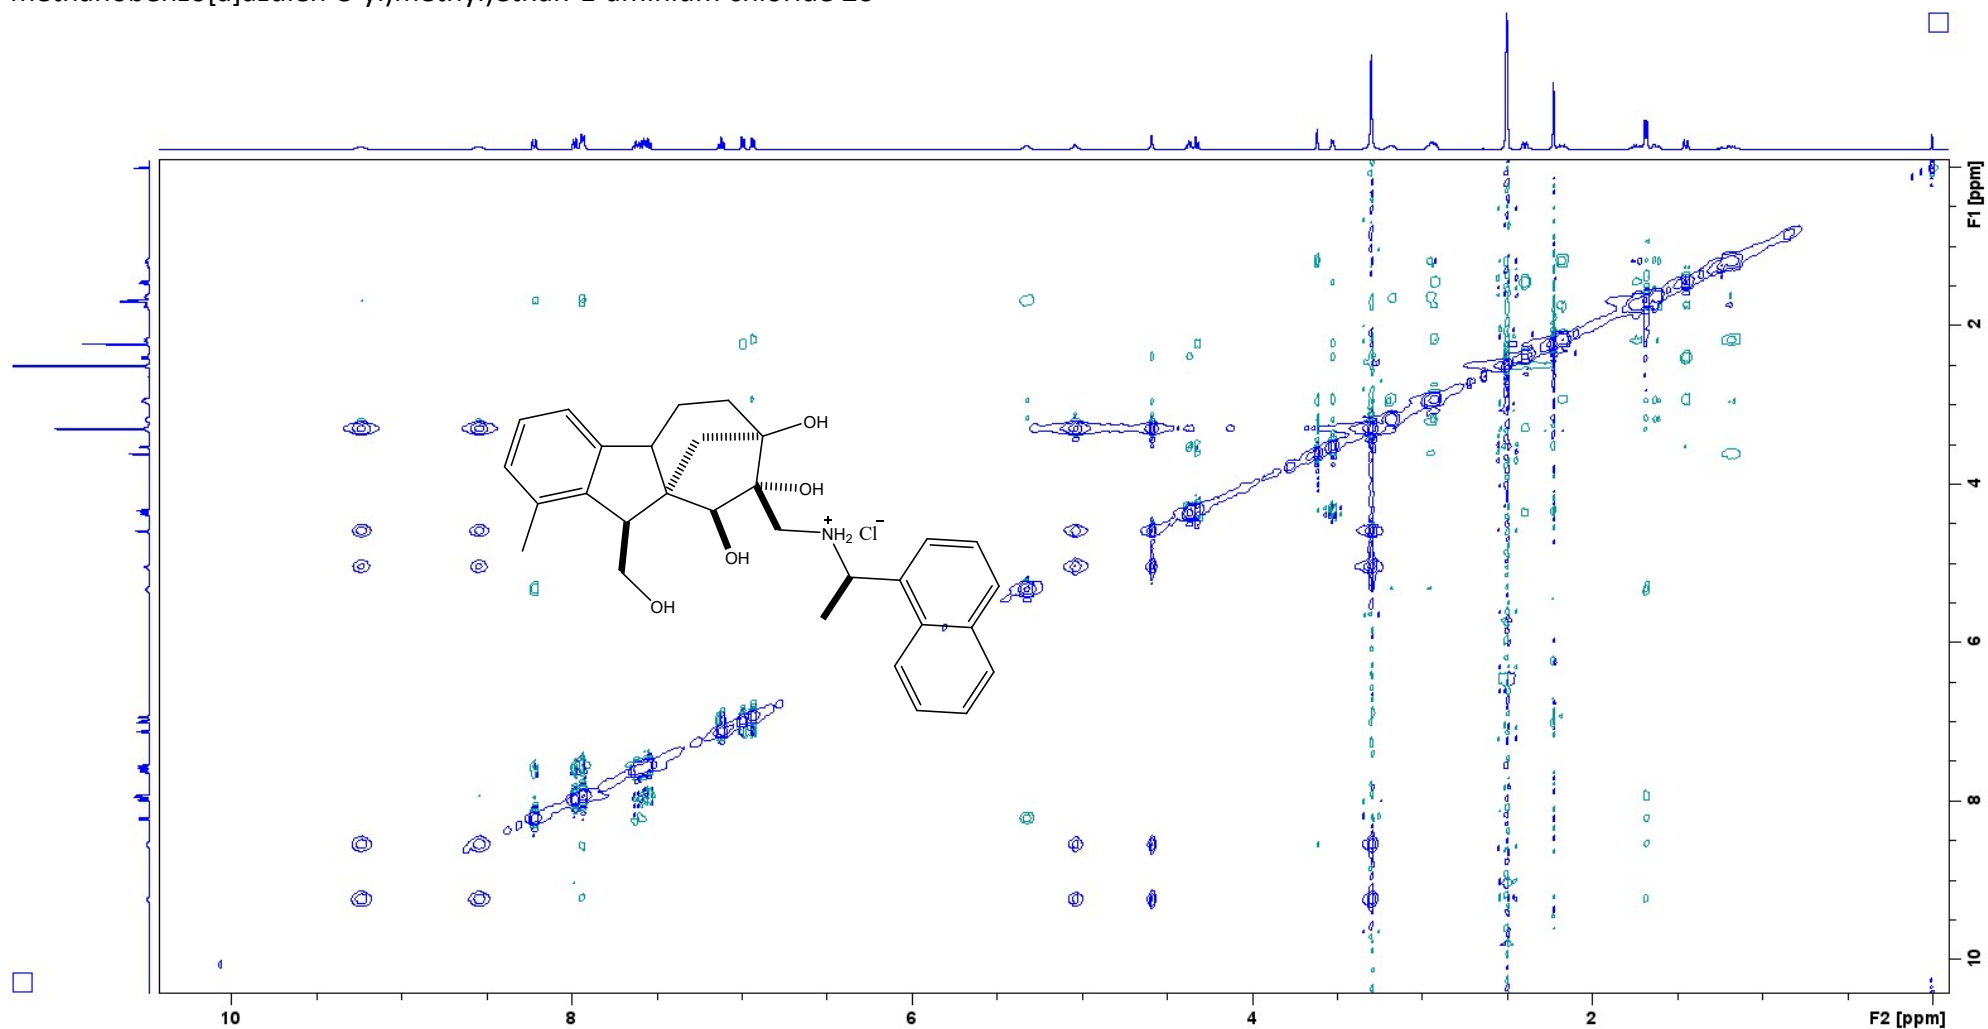

HSQC of (1*R*)-1-(Naphthalen-1-yl)-*N*-(((7*S*,8*R*,9*S*,9*aR*,10*S*)-7,8,9-trihydroxy-10-(hydroxymethyl)-1-methyl-4*b*,6,7,8,9,10-hexahydro-5*H*-7,9a-methanobenzo[*a*]azulen-8-yl)methyl)ethan-1-aminium chloride **26**

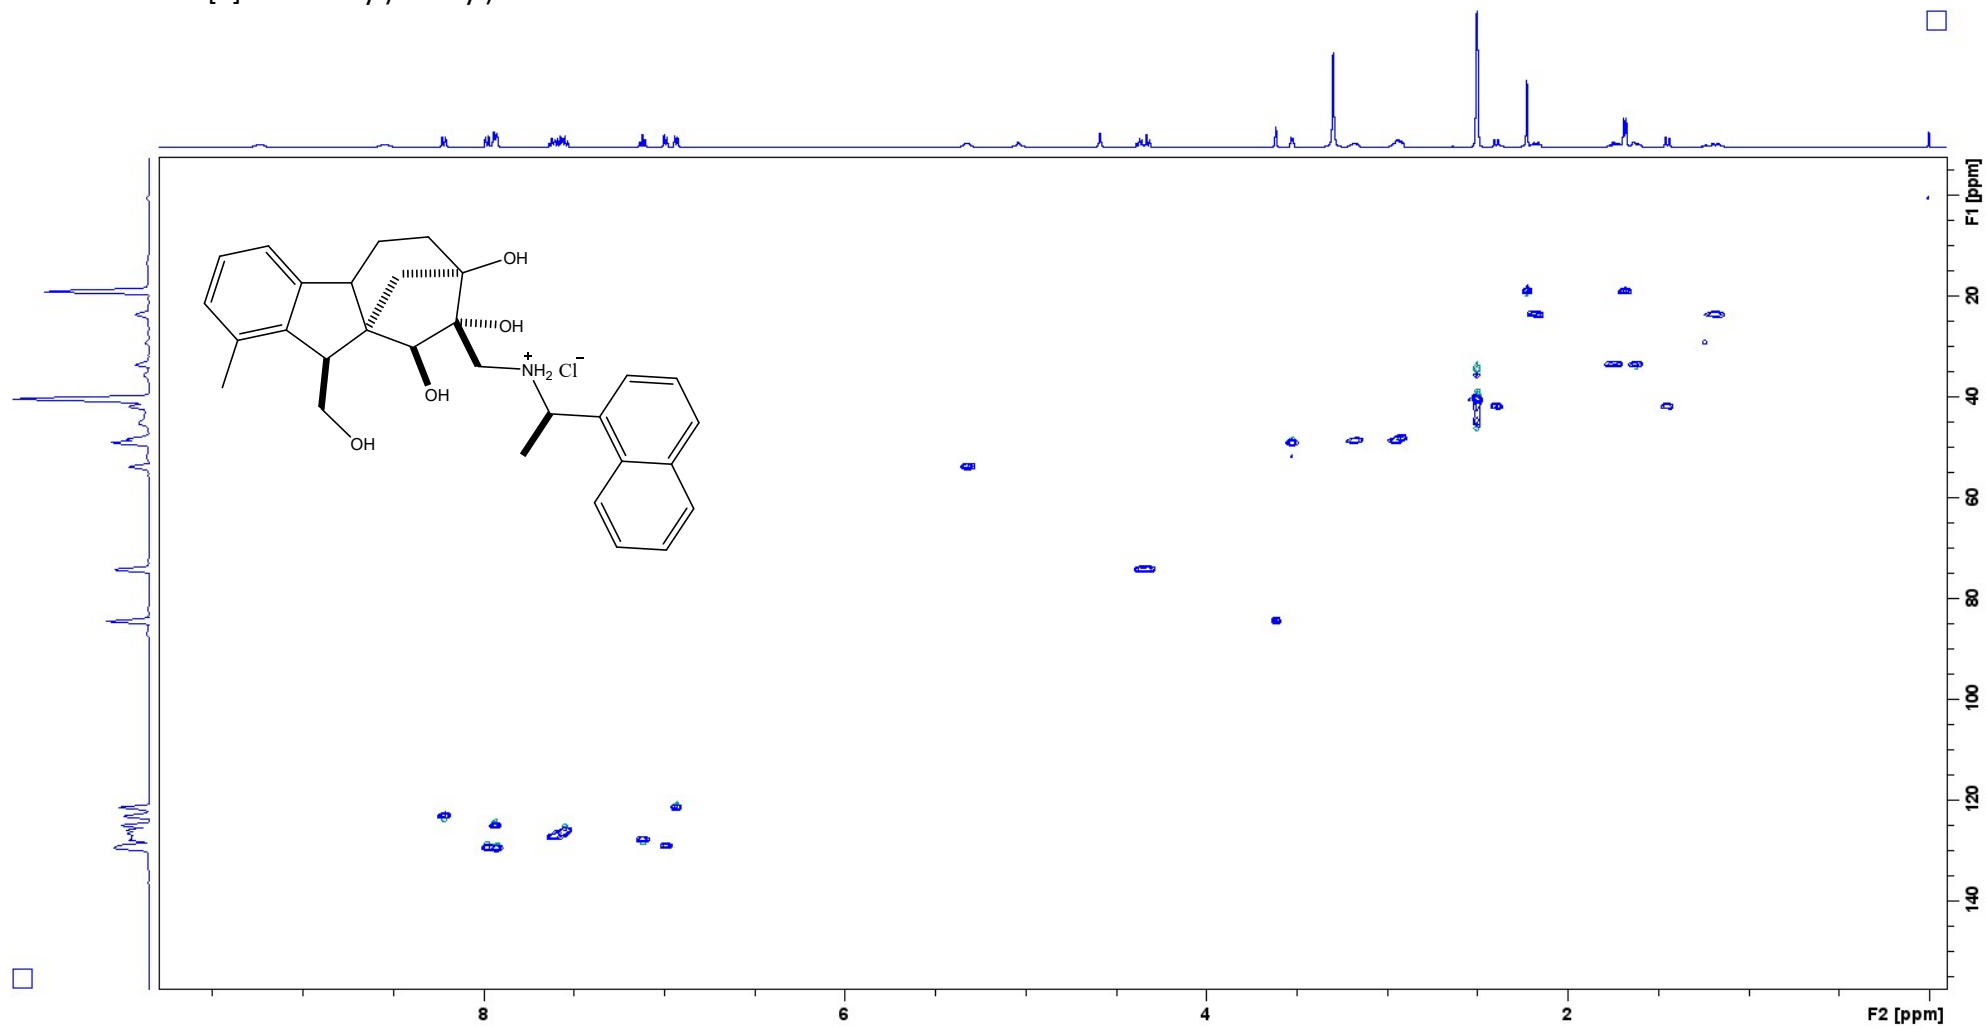



HMBC of (1*R*)-1-(Naphthalen-1-yl)-*N*-(((7*S*,8*R*,9*S*,9*aR*,10*S*)-7,8,9-trihydroxy-10-(hydroxymethyl)-1-methyl-4*b*,6,7,8,9,10-hexahydro-5*H*-7,9*a*-methanobenzo[*a*]azulen-8-yl)methyl)ethan-1-aminium chloride **26**

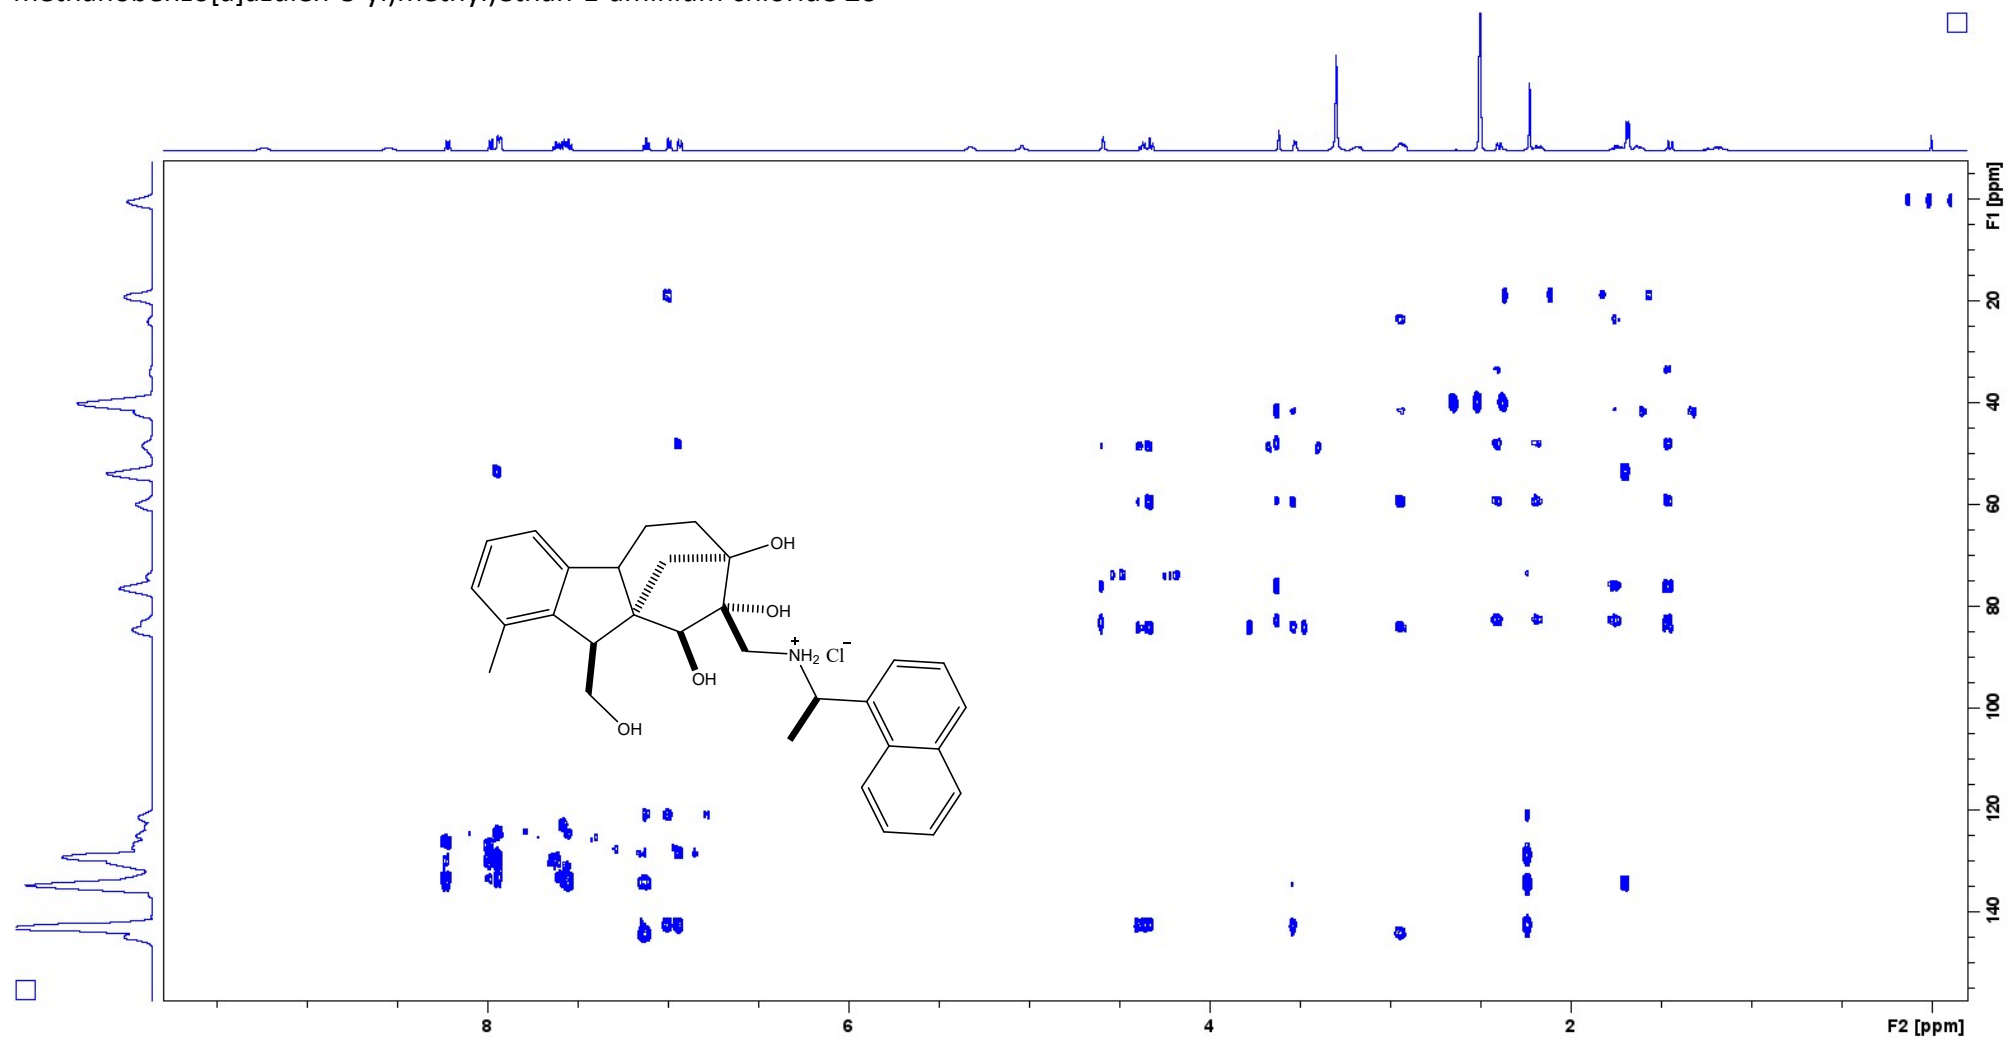

<sup>1</sup>H-NMR (500 MHz) of 3-(1*H*-imidazol-1-yl)-*N*-(((7*S*,8*R*,9*S*,9*aR*,10*S*)-7,8,9-trihydroxy-10-(hydroxymethyl)-1-methyl-4*b*,6,7,8,9,10-hexahydro-5*H*-7,9*a*-methanobenzo[*a*]azulen-8-yl)methyl)propan-1-aminium chloride **27**

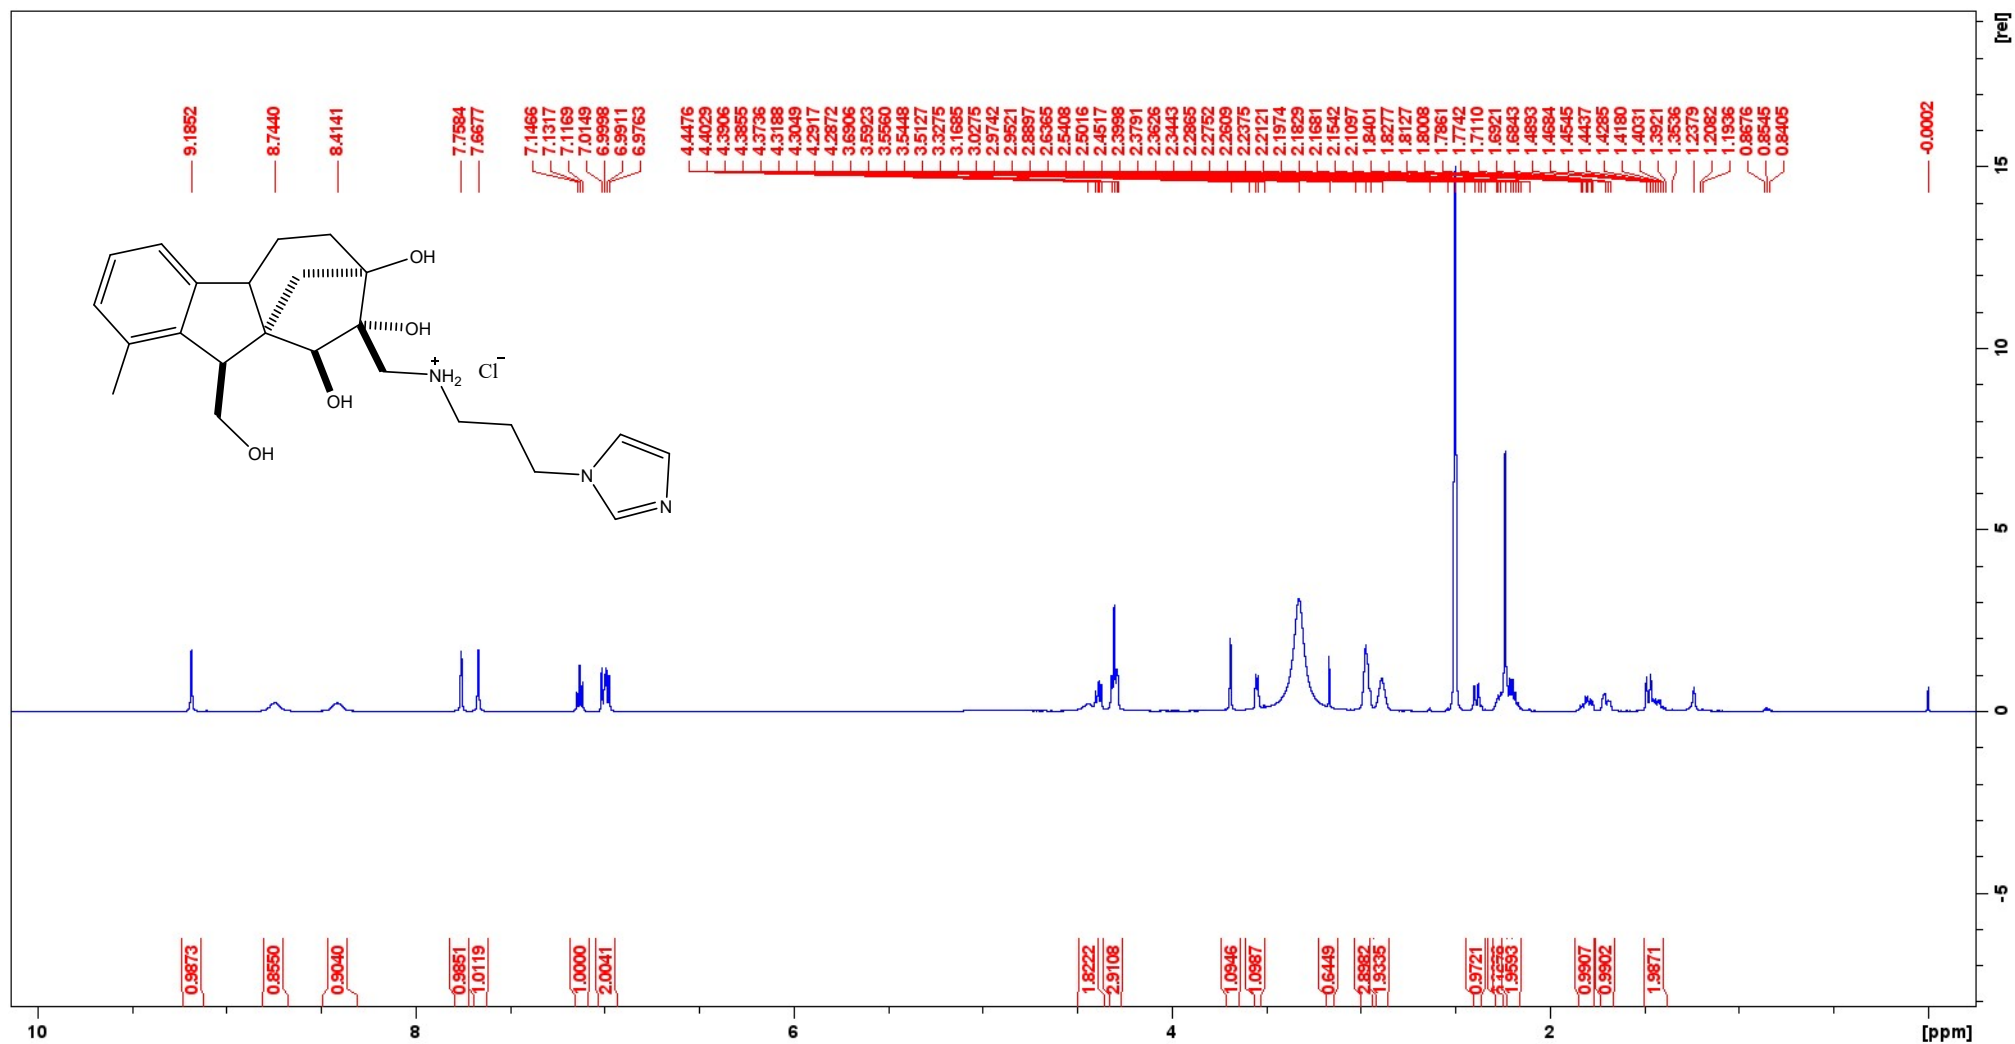

$^{13}\text{C}\{^1\text{H}\}$  J-MOD NMR (125 MHz) of 3-(1*H*-imidazol-1-yl)-*N*-(((7*S*,8*R*,9*S*,9*aR*,10*S*)-7,8,9-trihydroxy-10-(hydroxymethyl)-1-methyl-4*b*,6,7,8,9,10-hexahydro-5*H*-7,9*a*-methanobenzo[*a*]azulen-8-yl)methyl)propan-1-aminium chloride **27**

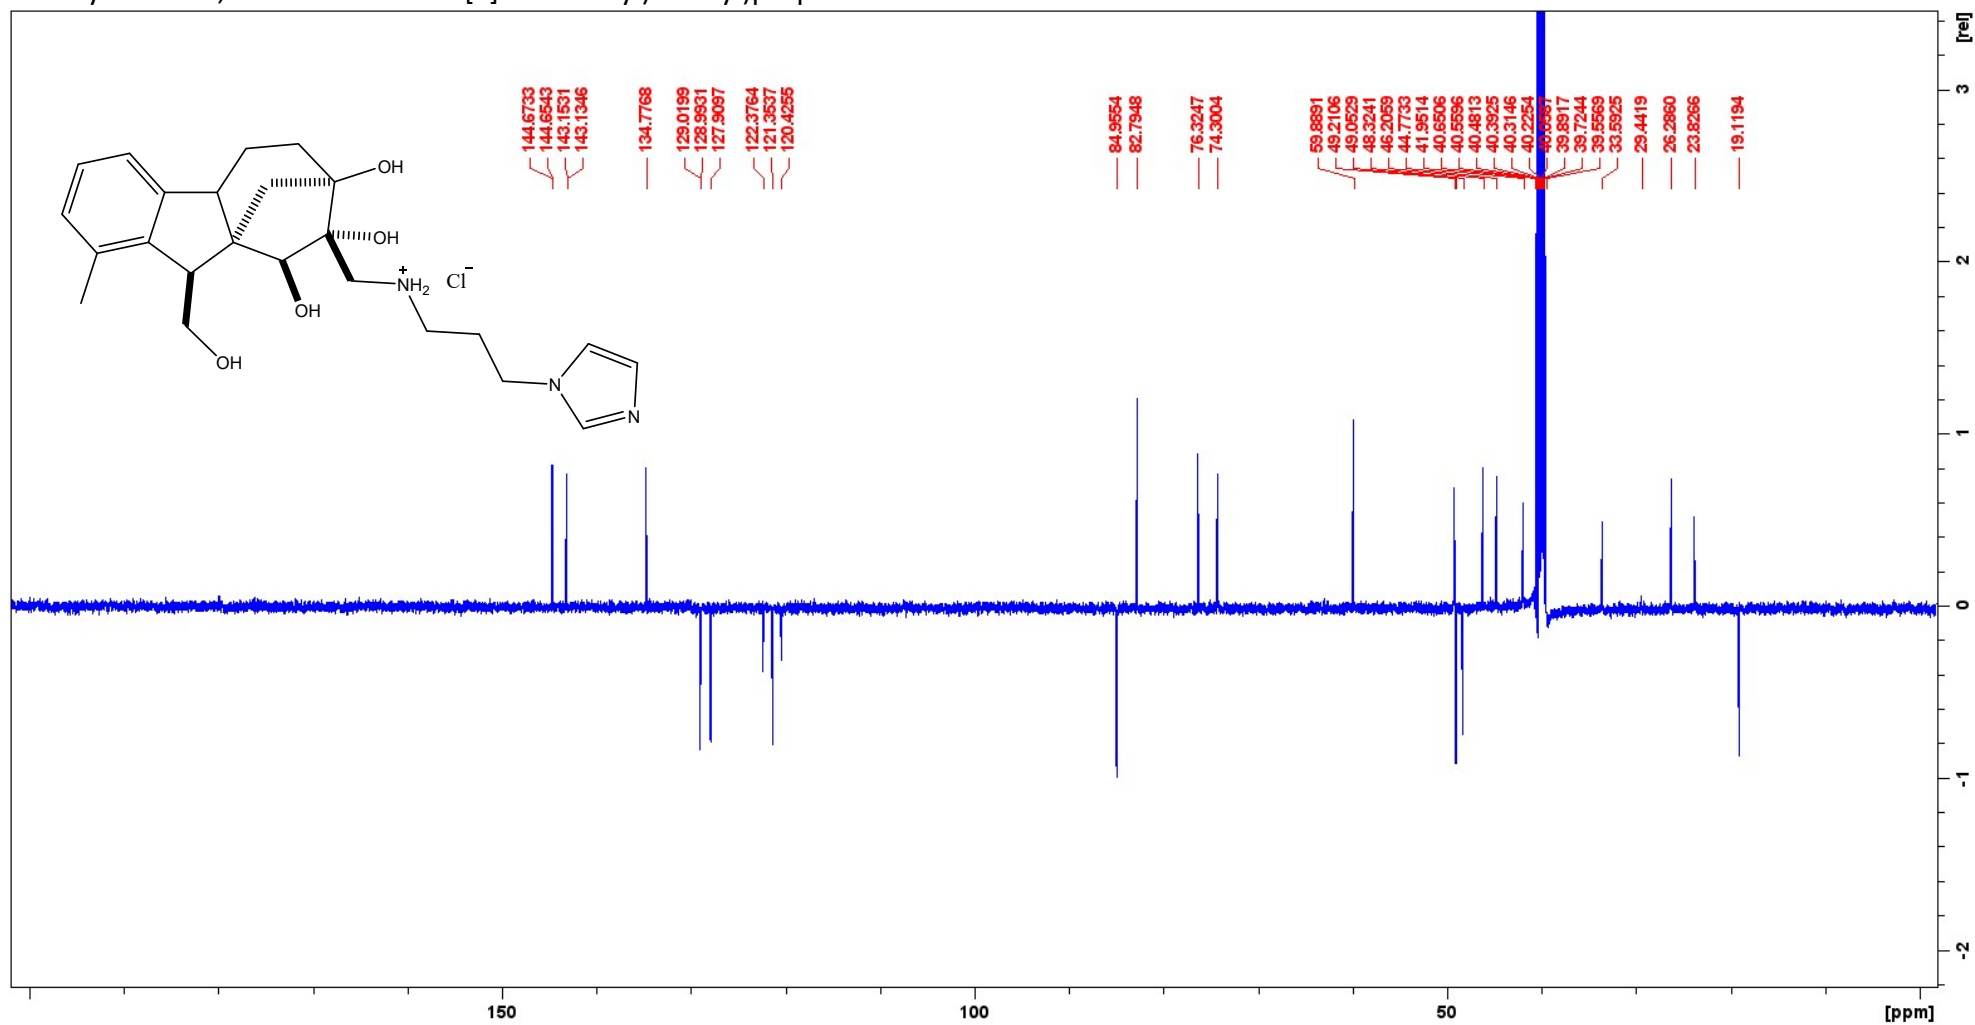

COSY of 3-(1*H*-imidazol-1-yl)-*N*-(((7*S*,8*R*,9*S*,9*aR*,10*S*)-7,8,9-trihydroxy-10-(hydroxymethyl)-1-methyl-4*b*,6,7,8,9,10-hexahydro-5*H*-7,9a-methanobenzo[*a*]azulen-8-yl)methyl)propan-1-aminium chloride **27**

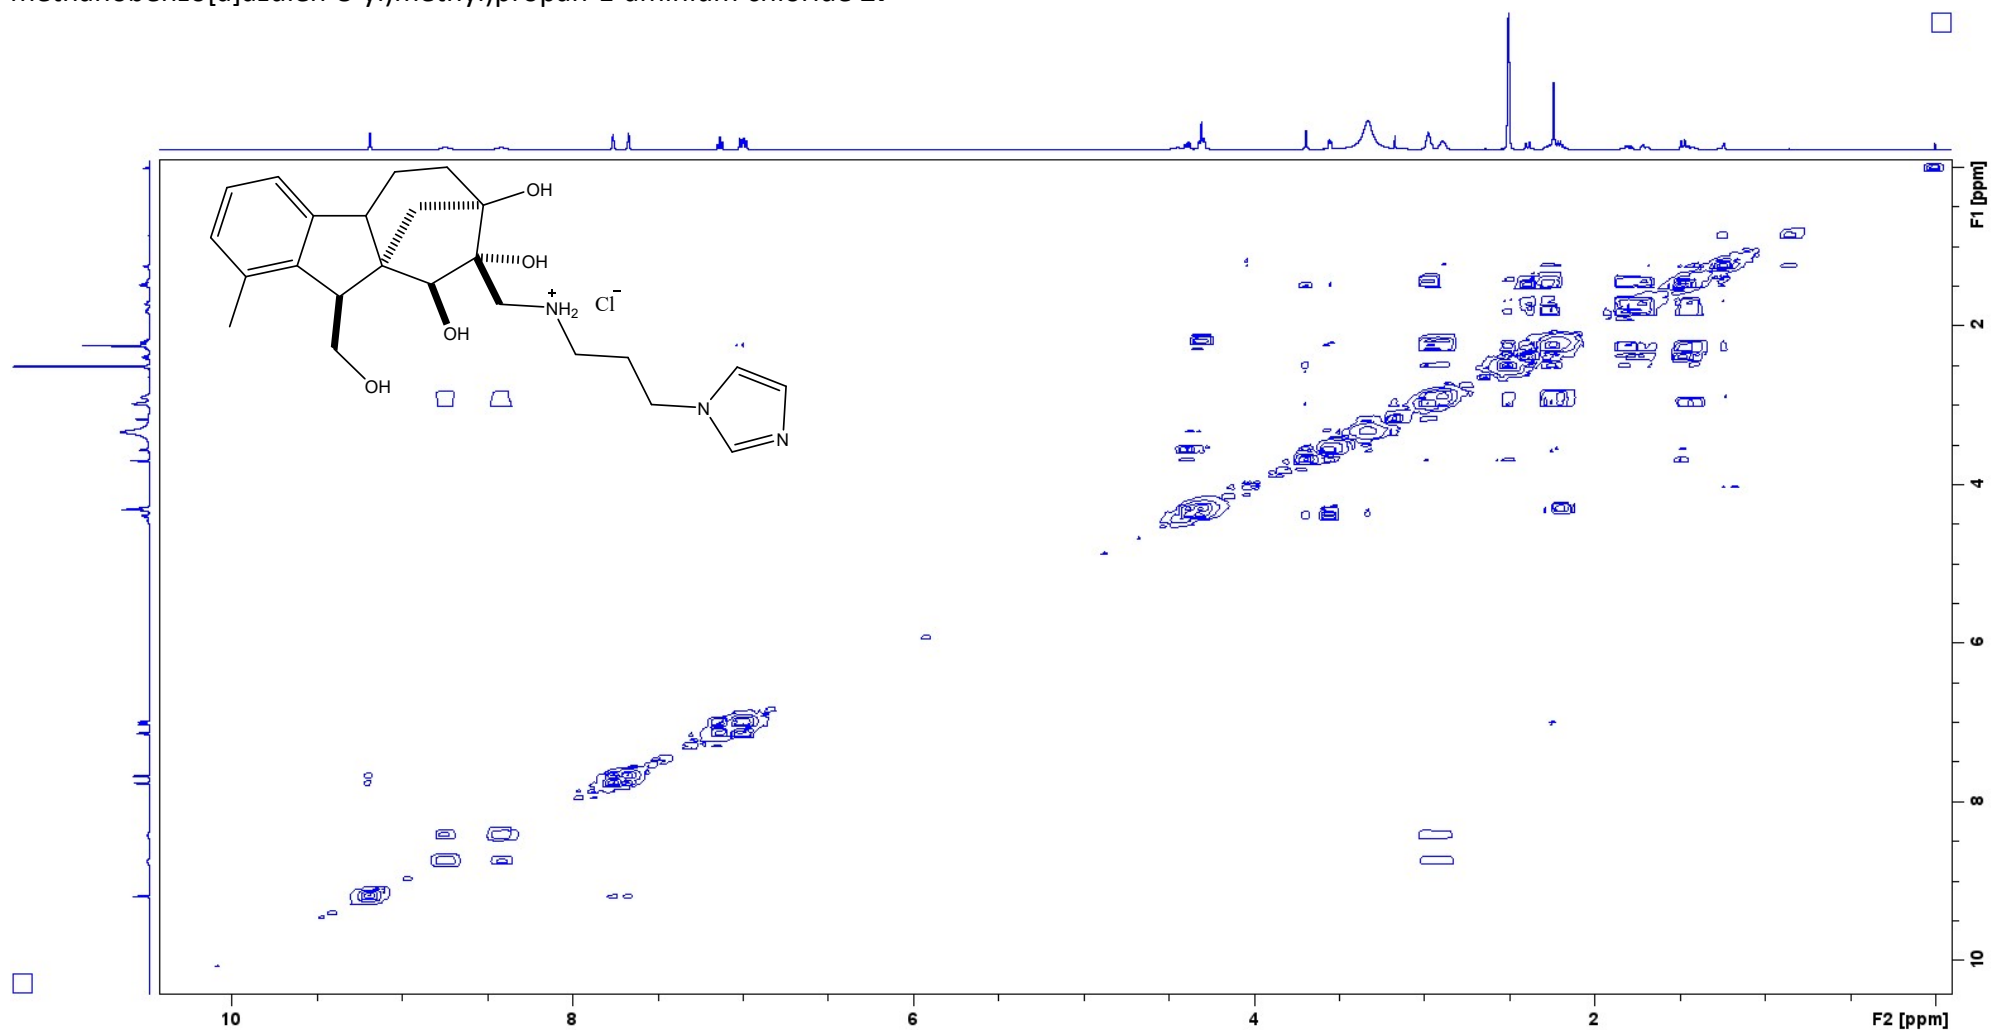

NOESY of 3-(1*H*-imidazol-1-yl)-*N*-(((7*S*,8*R*,9*S*,9*aR*,10*S*)-7,8,9-trihydroxy-10-(hydroxymethyl)-1-methyl-4*b*,6,7,8,9,10-hexahydro-5*H*-7,9*a*-methanobenzo[*a*]azulen-8-yl)methyl)propan-1-aminium chloride **27**

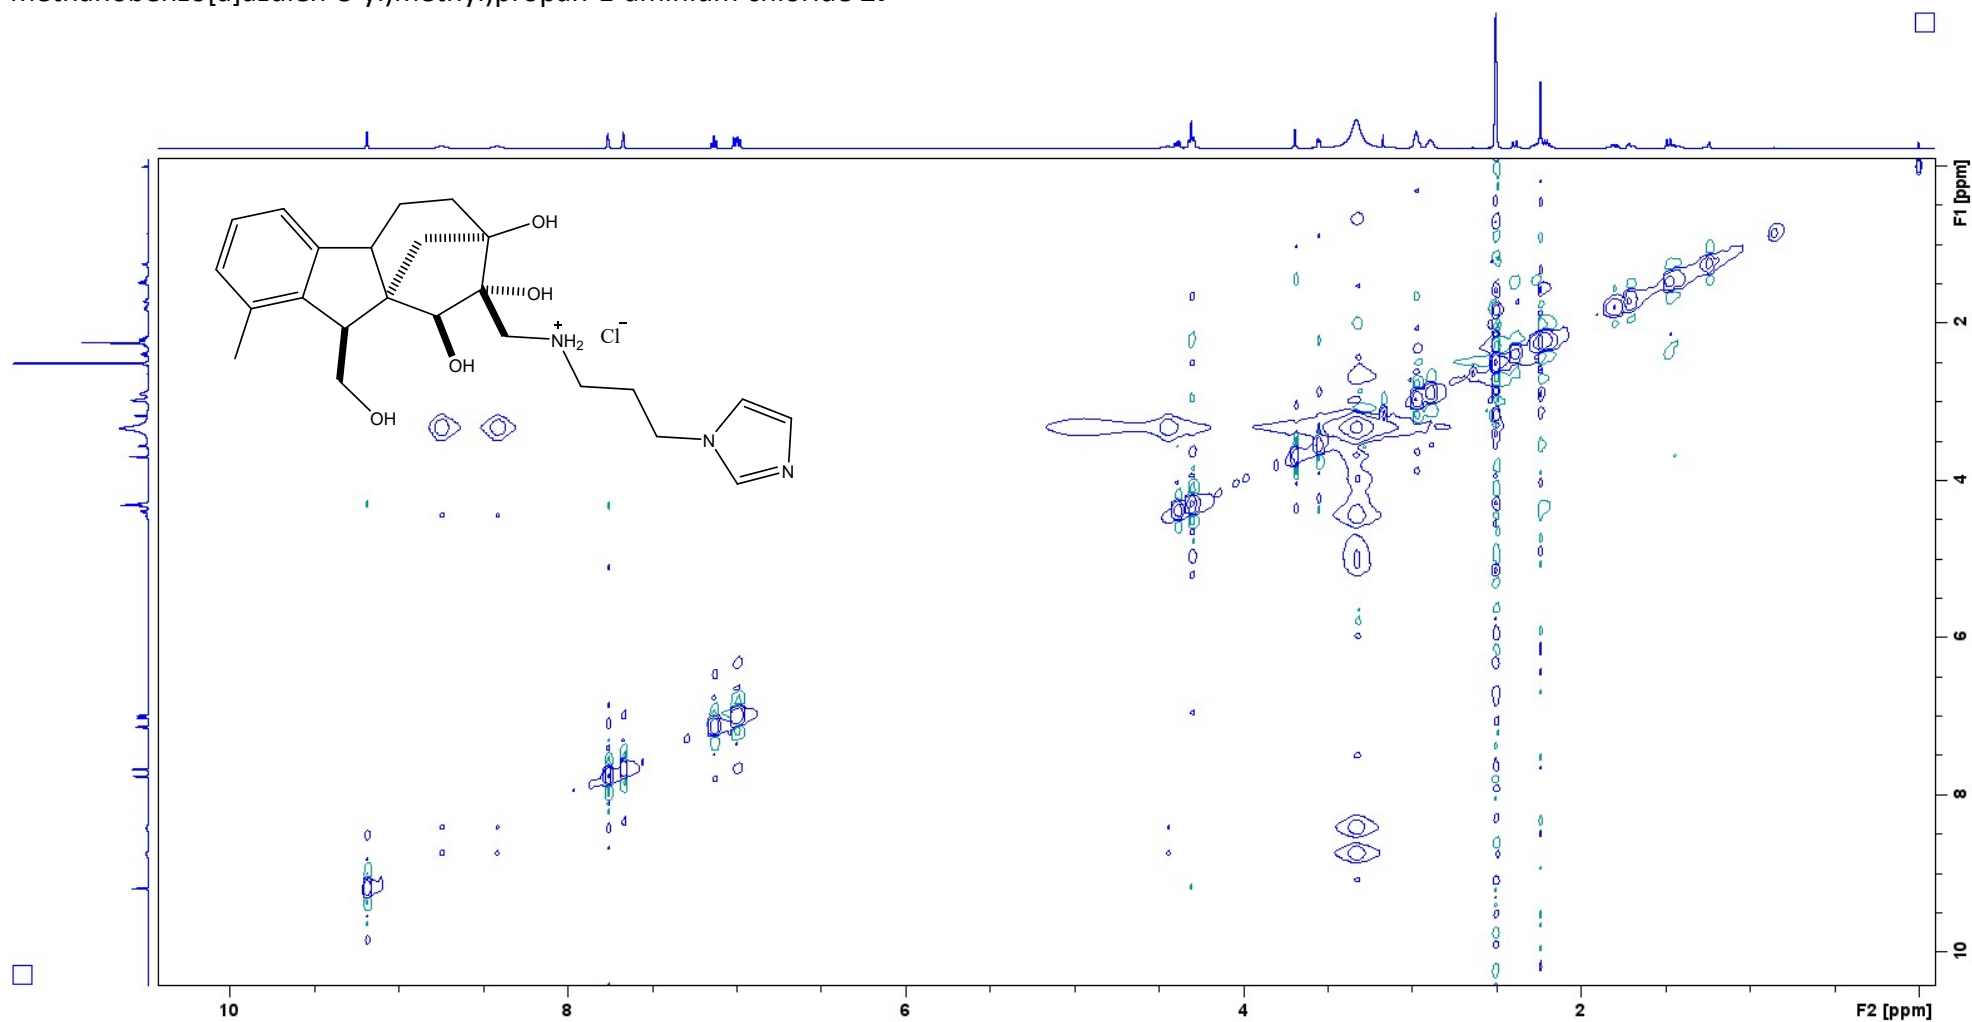

HSQC of 3-(1*H*-imidazol-1-yl)-*N*-(((7*S*,8*R*,9*S*,9*aR*,10*S*)-7,8,9-trihydroxy-10-(hydroxymethyl)-1-methyl-4*b*,6,7,8,9,10-hexahydro-5*H*-7,9a-methanobenzo[*a*]azulen-8-yl)methyl)propan-1-aminium chloride **27**

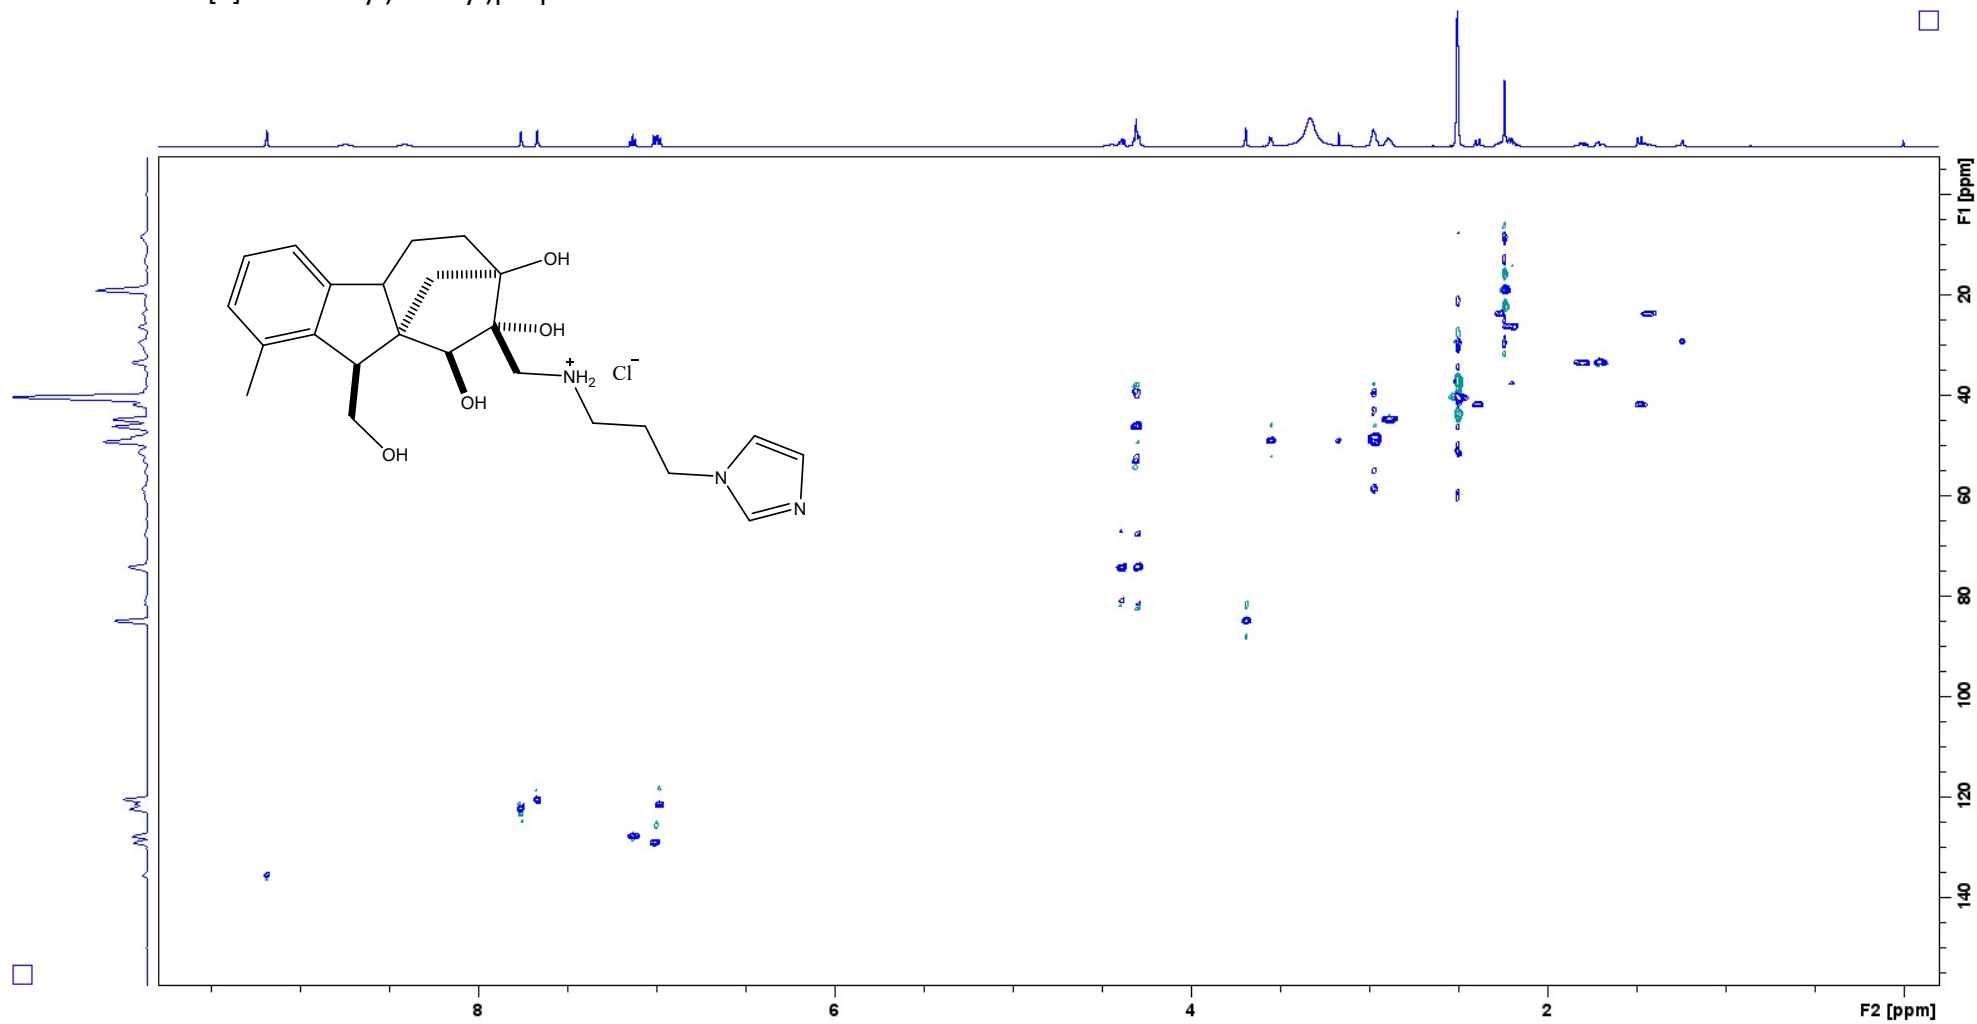

HMBC of 3-(1*H*-imidazol-1-yl)-*N*-(((7*S*,8*R*,9*S*,9*aR*,10*S*)-7,8,9-trihydroxy-10-(hydroxymethyl)-1-methyl-4*b*,6,7,8,9,10-hexahydro-5*H*-7,9a-methanobenzo[*a*]azulen-8-yl)methyl)propan-1-aminium chloride **27**

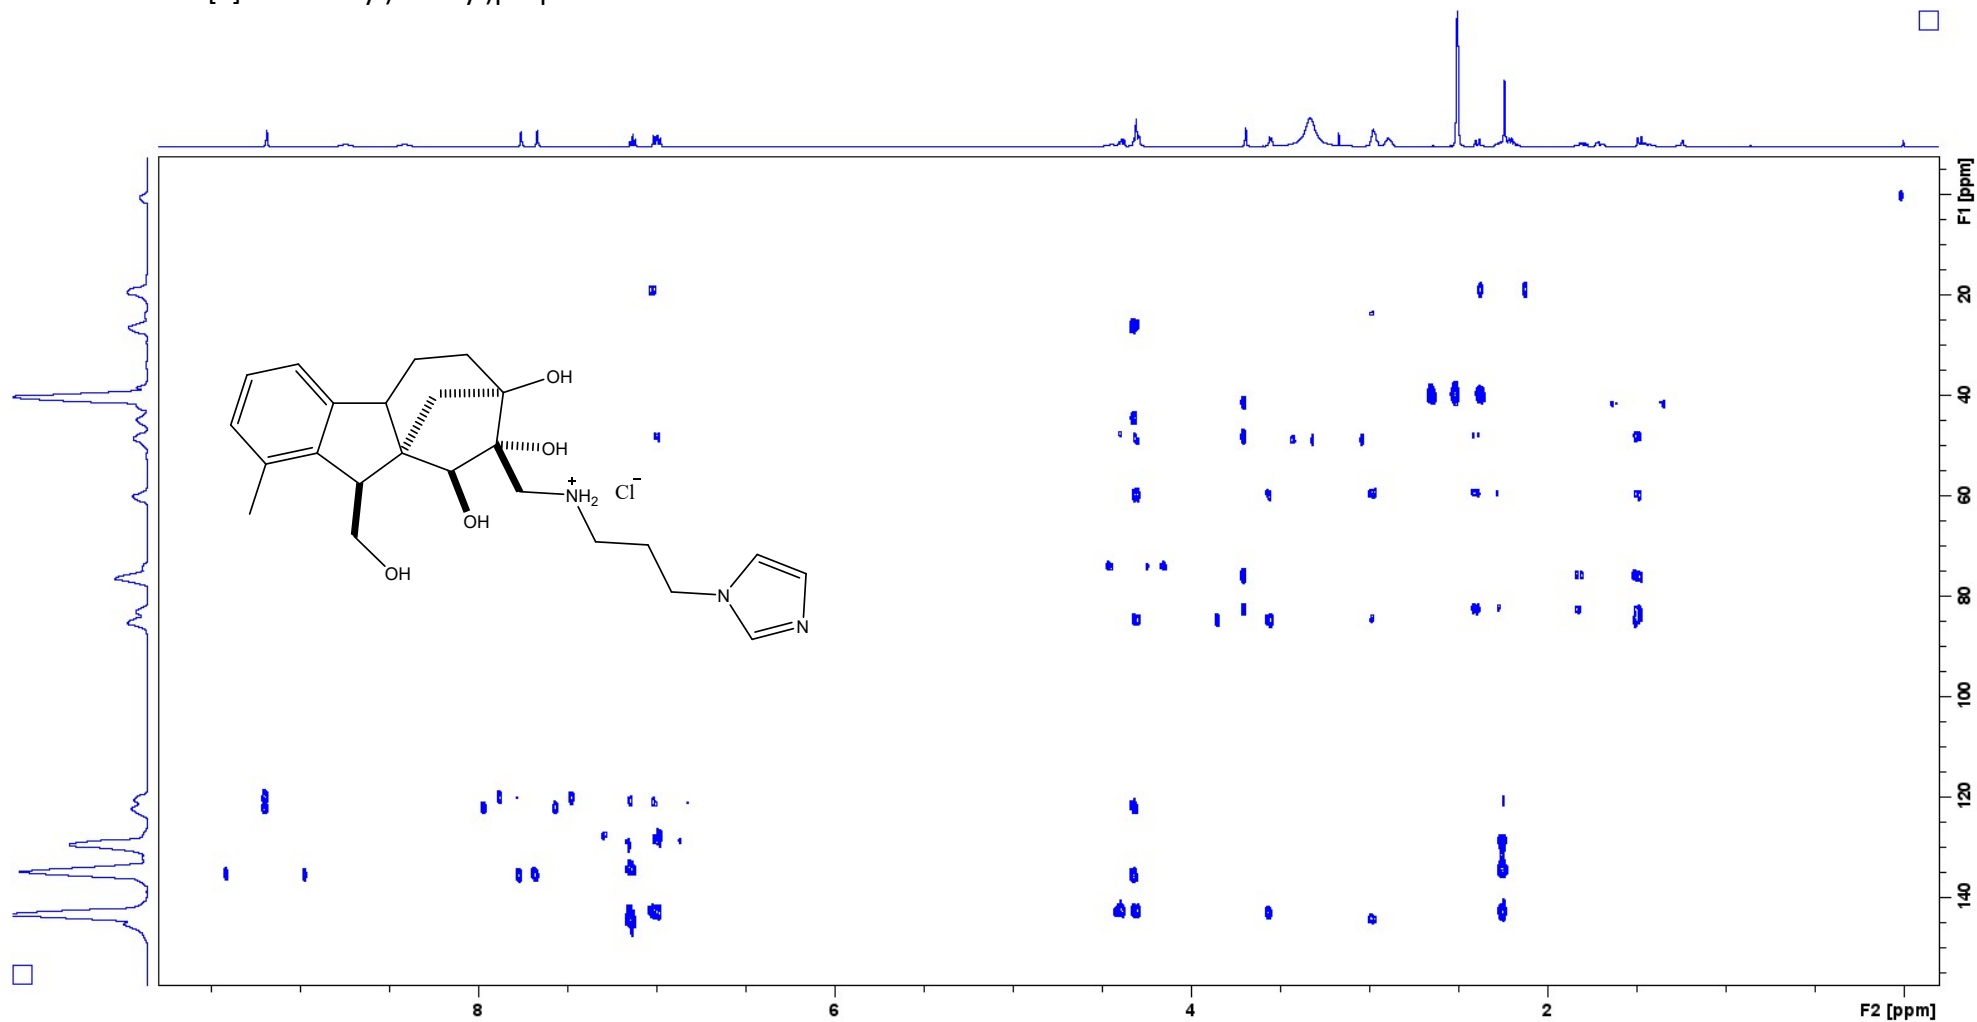

<sup>1</sup>H-NMR (500 MHz) of (7*S*,8*R*,9*S*,9*aR*,10*S*)-8-(((2-((5-Fluoro-2-((4-(trifluoromethyl)phenyl)amino)pyrimidin-4-yl)amino)ethyl)amino)methyl)-10-(hydroxymethyl)-1-methyl-4*b*,5,6,8,9,10-hexahydro-7*H*-7,9*a*-methanobenzo[*a*]azulene-7,8,9-triol **28**

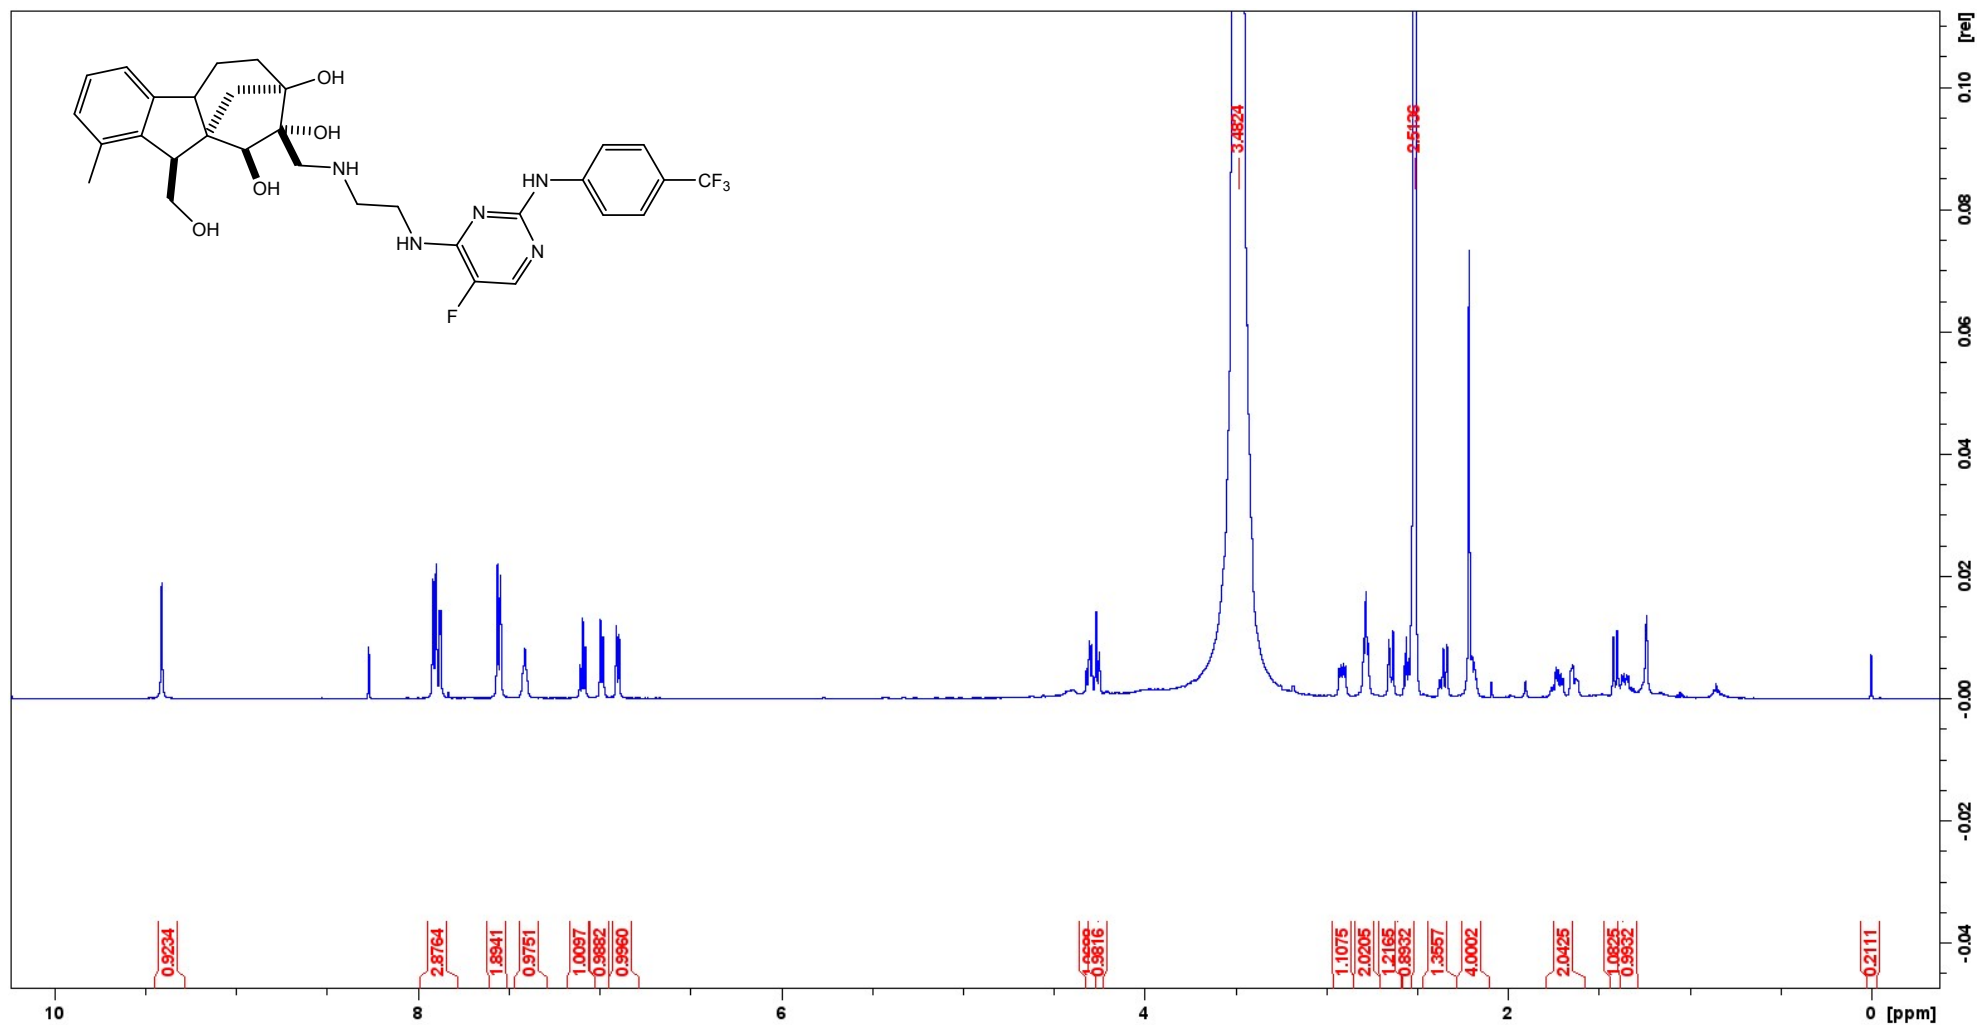



$^{13}\text{C}\{^1\text{H}\}$  J-MOD NMR (125 MHz) of (7*S*,8*R*,9*S*,9*aR*,10*S*)-8-(((2-((5-Fluoro-2-((4-(trifluoromethyl)phenyl)amino)pyrimidin-4-yl)amino)ethyl)amino)methyl)-10-(hydroxymethyl)-1-methyl-4*b*,5,6,8,9,10-hexahydro-7*H*-7,9*a*-methanobenzo[*a*]azulene-7,8,9-triol **28**

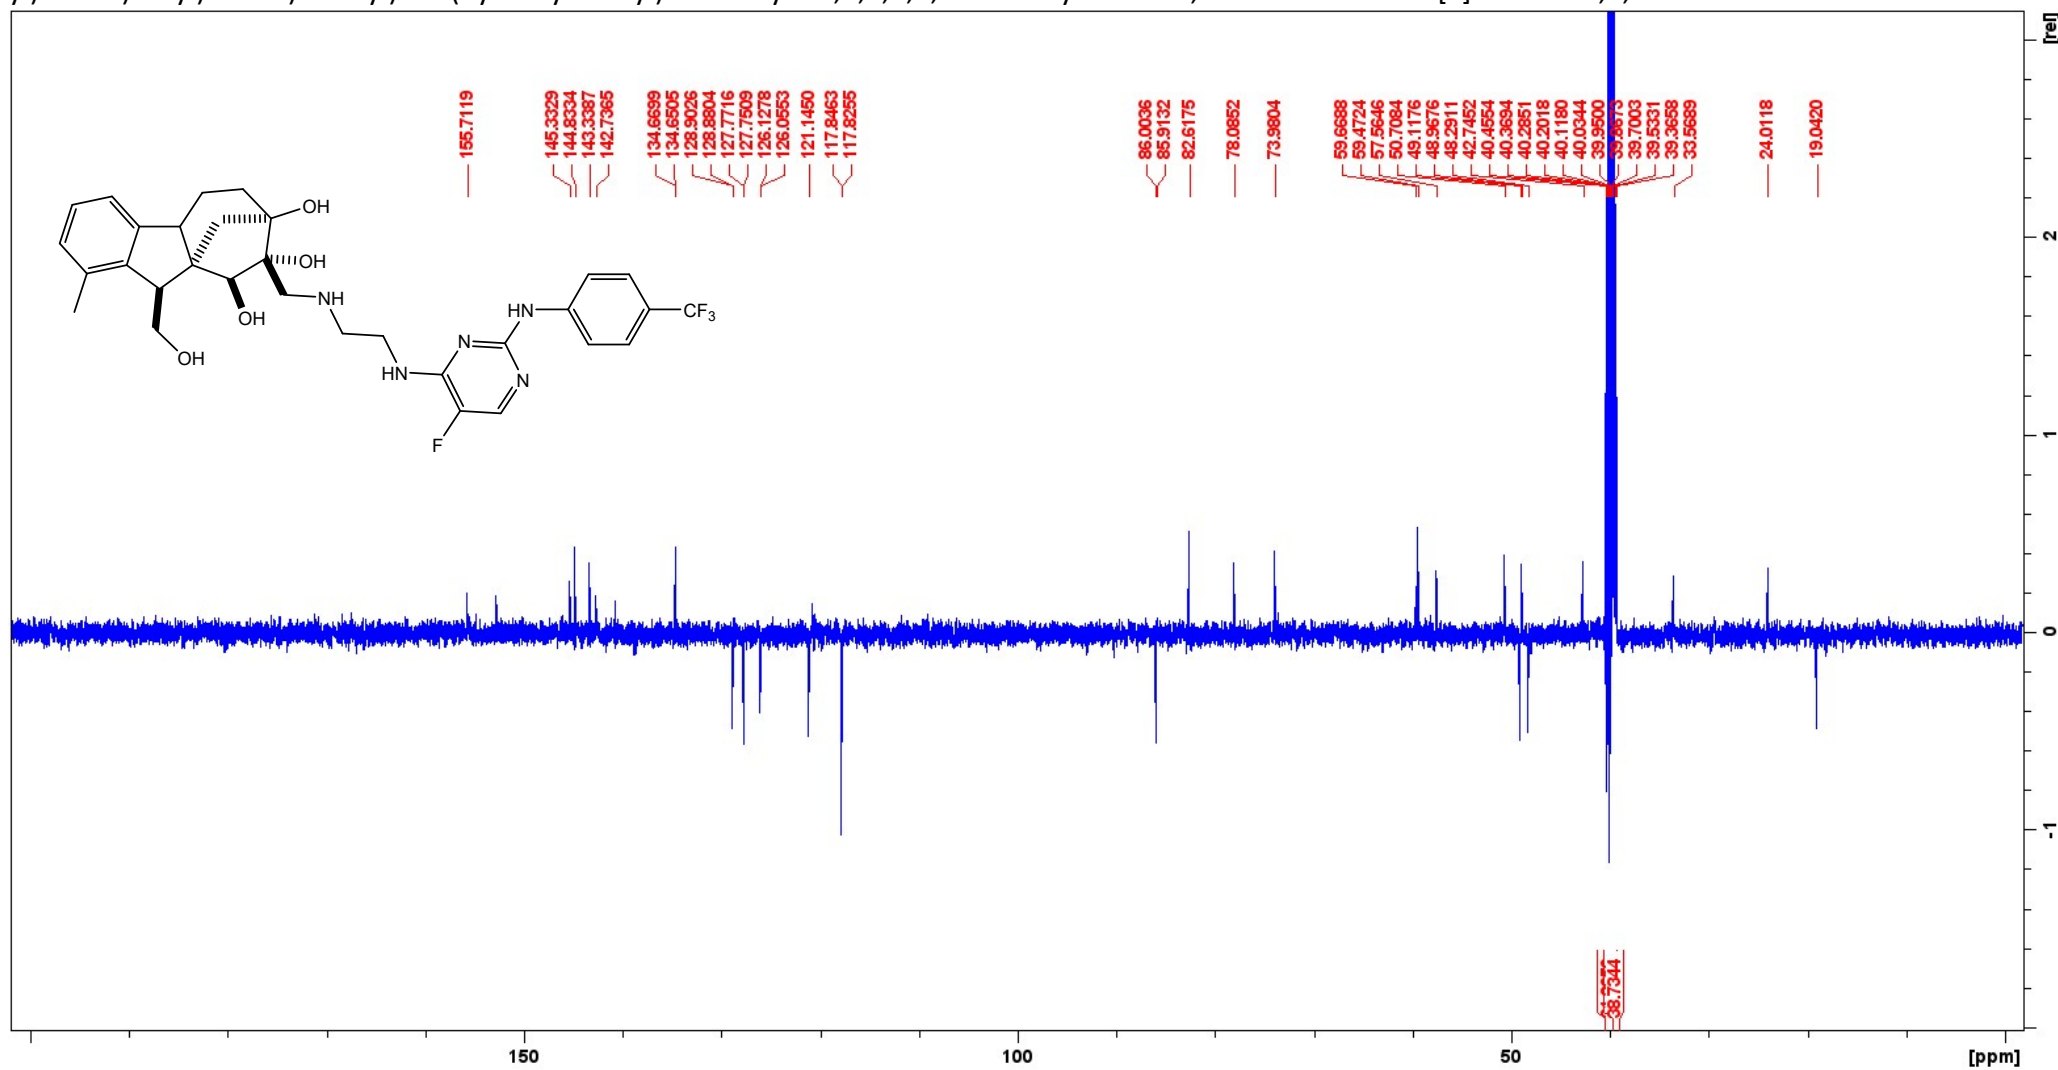

<sup>19</sup>F NMR (470 MHz) of (7*S*,8*R*,9*S*,9*aR*,10*S*)-8-(((2-((5-Fluoro-2-((4-(trifluoromethyl)phenyl)amino)pyrimidin-4-yl)amino)ethyl)amino)methyl)-10-(hydroxymethyl)-1-methyl-4*b*,5,6,8,9,10-hexahydro-7*H*-7,9a-methanobenzo[*a*]azulene-7,8,9-triol **28**

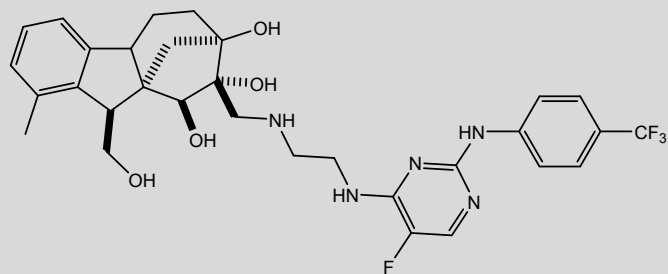

$^1\text{H-NMR}$  (500 MHz) of (7*S*,8*R*,9*S*,9*aR*,10*S*)-8-((4-(((5-Fluoro-2-((1-methyl-1*H*-pyrazol-4-yl)amino)pyrimidin-4-yl)amino)methyl)-1*H*-1,2,3-triazol-1-yl)methyl)-10-(hydroxymethyl)-1-methyl-4*b*,5,6,8,9,10-hexahydro-7*H*-7,9*a*-methanobenzo[*a*]azulene-7,8,9-triol **36**

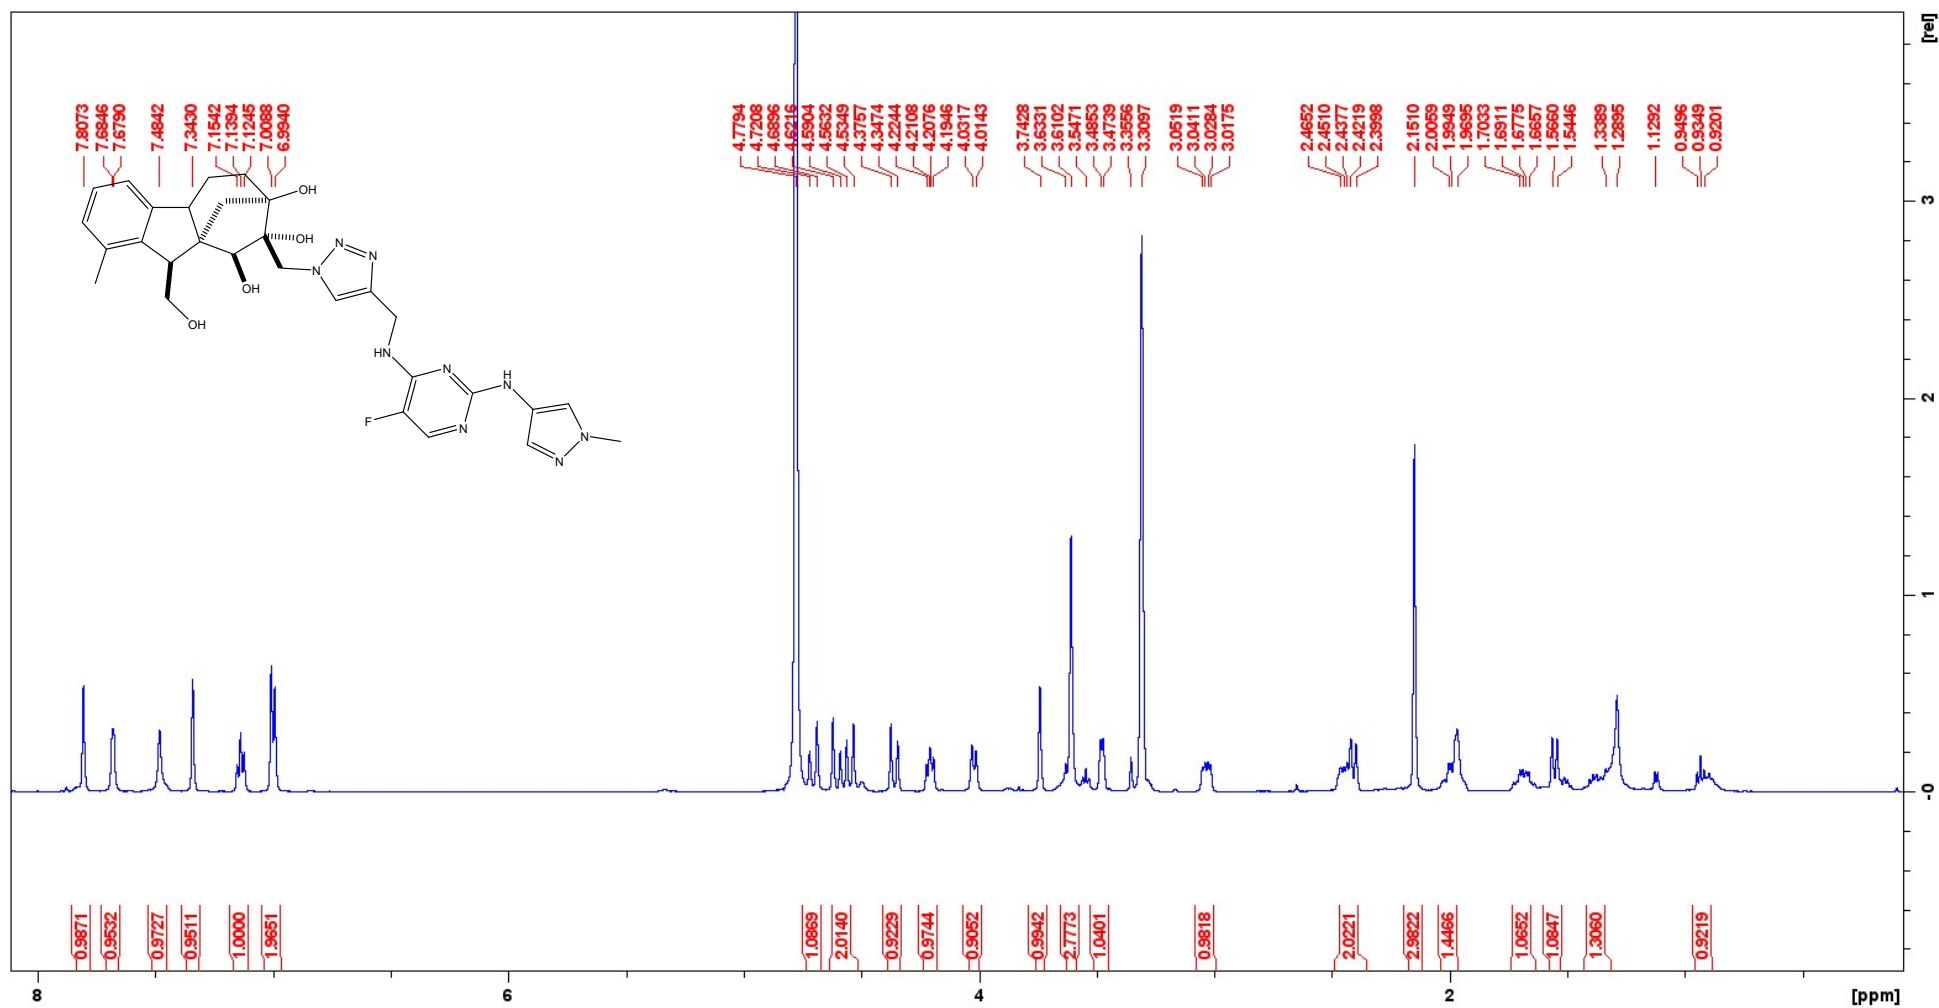

$^{13}\text{C}\{^1\text{H}\}$  NMR (125 MHz) of (7*S*,8*R*,9*S*,9*aR*,10*S*)-8-((4-(((5-Fluoro-2-((1-methyl-1*H*-pyrazol-4-yl)amino)pyrimidin-4-yl)amino)methyl)-1*H*-1,2,3-triazol-1-yl)methyl)-10-(hydroxymethyl)-1-methyl-4*b*,5,6,8,9,10-hexahydro-7*H*-7,9*a*-methanobenzo[*a*]azulene-7,8,9-triol **36**

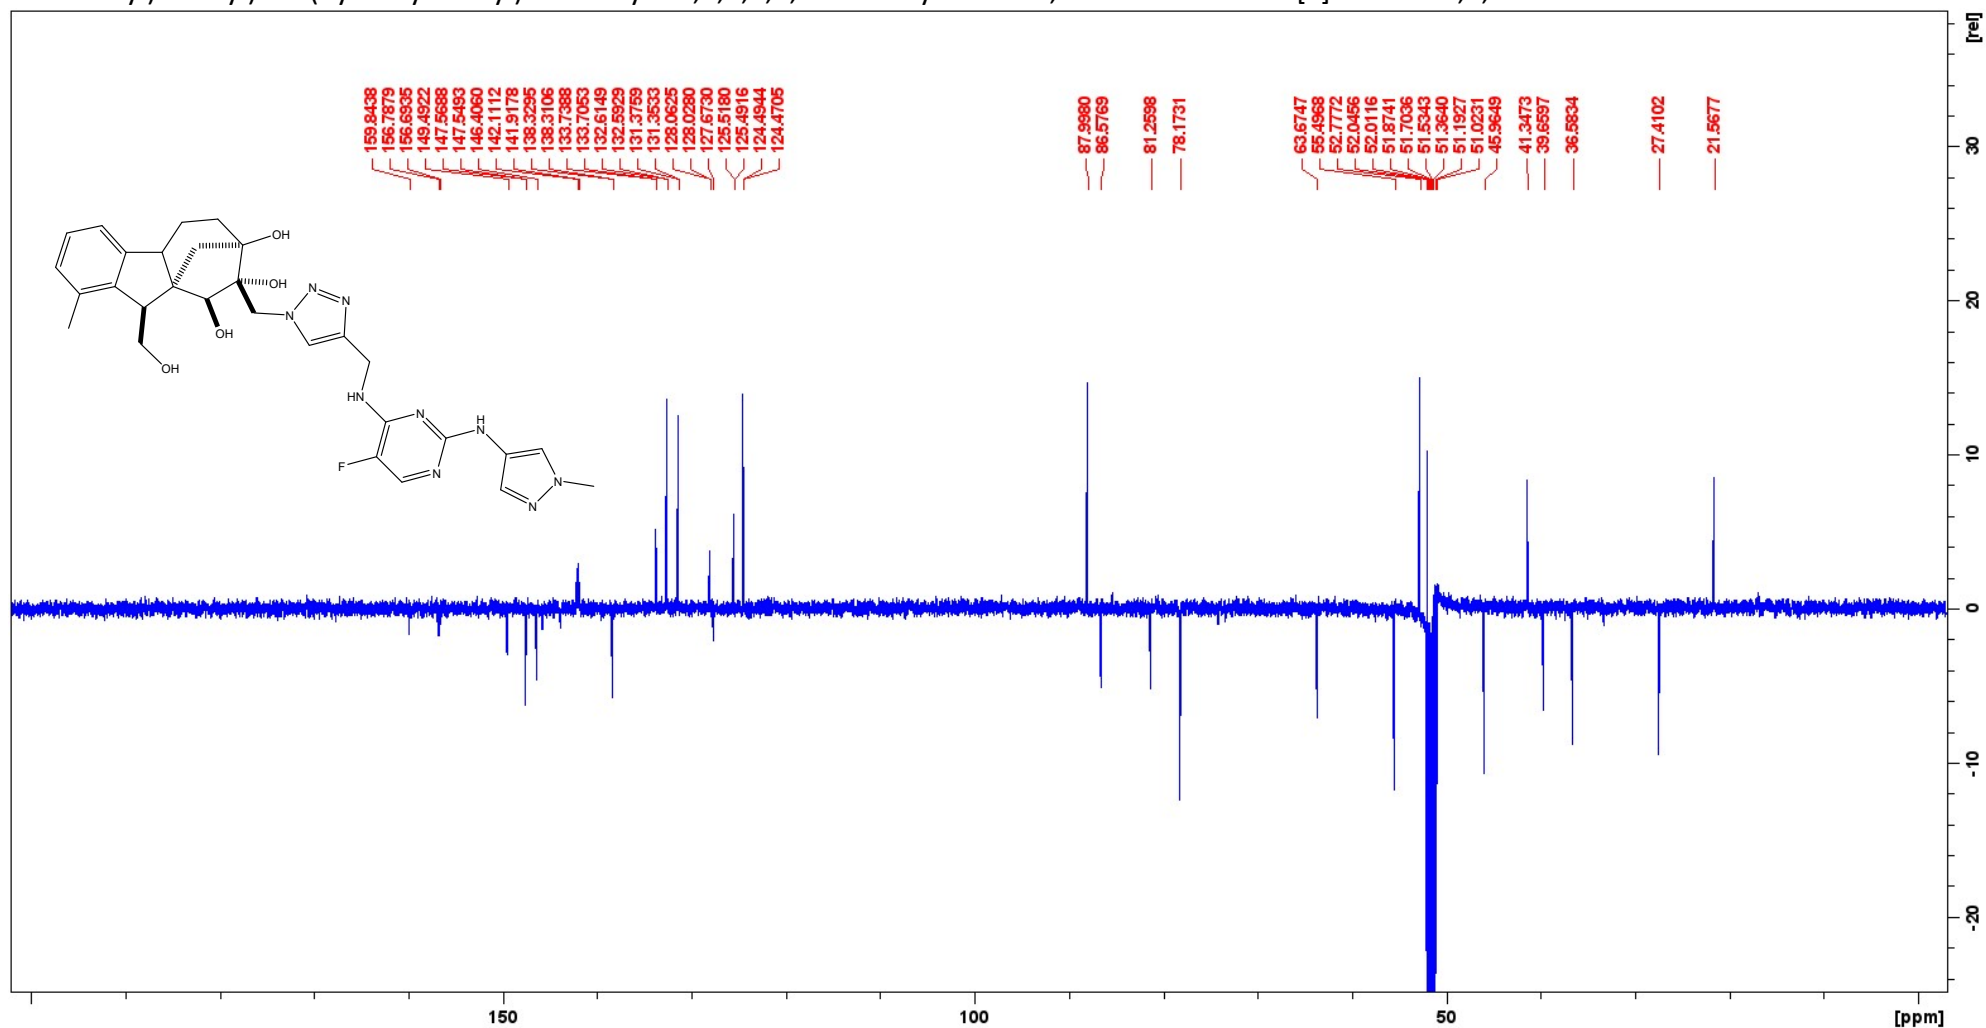

$^{19}\text{F}$  J-MOD NMR (470 MHz) of (7*S*,8*R*,9*S*,9*aR*,10*S*)-8-((4-(((5-Fluoro-2-((1-methyl-1*H*-pyrazol-4-yl)amino)pyrimidin-4-yl)amino)methyl)-1*H*-1,2,3-triazol-1-yl)methyl)-10-(hydroxymethyl)-1-methyl-4*b*,5,6,8,9,10-hexahydro-7*H*-7,9*a*-methanobenzo[*a*]azulene-7,8,9-triol **36**

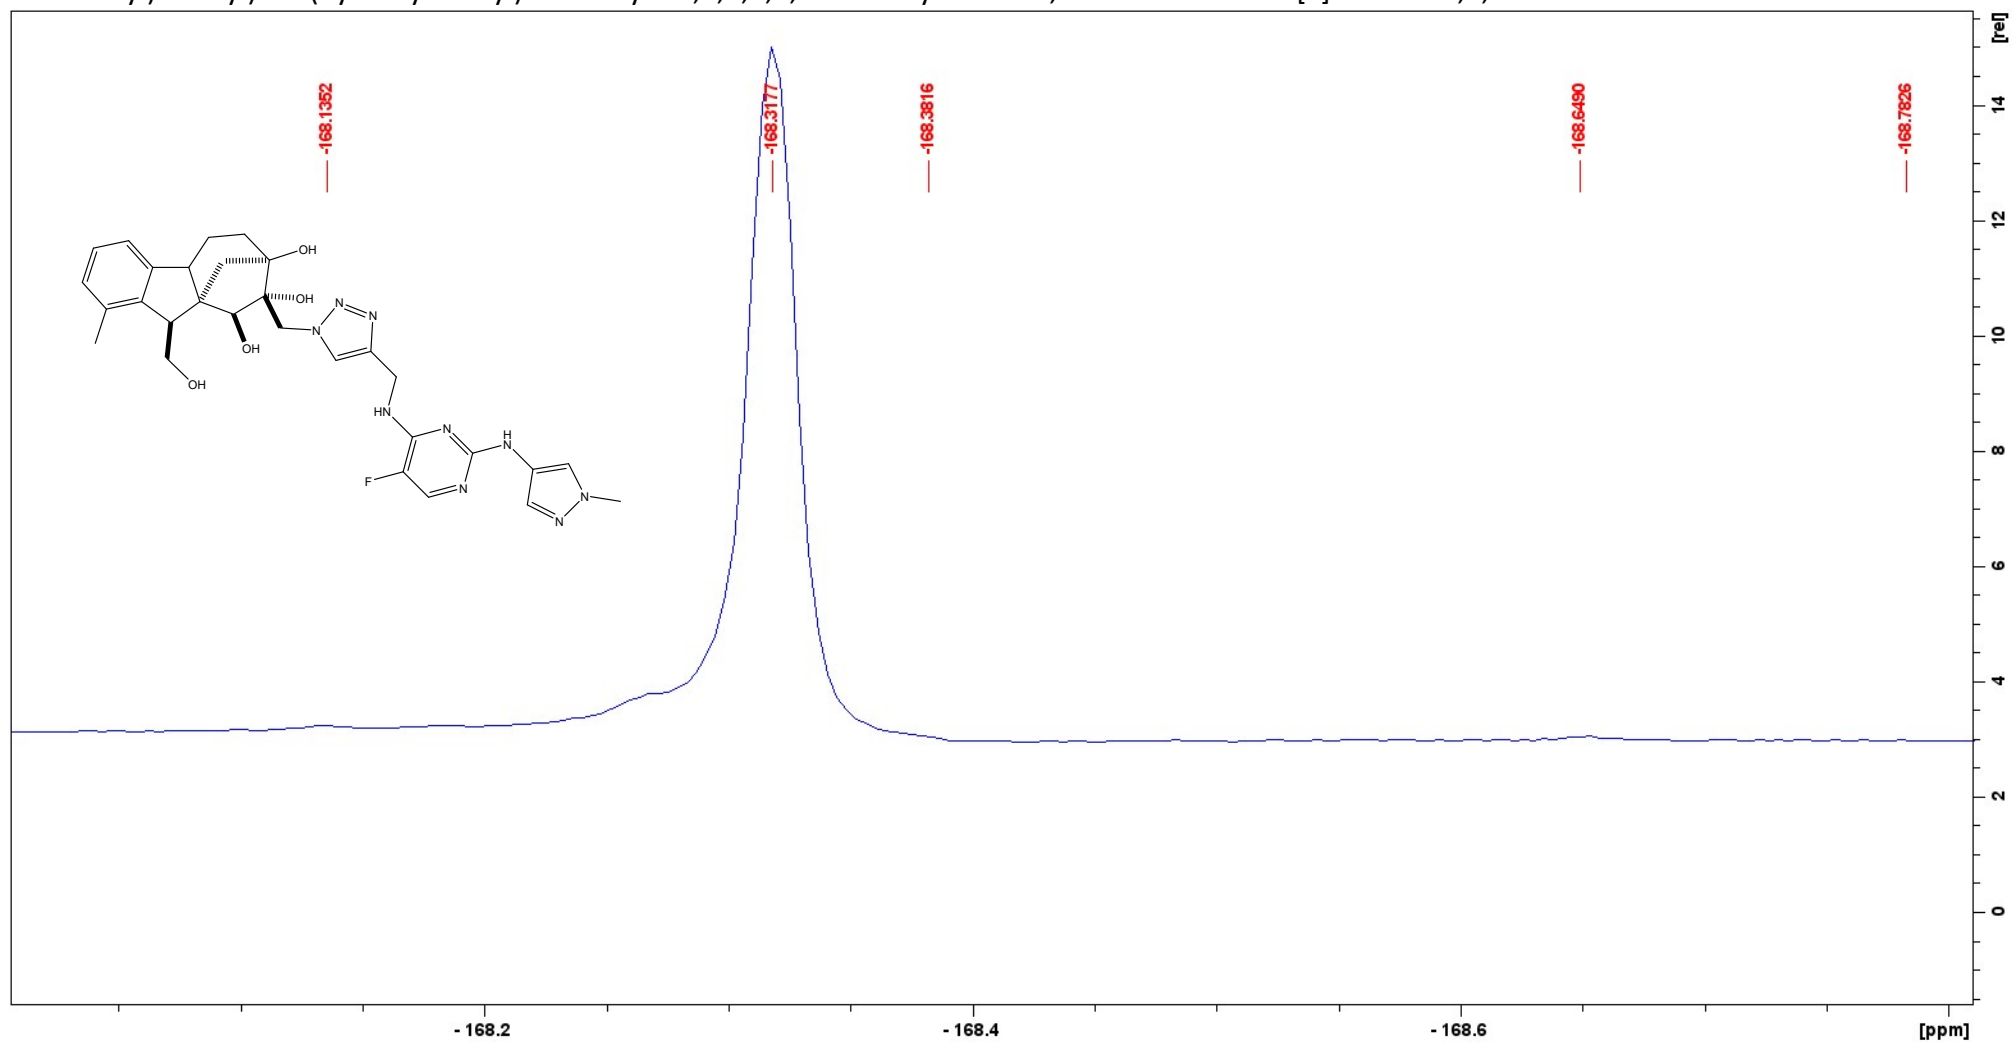

<sup>1</sup>H-NMR (500 MHz) of (7*S*,8*R*,9*S*,9*aR*,10*S*)-8-((4-(((5-Chloro-2-((1-methyl-1*H*-pyrazol-4-yl)amino)pyrimidin-4-yl)amino)methyl)-1*H*-1,2,3-triazol-1-yl)methyl)-10-(hydroxymethyl)-1-methyl-4*b*,5,6,8,9,10-hexahydro-7*H*-7,9*a*-methanobenzo[*a*]azulene-7,8,9-triol **37**

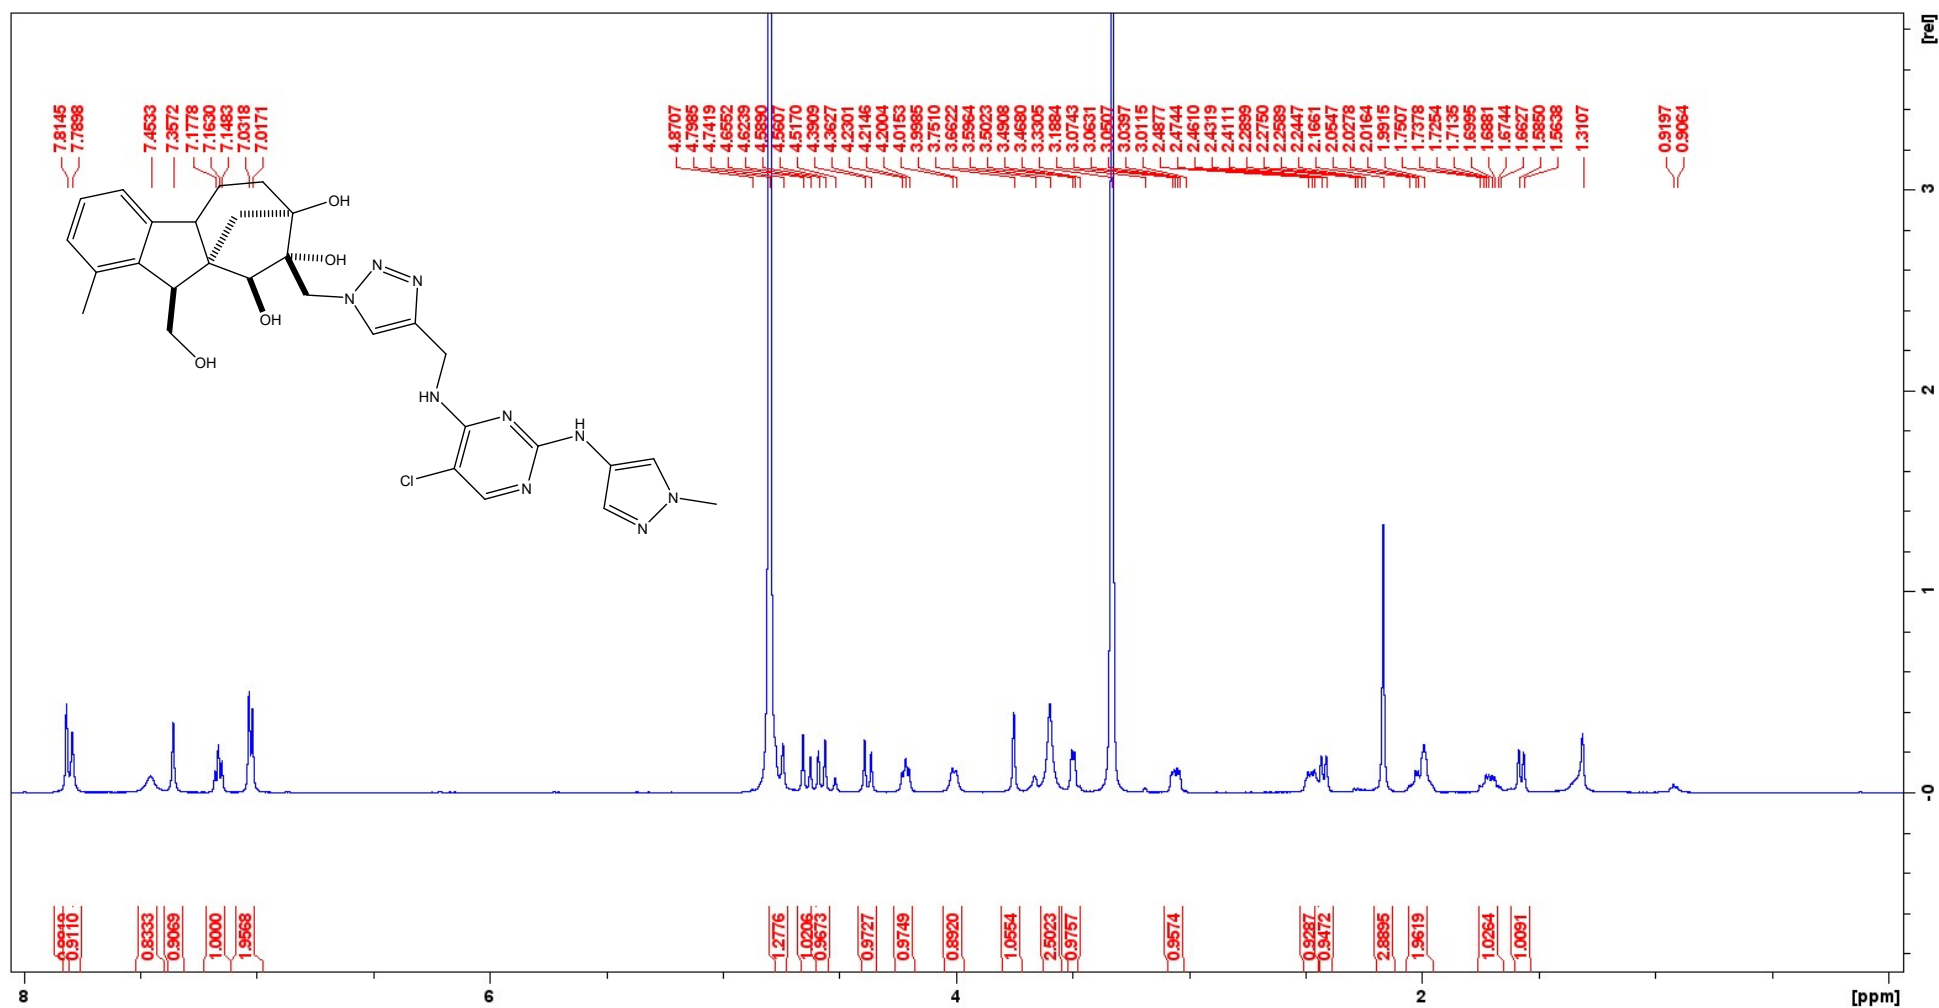

$^{13}\text{C}\{^1\text{H}\}$  J-MOD NMR (125 MHz) of (7*S*,8*R*,9*S*,9*aR*,10*S*)-8-((4-(((5-Chloro-2-((1-methyl-1*H*-pyrazol-4-yl)amino)pyrimidin-4-yl)amino)methyl)-1*H*-1,2,3-triazol-1-yl)methyl)-10-(hydroxymethyl)-1-methyl-4*b*,5,6,8,9,10-hexahydro-7*H*-7,9*a*-methanobenzo[*a*]azulene-7,8,9-triol **37**

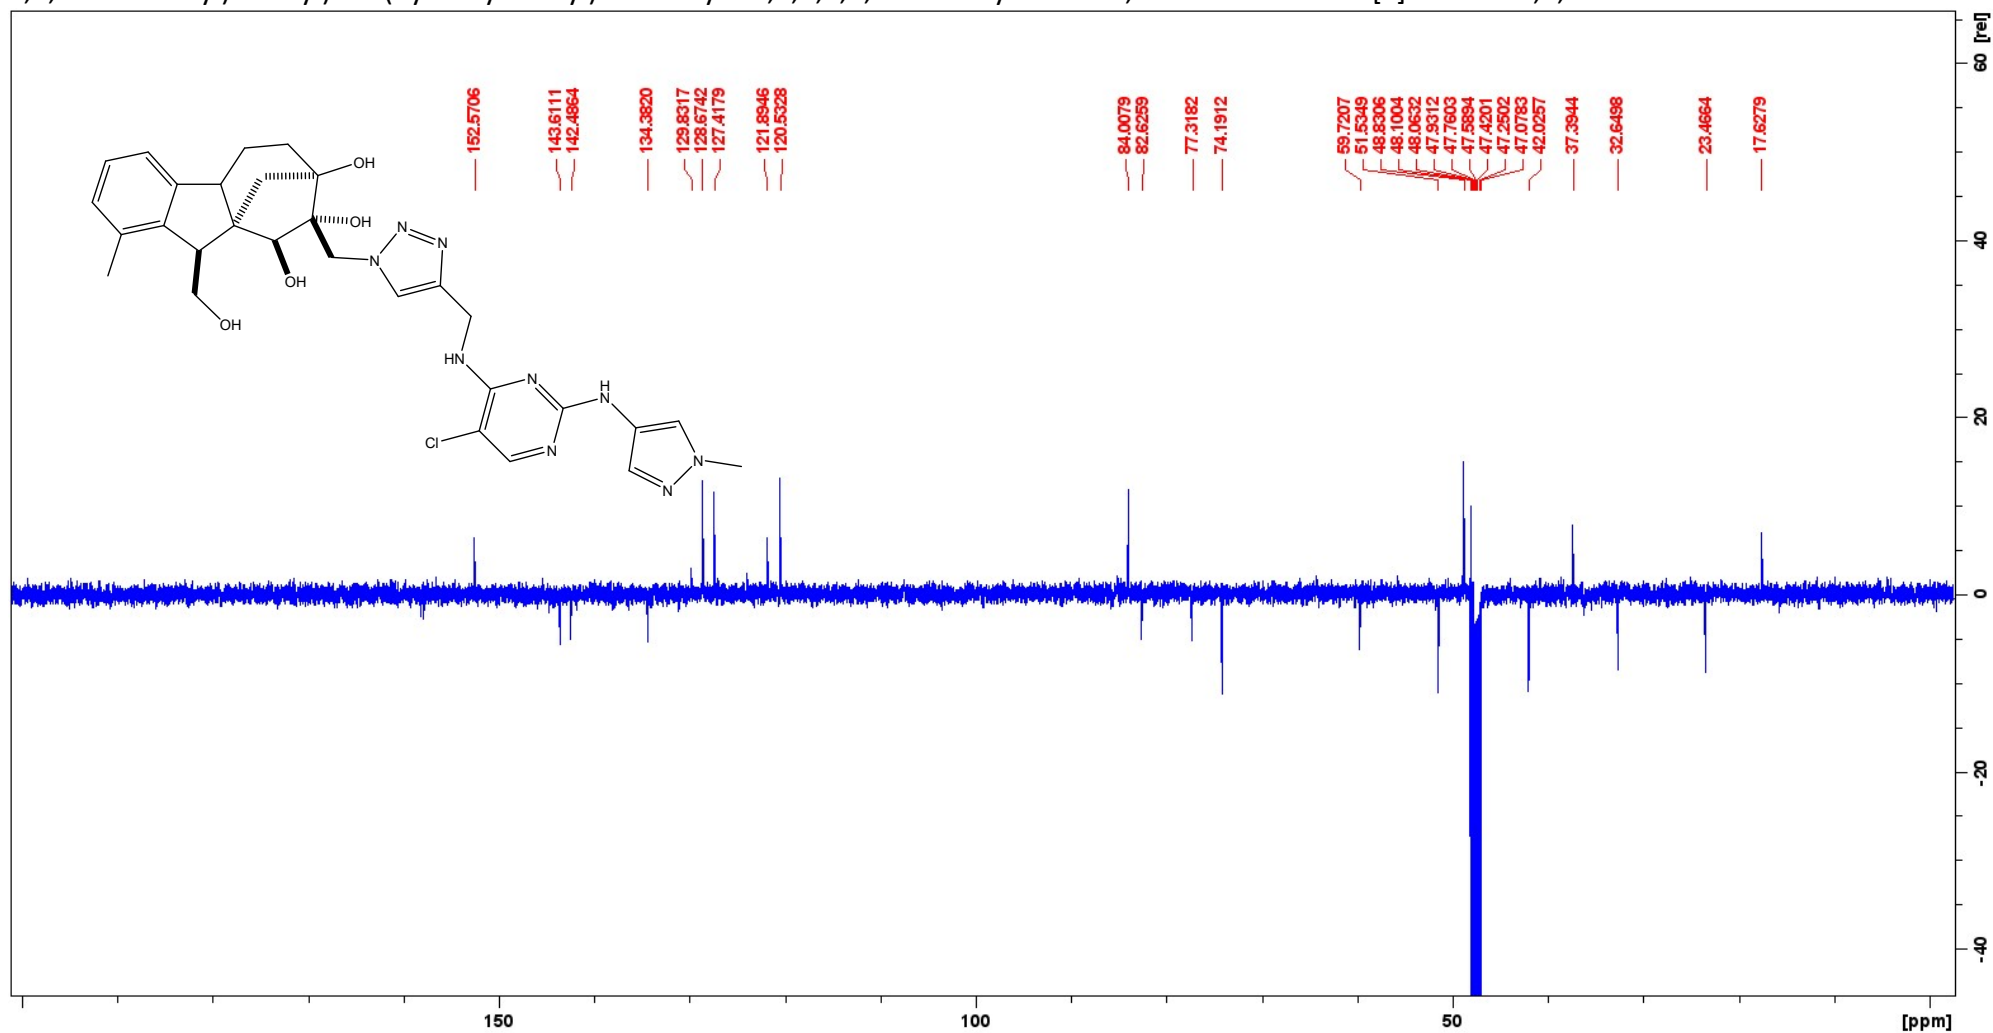

COSY of (7S,8R,9S,9aR,10S)-8-((4-(((5-Chloro-2-((1-methyl-1H-pyrazol-4-yl)amino)pyrimidin-4-yl)amino)methyl)-1H-1,2,3-triazol-1-yl)methyl)-10-(hydroxymethyl)-1-methyl-4b,5,6,8,9,10-hexahydro-7H-7,9a-methanobenzo[a]azulene-7,8,9-triol **37**

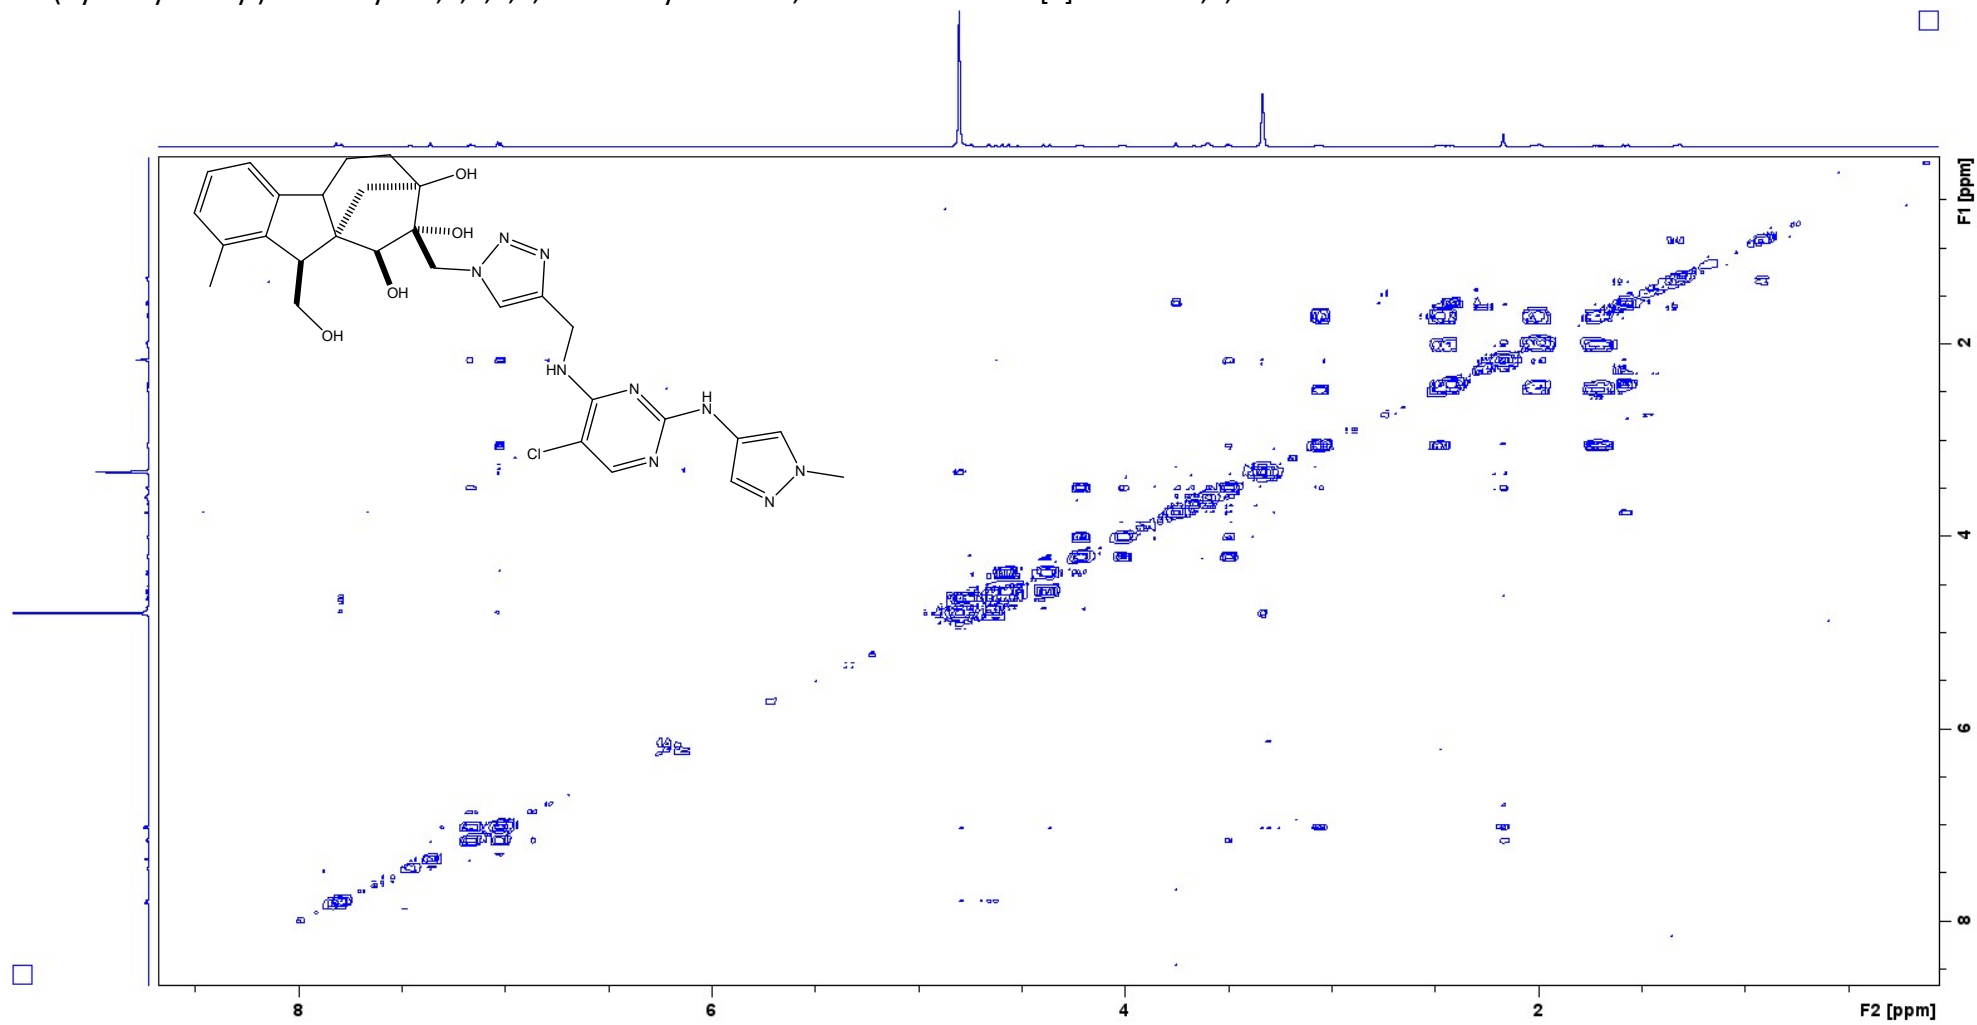



NOESY of (7*S*,8*R*,9*S*,9*aR*,10*S*)-8-((4-(((5-Chloro-2-((1-methyl-1*H*-pyrazol-4-yl)amino)pyrimidin-4-yl)amino)methyl)-1*H*-1,2,3-triazol-1-yl)methyl)-10-(hydroxymethyl)-1-methyl-4*b*,5,6,8,9,10-hexahydro-7*H*-7,9*a*-methanobenzo[*a*]azulene-7,8,9-triol **37**

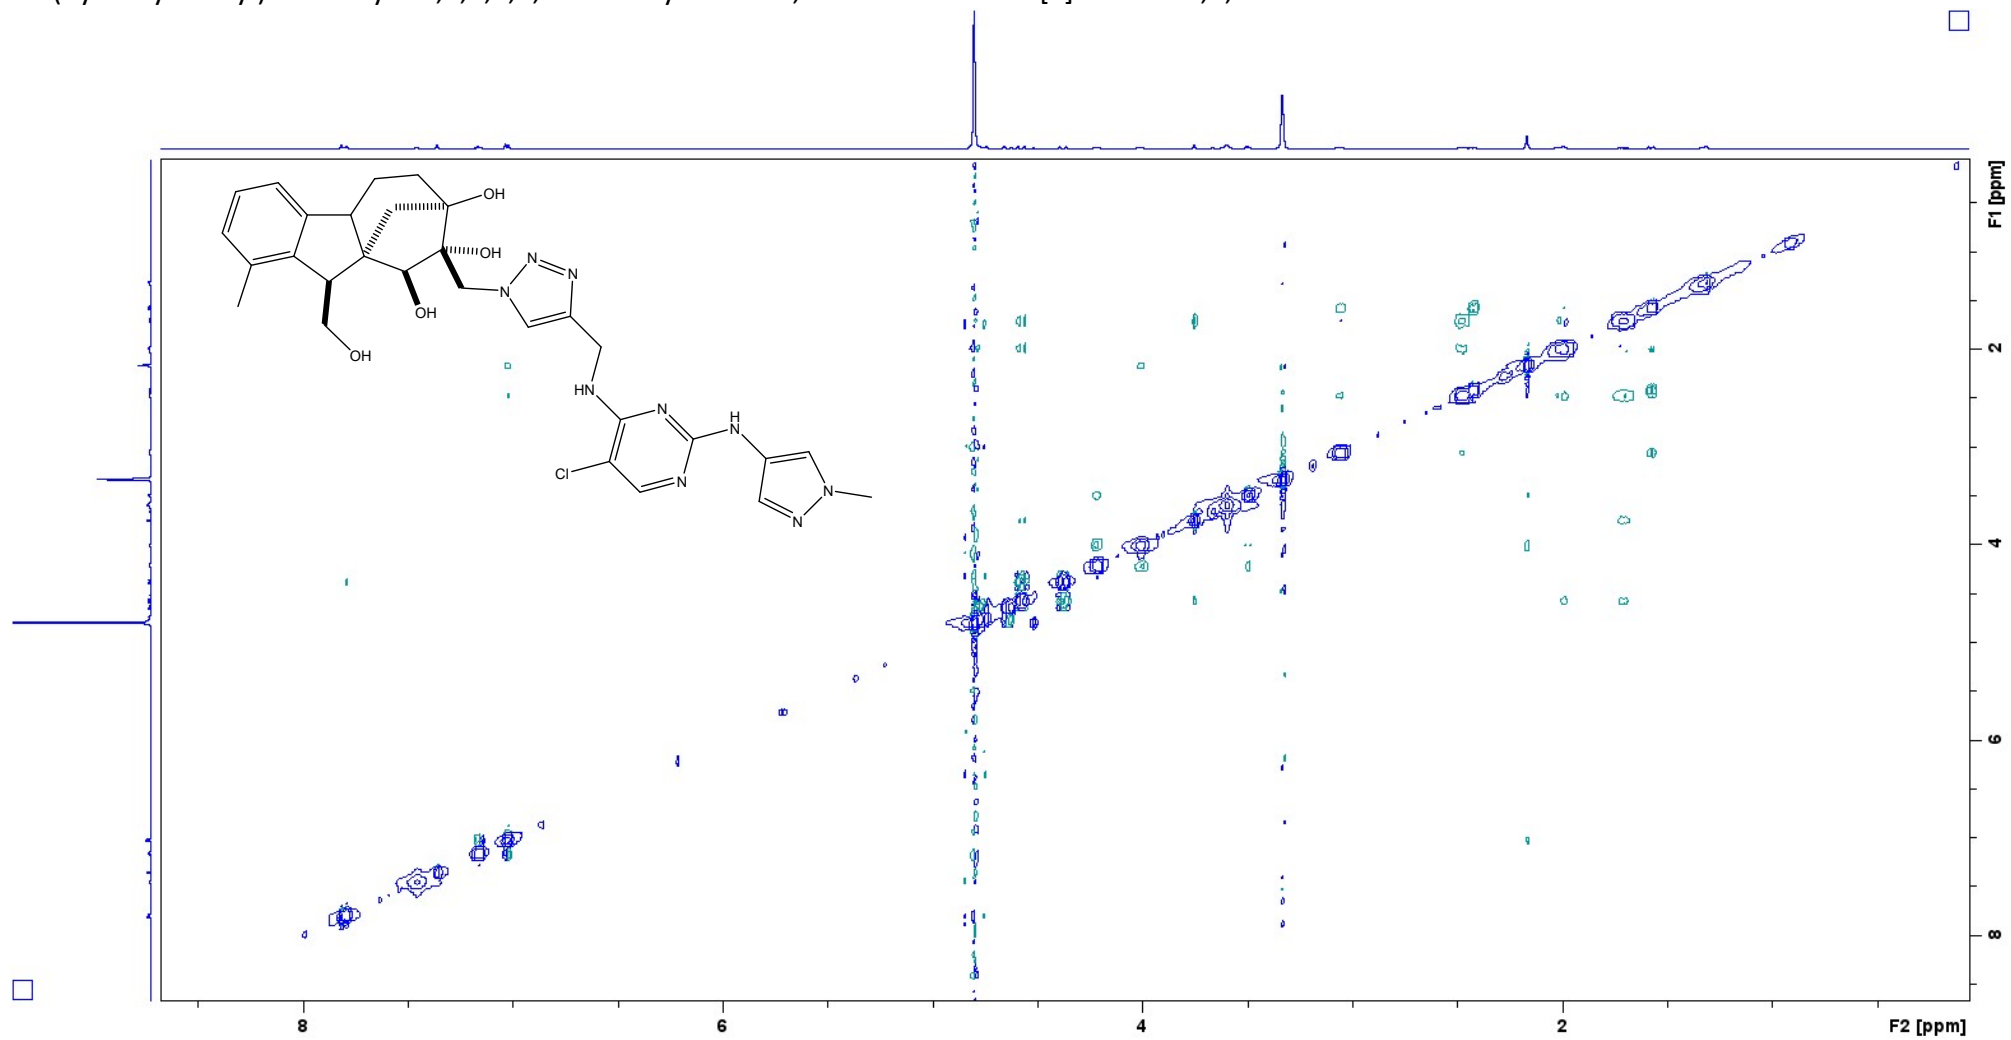

HSQC of (7*S*,8*R*,9*S*,9*aR*,10*S*)-8-((4-(((5-Chloro-2-((1-methyl-1*H*-pyrazol-4-yl)amino)pyrimidin-4-yl)amino)methyl)-1*H*-1,2,3-triazol-1-yl)methyl)-10-(hydroxymethyl)-1-methyl-4*b*,5,6,8,9,10-hexahydro-7*H*-7,9*a*-methanobenzo[*a*]azulene-7,8,9-triol **37**

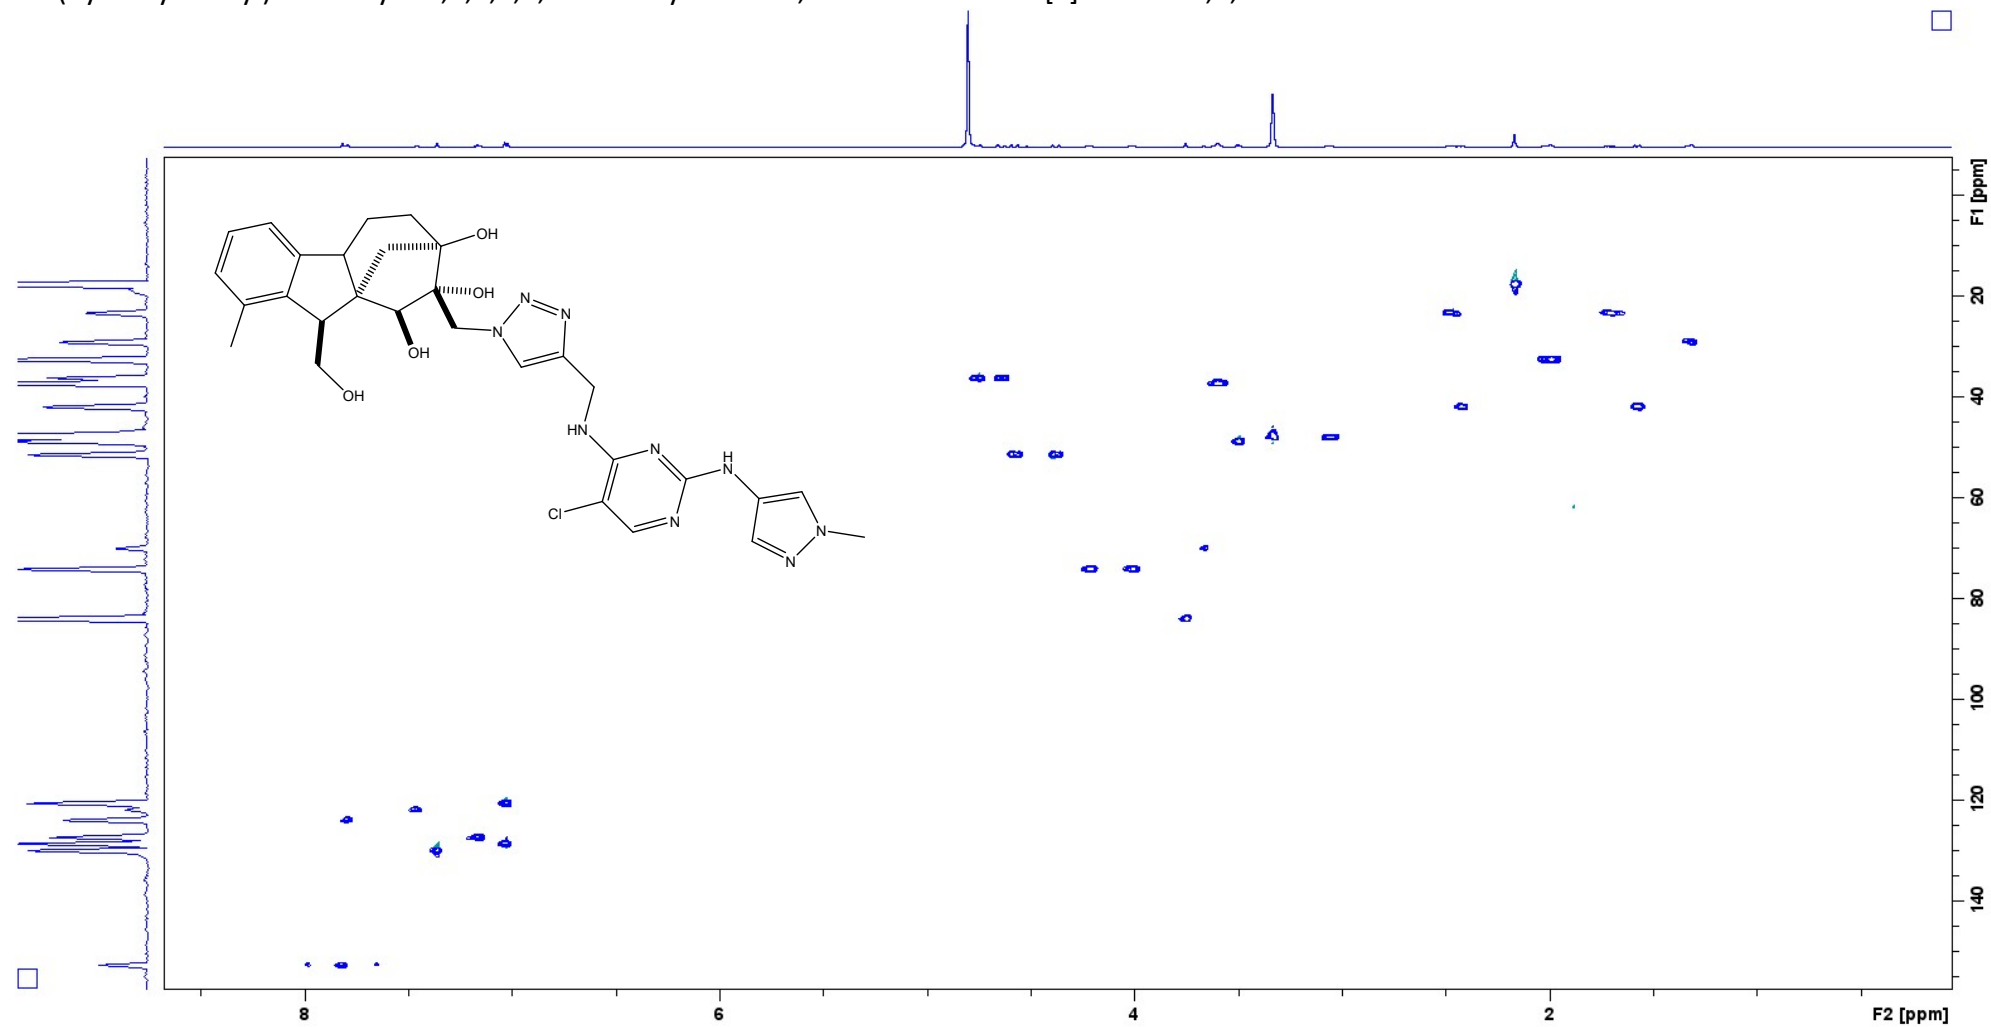

HMBC of (7*S*,8*R*,9*S*,9*aR*,10*S*)-8-((4-(((5-Chloro-2-((1-methyl-1*H*-pyrazol-4-yl)amino)pyrimidin-4-yl)amino)methyl)-1*H*-1,2,3-triazol-1-yl)methyl)-10-(hydroxymethyl)-1-methyl-4*b*,5,6,8,9,10-hexahydro-7*H*-7,9*a*-methanobenzo[*a*]azulene-7,8,9-triol **37**

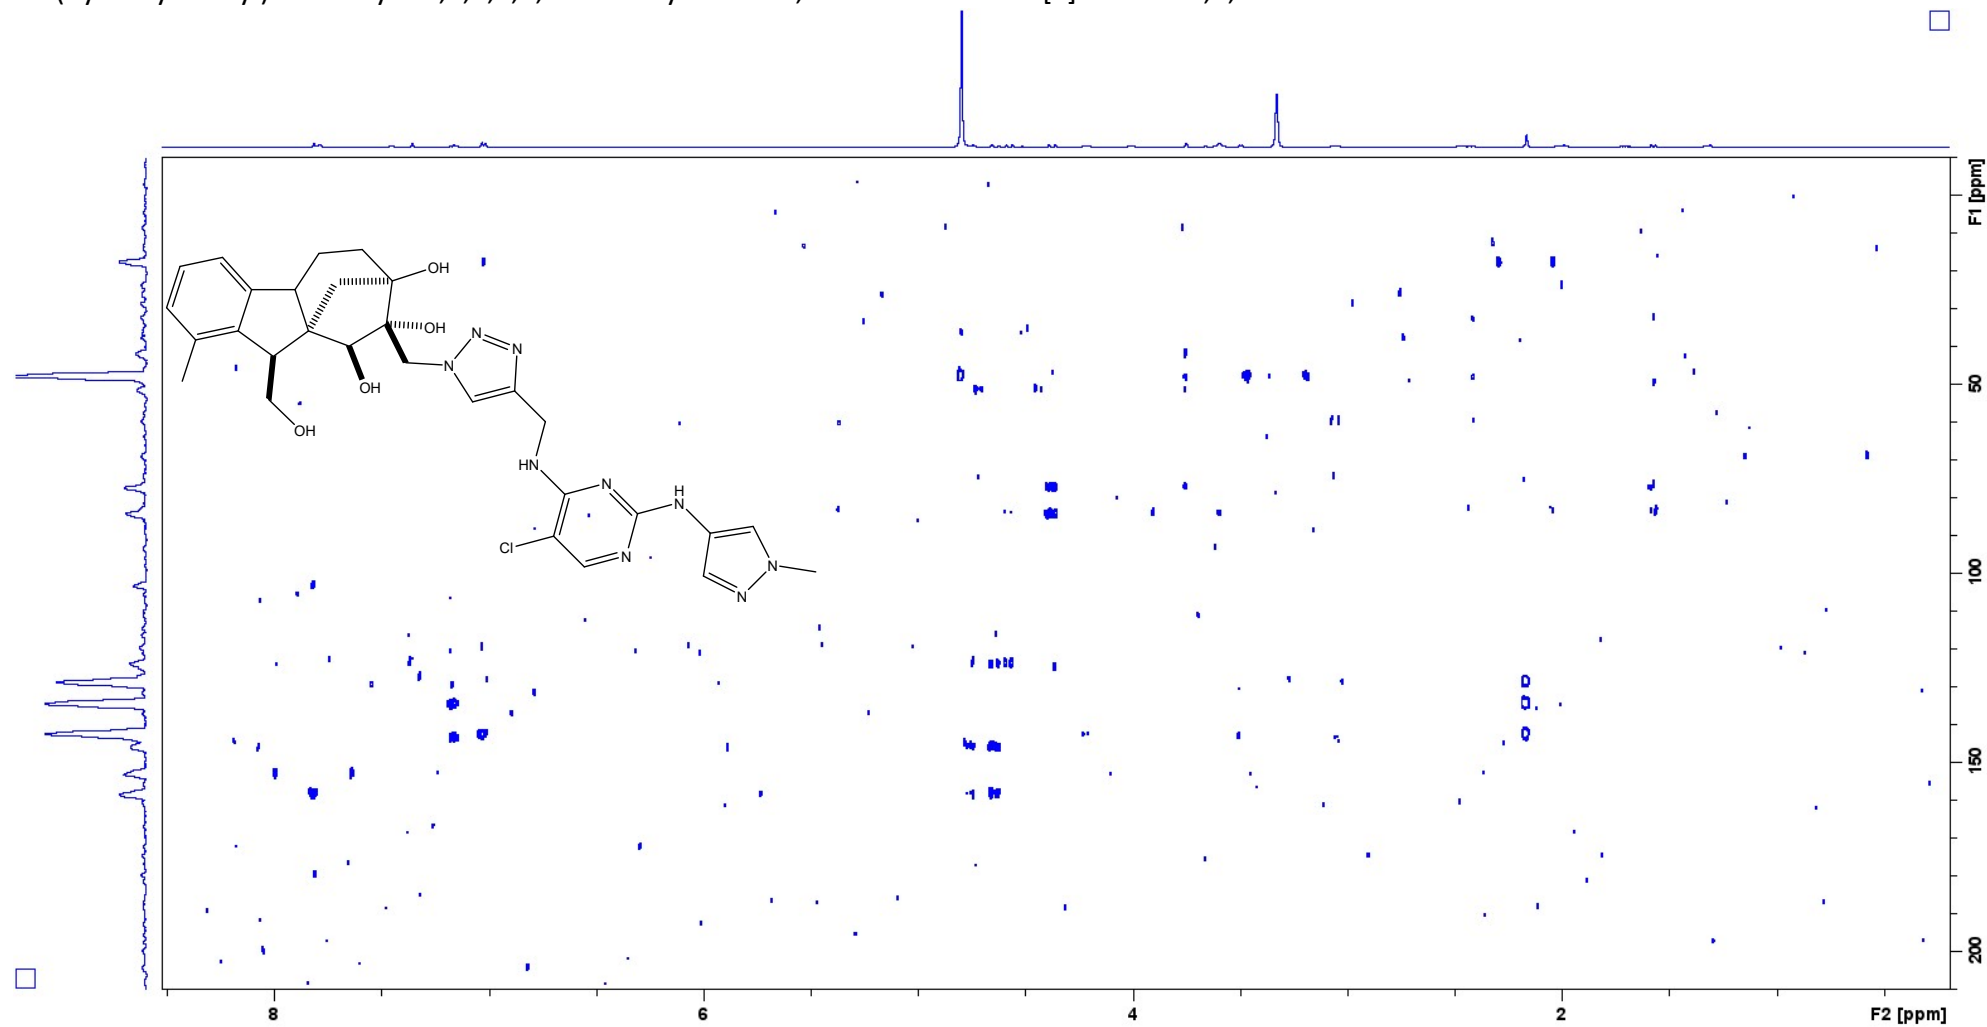

<sup>1</sup>H-NMR (500 MHz) of (7*S*,8*R*,9*S*,9*aR*,10*S*)-8-((4-(((5-Fluoro-2-((4-(trifluoromethyl)phenyl)amino)pyrimidin-4-yl)amino)methyl)-1*H*-1,2,3-triazol-1-yl)methyl)-10-(hydroxymethyl)-1-methyl-4*b*,5,6,8,9,10-hexahydro-7*H*-7,9*a*-methanobenzo[*a*]azulene-7,8,9-triol **38**

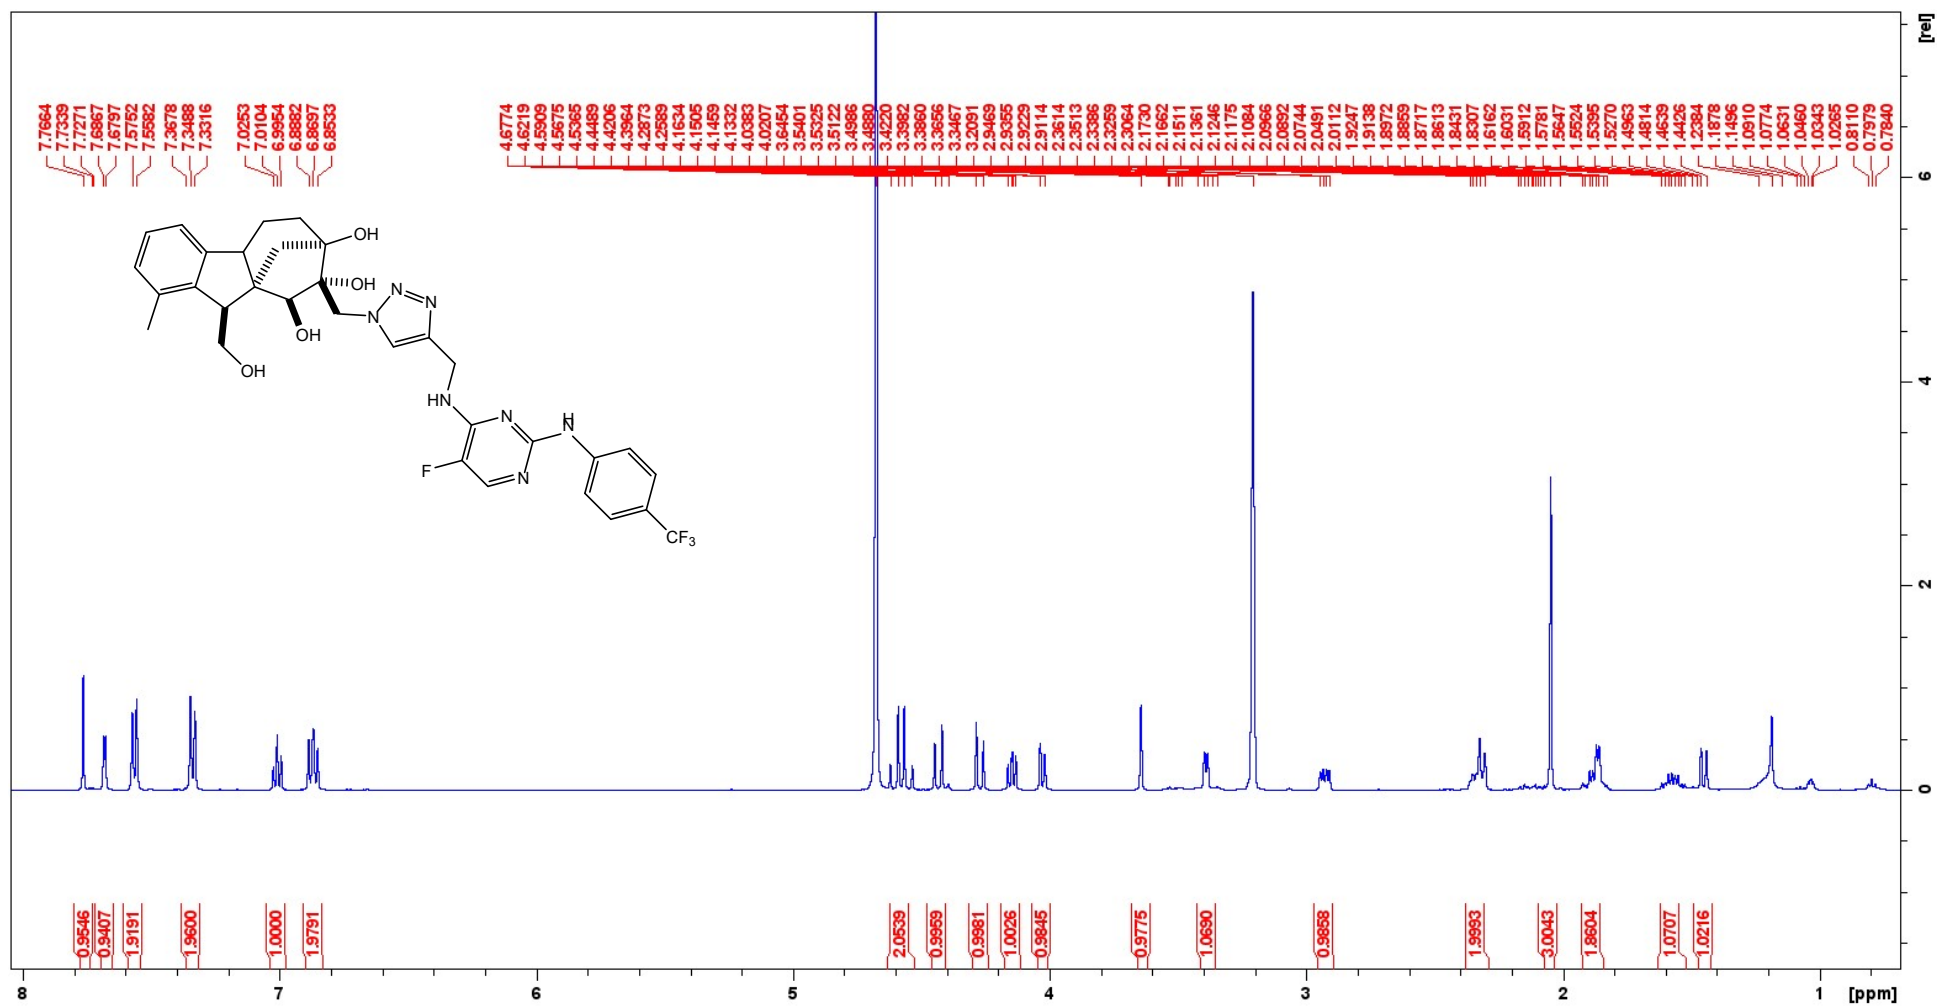

$^{13}\text{C}\{^1\text{H}\}$  J-MOD NMR (125 MHz) of (7S,8R,9S,9aR,10S)-8-((4-(((5-Fluoro-2-((4-(trifluoromethyl)phenyl)amino)pyrimidin-4-yl)amino)methyl)-1H-1,2,3-triazol-1-yl)methyl)-10-(hydroxymethyl)-1-methyl-4b,5,6,8,9,10-hexahydro-7H-7,9a-methanobenzo[a]azulene-7,8,9-triol **38**

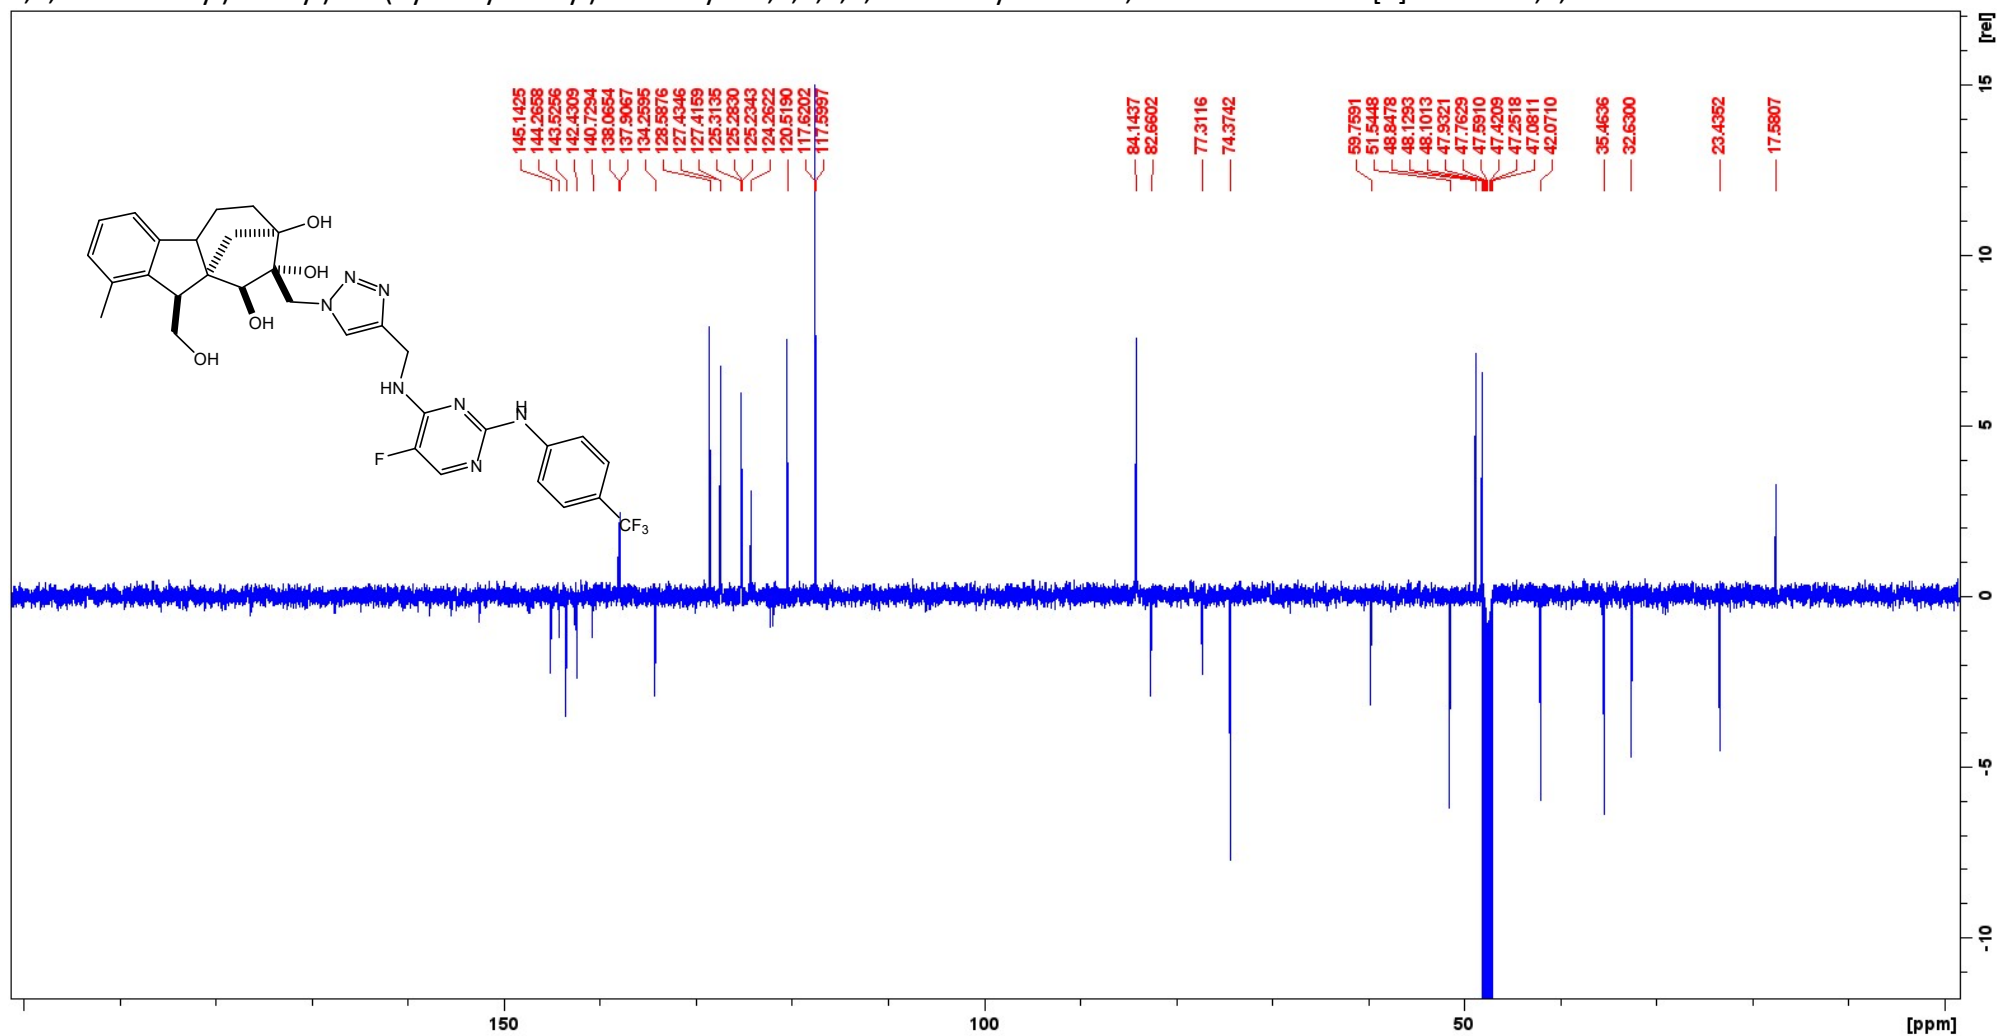

COSY of (7*S*,8*R*,9*S*,9*aR*,10*S*)-8-((4-(((5-Fluoro-2-((4-(trifluoromethyl)phenyl)amino)pyrimidin-4-yl)amino)methyl)-1*H*-1,2,3-triazol-1-yl)methyl)-10-(hydroxymethyl)-1-methyl-4*b*,5,6,8,9,10-hexahydro-7*H*-7,9*a*-methanobenzo[*a*]azulene-7,8,9-triol **38**

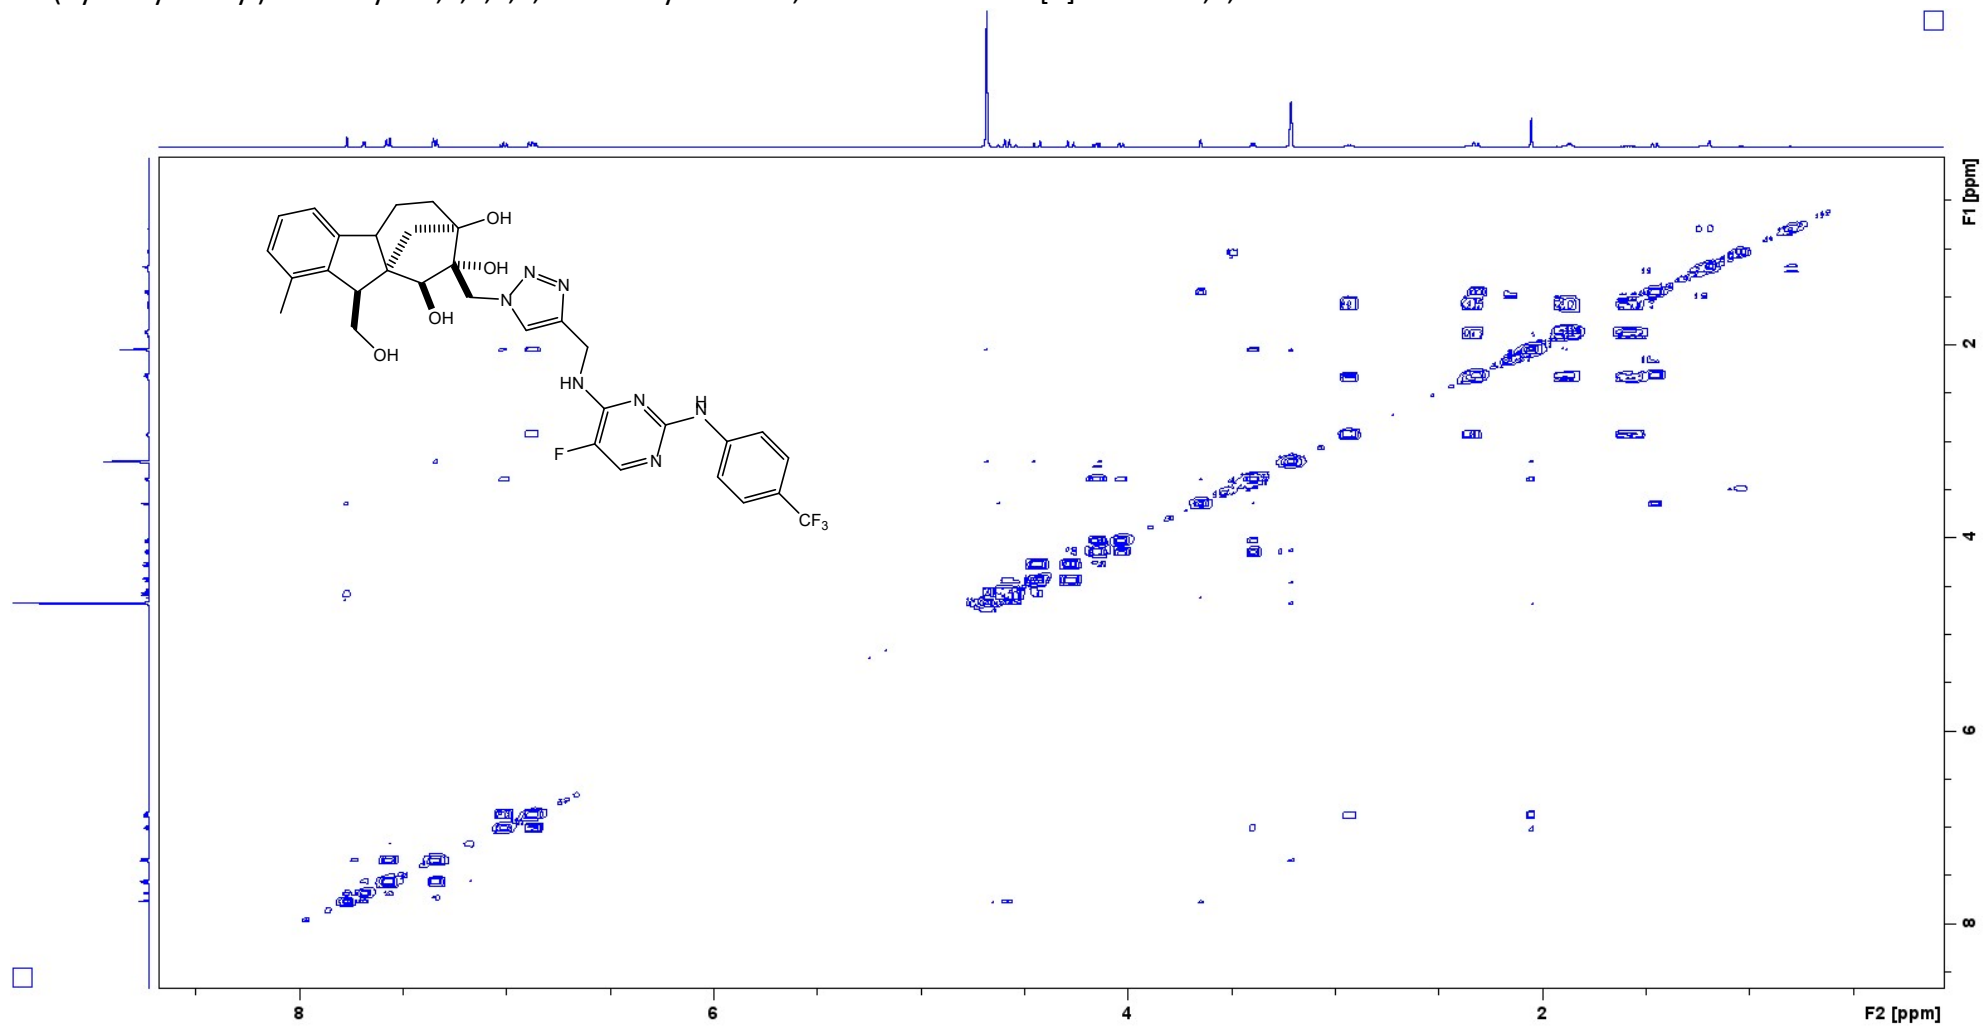

NOESY of (7*S*,8*R*,9*S*,9*aR*,10*S*)-8-(((5-Fluoro-2-((4-(trifluoromethyl)phenyl)amino)pyrimidin-4-yl)amino)methyl)-1*H*-1,2,3-triazol-1-yl)methyl)-10-(hydroxymethyl)-1-methyl-4*b*,5,6,8,9,10-hexahydro-7*H*-7,9*a*-methanobenzo[*a*]azulene-7,8,9-triol **38**

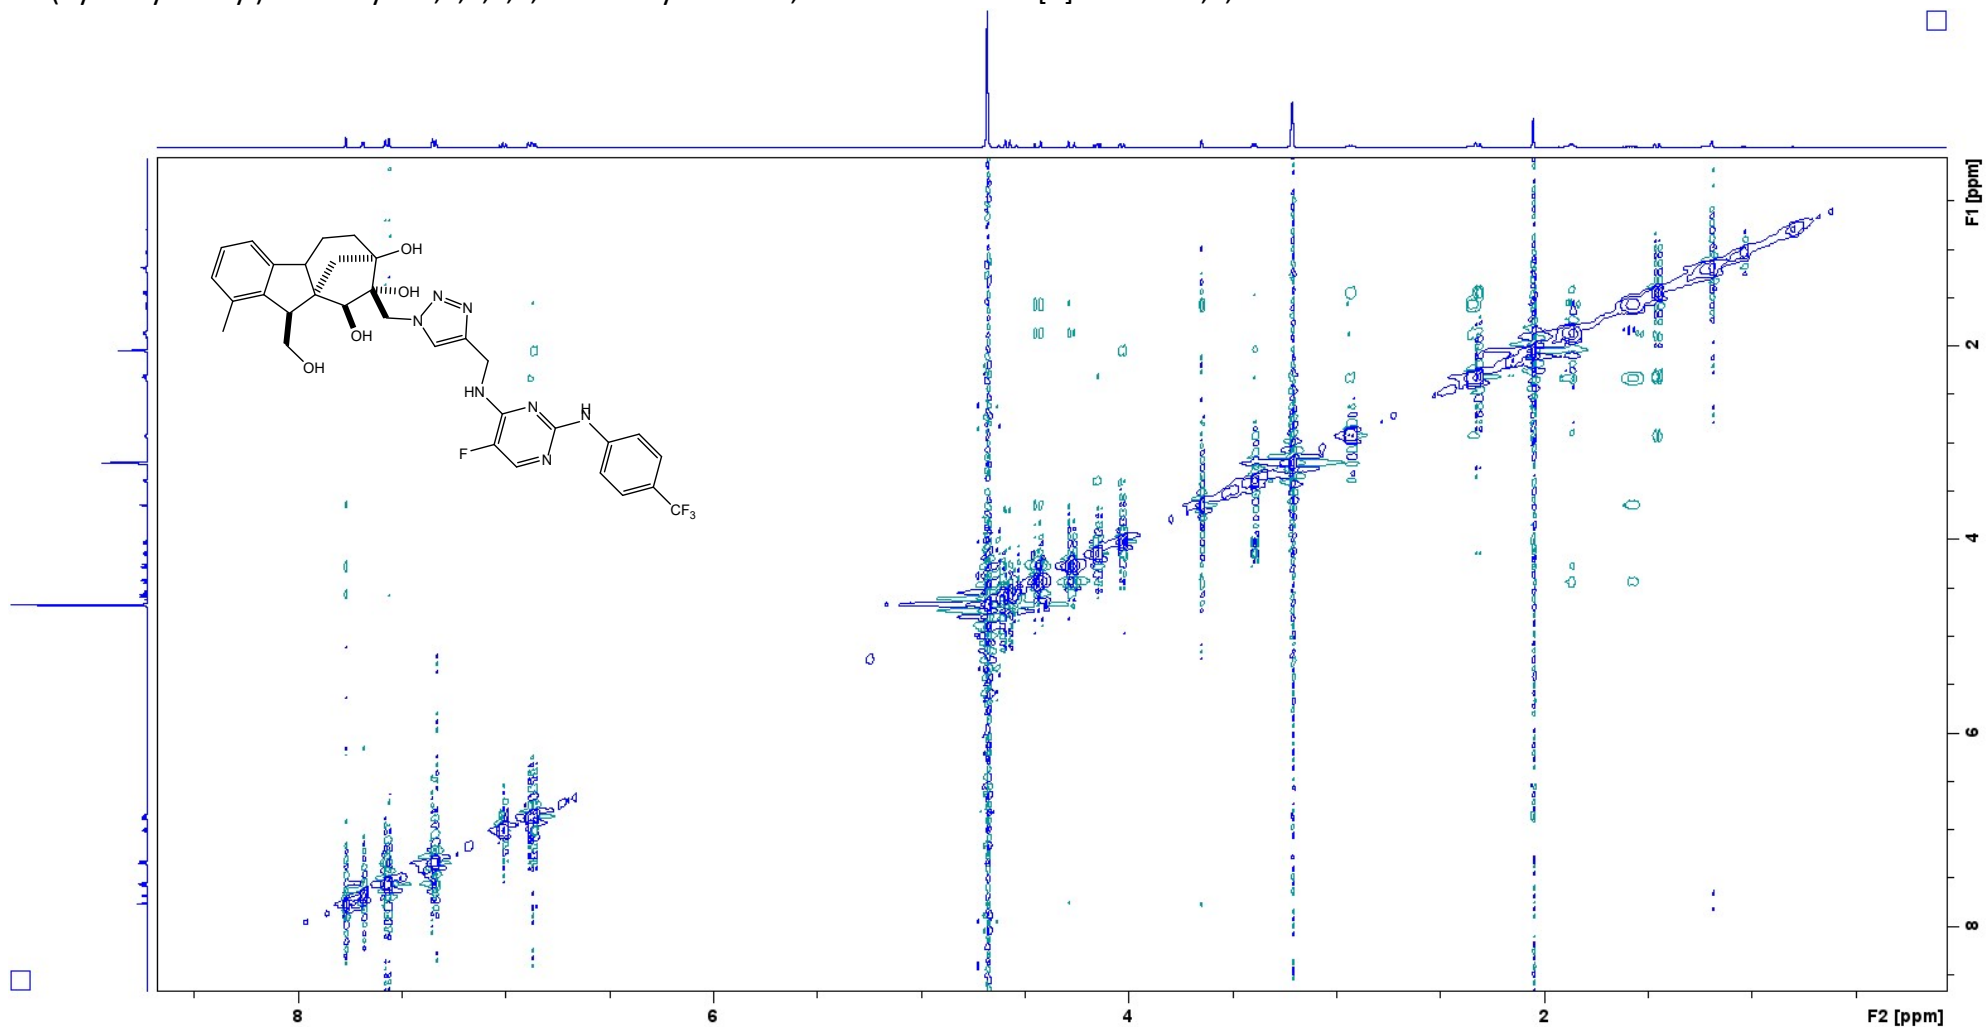

HSQC of (7*S*,8*R*,9*S*,9*aR*,10*S*)-8-((4-(((5-Fluoro-2-((4-(trifluoromethyl)phenyl)amino)pyrimidin-4-yl)amino)methyl)-1*H*-1,2,3-triazol-1-yl)methyl)-10-(hydroxymethyl)-1-methyl-4*b*,5,6,8,9,10-hexahydro-7*H*-7,9*a*-methanobenzo[*a*]azulene-7,8,9-triol **38**

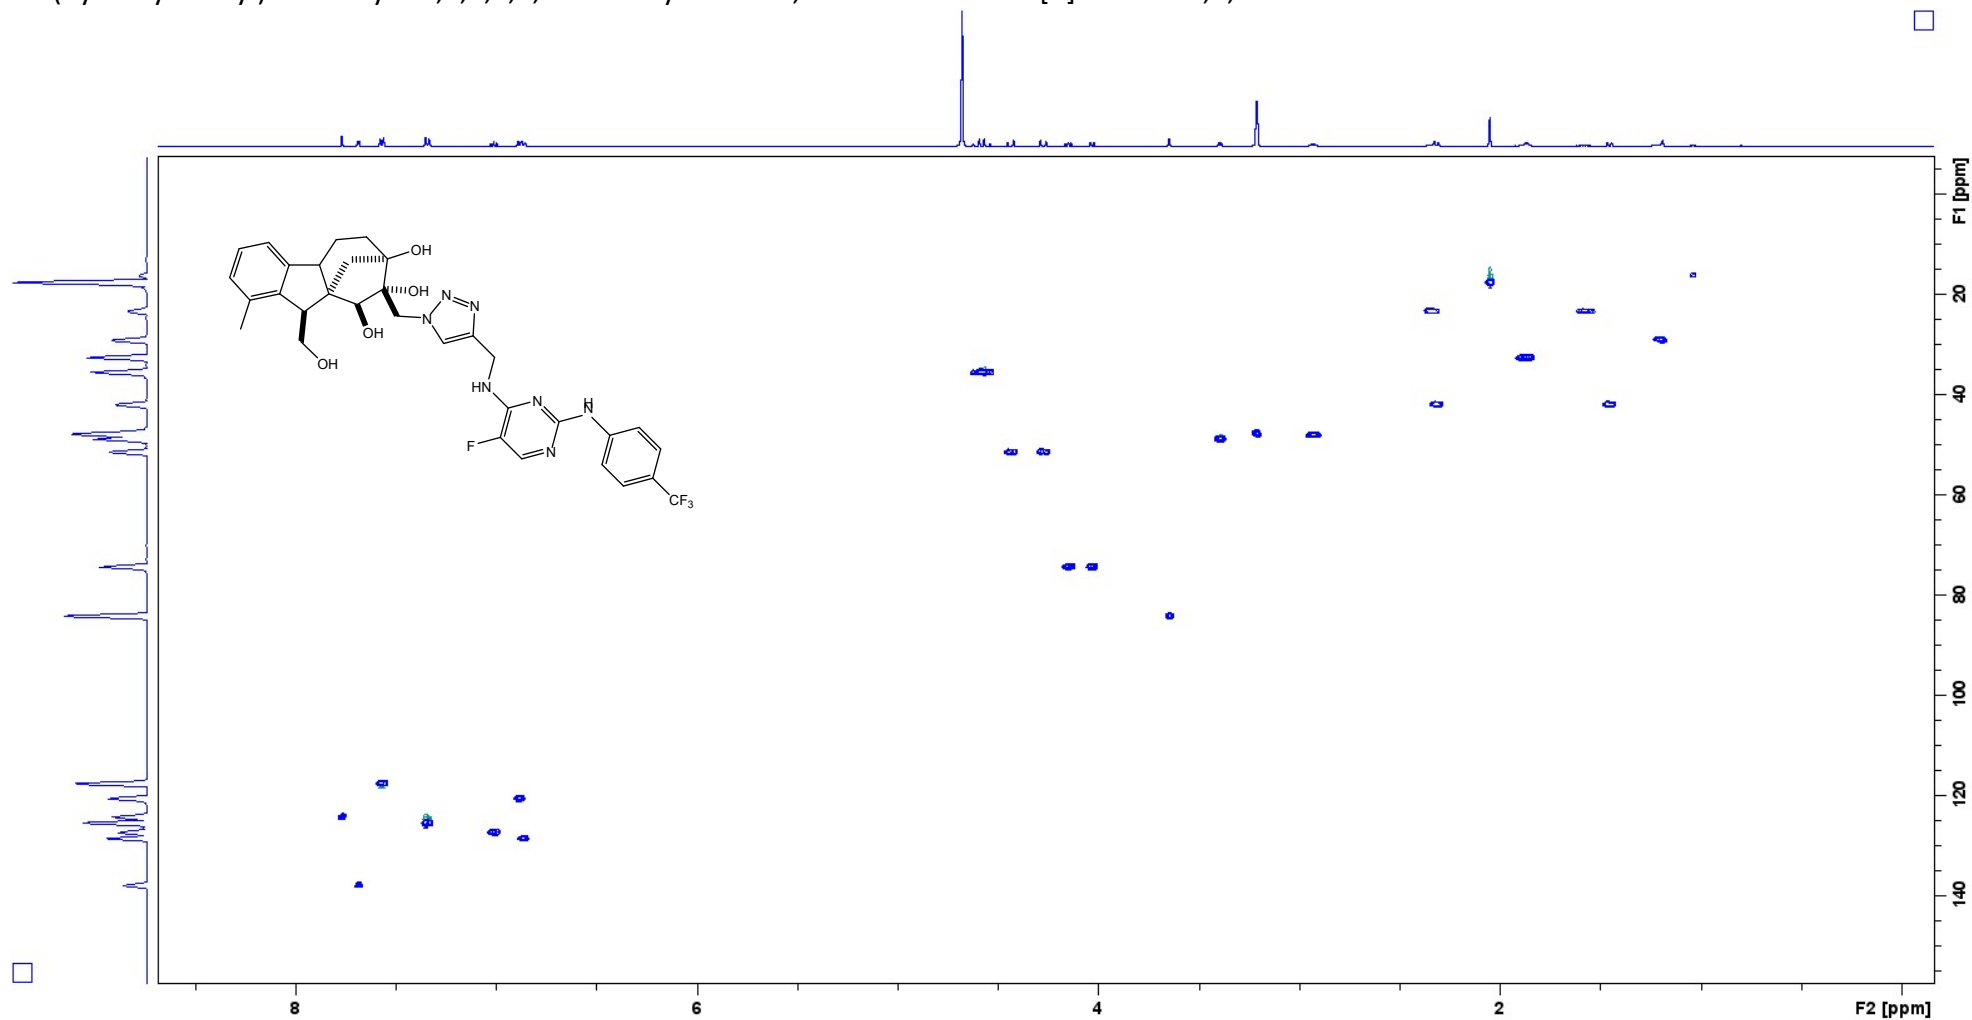



HMBC of (7S,8R,9S,9aR,10S)-8-(((5-Fluoro-2-((4-(trifluoromethyl)phenyl)amino)pyrimidin-4-yl)amino)methyl)-1H-1,2,3-triazol-1-yl)methyl)-10-(hydroxymethyl)-1-methyl-4b,5,6,8,9,10-hexahydro-7H-7,9a-methanobenzo[a]azulene-7,8,9-triol **38**

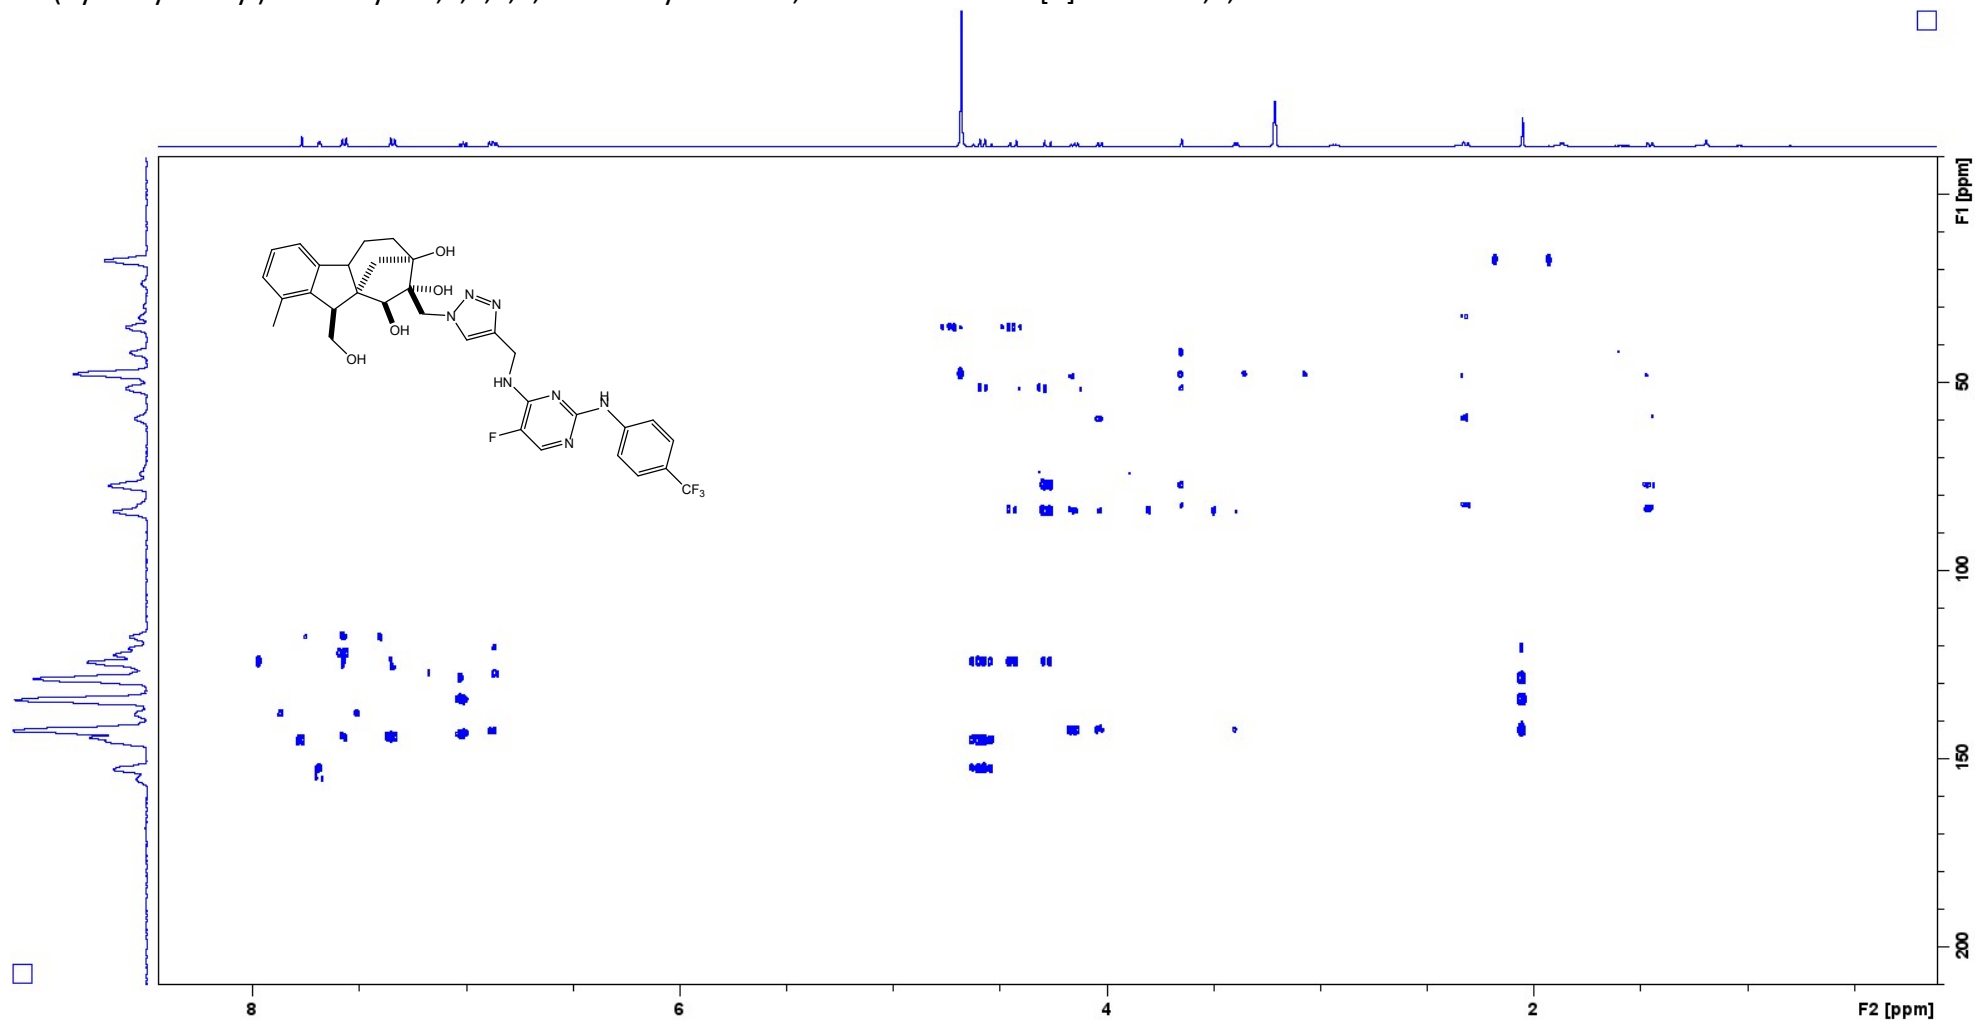

<sup>19</sup>F J-MOD NMR (470 MHz) of (7*S*,8*R*,9*S*,9*aR*,10*S*)-8-((4-(((5-Fluoro-2-((4-(trifluoromethyl)phenyl)amino)pyrimidin-4-yl)amino)methyl)-1*H*-1,2,3-triazol-1-yl)methyl)-10-(hydroxymethyl)-1-methyl-4*b*,5,6,8,9,10-hexahydro-7*H*-7,9*a*-methanobenzo[*a*]azulene-7,8,9-triol **38**

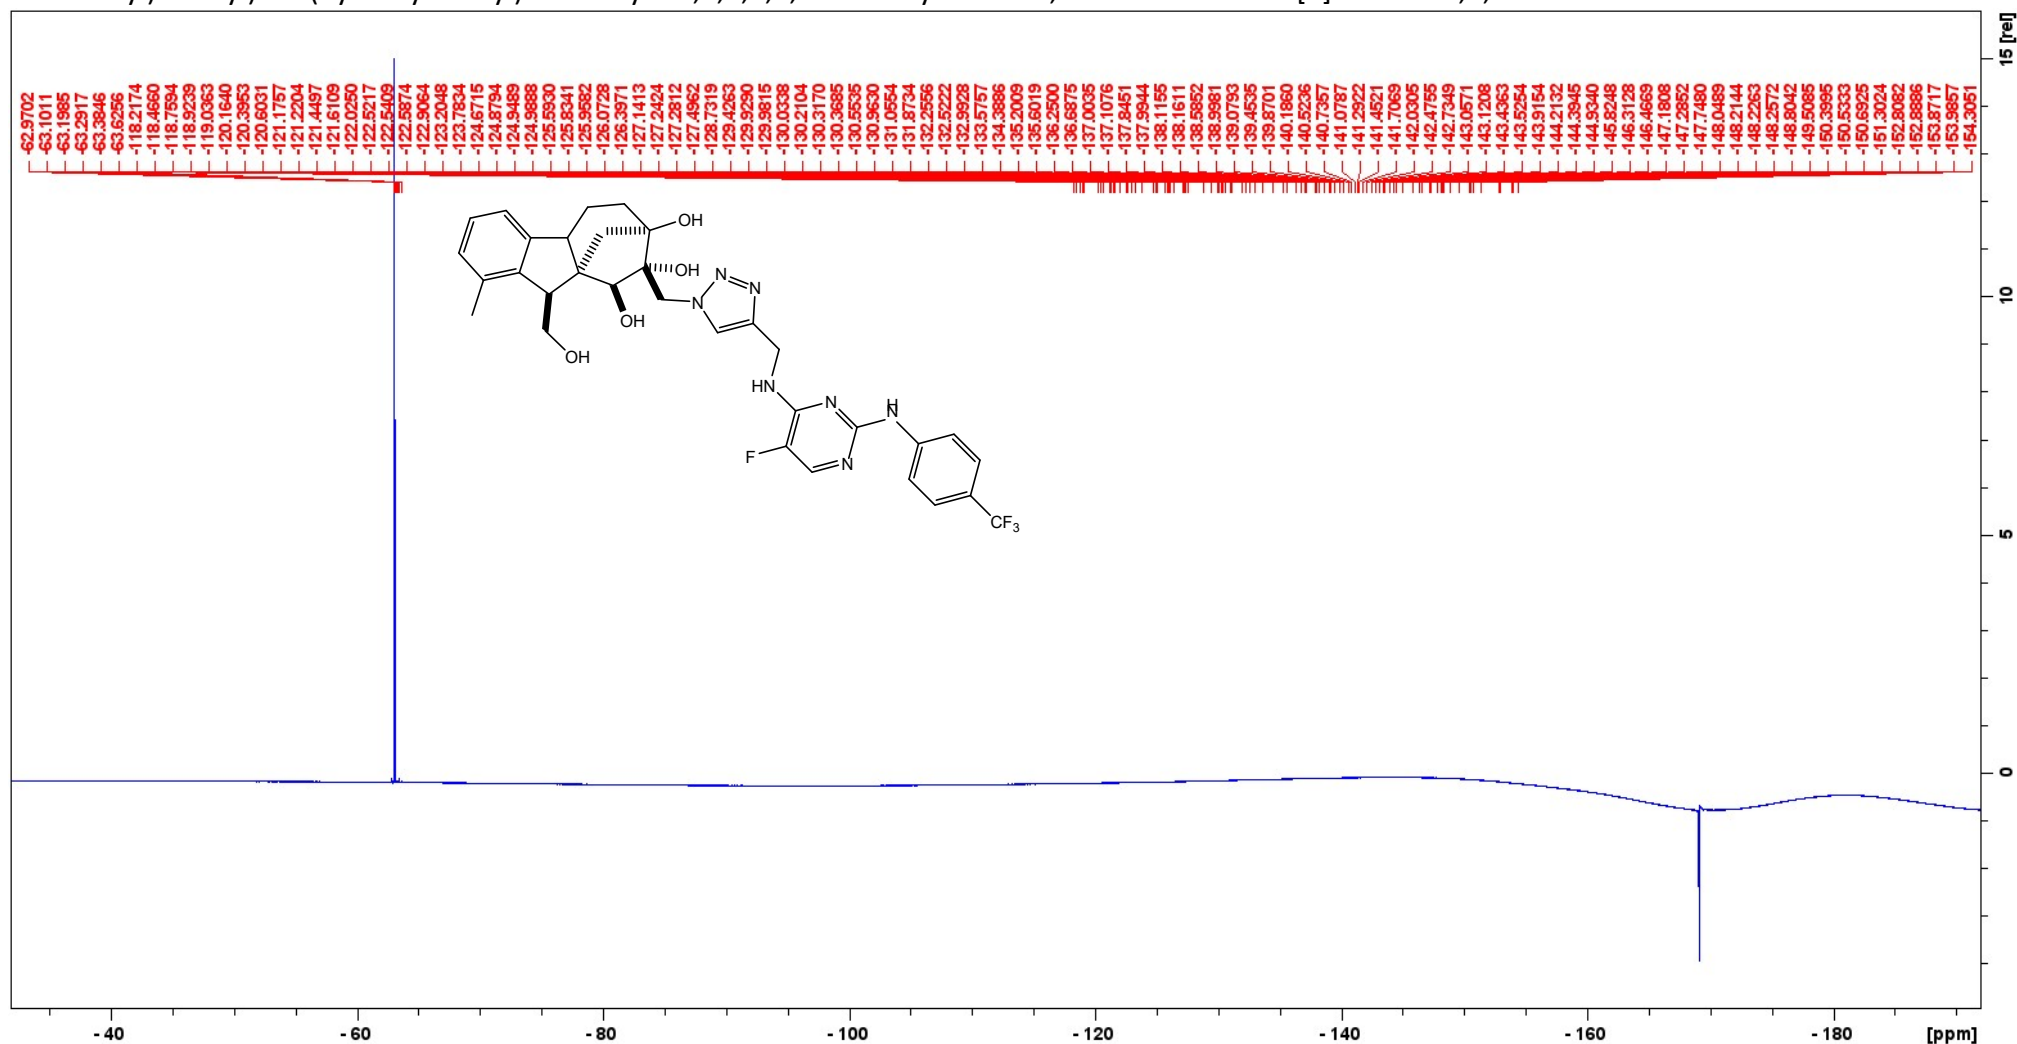

<sup>1</sup>H-NMR (500 MHz) of (7*S*,8*R*,9*S*,9*aR*,10*S*)-8-(((5-chloro-2-((4-(trifluoromethyl)phenyl)amino)pyrimidin-4-yl)amino)methyl)-1*H*-1,2,3-triazol-1-yl)methyl)-10-(hydroxymethyl)-1-methyl-4*b*,5,6,8,9,10-hexahydro-7*H*-7,9*a*-methanobenzo[*a*]azulene-7,8,9-triol **39**

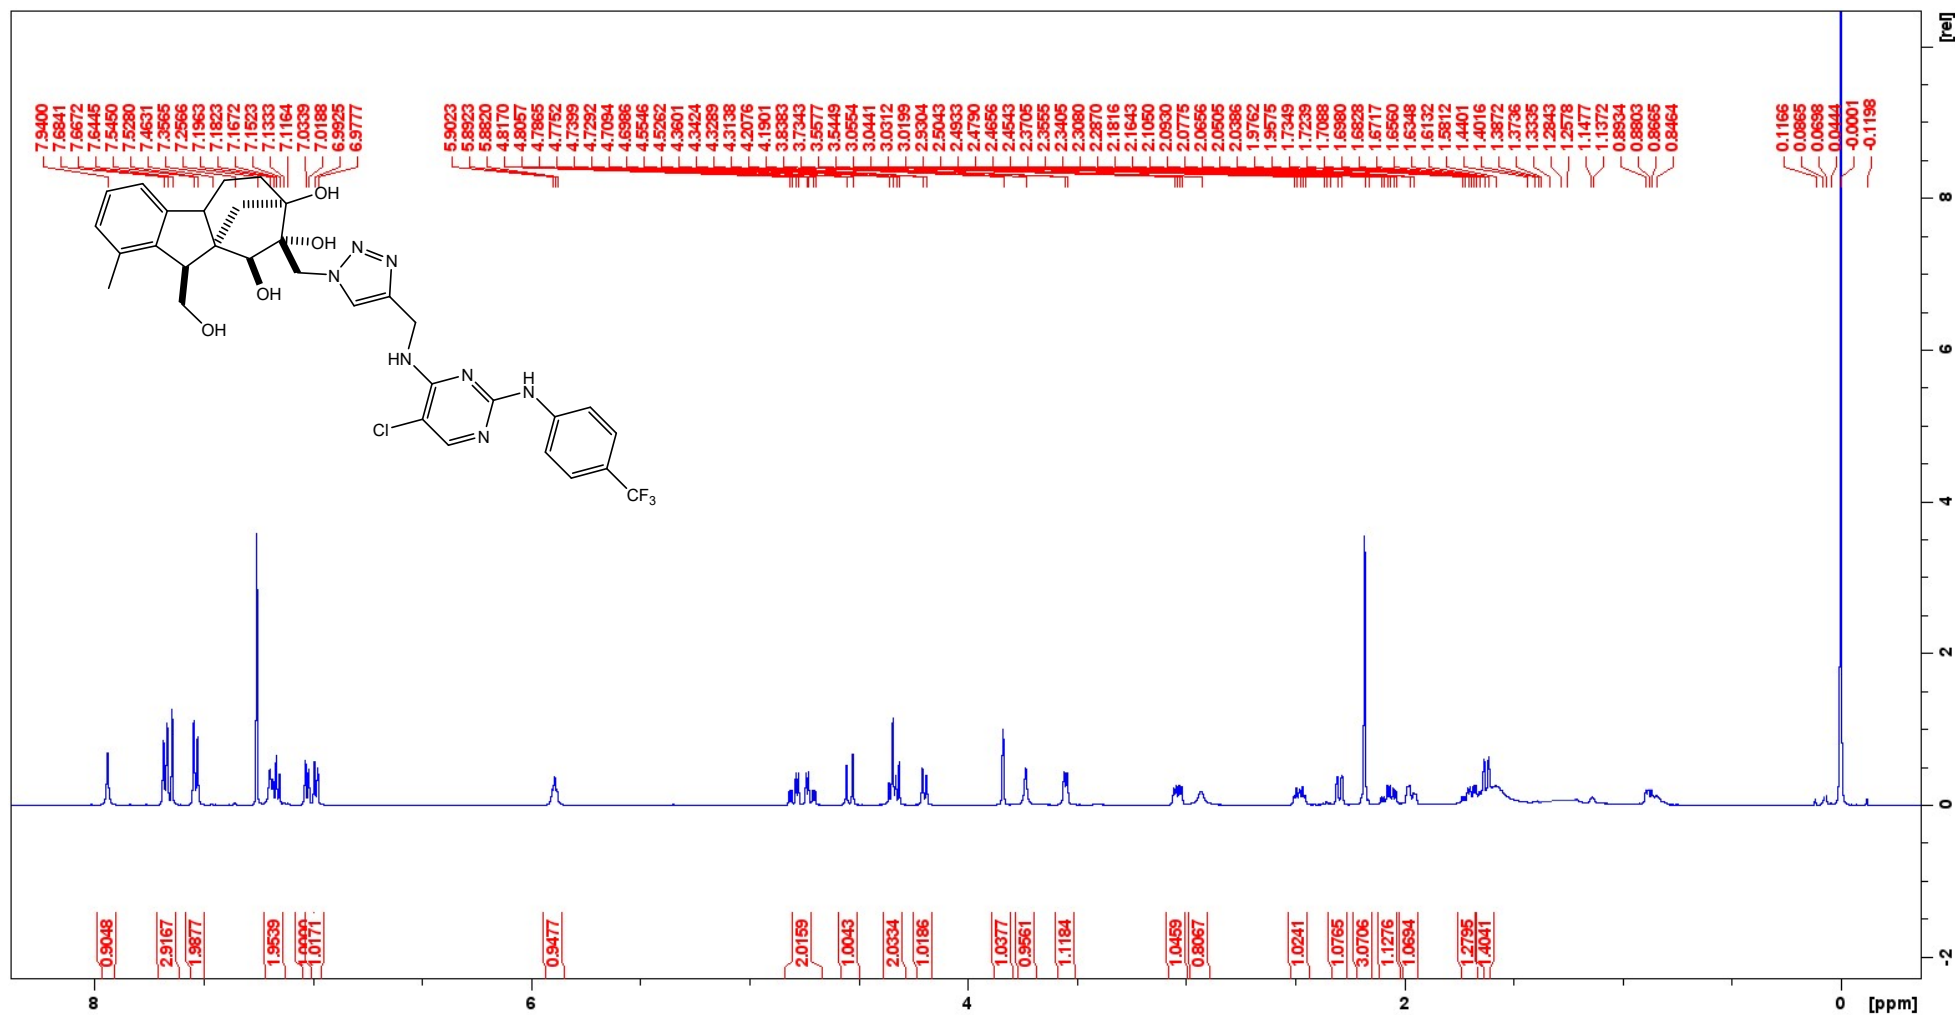

<sup>13</sup>C{<sup>1</sup>H} J-MOD NMR (125 MHz) of (7S,8R,9S,9aR,10S)-8-((4-(((5-chloro-2-((4-(trifluoromethyl)phenyl)amino)pyrimidin-4-yl)amino)methyl)-1H-1,2,3-triazol-1-yl)methyl)-10-(hydroxymethyl)-1-methyl-4b,5,6,8,9,10-hexahydro-7H-7,9a-methanobenzo[a]azulene-7,8,9-triol **39**

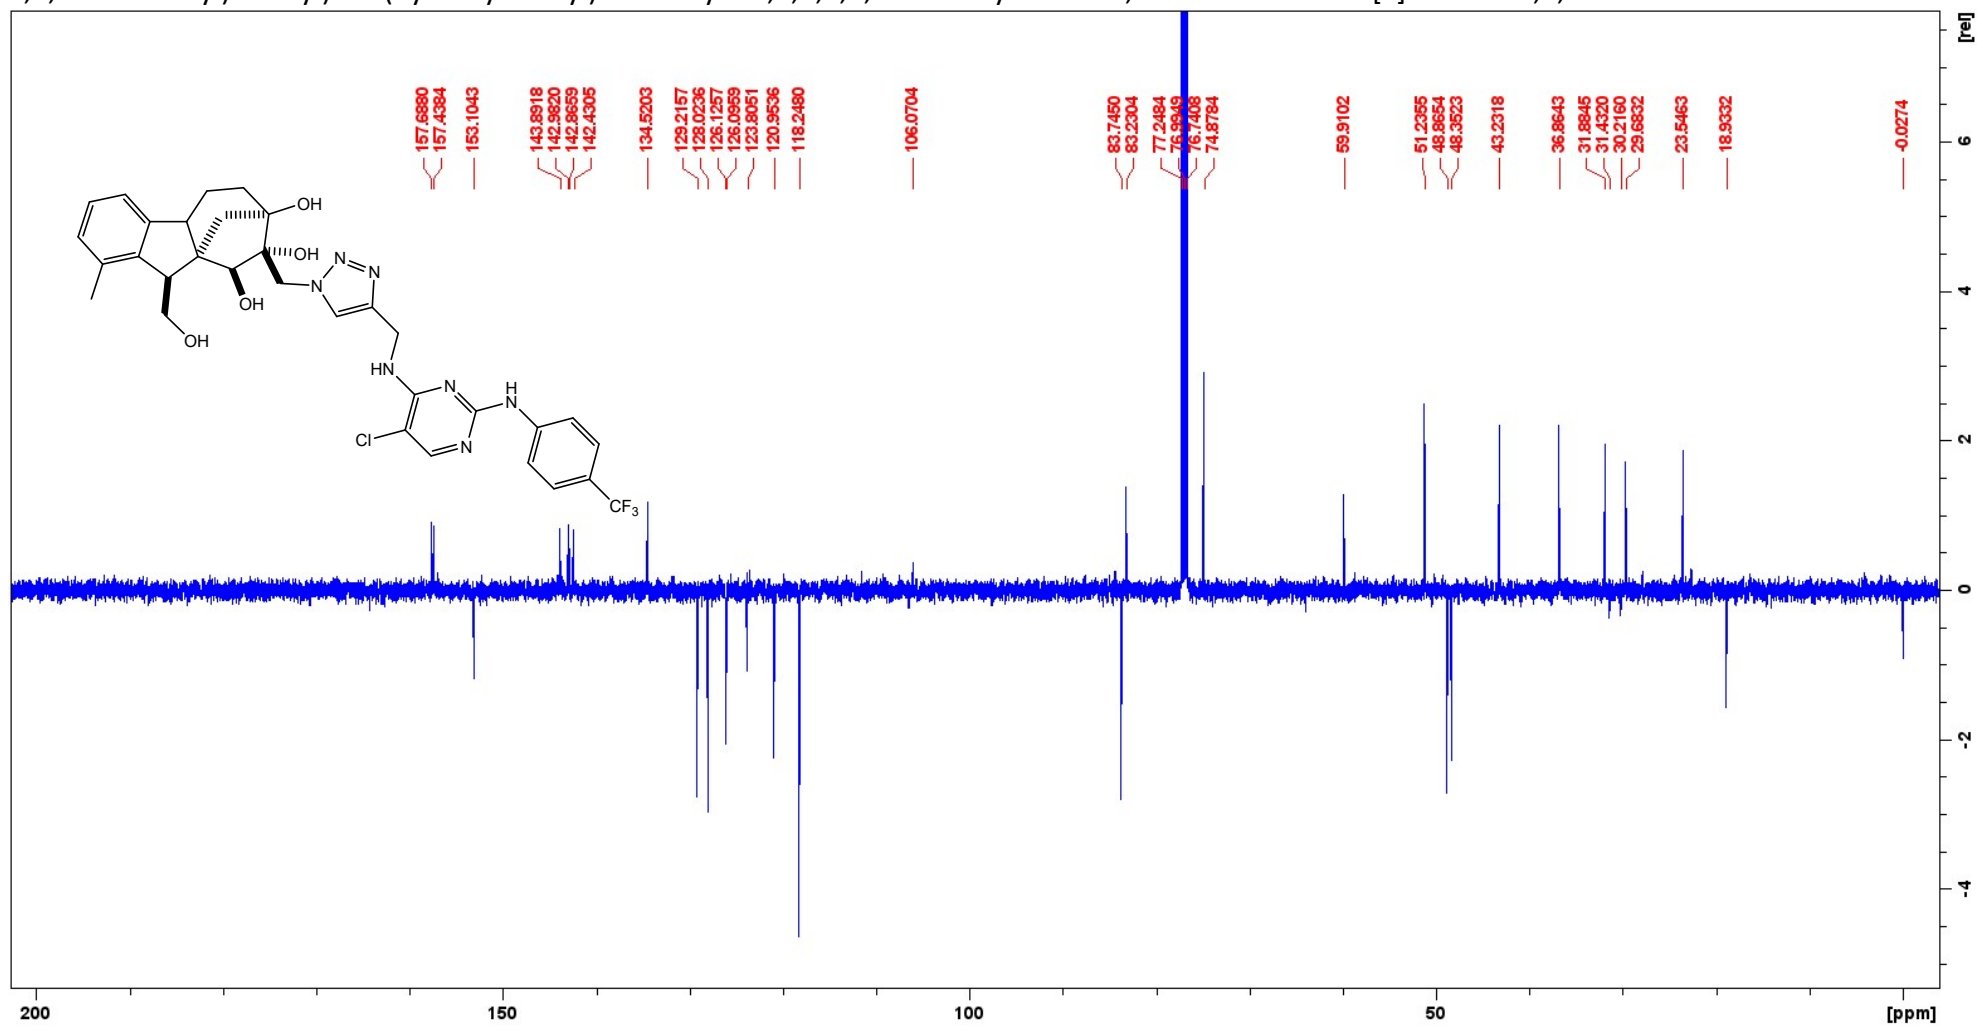

COSY of (7*S*,8*R*,9*S*,9*aR*,10*S*)-8-((4-(((5-chloro-2-((4-(trifluoromethyl)phenyl)amino)pyrimidin-4-yl)amino)methyl)-1*H*-1,2,3-triazol-1-yl)methyl)-10-(hydroxymethyl)-1-methyl-4*b*,5,6,8,9,10-hexahydro-7*H*-7,9*a*-methanobenzo[*a*]azulene-7,8,9-triol **39**

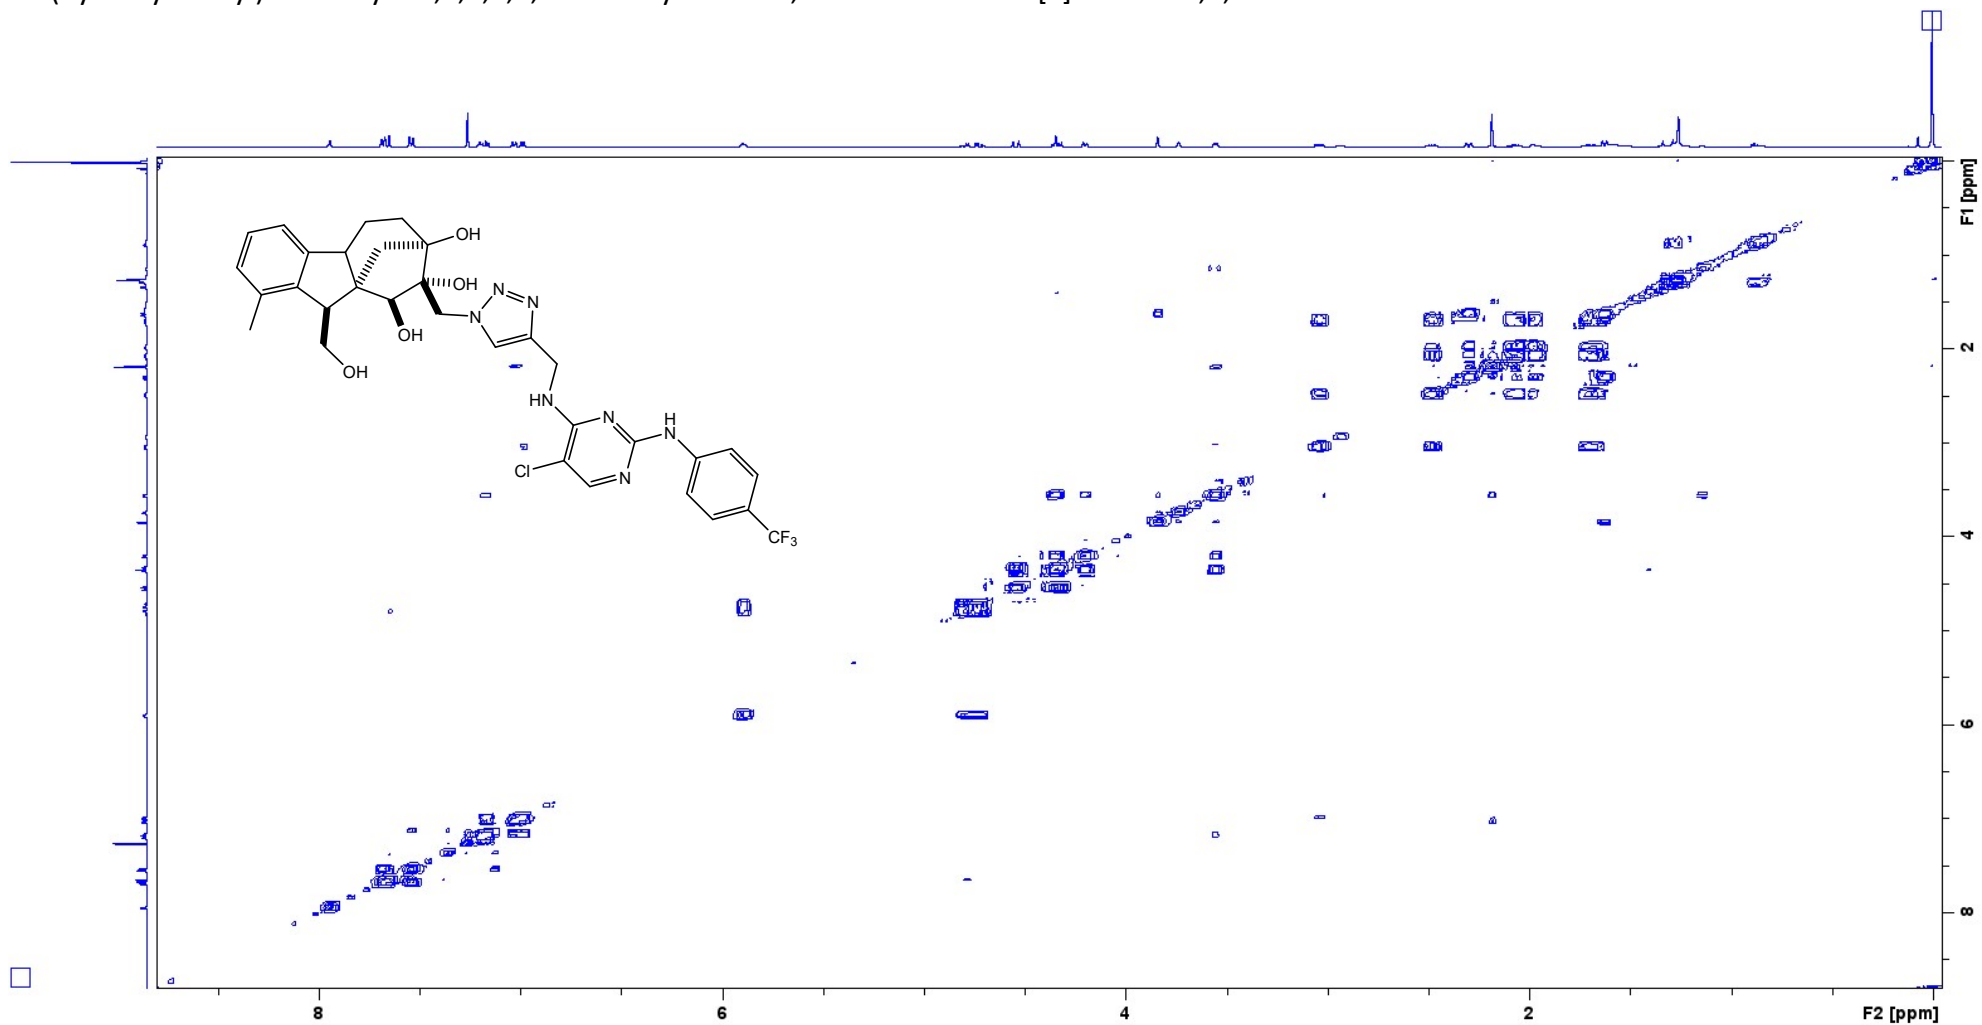

NOESY of (7*S*,8*R*,9*S*,9*aR*,10*S*)-8-((4-(((5-chloro-2-((4-(trifluoromethyl)phenyl)amino)pyrimidin-4-yl)amino)methyl)-1*H*-1,2,3-triazol-1-yl)methyl)-10-(hydroxymethyl)-1-methyl-4*b*,5,6,8,9,10-hexahydro-7*H*-7,9*a*-methanobenzo[*a*]azulene-7,8,9-triol **39**

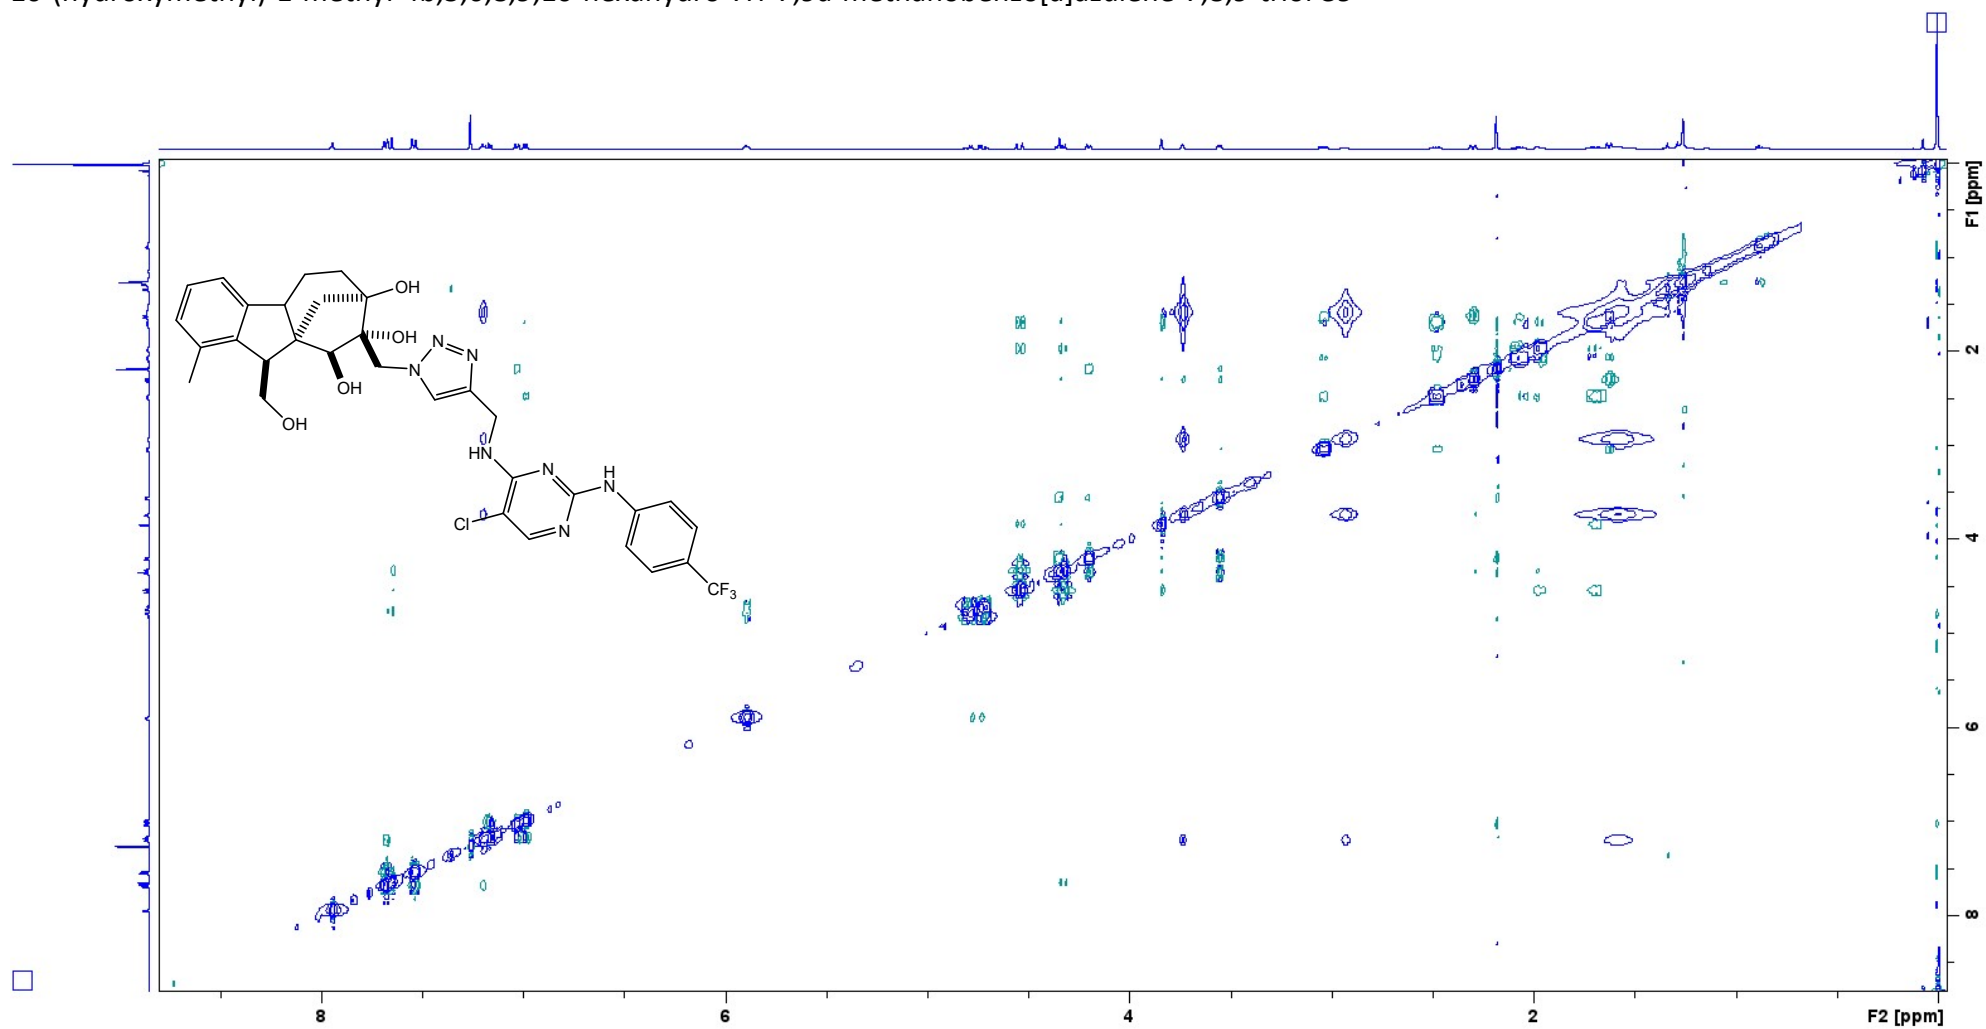

HSQC of (7*S*,8*R*,9*S*,9*aR*,10*S*)-8-((4-(((5-chloro-2-((4-(trifluoromethyl)phenyl)amino)pyrimidin-4-yl)amino)methyl)-1*H*-1,2,3-triazol-1-yl)methyl)-10-(hydroxymethyl)-1-methyl-4*b*,5,6,8,9,10-hexahydro-7*H*-7,9*a*-methanobenzo[*a*]azulene-7,8,9-triol **39**

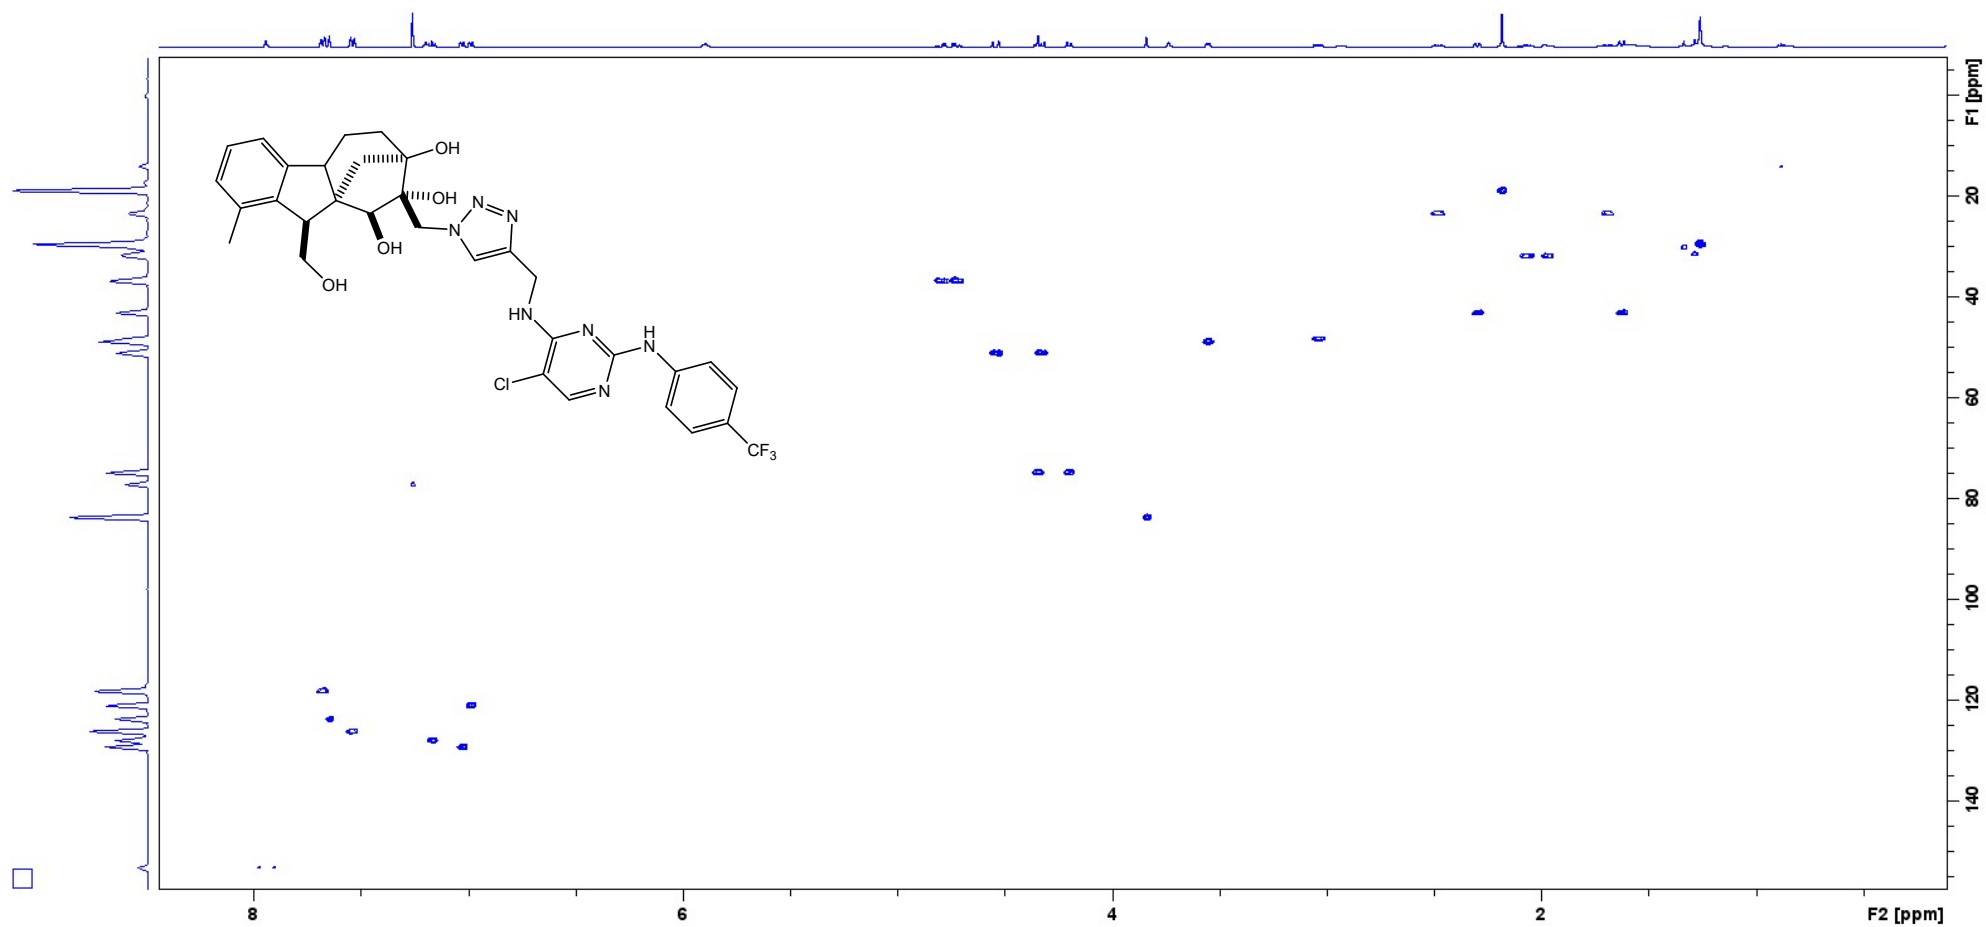

HMBC of (7*S*,8*R*,9*S*,9*aR*,10*S*)-8-((4-(((5-chloro-2-((4-(trifluoromethyl)phenyl)amino)pyrimidin-4-yl)amino)methyl)-1*H*-1,2,3-triazol-1-yl)methyl)-10-(hydroxymethyl)-1-methyl-4*b*,5,6,8,9,10-hexahydro-7*H*-7,9*a*-methanobenzo[*a*]azulene-7,8,9-triol **39**

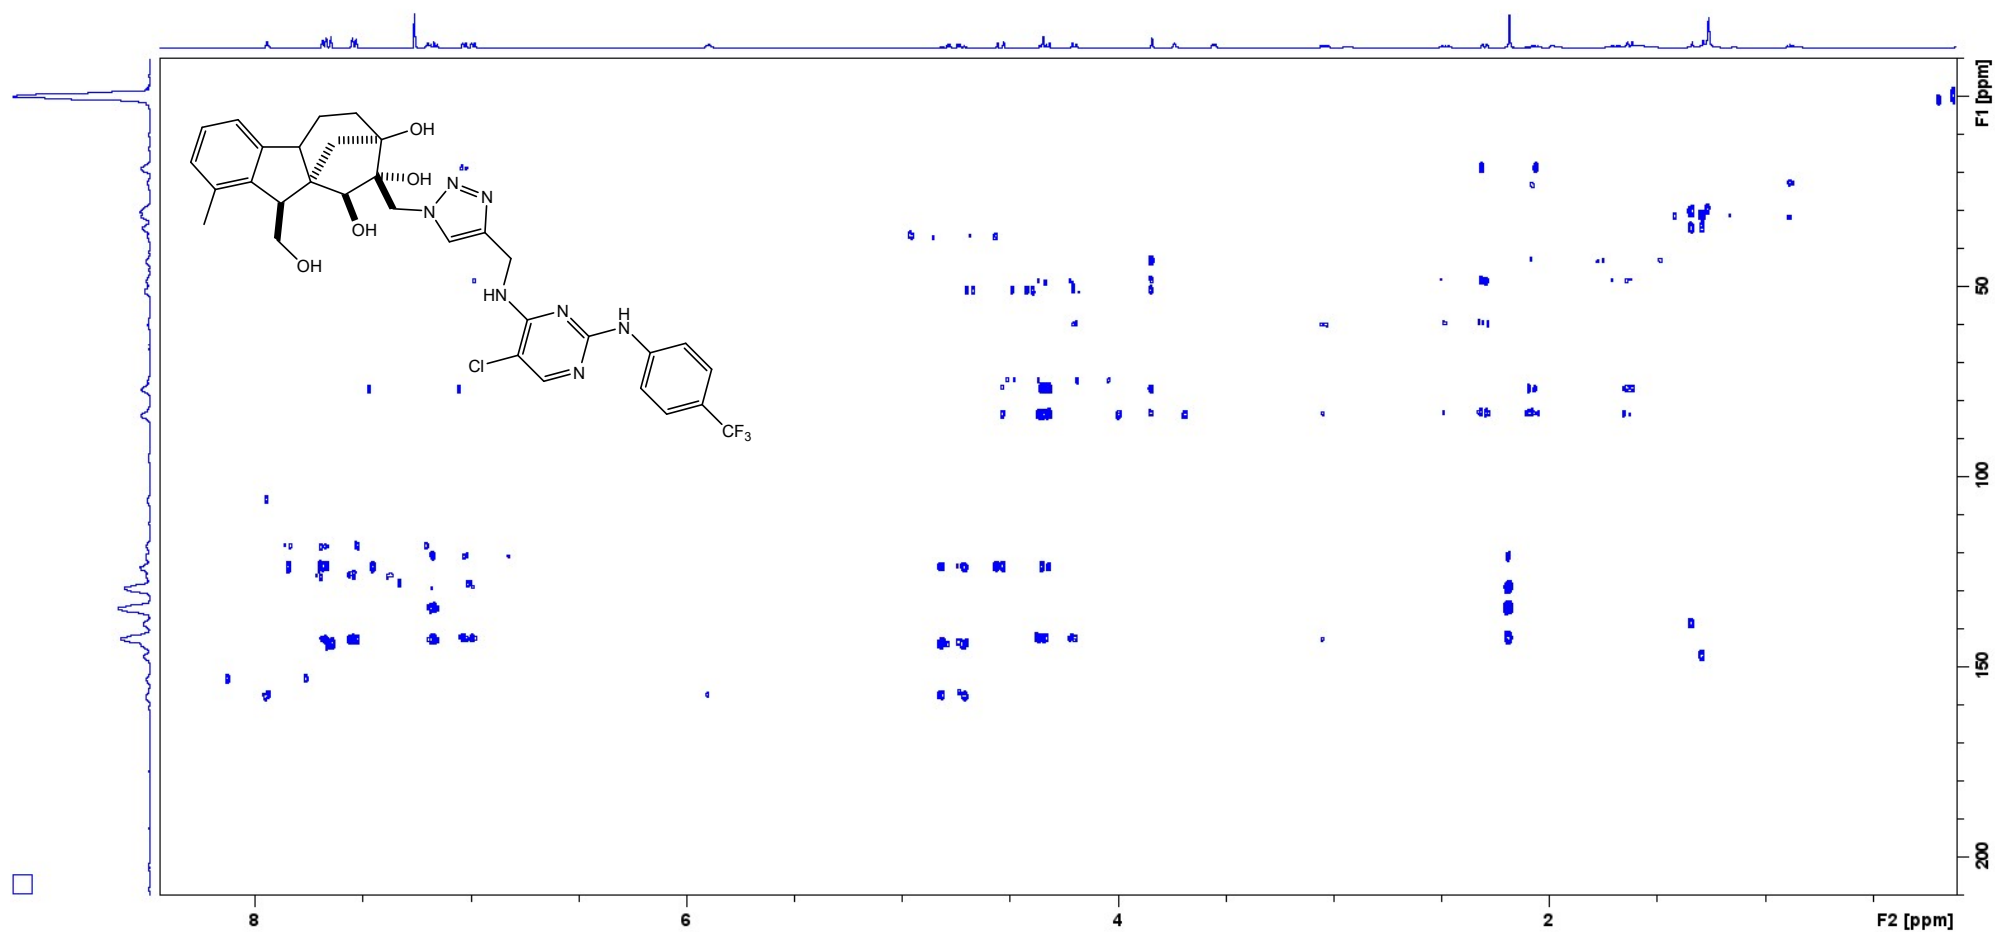



<sup>19</sup>F J-MOD NMR (470 MHz) of (7S,8R,9S,9aR,10S)-8-((4-(((5-chloro-2-((4-(trifluoromethyl)phenyl)amino)pyrimidin-4-yl)amino)methyl)-1H-1,2,3-triazol-1-yl)methyl)-10-(hydroxymethyl)-1-methyl-4b,5,6,8,9,10-hexahydro-7H-7,9a-methanobenzo[a]azulene-7,8,9-triol **39**

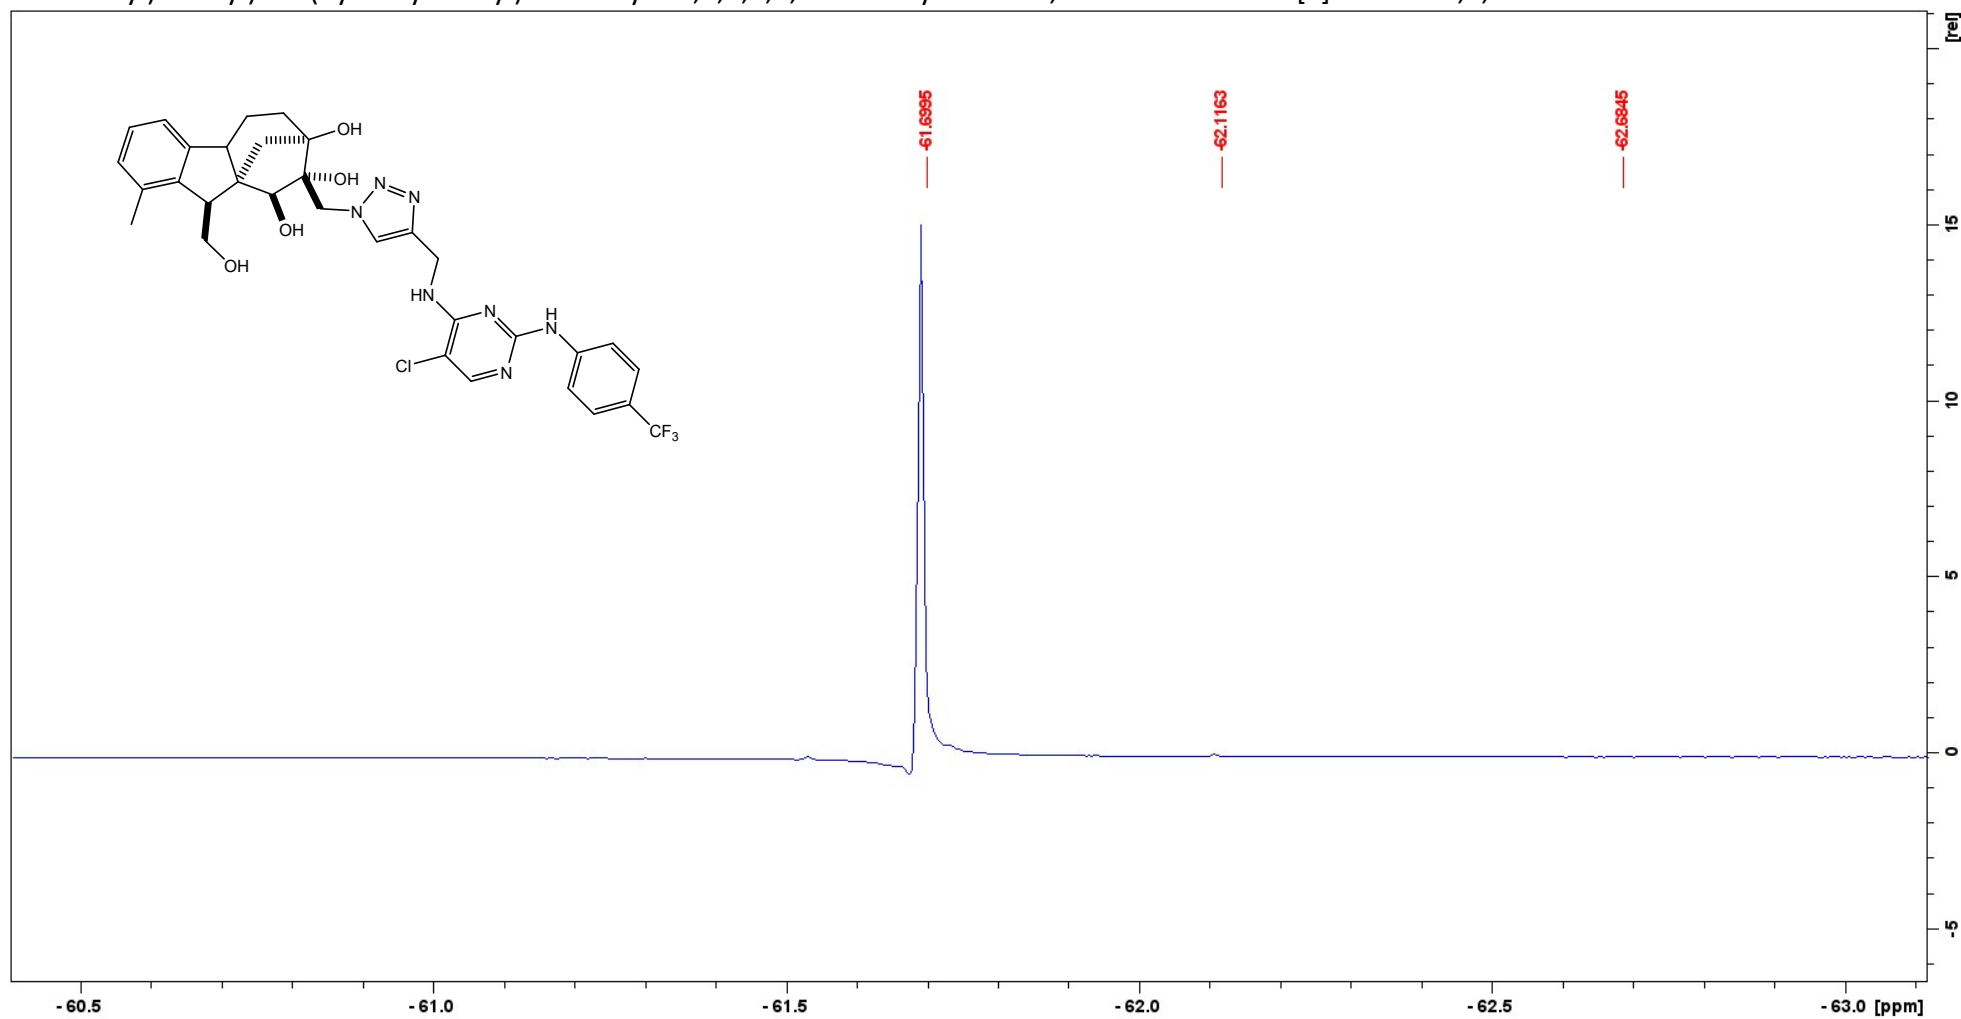

$^1\text{H-NMR}$  (500 MHz) of 1-((1-(((7S,8R,9S,9aR,10S)-7,8,9-Trihydroxy-10-(hydroxymethyl)-1-methyl-4b,6,7,8,9,10-hexahydro-5H-7,9a-methanobenzo[a]azulen-8-yl)methyl)-1H-1,2,3-triazol-4-yl)methyl)pyrimidine-2,4(1H,3H)-dione **40**

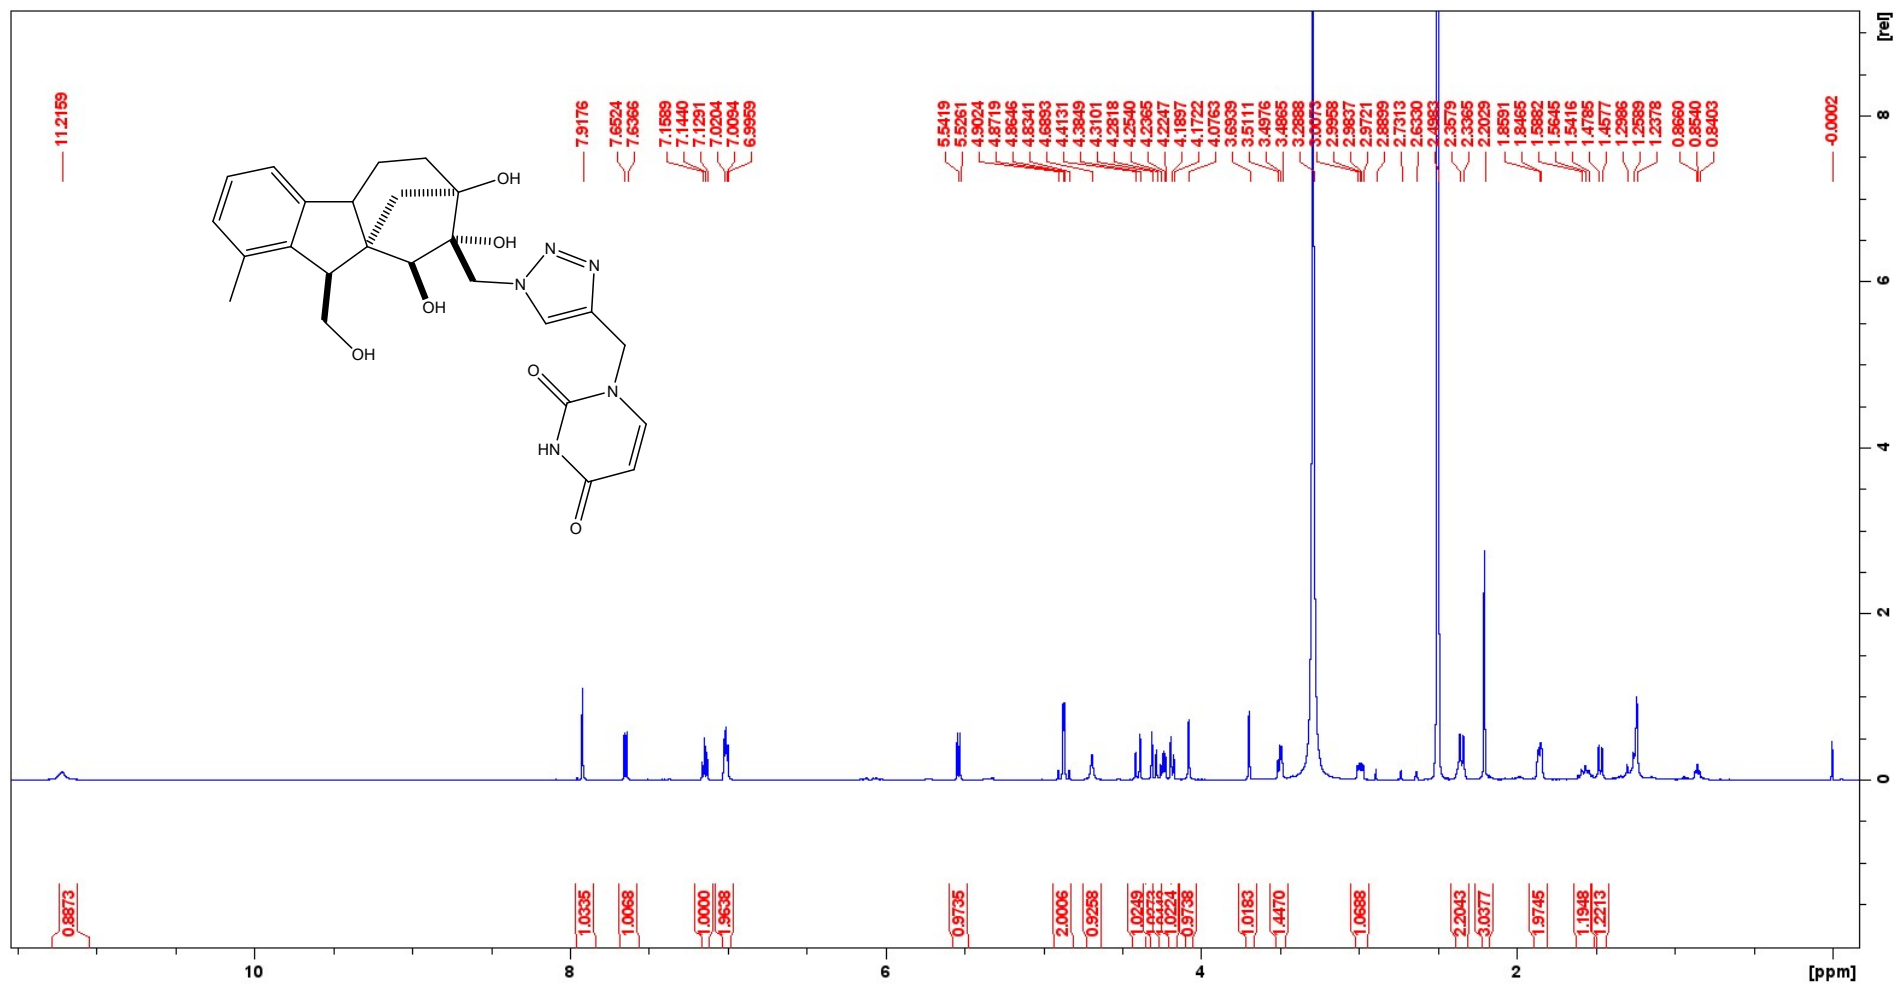

$^{13}\text{C}\{^1\text{H}\}$  J-MOD NMR (125 MHz) of 1-((1-(((7S,8R,9S,9aR,10S)-7,8,9-Trihydroxy-10-(hydroxymethyl)-1-methyl-4b,6,7,8,9,10-hexahydro-5H-7,9a-methanobenzo[a]azulen-8-yl)methyl)-1H-1,2,3-triazol-4-yl)methyl)pyrimidine-2,4(1H,3H)-dione **40**

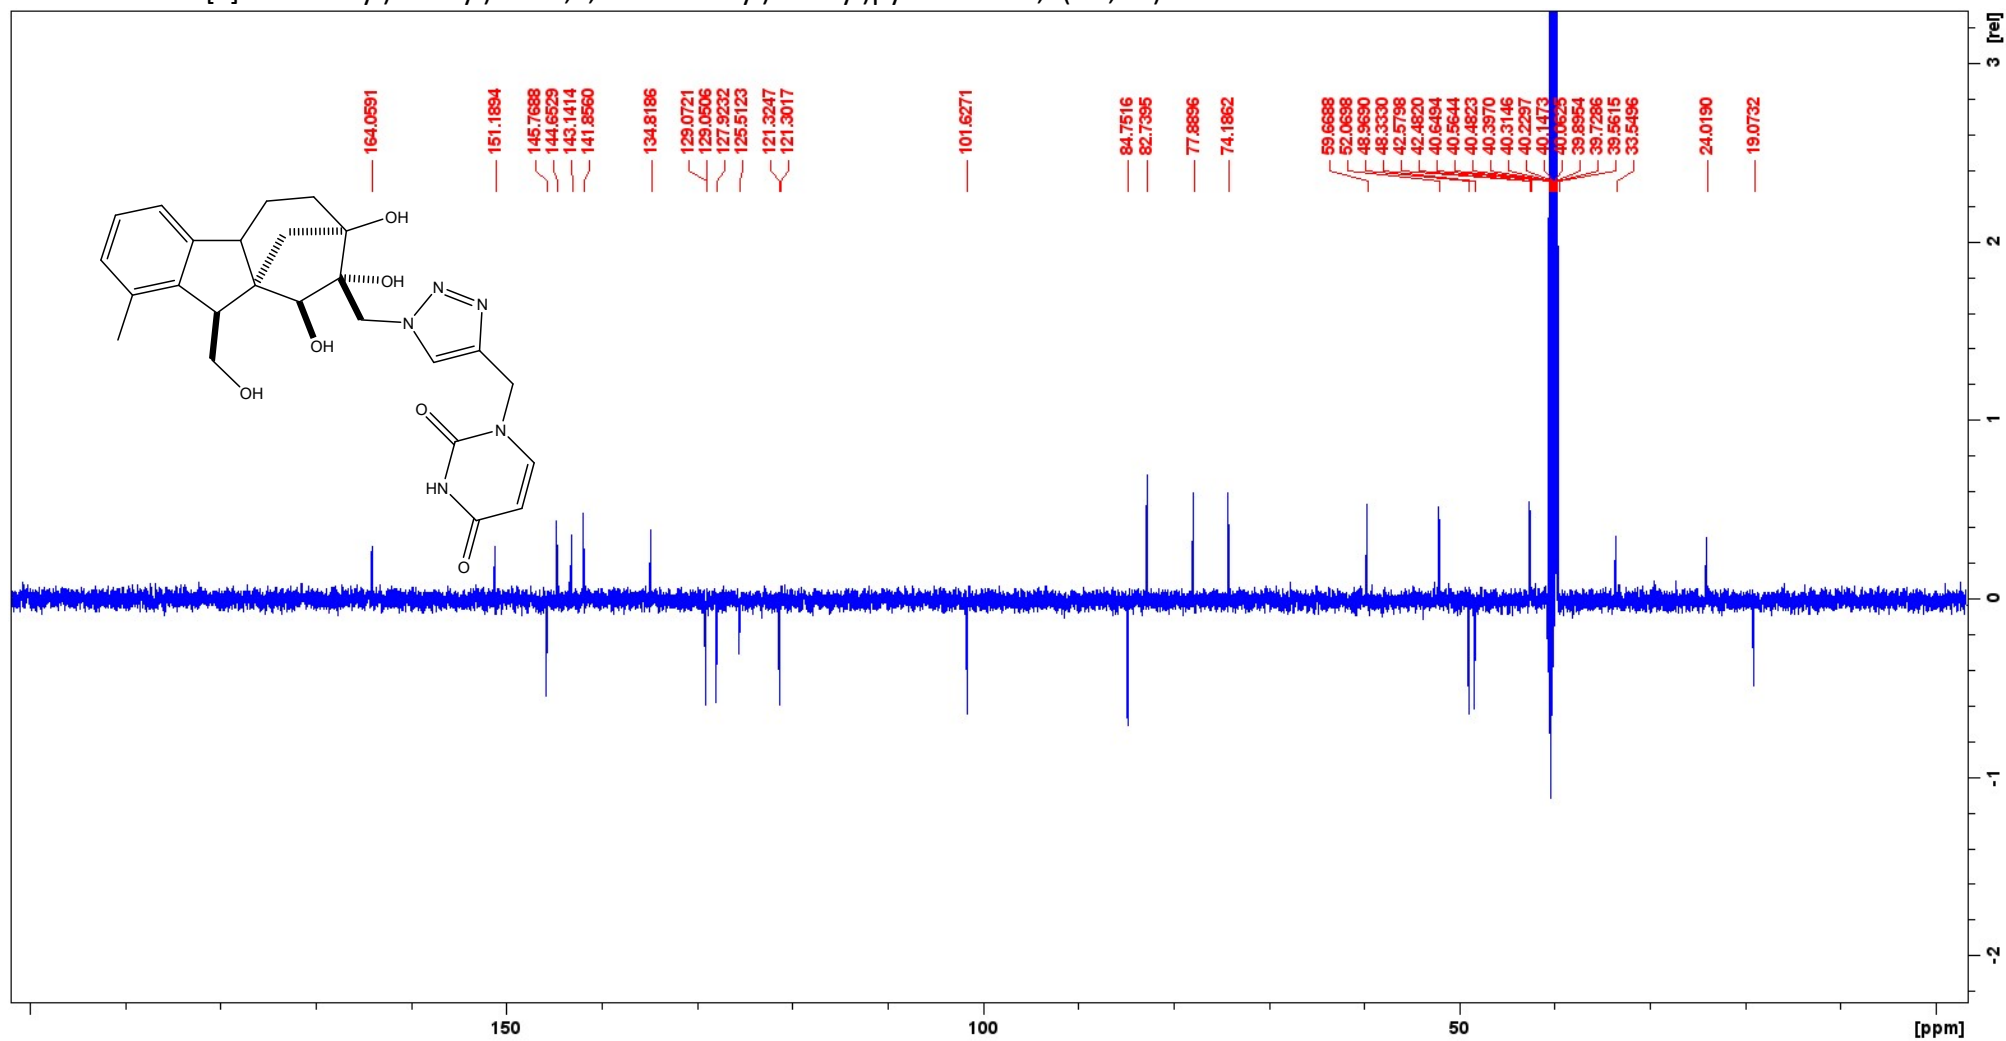

COSY of 1-((1-(((7S,8R,9S,9aR,10S)-7,8,9-Trihydroxy-10-(hydroxymethyl)-1-methyl-4b,6,7,8,9,10-hexahydro-5H-7,9a-methanobenzo[a]azulen-8-yl)methyl)-1H-1,2,3-triazol-4-yl)methyl)pyrimidine-2,4(1H,3H)-dione **40**

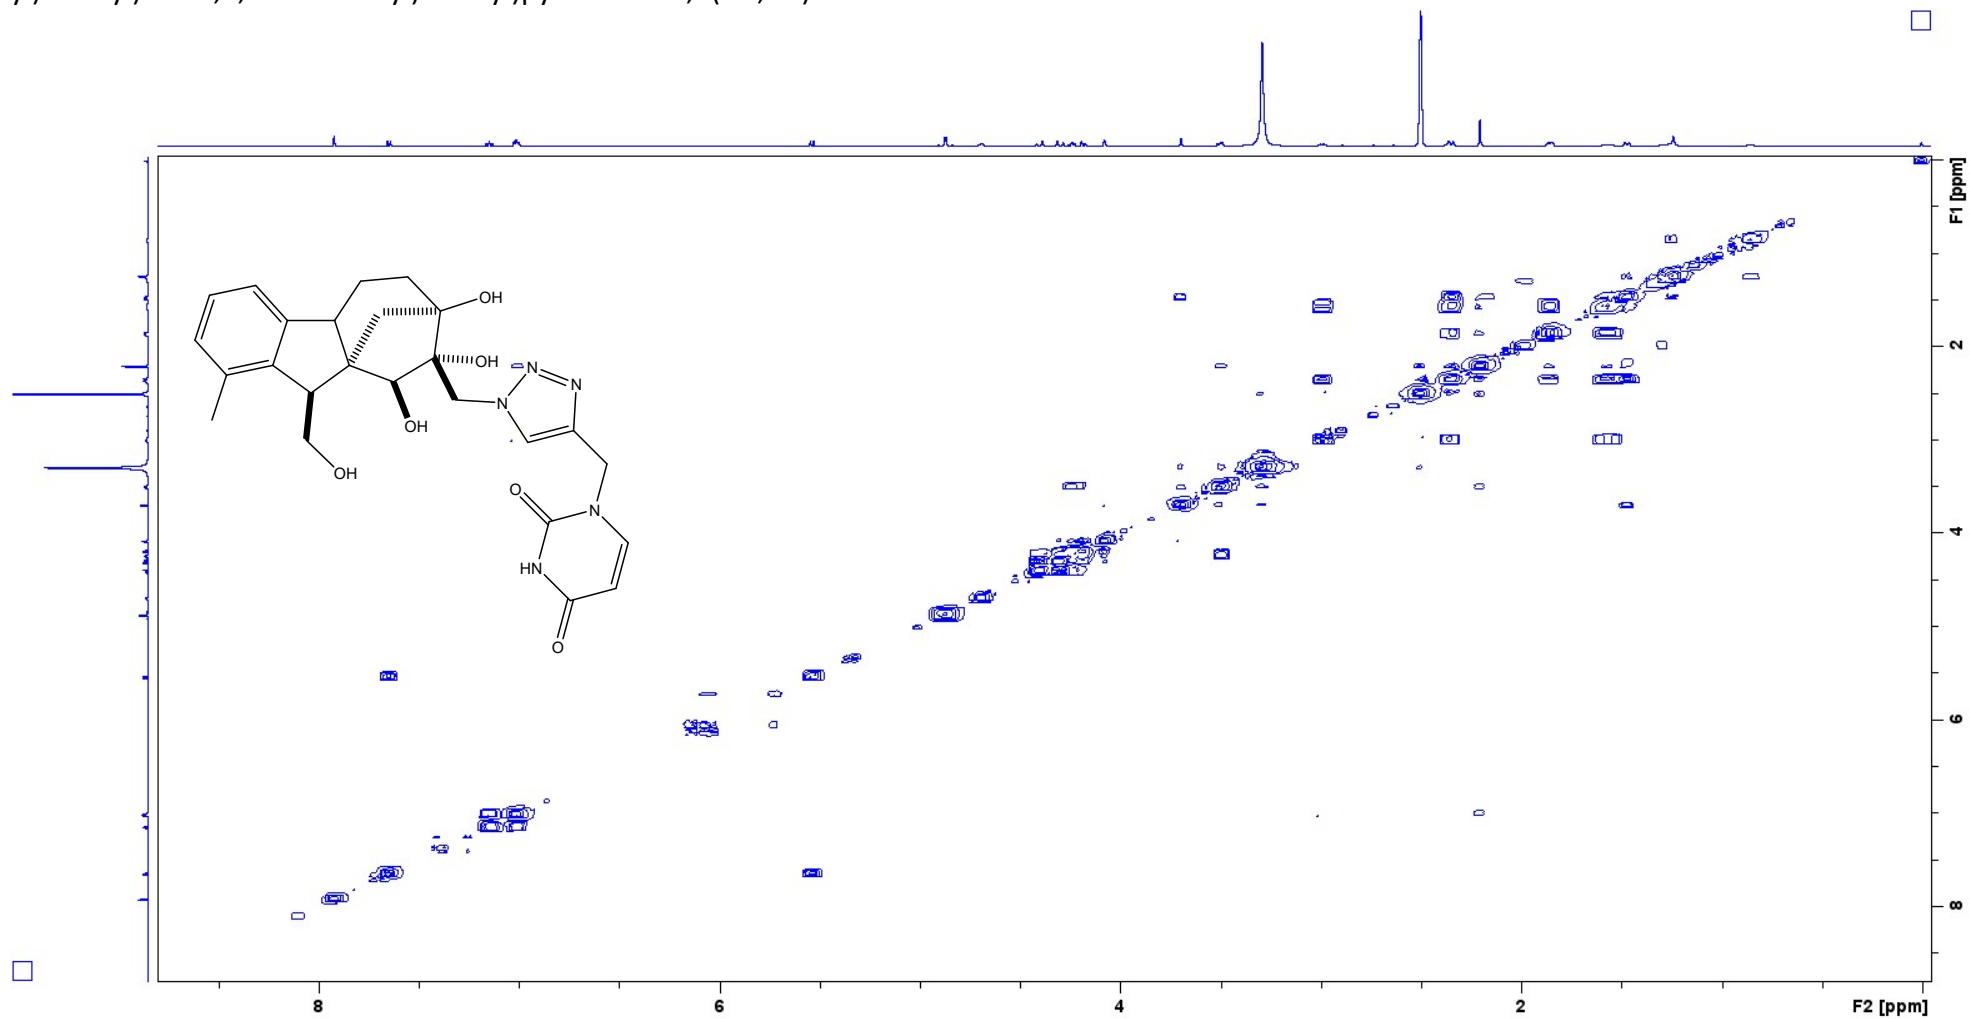

NOESY of 1-((1-(((7*S*,8*R*,9*S*,9*aR*,10*S*)-7,8,9-Trihydroxy-10-(hydroxymethyl)-1-methyl-4b,6,7,8,9,10-hexahydro-5*H*-7,9a-methanobenzo[*a*]azulen-8-yl)methyl)-1*H*-1,2,3-triazol-4-yl)methyl)pyrimidine-2,4(1*H*,3*H*)-dione **40**

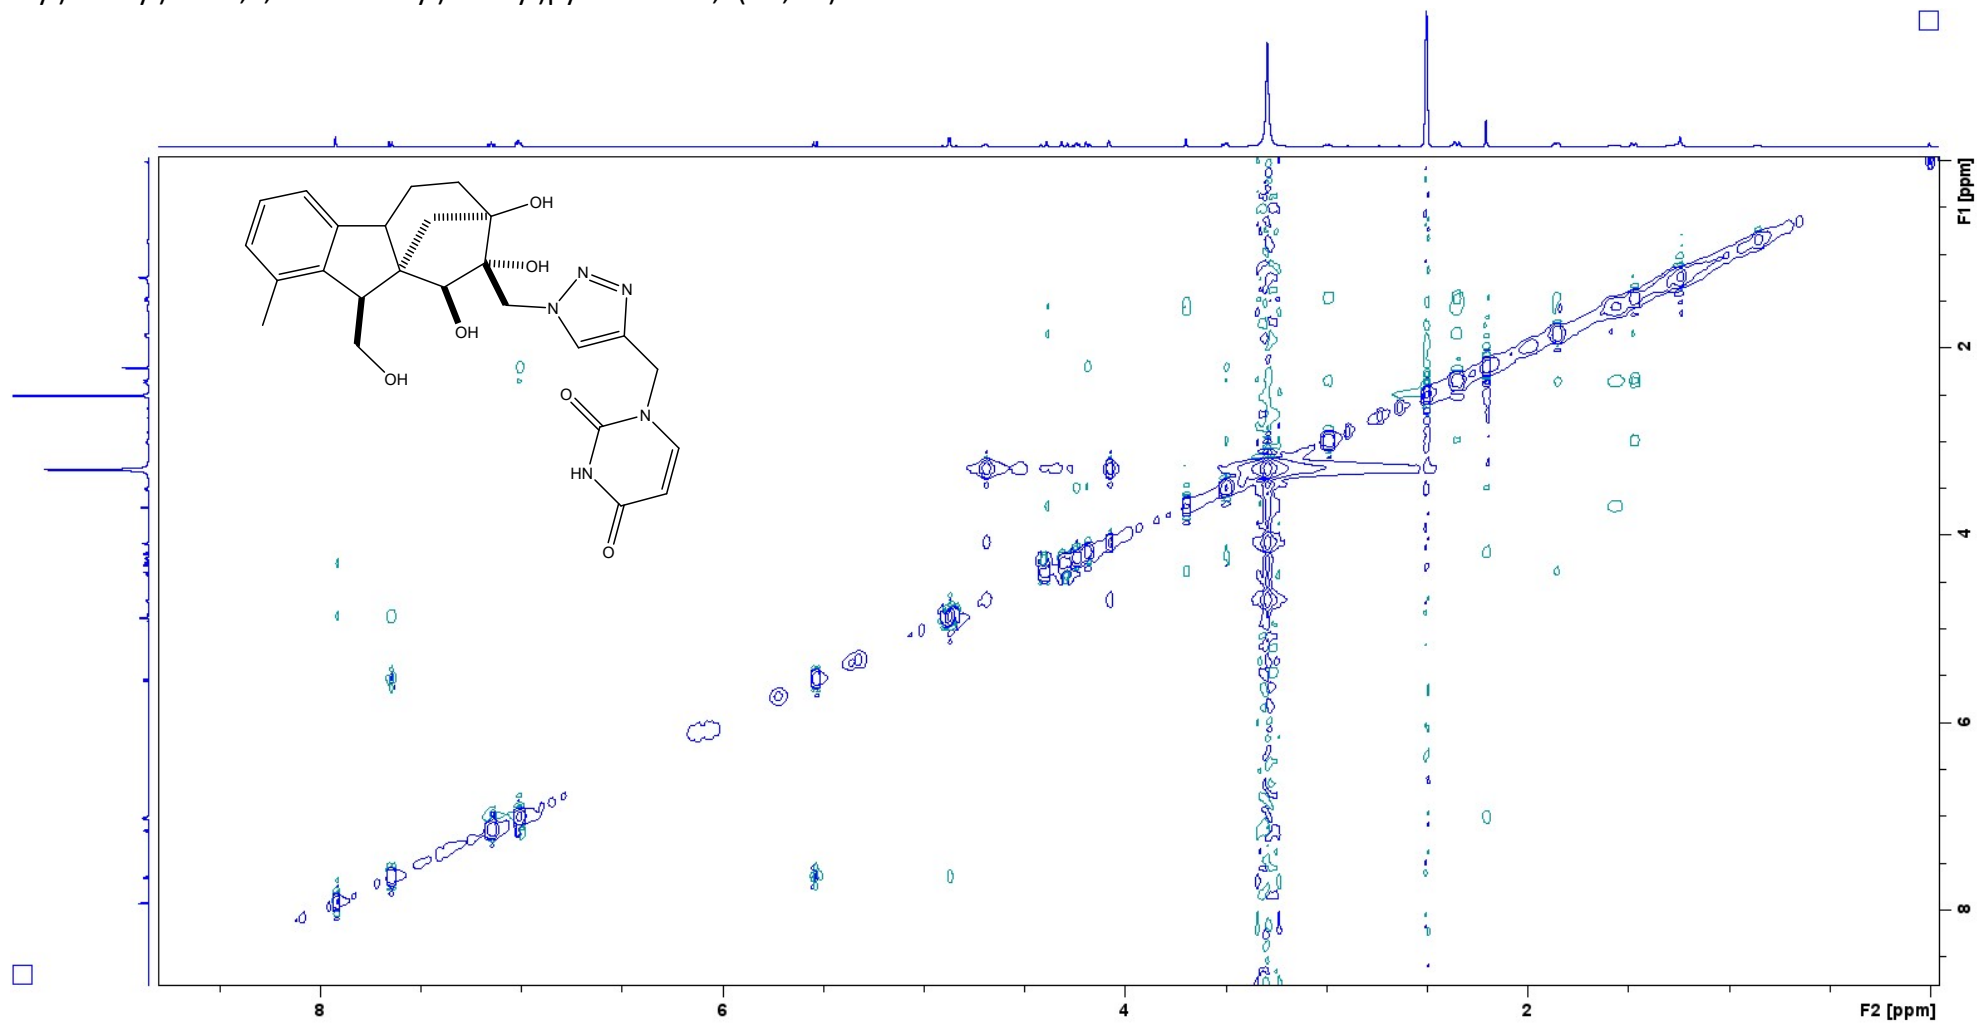

HSQC of 1-((1-(((7S,8R,9S,9aR,10S)-7,8,9-Trihydroxy-10-(hydroxymethyl)-1-methyl-4b,6,7,8,9,10-hexahydro-5H-7,9a-methanobenzo[a]azulen-8-yl)methyl)-1H-1,2,3-triazol-4-yl)methyl)pyrimidine-2,4(1H,3H)-dione **40**

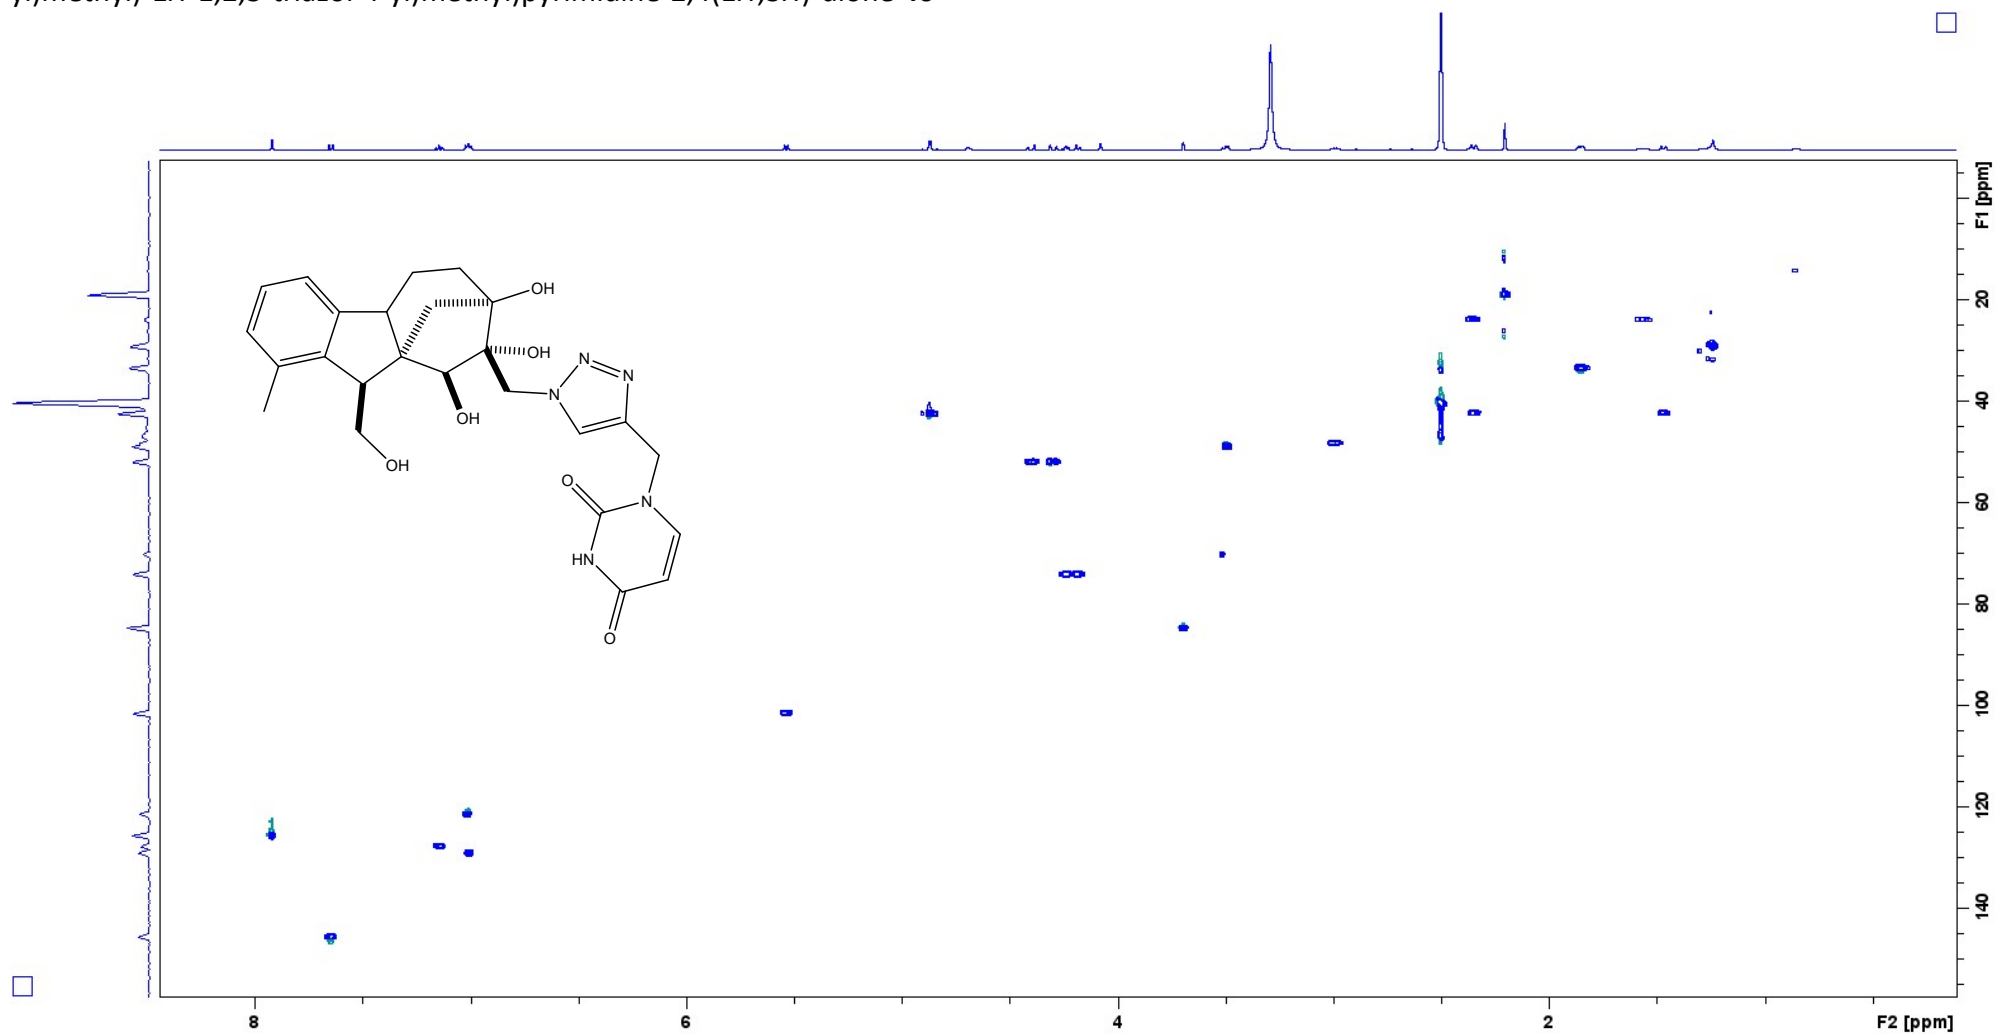

HMBC of 1-((1-(((7*S*,8*R*,9*S*,9*aR*,10*S*)-7,8,9-Trihydroxy-10-(hydroxymethyl)-1-methyl-4*b*,6,7,8,9,10-hexahydro-5*H*-7,9*a*-methanobenzo[*a*]azulen-8-yl)methyl)-1*H*-1,2,3-triazol-4-yl)methyl)pyrimidine-2,4(1*H*,3*H*)-dione **40**

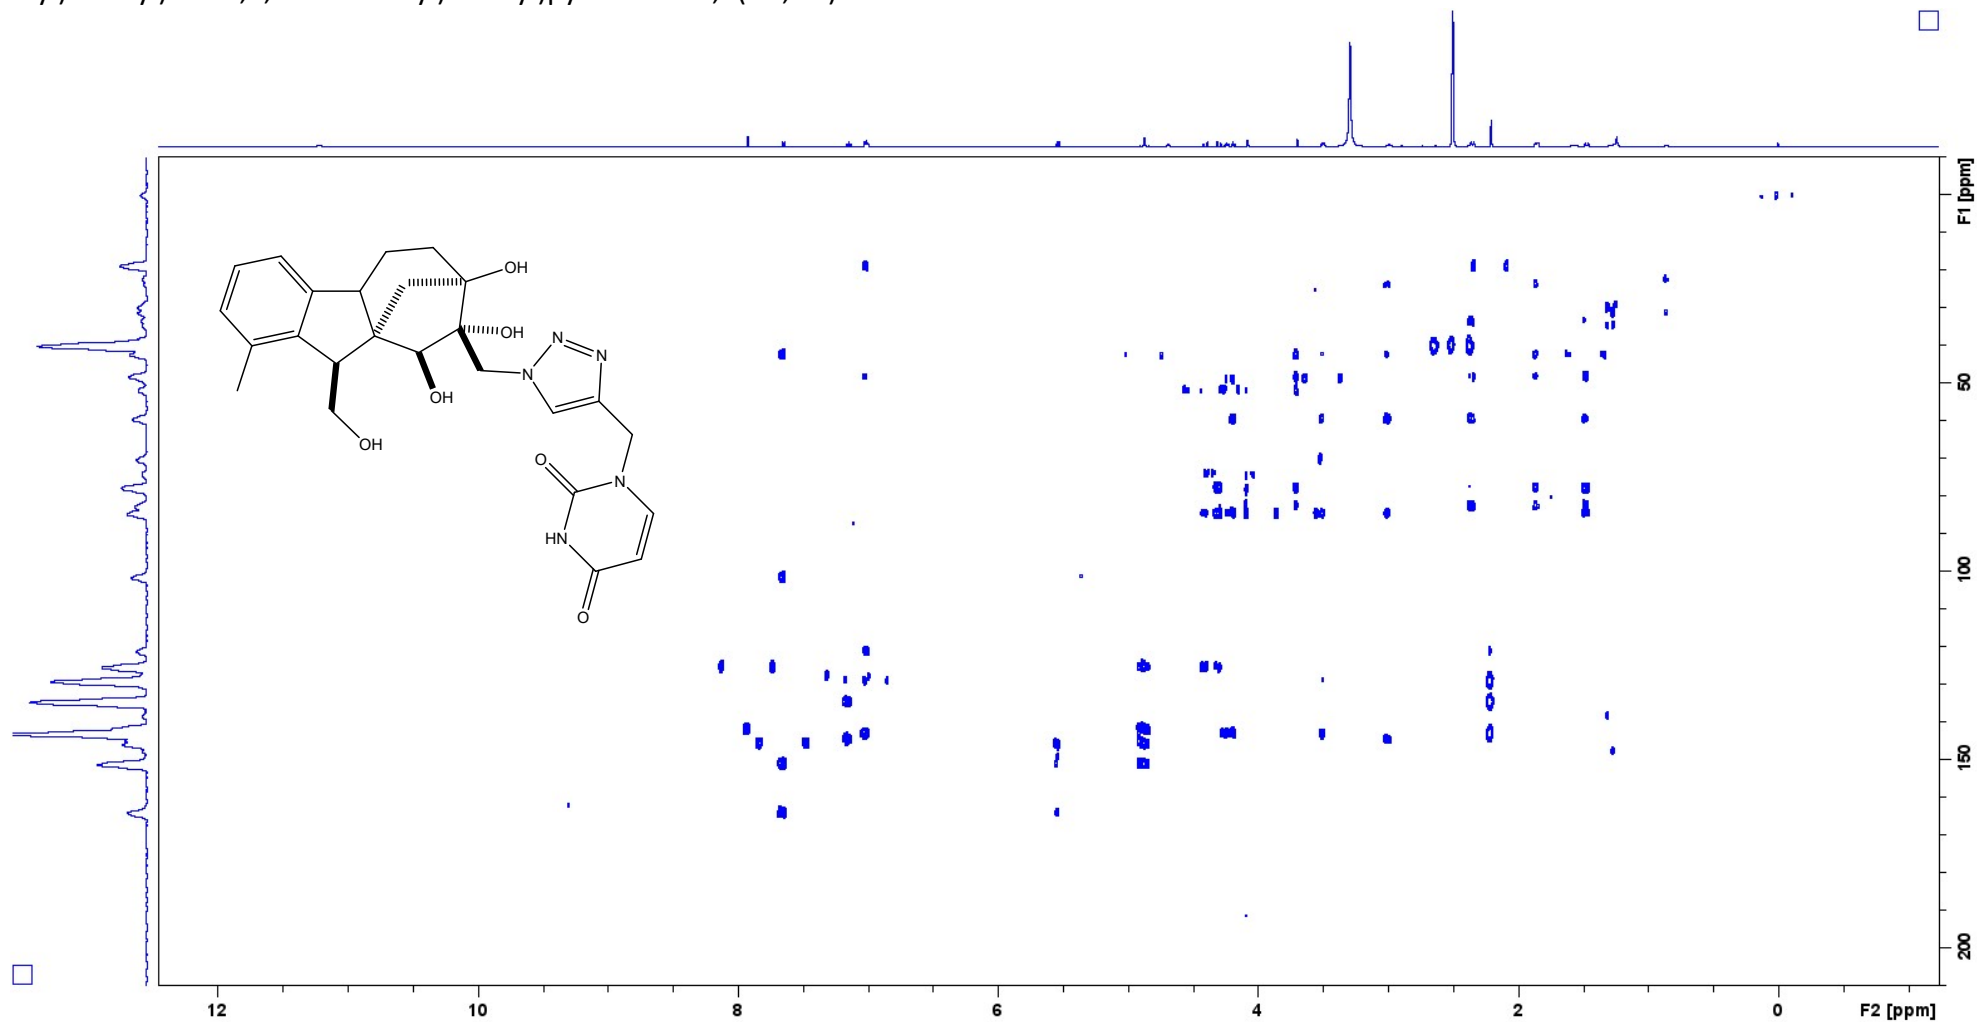

$^1\text{H-NMR}$  (500 MHz) of 5-Fluoro-1-((1-(((7*S*,8*R*,9*S*,9*aR*,10*S*)-7,8,9-trihydroxy-10-(hydroxymethyl)-1-methyl-4b,6,7,8,9,10-hexahydro-5*H*-7,9a-methanobenzo[*a*]azulen-8-yl)methyl)-1*H*-1,2,3-triazol-4-yl)methyl)pyrimidine-2,4(1*H*,3*H*)-dione **41**

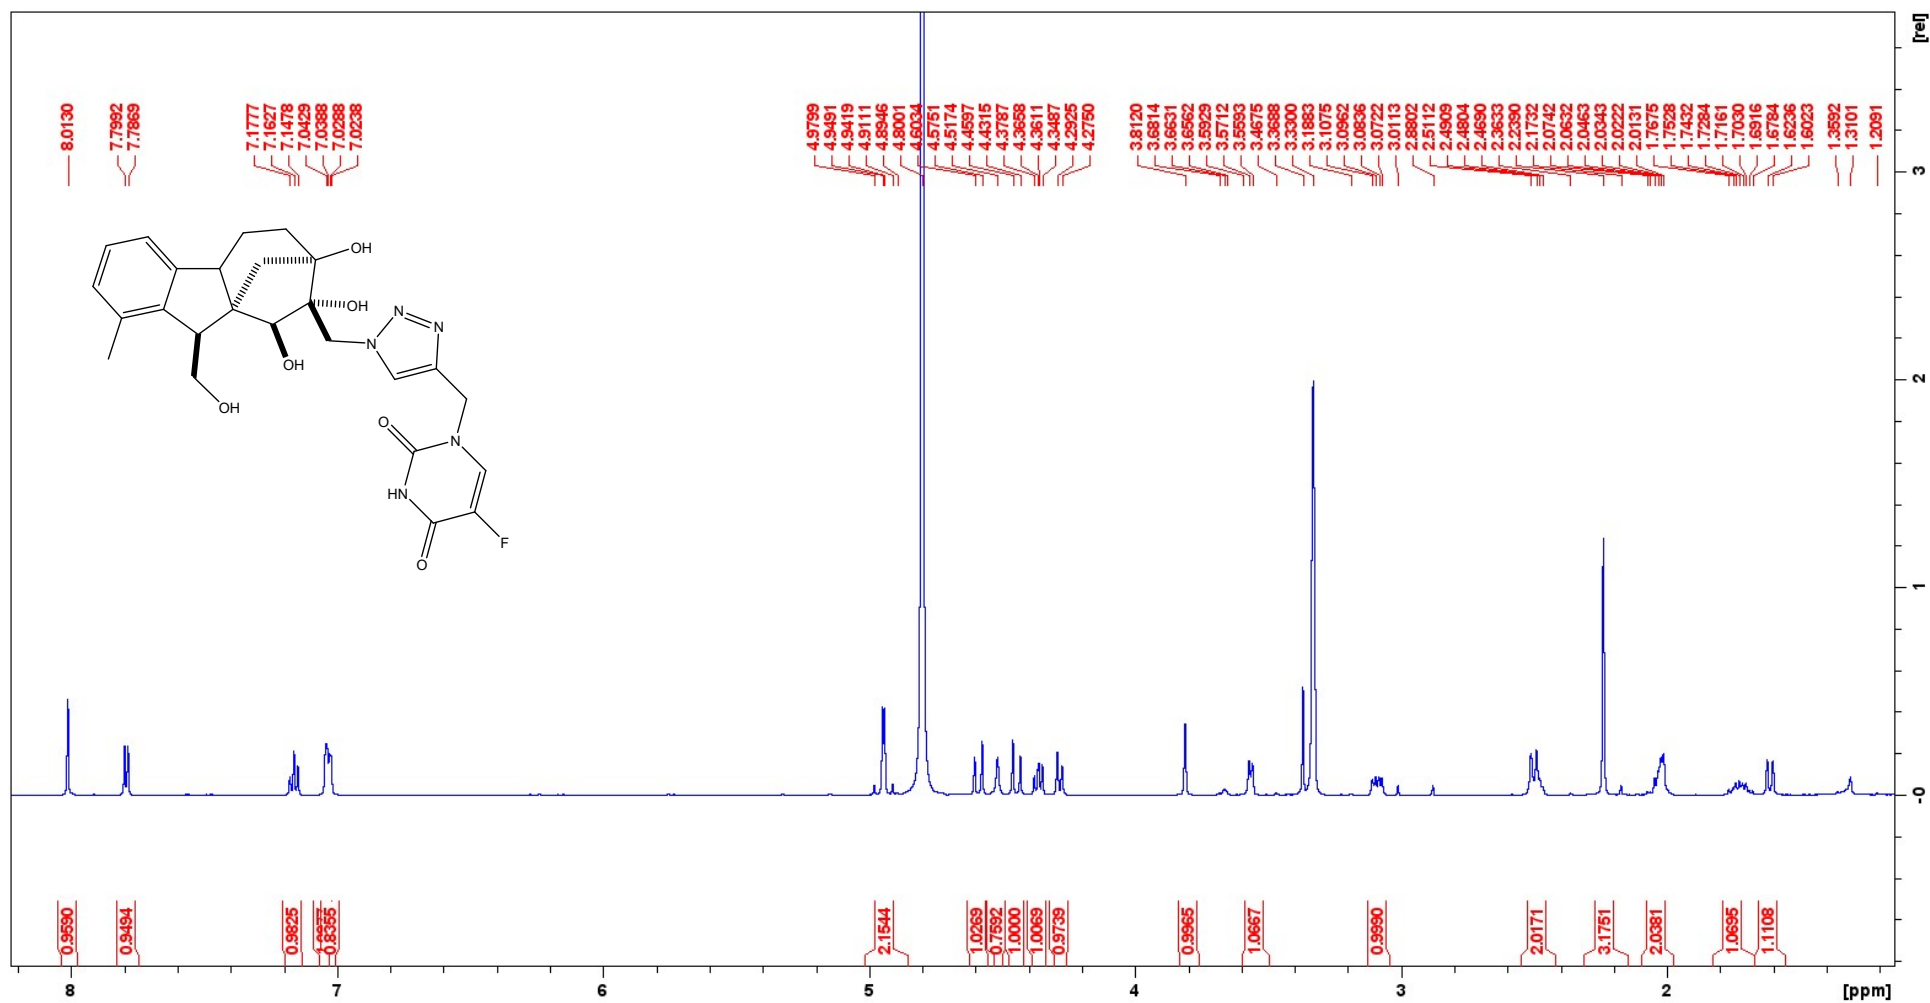



$^{13}\text{C}\{^1\text{H}\}$  J-MOD NMR (125 MHz) of 5-Fluoro-1-((1-(((7*S*,8*R*,9*S*,9*aR*,10*S*)-7,8,9-trihydroxy-10-(hydroxymethyl)-1-methyl-4b,6,7,8,9,10-hexahydro-5*H*-7,9a-methanobenzo[*a*]azulen-8-yl)methyl)-1*H*-1,2,3-triazol-4-yl)methyl)pyrimidine-2,4(1*H*,3*H*)-dione **41**

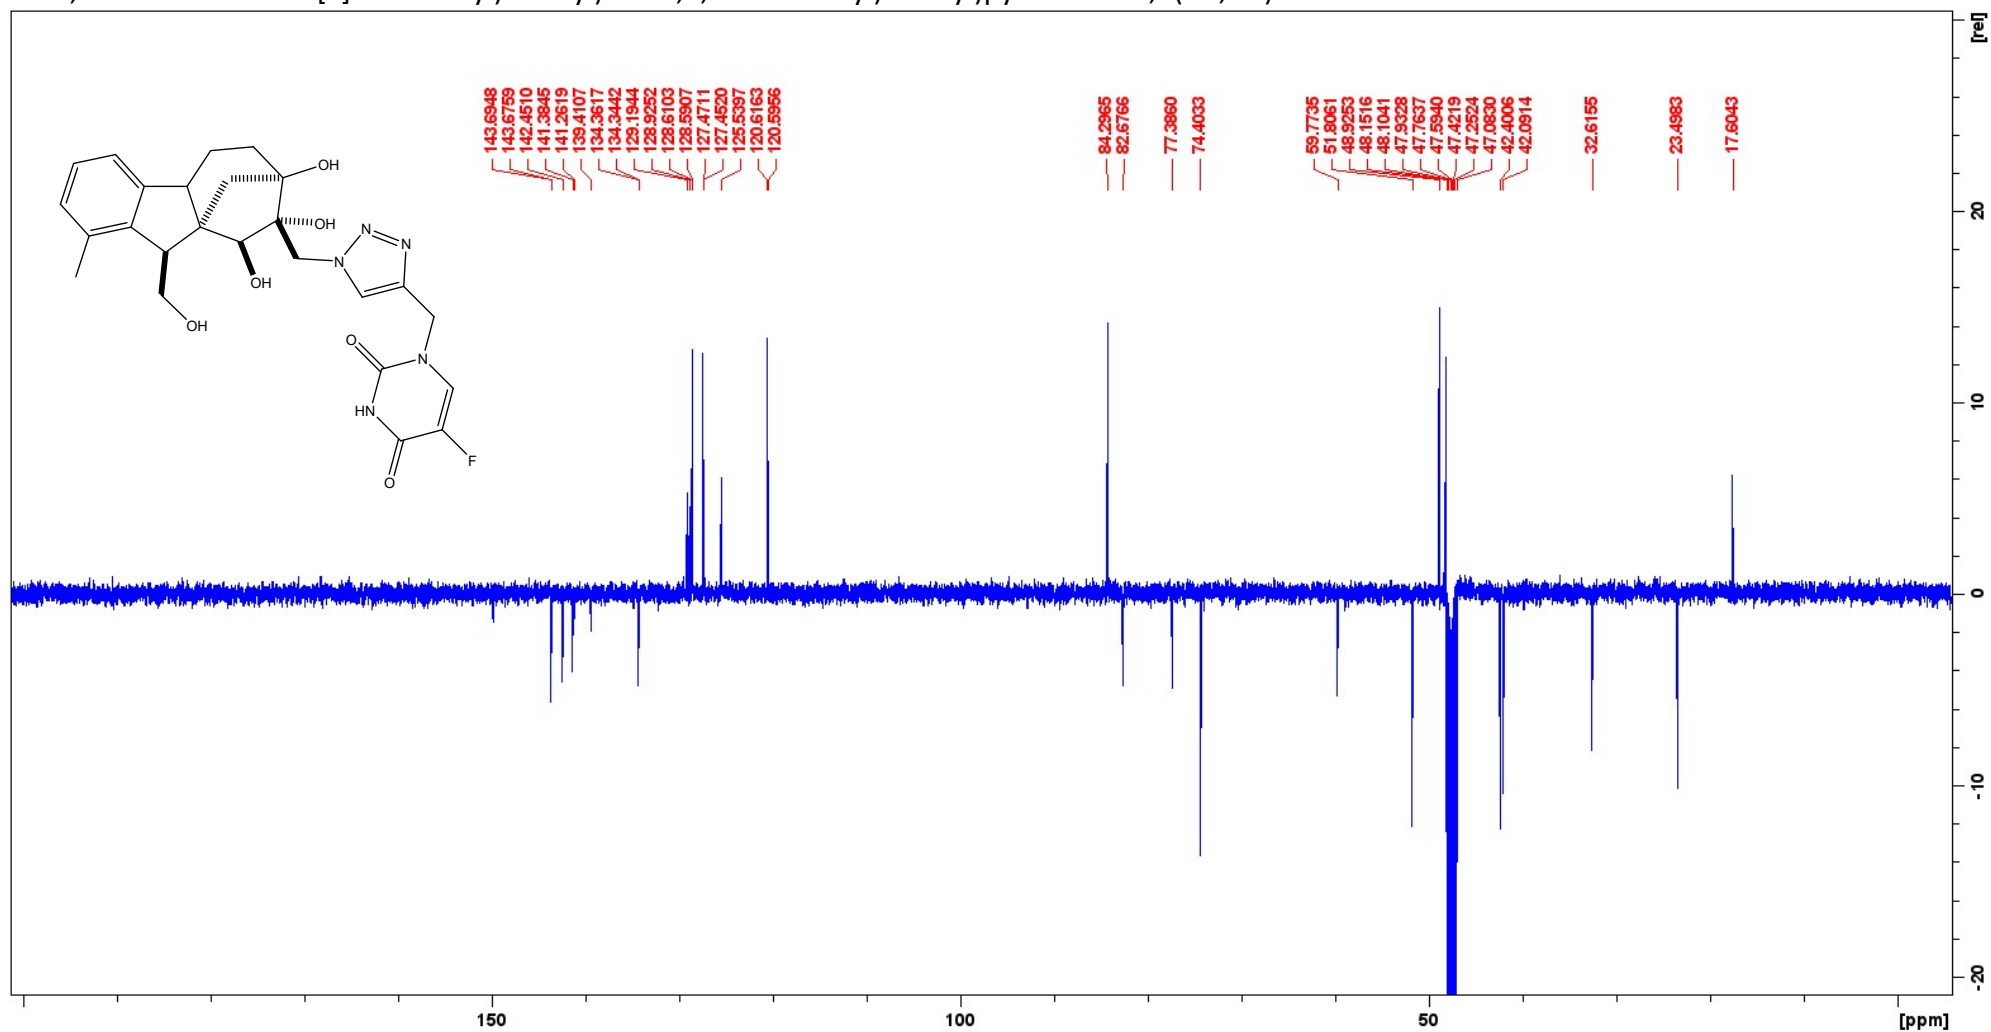

COSY of 5-Fluoro-1-((1-(((7S,8R,9S,9aR,10S)-7,8,9-trihydroxy-10-(hydroxymethyl)-1-methyl-4b,6,7,8,9,10-hexahydro-5H-7,9a-methanobenzo[a]azulen-8-yl)methyl)-1H-1,2,3-triazol-4-yl)methyl)pyrimidine-2,4(1H,3H)-dione **41**

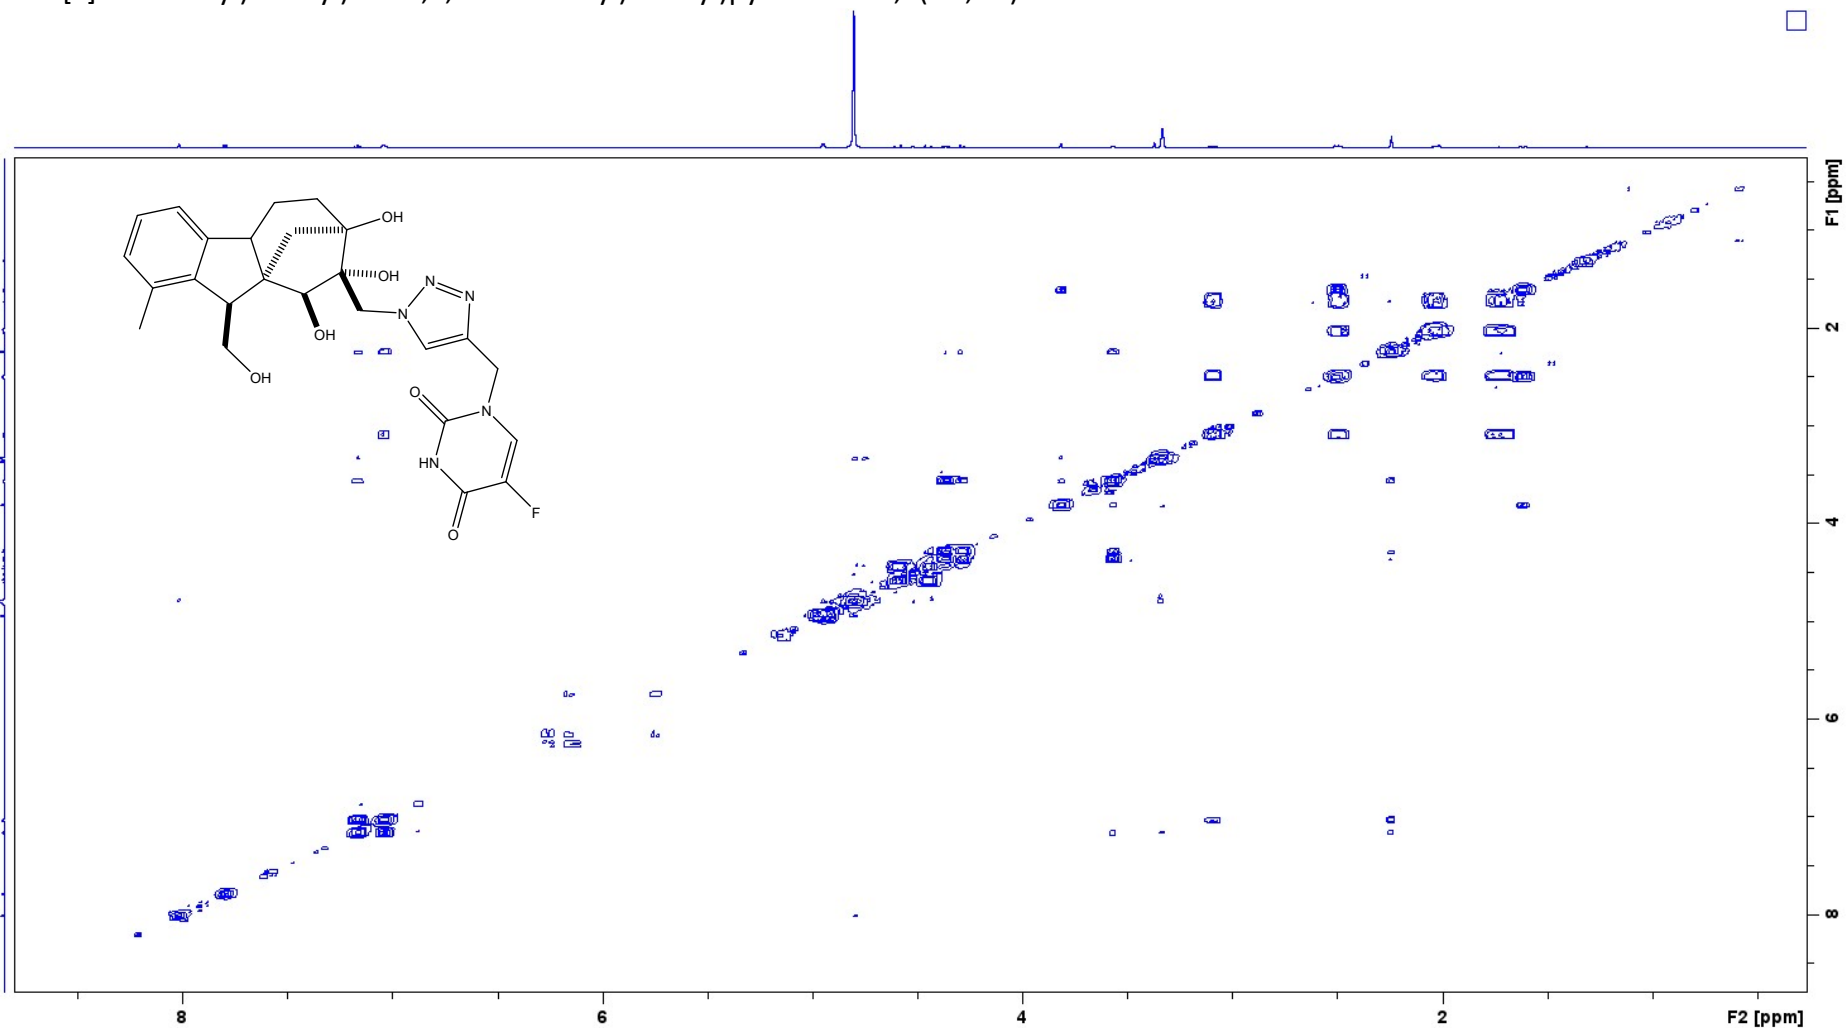

NOESY of 5-Fluoro-1-((1-(((7*S*,8*R*,9*S*,9*aR*,10*S*)-7,8,9-trihydroxy-10-(hydroxymethyl)-1-methyl-4*b*,6,7,8,9,10-hexahydro-5*H*-7,9a-methanobenzo[*a*]azulen-8-yl)methyl)-1*H*-1,2,3-triazol-4-yl)methyl)pyrimidine-2,4(1*H*,3*H*)-dione **41**

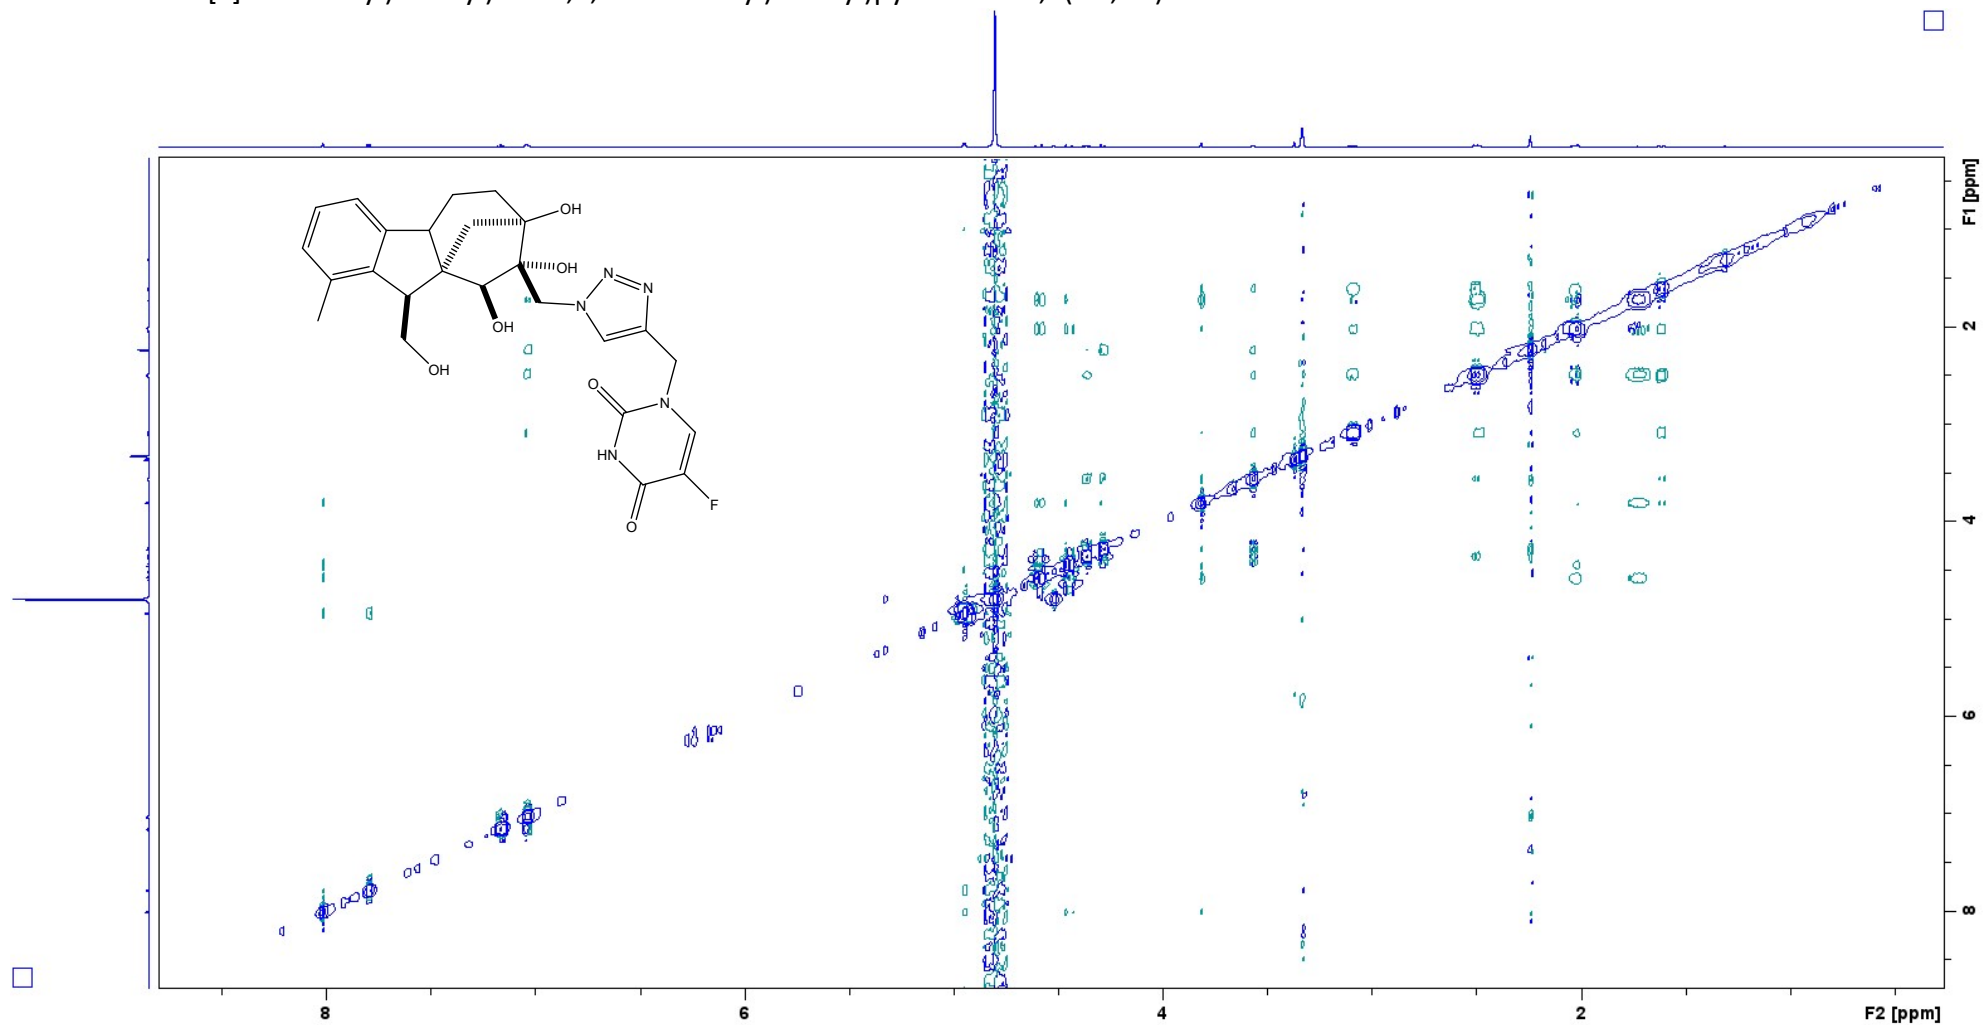

HSQC of 5-Fluoro-1-((1-(((7*S*,8*R*,9*S*,9*aR*,10*S*)-7,8,9-trihydroxy-10-(hydroxymethyl)-1-methyl-4*b*,6,7,8,9,10-hexahydro-5*H*-7,9a-methanobenzo[*a*]azulen-8-yl)methyl)-1*H*-1,2,3-triazol-4-yl)methyl)pyrimidine-2,4(1*H*,3*H*)-dione **41**

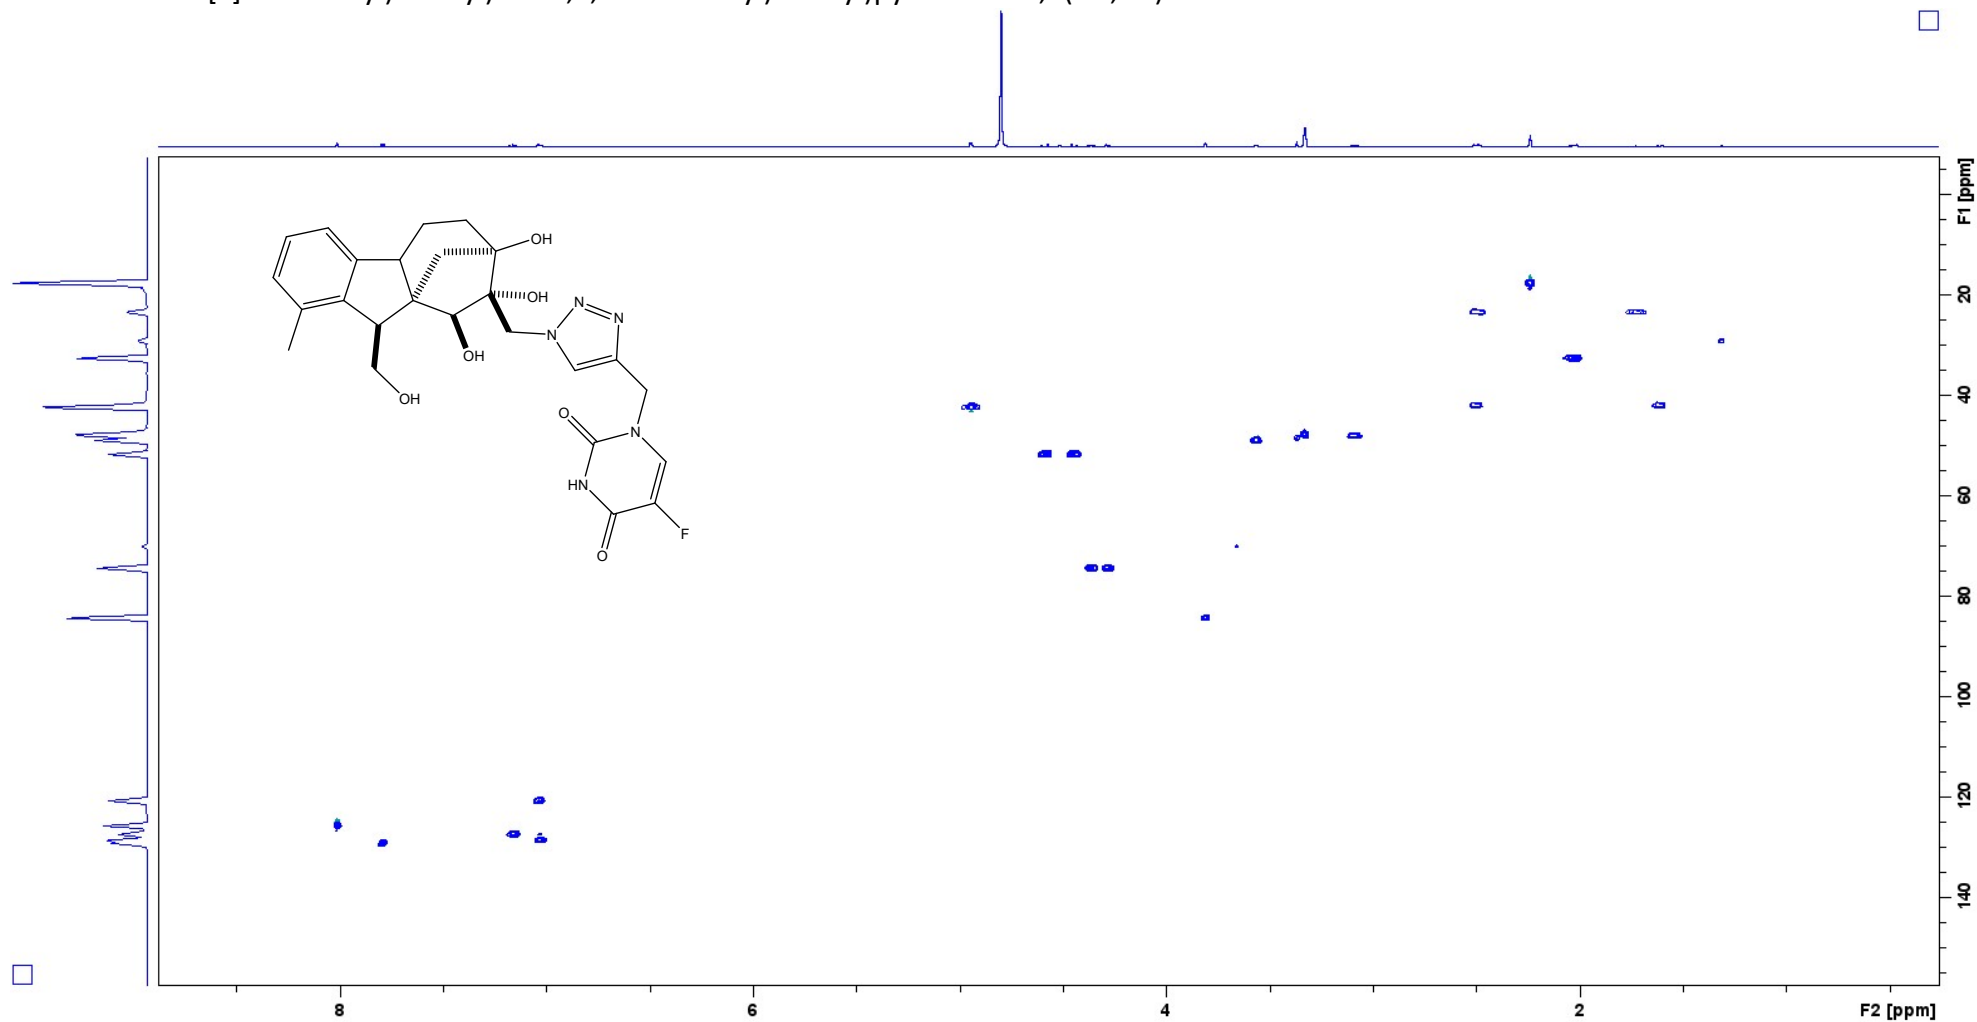

HMBC of 5-Fluoro-1-((1-(((7S,8R,9S,9aR,10S)-7,8,9-trihydroxy-10-(hydroxymethyl)-1-methyl-4b,6,7,8,9,10-hexahydro-5H-7,9a-methanobenzo[a]azulen-8-yl)methyl)-1H-1,2,3-triazol-4-yl)methyl)pyrimidine-2,4(1H,3H)-dione **41**

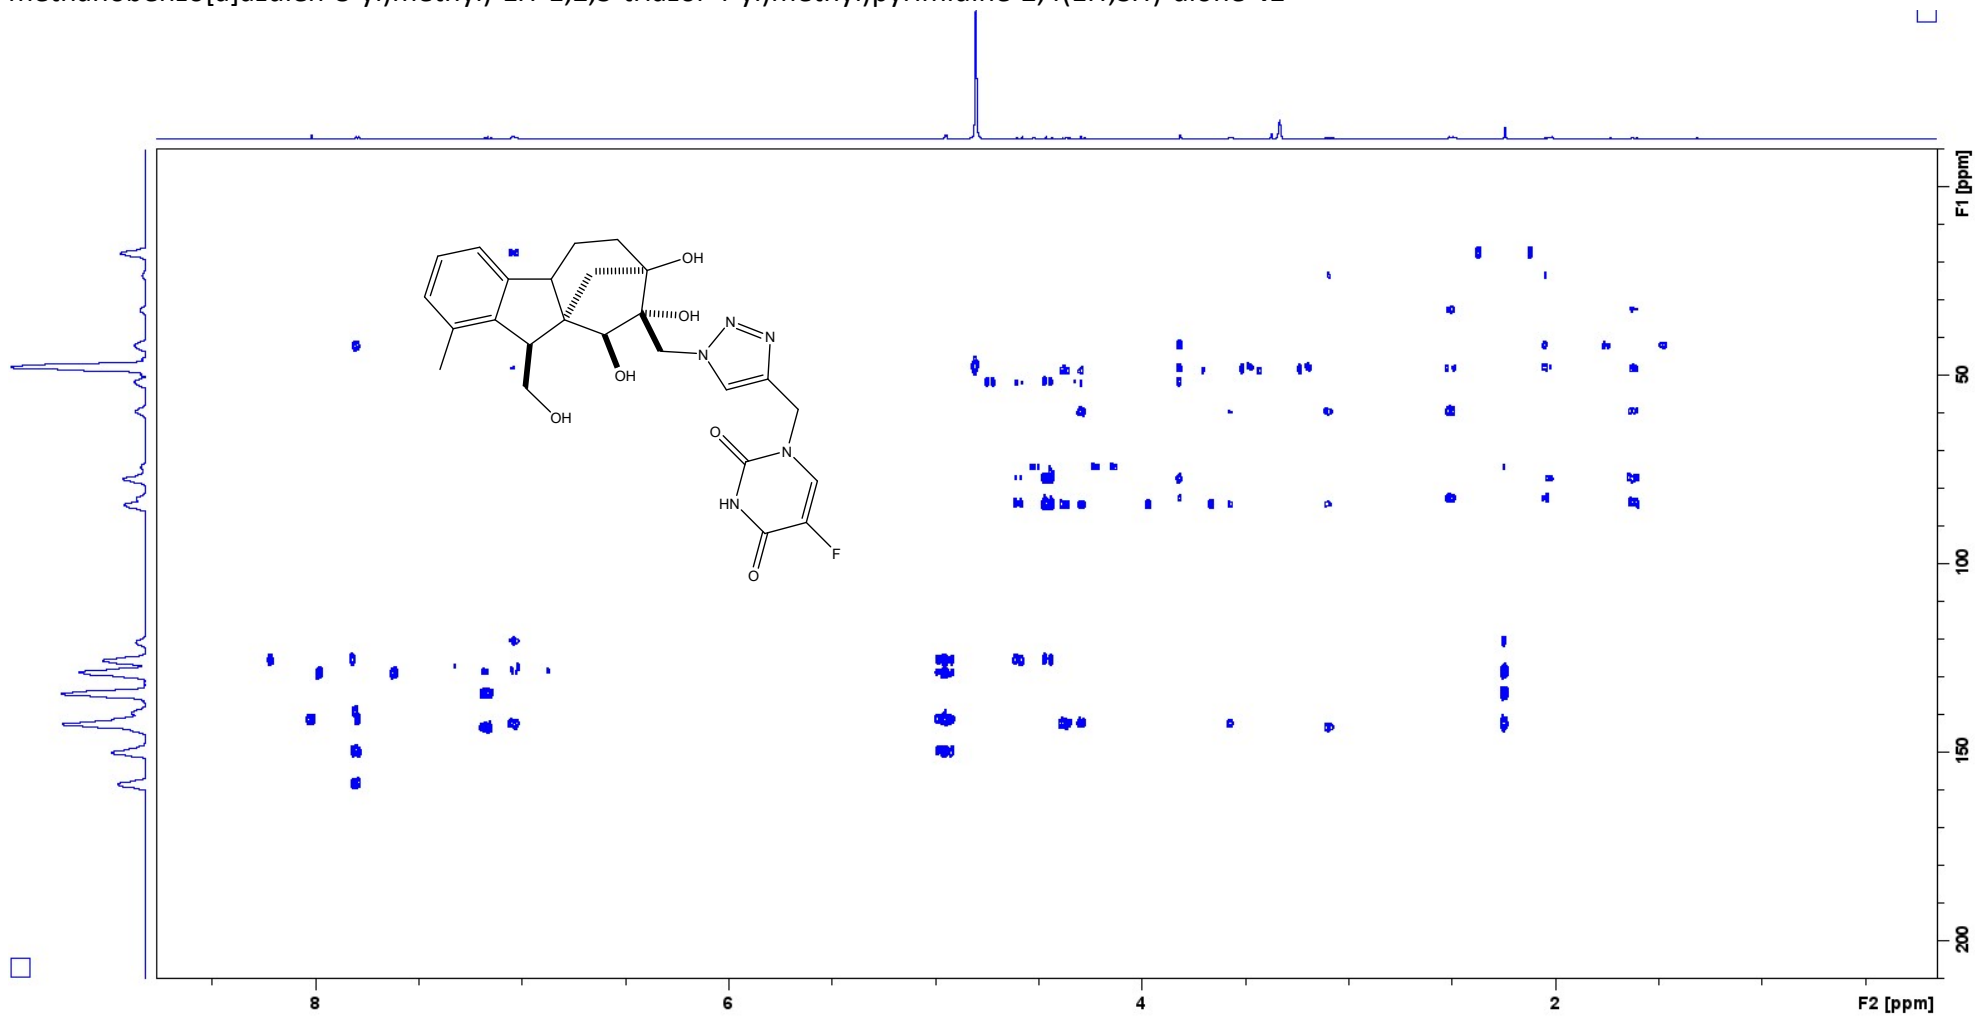

$^{19}\text{F}$  J-MOD NMR (470 MHz) of 5-Fluoro-1-((1-(((7*S*,8*R*,9*S*,9*aR*,10*S*)-7,8,9-trihydroxy-10-(hydroxymethyl)-1-methyl-4b,6,7,8,9,10-hexahydro-5*H*-7,9a-methanobenzo[*a*]azulen-8-yl)methyl)-1*H*-1,2,3-triazol-4-yl)methyl)pyrimidine-2,4(1*H*,3*H*)-dione **41**

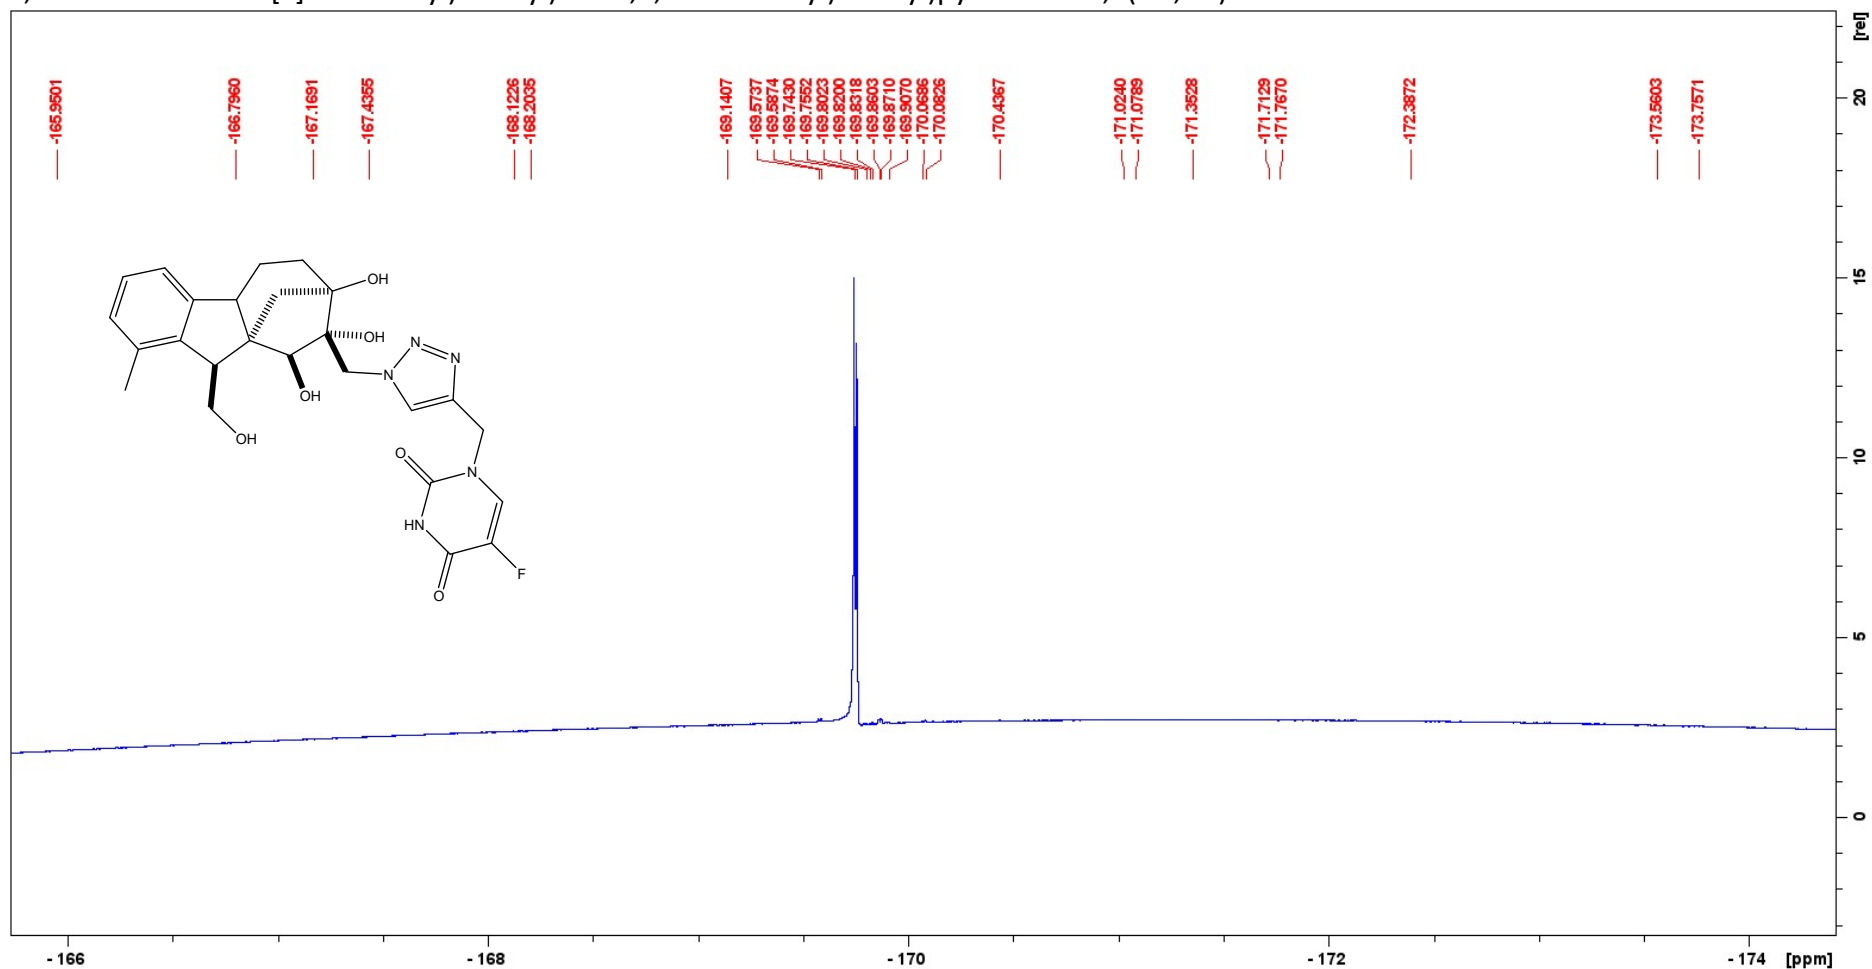

Table S2 Docking Study

| Compound | Interactions with ALK (PDB code: 3AOX, resolution: 1.75 Å)                                                                                                                                                                                                                                                                                                                                                               |
|----------|--------------------------------------------------------------------------------------------------------------------------------------------------------------------------------------------------------------------------------------------------------------------------------------------------------------------------------------------------------------------------------------------------------------------------|
| 18       | 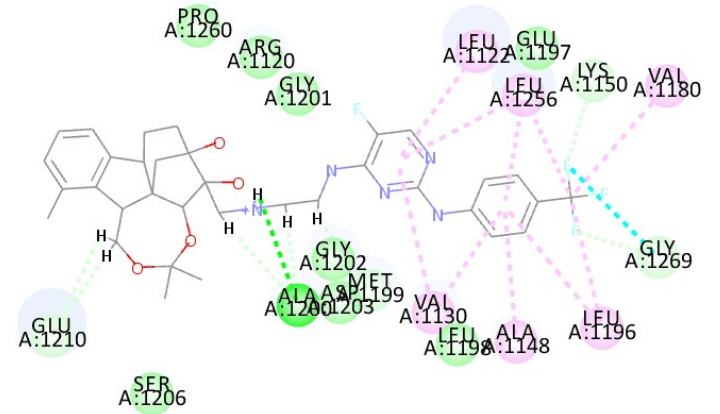 <p>Residues interacting with compound 18: PRO A:1260, ARG A:1120, GLY A:1201, LEU A:1127, GLU A:1197, LYS A:1150, VAL A:1180, LEU A:1256, GLY A:1269, MET A:1199, VAL A:1130, LEU A:1198, ALA A:1148, LEU A:1196, ALA A:1200, MET A:1203, VAL A:1130, LEU A:1198, ALA A:1148, LEU A:1196, GLY A:1202, SER A:1206, and GLU A:1210.</p> |
| 23       |  <p>Residues interacting with compound 23: PRO A:1260, ARG A:1120, ALA A:1200, ASP A:1203, GLY A:1202, LEU A:1196, ASP A:1122, VAL A:1148, ALA A:1148, MET A:1199, VAL A:1130, GLU A:1197, LEU A:1256, LEU A:1198, VAL A:1130, GLU A:1197, LEU A:1198, GLY A:1123, PHE A:1207, SER A:1206, and GLU A:1210.</p>                        |

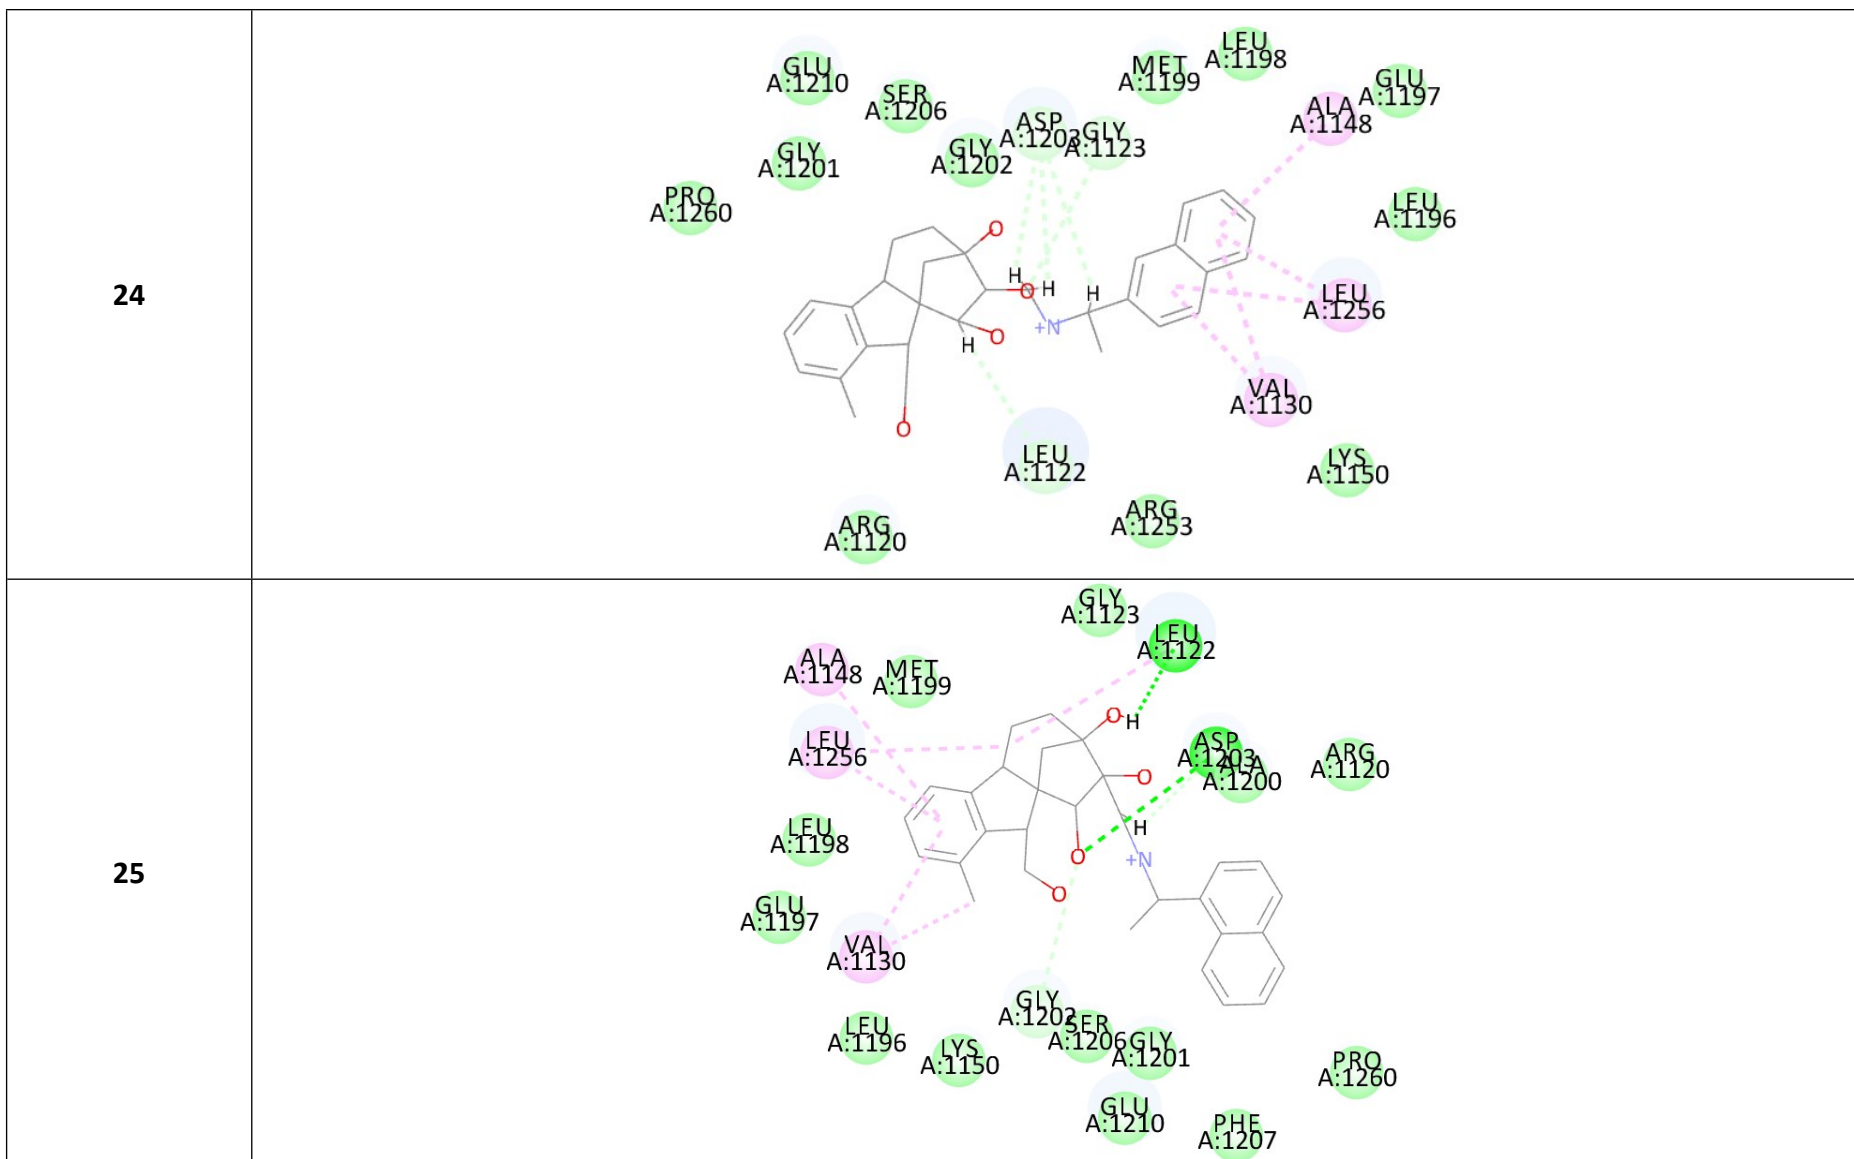



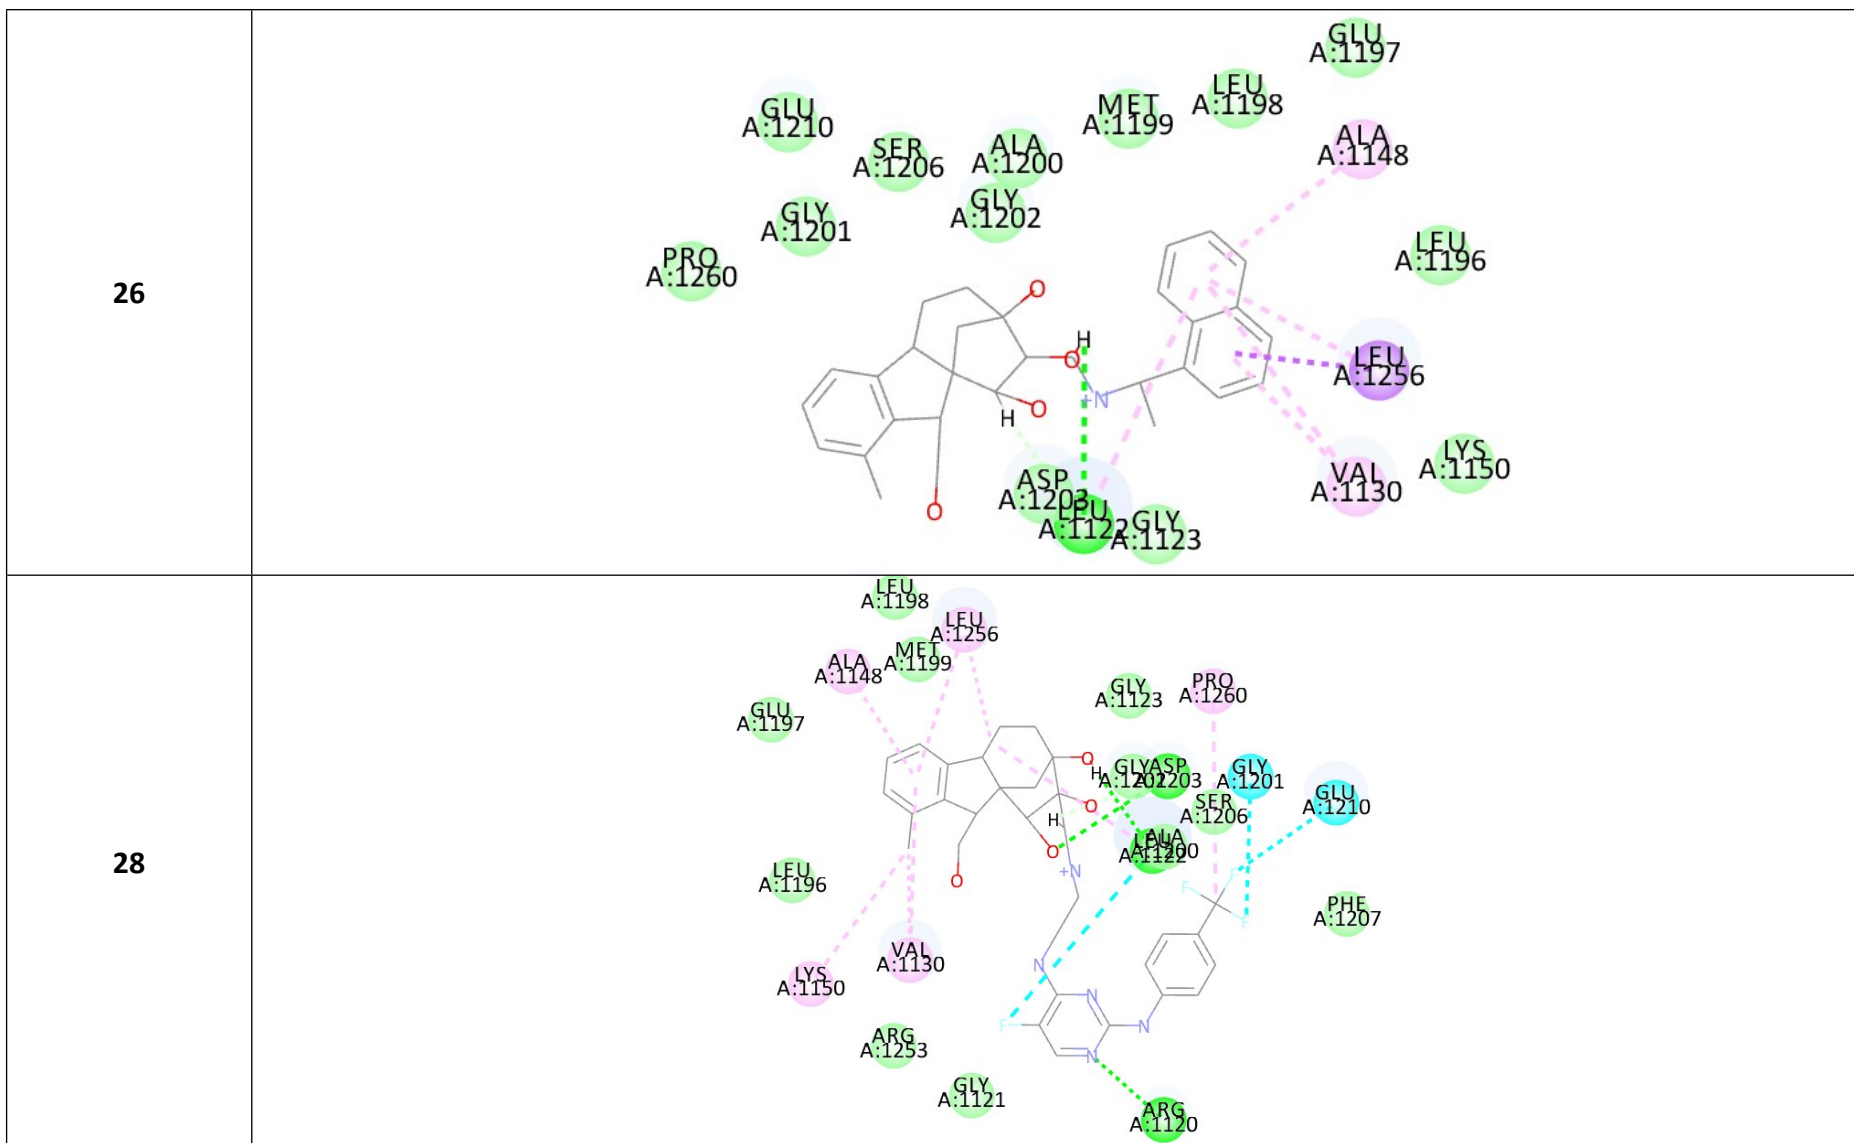

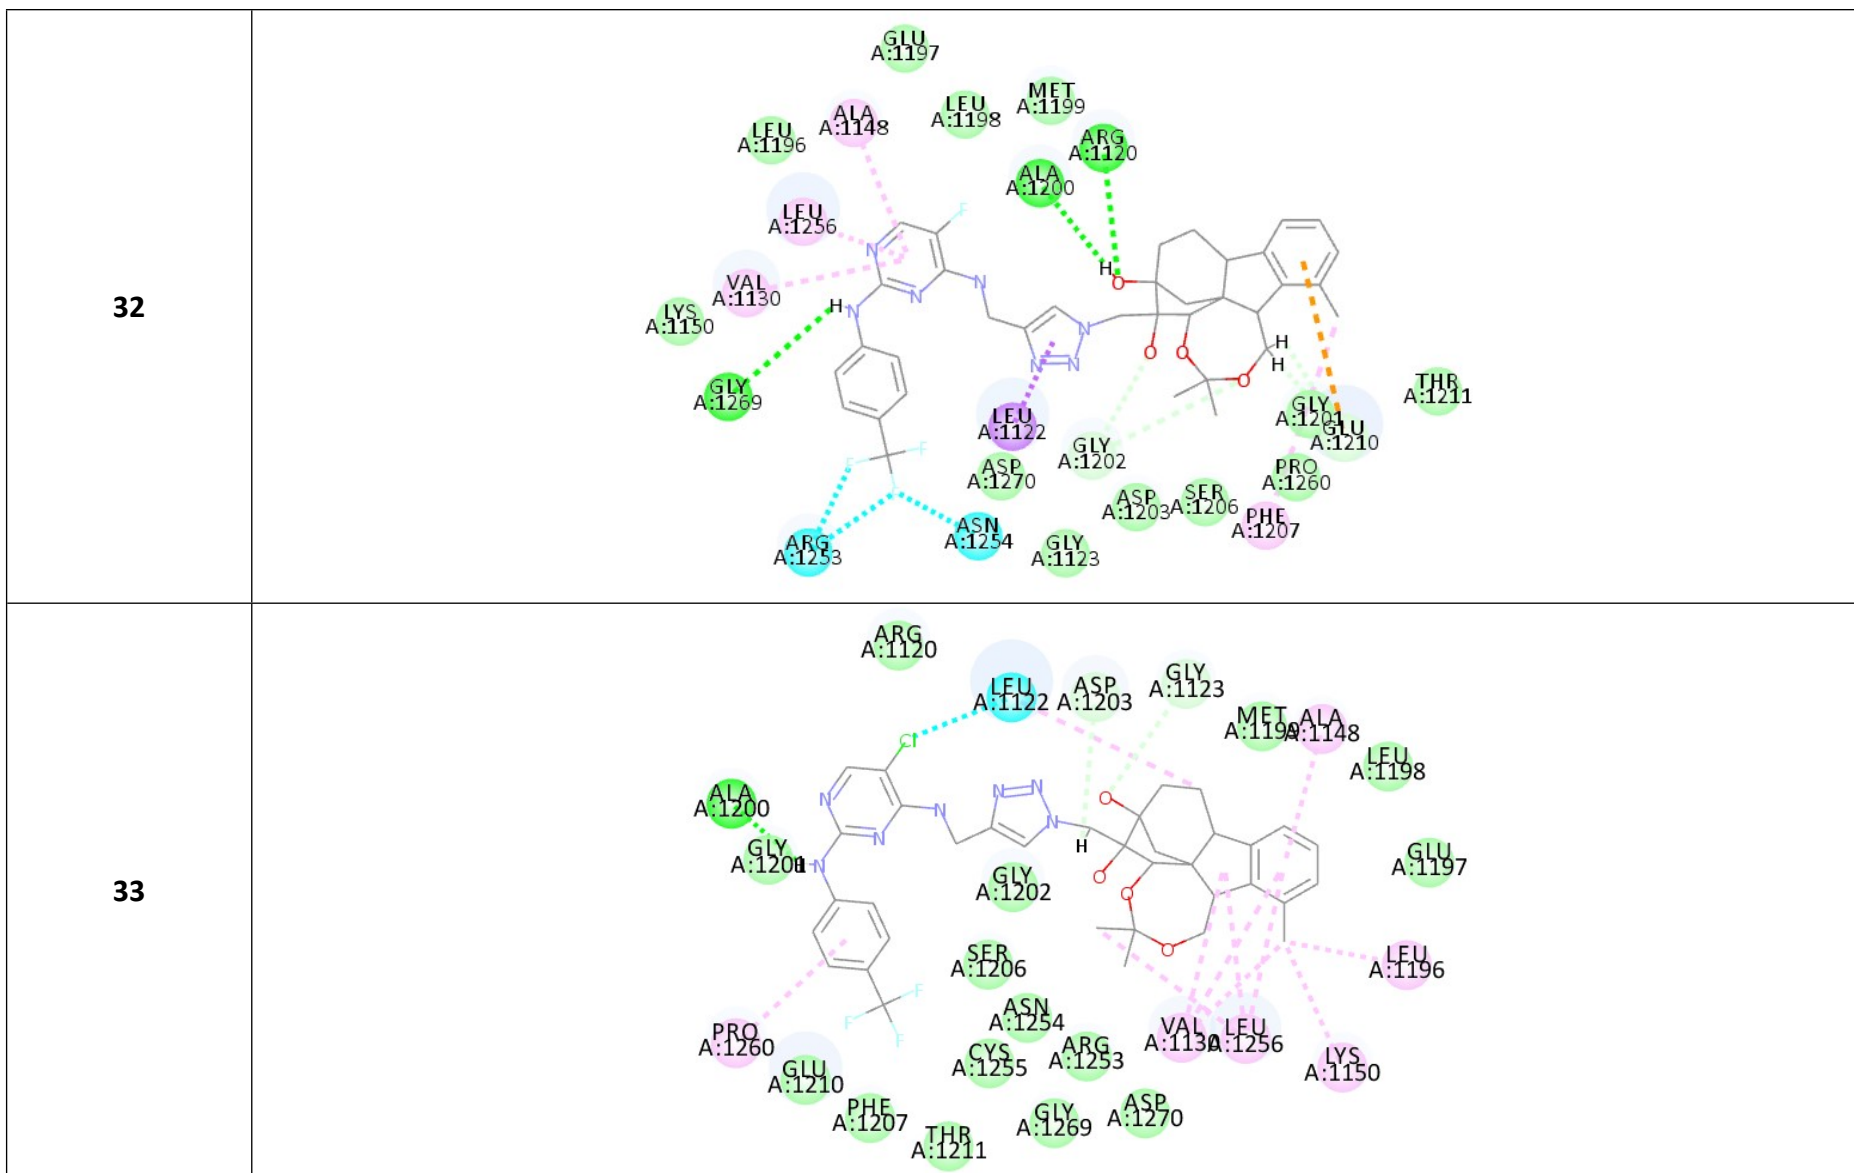

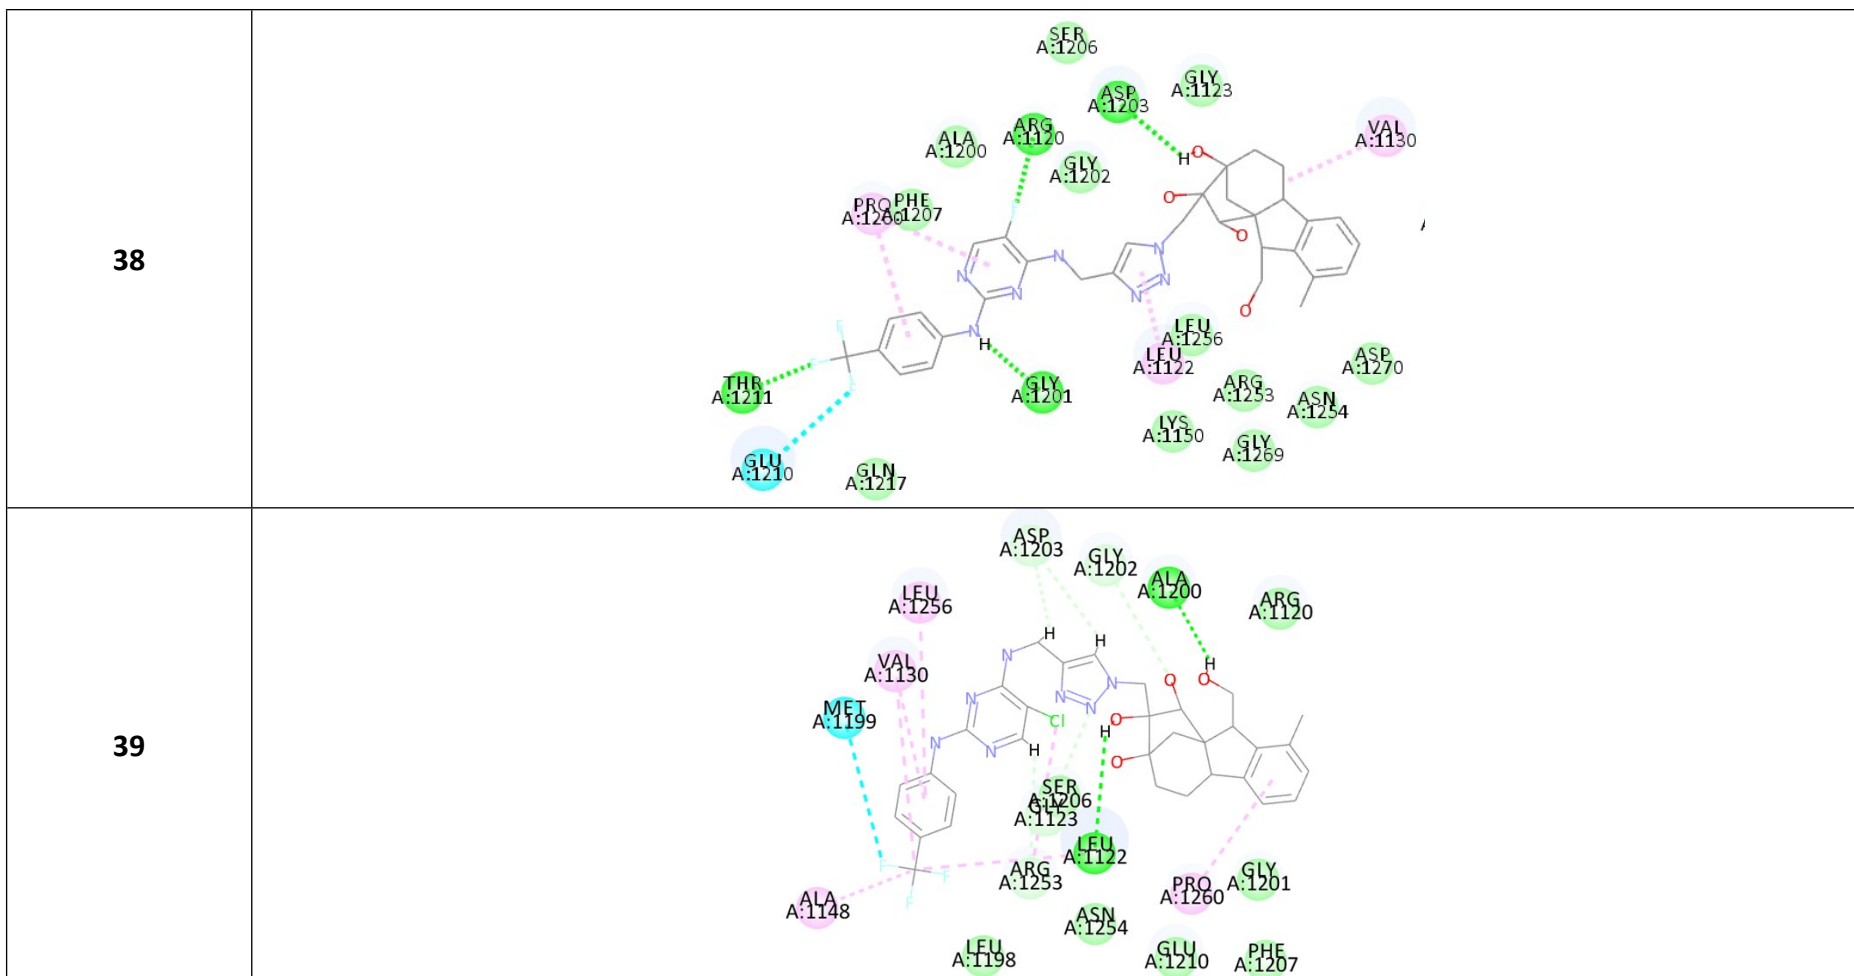

| Compound | Interactions with Pim-1 (PDB code: 4ALW, resolution: 1.92 Å)                                                                                                                                                                                                                                                                                                                                                                                                                                                                                                                                               |
|----------|------------------------------------------------------------------------------------------------------------------------------------------------------------------------------------------------------------------------------------------------------------------------------------------------------------------------------------------------------------------------------------------------------------------------------------------------------------------------------------------------------------------------------------------------------------------------------------------------------------|
| 18       | <p>Residues interacting with compound 18: ASP A:167, LYS A:169, THR A:204, GLY A:47, GLU A:171, ASP A:186, GLY A:45, ASP A:128, GLN A:127, VAL A:126, LEU A:174, LEU A:174, LEU A:44, ARG A:122, ALA A:65, VAL A:52, ILE A:185, LYS A:67, PHE A:49, SER A:189, SER A:75, GLY A:188, ASN A:172, SER A:46, ARG A:73, ASP A:202, GLY A:203, GLY A:48, ASP A:167, LYS A:169, THR A:204, GLY A:47, GLU A:171, ASP A:186, GLY A:45, ASP A:128, GLN A:127, VAL A:126, LEU A:174, LEU A:44, ARG A:122, ALA A:65, VAL A:52, ILE A:185, LYS A:67, PHE A:49, SER A:189, SER A:75, GLY A:188, ASN A:172, SER A:46.</p> |
| 23       | <p>Residues interacting with compound 23: SER A:189, ASP A:167, GLY A:188, PHE A:49, GLY A:45, ASP A:186, GLY A:47, LYS A:169, GLU A:171, SER A:46, ASN A:172, LYS A:67, ILE A:185, LEU A:174, VAL A:52, LEU A:120, ALA A:65, LEU A:44, ASP A:128, SER A:189, ASP A:167, GLY A:188, PHE A:49, GLY A:45, ASP A:186, GLY A:47, LYS A:169, GLU A:171, SER A:46, ASN A:172, LYS A:67, ILE A:185, LEU A:174, VAL A:52, LEU A:120, ALA A:65, LEU A:44, ASP A:128.</p>                                                                                                                                            |

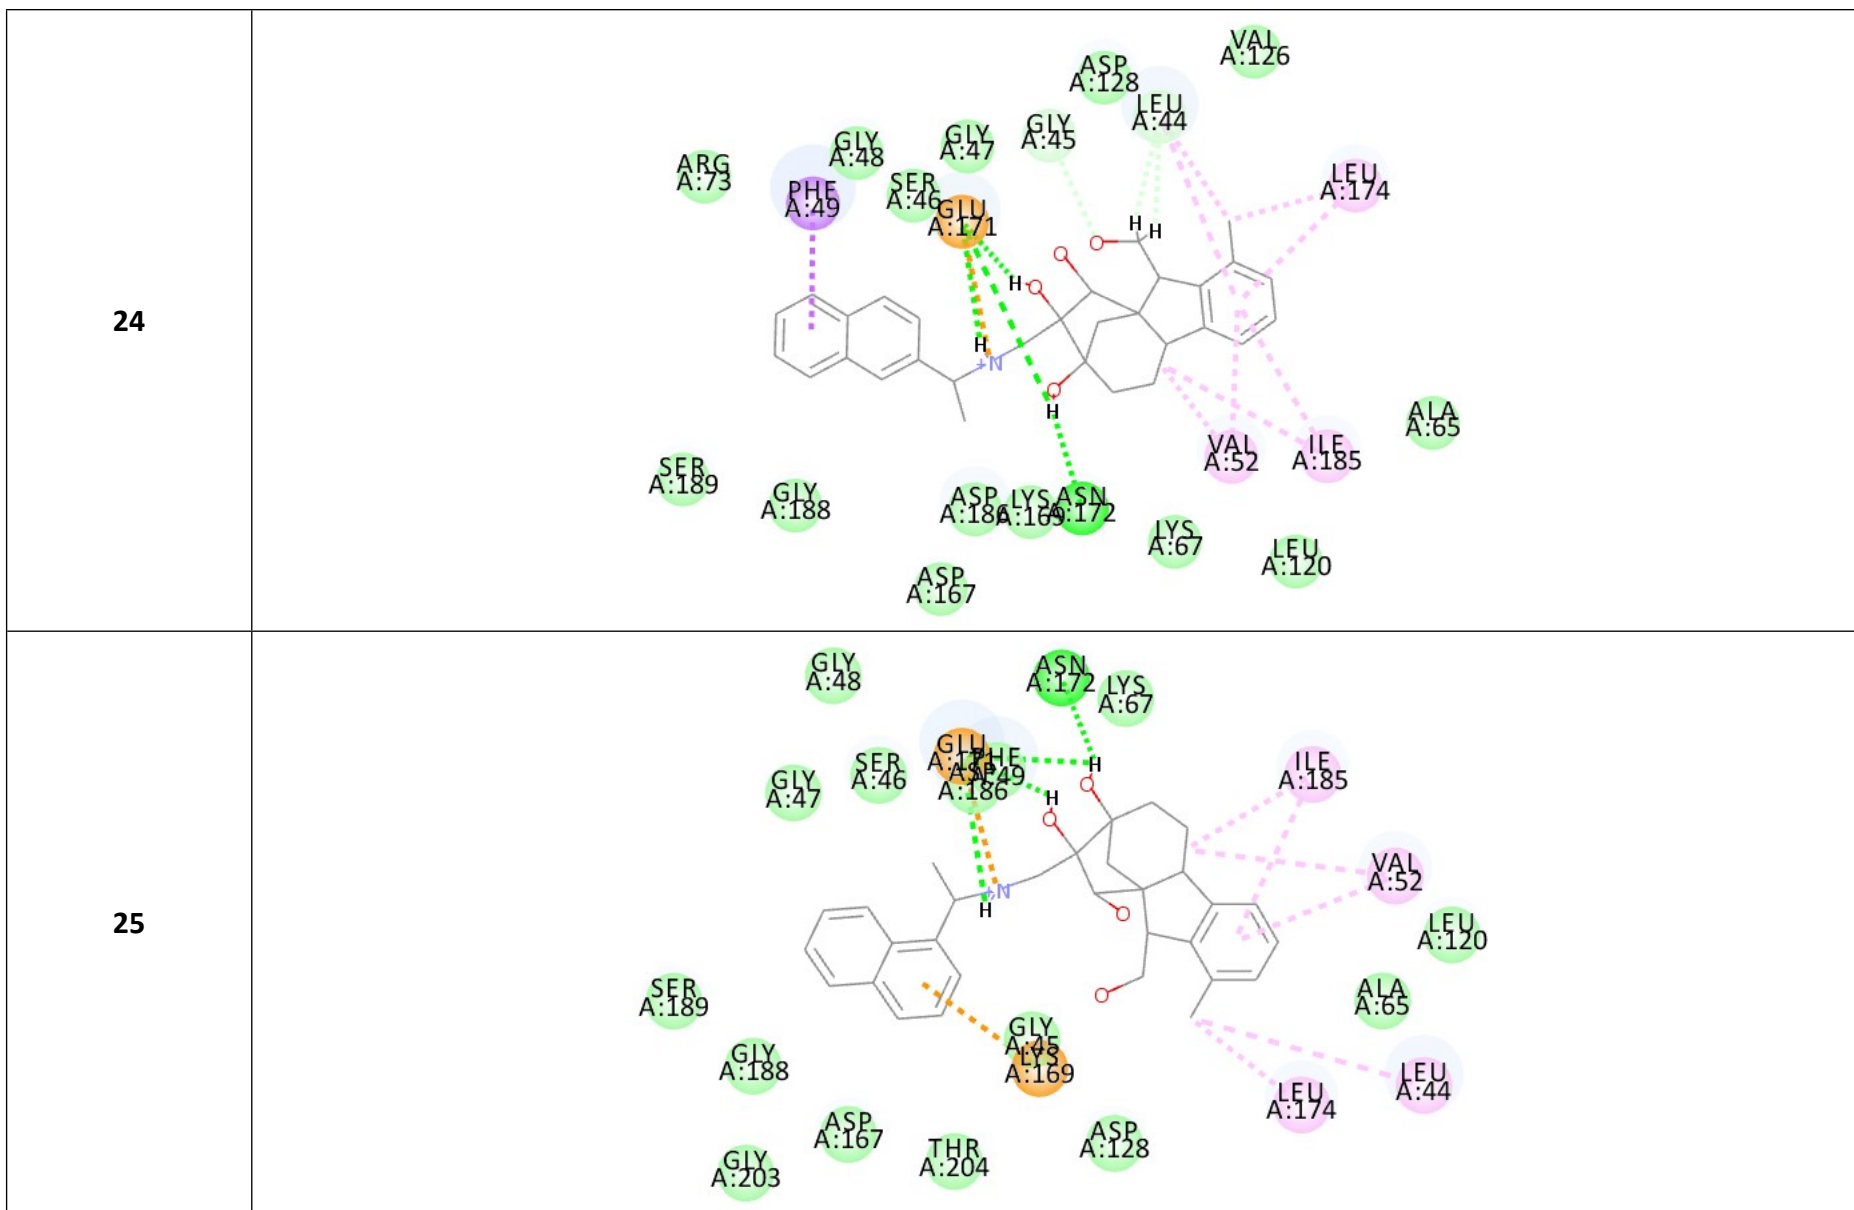

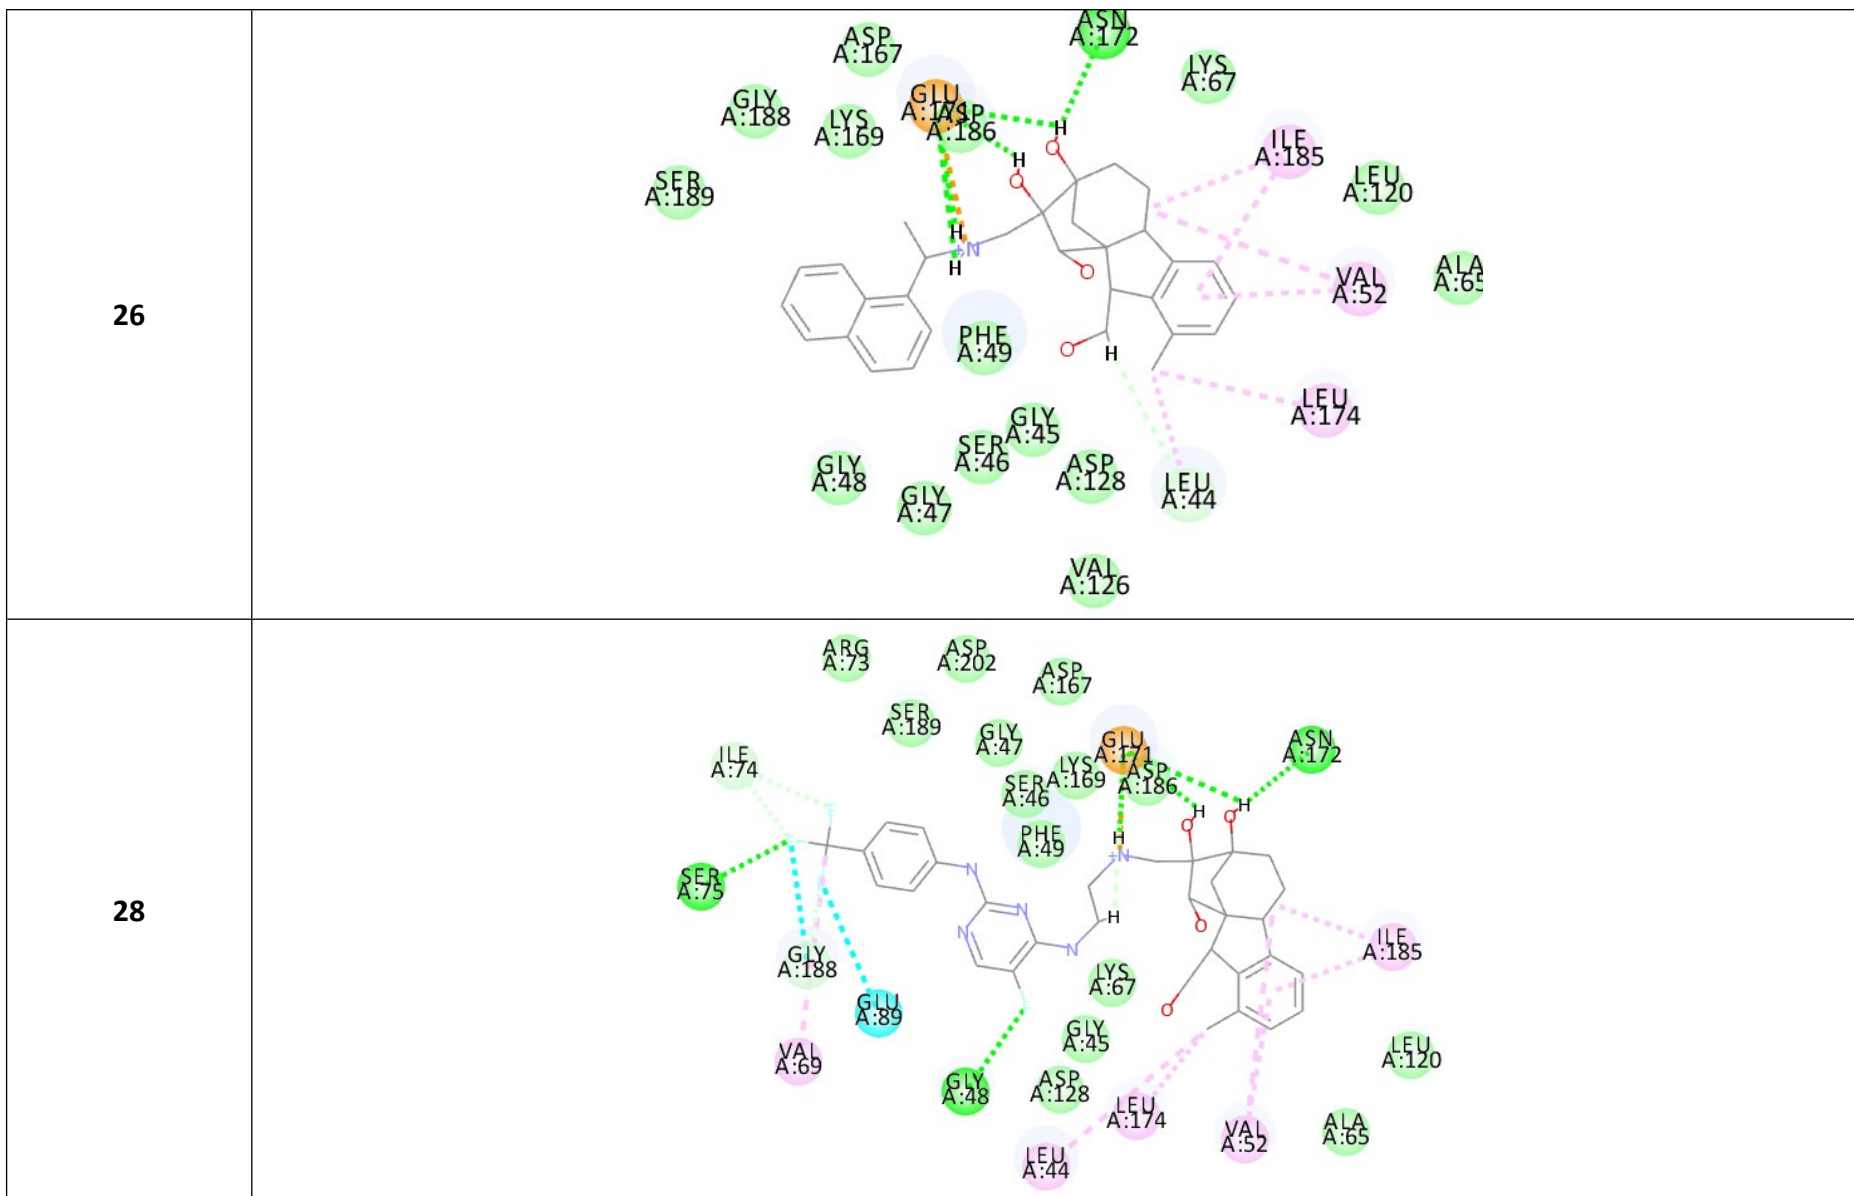









|                         |                                                                                                              |                                                                                                        |
|-------------------------|--------------------------------------------------------------------------------------------------------------|--------------------------------------------------------------------------------------------------------|
| <b>Key interactions</b> | <b>Interactions</b>                                                                                          |                                                                                                        |
|                         |  van der Waals              |  Halogen (Fluorine) |
|                         |  Attractive Charge          |  Pi-Anion           |
|                         |  Conventional Hydrogen Bond |  Alkyl              |
|                         |  Carbon Hydrogen Bond       |  Pi-Alkyl           |
